# Supplementary material for: High glucose treatment promotes extracellular matrix proteome remodeling in Mller glial cells
Source: PeerJ. 2021 May 18;9:e11316. doi: 10.7717/peerj.11316 (PMC8139267; doi:10.7717/peerj.11316)
Supplement: Supplemental Information 1 — A total of 2,744 proteins quantified with 2 unique peptides were detected across in all treatment groups and replicates. [file peerj-09-11316-s001.xlsx]

## Sheet: all quant 2 or more peptides
PG.ProteinAccessions	number of peptides used for quantification	ratio highgluc/ lowgluc	T-TEST highgluc/ lowgluc	ratio 2DG/ lowgluc	T-TEST 2DG/ lowgluc	Gene symbol	PG.ProteinDescriptions	mean lowgluc	[1] SAS11508X003__con1_92-68117.raw.PG.Quantity	[2] SAS11508X023__con2_92-68137.raw.PG.Quantity	[3] SAS11508X025__con3_92-68139.raw.PG.Quantity	[4] SAS11508X017__con4_92-68131.raw.PG.Quantity	mean highgluc	[7] SAS11508X016__hg1_92-68130.raw.PG.Quantity	[8] SAS11508X005__hg2_92-68119.raw.PG.Quantity	[9] SAS11508X028__hg3_92-68142.raw.PG.Quantity	[10] SAS11508X007__hg4_92-68121.raw.PG.Quantity	[11] SAS11508X010__hg5_92-68124.raw.PG.Quantity	[12] SAS11508X011__hg6_92-68125.raw.PG.Quantity	mean 2DG	[19] SAS11508X019__2DG1_92-68133.raw.PG.Quantity	[20] SAS11508X004__2DG2_92-68118.raw.PG.Quantity	[21] SAS11508X018__2DG3_92-68132.raw.PG.Quantity	[22] SAS11508X002__2DG4_92-68116.raw.PG.Quantity	[23] SAS11508X014__2DG5_92-68128.raw.PG.Quantity	[24] SAS11508X021__2DG6_92-68135.raw.PG.Quantity	[1] SAS11508X003__con1_92-68117.raw.PG.Quantity	[2] SAS11508X023__con2_92-68137.raw.PG.Quantity	[3] SAS11508X025__con3_92-68139.raw.PG.Quantity	[4] SAS11508X017__con4_92-68131.raw.PG.Quantity	[7] SAS11508X016__hg1_92-68130.raw.PG.Quantity	[8] SAS11508X005__hg2_92-68119.raw.PG.Quantity	[9] SAS11508X028__hg3_92-68142.raw.PG.Quantity	[10] SAS11508X007__hg4_92-68121.raw.PG.Quantity	[11] SAS11508X010__hg5_92-68124.raw.PG.Quantity	[12] SAS11508X011__hg6_92-68125.raw.PG.Quantity	[19] SAS11508X019__2DG1_92-68133.raw.PG.Quantity	[20] SAS11508X004__2DG2_92-68118.raw.PG.Quantity	[21] SAS11508X018__2DG3_92-68132.raw.PG.Quantity	[22] SAS11508X002__2DG4_92-68116.raw.PG.Quantity	[23] SAS11508X014__2DG5_92-68128.raw.PG.Quantity	[24] SAS11508X021__2DG6_92-68135.raw.PG.Quantity	[1] SAS11508X003__con1_92-68117.raw.PG.NrOfStrippedSequencesIdentified	[2] SAS11508X023__con2_92-68137.raw.PG.NrOfStrippedSequencesIdentified	[3] SAS11508X025__con3_92-68139.raw.PG.NrOfStrippedSequencesIdentified	[4] SAS11508X017__con4_92-68131.raw.PG.NrOfStrippedSequencesIdentified	[5] SAS11508X027__con5_92-68141.raw.PG.NrOfStrippedSequencesIdentified	[6] SAS11508X024__con6_92-68138.raw.PG.NrOfStrippedSequencesIdentified	[7] SAS11508X016__hg1_92-68130.raw.PG.NrOfStrippedSequencesIdentified
>ENSSSCP00000010417	3	1.2858	1.22666	1.19308	0.18779	AACS	acetoacetyl-CoA synthetase [Source:HGNC Symbol;Acc:21298]|14|ENSSSCG00000009755|ENSSSCT00000010695	27244.4	29295.9	27925.5	26823.4	24932.7	35030.8	35936.1	33148	36959.1	32276.3	32694.7	39170.9	32504.7	39945.7	20411.9	35500	30046.6	31204.2	37919.8	14.8384	14.7693	14.7112	14.6058	15.1331	15.0166	15.1736	14.9782	14.9968	15.2575	15.2858	14.3171	15.1155	14.8749	14.9295	15.2107	0	1	0	0	0	0	2
>ENSSSCP00000008900	16	1.04945	0.211003	1.0738	0.146455	AAK1	AP2 associated kinase 1 [Source:HGNC Symbol;Acc:19679]|3|ENSSSCG00000008337|ENSSSCT00000009130	255880	277395	250055	243952	252118	268532	253063	283600	273748	273577	275334	251873	274765	257400	276515	248497	294284	265224	306668	18.0816	17.9319	17.8962	17.9437	17.9491	18.1135	18.0625	18.0616	18.0708	17.9423	17.9737	18.077	17.9229	18.1669	18.0168	18.2263	9	10	11	8	2	3	13
>ENSSSCP00000002938	32	0.996846	0.981407	1.11565	0.0689183	AARS	alanyl-tRNA synthetase [Source:HGNC Symbol;Acc:20]|6|ENSSSCG00000002723|ENSSSCT00000003017	2.92832e+06	3.24441e+06	2.86719e+06	2.65067e+06	2.95103e+06	2.91909e+06	3.00492e+06	3.00399e+06	3009935	2.75043e+06	2.90172e+06	2.84355e+06	3.26699e+06	3.33033e+06	3524540	3.09629e+06	3.24867e+06	3.06192e+06	3.34022e+06	21.6295	21.4512	21.3379	21.4928	21.5189	21.5184	21.5213	21.3912	21.4685	21.4393	21.6672	21.749	21.5621	21.6314	21.546	21.6715	36	33	33	33	33	29	37
>ENSSSCP00000015923	3	0.978186	0.909441	1.02505	0.766736	AASDHPPT	aminoadipate-semialdehyde dehydrogenase-phosphopantetheinyl transferase [Source:HGNC Symbol;Acc:14235]|9|ENSSSCG00000014998|ENSSSCT00000016362	29752.3	37354.5	27836.4	23608.4	30209.9	29103.3	31101.4	32450.5	29558.1	24928.4	30292.9	26288.3	30497.7	34941	32200	25333.3	28400.5	30300.1	31811.2	15.189	14.7647	14.527	14.8827	14.9247	14.986	14.8513	14.6055	14.8867	14.6821	15.0926	14.9748	14.6287	14.7936	14.887	14.9572	2	2	2	1	2	1	2
>ENSSSCP00000008445	15	1.01902	0.935988	1.18706	0.10519	ABAT	Sus scrofa 4-aminobutyrate aminotransferase (ABAT), nuclear gene encoding mitochondrial protein, mRNA. [Source:RefSeq mRNA;Acc:NM_214263]|3|ENSSSCG00000007909|ENSSSCT00000008668	288860	308914	295833	251431	299261	294353	269211	220951	361688	336454	322040	255775	342893	406308	290211	408085	375349	310375	267028	18.2368	18.1744	17.9398	18.191	18.0384	17.7534	18.4644	18.36	18.2969	17.9645	18.6322	18.1467	18.6385	18.5179	18.2437	18.0266	6	13	10	7	6	8	12
>ENSSSCP00000017173	2	0.924646	0.0212536	1.06558	0.173085	ABCB6	ATP-binding cassette, sub-family B (MDR/TAP), member 6 [Source:HGNC Symbol;Acc:47]|15|ENSSSCG00000016210|ENSSSCT00000017651	318273	324561	312056	332587	303888	294290	292994	286866	281865	316185	300110	287719	339146	301165	379326	312510	347451	358835	335587	18.3081	18.2514	18.3434	18.2132	18.1605	18.13	18.1046	18.2704	18.1951	18.1343	18.2002	18.5331	18.2535	18.4065	18.453	18.3563	2	2	1	1	1	1	2
>ENSSSCP00000023719	5	1.35332	0.00288438	1.42827	0.00133422	ABCD3	Sus scrofa ATP-binding cassette, sub-family D (ALD), member 3 (ABCD3), mRNA. [Source:RefSeq mRNA;Acc:NM_001244133]|4|ENSSSCG00000028620|ENSSSCT00000032329	33872.7	34729.4	31106.9	31886.5	37768	45840.7	45261.6	41613.2	49768.6	47824.4	53727.4	36848.8	48379.4	50161.4	38113.3	55276.7	54639.9	48518	43566.9	15.0839	14.9249	14.9607	15.2049	15.466	15.3448	15.6029	15.5455	15.7134	15.1693	15.6143	15.218	15.7544	15.7377	15.5662	15.4109	7	8	3	4	2	2	11
>ENSSSCP00000009648	24	0.864616	0.171926	0.931915	0.488368	ABCE1	ATP-binding cassette, sub-family E (OABP), member 1 [Source:HGNC Symbol;Acc:69]|8|ENSSSCG00000009043|ENSSSCT00000009903	1.40047e+06	1.57036e+06	1.38063e+06	1.1187e+06	1532190	1.21087e+06	1.0848e+06	1434822	1.30476e+06	1.11384e+06	1.18159e+06	1145415	1.30512e+06	1.29027e+06	1.60381e+06	1.2451e+06	1.36828e+06	1.13781e+06	1185450	20.5827	20.3969	20.0934	20.5472	20.049	20.4524	20.3153	20.0871	20.1723	20.1274	20.2992	20.6131	20.2478	20.3839	20.1178	20.177	19	20	19	21	17	16	24
>ENSSSCP00000017421	4	0.893594	0.192276	0.748677	0.00794377	ABCF2	Uncharacterized protein [Source:UniProtKB/TrEMBL;Acc:F1SSL4]|18|ENSSSCG00000016441|ENSSSCT00000017902	33157.5	34406.6	27923	34816.4	35484	29629.3	30870.5	34606.1	30855.5	22877.8	27234.8	31331.1	24824.2	25124.1	23614.8	25382.8	23858.2	23205.8	27759.8	15.0704	14.7692	15.0875	15.1149	14.9139	15.0787	14.9132	14.4817	14.7332	14.9353	14.6168	14.5274	14.6316	14.5422	14.5022	14.7607	3	5	2	2	1	2	7
>ENSSSCP00000021222	5	1.00559	0.842509	1.12854	0.384583	ABCF3	Uncharacterized protein [Source:UniProtKB/TrEMBL;Acc:I3LB03]|13|ENSSSCG00000028856|ENSSSCT00000027528	71429.1	98865.6	65627.2	54220.3	67003.3	71828.5	77746.1	68902.4	75911.1	67044.5	64782	76585.1	80610.7	80990.6	105981	67678.1	80016.1	75661.4	73337.1	16.5932	16.002	15.7265	16.0319	16.2465	16.0723	16.212	16.0328	15.9833	16.2248	16.3055	16.6934	16.0464	16.288	16.2073	16.1623	3	3	4	3	0	2	5
>ENSSSCP00000025363	2	1.142	0.288042	1.42962	0.0414224	ABHD10	abhydrolase domain containing 10 [Source:HGNC Symbol;Acc:25656]|JH118611.1|ENSSSCG00000023561|ENSSSCT00000032283	13602	9960.54	12309	16580	15558.3	15533.5	14898.2	13948.6	15541.2	16666.6	16106.8	16039.5	19445.6	23298.9	20161.5	20591.4	16618	18299.5	17704.1	13.282	13.5874	14.0172	13.9254	13.8629	13.7678	13.9238	14.0247	13.9754	13.9693	14.508	14.2993	14.3298	14.0205	14.1595	14.1118	1	0	1	0	1	0	1
>ENSSSCP00000023095	7	1.05322	0.569375	1.17266	0.0111652	ABHD12	abhydrolase domain containing 12 [Source:HGNC Symbol;Acc:15868]|GL896323.1|ENSSSCG00000026876|ENSSSCT00000030598	142006	148611	137838	142756	138818	149563	138571	156743	181117	121104	171776	128067	166525	201473	167382	152512	162268	157299	158217	17.1812	17.0726	17.1232	17.0828	17.0803	17.258	17.4666	16.8859	17.3902	16.9665	17.6202	17.3528	17.2186	17.308	17.2631	17.2715	1	5	2	3	1	0	7
>ENSSSCP00000021124	4	1.29591	0.000790422	1.4607	9.69495e-05	ABHD14B	abhydrolase domain containing 14B [Source:HGNC Symbol;Acc:28235]|13|ENSSSCG00000026847|ENSSSCT00000027042	51690.3	50805.7	51953.1	52844.7	51157.5	66986	72925.6	55846.7	67078.9	69521.4	68645.5	67898	75504.1	73586.7	82327.1	80650.6	76681.3	75911.5	63867.7	15.6327	15.6649	15.6895	15.6427	16.1541	15.7692	16.0336	16.0852	16.0669	16.0511	16.1672	16.3291	16.2994	16.2266	16.212	15.9628	3	3	3	2	1	2	4
>ENSSSCP00000001512	2	0.967755	0.43212	0.992913	0.70438	ABHD16A	abhydrolase domain containing 16A [Source:HGNC Symbol;Acc:13921]|7|ENSSSCG00000001417|ENSSSCT00000001554	28931.1	28317.8	28775.5	29435.3	29195.8	27998.2	22740.1	29262.7	28690.1	30014.7	27447.3	29834.4	28726.1	29225.9	29666.1	28966	28641.1	29487.8	26369.5	14.7894	14.8126	14.8453	14.8335	14.473	14.8368	14.8083	14.8734	14.7444	14.8647	14.835	14.8565	14.8221	14.8058	14.8478	14.6866	2	1	1	1	0	0	2
>ENSSSCP00000012223	7	1.17998	0.0243151	1.17656	0.0463307	ABHD6	abhydrolase domain containing 6 [Source:HGNC Symbol;Acc:21398]|13|ENSSSCG00000011470|ENSSSCT00000012552	152605	164694	145148	151113	149464	180070	175969	179288	218543	180279	148786	177556	179549	208702	178160	173140	193482	137598	186211	17.3294	17.1472	17.2053	17.1894	17.425	17.4519	17.7376	17.4599	17.1829	17.4379	17.6711	17.4428	17.4016	17.5618	17.0701	17.5066	4	6	5	4	1	3	7
>ENSSSCP00000011798	5	0.961679	0.587553	0.949961	0.469715	ABI1	abl-interactor 1 [Source:HGNC Symbol;Acc:11320]|10|ENSSSCG00000011062|ENSSSCT00000012106	107744	121949	94581	112606	101841	103615	92776.2	112976	101659	106038	101499	106743	102353	93152.5	104569	99699.6	103471	107884	105339	16.8959	16.5293	16.7809	16.636	16.5015	16.7857	16.6334	16.6942	16.6311	16.7038	16.5073	16.6741	16.6053	16.6589	16.7191	16.6847	5	6	6	6	4	4	8
>ENSSSCP00000018863	8	1.10101	0.137921	1.02194	0.766663	ABR	active BCR-related [Source:HGNC Symbol;Acc:81]|12|ENSSSCG00000017804|ENSSSCT00000019377	155336	165160	150405	139076	166703	171027	192430	153234	185940	168825	170265	155466	158744	170697	139192	179232	168011	136647	158687	17.3335	17.1985	17.0855	17.3469	17.554	17.2254	17.5045	17.3652	17.3774	17.2462	17.3811	17.0867	17.4515	17.3582	17.0601	17.2758	8	5	4	6	4	6	6
>ENSSSCP00000004478	2	0.994087	0.984076	0.746	0.408733	ABRACL	ABRA C-terminal like [Source:HGNC Symbol;Acc:21230]|1|ENSSSCG00000004145|ENSSSCT00000004581	31516.1	23947	19786.1	57177.9	25153.5	31329.8	18669.9	34588.3	14160.1	44621.8	34784.7	41153.9	23511	16414.5	35824.4	19899.4	28032.3	24608.8	16286.8	14.5476	14.2722	15.8032	14.6185	14.1884	15.078	13.7895	15.4455	15.0862	15.3287	14.0027	15.1287	14.2804	14.7748	14.5869	13.9914	2	1	2	0	0	0	0
>ENSSSCP00000011995	2	1.32952	0.004067	1.18053	0.0757193	ACAA1	Uncharacterized protein [Source:UniProtKB/TrEMBL;Acc:F1RRB7]|13|ENSSSCG00000011250|ENSSSCT00000012317	21330.5	20229.9	19012.5	23687.7	22392.1	28359.3	26374.4	25909.1	30852.1	29853.6	29190.5	27976.1	25181.5	21376.4	27888.3	30122	24306.2	20695.1	26700.6	14.3042	14.2147	14.5319	14.4507	14.6869	14.6612	14.9131	14.8656	14.8332	14.7719	14.3837	14.7674	14.8785	14.569	14.337	14.7046	5	5	5	6	2	5	9
>ENSSSCP00000018749	13	0.868178	0.0342163	0.837776	0.0156427	ACACA	acetyl-CoA carboxylase alpha [Source:HGNC Symbol;Acc:84]|12|ENSSSCG00000017694|ENSSSCT00000019259	279942	305433	269285	255270	289779	243039	238609	243886	246926	232338	246402	250074	234528	224354	238949	248535	232588	229548	233196	18.2205	18.0388	17.9617	18.1446	17.8643	17.8958	17.9137	17.8259	17.9107	17.932	17.7754	17.8663	17.9231	17.8274	17.8084	17.8312	12	12	11	12	3	5	11
>ENSSSCP00000010604	2	1.07409	0.0813307	1.0281	0.51615	ACACB	acetyl-CoA carboxylase beta [Source:HGNC Symbol;Acc:85]|14|ENSSSCG00000009937|ENSSSCT00000010889	44610.1	45723.2	42006.1	44333.4	46377.7	47915.2	45123.8	44203.3	51970.3	49170.6	50996.6	46026.7	45863.7	51475.1	43073.5	41265.9	47296	45844.5	46227.2	15.4806	15.3583	15.4361	15.5011	15.4616	15.4319	15.6654	15.5855	15.6381	15.4902	15.6516	15.3945	15.3327	15.5294	15.4845	15.4965	2	2	2	2	2	2	2
>ENSSSCP00000016183	2	0.994434	0.871179	1.0877	0.150357	ACAD8	Uncharacterized protein [Source:UniProtKB/TrEMBL;Acc:F1S6C3]|9|ENSSSCG00000015260|ENSSSCT00000016629	34051.8	36354.4	32472.6	34642.9	32737.2	33862.2	31561.6	31848	33280.1	36034.6	33648.6	36800.4	37038.1	34912.6	39582	43368.8	37642.4	33771.6	32951	15.1498	14.9869	15.0803	14.9986	14.9459	14.9589	15.0224	15.1371	15.0383	15.1674	15.0915	15.2726	15.4044	15.2001	15.0435	15.008	2	2	3	2	2	1	3
>ENSSSCP00000027866	12	0.902302	0.0141687	0.912764	0.025846	ACAD9	acyl-CoA dehydrogenase family, member 9 [Source:HGNC Symbol;Acc:21497]|13|ENSSSCG00000023354|ENSSSCT00000023990	233138	249590	226872	224036	232056	210361	215194	211194	201038	196517	215225	222999	212800	214831	225488	192655	211103	213100	219624	17.9292	17.7915	17.7734	17.8241	17.7153	17.6882	17.6171	17.5843	17.7155	17.7667	17.7128	17.7827	17.5557	17.6876	17.7012	17.7447	7	6	7	7	2	5	11
>ENSSSCP00000017114	15	1.0217	0.439369	1.08968	0.0773401	ACADL	Sus scrofa acyl-CoA dehydrogenase, long chain (ACADL), nuclear gene encoding mitochondrial protein, mRNA. [Source:RefSeq mRNA;Acc:NM_213897]|15|ENSSSCG00000016156|ENSSSCT00000017589	501066	513796	520597	472547	497323	511939	533814	493486	522282	495327	528562	498163	546002	559886	467071	586896	522425	581158	558578	18.9708	18.9898	18.8501	18.9238	19.026	18.9127	18.9945	18.918	19.0117	18.9263	19.0948	18.8333	19.1627	18.9949	19.1486	19.0914	12	12	10	10	8	7	12
>ENSSSCP00000004085	14	0.929865	0.0563413	0.931601	0.0609964	ACADM	Sus scrofa acyl-CoA dehydrogenase, C-4 to C-12 straight chain (ACADM), nuclear gene encoding mitochondrial protein, mRNA. [Source:RefSeq mRNA;Acc:NM_214039]|6|ENSSSCG00000003776|ENSSSCT00000004179	1.2456e+06	1.31999e+06	1.16889e+06	1.23156e+06	1.26196e+06	1.15824e+06	1.108e+06	1.16633e+06	1.1885e+06	1.169e+06	1.11324e+06	1.20438e+06	1.1604e+06	1.15824e+06	1208815	1.20284e+06	1140978	1.153e+06	1.09856e+06	20.3321	20.1567	20.2321	20.2672	20.0795	20.1535	20.1807	20.1568	20.0863	20.1999	20.1435	20.2052	20.198	20.1218	20.137	20.0672	13	14	14	14	11	10	14
>ENSSSCP00000010581	5	1.16525	0.0525502	1.28324	0.0107416	ACADS	acyl-CoA dehydrogenase, C-2 to C-3 short chain [Source:HGNC Symbol;Acc:90]|14|ENSSSCG00000009916|ENSSSCT00000010866	103948	117878	96273.6	107998	93641	121125	128195	111539	121673	131591	112002	121753	133390	143426	137816	126338	137636	133236	121888	16.8469	16.5549	16.7206	16.5149	16.968	16.7672	16.8926	17.0057	16.7732	16.8936	17.13	17.0724	16.9469	17.0705	17.0236	16.8952	3	4	3	3	3	3	6
>ENSSSCP00000011432	12	0.999399	0.976838	1.0166	0.79144	ACADSB	acyl-CoA dehydrogenase, short/branched chain [Source:HGNC Symbol;Acc:91]|14|ENSSSCG00000010723|ENSSSCT00000011734	261235	278178	257246	257507	252008	261078	242347	261831	274250	274397	263060	250582	265572	243648	308106	253610	279454	274874	233738	18.0856	17.9728	17.9743	17.9431	17.8867	17.9983	18.0651	18.0659	18.005	17.9349	17.8944	18.2331	17.9523	18.0923	18.0684	17.8345	7	11	10	9	7	6	10
>ENSSSCP00000024911	8	0.972216	0.350515	1.01249	0.850094	ACADVL	Uncharacterized protein [Source:UniProtKB/TrEMBL;Acc:I3LLE3]|3|ENSSSCG00000020972|ENSSSCT00000030141	281043	273523	265868	294516	290264	273235	278566	278128	268254	265335	279664	269461	284553	291368	249691	307274	264178	270291	324515	18.0613	18.0204	18.168	18.147	18.0877	18.0854	18.0332	18.0175	18.0933	18.0397	18.1525	17.9298	18.2292	18.0112	18.0442	18.3079	15	16	14	15	12	10	17
>ENSSSCP00000025827	13	0.938865	0.126181	0.893673	0.0487695	ACAT1	acetyl-CoA acetyltransferase 1 [Source:HGNC Symbol;Acc:93]|9|ENSSSCG00000026153|ENSSSCT00000028484	841322	788279	859111	863430	854467	789888	787967	758186	816145	878872	799056	699100	751866	662853	730863	839543	848526	762665	666747	19.5883	19.7125	19.7197	19.7047	19.5878	19.5322	19.6385	19.7453	19.6079	19.4151	19.3383	19.4792	19.6792	19.6946	19.5407	19.3468	12	14	13	13	7	9	13
>ENSSSCP00000004375	10	1.04203	0.291442	1.01085	0.826182	ACAT2	acetyl-CoA acetyltransferase 2 [Source:HGNC Symbol;Acc:94]|1|ENSSSCG00000004049|ENSSSCT00000004477	1.51312e+06	1.61088e+06	1.37667e+06	1537871	1.52705e+06	1.57671e+06	1.54081e+06	1.53723e+06	1.60331e+06	1.58897e+06	1.57997e+06	1.60999e+06	1.52953e+06	1.4839e+06	1.69729e+06	1.63163e+06	1.51096e+06	1395707	1.45768e+06	20.6194	20.3928	20.5525	20.5423	20.5553	20.5519	20.6126	20.5997	20.5915	20.6186	20.501	20.6948	20.6379	20.527	20.4126	20.4752	10	10	10	10	8	10	11
>ENSSSCP00000024652	7	0.891857	0.0116703	0.879864	0.00398384	ACBD3	acyl-CoA binding domain containing 3 [Source:HGNC Symbol;Acc:15453]|GL893507.1|ENSSSCG00000024180|ENSSSCT00000027902	119376	115193	123763	114125	124423	106466	105740	119828	98280.9	103993	107557	103399	105035	96762.2	107273	105451	110219	106578	103924	16.8137	16.9172	16.8003	16.9249	16.6902	16.8706	16.5846	16.6661	16.7147	16.6579	16.5622	16.7109	16.6862	16.75	16.7016	16.6652	4	6	5	6	4	5	5
>ENSSSCP00000011800	2	1.26387	0.0466437	1.34151	0.000213294	ACBD5	Uncharacterized protein [Source:UniProtKB/TrEMBL;Acc:F1RVK3]|10|ENSSSCG00000011064|ENSSSCT00000012108	15067.3	14968.6	15232.5	14692.5	15375.7	19043.1	21032.5	12892.4	21823	17312.8	21871.3	19326.6	20213	22674.3	20254.9	20857.1	20655.5	17703.5	19133	13.8697	13.8949	13.8428	13.9084	14.3603	13.6542	14.4136	14.0796	14.4168	14.2383	14.4688	14.306	14.3483	14.3342	14.1117	14.2238	1	1	1	1	1	0	2
>ENSSSCP00000002224	16	0.985766	0.641739	0.929482	0.11036	ACIN1	apoptotic chromatin condensation inducer 1 [Source:HGNC Symbol;Acc:17066]|7|ENSSSCG00000002034|ENSSSCT00000002276	264089	254310	270214	272416	259418	260330	251325	292803	262324	237780	252275	265475	245466	267394	216758	261632	265094	240093	221826	17.9562	18.0437	18.0555	17.9849	17.9392	18.1596	18.001	17.8593	17.9446	18.0182	18.0286	17.7257	17.9972	18.0161	17.8732	17.7591	8	15	13	12	4	6	15
>ENSSSCP00000018460	24	0.849501	0.0166584	0.827324	0.00714886	ACLY	ATP citrate lyase [Source:HGNC Symbol;Acc:115]|12|ENSSSCG00000017421|ENSSSCT00000018965	2.3825e+06	2.58928e+06	2.26869e+06	2.19406e+06	2.47795e+06	2.02393e+06	2.06049e+06	2.08753e+06	2.10282e+06	1.69036e+06	2.01833e+06	2.18408e+06	1.9711e+06	2.01523e+06	2.15422e+06	1.83455e+06	1860745	1.8647e+06	2.09714e+06	21.3041	21.1134	21.0652	21.2407	20.9746	20.9934	21.0039	20.6889	20.9447	21.0586	20.9425	21.0387	20.807	20.8274	20.8305	21	22	22	20	23	19	19	23
>ENSSSCP00000024376	20	1.08628	0.141428	1.04835	0.216042	ACO1	aconitase 1, soluble [Source:HGNC Symbol;Acc:117]|10|ENSSSCG00000023807|ENSSSCT00000023699	428098	465183	417501	405012	424694	465032	559561	452518	437058	433675	444351	463029	448795	459965	442411	458296	465613	420339	446145	18.8274	18.6714	18.6276	18.6961	19.0939	18.7876	18.7375	18.7263	18.7613	18.8207	18.8112	18.755	18.8059	18.8288	18.6812	18.7672	16	16	14	15	13	11	23
>ENSSSCP00000000070	36	0.957866	0.0379254	1.02013	0.358741	ACO2	aconitase 2, mitochondrial [Source:HGNC Symbol;Acc:118]|5|ENSSSCG00000000064|ENSSSCT00000000070	5935250	6.01029e+06	5984529	5759761	5.98642e+06	5.68517e+06	5669586	5518913	5933326	5708504	5867693	5.41301e+06	6.05475e+06	5953300	5.79866e+06	6.47065e+06	6229154	5833633	6.04313e+06	22.519	22.5128	22.4576	22.5133	22.4348	22.396	22.5004	22.4447	22.4844	22.368	22.5053	22.4673	22.6255	22.5706	22.476	22.5269	30	35	32	34	30	31	33
>ENSSSCP00000001164	2	1.09077	0.548068	1.3556	0.168779	ACOT13	acyl-CoA thioesterase 13 [Source:HGNC Symbol;Acc:20999]|7|ENSSSCG00000001093|ENSSSCT00000001189	12592.3	8605.21	12798.5	19746.2	9219.32	13735.4	11755.8	11637.6	13912.9	18095.1	13354.2	13656.6	17070.1	12268.9	18477.1	17223	20372.1	19964.9	14114.4	13.071	13.6437	14.2693	13.1704	13.5211	13.5065	13.7641	14.1433	13.705	13.7373	13.5827	14.1735	14.072	14.3143	14.2852	13.7849	0	3	2	2	0	0	2
>ENSSSCP00000002547	4	1.03019	0.258109	1.15026	0.000202949	ACOT6	acyl-CoA thioesterase 6 [Source:HGNC Symbol;Acc:33159]|7|ENSSSCG00000002348|ENSSSCT00000002612	185078	186099	177428	187827	188957	190665	188607	177448	197352	196631	200052	183899	212887	221715	213731	223407	208980	202498	206992	17.5057	17.4369	17.519	17.5277	17.525	17.437	17.5904	17.5851	17.61	17.4886	17.7583	17.7054	17.7693	17.673	17.6275	17.6592	3	4	4	4	2	2	5
>ENSSSCP00000003661	7	0.91164	0.0030311	0.87878	0.0046737	ACOT7	acyl-CoA thioesterase 7 [Source:HGNC Symbol;Acc:24157]|6|ENSSSCG00000003377|ENSSSCT00000003747	274709	280220	279229	269797	269591	250436	242544	268573	249819	243639	259949	238093	241409	226461	238589	242131	226262	240755	274254	18.0962	18.0911	18.0415	18.0404	17.8879	18.035	17.9305	17.8944	17.9879	17.8612	17.7889	17.8642	17.8854	17.7876	17.8772	18.0652	5	7	6	6	4	5	7
>ENSSSCP00000018221	7	0.825165	0.669323	0.971113	0.844245	ACOX1	peroxisomal acyl-coenzyme A oxidase 1 [Source:RefSeq peptide;Acc:NP_001094498]|12|ENSSSCG00000017198|ENSSSCT00000018723	96573.4	161819	67358.6	56904.1	100212	79689.1	81285	70928.2	88136.7	79997.3	77526.3	80260.9	93783.7	85103.2	84498.5	86049.9	106218	100368	100465	17.304	16.0396	15.7962	16.6127	16.3107	16.1141	16.4275	16.2877	16.2424	16.2924	16.3769	16.3666	16.3929	16.6967	16.6149	16.6163	3	6	3	2	2	2	7
>ENSSSCP00000026381	2	0.971941	0.562837	0.952887	0.332931	ACOXL	Uncharacterized protein [Source:UniProtKB/TrEMBL;Acc:I3LQK1]|13|ENSSSCG00000020690|ENSSSCT00000032304	80996.7	86479.8	80044.7	73319.7	84142.6	78724	79965.9	76828	73392.8	71592	84024.4	86540.7	77180.7	84548.1	73719.5	79642.9	68979.3	77411.8	78782.5	16.4001	16.2885	16.1619	16.3605	16.2871	16.2293	16.1634	16.1275	16.3585	16.4011	16.3675	16.1698	16.2813	16.0739	16.2403	16.2656	2	1	1	2	2	2	2
>ENSSSCP00000009232	2	0.896945	0.397066	0.908676	0.46562	ACP1	Uncharacterized protein [Source:UniProtKB/TrEMBL;Acc:F1S9H9]|JH118500.1|ENSSSCG00000024700|ENSSSCT00000009475	164798	133221	158139	209094	158740	147815	118475	127501	124668	222141	130114	163991	149748	87662.8	204116	131085	156067	186361	133199	17.0235	17.2708	17.6738	17.2763	16.8542	16.9601	16.9277	17.7611	16.9894	17.3233	16.4197	17.639	17.0001	17.2518	17.5077	17.0232	5	5	5	5	2	3	5
>ENSSSCP00000018615	15	1.05299	0.26942	1.13461	0.00726617	ACSF2	acyl-CoA synthetase family member 2 [Source:HGNC Symbol;Acc:26101]|12|ENSSSCG00000017566|ENSSSCT00000019121	600922	635737	590847	600870	576235	632763	698195	651818	630532	632258	646979	536794	681813	733814	661277	734438	665968	613215	682164	19.2781	19.1724	19.1967	19.1363	19.4133	19.3141	19.2662	19.2702	19.3034	19.034	19.4851	19.3349	19.4863	19.3451	19.226	19.3798	11	15	13	12	11	11	15
>ENSSSCP00000024486	2	1.07983	0.382761	1.00584	0.898551	ACSF3	acyl-CoA synthetase family member 3 [Source:HGNC Symbol;Acc:27288]|6|ENSSSCG00000023866|ENSSSCT00000022729	14098.2	11935.4	15317	15336.1	13804.3	15223.7	16448.7	17377.7	14677.3	16940	12959.4	12939.1	14180.6	13350.4	14959.4	13678.8	15599	13003.8	14492.1	13.543	13.9028	13.9046	13.7528	14.0057	14.085	13.8413	14.0481	13.6617	13.6595	13.7046	13.8688	13.7397	13.9292	13.6666	13.823	0	2	1	1	0	0	1
>ENSSSCP00000016726	10	1.06633	0.224803	1.09313	0.139694	ACSL1	Sus scrofa acyl-CoA synthetase long-chain family member 1 (ACSL1), mRNA. [Source:RefSeq mRNA;Acc:NM_001167629]|15|ENSSSCG00000015784|ENSSSCT00000017187	134316	144708	122183	139703	130669	143225	159681	137667	149786	131255	145506	135458	146824	170005	141041	150680	151717	134811	132690	17.1428	16.8987	17.092	16.9956	17.2848	17.0708	17.1925	17.002	17.1507	17.0475	17.3752	17.1058	17.2011	17.211	17.0406	17.0177	5	6	6	6	2	3	9
>ENSSSCP00000017187	14	1.07093	0.523673	1.24741	0.18346	ACSL3	acyl-CoA synthetase long-chain family member 3 [Source:HGNC Symbol;Acc:3570]|15|ENSSSCG00000016223|ENSSSCT00000017665	373846	461254	421400	341937	270793	400362	396098	351045	416360	422522	388967	427182	466338	578786	326619	464816	469463	392479	565868	18.8152	18.6848	18.3834	18.0468	18.5955	18.4213	18.6675	18.6887	18.5693	18.7045	19.1427	18.3172	18.8263	18.8407	18.5823	19.1101	9	11	10	10	4	8	13
>ENSSSCP00000007596	8	1.078	0.26717	1.1866	0.0469544	ACSS1	acyl-CoA synthetase short-chain family member 1 [Source:HGNC Symbol;Acc:16091]|17|ENSSSCG00000007133|ENSSSCT00000007805	90592.5	102248	81264.9	83067.5	95789.3	97658.3	103358	91642.3	97189	100550	104059	89151.6	107497	110461	99736	115693	113488	115468	90135.7	16.6417	16.3103	16.342	16.5476	16.6573	16.4837	16.5685	16.6175	16.667	16.444	16.7532	16.6058	16.8199	16.7922	16.8171	16.4598	4	6	2	3	2	2	8
>ENSSSCP00000007758	9	1.20518	0.0557054	1.39714	0.0112097	ACSS2	acyl-CoA synthetase short-chain family member 2 [Source:HGNC Symbol;Acc:15814]|17|ENSSSCG00000007286|ENSSSCT00000007971	108948	129896	101702	95344.2	108848	131301	143269	135346	127120	117218	141755	123099	152215	154082	150762	159961	154063	139484	154938	16.987	16.634	16.5409	16.732	17.1284	17.0463	16.9558	16.8388	17.113	16.9095	17.2333	17.2019	17.2874	17.2332	17.0897	17.2413	3	6	2	3	1	0	7
>ENSSSCP00000012532	5	0.830241	0.132423	0.920363	0.471873	ACTL6A	actin-like 6A [Source:HGNC Symbol;Acc:24124]|13|ENSSSCG00000011762|ENSSSCT00000012873	122252	147403	131007	109757	100840	101498	134492	95170.4	100006	84549.5	103018	91754.7	112516	121135	136916	104408	86848.2	121530	104258	17.1694	16.9993	16.744	16.6217	17.0372	16.5382	16.6097	16.3675	16.6525	16.4855	16.8863	17.0629	16.6719	16.4062	16.891	16.6698	1	4	4	3	0	1	2
>ENSSSCP00000026895	20	0.90935	0.217542	0.778001	0.00969618	ACTN1	Uncharacterized protein [Source:UniProtKB/TrEMBL;Acc:I3LS04]|7|ENSSSCG00000020703|ENSSSCT00000029512	19518471	22251766	18077148	17556010	20188960	1.77491e+07	18372210	21466972	16579821	15705668	16912638	17457390	15185390	15101043	16143782	14613377	13297170	14405850	17551118	24.4074	24.1077	24.0655	24.2671	24.131	24.3556	23.9829	23.9048	24.0116	24.0573	23.8481	23.9445	23.8008	23.6646	23.7802	24.0651	20	20	19	20	19	19	19
>ENSSSCP00000003207	38	0.964218	0.187214	0.899767	0.00480814	ACTN4	Uncharacterized protein [Source:UniProtKB/TrEMBL;Acc:F1RI39]|6|ENSSSCG00000002965|ENSSSCT00000003289	2.14137e+07	22522948	21332522	20492394	21306786	20647429	20451612	22238428	20373728	20500300	20200890	20119616	1.92673e+07	18732656	20091366	19445378	18658874	18859412	19816148	24.4249	24.3466	24.2886	24.3448	24.2857	24.4066	24.2802	24.2891	24.2679	24.2621	24.1591	24.2601	24.2129	24.1534	24.1688	24.2402	56	57	56	57	55	55	57
>ENSSSCP00000023552	16	1.03439	0.427593	1.0684	0.047817	ACTR10	Uncharacterized protein [Source:UniProtKB/TrEMBL;Acc:I3LHK5]|1|ENSSSCG00000022299|ENSSSCT00000030515	419326	443906	399836	420796	412768	433747	445524	450673	425272	391970	404814	484232	448007	466057	456136	443152	439741	423685	459270	18.7599	18.6091	18.6828	18.655	18.7651	18.7817	18.698	18.5804	18.6269	18.8853	18.8301	18.7991	18.7574	18.7463	18.6926	18.809	11	14	10	10	7	4	14
>ENSSSCP00000011276	7	0.964065	0.626222	0.96099	0.584503	ACTR1A	ARP1 actin-related protein 1 homolog A, centractin alpha (yeast) [Source:HGNC Symbol;Acc:167]|14|ENSSSCG00000010585|ENSSSCT00000011578	2029361	2.36412e+06	1.95577e+06	1.80407e+06	1993486	1.95644e+06	2.10213e+06	2.09222e+06	1.99871e+06	1.81047e+06	1.6764e+06	2.0587e+06	1.9502e+06	2.03819e+06	1.91263e+06	2.03672e+06	1.8673e+06	1.88666e+06	1.95968e+06	21.1729	20.8993	20.7828	20.9269	21.0034	20.9966	20.9306	20.7879	20.6769	20.9733	20.9589	20.8671	20.9578	20.8325	20.8474	20.9022	4	5	5	5	5	4	5
>ENSSSCP00000008747	3	1.04493	0.220524	1.15612	0.00300711	ACTR1B	ARP1 actin-related protein 1 homolog B, centractin beta (yeast) [Source:HGNC Symbol;Acc:168]|3|ENSSSCG00000008194|ENSSSCT00000008973	175310	180782	183733	167210	169515	183186	192111	171051	195239	189062	175389	176263	202680	208292	180364	205679	215081	203282	203380	17.4639	17.4873	17.3513	17.3711	17.5516	17.3841	17.5749	17.5285	17.4202	17.4274	17.6682	17.4605	17.65	17.7145	17.6331	17.6338	10	9	9	10	8	8	9
>ENSSSCP00000008921	16	0.999157	0.9913	0.985841	0.826989	ACTR2	Sus scrofa ARP2 actin-related protein 2 homolog (yeast) (ACTR2), mRNA. [Source:RefSeq mRNA;Acc:NM_001134354]|3|ENSSSCG00000008358|ENSSSCT00000009152	3.60666e+06	4.01535e+06	3.38928e+06	3268456	3753535	3.60362e+06	3.78844e+06	3698686	3.80434e+06	3.19588e+06	3.68505e+06	3.44931e+06	3.55559e+06	3.6839e+06	3.57266e+06	3.5385e+06	3464971	3284532	3.78897e+06	21.9371	21.6925	21.6402	21.8398	21.8532	21.8186	21.8592	21.6078	21.8133	21.7179	21.8128	21.7686	21.7547	21.7244	21.6473	21.8534	14	16	15	14	14	15	16
>ENSSSCP00000016650	14	0.994179	0.877873	0.97631	0.567668	ACTR3	Sus scrofa ARP3 actin-related protein 3 homolog (yeast) (ACTR3), mRNA. [Source:RefSeq mRNA;Acc:NM_001134343]|15|ENSSSCG00000015710|ENSSSCT00000017110	4.63026e+06	4.93237e+06	4.31845e+06	4.51725e+06	4752979	4.60331e+06	4.96821e+06	4.73639e+06	4712718	4199427	4.37119e+06	4.63192e+06	4.52057e+06	4790685	4738911	4.4939e+06	3.99637e+06	4303728	4799835	22.2338	22.0421	22.107	22.1804	22.2443	22.1754	22.1681	22.0018	22.0596	22.1432	22.1918	22.1761	22.0995	21.9303	22.0372	22.1946	18	18	17	18	16	17	18
>ENSSSCP00000025679	17	0.914918	0.327894	1.00677	0.908453	ACY1	Sus scrofa aminoacylase 1 (ACY1), mRNA. [Source:RefSeq mRNA;Acc:NM_213896]|13|ENSSSCG00000023325|ENSSSCT00000027267	1.18119e+06	1.29303e+06	1.20218e+06	1.25169e+06	977875	1.0807e+06	1.36555e+06	893869	1.21849e+06	1.01041e+06	1004622	991235	1.18919e+06	1.09154e+06	1.3401e+06	1.18361e+06	1095499	1.31331e+06	1.11108e+06	20.3023	20.1972	20.2554	19.8993	20.381	19.7697	20.2167	19.9465	19.9382	19.9189	20.0579	20.3539	20.1748	20.0632	20.3248	20.0835	10	13	12	12	11	10	15
>ENSSSCP00000002579	2	1.08542	0.820172	1.01261	0.840298	ACYP1	Sus scrofa acylphosphatase 1, erythrocyte (common) type (ACYP1), transcript variant 1, mRNA. [Source:RefSeq mRNA;Acc:NM_001190198]|7|ENSSSCG00000002379|ENSSSCT00000002646	37292.1	20358.6	31666	60110.2	37033.5	40477.6	27183.8	24456.4	29054.5	80326.3	37586.9	44257.7	37762.3	11116.9	65290	25189	40568.7	59040.2	25369	14.3134	14.9506	15.8753	15.1765	14.7305	14.5779	14.8265	16.2936	15.1979	15.4336	13.4405	15.9946	14.6205	15.3081	15.8494	14.6308	0	1	2	1	0	0	2
>ENSSSCP00000004951	2	0.951371	0.10304	0.867936	0.0044969	ADAM10	ADAM metallopeptidase domain 10 [Source:HGNC Symbol;Acc:188]|1|ENSSSCG00000004594|ENSSSCT00000005075	381212	395215	371977	366604	391052	362674	393020	353857	375210	345572	359452	348936	330868	355284	323917	286950	345928	331935	341194	18.5923	18.5049	18.4839	18.577	18.5842	18.4328	18.5173	18.3986	18.4554	18.4126	18.4386	18.3053	18.1304	18.4001	18.3405	18.3802	2	2	2	2	2	2	2
>ENSSSCP00000016755	13	0.921011	0.0102334	0.812583	2.8123e-05	ADAM9	Uncharacterized protein [Source:UniProtKB/TrEMBL;Acc:F1RZL4]|15|ENSSSCG00000015808|ENSSSCT00000017216	321028	328954	325822	308691	320646	295671	290266	299478	281145	280855	320308	301971	260862	247092	267261	266257	280870	251665	252028	18.3275	18.3137	18.2358	18.2906	18.147	18.1921	18.101	18.0995	18.2891	18.204	17.9147	18.0279	18.0225	18.0995	17.9411	17.9432	11	9	7	9	5	6	11
>ENSSSCP00000006975	6	1.09332	0.0707397	0.984282	0.706333	ADAR	adenosine deaminase, RNA-specific [Source:HGNC Symbol;Acc:225]|4|ENSSSCG00000006543|ENSSSCT00000007168	86887	84022.4	82498.3	93283.9	87743.5	94995	99261.1	107856	86593.2	90736.9	90844.2	94678.9	85521.3	91424.7	72177	91051.1	84998.2	91022.5	82454.5	16.3585	16.3321	16.5093	16.421	16.5989	16.7187	16.402	16.4694	16.4711	16.5308	16.4803	16.1393	16.4744	16.3751	16.4739	16.3313	2	4	4	5	1	3	7
>ENSSSCP00000009266	22	1.1184	0.0190994	1.15971	0.00391825	ADD1	Adducin 1 (Alpha); Sterol regulatory element-binding protein 1 [Source:UniProtKB/TrEMBL;Acc:F1S8P9]|8|ENSSSCG00000008692|ENSSSCT00000009510	1.51514e+06	1.61263e+06	1.52269e+06	1.42377e+06	1501444	1.69453e+06	1.70138e+06	1.6942e+06	1.68069e+06	1.70137e+06	1.72939e+06	1660141	1.75713e+06	1.82391e+06	1.70866e+06	1.9529e+06	1.69582e+06	1664518	1.69695e+06	20.621	20.5382	20.4413	20.5179	20.6983	20.6922	20.6806	20.6983	20.7218	20.6629	20.7986	20.7044	20.8972	20.6936	20.6667	20.6945	14	19	15	16	11	11	21
>ENSSSCP00000011315	20	1.11609	0.0177627	1.17613	0.00346572	ADD3	adducin 3 (gamma) [Source:HGNC Symbol;Acc:245]|14|ENSSSCG00000010621|ENSSSCT00000011617	1.46611e+06	1.52811e+06	1.52019e+06	1356316	1.45981e+06	1.6363e+06	1.66452e+06	1.54003e+06	1.7521e+06	1.64079e+06	1663021	1.55735e+06	1.72434e+06	1.84971e+06	1.55245e+06	1816112	1.77068e+06	1.68959e+06	1667487	20.5433	20.5358	20.3713	20.4774	20.6667	20.5545	20.7407	20.646	20.6654	20.5707	20.8189	20.5661	20.7924	20.7559	20.6882	20.6692	17	18	18	18	11	12	20
>ENSSSCP00000003034	4	1.08428	0.150052	0.951789	0.238028	ADGRG1	G protein-coupled receptor 56 [Source:HGNC Symbol;Acc:4512]|6|ENSSSCG00000002815|ENSSSCT00000003115	40346.7	39343.2	38253.7	39633.4	44156.6	43747.2	40534.5	37615.2	48498.6	44705.2	44656.7	46473.3	38401.6	36843.5	38215	38060.1	36567.2	41114	39609.9	15.2638	15.2233	15.2744	15.4303	15.3069	15.199	15.5657	15.4482	15.4466	15.5041	15.1691	15.2219	15.216	15.1583	15.3273	15.2736	2	4	4	1	1	2	4
>ENSSSCP00000009795	13	1.07487	0.0898282	1.14052	0.0132712	ADH5	alcohol dehydrogenase 5 (class III), chi polypeptide [Source:HGNC Symbol;Acc:253]|8|ENSSSCG00000009185|ENSSSCT00000010058	2.24234e+06	2413845	2.08628e+06	2.26914e+06	2200113	2.41022e+06	2.32966e+06	2456969	2479409	2.30947e+06	2.48018e+06	2.40563e+06	2.55743e+06	2473334	2.67594e+06	2.65264e+06	2.52113e+06	2.40456e+06	2.61697e+06	21.2029	20.9925	21.1137	21.0691	21.1517	21.2284	21.2416	21.1391	21.242	21.198	21.238	21.3516	21.339	21.2656	21.1973	21.3195	14	14	12	14	13	10	13
>ENSSSCP00000022476	8	0.872062	0.382127	0.969568	0.879716	ADI1	acireductone dioxygenase 1 [Source:HGNC Symbol;Acc:30576]|3|ENSSSCG00000029161|ENSSSCT00000026549	427997	316074	403674	550014	442227	373240	247314	366199	399229	512846	368017	345838	414973	317550	485716	429525	418601	461481	376963	18.2699	18.6228	19.0691	18.7544	17.916	18.4823	18.6069	18.9682	18.4894	18.3997	18.2766	18.8898	18.7124	18.6752	18.8159	18.5241	4	7	7	5	4	4	6
>ENSSSCP00000011000	13	1.06682	0.0874661	1.02331	0.467469	ADK	adenosine kinase [Source:HGNC Symbol;Acc:257]|14|ENSSSCG00000010315|ENSSSCT00000011292	387133	413198	376564	366328	392440	412999	397140	412869	416078	403142	402600	446166	396155	385463	398201	395894	378192	418951	400228	18.6565	18.5225	18.4828	18.5821	18.5993	18.6553	18.6665	18.6209	18.619	18.7672	18.5562	18.6031	18.5948	18.5288	18.6764	18.6105	12	11	10	11	11	9	12
>ENSSSCP00000010898	4	1.10815	0.128568	1.1114	0.115662	ADO	2-aminoethanethiol (cysteamine) dioxygenase [Source:HGNC Symbol;Acc:23506]|14|ENSSSCG00000010223|ENSSSCT00000011189	37452.9	34212.3	40956.7	40356	34286.6	41503.3	41511.1	38356.3	43801.5	41817.2	45490.4	38043.6	41625	38317.5	40767.3	44177.6	44856.6	41824	39806.9	15.0622	15.3218	15.3005	15.0654	15.3412	15.2272	15.4187	15.3518	15.4733	15.2154	15.2257	15.3151	15.431	15.453	15.352	15.2807	0	2	2	2	0	2	2
>ENSSSCP00000002103	3	0.986267	0.840504	0.954977	0.501691	ADPGK	ADP-dependent glucokinase [Source:HGNC Symbol;Acc:25250]|7|ENSSSCG00000001925|ENSSSCT00000002154	45770.1	40364.4	46550.4	51337.3	44828.4	45141.6	40641.5	42799.3	45068.2	47622.9	45522.6	49194.9	43709.4	46510.6	37687.5	48441.2	45022.2	46440.9	38154	15.3008	15.5065	15.6477	15.4521	15.3107	15.3853	15.4598	15.5394	15.4743	15.5862	15.5053	15.2018	15.5639	15.4583	15.5031	15.2195	2	2	1	1	1	1	3
>ENSSSCP00000003939	8	1.01934	0.474386	1.10393	0.0673283	ADPRHL2	ADP-ribosylhydrolase like 2 [Source:HGNC Symbol;Acc:21304]|6|ENSSSCG00000003634|ENSSSCT00000004030	150413	151353	147687	159290	143323	153322	147391	152105	154302	160844	152543	152746	166045	147310	172509	188580	174743	163292	149839	17.2076	17.1722	17.2813	17.1289	17.1693	17.2147	17.2354	17.2953	17.2189	17.2208	17.1685	17.3963	17.5248	17.4149	17.3171	17.1931	6	7	7	7	3	5	9
>ENSSSCP00000000082	6	1.08958	0.248353	1.16319	0.0818902	ADSL	Sus scrofa adenylosuccinate lyase (ADSL), mRNA. [Source:RefSeq mRNA;Acc:NM_001130733]|5|ENSSSCG00000000077|ENSSSCT00000000083	70672.7	82490.6	64354.8	63153	72692.5	77003.6	82608.4	79914	80042.2	70433.1	75632	73391.9	82205.8	86609.2	83726.1	79378.9	81130.8	78066.4	84323.5	16.3319	15.9738	15.9466	16.1495	16.334	16.2862	16.2885	16.104	16.2067	16.1633	16.4022	16.3534	16.2765	16.308	16.2524	16.3636	4	5	4	5	3	1	6
>ENSSSCP00000011592	5	0.910802	0.297363	0.856889	0.0649888	ADSS	adenylosuccinate synthetase isozyme 2 [Source:RefSeq peptide;Acc:NP_001090977]|10|ENSSSCG00000010874|ENSSSCT00000011896	73929.9	85645.6	66270.1	69460.9	74343	67335.5	81416.8	70851.3	73824.7	59987	68245.6	49687.5	63349.7	58851.2	64883.4	62600.1	64439.7	70255.8	59068.1	16.3861	16.0161	16.0839	16.1819	16.313	16.1125	16.1718	15.8724	16.0584	15.6006	15.8448	15.9856	15.9339	15.9757	16.1003	15.8501	4	3	3	3	1	1	4
>ENSSSCP00000004342	10	1.00341	0.9532	0.997464	0.941145	AFDN	myeloid/lymphoid or mixed-lineage leukemia (trithorax homolog, Drosophila); translocated to, 4 [Source:HGNC Symbol;Acc:7137]|1|ENSSSCG00000004018|ENSSSCT00000004443	119469	114775	114780	126128	122192	119876	105689	128463	126444	121524	120443	116691	119166	121805	117262	120776	112936	121283	120933	16.8084	16.8085	16.9445	16.8988	16.6895	16.971	16.9481	16.8909	16.878	16.8323	16.8942	16.8394	16.882	16.7851	16.888	16.8838	6	5	6	6	1	2	8
>ENSSSCP00000025028	7	0.997157	0.942899	1.05144	0.289836	AFG3L2	AFG3-like AAA ATPase 2 [Source:HGNC Symbol;Acc:315]|6|ENSSSCG00000022947|ENSSSCT00000025900	88318	86475.6	93329.8	82157.8	91308.6	88066.9	85005.7	88045.8	96191.7	85780.5	88751.4	84626.1	92860.8	99400.9	92613.5	79512	95414	93579.9	96644.5	16.4	16.5101	16.3261	16.4785	16.3753	16.426	16.5536	16.3884	16.4375	16.3688	16.601	16.4989	16.2789	16.5419	16.5139	16.5604	4	6	5	5	2	1	7
>ENSSSCP00000009550	4	1.09833	0.958045	0.866507	0.674554	AFP	Sus scrofa alpha-fetoprotein (AFP), mRNA. [Source:RefSeq mRNA;Acc:NM_214317]|8|ENSSSCG00000008949|ENSSSCT00000009803	58584.6	98362.9	46974.7	37790	51210.9	64345	137230	28941	50967.3	85961.1	22882.9	60087.6	50764	61461.6	67428.4	33640.2	57602.7	39955.5	44495.6	16.5858	15.5196	15.2057	15.6442	17.0662	14.8208	15.6373	16.3914	14.482	15.8748	15.9074	16.0411	15.0379	15.8138	15.2861	15.4414	4	2	2	2	5	1	4
>ENSSSCP00000017211	7	0.888587	0.245314	0.843814	0.192891	AGFG1	ArfGAP with FG repeats 1 [Source:HGNC Symbol;Acc:5175]|15|ENSSSCG00000016248|ENSSSCT00000017692	150914	156159	123023	165562	158910	134100	100302	146524	125892	165087	119446	147348	127343	77321	168373	101262	131636	164244	121223	17.2527	16.9086	17.337	17.2779	16.614	17.1608	16.9418	17.3329	16.866	17.1689	16.2386	17.3613	16.6277	17.0062	17.3255	16.8873	7	7	7	7	5	2	6
>ENSSSCP00000017474	3	0.931742	0.142292	0.911519	0.133181	AGK	acylglycerol kinase [Source:HGNC Symbol;Acc:21869]|18|ENSSSCG00000016492|ENSSSCT00000017956	65476.1	68457.4	66342.6	58989.5	68114.8	61006.8	62033.5	57762.1	63434.4	58055.1	59799.7	64956.2	59682.7	68841.8	66778.4	55422.8	52625.7	54398	60029.7	16.0629	16.0176	15.8482	16.0557	15.9208	15.8178	15.953	15.8251	15.8678	15.9872	16.071	16.0271	15.7582	15.6835	15.7313	15.8734	2	2	1	1	0	1	3
>ENSSSCP00000007326	45	1.06696	0.403738	1.19373	0.0758411	AGL	amylo-alpha-1, 6-glucosidase, 4-alpha-glucanotransferase [Source:HGNC Symbol;Acc:321]|4|ENSSSCG00000006872|ENSSSCT00000007525	1.30673e+06	1.54713e+06	1.16962e+06	1.14904e+06	1.36115e+06	1.39423e+06	1.37089e+06	1.29483e+06	1.53827e+06	1.30148e+06	1.47223e+06	1.38769e+06	1.55989e+06	1.58147e+06	1.61887e+06	1.50936e+06	1.56856e+06	1.48579e+06	1.5953e+06	20.5612	20.1576	20.132	20.3764	20.3867	20.3043	20.5529	20.3117	20.4896	20.4043	20.5928	20.6266	20.5255	20.581	20.5028	20.6054	26	33	25	27	14	15	40
>ENSSSCP00000025100	4	1.09945	0.229708	1.21707	0.0198741	AGPAT3	1-acylglycerol-3-phosphate O-acyltransferase 3 [Source:HGNC Symbol;Acc:326]|GL893611.1|ENSSSCG00000025285|ENSSSCT00000026028	61264.2	56670.6	55213.7	67518.4	65654.2	67357.1	62924.2	72156.3	71616.3	53798.1	73854.4	69793.5	74563	81608.9	74875.7	77629.5	66934.8	70394	75935	15.7903	15.7527	16.043	16.0026	15.9413	16.1388	16.128	15.7153	16.1724	16.0908	16.3164	16.1922	16.2443	16.0305	16.1032	16.2125	3	4	3	1	1	2	4
>ENSSSCP00000025135	6	1.09204	0.0269917	1.06901	0.158504	AGPS	alkylglycerone phosphate synthase [Source:HGNC Symbol;Acc:327]|15|ENSSSCG00000023983|ENSSSCT00000030764	76046.6	73927.5	77545.2	73690.6	79023.3	83046	90474.1	81494.4	83063.8	80108.4	87770.6	75364.4	81295	82523.3	71639.2	92357.8	85671.8	79353.4	76224.5	16.1738	16.2428	16.1692	16.27	16.4652	16.3144	16.3419	16.2897	16.4214	16.2016	16.3325	16.1285	16.4949	16.3865	16.276	16.218	5	4	4	3	1	2	5
>ENSSSCP00000007750	16	0.962129	0.293255	0.992705	0.807044	AHCY	Sus scrofa adenosylhomocysteinase (AHCY), mRNA. [Source:RefSeq mRNA;Acc:NM_001011727]|17|ENSSSCG00000007278|ENSSSCT00000007963	2.06242e+06	2.16291e+06	2011238	1.95826e+06	2.11725e+06	1.98431e+06	2.06036e+06	2.11939e+06	2.04537e+06	1.76009e+06	1.97329e+06	1.94737e+06	2.04737e+06	2.04824e+06	2.16297e+06	2.00975e+06	1.93788e+06	1.99463e+06	2.13077e+06	21.0445	20.9397	20.9011	21.0138	20.9745	21.0152	20.9639	20.7472	20.9122	20.8931	20.966	21.0446	20.9386	20.886	20.9277	21.0229	17	18	17	17	16	16	18
>ENSSSCP00000007271	5	1.07537	0.0140745	1.13622	0.00177992	AHCYL1	adenosylhomocysteinase-like 1 [Source:HGNC Symbol;Acc:344]|GL892439.2|ENSSSCG00000006816|ENSSSCT00000007467	144189	139017	146095	142271	149375	155056	145891	158408	150689	152628	161674	161048	163831	155565	173201	165090	168513	150433	170183	17.0849	17.1565	17.1183	17.1886	17.1545	17.2733	17.2012	17.2197	17.3027	17.2971	17.2472	17.4021	17.3329	17.3625	17.1988	17.3767	3	5	4	2	3	2	4
>ENSSSCP00000017552	7	1.0764	0.13743	1.25976	0.000151485	AHCYL2	adenosylhomocysteinase-like 2 [Source:HGNC Symbol;Acc:22204]|18|ENSSSCG00000016568|ENSSSCT00000018038	340258	333480	358973	327684	340895	366254	351764	310936	398987	366174	395866	373793	428643	423677	399137	455526	469467	427187	396865	18.3472	18.4535	18.3219	18.379	18.4242	18.2463	18.606	18.4822	18.5947	18.5119	18.6926	18.6065	18.7972	18.8407	18.7045	18.5983	13	14	13	12	11	11	13
>ENSSSCP00000019234	60	0.801247	0.000295873	0.861795	0.00435091	AHNAK	AHNAK nucleoprotein [Source:HGNC Symbol;Acc:347]|2|ENSSSCG00000027969|ENSSSCT00000029753	1.46014e+07	13690243	14513941	15346548	14854953	1.16993e+07	10639500	11949644	11469903	11804028	11341538	12991416	1.25834e+07	12143902	12287395	12943373	13976699	11273052	12876200	23.7066	23.7909	23.8714	23.8244	23.3429	23.5105	23.4513	23.4928	23.4351	23.6311	23.5337	23.5507	23.6257	23.7365	23.4264	23.6182	56	59	57	59	45	48	57
>ENSSSCP00000002608	13	0.892343	0.00155433	0.937583	0.024464	AHSA1	Uncharacterized protein [Source:UniProtKB/TrEMBL;Acc:F1SE06]|7|ENSSSCG00000002406|ENSSSCT00000002675	573096	586662	548475	566792	590456	511398	522093	496137	537653	505581	519240	487685	537325	547137	543806	567642	518994	529151	517223	19.1622	19.0651	19.1125	19.1715	18.9939	18.9204	19.0363	18.9476	18.986	18.8956	19.0615	19.0527	19.1146	18.9854	19.0133	18.9804	12	13	10	13	7	7	12
>ENSSSCP00000011551	2	0.992712	0.891894	0.975624	0.868116	AIDA	axin interactor, dorsalization associated [Source:HGNC Symbol;Acc:25761]|10|ENSSSCG00000010835|ENSSSCT00000011854	33108.1	22477.2	46662.8	33851.3	29440.9	32866.8	38824.2	30322.2	29522.4	30666.6	34116.5	33749	32301	45001.7	17794.5	25388.3	34057.2	41515	30049.5	14.4562	15.51	15.0469	14.8455	15.2447	14.8881	14.8495	14.9044	15.0582	15.0426	15.4577	14.1191	14.6319	15.0557	15.3413	14.8751	1	2	2	2	0	0	2
>ENSSSCP00000001497	4	1.18985	0.0182584	0.728826	0.00174045	AIF1	Sus scrofa allograft inflammatory factor 1 (AIF1), mRNA. [Source:RefSeq mRNA;Acc:NM_001129950]|7|ENSSSCG00000001408|ENSSSCT00000001539	55785.9	51347.1	57236.2	61740.3	52819.8	66377	70059.3	56709.3	62942.6	72834.6	71319.3	64396.9	40658.2	39858	34349.9	51091.3	39983.6	42215.7	36450.7	15.648	15.8046	15.9139	15.6888	16.0963	15.7913	15.9417	16.1523	16.122	15.9747	15.2826	15.068	15.6408	15.2871	15.3655	15.1537	4	4	2	3	2	2	4
>ENSSSCP00000022764	14	0.911903	0.00670268	0.901737	0.0150505	AIMP1	Sus scrofa aminoacyl tRNA synthetase complex-interacting multifunctional protein 1 (AIMP1), mRNA. [Source:RefSeq mRNA;Acc:NM_001114283]|8|ENSSSCG00000024168|ENSSSCT00000023345	865898	860020	862707	909158	831707	789615	765906	763481	795254	840036	776545	796467	780813	734791	886720	788184	766044	775065	734072	19.714	19.7185	19.7942	19.6657	19.5468	19.5422	19.6011	19.6801	19.5667	19.6033	19.487	19.7581	19.5882	19.5471	19.564	19.4856	13	12	12	14	6	11	12
>ENSSSCP00000026614	6	1.25156	0.00160234	1.30098	0.000935684	AIMP2	aminoacyl tRNA synthetase complex-interacting multifunctional protein 2 [Source:HGNC Symbol;Acc:20609]|3|ENSSSCG00000024245|ENSSSCT00000026197	213788	203102	234686	213178	204185	267568	301196	248477	258943	262460	251195	283139	278134	297260	293805	266338	264526	274250	272624	17.6318	17.8404	17.7017	17.6395	18.2003	17.9228	17.9823	18.0017	17.9384	18.1112	18.1814	18.1645	18.0229	18.0131	18.0651	18.0566	6	6	6	5	4	3	6
>ENSSSCP00000013721	6	0.901292	0.0879436	0.837924	0.0157407	AIP	aryl hydrocarbon receptor interacting protein [Source:HGNC Symbol;Acc:358]|2|ENSSSCG00000012904|ENSSSCT00000014107	135068	128593	134211	145256	132214	121736	105719	119436	134446	142458	107057	121300	113177	90583.5	121791	120450	114884	127298	104056	16.9724	17.0341	17.1482	17.0125	16.6899	16.8659	17.0367	17.1202	16.708	16.8882	16.467	16.894	16.8781	16.8098	16.9579	16.667	5	4	5	4	2	4	4
>ENSSSCP00000006028	4	0.966419	0.718556	1.02363	0.922979	AK1	Adenylate kinase isoenzyme 1 [Source:UniProtKB/Swiss-Prot;Acc:P00571]|1|ENSSSCG00000005627|ENSSSCT00000006187	60449.1	50718.7	57443.8	72069.8	61564.1	58419.1	50970.8	45374.7	66834.4	70900.6	59577.8	56856.4	61877.3	41471.9	59001.6	71178.1	72929.6	72675.1	54007.4	15.6302	15.8099	16.1371	15.9098	15.6374	15.4696	16.0283	16.1135	15.8625	15.795	15.3398	15.8485	16.1191	16.1542	16.1492	15.7209	3	5	4	4	1	2	4
>ENSSSCP00000027076	11	0.85837	0.0156786	0.847665	0.0118185	AK2	adenylate kinase 2 [Source:HGNC Symbol;Acc:362]|GL894826.2|ENSSSCG00000024355|ENSSSCT00000030814	618501	586215	577656	676902	633229	530902	479906	537890	544145	565153	527508	530809	524282	453665	510032	540148	523615	548884	569344	19.1611	19.1399	19.3686	19.2724	18.8724	19.037	19.0536	19.1083	19.0088	19.0178	18.7913	18.9602	19.043	18.9981	19.0661	19.1189	8	11	10	9	6	7	9
>ENSSSCP00000027309	8	1.03487	0.483363	1.07052	0.0864991	AK3	adenylate kinase 3 [Source:HGNC Symbol;Acc:17376]|1|ENSSSCG00000023595|ENSSSCT00000027088	164341	167757	169390	160906	159310	170071	190744	161206	191556	161650	155349	159917	175930	196349	172368	188060	166115	166345	166341	17.356	17.37	17.2959	17.2815	17.5413	17.2985	17.5474	17.3025	17.2452	17.287	17.5831	17.3951	17.5208	17.3418	17.3438	17.3438	6	3	5	6	6	5	7
>ENSSSCP00000004420	60	0.965607	0.604014	0.975558	0.719011	AKAP12	A kinase (PRKA) anchor protein 12 [Source:HGNC Symbol;Acc:370]|1|ENSSSCG00000004091|ENSSSCT00000004522	4.2801e+06	3.81455e+06	4903440	4162255	4240136	4.13289e+06	3.65375e+06	4307298	4.23249e+06	4.17402e+06	4007919	4421857	4.17548e+06	3.98567e+06	3.82837e+06	4.05547e+06	4.48161e+06	4.78288e+06	3918876	21.8631	22.2254	21.9889	22.0157	21.8009	22.0384	22.0131	21.993	21.9344	22.0762	21.9264	21.8683	21.9514	22.0956	22.1894	21.902	44	56	52	51	33	44	52
>ENSSSCP00000014711	3	1.49626	0.0225999	1.37073	0.0805647	AKAP8L	A kinase (PRKA) anchor protein 8-like [Source:HGNC Symbol;Acc:29857]|2|ENSSSCG00000013838|ENSSSCT00000015116	7769.43	6080.04	10297.3	7335.6	7364.76	11625.1	12273.5	9026.18	13333.6	12826.6	9921.83	12368.9	10649.8	8367.92	7073.17	11455.3	13179.5	13520.6	10302.5	12.5699	13.33	12.8407	12.8464	13.5833	13.1399	13.7028	13.6468	13.2764	13.5944	13.0307	12.7881	13.4837	13.686	13.7229	13.3307	1	1	1	0	0	0	1
>ENSSSCP00000020540	15	0.85962	0.600453	0.977972	0.899985	AKR1A1	aldo-keto reductase family 1, member A1 (aldehyde reductase) [Source:HGNC Symbol;Acc:380]|GL895547.1|ENSSSCG00000029256|ENSSSCT00000030677	2.77474e+06	4457364	2.16715e+06	2.18034e+06	2.29412e+06	2.38522e+06	2.61774e+06	1.987e+06	2550132	2.42147e+06	2.36479e+06	2370205	2.71362e+06	2905526	3.14863e+06	2.78084e+06	2.54454e+06	2.44134e+06	2.46084e+06	22.0878	21.0474	21.0561	21.1295	21.3199	20.9222	21.2821	21.2075	21.1733	21.1766	21.4704	21.5863	21.4071	21.279	21.2192	21.2307	13	15	14	14	14	13	15
>ENSSSCP00000017525	18	0.969713	0.565413	1.0765	0.209729	AKR1B1	Sus scrofa aldose reductase (ALR2), mRNA. [Source:RefSeq mRNA;Acc:NM_001001539]|18|ENSSSCG00000016539|ENSSSCT00000018009	4.18986e+06	3.75599e+06	4.31457e+06	4.54515e+06	4.14372e+06	4.06296e+06	3940918	3579845	4.4164e+06	4.27905e+06	4.01268e+06	4.14888e+06	4.5104e+06	3.83885e+06	4.4982e+06	4.58433e+06	4.92052e+06	4.55051e+06	4669986	21.8408	22.0408	22.1159	21.9825	21.9101	21.7715	22.0744	22.0289	21.9361	21.9843	21.8722	22.1009	22.1283	22.2304	22.1176	22.155	20	21	20	20	17	16	21
>ENSSSCP00000003790	10	1.22327	0.00961228	1.22074	0.0160941	AKR7L	aldo-keto reductase family 7-like [Source:HGNC Symbol;Acc:24056]|6|ENSSSCG00000003491|ENSSSCT00000003878	533111	600287	491923	529179	511057	652139	647951	618270	717242	602558	658758	668058	650791	648201	664588	647875	671411	641097	631573	19.1953	18.9081	19.0134	18.9631	19.3055	19.2379	19.4521	19.2007	19.3294	19.3496	19.3061	19.3421	19.3054	19.3568	19.2902	19.2686	9	8	8	9	6	7	10
>ENSSSCP00000003466	2	1.0768	0.190396	1.04703	0.393696	AKT1S1	AKT1 substrate 1 (proline-rich) [Source:HGNC Symbol;Acc:28426]|6|ENSSSCG00000003194|ENSSSCT00000003549	44766.1	44379.9	47399.5	41158.7	46126.2	48204.1	42935.2	51413.7	50386.4	48220.2	53723.6	42545.2	46871.3	50096	43569.9	50486.8	43876.2	41643.6	51555.2	15.4376	15.5326	15.3289	15.4933	15.3899	15.6499	15.6207	15.5573	15.7133	15.3767	15.6124	15.411	15.6236	15.4212	15.3458	15.6538	1	2	2	2	0	1	2
>ENSSSCP00000028033	2	0.882465	0.620785	1.38974	0.296645	AKTIP	AKT interacting protein [Source:HGNC Symbol;Acc:16710]|GL893684.1|ENSSSCG00000026181|ENSSSCT00000028038	10058.6	8636.49	15321.5	7247.69	9028.85	8876.39	10037.5	7564.48	9180.52	6968.19	10123.1	9384.51	13978.9	10068.2	27612.6	9275.64	10230.6	8970.23	17716.2	13.0762	13.9033	12.8233	13.1403	13.2931	12.885	13.1644	12.7666	13.3054	13.1961	13.2975	14.753	13.1792	13.3206	13.1309	14.1128	0	1	0	0	0	0	1
>ENSSSCP00000009549	8	0.95652	0.574604	1.30076	0.79779	ALB	albumin [Source:HGNC Symbol;Acc:399]|8|ENSSSCG00000008948|ENSSSCT00000009802	6.24776e+06	10810025	4602016	4728330	4850676	5.97611e+06	13156351	1.64884e+06	4290451	8761489	1.94771e+06	6051803	8.12682e+06	5.30331e+06	4.38621e+06	4.61355e+06	6293058	4.08822e+06	24076544	23.3659	22.1338	22.1729	22.2098	23.6493	20.653	22.0327	23.0627	20.8933	22.5289	22.3385	22.0645	22.1374	22.5853	21.963	24.5211	9	8	9	8	7	6	8
>ENSSSCP00000003435	11	1.15579	0.0282283	1.14561	0.039961	ALDH16A1	aldehyde dehydrogenase 16 family, member A1 [Source:HGNC Symbol;Acc:28114]|6|ENSSSCG00000003168|ENSSSCT00000003518	121623	109191	130947	118616	127740	140571	144459	143468	143748	121238	144883	145632	139333	142464	138405	142964	135731	140177	136256	16.7365	16.9986	16.8559	16.9628	17.1403	17.1304	17.1332	16.8875	17.1445	17.152	17.1202	17.0785	17.1253	17.0504	17.0969	17.056	5	9	7	7	2	4	8
>ENSSSCP00000011182	25	0.983323	0.577574	0.968344	0.417893	ALDH18A1	aldehyde dehydrogenase 18 family, member A1 [Source:HGNC Symbol;Acc:9722]|14|ENSSSCG00000010495|ENSSSCT00000011483	1.01022e+06	1.00761e+06	978578	1.0743e+06	980374	993368	1.03547e+06	979699	918051	1.02743e+06	1.03074e+06	968815	978236	1.05565e+06	898830	1091819	932411	988777	901929	19.9425	19.9003	20.035	19.903	19.9819	19.902	19.8082	19.9706	19.9752	19.8859	20.0097	19.7777	20.0583	19.8306	19.9153	19.7827	19	21	23	22	14	14	24
>ENSSSCP00000019521	3	1.06679	0.128629	1.17588	0.00268949	ALDH1A1	Uncharacterized protein [Source:UniProtKB/TrEMBL;Acc:I3L670]|2|ENSSSCG00000022795|ENSSSCT00000027284	611794	659055	587595	589334	611191	652653	720186	623664	666730	621150	675364	608826	719397	768341	729940	735911	699245	650386	732562	19.33	19.1645	19.1687	19.2213	19.458	19.2504	19.3467	19.2446	19.3653	19.2157	19.5514	19.4774	19.4892	19.4154	19.3109	19.4826	3	3	3	3	3	3	3
>ENSSSCP00000024476	3	1.05066	0.584501	0.970007	0.814664	ALDH1A2	aldehyde dehydrogenase 1 family, member A2 [Source:HGNC Symbol;Acc:15472]|1|ENSSSCG00000025578|ENSSSCT00000027950	141542	161955	122980	112875	168360	148713	161698	131316	148123	151838	153335	145965	137297	147105	180396	142221	112677	133445	107939	17.3052	16.9081	16.7844	17.3612	17.3029	17.0027	17.1764	17.2122	17.2263	17.1553	17.1665	17.4608	17.1178	16.7818	17.0259	16.7199	3	3	2	2	1	3	3
>ENSSSCP00000010556	17	1.04765	0.416286	1.1792	0.00146139	ALDH2	Sus scrofa aldehyde dehydrogenase 2 family (mitochondrial) (ALDH2), nuclear gene encoding mitochondrial protein, mRNA. [Source:RefSeq mRNA;Acc:NM_001044611]|14|ENSSSCG00000009889|ENSSSCT00000010839	1.65593e+06	1.56524e+06	1.69892e+06	1.64669e+06	1.71287e+06	1.73483e+06	1.65064e+06	1.47288e+06	2028900	1.83212e+06	1766769	1.65768e+06	1.95267e+06	1.99411e+06	1.80045e+06	2.15107e+06	2.02548e+06	1.92857e+06	1.81634e+06	20.578	20.6962	20.6511	20.708	20.6546	20.4902	20.9523	20.8051	20.7527	20.6607	20.9273	20.7799	21.0366	20.9498	20.8791	20.7926	19	21	19	20	18	18	20
>ENSSSCP00000019116	13	1.01752	0.677828	1.22931	0.00131877	ALDH3A2	aldehyde dehydrogenase 3 family, member A2 [Source:HGNC Symbol;Acc:403]|12|ENSSSCG00000018041|ENSSSCT00000019636	1.53186e+06	1.65462e+06	1.46936e+06	1.45127e+06	1552168	1.5587e+06	1.51302e+06	1.4849e+06	1.70849e+06	1.44662e+06	1.63677e+06	1.56241e+06	1.88312e+06	1951199	1.79329e+06	2017591	1.98276e+06	1.7518e+06	1.80209e+06	20.6581	20.4868	20.4689	20.5659	20.529	20.5019	20.7043	20.4643	20.6424	20.5753	20.8959	20.7742	20.9442	20.9191	20.7404	20.7812	14	14	13	14	13	13	14
>ENSSSCP00000025588	10	0.999382	0.95523	1.07456	0.196986	ALDH4A1	aldehyde dehydrogenase 4 family, member A1 [Source:HGNC Symbol;Acc:406]|6|ENSSSCG00000024752|ENSSSCT00000022352	256542	259973	261722	245855	258617	256383	269997	235571	268886	264096	253152	246598	275669	292701	229800	303614	295718	279591	252591	17.988	17.9977	17.9074	17.9805	18.0426	17.8458	18.0366	18.0107	17.9496	17.9118	18.1591	17.81	18.2119	18.1739	18.093	17.9464	6	10	8	7	6	6	12
>ENSSSCP00000001161	8	1.08086	0.288724	1.06828	0.235521	ALDH5A1	aldehyde dehydrogenase 5 family, member A1 [Source:HGNC Symbol;Acc:408]|7|ENSSSCG00000001090|ENSSSCT00000001186	136566	130655	138021	144749	132837	147609	128315	119584	152505	173360	156466	155422	145891	134124	145308	164559	155894	151639	123820	16.9954	17.0745	17.1432	17.0193	16.9693	16.8677	17.2185	17.4034	17.2555	17.2458	17.0332	17.1488	17.3282	17.2502	17.2103	16.9179	3	5	4	3	1	2	6
>ENSSSCP00000002556	12	1.16772	0.0694182	1.13305	0.179034	ALDH6A1	aldehyde dehydrogenase 6 family, member A1 [Source:HGNC Symbol;Acc:7179]|7|ENSSSCG00000002357|ENSSSCT00000002621	160618	140897	180863	166727	153984	187557	194674	152649	199840	205177	201575	171425	181989	179167	140706	212968	207234	182683	169175	17.1043	17.4645	17.3471	17.2324	17.5707	17.2199	17.6085	17.6465	17.621	17.3872	17.4509	17.1023	17.7003	17.6609	17.479	17.3682	4	7	9	6	3	3	12
>ENSSSCP00000015155	18	0.96494	0.641181	1.03474	0.653152	ALDH7A1	aldehyde dehydrogenase 7 family, member A1 [Source:HGNC Symbol;Acc:877]|2|ENSSSCG00000014247|ENSSSCT00000015567	1.89907e+06	2.23616e+06	1.73793e+06	1.75131e+06	1.87087e+06	1.83249e+06	1.91864e+06	1.75356e+06	1.95372e+06	1.7047e+06	1822021	1.84227e+06	1.96504e+06	1.9842e+06	2.29511e+06	1.93956e+06	1.70726e+06	1.77523e+06	2.08889e+06	21.0926	20.7289	20.74	20.8353	20.8717	20.7419	20.8978	20.7011	20.7971	20.8131	20.9201	21.1301	20.8873	20.7033	20.7596	20.9943	14	15	13	15	12	14	17
>ENSSSCP00000006743	18	1.0369	0.387855	1.04532	0.277921	ALDH9A1	aldehyde dehydrogenase 9 family, member A1 [Source:HGNC Symbol;Acc:412]|4|ENSSSCG00000006324|ENSSSCT00000006932	2529400	2770400	2.41954e+06	2481467	2.44619e+06	2.62273e+06	2.66433e+06	2.48773e+06	2.79966e+06	2.58605e+06	2772145	2.42645e+06	2.64403e+06	2563272	2.70174e+06	2863655	2.65591e+06	2.48218e+06	2597416	21.4017	21.2063	21.2428	21.2221	21.3453	21.2464	21.4168	21.3023	21.4026	21.2104	21.2896	21.3655	21.4494	21.3408	21.2432	21.3086	17	17	17	16	17	15	18
>ENSSSCP00000018818	26	0.959928	0.60558	1.07033	0.490927	ALDOC	Sus scrofa aldolase C, fructose-bisphosphate (ALDOC), mRNA. [Source:RefSeq mRNA;Acc:NM_001243928]|12|ENSSSCG00000017759|ENSSSCT00000019331	1.45414e+07	14969241	13622087	16811492	12762949	1.39587e+07	11861404	12923435	14506432	15336595	14118343	15006257	1.55642e+07	12183636	17078548	18258382	16990054	15447528	13426952	23.8355	23.6994	24.0029	23.6055	23.4998	23.6235	23.7902	23.8705	23.7511	23.8391	23.5384	24.0257	24.1221	24.0182	23.8809	23.6786	27	28	28	27	25	26	27
>ENSSSCP00000021023	2	0.985615	0.879114	1.2821	0.135382	ALG9	Uncharacterized protein [Source:UniProtKB/TrEMBL;Acc:I3LAF5]|9|ENSSSCG00000022950|ENSSSCT00000024052	7926.63	5357.33	8187.93	7950.26	10211	7812.61	9951.04	9453.4	8174.81	3989.43	6760.71	8546.26	10162.7	8973.61	10061.3	9249.78	10246	12015.9	10429.9	12.3873	12.9993	12.9568	13.3178	13.2806	13.2066	12.997	11.962	12.723	13.0611	13.1315	13.2965	13.1752	13.3228	13.5527	13.3484	0	1	1	1	0	0	1
>ENSSSCP00000017819	4	1.03071	0.737465	1.08649	0.412288	AMACR	alpha-methylacyl-CoA racemase [Source:HGNC Symbol;Acc:451]|16|ENSSSCG00000016822|ENSSSCT00000018315	58196.3	74929.5	49207.5	48748.1	59900.2	59983.4	53470.8	59462	61492.8	72410.4	61160.2	51904.4	63229.5	68275.8	61177.5	60753.5	62422.7	59311.9	67435.9	16.1932	15.5866	15.5731	15.8703	15.7065	15.8597	15.9081	16.1439	15.9003	15.6636	16.0591	15.9007	15.8907	15.9298	15.856	16.0412	2	3	2	3	1	0	4
>ENSSSCP00000008605	6	0.97089	0.434728	1.04758	0.217765	AMDHD2	N-acetylglucosamine-6-phosphate deacetylase [Source:UniProtKB/TrEMBL;Acc:F1SUH7]|3|ENSSSCG00000008057|ENSSSCT00000008829	135989	128291	135201	145270	135194	132031	131315	129404	130890	128520	149134	122921	142459	130234	145527	151688	148631	138241	140435	16.9691	17.0448	17.1484	17.0447	17.0027	16.9815	16.998	16.9716	17.1862	16.9074	16.9907	17.1509	17.2107	17.1814	17.0768	17.0995	3	4	4	3	1	2	6
>ENSSSCP00000021744	3	0.850061	0.401072	0.709503	0.133564	AMPD3	adenosine monophosphate deaminase 3 [Source:HGNC Symbol;Acc:470]|2|ENSSSCG00000022492|ENSSSCT00000026707	33065.1	26554.3	24393.7	36619.4	44693.2	28107.4	31221	22985	37857.8	25878.4	23519.5	27182.5	23459.8	29118.6	9502.48	25218.8	32251.7	20934	23733.3	14.6967	14.5742	15.1603	15.4478	14.9302	14.4884	15.2083	14.6595	14.5216	14.7304	14.8297	13.2141	14.6222	14.9771	14.3536	14.5346	1	1	1	0	0	0	2
>ENSSSCP00000020487	2	1.08799	0.391251	1.09051	0.4162	AMPH	amphiphysin [Source:HGNC Symbol;Acc:471]|9|ENSSSCG00000024136|ENSSSCT00000023536	14831.8	11454.4	16551.8	15168.7	16152.3	16136.8	14582.2	14469.9	16587.6	18478.3	14989.4	17713.3	16174.2	14397.4	12839.1	17947	16772.1	16877.7	18211.8	13.4836	14.0147	13.8888	13.9795	13.8319	13.8208	14.0178	14.1735	13.8717	14.1125	13.8135	13.6483	14.1315	14.0338	14.0428	14.1526	1	2	1	1	0	1	2
>ENSSSCP00000009731	23	1.09783	0.00534005	1.15696	0.00883481	ANK2	ankyrin 2, neuronal [Source:HGNC Symbol;Acc:493]|8|ENSSSCG00000009125|ENSSSCT00000009992	447361	440374	470735	438482	439852	491128	485212	476309	503380	503681	481905	496278	517577	530746	432159	525754	543932	531146	541726	18.7484	18.8446	18.7422	18.7467	18.8883	18.8615	18.9413	18.9422	18.8784	18.9208	19.0177	18.7212	19.004	19.0531	19.0187	19.0472	12	19	14	14	5	8	20
>ENSSSCP00000018937	23	0.899501	0.114719	0.923417	0.206321	ANKFY1	Uncharacterized protein [Source:UniProtKB/TrEMBL;Acc:F1RGQ6]|12|ENSSSCG00000017877|ENSSSCT00000019454	560922	583127	497770	553188	609604	504550	488996	529462	475511	449902	598576	484853	517965	610525	483201	539750	496528	479478	498308	19.1534	18.9251	19.0774	19.2175	18.8995	19.0142	18.8591	18.7793	19.1912	18.8872	19.2197	18.8823	19.0419	18.9215	18.8711	18.9267	14	14	13	13	9	10	20
>ENSSSCP00000020560	2	1.96647	0.107872	1.2688	0.720734	ANKMY2	Sus scrofa ankyrin repeat and MYND domain containing 2 (ANKMY2), mRNA. [Source:RefSeq mRNA;Acc:NM_001243401]|GL892750.2|ENSSSCG00000026258|ENSSSCT00000029043	18130.9	23380.1	14516.4	19943.1	14683.8	35653.8	16061.6	15499.9	53853.9	53340.8	55822.7	19343.8	23004.4	20352.1	58893.2	13825.6	14343.6	16087	14525.2	14.513	13.8254	14.2836	13.8419	13.9713	13.92	15.7168	15.703	15.7686	14.2396	14.3129	15.8458	13.755	13.8081	13.9736	13.8263	1	2	1	2	0	1	2
>ENSSSCP00000010590	2	1.32762	0.255127	0.986675	0.876205	ANKRD13A	|14|ENSSSCG00000009924|ENSSSCT00000010875	12141.3	7007.65	12570.5	17859.3	11127.9	16119.1	16301	20310	17151.9	17054.5	17908.4	7988.69	11979.5	11535.3	14446.6	11834.5	12144.7	12288.3	9627.96	12.7747	13.6177	14.1244	13.4419	13.9927	14.3099	14.0661	14.0579	14.1283	12.9637	13.4938	13.8184	13.5307	13.568	13.585	13.233	1	2	1	0	0	0	1
>ENSSSCP00000027093	3	0.839574	0.100516	0.799822	0.0394405	ANKRD17	Sus scrofa ankyrin repeat domain 17 (ANKRD17), mRNA. [Source:RefSeq mRNA;Acc:NM_001201383]|8|ENSSSCG00000024592|ENSSSCT00000028188	39212.4	41256.6	36729.6	38779.4	40083.7	32921.7	34662	30195.7	42260.7	34036.9	35413.3	20961.3	31362.9	36105.7	29549.8	36482.7	37341.5	26830.1	21867.6	15.3323	15.1647	15.243	15.2907	15.0811	14.8821	15.367	15.0548	15.112	14.3554	15.1399	14.8509	15.1549	15.1885	14.7116	14.4165	0	3	3	1	0	0	3
>ENSSSCP00000017029	2	1.18616	0.0753694	1.16487	0.434531	ANKRD44	Uncharacterized protein [Source:UniProtKB/TrEMBL;Acc:F1SN09]|15|ENSSSCG00000016074|ENSSSCT00000017501	12527.3	12381.9	11737.5	12868.8	13121.1	14859.5	17075.4	14538	16182.4	13530	10881.7	16949.3	14592.7	14040.9	8381.63	20341.4	17654.2	11306.7	15831.3	13.5959	13.5188	13.6516	13.6796	14.0596	13.8275	13.9821	13.7239	13.4096	14.0489	13.7773	13.033	14.3121	14.1077	13.4649	13.9505	1	1	1	0	0	0	3
>ENSSSCP00000012043	6	1.02947	0.618228	1.0691	0.274229	ANO10	Anoctamin [Source:UniProtKB/TrEMBL;Acc:F1SRD2]|13|ENSSSCG00000011296|ENSSSCT00000012366	98266.8	107828	88129	93737.7	103373	101163	102951	106453	112413	89566	99453.7	96138.5	105057	119052	109280	99633.5	102299	95220.5	104855	16.7184	16.4273	16.5163	16.6575	16.6516	16.6999	16.7785	16.4507	16.6017	16.5528	16.8612	16.7377	16.6043	16.6424	16.539	16.678	4	4	4	4	2	2	6
>ENSSSCP00000000856	5	0.748284	0.023878	0.696366	0.00304	ANO6	anoctamin 6 [Source:HGNC Symbol;Acc:25240]|5|ENSSSCG00000000804|ENSSSCT00000000873	88394.7	88043	79232.6	88350.5	97952.6	66144.4	57652.4	77660.5	63448.2	43616.2	68738.2	85750.8	61555	61075.3	43496.3	76239.9	64844.4	60646.2	63028.1	16.4259	16.2738	16.431	16.5798	15.8151	16.2449	15.9533	15.4126	16.0688	16.3879	15.8983	15.4086	16.2183	15.9847	15.8881	15.9437	3	1	2	3	0	2	4
>ENSSSCP00000005765	5	1.00045	0.987605	0.942905	0.176508	ANP32B	acidic (leucine-rich) nuclear phosphoprotein 32 family, member B [Source:HGNC Symbol;Acc:16677]|1|ENSSSCG00000005372|ENSSSCT00000005912	684241	697490	656890	713062	669520	684550	719092	615441	694387	693191	722105	663086	645174	690666	700565	697107	579290	586358	617057	19.4118	19.3253	19.4437	19.3528	19.4558	19.2313	19.4054	19.4029	19.4618	19.3388	19.3976	19.4182	19.411	19.1439	19.1614	19.235	5	5	5	5	5	4	5
>ENSSSCP00000007101	3	0.838094	0.434027	0.867242	0.519888	ANP32E	acidic (leucine-rich) nuclear phosphoprotein 32 family, member E [Source:HGNC Symbol;Acc:16673]|GL893677.1|ENSSSCG00000006659|ENSSSCT00000007296	96078.7	122938	119109	63179.2	79088.7	80523	81630.9	59050.1	104298	74479.2	94337.8	69342.1	83323.6	102638	101477	54977.1	72005.8	64883.1	103960	16.9076	16.8619	15.9472	16.2712	16.3168	15.8497	16.6704	16.1845	16.5255	16.0814	16.6472	16.6308	15.7465	16.1358	15.9856	16.6657	2	4	2	1	1	0	2
>ENSSSCP00000002023	3	1.17663	0.0581031	1.19343	0.0214349	ANPEP	Sus scrofa alanyl (membrane) aminopeptidase (ANPEP), mRNA. [Source:RefSeq mRNA;Acc:NM_214277]|7|ENSSSCG00000001849|ENSSSCT00000002072	1.92897e+06	1.77757e+06	2.08213e+06	1.77022e+06	2.08597e+06	2.26969e+06	2.84999e+06	2.32436e+06	2.29291e+06	1.98219e+06	2.0013e+06	2.1674e+06	2.3021e+06	1996682	2300315	2.33067e+06	2.2434e+06	2.55216e+06	2.38935e+06	20.7615	20.9896	20.7555	20.9923	21.4425	21.1484	21.1287	20.9187	20.9325	21.0475	20.9292	21.1334	21.1523	21.0973	21.2833	21.1882	1	2	1	3	1	1	2
>ENSSSCP00000008903	2	1.3554	0.0334611	1.43188	0.0200256	ANTXR1	anthrax toxin receptor 1 [Source:HGNC Symbol;Acc:21014]|3|ENSSSCG00000008340|ENSSSCT00000009134	10319.2	9682.49	9918.43	8525.91	13150.1	13986.6	14155.6	14719.4	13933.8	12076.8	15757	13277.4	14775.9	15009.8	10187.9	15864.5	16950.6	15452.9	15189.8	13.2412	13.2759	13.0576	13.6828	13.7891	13.8454	13.7663	13.56	13.9437	13.6967	13.8736	13.3146	13.9535	14.049	13.9156	13.8908	1	1	1	1	0	0	2
>ENSSSCP00000005658	2	1.08419	0.132808	1.11427	0.0155497	ANXA1	annexin A1 [Source:HGNC Symbol;Acc:533]|1|ENSSSCG00000005267|ENSSSCT00000005802	4.41696e+06	4637017	4404241	4197743	4428854	4.78882e+06	5617806	4373786	5064676	4508263	4.81781e+06	4350579	4.92169e+06	5112405	4668606	5402678	4.98466e+06	4432745	4.92907e+06	22.1448	22.0705	22.0012	22.0785	22.4216	22.0605	22.272	22.1041	22.1999	22.0528	22.2856	22.1546	22.3652	22.2491	22.0798	22.2329	20	21	21	21	20	20	21
>ENSSSCP00000011017	4	1.00493	0.897371	0.960931	0.36963	ANXA11	Annexin [Source:UniProtKB/TrEMBL;Acc:F1S2E2]|14|ENSSSCG00000010331|ENSSSCT00000011309	299191	324529	295824	278533	297878	300665	330221	308539	298648	285356	289518	291704	287502	299120	321155	288719	268910	270796	276309	18.308	18.1744	18.0875	18.1844	18.3331	18.2351	18.1881	18.1224	18.1433	18.1541	18.1904	18.2929	18.1393	18.0368	18.0468	18.0759	17	19	18	19	17	17	19
>ENSSSCP00000004935	29	0.944468	0.501886	0.963106	0.658377	ANXA2	annexin A2 [Source:HGNC Symbol;Acc:537]|1|ENSSSCG00000004578|ENSSSCT00000005057	80251496	95906456	73942472	72539968	78617088	7.5795e+07	81690432	81330328	62624800	71315080	75510128	82299200	77290662	81669824	96839368	75806784	70598936	62557724	76271336	26.5151	26.1399	26.1123	26.2283	26.2837	26.2773	25.9002	26.0877	26.1702	26.2944	26.2833	26.5291	26.1758	26.0731	25.8987	26.1846	26	29	30	28	26	26	28
>ENSSSCP00000008898	13	1.10253	0.187566	1.13904	0.109276	ANXA4	Sus scrofa annexin A4 (ANXA4), mRNA. [Source:RefSeq mRNA;Acc:NM_001167639]|3|ENSSSCG00000008336|ENSSSCT00000009128	402151	471559	358933	379592	398520	443385	482711	435756	420115	430349	475354	416023	458065	467096	490053	504064	452061	397907	437208	18.8471	18.4534	18.5341	18.6043	18.8808	18.7332	18.6804	18.7151	18.8586	18.6663	18.8334	18.9026	18.9432	18.7862	18.6021	18.738	11	9	11	11	12	11	13
>ENSSSCP00000009706	18	0.958953	0.388081	0.968543	0.549448	ANXA5	annexin A5 [Source:HGNC Symbol;Acc:543]|8|ENSSSCG00000009097|ENSSSCT00000009963	45475370	50629652	42708036	44905788	43658004	4.36087e+07	47603888	44120520	41906836	43042756	43291400	41687048	44044854	48898916	48217524	44618840	41610056	38788056	42135732	25.5935	25.348	25.4204	25.3797	25.5046	25.3949	25.3207	25.3593	25.3676	25.3131	25.5433	25.5231	25.4111	25.3104	25.2091	25.3285	17	18	17	18	16	16	18
>ENSSSCP00000018106	7	0.894987	0.252014	0.935675	0.487707	ANXA6	Annexin [Source:UniProtKB/TrEMBL;Acc:F1S0V2]|16|ENSSSCG00000017090|ENSSSCT00000018607	1.45614e+06	1.74385e+06	1.25988e+06	1.31968e+06	1501140	1.30322e+06	1.39725e+06	1.28478e+06	1.39684e+06	1231265	1.28256e+06	1.22664e+06	1.36247e+06	1.39588e+06	1.50595e+06	1.39487e+06	1.20668e+06	1.21426e+06	1.45718e+06	20.7338	20.2649	20.3318	20.5176	20.4142	20.2931	20.4137	20.2317	20.2906	20.2263	20.4127	20.5222	20.4117	20.2026	20.2116	20.4748	7	7	7	7	7	7	7
>ENSSSCP00000011058	17	0.612526	7.52322e-05	0.551261	2.37553e-05	ANXA8	Sus scrofa annexin A8 (ANXA8), mRNA. [Source:RefSeq mRNA;Acc:NM_001243599]|14|ENSSSCG00000010370|ENSSSCT00000011352	1.7028e+06	1.85889e+06	1.68303e+06	1.50623e+06	1.76305e+06	1.04301e+06	1.08427e+06	1.25672e+06	979253	923169	1.02351e+06	991132	938688	980476	1.071e+06	924006	808247	801282	1.04712e+06	20.826	20.6826	20.5225	20.7496	20.0483	20.2612	19.9013	19.8162	19.9651	19.9187	19.9031	20.0305	19.8175	19.6244	19.612	19.998	17	18	16	18	19	14	18
>ENSSSCP00000002957	19	0.990629	0.873286	1.09934	0.105672	AP1G1	Uncharacterized protein [Source:UniProtKB/TrEMBL;Acc:F1S3C7]|6|ENSSSCG00000002740|ENSSSCT00000003036	416315	451167	400922	373927	439244	412414	397230	419940	430685	363355	435947	427327	457673	468392	449818	445471	442567	456676	483116	18.7833	18.613	18.5124	18.7447	18.5996	18.6798	18.7163	18.471	18.7338	18.705	18.8374	18.779	18.765	18.7555	18.8008	18.882	15	17	13	15	9	12	17
>ENSSSCP00000014730	10	0.979118	0.659757	1.10461	0.0551233	AP1M1	adaptor-related protein complex 1, mu 1 subunit [Source:HGNC Symbol;Acc:13667]|2|ENSSSCG00000013856|ENSSSCT00000015135	208239	206554	210822	192453	223125	203890	223728	205635	215514	178897	223086	176482	230023	207277	220208	226408	238237	228623	259386	17.6562	17.6857	17.5541	17.7675	17.7714	17.6497	17.7174	17.4488	17.7672	17.4292	17.6612	17.7485	17.7886	17.862	17.8026	17.9847	8	13	11	12	2	4	14
>ENSSSCP00000028070	2	0.97544	0.809433	0.925519	0.451762	AP1S1	adaptor-related protein complex 1, sigma 1 subunit [Source:HGNC Symbol;Acc:559]|GL894574.1|ENSSSCG00000021145|ENSSSCT00000032579	26720.8	21781.7	30866.6	25347.2	28887.7	26064.5	26216.3	29958.4	26069.1	20549.5	23962.5	29631.3	24730.6	26815.1	22801.4	20080.8	26157.9	29128.2	23400.3	14.4108	14.9138	14.6295	14.8182	14.6782	14.8707	14.6701	14.3268	14.5485	14.8548	14.7108	14.4768	14.2935	14.675	14.8301	14.5142	1	2	2	2	1	0	2
>ENSSSCP00000013646	21	1.06655	0.355699	1.18155	0.0645185	AP2A2	adaptor-related protein complex 2, alpha 2 subunit [Source:HGNC Symbol;Acc:562]|2|ENSSSCG00000012836|ENSSSCT00000014031	509438	590167	462787	453136	531663	543342	539825	543309	588914	500236	539254	548515	601929	587588	622562	586609	574581	591099	649134	19.1708	18.82	18.7896	19.0202	19.0421	19.0514	19.1677	18.9322	19.0406	19.0652	19.1644	19.2479	19.162	19.1322	19.173	19.3082	17	19	14	15	12	11	18
>ENSSSCP00000019788	5	0.952776	0.449087	0.937675	0.324416	AP2B1	Sus scrofa adaptor-related protein complex 2, beta 1 subunit (AP2B1), mRNA. [Source:RefSeq mRNA;Acc:NM_001243183]|GL892959.1|ENSSSCG00000024434|ENSSSCT00000025334	646588	710110	561576	644295	670368	616053	618642	648447	671967	580558	602546	574158	606289	650737	622080	561092	579497	570325	654005	19.4377	19.0991	19.2974	19.3546	19.2387	19.3066	19.358	19.1471	19.2007	19.1311	19.3117	19.2467	19.0979	19.1444	19.1214	19.3189	19	19	19	19	19	18	19
>ENSSSCP00000024773	17	1.07065	0.268488	1.14678	0.0503391	AP2M1	adaptor-related protein complex 2, mu 1 subunit [Source:HGNC Symbol;Acc:564]|13|ENSSSCG00000024437|ENSSSCT00000030395	1.10352e+06	1.20467e+06	1.11007e+06	965937	1.13337e+06	1.18148e+06	1.28303e+06	1.20919e+06	1204439	1.03649e+06	1.23546e+06	1.12025e+06	1.26549e+06	1.2463e+06	1.25518e+06	1.23611e+06	1.27394e+06	1.19983e+06	1.38161e+06	20.2002	20.0822	19.8816	20.1122	20.2911	20.2056	20.1999	19.9833	20.2366	20.0954	20.2492	20.2595	20.2374	20.2809	20.1944	20.3979	16	17	17	15	14	12	16
>ENSSSCP00000014994	13	1.04761	0.492366	1.09109	0.264275	AP3B1	Uncharacterized protein [Source:UniProtKB/TrEMBL;Acc:F1S2G1]|2|ENSSSCG00000014101|ENSSSCT00000015403	452889	543510	399436	421819	446791	474449	485062	488427	456638	451327	488763	476480	494143	519674	529694	463497	471747	488821	491425	19.0519	18.6076	18.6863	18.7692	18.8878	18.8978	18.8007	18.7838	18.8988	18.8621	18.9872	19.0148	18.8222	18.8477	18.8989	18.9066	10	12	12	11	7	9	12
>ENSSSCP00000014304	2	1.35956	0.32631	1.07465	0.585429	AP3D1	|2|ENSSSCG00000013456|ENSSSCT00000014700	87002.8	22491.8	88988.8	111988	124542	118286	108157	118038	162350	114441	122468	84258.5	93497.5	112855	75292	96894.8	101534	88742.2	85667.6	14.4571	16.4413	16.773	16.9263	16.7228	16.8489	17.3088	16.8042	16.902	16.3625	16.7841	16.2002	16.5641	16.6316	16.4373	16.3865	1	2	1	1	0	0	2
>ENSSSCP00000010999	9	0.874103	0.301073	0.964602	0.760029	AP3M1	adaptor-related protein complex 3, mu 1 subunit [Source:HGNC Symbol;Acc:569]|14|ENSSSCG00000010314|ENSSSCT00000011291	236186	301670	199068	240810	203194	206450	226548	186590	225360	237932	175177	187095	227825	327876	230504	177054	208021	214292	209206	18.2026	17.6029	17.8775	17.6325	17.7895	17.5095	17.7819	17.8602	17.4185	17.5134	18.3228	17.8144	17.4338	17.6664	17.7092	17.6746	7	9	8	7	6	2	12
>ENSSSCP00000024872	4	1.10405	0.520026	0.892836	0.371522	AP3S2	adaptor-related protein complex 3, sigma 2 subunit [Source:HGNC Symbol;Acc:571]|7|ENSSSCG00000030174|ENSSSCT00000025884	28572.2	22068.9	28283.6	29886.1	34050.1	31545	23460.9	31384.2	37972.5	35936.4	37758.7	22757.2	25510.3	23611.5	22239.6	34309.5	24705.3	29891.1	18304.7	14.4297	14.7877	14.8672	15.0554	14.518	14.9378	15.2127	15.1332	15.2045	14.474	14.5272	14.4408	15.0663	14.5925	14.8674	14.1599	2	2	2	1	0	0	2
>ENSSSCP00000012138	2	0.993438	0.844244	1.11178	0.0141003	APEH	Sus scrofa N-acylaminoacyl-peptide hydrolase (APEH), mRNA. [Source:RefSeq mRNA;Acc:NM_213923]|13|ENSSSCG00000011385|ENSSSCT00000012463	69372.7	73835.2	66100.7	70447.4	67107.7	68917.5	77227.6	67595.4	64602.9	64780.5	69559.8	69739	77127.3	77894.6	78435.4	80244.4	75553.7	79480.9	71154.6	16.172	16.0124	16.1043	16.0342	16.2368	16.0446	15.9793	15.9833	16.086	16.0897	16.2492	16.2592	16.2921	16.2052	16.2783	16.1187	11	13	13	10	10	8	13
>ENSSSCP00000002335	12	1.00156	0.927877	1.07603	0.296373	APEX1	APEX nuclease (multifunctional DNA repair enzyme) 1 [Source:HGNC Symbol;Acc:587]|7|ENSSSCG00000002137|ENSSSCT00000002390	1.72872e+06	1958441	1.65704e+06	1.49286e+06	1806530	1.73141e+06	1.76142e+06	1.805e+06	1721354	1.63118e+06	1666883	1.80262e+06	1860147	1.93227e+06	2.05218e+06	1.71447e+06	1.77181e+06	1.77749e+06	1.91266e+06	20.9013	20.6602	20.5097	20.7848	20.7483	20.7836	20.7151	20.6375	20.6687	20.7817	20.8819	20.9687	20.7093	20.7568	20.7614	20.8671	12	12	12	12	11	12	12
>ENSSSCP00000014117	11	0.82129	0.779829	1.24022	0.801997	API5	apoptosis inhibitor 5 [Source:HGNC Symbol;Acc:594]|2|ENSSSCG00000013285|ENSSSCT00000014509	594818	1488625	291956	293442	305249	488518	305906	299531	315913	272130	1.45042e+06	287206	737703	290487	290440	1572011	275220	288865	1.70919e+06	20.5055	18.1554	18.1627	18.2196	18.2227	18.1923	18.2692	18.0539	20.468	18.1317	18.1481	18.1479	20.5842	18.0702	18.14	20.7049	8	9	9	9	5	6	10
>ENSSSCP00000014132	6	1.08162	0.346658	1.03937	0.852423	APIP	APAF1 interacting protein [Source:HGNC Symbol;Acc:17581]|2|ENSSSCG00000013299|ENSSSCT00000014525	287953	270215	302038	329868	249692	311456	280086	327523	269204	342337	292498	357089	299290	182999	361033	288599	325020	328658	309428	18.0437	18.2044	18.3315	17.9298	18.0955	18.3212	18.0383	18.3851	18.1581	18.4459	17.4815	18.4618	18.1387	18.3102	18.3262	18.2392	4	5	6	4	3	3	5
>ENSSSCP00000016168	4	0.842245	0.150459	0.727255	0.0244872	APLP2	Uncharacterized protein [Source:UniProtKB/TrEMBL;Acc:F1S6E8]|9|ENSSSCG00000015244|ENSSSCT00000016613	93382.8	113929	94036.5	75060.1	90505.2	78651.1	70644	71932.1	91800.6	75013.2	77880	84636.9	67913.1	80418.9	71216.6	70055.4	59435.1	57455.1	68897.2	16.7978	16.5209	16.1958	16.4657	16.1083	16.1343	16.4862	16.1949	16.249	16.369	16.2952	16.1199	16.0962	15.859	15.8101	16.0722	3	4	2	3	2	2	4
>ENSSSCP00000007595	11	0.961836	0.276861	0.997499	0.926319	APMAP	Uncharacterized protein [Source:UniProtKB/TrEMBL;Acc:F1SAS3]|17|ENSSSCG00000007132|ENSSSCT00000007804	661297	682336	640576	633591	688684	636059	659328	617665	685635	630002	655687	568040	659643	669930	619761	711180	657084	635494	664411	19.3801	19.289	19.2732	19.3935	19.3306	19.2365	19.3871	19.265	19.3226	19.1156	19.3537	19.2414	19.4399	19.3257	19.2775	19.3417	15	17	17	17	13	12	17
>ENSSSCP00000015994	14	0.842217	0.369485	0.805802	0.260973	APOA1	Apolipoprotein A-I Truncated apolipoprotein A-I [Source:UniProtKB/Swiss-Prot;Acc:P18648]|9|ENSSSCG00000015070|ENSSSCT00000016436	1.59158e+06	2.29465e+06	1.24064e+06	1.50766e+06	1.32336e+06	1.34045e+06	1722855	982208	1.27412e+06	1.54302e+06	920356	1.60017e+06	1.28249e+06	1.06524e+06	1.77489e+06	1.22304e+06	1.06102e+06	1.14749e+06	1423291	21.1298	20.2427	20.5239	20.3358	20.7164	19.9057	20.2811	20.5573	19.8118	20.6098	20.0227	20.7593	20.222	20.017	20.13	20.4408	12	14	14	13	10	9	13
>ENSSSCP00000003343	2	0.907624	0.801769	0.466157	0.0222541	APOE	apolipoprotein E [Source:HGNC Symbol;Acc:613]|6|ENSSSCG00000003088|ENSSSCT00000003426	19528.1	31586	14717.9	13961.2	17847.2	17724.2	17937.1	15269.2	22554.8	13349.1	17653.9	19581	9103.16	7959.23	14139.5	3797.08	6136.87	5852.76	16733.5	14.947	13.8453	13.7691	14.1234	14.1307	13.8983	14.4611	13.7045	14.1077	14.2572	12.9584	13.7874	11.8907	12.5833	12.5149	14.0305	1	2	2	0	4	1	2
>ENSSSCP00000018294	3	0.958687	0.741691	1.08411	0.99035	APOH	|12|ENSSSCG00000017267|ENSSSCT00000018796	35644.1	51903.1	29500.5	25427.1	35745.7	34171.5	60238.8	16155.9	31296.7	37775.2	28987.6	30574.8	38642.2	29903.6	72867.8	23726	25308.3	20746	59301.7	15.6635	14.8485	14.6341	15.1255	15.8784	13.9798	14.9337	15.2052	14.8231	14.9001	14.868	16.153	14.5342	14.6273	14.3405	15.8558	2	2	1	1	3	2	3
>ENSSSCP00000012805	2	1.20931	0.0833236	1.00654	0.920839	APP	amyloid beta A4 protein [Source:RefSeq peptide;Acc:NP_999537]|13|ENSSSCG00000012022|ENSSSCT00000013154	11064.1	9644.13	11455.2	12236	10921.2	13380	9245.42	15409.5	12972	13830	15074.4	13748.6	11136.5	7993.7	9123.95	12187.3	13970.5	13567.7	9975.97	13.2354	13.4837	13.5788	13.4149	13.1745	13.9115	13.6631	13.7555	13.8798	13.747	12.9646	13.1554	13.5731	13.7701	13.7279	13.2842	2	7	4	3	1	2	5
>ENSSSCP00000000895	2	1.01491	0.878085	1.2801	0.176584	APPL2	Sus scrofa amyloid beta (A4) precursor-like protein 2 (APLP2), mRNA. [Source:RefSeq mRNA;Acc:NM_001135961]|5|ENSSSCG00000000841|ENSSSCT00000000915	37395.1	50800.4	43502.6	25476.9	29800.3	37952.7	27606.7	42922.1	37535.8	45939.7	45960.1	27751.6	47869.5	46114.4	50155.6	50363.3	53518.6	43506.7	43558.2	15.6326	15.4088	14.6369	14.863	14.7527	15.3894	15.196	15.4875	15.4881	14.7603	15.4929	15.6141	15.6201	15.7078	15.409	15.4107	1	1	1	1	1	1	1
>ENSSSCP00000002862	8	0.91995	0.153961	0.960661	0.544622	APRT	Uncharacterized protein [Source:UniProtKB/TrEMBL;Acc:F1S6K5]|6|ENSSSCG00000002650|ENSSSCT00000002941	401620	379262	366916	439937	420366	369471	351607	359107	353550	396651	359813	396097	385821	472092	440247	379960	346987	350799	324841	18.5328	18.4851	18.7469	18.6813	18.4236	18.4541	18.4316	18.5975	18.4569	18.5955	18.8487	18.748	18.5355	18.4045	18.4203	18.3094	6	7	7	7	6	6	8
>ENSSSCP00000013063	3	1.09845	0.399598	1.04954	0.596454	ARAF	Sus scrofa v-raf murine sarcoma 3611 viral oncogene homolog (ARAF), mRNA. [Source:RefSeq mRNA;Acc:NM_214329]|X|ENSSSCG00000012275|ENSSSCT00000013423	13329.3	13756.6	15859.1	10926.7	12774.7	14641.6	16958.9	12086.4	13248.7	15325.1	17758.5	12471.7	13989.6	13154.4	11369.9	15208	14163.9	15965.6	14076.1	13.7478	13.953	13.4156	13.641	14.0498	13.5611	13.6936	13.9036	14.1162	13.6064	13.6833	13.4729	13.8925	13.7899	13.9627	13.781	0	1	1	1	0	0	1
>ENSSSCP00000021552	22	0.87178	0.00482324	0.923515	0.0467494	ARCN1	archain 1 [Source:HGNC Symbol;Acc:649]|9|ENSSSCG00000030053|ENSSSCT00000028599	1.64102e+06	1.74373e+06	1.55922e+06	1.58903e+06	1.6721e+06	1.43061e+06	1.48091e+06	1451160	1.49891e+06	1.33632e+06	1.40803e+06	1408318	1.51551e+06	1531326	1.53899e+06	1618775	1.41507e+06	1438822	1550053	20.7337	20.5724	20.5997	20.6732	20.4981	20.4688	20.5155	20.3498	20.4252	20.4255	20.5464	20.5535	20.6265	20.4324	20.4565	20.5639	22	21	21	21	20	19	23
>ENSSSCP00000014877	4	1.02676	0.500957	1.07756	0.126671	ARF1	Sus scrofa ADP-ribosylation factor 1 (ARF1), mRNA. [Source:RefSeq mRNA;Acc:NM_001160427]|2|ENSSSCG00000013992|ENSSSCT00000015283	2824809	2994738	2897013	2.53603e+06	2.87146e+06	2.9004e+06	2.95231e+06	2.96163e+06	2.86955e+06	2.80228e+06	2.89108e+06	2925533	3.0439e+06	3.21883e+06	3043378	2.86788e+06	3149007	2.95452e+06	3.02979e+06	21.514	21.4661	21.2741	21.4534	21.4934	21.498	21.4524	21.4182	21.4632	21.4803	21.6181	21.5372	21.4516	21.5865	21.4945	21.5308	4	5	5	4	4	4	5
>ENSSSCP00000012218	5	0.891679	0.127946	0.982664	0.818576	ARF4	Sus scrofa ADP-ribosylation factor 4 (ARF4), mRNA. [Source:RefSeq mRNA;Acc:NM_001048072]|13|ENSSSCG00000011466|ENSSSCT00000012547	1.97058e+06	2.23077e+06	1.85773e+06	1.74587e+06	2.04797e+06	1757129	1.762e+06	1.95136e+06	1.75267e+06	1.63044e+06	1.68748e+06	1758818	1.93642e+06	2089246	1.8177e+06	1.9403e+06	1.95807e+06	1.84326e+06	1.96997e+06	21.0891	20.8251	20.7355	20.9658	20.7488	20.896	20.7411	20.6368	20.6864	20.7462	20.9946	20.7937	20.8878	20.901	20.8138	20.9097	4	5	5	4	4	4	4
>ENSSSCP00000017578	3	1.00918	0.903409	1.08589	0.261687	ARF5	Sus scrofa ADP-ribosylation factor 5 (ARF5), mRNA. [Source:RefSeq mRNA;Acc:NM_001145221]|18|ENSSSCG00000016593|ENSSSCT00000018066	42373	43283.3	46755	35409.1	44044.6	42761.9	47146.4	44560.9	46700.5	37321.5	43982.5	36859.8	46012.5	51949	43789.6	44243.2	44468.8	44131.8	47492.5	15.4015	15.5128	15.1118	15.4267	15.5249	15.4435	15.5112	15.1877	15.4246	15.1698	15.6648	15.4183	15.4332	15.4405	15.4295	15.5354	7	9	9	9	5	6	9
>ENSSSCP00000005391	7	1.05783	0.431173	1.14436	0.112372	ARF6	Sus scrofa ADP-ribosylation factor 6 (ARF6), mRNA. [Source:RefSeq mRNA;Acc:NM_001078677]|1|ENSSSCG00000005012|ENSSSCT00000005528	383969	425386	351984	332907	425599	406172	412924	415388	427225	376515	434452	370528	439399	464116	418708	434447	470969	415929	432224	18.6984	18.4251	18.3448	18.6991	18.6555	18.6641	18.7046	18.5223	18.7288	18.4992	18.8241	18.6756	18.7288	18.8453	18.666	18.7214	5	5	6	6	4	5	6
>ENSSSCP00000014073	2	0.865132	0.0365209	1.01275	0.967892	ARFGAP2	Sus scrofa ADP-ribosylation factor GTPase activating protein 2 (ARFGAP2), mRNA. [Source:RefSeq mRNA;Acc:NM_001244552]|2|ENSSSCG00000013245|ENSSSCT00000014465	28959.8	28749.1	26153.3	28895.5	32041.4	25054.1	23939.4	26521	23814.9	27440.7	27142	21466.5	29328.9	26418.3	29050.3	43057	25384.7	27130.3	24933.1	14.8112	14.6747	14.8186	14.9676	14.5471	14.6948	14.5396	14.744	14.7282	14.3898	14.6892	14.8263	15.394	14.6317	14.7276	14.6058	2	2	1	3	1	2	4
>ENSSSCP00000000039	7	0.820529	0.005905	0.9212	0.130125	ARFGAP3	ADP-ribosylation factor GTPase activating protein 3 [Source:HGNC Symbol;Acc:661]|5|ENSSSCG00000000037|ENSSSCT00000000039	149786	151780	137887	149851	159629	122904	116097	149295	111123	125421	112226	123262	137983	146394	131344	117194	134997	155071	142899	17.2116	17.0731	17.1932	17.2844	16.825	17.1878	16.7618	16.9364	16.776	16.9114	17.1595	17.003	16.8385	17.0426	17.2426	17.1246	7	7	7	7	5	7	6
>ENSSSCP00000009613	5	0.899212	0.187646	0.951418	0.531505	ARFIP1	ADP-ribosylation factor interacting protein 1 [Source:HGNC Symbol;Acc:21496]|8|ENSSSCG00000009010|ENSSSCT00000009867	113319	121284	98397.5	106031	127562	101898	104617	106074	104439	101609	95087.8	99557.4	107813	123164	113764	111405	89583.4	104038	104926	16.888	16.5863	16.6941	16.9608	16.6748	16.6947	16.6723	16.6327	16.537	16.6032	16.9102	16.7957	16.7654	16.4509	16.6668	16.679	5	5	4	5	4	4	5
>ENSSSCP00000015554	2	1.01177	0.915271	1.036	0.654484	ARFIP2	ADP-ribosylation factor interacting protein 2 [Source:HGNC Symbol;Acc:17160]|9|ENSSSCG00000014624|ENSSSCT00000015975	62049.3	75273.4	58416.8	58121.2	56385.7	62779.4	92716.7	49129	48394.7	73171.3	46690.4	66573.9	64282.8	66935.4	61305.7	63529.3	76933.9	57253.1	59739.5	16.1999	15.8341	15.8268	15.783	16.5005	15.5843	15.5626	16.159	15.5108	16.0227	16.0305	15.9037	15.9551	16.2313	15.8051	15.8664	0	1	2	0	0	0	1
>ENSSSCP00000010183	2	0.790595	0.00956463	0.819154	0.0285193	ARGLU1	ssc-mir-7144 [Source:miRBase;Acc:MI0023577]|11|ENSSSCG00000009536|ENSSSCT00000010454	11228.2	12209	11941.9	9763.63	10998.3	8876.97	8230.11	8885.04	9688.32	8875.9	9935.54	7646.91	9197.63	9525.99	9768.14	10407	10163.4	7645.09	7676.27	13.5757	13.5437	13.2532	13.425	13.0067	13.1172	13.242	13.1157	13.2784	12.9007	13.2177	13.2539	13.3453	13.3111	12.9003	12.9062	2	2	0	1	1	2	1
>ENSSSCP00000014088	10	1.01077	0.915303	0.982184	0.709794	ARHGAP1	Rho GTPase activating protein 1 [Source:HGNC Symbol;Acc:673]|2|ENSSSCG00000013256|ENSSSCT00000014480	523764	555039	504243	480788	554984	529407	544546	505444	643621	458960	541821	482048	514432	502265	453538	509125	574880	529062	517724	19.0822	18.9438	18.875	19.0821	19.0547	18.9472	19.2959	18.808	19.0475	18.8788	18.9381	18.7909	18.9577	19.1329	19.0131	18.9818	9	11	10	11	6	7	10
>ENSSSCP00000011760	2	1.09821	0.562435	1.22216	0.0491462	ARHGAP12	Rho GTPase activating protein 12 [Source:HGNC Symbol;Acc:16348]|10|ENSSSCG00000011026|ENSSSCT00000012068	28653.9	26398.7	29323.1	29192.6	29701.4	31467.9	32836.6	24774.4	38635.5	39411.9	32861.6	20287.5	35019.7	34320.3	29933.5	42192.8	36282.9	40776.5	26612.4	14.6882	14.8397	14.8333	14.8582	15.003	14.5966	15.2376	15.2663	15.0041	14.3083	15.0668	14.8695	15.3647	15.147	15.3155	14.6998	1	1	1	0	0	0	2
>ENSSSCP00000004539	2	1.94573	0.0261894	3.12397	0.096104	ARHGAP18	Uncharacterized protein [Source:UniProtKB/TrEMBL;Acc:F1S306]|1|ENSSSCG00000004205|ENSSSCT00000004646	2680.03	3920.26	1853.47	1945.03	3001.36	5214.62	4934.89	4566.94	5383.49	5966.99	5173.39	5262.03	8372.35	3637.44	30043.3	4347.37	4993.08	4810.72	2402.17	11.9367	10.856	10.9256	11.5514	12.2688	12.157	12.3943	12.5428	12.3369	12.3614	11.8287	14.8748	12.0859	12.2857	12.232	11.2301	0	0	0	0	0	0	1
>ENSSSCP00000008907	2	1.42488	0.0441684	1.15149	0.42854	ARHGAP25	Rho GTPase activating protein 25 [Source:HGNC Symbol;Acc:28951]|3|ENSSSCG00000008344|ENSSSCT00000009138	7474.38	6362.63	7710.85	9980.89	5843.16	10650.1	10441.6	8298.59	10217.1	12766.6	11207.4	10969	8606.66	11297.2	6301.04	10115.5	9278.44	8812.83	5834.92	12.6354	12.9127	13.285	12.5125	13.3501	13.0186	13.3187	13.6401	13.4522	13.4211	13.4637	12.6214	13.3043	13.1797	13.1054	12.5105	0	0	0	0	0	0	2
>ENSSSCP00000003363	3	0.528195	0.453222	0.526353	0.448665	ARHGAP35	Rho GTPase activating protein 35 [Source:HGNC Symbol;Acc:4591]|6|ENSSSCG00000003107|ENSSSCT00000003446	45922.5	19323	25936.8	114171	24259.5	24256.1	25686.3	21909.6	25437.6	24061.3	23029.5	25412	24171.5	26206	22519.1	21770.3	23862.8	25210.9	25459.8	14.238	14.6627	16.8008	14.5663	14.6487	14.4193	14.6347	14.5544	14.4912	14.6332	14.6776	14.4589	14.4101	14.5425	14.6218	14.6359	4	2	2	4	0	1	4
>ENSSSCP00000021934	5	1.22063	0.0875029	1.09506	0.444132	ARHGAP5	Uncharacterized protein [Source:UniProtKB/TrEMBL;Acc:I3LD06]|7|ENSSSCG00000001966|ENSSSCT00000002199	37795.6	33504.4	31366	44373.8	41938.2	46134.4	39868.4	48010.4	42397.5	44343.1	53565.1	48622	41388.4	46647.7	37389.3	29816.4	45248.2	45395	43834.1	15.0321	14.9369	15.4374	15.356	15.283	15.5511	15.3717	15.4364	15.709	15.5693	15.5095	15.1903	14.8638	15.4656	15.4702	15.4198	3	4	3	4	0	0	5
>ENSSSCP00000000634	6	1.09133	0.194936	0.786505	0.0044868	ARHGDIB	Rho GDP dissociation inhibitor (GDI) beta [Source:HGNC Symbol;Acc:679]|5|ENSSSCG00000000604|ENSSSCT00000000649	254056	243011	244469	248620	280122	277259	297910	238088	255514	324215	254230	293598	199816	187151	172718	234570	216273	214532	173654	17.8907	17.8993	17.9236	18.0957	18.1845	17.8611	17.963	18.3066	17.9558	18.1635	17.5138	17.3981	17.8397	17.7225	17.7108	17.4059	4	6	5	6	5	5	6
>ENSSSCP00000003294	5	0.861393	0.639364	1.15187	0.655232	ARHGEF1	Rho guanine nucleotide exchange factor (GEF) 1 [Source:HGNC Symbol;Acc:681]|6|ENSSSCG00000003040|ENSSSCT00000003377	50973.2	43163.1	35153.6	39297.7	86278.3	43908	42582.3	44400	30895.9	38006.7	37410.3	70152.5	58714.5	42451.2	88230.2	40077.1	39985.7	100483	41060.5	15.3975	15.1014	15.2622	16.3967	15.378	15.4383	14.9151	15.214	15.1911	16.0982	15.3735	16.429	15.2905	15.2872	16.6166	15.3255	2	5	4	3	0	0	5
>ENSSSCP00000016052	2	1.16919	0.122951	1.45065	0.00452199	ARHGEF12	Rho guanine nucleotide exchange factor (GEF) 12 [Source:HGNC Symbol;Acc:14193]|9|ENSSSCG00000015129|ENSSSCT00000016495	5763.83	4880.36	6795.66	5572.74	5806.55	6739.03	6842.81	5325.7	6703.19	6722.36	8176.78	6663.37	8361.29	7967.31	7464.6	8094.73	10817.6	7803.17	8020.3	12.2528	12.7304	12.4442	12.5035	12.7404	12.3788	12.7106	12.7148	12.9973	12.702	12.9599	12.8659	12.9828	13.4011	12.9298	12.9694	1	1	0	0	0	0	3
>ENSSSCP00000006929	14	0.842162	0.172214	0.580883	0.00637498	ARHGEF2	Rho/Rac guanine nucleotide exchange factor (GEF) 2 [Source:HGNC Symbol;Acc:682]|4|ENSSSCG00000006502|ENSSSCT00000007121	124144	145365	103799	106906	140507	104550	122214	113063	100483	81361.1	90854.3	119324	72113.4	74646.3	64885.6	76746.2	69602.8	70242.6	76556.8	17.1493	16.6634	16.706	17.1003	16.899	16.7868	16.6166	16.3121	16.4713	16.8645	16.1878	15.9856	16.2278	16.0869	16.1001	16.2242	11	11	9	11	8	7	16
>ENSSSCP00000022992	2	1.3076	0.243344	1.02538	0.719785	ARHGEF40	Rho guanine nucleotide exchange factor (GEF) 40 [Source:HGNC Symbol;Acc:25516]|GL896343.1|ENSSSCG00000023857|ENSSSCT00000022496	8309.96	4011.55	10280.2	10442.4	8505.73	10866.1	11005	12725.3	9039.43	10549.8	9936.6	11940.6	8520.87	9108.23	8319.45	7676.25	8617.4	9073.79	8330.09	11.9699	13.3276	13.3502	13.0542	13.4259	13.6354	13.142	13.3649	13.2785	13.5436	13.153	13.0223	12.9062	13.073	13.1475	13.0241	0	2	1	1	0	0	3
>ENSSSCP00000010198	2	0.882988	0.223493	0.943198	0.383993	ARHGEF7	Uncharacterized protein [Source:UniProtKB/TrEMBL;Acc:F1RLL1]|11|ENSSSCG00000009551|ENSSSCT00000010470	66519.2	68625	58996.3	73349.2	65106.3	58735.7	39826.9	63956.3	66186.4	54382.5	49577.9	78483.9	62740.7	65632.4	51251.8	73015	62899.8	62451.5	61193.8	16.0664	15.8483	16.1625	15.9905	15.2815	15.9648	16.0142	15.7309	15.5974	16.2601	16.0021	15.6453	16.1559	15.9408	15.9304	15.9011	4	7	7	6	2	2	8
>ENSSSCP00000004391	2	1.34173	0.290597	1.44748	0.169613	ARID1B	AT rich interactive domain 1B (SWI1-like) [Source:HGNC Symbol;Acc:18040]|1|ENSSSCG00000004064|ENSSSCT00000004493	11385.1	16383.4	8585.86	6700.08	13871	15275.7	17068.8	12727.1	14145.8	19209.7	7256.07	21246.6	16479.7	14075.6	29101.9	12304.3	14275.5	15147.5	13973.4	13.9999	13.0677	12.71	13.7598	14.0591	13.6356	13.7881	14.2295	12.825	14.3749	13.7809	14.8288	13.5869	13.8013	13.8868	13.7704	2	0	1	1	0	0	4
>ENSSSCP00000012120	2	1.23186	0.130305	1.31418	0.0783113	ARIH2	ariadne RBR E3 ubiquitin protein ligase 2 [Source:HGNC Symbol;Acc:690]|13|ENSSSCG00000011367|ENSSSCT00000012445	8232.51	10401.8	8249.63	6099.54	8179.11	10141.3	10915.9	9898.23	9164.07	9711.44	10661.6	10496.5	10819	12013.3	10330.2	8186.15	11833.9	9813.36	12737.1	13.3445	13.0101	12.5745	12.9977	13.4141	13.273	13.1618	13.2455	13.3801	13.3576	13.5523	13.3346	12.999	13.5306	13.2605	13.6368	1	2	1	1	0	0	2
>ENSSSCP00000000930	7	0.855956	0.0287729	0.849418	0.0213125	ARL1	Sus scrofa ADP-ribosylation factor-like 1 (ARL1), mRNA. [Source:RefSeq mRNA;Acc:NM_001031784]|5|ENSSSCG00000000870|ENSSSCT00000000950	250714	255397	220420	263727	263310	214600	200403	214226	224582	224438	214111	209839	212961	203133	226352	199297	198948	231510	218524	17.9624	17.7499	18.0087	18.0064	17.6125	17.7088	17.7769	17.776	17.708	17.6789	17.6321	17.7882	17.6046	17.602	17.8207	17.7374	4	5	3	6	3	3	5
>ENSSSCP00000013838	3	0.983095	0.841811	0.979984	0.798034	ARL2	|2|ENSSSCG00000013013|ENSSSCT00000014224	100619	118647	91882.6	93055.9	98889.6	98918	97563.2	97991.3	108699	99249.1	103449	86556	98604.9	100113	111285	109805	89070.4	85660.1	95695.3	16.8563	16.4875	16.5058	16.5935	16.574	16.5804	16.73	16.5988	16.6586	16.4013	16.6113	16.7639	16.7446	16.4427	16.3863	16.5462	4	4	5	5	3	4	5
>ENSSSCP00000025426	3	0.908805	0.330516	0.983276	0.818598	ARL3	|14|ENSSSCG00000024308|ENSSSCT00000030583	200158	204938	170282	239935	185478	181905	174967	149307	190440	203670	186191	186854	196811	150267	268064	167329	182991	195473	216742	17.6448	17.3776	17.8723	17.5009	17.4167	17.1879	17.539	17.6359	17.5064	17.5116	17.1972	18.0322	17.3523	17.4814	17.5766	17.7256	2	3	3	3	2	1	3
>ENSSSCP00000025526	3	0.991403	0.922475	1.14627	0.0990643	ARL6IP1	Sus scrofa ADP-ribosylation factor-like 6 interacting protein 1 (ARL6IP1), mRNA. [Source:RefSeq mRNA;Acc:NM_001244213]|GL894597.1|ENSSSCG00000025281|ENSSSCT00000032370	171361	192876	156287	150951	185329	169888	172299	182013	158561	144836	194746	166871	196426	181909	210642	201264	190942	199023	194776	17.5573	17.2538	17.2037	17.4997	17.3946	17.4737	17.2747	17.1441	17.5712	17.3484	17.4729	17.6844	17.6187	17.5428	17.6026	17.5715	3	3	3	3	2	2	3
>ENSSSCP00000012264	6	0.986632	0.753166	1.1371	0.0159582	ARL6IP5	Sus scrofa ADP-ribosylation-like factor 6 interacting protein 5 (ARL6IP5), mRNA. [Source:RefSeq mRNA;Acc:NM_001048073]|13|ENSSSCG00000011507|ENSSSCT00000012593	782761	805477	793753	712802	819012	772297	744792	776516	860952	709026	823994	718503	890081	907344	807753	928883	878431	879332	938744	19.6195	19.5983	19.4431	19.6435	19.5065	19.5667	19.7156	19.4355	19.6523	19.4546	19.7913	19.6236	19.8251	19.7446	19.746	19.8404	5	5	5	5	5	5	6
>ENSSSCP00000012295	7	1.10854	0.145297	1.1345	0.046404	ARL8B	ADP-ribosylation factor-like 8B [Source:HGNC Symbol;Acc:25564]|13|ENSSSCG00000011535|ENSSSCT00000012625	458433	505643	424561	428795	474733	508191	522354	479558	589887	491175	540746	425427	520094	515866	481415	514588	531228	509796	567671	18.9478	18.6956	18.7099	18.8568	18.9947	18.8713	19.1701	18.9059	19.0446	18.6986	18.9766	18.8769	18.9731	19.019	18.9596	19.1147	6	8	6	6	4	4	7
>ENSSSCP00000014807	4	0.999348	0.945736	0.917567	0.0178745	ARMC6	armadillo repeat containing 6 [Source:HGNC Symbol;Acc:25049]|2|ENSSSCG00000013927|ENSSSCT00000015213	65874.5	66906.1	62114.6	66574.2	67903.2	65831.6	65039.4	72356.1	70649.2	62339.6	66198.8	58406.3	60444.3	64504.4	56215.6	60629	59757.8	58245.2	63313.8	16.0298	15.9226	16.0227	16.0512	15.989	16.1428	16.1084	15.9279	16.0145	15.8338	15.9771	15.7787	15.8877	15.8668	15.8299	15.9502	3	3	3	4	3	3	4
>ENSSSCP00000008130	11	1.03124	0.562564	1.04325	0.466708	ARPC1A	actin related protein 2/3 complex, subunit 1A, 41kDa [Source:HGNC Symbol;Acc:703]|3|ENSSSCG00000007609|ENSSSCT00000008349	499994	569537	471801	460836	497802	515614	554814	509956	530718	502488	525103	470606	521621	492276	579028	511934	495684	491782	559021	19.1194	18.8478	18.8139	18.9252	19.0816	18.96	19.0176	18.9387	19.0022	18.8442	18.9091	19.1433	18.9656	18.9191	18.9077	19.0925	12	13	12	11	10	7	13
>ENSSSCP00000008146	9	1.04551	0.539879	1.06235	0.547708	ARPC1B	actin related protein 2/3 complex, subunit 1B, 41kDa [Source:HGNC Symbol;Acc:704]|3|ENSSSCG00000007625|ENSSSCT00000008365	388264	413030	394009	346802	399217	405933	432893	457190	385962	337144	452710	369697	412471	358397	489477	332597	423076	368371	502909	18.6559	18.5879	18.4038	18.6068	18.7237	18.8024	18.5581	18.363	18.7882	18.496	18.4512	18.9009	18.3434	18.6906	18.4908	18.9399	7	8	8	8	6	6	10
>ENSSSCP00000017147	13	0.969511	0.59022	0.987339	0.819938	ARPC2	actin related protein 2/3 complex, subunit 2, 34kDa [Source:HGNC Symbol;Acc:705]|15|ENSSSCG00000016185|ENSSSCT00000017625	1.76319e+06	1.91614e+06	1.63083e+06	1.64084e+06	1.86495e+06	1.70943e+06	1.92891e+06	1820980	1.76571e+06	1.50835e+06	1642963	1.58968e+06	1.74087e+06	1.92014e+06	1.76291e+06	1.80181e+06	1.60755e+06	1.587e+06	1765792	20.8698	20.6372	20.646	20.8307	20.8794	20.7963	20.7518	20.5245	20.6479	20.6003	20.8728	20.7495	20.781	20.6164	20.5979	20.7519	12	12	13	12	13	12	12
>ENSSSCP00000010484	7	0.988155	0.702859	0.972858	0.400367	ARPC3	Sus scrofa actin related protein 2/3 complex, subunit 3, 21kDa (ARPC3), mRNA. [Source:RefSeq mRNA;Acc:NM_001185135]|14|ENSSSCG00000009821|ENSSSCT00000010764	1.1654e+06	1.23495e+06	1.13918e+06	1128093	1.15938e+06	1.1516e+06	1.23797e+06	1.22993e+06	1.12149e+06	1.16486e+06	1.09389e+06	1.06144e+06	1133768	1.06358e+06	1.12995e+06	1.21642e+06	1.06742e+06	1.10758e+06	1.21766e+06	20.236	20.1196	20.1055	20.1449	20.2395	20.2301	20.097	20.1517	20.061	20.0176	20.0205	20.1078	20.2142	20.0257	20.079	20.2157	5	7	6	6	5	5	7
>ENSSSCP00000012310	8	0.875598	0.14384	0.902657	0.24534	ARPC4	actin related protein 2/3 complex, subunit 4, 20kDa [Source:HGNC Symbol;Acc:707]|13|ENSSSCG00000011552|ENSSSCT00000012642	1.96073e+06	2271437	1.69626e+06	1.81064e+06	2.06458e+06	1.71681e+06	1.69943e+06	1.91997e+06	1760689	1.57522e+06	1.71372e+06	1631833	1.76987e+06	1.95067e+06	1928683	1.69246e+06	1571051	1620149	1.85619e+06	21.1152	20.6939	20.7881	20.9774	20.6966	20.8727	20.7477	20.5871	20.7087	20.6381	20.8955	20.8792	20.6907	20.5833	20.6277	20.8239	8	8	8	8	8	7	8
>ENSSSCP00000016496	8	0.972054	0.533347	0.881757	0.0142849	ARPC5	Sus scrofa actin related protein 2/3 complex, subunit 5, 16kDa (ARPC5), mRNA. [Source:RefSeq mRNA;Acc:NM_001134357]|9|ENSSSCG00000015560|ENSSSCT00000016950	1.06613e+06	1077369	1.13877e+06	992280	1.05611e+06	1.03634e+06	1.08789e+06	1.12913e+06	943830	948603	960735	1.14783e+06	940068	937156	1.01872e+06	831231	940176	935286	977844	20.0391	20.119	19.9204	20.0103	20.0531	20.1068	19.8482	19.8554	19.8738	20.1305	19.8379	19.9583	19.6649	19.8426	19.835	19.8992	5	8	5	7	5	5	8
>ENSSSCP00000005995	8	0.977466	0.69608	0.901952	0.12983	ARPC5L	actin related protein 2/3 complex, subunit 5-like [Source:HGNC Symbol;Acc:23366]|1|ENSSSCG00000005596|ENSSSCT00000006154	560691	497261	588003	608994	548505	548056	531425	553867	555376	568980	484817	593871	505716	462318	591221	460718	485409	552589	482042	18.9236	19.1655	19.2161	19.0651	19.0195	19.0792	19.0831	19.118	18.8871	19.1798	18.8185	19.1733	18.8135	18.8888	19.0758	18.8788	4	6	7	7	5	4	7
>ENSSSCP00000002024	4	1.04521	0.631398	0.990506	0.96288	ARPIN	Uncharacterized protein [Source:UniProtKB/TrEMBL;Acc:F1SK02]|7|ENSSSCG00000001850|ENSSSCT00000002073	133525	94863.8	137790	149092	152353	139561	132882	140132	136090	148242	129045	150977	132257	130647	143972	118980	139586	129953	130404	16.5336	17.0721	17.1858	17.2171	17.0198	17.0964	17.0542	17.1776	16.9775	17.204	16.9953	17.1354	16.8604	17.0908	16.9876	16.9926	2	4	4	2	0	2	4
>ENSSSCP00000015771	4	1.1154	0.11868	0.891655	0.094405	ARRB1	arrestin, beta 1 [Source:HGNC Symbol;Acc:711]|9|ENSSSCG00000014852|ENSSSCT00000016204	85876	87484.9	91225.8	81004.9	83788.7	95786.3	105134	77944	94247.1	86658.8	109312	101422	76571.8	76842	63233.9	86955.6	88669.8	78014.7	65714.9	16.4167	16.4772	16.3057	16.3545	16.6819	16.2502	16.5242	16.4031	16.7381	16.63	16.2296	15.9484	16.408	16.4362	16.2515	16.0039	2	4	4	2	2	2	5
>ENSSSCP00000018982	3	0.939709	0.69648	0.856054	0.32608	ARRB2	arrestin, beta 2 [Source:HGNC Symbol;Acc:712]|12|ENSSSCG00000017918|ENSSSCT00000019500	76266.5	60467.3	91611.4	62034.4	90952.8	71668.3	67418.1	66085.8	98118.8	74378.9	62514.6	61493.6	65288.3	74549.6	70230.4	62260.4	62167	44952.3	77570	15.8839	16.4832	15.9208	16.4728	16.0408	16.0121	16.5822	16.1826	15.9319	15.9081	16.1859	16.0998	15.926	15.9239	15.4561	16.2432	2	2	2	1	0	1	3
>ENSSSCP00000027850	2	1.11	0.185775	1.23186	0.00802036	ARSA	arylsulfatase A [Source:HGNC Symbol;Acc:713]|GL896208.1|ENSSSCG00000026856|ENSSSCT00000031954	45335.9	43648.5	43874.5	43690.8	50129.8	50322.7	38084.3	53386.8	49154.1	57619.7	51912.9	51778.3	55847.5	48238.9	53323.6	53462.9	64178.5	52103.9	63777	15.4136	15.4211	15.415	15.6134	15.2169	15.7042	15.585	15.8143	15.6638	15.6601	15.5579	15.7025	15.7062	15.9698	15.6691	15.9607	2	1	2	2	0	1	1
>ENSSSCP00000025216	3	1.42582	0.00387927	1.44967	0.00625151	ARSD	arylsulfatase D [Source:HGNC Symbol;Acc:717]|GL896120.1|ENSSSCG00000020871|ENSSSCT00000027390	7501.44	6475.27	8475.74	7084.3	7970.44	10695.7	13064.1	9194.55	9708.56	9882.85	12521.3	9802.86	10874.6	9962.84	9096.45	9123.25	13280.1	13951.3	9833.71	12.6607	13.0491	12.7904	12.9604	13.6733	13.1666	13.245	13.2707	13.6121	13.259	13.2823	13.1511	13.1553	13.697	13.7681	13.2635	2	2	1	2	0	0	4
>ENSSSCP00000010806	9	1.06981	0.681098	1.16981	0.400489	ARVCF	armadillo repeat gene deleted in velocardiofacial syndrome [Source:HGNC Symbol;Acc:728]|14|ENSSSCG00000010133|ENSSSCT00000011094	149606	262309	124901	89219.9	121993	160049	139802	129327	165284	131014	125830	269038	175010	223792	191068	162254	184068	154280	134596	18.0009	16.9304	16.4451	16.8964	17.093	16.9807	17.3346	16.9994	16.9411	18.0374	17.7718	17.5437	17.3079	17.4899	17.2352	17.0383	0	1	1	4	2	3	9
>ENSSSCP00000007453	11	1.13709	0.0627101	1.04746	0.446408	ASAH1	N-acylsphingosine amidohydrolase (acid ceramidase) 1 [Source:HGNC Symbol;Acc:735]|17|ENSSSCG00000006995|ENSSSCT00000007660	437221	440213	473491	437322	397858	497160	526162	440841	582710	513258	485444	434545	457973	496331	408270	416481	465943	527496	433321	18.7478	18.853	18.7383	18.6019	19.0051	18.7499	19.1524	18.9693	18.8889	18.7291	18.9209	18.6392	18.6679	18.8298	19.0088	18.7251	6	4	8	8	8	8	11
>ENSSSCP00000009211	6	1.04159	0.726243	1.00129	0.988917	ASAP2	ArfGAP with SH3 domain, ankyrin repeat and PH domain 2 [Source:HGNC Symbol;Acc:2721]|3|ENSSSCG00000008642|ENSSSCT00000009454	81730.3	99241.3	73287.4	67485.7	86906.9	85129.8	70105.9	103511	82311.1	82674.6	71009.9	101166	81835.6	94930.4	98279.2	71391.9	67102.8	72419.9	86889.1	16.5987	16.1613	16.0423	16.4072	16.0972	16.6594	16.3288	16.3352	16.1157	16.6264	16.5346	16.5846	16.1235	16.0341	16.1441	16.4069	3	6	3	3	0	2	5
>ENSSSCP00000008264	2	1.16304	0.038518	1.31111	0.00371326	ASL	Uncharacterized protein [Source:UniProtKB/TrEMBL;Acc:F1RJH8]|3|ENSSSCG00000007738|ENSSSCT00000008483	14711.6	13812.8	14977.8	13646.2	16409.8	17110.2	16908.3	18505.7	19563.1	15569.7	17180.1	14934.4	19288.6	18170.8	18709.6	23393.9	20368.3	16188.8	18900	13.7537	13.8705	13.7362	14.0023	14.0454	14.1757	14.2559	13.9265	14.0684	13.8663	14.1493	14.1915	14.5138	14.314	13.9827	14.2061	0	1	0	0	0	0	3
>ENSSSCP00000014598	9	1.03	0.498309	1.14936	0.00349622	ASNA1	arsA arsenite transporter, ATP-binding, homolog 1 (bacterial) [Source:HGNC Symbol;Acc:752]|2|ENSSSCG00000013728|ENSSSCT00000015002	839361	822130	796327	870171	868817	864541	901895	779158	950210	902807	862600	790576	964725	997796	866694	1.04937e+06	952118	965345	957025	19.649	19.603	19.7309	19.7287	19.7826	19.5716	19.8579	19.7841	19.7183	19.5925	19.9284	19.7252	20.0011	19.8608	19.8807	19.8682	9	9	9	9	7	8	10
>ENSSSCP00000016267	17	0.748068	0.0034853	0.793524	0.0102484	ASNS	Sus scrofa asparagine synthetase (glutamine-hydrolyzing) (ASNS), mRNA. [Source:RefSeq mRNA;Acc:NM_001167640]|9|ENSSSCG00000015340|ENSSSCT00000016713	719872	787502	654133	659816	778037	538513	561444	613454	539826	454674	515794	545884	571236	586819	673152	575033	523109	540966	528334	19.5869	19.3192	19.3317	19.5695	19.0988	19.2266	19.0421	18.7945	18.9764	19.0582	19.1626	19.3606	19.1333	18.9968	19.0452	19.0111	17	16	14	15	15	13	17
>ENSSSCP00000023952	6	1.12857	0.0420445	1.31807	0.00147074	ASPH	Uncharacterized protein [Source:UniProtKB/TrEMBL;Acc:I3LIP6]|4|ENSSSCG00000025087|ENSSSCT00000028806	185316	200480	176526	170235	194024	209143	220550	215373	221421	188236	208422	200854	244261	252690	257883	239402	224151	234459	256978	17.6131	17.4295	17.3772	17.5659	17.7507	17.7165	17.7564	17.5222	17.6692	17.6158	17.947	17.9764	17.8691	17.7741	17.839	17.9713	3	3	2	4	1	1	5
>ENSSSCP00000013895	11	0.967526	0.684553	1.01821	0.908233	ASRGL1	asparaginase like 1 [Source:HGNC Symbol;Acc:16448]|2|ENSSSCG00000013065|ENSSSCT00000014281	570276	514686	533819	677068	555531	551757	462976	457344	613914	667697	548111	560499	580661	414805	638575	620534	624118	663572	522360	18.9733	19.026	19.3689	19.0835	18.8206	18.8029	19.2277	19.3488	19.0641	19.0964	18.6621	19.2845	19.2432	19.2515	19.3399	18.9947	10	9	9	10	5	7	10
>ENSSSCP00000011127	6	0.955364	0.744451	0.829987	0.163892	ATAD1	ATPase family, AAA domain containing 1 [Source:HGNC Symbol;Acc:25903]|14|ENSSSCG00000010438|ENSSSCT00000011423	87281.6	111678	81022.6	70658.5	85767.2	83385.8	80977.3	82005.9	74161.1	74675.6	88099.3	100395	72442.6	64350.7	77691.8	86164.4	69611	68145.6	68692.5	16.769	16.306	16.1086	16.3881	16.3052	16.3234	16.1784	16.1883	16.4268	16.6153	15.9737	16.2455	16.3948	16.087	16.0563	16.0679	3	5	3	3	0	3	4
>ENSSSCP00000003626	9	0.648385	0.177626	0.591947	0.110131	ATAD3A	Uncharacterized protein [Source:UniProtKB/TrEMBL;Acc:F1RJE4]|6|ENSSSCG00000003343|ENSSSCT00000003712	370576	423264	181144	486539	391355	240276	174433	247920	177045	247934	284060	310262	219361	185353	174757	308037	147889	230553	269578	18.6912	17.4668	18.8922	18.5781	17.4123	17.9195	17.4338	17.9196	18.1158	18.2431	17.4999	17.415	18.2327	17.1742	17.8147	18.0403	6	7	5	4	2	1	7
>ENSSSCP00000011403	3	1.15663	0.248108	1.13773	0.278399	ATE1	arginyltransferase 1 [Source:HGNC Symbol;Acc:782]|14|ENSSSCG00000010699|ENSSSCT00000011705	16322.6	17126.2	20227.2	15378.4	12558.8	18879.3	19570.8	19655.6	13875.5	20169.4	19497.5	20507	18570.8	17218.5	16002.9	16895.7	20571.3	21944.3	18792.3	14.0639	14.304	13.9086	13.6164	14.2564	14.2627	13.7603	14.2999	14.251	14.3238	14.0717	13.966	14.0444	14.3283	14.4216	14.1979	1	1	1	1	0	0	3
>ENSSSCP00000012711	6	1.02889	0.339812	1.04962	0.142009	ATG3	autophagy related 3 [Source:HGNC Symbol;Acc:20962]|13|ENSSSCG00000011930|ENSSSCT00000013054	220397	219856	214363	219506	227864	226765	232815	213418	236387	245014	219152	213803	231334	236980	205254	241334	243706	228375	232357	17.7462	17.7097	17.7439	17.7978	17.8288	17.7033	17.8508	17.9025	17.7416	17.7059	17.8544	17.647	17.8807	17.8948	17.801	17.826	4	6	6	5	4	5	6
>ENSSSCP00000012334	4	1.12235	0.358903	1.1291	0.358636	ATG7	Sus scrofa ATG7 autophagy related 7 homolog (S. cerevisiae) (ATG7), mRNA. [Source:RefSeq mRNA;Acc:NM_001190285]|13|ENSSSCG00000011575|ENSSSCT00000012667	64097.7	85312.8	63644.7	60943.9	46489.3	71940.1	80337.5	67122.2	75166.3	73098.5	64273.5	71642.5	72372.8	73831.7	61476.6	80377.5	80585.5	62519.9	75445.7	16.3805	15.9578	15.8952	15.5046	16.2938	16.0345	16.1978	16.1576	15.9719	16.1285	16.172	15.9077	16.2945	16.2982	15.932	16.2032	1	3	3	2	0	1	3
>ENSSSCP00000017131	19	1.06492	0.349766	1.16341	0.0489385	ATIC	Sus scrofa 5-aminoimidazole-4-carboxamide ribonucleotide formyltransferase/IMP cyclohydrolase (ATIC), mRNA. [Source:RefSeq mRNA;Acc:NM_001130736]|15|ENSSSCG00000016173|ENSSSCT00000017609	801592	919550	764838	722813	799170	853630	953330	862836	800335	741257	872460	891564	932580	991883	994248	903658	855636	899318	950737	19.8106	19.5448	19.4633	19.6081	19.8626	19.7187	19.6102	19.4996	19.7347	19.766	19.9198	19.9232	19.7854	19.7066	19.7785	19.8587	18	17	16	18	18	16	21
>ENSSSCP00000005398	2	1.13763	0.302435	1.26039	0.0665977	ATL1	Uncharacterized protein [Source:UniProtKB/TrEMBL;Acc:F1SHX5]|1|ENSSSCG00000005020|ENSSSCT00000005536	18649.9	22167.1	14687.1	17897.3	19848.2	21216.7	20506.8	23008.8	23963.3	15191.9	24739	19890.1	23506.2	28674.9	24998.3	21876.4	22492.4	22929.1	20066.3	14.4361	13.8423	14.1275	14.2767	14.3238	14.4899	14.5485	13.891	14.5945	14.2798	14.8075	14.6095	14.4171	14.4572	14.4849	14.2925	1	2	0	2	0	0	3
>ENSSSCP00000013882	14	1.0014	0.997696	1.0235	0.519076	ATL3	Uncharacterized protein [Source:UniProtKB/TrEMBL;Acc:F1RPY1]|2|ENSSSCG00000013054|ENSSSCT00000014268	867297	874136	870916	801948	922186	868513	820368	996737	832718	807682	879174	874396	887680	823646	940312	874296	902591	874671	910566	19.7375	19.7322	19.6131	19.8147	19.6459	19.9269	19.6675	19.6234	19.7458	19.7379	19.6517	19.8428	19.7378	19.7837	19.7384	19.7964	17	21	16	20	15	16	19
>ENSSSCP00000020053	4	0.959598	0.892737	1.24695	0.554666	ATOX1	antioxidant 1 copper chaperone [Source:HGNC Symbol;Acc:798]|GL894053.2|ENSSSCG00000026414|ENSSSCT00000028446	94459.1	51521.8	77424.2	181209	67681.6	90642.7	59410.6	51698.5	55784.8	192013	64552.1	120397	117786	96111.6	181038	67672.2	79459.4	221809	60624	15.6529	16.2405	17.4673	16.0465	15.8584	15.6578	15.7676	17.5508	15.9782	16.8774	16.5524	17.4659	16.0463	16.2779	17.759	15.8876	0	3	4	1	0	0	1
>ENSSSCP00000014810	17	0.964548	0.570977	1.02615	0.618761	ATP13A1	ATPase type 13A1 [Source:HGNC Symbol;Acc:24215]|2|ENSSSCG00000013930|ENSSSCT00000015216	374690	402635	337397	347741	410989	361407	358373	383672	340097	342415	371834	372050	384490	411264	371739	394099	386482	378806	364551	18.6191	18.3641	18.4077	18.6487	18.4511	18.5495	18.3756	18.3854	18.5043	18.5051	18.6497	18.5039	18.5882	18.56	18.5311	18.4758	12	11	10	11	5	8	18
>ENSSSCP00000007190	12	1.04377	0.351403	1.17871	0.0184928	ATP1A1	Sus scrofa ATPase, Na+/K+ transporting, alpha 1 polypeptide (ATP1A1), mRNA. [Source:RefSeq mRNA;Acc:NM_214249]|4|ENSSSCG00000006740|ENSSSCT00000007385	3.19064e+06	3.3961e+06	3126144	2.89248e+06	3.34784e+06	3330305	3.34895e+06	3.55222e+06	3400385	3254381	3.387e+06	3038888	3.76086e+06	3.83397e+06	3753127	3.66836e+06	3819752	3.7353e+06	3.75463e+06	21.6954	21.576	21.4639	21.6748	21.6753	21.7603	21.6973	21.634	21.6916	21.5351	21.8704	21.8397	21.8067	21.865	21.8328	21.8402	40	43	40	41	37	38	43
>ENSSSCP00000024543	2	0.91861	0.717774	0.870472	0.575526	ATP1A2	Uncharacterized protein [Source:UniProtKB/TrEMBL;Acc:I3LKC9]|12|ENSSSCG00000026507|ENSSSCT00000024123	97643.7	166511	87359.4	65645	71059.2	89696.5	68053.5	116107	69176.5	48830.5	64562.4	171449	84996.1	73914.9	142489	55650.8	53694.2	46031.1	138196	17.3453	16.4147	16.0024	16.1167	16.0544	16.8251	16.078	15.5755	15.9784	17.3874	16.1736	17.1205	15.7641	15.7125	15.4903	17.0764	2	2	1	1	2	2	2
>ENSSSCP00000003299	17	0.792139	0.0346777	0.712228	0.000996348	ATP1A3	ATPase, Na+/K+ transporting, alpha 3 polypeptide [Source:HGNC Symbol;Acc:801]|6|ENSSSCG00000003045|ENSSSCT00000003382	508032	557569	465754	517390	491415	402432	356970	538663	375281	398480	454902	290295	361835	428068	421783	357722	318207	325525	319704	19.0888	18.8292	18.9809	18.9066	18.4454	19.039	18.5176	18.6041	18.7952	18.1472	18.7075	18.6861	18.4485	18.2796	18.3124	18.2864	5	11	10	8	4	5	15
>ENSSSCP00000006713	5	1.23144	0.0495409	1.21775	0.0553516	ATP1B1	Sodium/potassium-transporting ATPase subunit beta-1 [Source:UniProtKB/Swiss-Prot;Acc:P05027]|4|ENSSSCG00000006296|ENSSSCT00000006901	498510	584321	479552	418658	511507	613883	607729	639749	591873	602737	651320	589891	607059	654505	628726	566206	610418	604714	577787	19.1564	18.8713	18.6754	18.9644	19.2131	19.2871	19.1749	19.2012	19.313	19.1701	19.32	19.2621	19.111	19.2194	19.2059	19.1402	5	5	5	5	5	5	5
>ENSSSCP00000019017	6	1.01593	0.923751	1.13633	0.0317407	ATP1B2	ATPase, Na+/K+ transporting, beta 2 polypeptide [Source:HGNC Symbol;Acc:805]|12|ENSSSCG00000017951|ENSSSCT00000019535	173536	185394	176386	162232	170130	176301	186423	143314	209234	154113	203514	161208	197194	192904	204974	221971	209680	182420	171213	17.5002	17.4284	17.3077	17.3763	17.5082	17.1288	17.6748	17.2336	17.6348	17.2986	17.5575	17.6451	17.76	17.6778	17.4769	17.3854	4	5	6	4	1	1	5
>ENSSSCP00000015817	2	0.960121	0.434022	1.06757	0.344629	ATP1B3	Uncharacterized protein [Source:UniProtKB/TrEMBL;Acc:F1STW3]|9|ENSSSCG00000014896|ENSSSCT00000016251	292932	299585	278631	272916	320598	281251	276476	287079	301675	263346	310591	248338	312725	373426	266592	331433	298983	284650	321263	18.1926	18.088	18.0581	18.2904	18.0768	18.1311	18.2026	18.0066	18.2447	17.9219	18.5105	18.0243	18.3384	18.1897	18.1188	18.2934	2	2	1	2	1	1	2
>ENSSSCP00000008334	10	0.925553	0.184872	1.07035	0.224574	ATP2A1	Sus scrofa ATPase, Ca++ transporting, cardiac muscle, fast twitch 1 (ATP2A1), mRNA. [Source:RefSeq mRNA;Acc:NM_001204393]|3|ENSSSCG00000007805|ENSSSCT00000008553	619434	692841	587714	568814	628368	573319	571771	574606	618280	535010	575175	565071	663012	718260	653742	704643	650543	634326	616557	19.4022	19.1648	19.1176	19.2613	19.1251	19.1322	19.2379	19.0292	19.1336	19.1081	19.4541	19.3184	19.4265	19.3113	19.2749	19.2339	9	9	9	9	7	8	10
>ENSSSCP00000019348	3	1.01402	0.789455	1.12511	0.0794316	ATP2A2	ATPase, Ca++ transporting, cardiac muscle, slow twitch 2 [Source:HGNC Symbol;Acc:812]|14|ENSSSCG00000027344|ENSSSCT00000022277	312243	356522	285360	302802	304289	316619	286267	317645	343715	297988	324012	330090	351309	354590	349454	380140	359544	342049	322076	18.4436	18.1224	18.208	18.2151	18.127	18.2771	18.3909	18.1849	18.3057	18.3325	18.4358	18.4147	18.5362	18.4558	18.3838	18.297	3	3	3	3	3	3	3
>ENSSSCP00000000984	10	1.444	0.135979	1.60872	0.0223063	ATP2B1	ATPase, Ca++ transporting, plasma membrane 1 [Source:HGNC Symbol;Acc:814]|5|ENSSSCG00000027898|ENSSSCT00000001006	157405	156974	160860	159478	152306	227292	152756	189990	322293	185362	376096	137257	253220	295535	165192	206754	413149	207876	230816	17.2602	17.2954	17.283	17.2166	17.2209	17.5356	18.298	17.5	18.5207	17.0665	18.173	17.3338	17.6576	18.6563	17.6654	17.8164	14	14	14	14	8	12	17
>ENSSSCP00000016196	9	1.09288	0.0936693	1.1095	0.145985	ATP2B4	Uncharacterized protein [Source:UniProtKB/TrEMBL;Acc:F1S6B3]|9|ENSSSCG00000015273|ENSSSCT00000016642	265177	257459	285434	254085	263731	289807	302965	290334	274682	303092	247604	320167	294214	324104	226139	296518	314478	314264	289782	17.974	18.1228	17.955	18.0087	18.2088	18.1474	18.0674	18.2094	17.9177	18.2885	18.3061	17.7869	18.1778	18.2626	18.2616	18.1446	7	5	5	8	3	4	8
>ENSSSCP00000011931	4	0.937032	0.511922	0.943653	0.546741	ATP2C1	Uncharacterized protein [Source:UniProtKB/TrEMBL;Acc:F1RSA2]|13|ENSSSCG00000011183|ENSSSCT00000012246	28887.5	30688.4	31162.5	23051.5	30647.6	27068.5	21799.7	28626.3	32455.7	25976.7	31419.5	22133	27259.8	26208.7	23320.5	23810.2	29641.8	27784.4	32792.9	14.9054	14.9275	14.4926	14.9035	14.412	14.8051	14.9862	14.6649	14.9394	14.4339	14.6778	14.5093	14.5393	14.8553	14.762	15.0011	4	4	4	3	0	1	6
>ENSSSCP00000004854	27	0.98043	0.698099	1.02418	0.647845	ATP5A1	Sus scrofa ATP synthase, H+ transporting, mitochondrial F1 complex, alpha subunit 1, cardiac muscle (ATP5A1), nuclear gene encoding mitochondrial protein, mRNA. [Source:RefSeq mRNA;Acc:NM_001185142]|1|ENSSSCG00000004499|ENSSSCT00000004971	1.80138e+07	19862402	16786042	16907720	18499182	1.76613e+07	18463372	17010472	18627104	17218832	17486618	17161454	1.84494e+07	20277818	18521746	19630682	17819038	17953980	16493211	24.2435	24.0008	24.0112	24.141	24.1382	24.0199	24.1509	24.0375	24.0597	24.0327	24.2734	24.1427	24.2266	24.0869	24.0978	23.9754	28	26	27	27	26	25	26
>ENSSSCP00000000432	8	1.03462	0.373275	1.00575	0.877156	ATP5B	ATP synthase subunit beta [Source:UniProtKB/TrEMBL;Acc:F1SLA0]|5|ENSSSCG00000000405|ENSSSCT00000000438	9.96484e+06	9901040	9622499	9668126	10667709	1.03098e+07	10463093	10160733	11214481	10133115	10621863	9265499	1.00221e+07	10140821	10105088	10605839	10176944	10127394	8976692	23.2391	23.198	23.2048	23.3467	23.3188	23.2765	23.4189	23.2726	23.3405	23.1434	23.2737	23.2686	23.3384	23.2788	23.2718	23.0978	23	23	22	23	21	23	22
>ENSSSCP00000014280	2	1.14533	0.630205	1.08143	0.880676	ATP5D	ATP synthase, H+ transporting, mitochondrial F1 complex, delta subunit [Source:HGNC Symbol;Acc:837]|2|ENSSSCG00000013431|ENSSSCT00000014675	122165	65984.8	117671	220176	84827.2	139919	78961.2	96190.7	98204.8	248012	135096	183052	132112	48772.9	197947	103950	129403	232154	80445.7	16.0098	16.8444	17.7483	16.3722	16.2689	16.5536	16.5835	17.92	17.0436	17.4819	15.5738	17.5948	16.6655	16.9815	17.8247	16.2957	1	1	2	1	1	1	2
>ENSSSCP00000007242	11	0.954869	0.637602	1.03477	0.673999	ATP5F1	ATP synthase, H+ transporting, mitochondrial Fo complex, subunit B1 [Source:HGNC Symbol;Acc:840]|4|ENSSSCG00000006789|ENSSSCT00000007437	758432	886679	676811	653794	816445	724203	696334	715340	719155	690054	814340	709997	784803	890754	770578	730741	885593	707590	723562	19.7581	19.3684	19.3185	19.639	19.4094	19.4483	19.4559	19.3963	19.6353	19.4375	19.7647	19.5556	19.479	19.7563	19.4326	19.4648	10	11	11	11	10	10	11
>ENSSSCP00000020095	2	1.11034	0.460117	0.985873	0.827693	ATP5H	Uncharacterized protein [Source:UniProtKB/TrEMBL;Acc:I3L7T8]|12|ENSSSCG00000025104|ENSSSCT00000025359	126790	94789.2	129875	158818	123676	140779	104701	140179	122893	188858	138971	149075	124998	73442.8	171734	97265.5	141166	153851	112531	16.5324	16.9868	17.277	16.9162	16.6759	17.0969	16.907	17.5269	17.0844	17.1857	16.1643	17.3898	16.5696	17.107	17.2312	16.78	5	5	5	5	4	5	5
>ENSSSCP00000022175	3	0.918297	0.715135	0.883001	0.526496	ATP5I	Sus scrofa ATP synthase, H+ transporting, mitochondrial Fo complex, subunit E (ATP5I), nuclear gene encoding mitochondrial protein, mRNA. [Source:RefSeq mRNA;Acc:NM_213915]|8|ENSSSCG00000023903|ENSSSCT00000025595	391913	277917	329039	567792	392904	359892	255242	350995	317038	422669	341320	472090	346060	223593	536920	292126	329098	448196	246422	18.0843	18.3279	19.115	18.5838	17.9615	18.4211	18.2743	18.6892	18.3808	18.8487	17.7705	19.0343	18.1562	18.3282	18.7738	17.9108	2	3	3	3	2	2	3
>ENSSSCP00000023528	3	1.09416	0.869034	1.06373	0.896942	ATP5J	ATP synthase-coupling factor 6, mitochondrial [Source:UniProtKB/Swiss-Prot;Acc:P13618]|JH118804.1|ENSSSCG00000030602|ENSSSCT00000030820	44765.8	12852.5	40295.9	101352	24562.8	48981	15042.7	31770.9	18185.4	101390	29980.7	97516.1	47618.8	6832.64	91091.3	22073.4	40317.7	110916	14481.1	13.6498	15.2983	16.629	14.5842	13.8768	14.9554	14.1505	16.6296	14.8717	16.5734	12.7382	16.475	14.43	15.2991	16.7591	13.8219	0	3	3	1	0	0	1
>ENSSSCP00000008135	2	0.96238	0.391624	0.959154	0.366822	ATP5J2	Sus scrofa ATP synthase, H+ transporting, mitochondrial Fo complex, subunit F2 (ATP5J2), nuclear gene encoding mitochondrial protein, mRNA. [Source:RefSeq mRNA;Acc:NM_001097464]|3|ENSSSCG00000027156|ENSSSCT00000008354	617869	668198	583702	593364	626212	594625	613834	618646	635806	579639	603470	516352	592632	680588	567478	580311	590538	533911	602964	19.3499	19.1549	19.1786	19.2563	19.2275	19.2388	19.2782	19.1448	19.2029	18.978	19.3764	19.1142	19.1465	19.1717	19.0262	19.2017	2	2	2	2	2	2	2
>ENSSSCP00000023926	4	1.19359	0.13421	1.33394	0.0438244	ATP5L	Sus scrofa ATP synthase, H+ transporting, mitochondrial Fo complex, subunit G (ATP5L), nuclear gene encoding mitochondrial protein, mRNA. [Source:RefSeq mRNA;Acc:NM_001244137]|9|ENSSSCG00000023777|ENSSSCT00000032072	461059	576317	394453	400310	473157	550314	675647	546918	498450	483051	514190	583628	615026	737890	753791	492029	501665	599576	605202	19.1365	18.5895	18.6108	18.852	19.3659	19.061	18.9271	18.8818	18.9719	19.1547	19.493	19.5238	18.9084	18.9364	19.1936	19.2071	4	4	4	4	4	4	4
>ENSSSCP00000012823	8	1.08695	0.346967	1.16683	0.136887	ATP5O	Sus scrofa ATP synthase H+-transporting mitochondrial F1 complex O subunit (LOC733678), nuclear gene encoding mitochondrial protein, mRNA. [Source:RefSeq mRNA;Acc:NM_001044606]|13|ENSSSCG00000012042|ENSSSCT00000013174	965775	1.16739e+06	862221	818392	1.0151e+06	1.04975e+06	1.11307e+06	1.045e+06	1.08868e+06	1.02212e+06	1.09418e+06	935433	1.12689e+06	1.23895e+06	1.13825e+06	1.15055e+06	1.02543e+06	1.02553e+06	1.18266e+06	20.1549	19.7177	19.6424	19.9532	20.0861	19.9951	20.0542	19.9631	20.0614	19.8353	20.2407	20.1184	20.1339	19.9678	19.9679	20.1736	7	8	7	7	7	7	8
>ENSSSCP00000018436	2	1.05409	0.554712	1.09254	0.347155	ATP6V0A1	Uncharacterized protein [Source:UniProtKB/TrEMBL;Acc:F1S1D6]|12|ENSSSCG00000017401|ENSSSCT00000018941	27902.7	21422.4	31163.3	29659.2	29366	29412	33611.2	30816.9	29815.1	26104.1	28622.4	27502.5	30484.8	34218.7	28992.1	30611.8	29652.5	31127.6	28306.2	14.3868	14.9276	14.8562	14.8419	15.0367	14.9114	14.8638	14.672	14.8049	14.7473	15.0625	14.8234	14.9018	14.8559	14.9259	14.7888	9	10	8	10	6	4	11
>ENSSSCP00000002995	10	0.93481	0.000351445	0.932686	0.0411902	ATP6V0D1	ATPase, H+ transporting, lysosomal 38kDa, V0 subunit d1 [Source:HGNC Symbol;Acc:13724]|6|ENSSSCG00000002776|ENSSSCT00000003074	524173	529526	517176	521915	528075	490002	497924	476708	506881	480086	493072	485343	488889	520318	503200	523373	450910	477214	458319	19.0143	18.9803	18.9935	19.0104	18.9256	18.8627	18.9513	18.8729	18.9114	18.8886	18.989	18.9408	18.9975	18.7825	18.8643	18.806	8	10	9	8	6	7	8
>ENSSSCP00000012697	31	1.00775	0.834795	1.03455	0.377236	ATP6V1A	ATPase, H+ transporting, lysosomal 70kDa, V1 subunit A [Source:HGNC Symbol;Acc:851]|13|ENSSSCG00000011916|ENSSSCT00000013040	3.0607e+06	3316259	2970998	2915341	3040192	3.08442e+06	3.11374e+06	3122521	3.10369e+06	2.84309e+06	2.9872e+06	3.33629e+06	3.16644e+06	3.27375e+06	3.23632e+06	3242850	3.04945e+06	2.88568e+06	3.31059e+06	21.6611	21.5025	21.4752	21.5357	21.5702	21.5743	21.5656	21.439	21.5104	21.6698	21.6425	21.6259	21.6288	21.5401	21.4605	21.6587	25	27	28	25	22	21	30
>ENSSSCP00000010250	20	1.00994	0.725642	1.00896	0.752873	ATP6V1B2	Uncharacterized protein [Source:UniProtKB/TrEMBL;Acc:F1RMZ8]|14|ENSSSCG00000009602|ENSSSCT00000010525	2.68671e+06	2.87325e+06	2.68046e+06	2.62727e+06	2565850	2.7134e+06	2815962	2625858	2.75823e+06	2.79597e+06	2.60939e+06	2674993	2.71077e+06	2.70258e+06	2719732	2.85703e+06	2.66109e+06	2578717	2.7455e+06	21.4543	21.354	21.3251	21.291	21.4252	21.3244	21.3953	21.4149	21.3153	21.3511	21.3659	21.375	21.4461	21.3436	21.2982	21.3886	24	26	23	24	20	22	26
>ENSSSCP00000006464	16	1.10971	0.0693847	1.25732	0.000965922	ATP6V1C1	ATPase, H+ transporting, lysosomal 42kDa, V1 subunit C1 [Source:HGNC Symbol;Acc:856]|4|ENSSSCG00000006054|ENSSSCT00000006643	896362	823855	894011	954587	912993	994705	971666	981577	1.07464e+06	924290	1.13151e+06	884545	1127009	1085594	1.05083e+06	1.22685e+06	1.10132e+06	1.15141e+06	1146049	19.652	19.7699	19.8645	19.8002	19.8901	19.9047	20.0354	19.818	20.1098	19.7546	20.0501	20.0031	20.2265	20.0708	20.135	20.1282	12	15	14	15	10	13	18
>ENSSSCP00000002485	6	0.952823	0.256618	0.945431	0.181399	ATP6V1D	ATPase, H+ transporting, lysosomal 34kDa, V1 subunit D [Source:HGNC Symbol;Acc:13527]|7|ENSSSCG00000002288|ENSSSCT00000002549	165832	168389	155550	167039	172351	158009	164707	170693	172799	153940	144438	141475	156783	171574	165192	157066	140782	143028	163055	17.3614	17.247	17.3498	17.395	17.3295	17.381	17.3987	17.232	17.1401	17.1102	17.3885	17.3338	17.261	17.1031	17.1259	17.315	3	4	4	5	3	2	6
>ENSSSCP00000000815	7	1.1413	0.0542099	1.17022	0.0325283	ATP6V1E1	Uncharacterized protein; V-type proton ATPase subunit E 1 [Source:UniProtKB/TrEMBL;Acc:F1SHR3]|5|ENSSSCG00000000767|ENSSSCT00000000831	451729	502069	421944	412921	469980	515559	540100	479484	517206	509433	531783	515347	528622	555762	538036	541932	522853	526216	486932	18.9375	18.6867	18.6555	18.8422	19.0429	18.8711	18.9804	18.9585	19.0205	18.9752	19.0841	19.0373	19.0478	18.996	19.0053	18.8934	8	10	8	9	9	8	11
>ENSSSCP00000017561	4	1.05727	0.763666	0.962803	0.902615	ATP6V1F	ATPase, H+ transporting, lysosomal 14kDa, V1 subunit F [Source:HGNC Symbol;Acc:16832]|18|ENSSSCG00000016577|ENSSSCT00000018047	87856.4	55589	79376	143769	72692.3	92888.3	71872.6	80314.9	63570.6	149211	80049.9	112310	84588.4	45230.2	125171	73037.6	84861.3	115683	63546.9	15.7625	16.2764	17.1334	16.1495	16.1332	16.2934	15.9561	17.187	16.2886	16.7771	15.465	16.9335	16.1564	16.3728	16.8198	15.9555	3	4	4	3	2	0	5
>ENSSSCP00000005887	5	1.02519	0.650864	0.940496	0.294374	ATP6V1G1	|1|ENSSSCG00000005491|ENSSSCT00000006037	321811	296678	334490	337337	318740	329917	298847	286411	349506	358020	348945	337775	302662	246721	332779	296266	328026	337025	275156	18.1785	18.3516	18.3638	18.282	18.189	18.1277	18.415	18.4497	18.4126	18.3657	17.9125	18.3442	18.1765	18.3235	18.3625	18.0699	4	5	4	4	4	3	4
>ENSSSCP00000023669	2	1.06638	0.795218	0.885972	0.709528	ATPIF1	Sus scrofa ATPase inhibitory factor 1 (ATPIF1), nuclear gene encoding mitochondrial protein, mRNA. [Source:RefSeq mRNA;Acc:NM_001097486]|6|ENSSSCG00000027072|ENSSSCT00000029874	96069.5	52550	91396.6	165248	75083.7	102446	62877.1	71922.4	68125.1	174190	101971	135594	85114.9	41644.2	125173	70682.1	88851	132491	51847.3	15.6814	16.4799	17.3343	16.1962	15.9402	16.1342	16.0559	17.4103	16.6378	17.0489	15.3458	16.9336	16.1091	16.4391	17.0155	15.662	2	2	2	2	1	1	2
>ENSSSCP00000010498	3	0.85867	0.00246831	0.780257	0.00125888	ATXN2	Uncharacterized protein [Source:UniProtKB/TrEMBL;Acc:F1RMZ0]|14|ENSSSCG00000009834|ENSSSCT00000010778	37613.3	35203.1	37214.6	39030	39005.2	32297.4	29650.7	32747.2	34708.7	30904.3	32038	33735.3	29348	25426.4	26886.2	33745.4	29631.8	32100.3	28297.9	15.1034	15.1836	15.2523	15.2514	14.8558	14.9991	15.083	14.9155	14.9675	15.042	14.634	14.7146	15.0424	14.8549	14.9703	14.7884	3	11	6	7	0	3	8
>ENSSSCP00000020782	9	0.997997	0.622171	1.20591	0.86048	ATXN2L	ataxin 2-like [Source:HGNC Symbol;Acc:31326]|3|ENSSSCG00000021845|ENSSSCT00000029453	515206	658349	457355	466112	479007	514174	1.00584e+06	208326	455282	686589	246973	482036	621291	512311	353791	442482	487425	371724	1.56001e+06	19.3285	18.803	18.8303	18.8697	19.94	17.6685	18.7964	19.3891	17.914	18.8788	18.9667	18.4325	18.7553	18.8948	18.5039	20.5731	4	9	6	5	2	5	7
>ENSSSCP00000002647	2	1.20787	0.127032	1.25096	0.0895959	ATXN3	Sus scrofa ataxin 3 (ATXN3), mRNA. [Source:RefSeq mRNA;Acc:NM_001123081]|7|ENSSSCG00000002446|ENSSSCT00000002716	11965.8	12768.5	8864.11	13455	12775.6	14453.1	15252.7	16118.5	13675.7	14113.2	13700.4	13857.9	14968.7	15032.1	16722.6	13305.6	17088.8	13261.9	14401.2	13.6403	13.1138	13.7158	13.6411	13.8968	13.9764	13.7393	13.7848	13.7419	13.7584	13.8758	14.0295	13.6997	14.0608	13.695	13.8139	0	1	0	0	1	0	0
>ENSSSCP00000008826	2	1.0684	0.36086	1.05499	0.507024	AUP1	ancient ubiquitous protein 1 [Source:HGNC Symbol;Acc:891]|3|ENSSSCG00000008268|ENSSSCT00000009054	50837.8	58407.4	43346.4	51874.7	49722.6	54315.2	51328.7	54549.1	61407.6	52562.3	55841.3	50202.4	53633.3	56247.1	63778.3	46809.5	52499	48313.8	54152.2	15.8339	15.4036	15.6627	15.6016	15.6475	15.7353	15.9061	15.6817	15.769	15.6155	15.7795	15.9608	15.5145	15.68	15.5601	15.7247	2	2	1	2	1	2	2
>ENSSSCP00000028068	3	0.984328	0.922828	0.878208	0.26096	AVEN	apoptosis, caspase activation inhibitor [Source:HGNC Symbol;Acc:13509]|GL895866.1|ENSSSCG00000029474|ENSSSCT00000032377	41455.9	32657.3	43073.6	42035.1	48057.5	40806.2	35743.9	42103	42666.8	42147.4	44655.8	37520.2	36406.9	31347.1	45969.9	36122.1	38778.4	27889.2	38334.7	14.9951	15.3945	15.3593	15.5525	15.1254	15.3616	15.3808	15.3632	15.4466	15.1954	14.936	15.4884	15.1406	15.243	14.7674	15.2264	0	4	3	1	1	1	3
>ENSSSCP00000003256	2	1.39677	0.113073	1.19181	0.312418	AXL	AXL receptor tyrosine kinase [Source:HGNC Symbol;Acc:905]|6|ENSSSCG00000003005|ENSSSCT00000003338	11814	7182.75	14730.2	11242	14100.9	16501.4	14323.1	14221.1	15201.2	14740.9	20611.1	19911.1	14080	10464.9	15021.9	16293.8	14549.9	13950.3	14199.5	12.8103	13.8465	13.4566	13.7835	13.8061	13.7957	13.8919	13.8475	14.3311	14.2813	13.3533	13.8748	13.992	13.8287	13.768	13.7936	0	1	1	2	0	0	2
>ENSSSCP00000024437	2	0.836755	0.0179929	0.714614	0.00710262	B3GAT3	beta-1,3-glucuronyltransferase 3 (glucuronosyltransferase I) [Source:HGNC Symbol;Acc:923]|2|ENSSSCG00000020809|ENSSSCT00000023287	35045	34878.3	36553.2	35127.8	33620.9	29324.1	34057.2	32819.2	30340.8	25427.3	28831.6	24468.6	25043.7	29972.5	22196.5	19747.8	29362	19895	29088.3	15.09	15.1577	15.1003	15.0371	15.0557	15.0023	14.889	14.6341	14.8154	14.5786	14.8714	14.438	14.2694	14.8417	14.2801	14.8282	1	2	1	1	0	0	2
>ENSSSCP00000027253	2	1.03722	0.791314	1.19675	0.716628	BABAM1	BRISC and BRCA1 A complex member 1 [Source:HGNC Symbol;Acc:25008]|GL892606.2|ENSSSCG00000028904|ENSSSCT00000025461	13798.1	8466.42	13230.2	18358.9	15137.1	14311.7	16349.3	19315	13376.1	14830.6	11784.5	10214.9	16513	27686.7	5078.45	18662.6	16099.6	14461.4	17089.2	13.0475	13.6916	14.1642	13.8858	13.9969	14.2374	13.7074	13.8563	13.5246	13.3184	14.7569	12.3102	14.1879	13.9747	13.8199	14.0608	0	2	1	2	0	1	2
>ENSSSCP00000001622	3	0.735435	0.00146415	0.759541	0.0182865	BAG2	Uncharacterized protein [Source:UniProtKB/TrEMBL;Acc:F1RZV1]|7|ENSSSCG00000001494|ENSSSCT00000001666	23827.6	22066	25688.9	24998.2	22557.3	17523.7	18408.3	13387.9	17847	17782.2	18477.3	19239.3	18098	12693.9	23425.6	20015.9	16341	19353.7	16758.2	14.4295	14.6489	14.6095	14.4613	14.1681	13.7086	14.1234	14.1181	14.1735	14.2318	13.6318	14.5158	14.2889	13.9962	14.2403	14.0326	2	3	2	1	0	1	2
>ENSSSCP00000011385	19	0.956138	0.528085	0.938775	0.391147	BAG3	BCL2-associated athanogene 3 [Source:HGNC Symbol;Acc:939]|14|ENSSSCG00000010686|ENSSSCT00000011687	715470	610832	729207	791657	730183	684088	598696	721490	710934	732613	641078	699717	671665	574727	736979	616619	679677	736312	685678	19.2204	19.476	19.5945	19.4779	19.1915	19.4606	19.4394	19.4827	19.2901	19.4164	19.1325	19.4913	19.234	19.3745	19.49	19.3872	12	17	17	14	3	9	17
>ENSSSCP00000026395	4	1.17868	0.383574	1.38157	0.107356	BAG5	BCL2-associated athanogene 5 [Source:HGNC Symbol;Acc:941]|GL896465.1|ENSSSCG00000024576|ENSSSCT00000026798	45284.4	41146.3	61630.1	44703.6	33657.4	53375.6	38106.1	64499	61948.2	43516.7	72211.1	39972.8	62563.5	66193.4	96166.8	56663	57905.3	58128.1	40324.7	15.3285	15.9113	15.4481	15.0386	15.2177	15.977	15.9188	15.4093	16.1399	15.2867	16.0144	16.5533	15.7901	15.8214	15.8269	15.2994	2	3	2	2	0	1	4
>ENSSSCP00000018161	2	0.665077	0.251433	0.834695	0.679631	BAIAP2	BAI1-associated protein 2 [Source:HGNC Symbol;Acc:947]|12|ENSSSCG00000017142|ENSSSCT00000018662	22099.1	14220.1	13255.3	33800.8	27120.2	14697.6	15156.2	15155.7	13301.4	16683.2	12980	14909.1	18446	16912.4	23116.4	18735.7	15271.5	18271	18369.1	13.7956	13.6943	15.0448	14.7271	13.8876	13.8876	13.6993	14.0261	13.664	13.8639	14.0458	14.4966	14.1935	13.8986	14.1573	14.165	1	1	0	1	0	0	1
>ENSSSCP00000013781	2	1.1038	0.758143	0.729244	0.491549	BANF1	Uncharacterized protein [Source:UniProtKB/TrEMBL;Acc:F1RU33]|2|ENSSSCG00000012961|ENSSSCT00000014167	80224.2	37652.1	59427.8	190491	33325.5	88551.3	47436.3	51685.8	27377.4	192661	83323.5	128824	58503	17379.9	162545	22880.8	27972	86131.6	34108.5	15.2004	15.8589	17.5394	15.0243	15.5337	15.6575	14.7407	17.5557	16.3464	16.975	14.0851	17.3105	14.4819	14.7717	16.3943	15.0578	2	2	3	2	1	1	2
>ENSSSCP00000017791	15	0.91739	0.199426	0.928116	0.279698	BASP1	Uncharacterized protein [Source:UniProtKB/TrEMBL;Acc:F1SRL9]|16|ENSSSCG00000016795|ENSSSCT00000018284	8.56938e+06	7.49831e+06	9563266	8770574	8445358	7.86146e+06	7.42997e+06	7.83064e+06	8012485	7604895	7.83181e+06	8458957	7.95337e+06	7.07777e+06	8.27675e+06	7466819	8.17985e+06	9124419	7594628	22.8381	23.1891	23.0642	23.0097	22.8249	22.9007	22.9338	22.8585	22.9009	23.012	22.7549	22.9806	22.8321	22.9636	23.1213	22.8565	16	17	17	17	15	15	17
>ENSSSCP00000003404	5	0.960086	0.252965	1.06327	0.164901	BAX	Uncharacterized protein [Source:UniProtKB/TrEMBL;Acc:F1RIQ4]|6|ENSSSCG00000003144|ENSSSCT00000003487	271136	287950	257238	261560	277796	260314	260599	276742	269977	257450	245072	252044	288292	290272	285865	253338	291273	292590	316414	18.1355	17.9727	17.9968	18.0837	17.9915	18.0782	18.0425	17.9739	17.9028	17.9433	18.147	18.125	17.9507	18.152	18.1585	18.2715	5	5	5	5	5	5	5
>ENSSSCP00000021721	2	1.41616	0.298553	1.20328	0.462198	BAZ1B	bromodomain adjacent to zinc finger domain, 1B [Source:HGNC Symbol;Acc:961]|3|ENSSSCG00000027342|ENSSSCT00000030732	8467.82	2793.1	11686.5	11867.5	7524.22	11991.8	15021.2	9249.96	16064.6	13371.7	12196	6047.18	10189.2	11520.1	7602.05	10745.9	8481.73	15295.9	7489.21	11.4476	13.5126	13.5347	12.8773	13.8747	13.1752	13.9716	13.7069	13.5741	12.562	13.4919	12.8922	13.3915	13.0501	13.9009	12.8706	0	2	0	1	0	0	0
>ENSSSCP00000020698	2	1.00443	0.879437	1.23193	0.274148	BCAM	basal cell adhesion molecule (Lutheran blood group) [Source:HGNC Symbol;Acc:6722]|6|ENSSSCG00000020657|ENSSSCT00000028783	25694.8	19463.6	35927.3	30094.8	17293.5	25808.6	18342.6	21542.3	27444.8	32210.9	25030.4	30280.7	31654.2	32445.5	27214.1	29898	34984.9	41136.2	24246.9	14.2485	15.1328	14.8772	14.0779	14.1629	14.3949	14.7442	14.9753	14.6114	14.8861	14.9857	14.7321	14.8678	15.0944	15.3281	14.5655	3	4	4	3	0	3	6
>ENSSSCP00000013581	3	0.973984	0.653771	1.10544	0.107333	BCAP31	B-cell receptor-associated protein 31 [Source:HGNC Symbol;Acc:16695]|X|ENSSSCG00000012772|ENSSSCT00000013964	1.31826e+06	1427929	1.28878e+06	1.16491e+06	1.39141e+06	1.28396e+06	1.21556e+06	1.36581e+06	1.37148e+06	1213844	1.31586e+06	1.22121e+06	1.45725e+06	1.43385e+06	1433075	1.48335e+06	1504857	1.43099e+06	1.45738e+06	20.4455	20.2976	20.1518	20.4081	20.2132	20.3813	20.3873	20.2112	20.3276	20.2199	20.4515	20.4507	20.5004	20.5212	20.4486	20.4749	8	9	8	8	7	8	9
>ENSSSCP00000025692	2	0.948683	0.614182	0.749728	0.0334098	BCAR1	breast cancer anti-estrogen resistance 1 [Source:HGNC Symbol;Acc:971]|6|ENSSSCG00000028878|ENSSSCT00000022592	17254.5	13843.7	18376.9	20261.9	16535.7	16369.1	18119.6	14519.7	11609.6	16232.8	14816.8	22916	12936.2	12969.1	12158	13313.6	12623.6	14740	11813	13.7569	14.1656	14.3065	14.0133	14.1453	13.8257	13.503	13.9866	13.8549	14.4841	13.6628	13.5696	13.7006	13.6238	13.8475	13.5281	1	1	2	2	0	1	1
>ENSSSCP00000024727	5	1.03693	0.59453	1.06433	0.500265	BCAT1	branched chain amino-acid transaminase 1, cytosolic [Source:HGNC Symbol;Acc:976]|5|ENSSSCG00000029163|ENSSSCT00000026706	139023	136567	118258	153545	147722	144157	161134	129001	154398	140796	146052	133562	147966	143308	170238	164591	135328	158877	115457	17.0592	16.8516	17.2283	17.1725	17.2979	16.977	17.2363	17.1032	17.1561	17.0271	17.1288	17.3772	17.3285	17.0461	17.2775	16.817	5	5	5	5	4	4	5
>ENSSSCP00000026382	3	1.36933	0.313074	1.89956	0.0231442	BCHE	Cholinesterase [Source:UniProtKB/Swiss-Prot;Acc:P32752]|13|ENSSSCG00000021503|ENSSSCT00000026297	32864.3	37335.1	38013.5	37333.4	18775.3	45002.1	44526.8	38990.6	70377.9	48098.3	50352.2	17666.5	62427.6	69314.4	47205.1	78363.7	63851.6	58079.5	57751.3	15.1882	15.2142	15.1882	14.1965	15.4424	15.2508	16.1028	15.5537	15.6198	14.1087	16.0809	15.5267	16.2579	15.9624	15.8257	15.8176	2	1	1	2	1	1	2
>ENSSSCP00000007697	2	0.967504	0.722298	0.850136	0.109139	BCL2L1	Sus scrofa BCL2-like 1 (BCL2L1), nuclear gene encoding mitochondrial protein, mRNA. [Source:RefSeq mRNA;Acc:NM_214285]|17|ENSSSCG00000007229|ENSSSCT00000007909	37298	41736.4	35660.1	30810.2	40985.3	36086	29124.1	38391.2	41899.6	40214.7	34072.6	32813.5	31708.4	34194.1	31482.8	33406.5	26388.8	29898.1	34879.9	15.349	15.122	14.9111	15.3228	14.8299	15.2285	15.3547	15.2954	15.0563	15.002	15.0615	14.9423	15.0278	14.6876	14.8678	15.0901	1	1	1	1	0	1	2
>ENSSSCP00000021882	14	1.02039	0.710549	1.05229	0.367864	BCL2L13	BCL2-like 13 (apoptosis facilitator) [Source:HGNC Symbol;Acc:17164]|5|ENSSSCG00000023043|ENSSSCT00000031909	685015	739411	643494	616791	740363	698985	732242	758421	680145	630481	667469	725150	720837	773553	734100	677813	663295	733539	742720	19.496	19.2956	19.2344	19.4979	19.482	19.5326	19.3755	19.2661	19.3483	19.4679	19.5611	19.4856	19.3705	19.3393	19.4845	19.5025	13	12	11	13	10	9	13
>ENSSSCP00000004499	15	0.98289	0.672893	0.905308	0.0471584	BCLAF1	BCL2-associated transcription factor 1 [Source:HGNC Symbol;Acc:16863]|1|ENSSSCG00000004163|ENSSSCT00000004602	414230	411150	446404	383592	415772	407142	384016	446213	423941	390561	403226	394897	375005	378147	368502	382222	372072	381883	367206	18.6493	18.768	18.5492	18.6654	18.5508	18.7674	18.6935	18.5752	18.6212	18.5911	18.5286	18.4913	18.544	18.5052	18.5428	18.4862	10	12	11	10	4	8	15
>ENSSSCP00000023473	9	1.17349	0.153586	1.31199	0.0444443	BDH2	Uncharacterized protein [Source:UniProtKB/TrEMBL;Acc:I3LHC8]|8|ENSSSCG00000022282|ENSSSCT00000024244	411266	516922	359525	349488	419130	482616	551674	464603	480823	434751	491842	472004	539579	562945	598787	480089	538810	494404	562439	18.9796	18.4557	18.4149	18.677	19.0735	18.8256	18.8751	18.7298	18.9078	18.8484	19.1026	19.1917	18.8729	19.0394	18.9153	19.1013	10	10	8	9	8	8	11
>ENSSSCP00000000817	4	1.07571	0.213503	1.04328	0.883909	BID	Sus scrofa BH3 interacting domain death agonist (BID), mRNA. [Source:RefSeq mRNA;Acc:NM_001030535]|5|ENSSSCG00000000769|ENSSSCT00000000833	42376.4	45911.6	40540.3	41576.8	41476.8	45584.9	49098.1	40376	46582.6	49960.3	48391.3	39101	44210.6	69234.4	41819.6	40856	38939.9	40574.8	33838.7	15.4866	15.3071	15.3435	15.34	15.5834	15.3012	15.5075	15.6085	15.5625	15.2549	16.0792	15.3519	15.3183	15.249	15.3083	15.0464	3	4	3	4	2	0	5
>ENSSSCP00000016660	9	1.03756	0.632517	1.00167	0.959275	BIN1	bridging integrator 1 [Source:HGNC Symbol;Acc:1052]|15|ENSSSCG00000015720|ENSSSCT00000017120	197099	157288	203447	229030	198632	204503	181952	194517	221247	217296	211231	200774	197428	174353	168323	224212	211890	214348	191442	17.2631	17.6343	17.8052	17.5997	17.4732	17.5695	17.7553	17.7293	17.6885	17.6152	17.4117	17.3609	17.7745	17.693	17.7096	17.5466	4	8	6	5	1	2	9
>Biognosys_iRT_Kit_Fusion001	6	0.798379	0.485273	0.772995	0.383489	Biognosys_iRT_Kit_Fusion Biognosys_iRT_Kit_Fusion		4.9306e+07	80382352	30932098	38286896	47622728	39364882	31084540	43487888	36924228	41827208	42517984	40347444	3.81133e+07	46595332	55151188	35664952	24612008	31061512	35594944	26.2604	24.8826	25.1903	25.5051	24.8897	25.3741	25.1381	25.3179	25.3416	25.266	25.4737	25.7169	25.088	24.5529	24.8886	25.0852	5	5	6	5	5	5	5
>ENSSSCP00000024077	4	1.04987	0.394356	1.21715	0.0109865	BLMH	Uncharacterized protein [Source:UniProtKB/TrEMBL;Acc:I3LJ20]|12|ENSSSCG00000027883|ENSSSCT00000030616	42322.1	43483.8	39464.6	44014.2	42325.7	44432.7	43448.9	38325	48534.3	42376.2	51468.9	42442.9	51512.4	53608.6	46998	49070.5	64374.6	47082.9	47940	15.4082	15.2683	15.4257	15.3692	15.407	15.226	15.5667	15.371	15.6514	15.3732	15.7102	15.5203	15.5826	15.9742	15.5229	15.5489	1	4	1	2	1	0	3
>ENSSSCP00000011242	2	1.08483	0.610253	1.00817	0.892524	BLOC1S2	biogenesis of lysosomal organelles complex-1, subunit 2 [Source:HGNC Symbol;Acc:20984]|14|ENSSSCG00000010551|ENSSSCT00000011543	18446.6	9137.48	21748.1	25439	17461.6	20011.4	15563.1	21907.7	21755.2	21957.1	14915.4	23969.7	18597.3	9683.31	20384.3	22842.9	18859.6	23207	16606.8	13.1576	14.4086	14.6348	14.0919	13.9258	14.4192	14.4091	14.4224	13.8645	14.5489	13.2413	14.3152	14.4795	14.203	14.5023	14.0195	0	2	2	2	0	0	1
>ENSSSCP00000017746	7	1.15519	0.00409533	1.19501	0.000126719	BLVRA	biliverdin reductase A [Source:HGNC Symbol;Acc:1062]|18|ENSSSCG00000016756|ENSSSCT00000018238	264385	255858	261707	276508	263467	305415	322874	322605	301805	314200	306636	264368	315943	306458	325300	316232	322808	303966	320897	17.965	17.9976	18.077	18.0073	18.3006	18.2994	18.2033	18.2613	18.2262	18.0122	18.2253	18.3114	18.2706	18.3003	18.2135	18.2917	4	4	5	5	4	4	7
>ENSSSCP00000026357	8	0.974917	0.877216	1.05706	0.767717	BLVRB	biliverdin reductase B (flavin reductase (NADPH)) [Source:HGNC Symbol;Acc:1063]|6|ENSSSCG00000021067|ENSSSCT00000031402	728082	554513	665501	984640	707674	709819	547028	569981	701319	1012331	700247	728009	769630	467187	906696	787623	896289	921896	638087	19.0809	19.3441	19.9092	19.4327	19.0613	19.1206	19.4197	19.9492	19.4175	19.4736	18.8336	19.7903	19.5871	19.7736	19.8142	19.2834	8	8	8	8	6	7	8
>ENSSSCP00000027258	3	1.18903	0.0526693	1.14062	0.11291	BMP2K	BMP2 inducible kinase [Source:HGNC Symbol;Acc:18041]|8|ENSSSCG00000027722|ENSSSCT00000024434	30677.6	32765.2	31853.2	25946.8	32145.1	36476.6	30672.5	36010.3	35858.9	41948.5	33203.8	41165.7	34991.5	36751.9	40381.2	36296.4	34699.7	28886.2	32933.3	14.9999	14.9591	14.6633	14.9723	14.9047	15.1361	15.13	15.3563	15.0191	15.3292	15.1655	15.3014	15.1475	15.0826	14.8181	15.0073	1	3	0	0	0	0	3
>ENSSSCP00000007110	4	1.00791	0.942902	1.00573	0.9631	BOLA1	bolA family member 1 [Source:HGNC Symbol;Acc:24263]|4|ENSSSCG00000006667|ENSSSCT00000007305	48782.4	30744	41517.2	82956.4	39911.9	49168.4	25731.6	36776.2	33408.5	90338.7	37554.4	71201.3	49061.7	33204.9	82634	29115.7	44093.5	75029.4	30292.9	14.908	15.3414	16.3401	15.2845	14.6513	15.1665	15.0279	16.4631	15.1967	16.1196	15.0191	16.3344	14.8295	15.4283	16.1952	14.8867	1	2	4	3	0	0	1
>ENSSSCP00000006329	2	1.04545	0.77105	0.771662	0.0713297	BOP1	Uncharacterized protein [Source:UniProtKB/TrEMBL;Acc:F1RSM4]|4|ENSSSCG00000005920|ENSSSCT00000006500	29418.2	24747.7	33037.7	29275.6	30612	30755.2	39083.5	32639.8	22267.2	25837.1	28805.8	35897.5	22700.9	26322.7	21193	27462.2	12428.9	25360.8	23438.1	14.595	15.0118	14.8374	14.9018	15.2543	14.9943	14.4426	14.6572	14.8141	15.1316	14.684	14.3713	14.7452	13.6014	14.6303	14.5166	2	2	2	2	0	0	3
>ENSSSCP00000001078	9	1.14751	0.229357	1.20707	0.0443147	BPHL	biphenyl hydrolase-like (serine hydrolase) [Source:HGNC Symbol;Acc:1094]|7|ENSSSCG00000001008|ENSSSCT00000001100	165505	146847	168090	194127	152957	189919	265121	150073	181572	183860	180744	178141	199776	183970	188981	218364	199386	215705	192250	17.164	17.3589	17.5666	17.2228	18.0163	17.1953	17.4702	17.4883	17.4636	17.4427	17.4891	17.5279	17.7364	17.6052	17.7187	17.5526	5	7	7	6	5	3	6
>ENSSSCP00000011537	13	1.04605	0.523044	1.16026	0.103058	BPNT1	3'(2'), 5'-bisphosphate nucleotidase 1 [Source:HGNC Symbol;Acc:1096]|10|ENSSSCG00000010822|ENSSSCT00000011840	546233	641836	461037	545989	536071	571386	605382	568971	555370	521715	565021	611856	633771	619945	645064	622702	652101	595584	667230	19.2918	18.8145	19.0585	19.0321	19.2075	19.118	19.0831	18.9929	19.1079	19.2228	19.2418	19.2991	19.2482	19.3147	19.1839	19.3478	12	13	10	10	9	10	14
>ENSSSCP00000017826	6	1.02242	0.699622	0.878058	0.00824445	BRIX1	BRX1, biogenesis of ribosomes, homolog (S. cerevisiae) [Source:HGNC Symbol;Acc:24170]|16|ENSSSCG00000016827|ENSSSCT00000018322	103765	107088	102651	103902	101420	106091	106658	117337	90683.4	97583.7	105612	118675	91111.9	102725	82409.8	95466.6	84797.8	91488.2	89784.2	16.7084	16.6474	16.6649	16.63	16.7026	16.8403	16.4686	16.5744	16.6884	16.8567	16.6484	16.3305	16.5427	16.3717	16.4813	16.4542	4	6	5	5	3	3	5
>ENSSSCP00000012325	2	1.02999	0.930896	1.16324	0.523767	BRK1	BRICK1, SCAR/WAVE actin-nucleating complex subunit [Source:HGNC Symbol;Acc:23057]|13|ENSSSCG00000011565|ENSSSCT00000012657	14572.8	8060.17	5887.92	35670.4	8672.77	15009.8	9030.98	6535.72	5028.83	35582.5	8882.58	24998.3	16951.6	13625.6	28132.5	12752.6	10457.4	28846.5	7895.4	12.9766	12.5235	15.1224	13.0823	13.1407	12.6741	12.296	15.1189	13.1168	14.6095	13.734	14.7799	13.6385	13.3522	14.8161	12.9468	1	1	3	1	0	0	1
>ENSSSCP00000011552	3	1.16968	0.335103	1.33389	0.00245837	BROX	BRO1 domain and CAAX motif containing [Source:HGNC Symbol;Acc:26512]|10|ENSSSCG00000010836|ENSSSCT00000011855	19257.3	20882.2	18485.5	19688.1	17973.4	22524.9	31817.4	15771.6	29010.1	21113	20240.3	17196.9	25687.2	27660.9	20428.6	27553.2	29445.2	23545.9	25489.2	14.35	14.1741	14.265	14.1336	14.9575	13.945	14.8243	14.3658	14.3049	14.0699	14.7556	14.3183	14.7499	14.8457	14.5232	14.6376	0	0	0	0	0	0	2
>ENSSSCP00000021622	2	0.984419	0.818577	1.10145	0.407623	BSCL2	Sus scrofa Berardinelli-Seip congenital lipodystrophy 2 (seipin) (BSCL2), mRNA. [Source:RefSeq mRNA;Acc:NM_001128459]|2|ENSSSCG00000020823|ENSSSCT00000025488	17649.7	15731.8	16069.6	17470.1	21327.2	17374.7	16889.2	18558.6	19693	21817.2	15365.9	11924	19440.1	22895.4	14098	20415.8	22682	19607.8	16941.9	13.9414	13.972	14.0926	14.3804	14.0438	14.1798	14.2654	14.4132	13.9074	13.5416	14.4828	13.7832	14.3174	14.4693	14.2591	14.0483	1	0	0	1	0	0	1
>ENSSSCP00000020663	4	1.01691	0.755433	1.09402	0.0287431	BSG	basigin (Ok blood group) [Source:HGNC Symbol;Acc:1116]|GL896290.2|ENSSSCG00000027907|ENSSSCT00000028173	618225	632251	597719	636863	606068	628681	601592	600233	707883	662055	657425	542895	676349	661471	636423	751893	706543	679993	621771	19.2701	19.1891	19.2806	19.2091	19.1984	19.1952	19.4332	19.3366	19.3265	19.0503	19.3353	19.2796	19.5202	19.4304	19.3752	19.246	4	4	3	4	3	4	4
>ENSSSCP00000014963	5	0.898819	0.101214	0.758158	0.00435394	BTF3	|2|ENSSSCG00000014071|ENSSSCT00000015371	1.00518e+06	885898	1.1001e+06	1.03678e+06	997951	903476	872414	873066	851714	902418	973964	947281	762087	744275	812113	724604	745565	814722	731241	19.7568	20.0692	19.9837	19.9286	19.7347	19.7357	19.7	19.7834	19.8935	19.8534	19.5055	19.6313	19.4668	19.508	19.6359	19.48	5	5	5	5	5	5	5
>ENSSSCP00000004180	4	0.962999	0.860097	0.893571	0.502803	BTF3L4	basic transcription factor 3-like 4 [Source:HGNC Symbol;Acc:30547]|6|ENSSSCG00000003866|ENSSSCT00000004278	244821	174744	250292	316099	238149	235762	223169	195802	243975	283795	267553	200280	218765	202274	226089	260069	228727	210262	185168	17.4149	17.9333	18.27	17.8615	17.7678	17.579	17.8964	18.1145	18.0295	17.6117	17.626	17.7865	17.9885	17.8033	17.6818	17.4985	3	3	3	4	2	3	4
>ENSSSCP00000011435	11	0.972613	0.118848	0.910409	0.0704581	BUB3	BUB3 mitotic checkpoint protein [Source:HGNC Symbol;Acc:1151]|14|ENSSSCG00000010726|ENSSSCT00000011737	518907	517987	506229	532055	519358	504696	490138	511984	497218	512104	488629	528102	472418	395647	548387	474474	459653	483804	472542	18.9826	18.9494	19.0212	18.9864	18.9028	18.9657	18.9235	18.9661	18.8984	19.0105	18.5939	19.0648	18.856	18.8102	18.8841	18.8501	8	11	10	10	8	8	10
>ENSSSCP00000017050	11	0.924282	0.127032	0.885487	0.00300644	BZW1	Sus scrofa basic leucine zipper and W2 domains 1 (BZW1), mRNA. [Source:RefSeq mRNA;Acc:NM_001244493]|15|ENSSSCG00000016094|ENSSSCT00000017522	1.15127e+06	1.13831e+06	1.14199e+06	1.172e+06	1.15277e+06	1.0641e+06	1.01828e+06	956105	1.2611e+06	1.07101e+06	937429	1.14066e+06	1.01943e+06	1060526	1.00837e+06	1039827	908451	1.03672e+06	1.0627e+06	20.1185	20.1231	20.1605	20.1367	19.9577	19.8668	20.2662	20.0305	19.8384	20.1214	20.0163	19.9436	19.9879	19.793	19.9836	20.0193	11	11	10	12	11	9	9
>ENSSSCP00000025724	5	0.888406	0.110051	0.840534	0.0288685	BZW2	basic leucine zipper and W2 domains 2 [Source:HGNC Symbol;Acc:18808]|9|ENSSSCG00000023118|ENSSSCT00000030703	77725.1	84149	73036	70421.4	83294.1	69051.5	74134.5	69107.2	78826.1	58501.6	73790	59949.4	65330.6	75532.3	66594.1	65221.7	59809.2	54458.1	70368.2	16.3607	16.1563	16.1037	16.3459	16.1779	16.0765	16.2664	15.8362	16.1711	15.8715	16.2048	16.0231	15.9931	15.8681	15.7329	16.1026	3	3	1	3	2	2	4
>ENSSSCP00000015870	4	0.957617	0.699769	1.00635	0.905186	C11orf54	chromosome 11 open reading frame 54 [Source:HGNC Symbol;Acc:30204]|9|ENSSSCG00000014948|ENSSSCT00000016307	83257	87782.1	71026	101661	72559	79728.4	56125.5	76617.4	88734.1	93976	78066.5	84850.7	83786	74245	96983.1	89305.2	82349	87226.8	72607.1	16.4216	16.1161	16.6334	16.1469	15.7764	16.2254	16.4372	16.52	16.2524	16.3726	16.18	16.5654	16.4465	16.3295	16.4125	16.1478	1	5	3	1	2	2	2
>ENSSSCP00000013787	3	1.38491	0.00167842	1.76044	2.8932e-06	C11orf68	chromosome 11 open reading frame 68 [Source:HGNC Symbol;Acc:28801]|2|ENSSSCG00000012966|ENSSSCT00000014173	24415	26541.9	23662.7	23405.1	24050.5	33812.5	40237.5	26204.8	35223.6	34291.3	34970.8	31947.3	42981.3	38560.5	39213.6	40982.8	49325.7	45924.4	43880.6	14.696	14.5303	14.5145	14.5538	15.2963	14.6775	15.1043	15.0656	15.0939	14.9634	15.2348	15.2591	15.3227	15.5901	15.487	15.4213	1	2	1	2	0	1	3
>ENSSSCP00000000282	6	1.15988	0.00516739	1.40435	2.78649e-05	C12orf10	chromosome 12 open reading frame 10 [Source:HGNC Symbol;Acc:17590]|5|ENSSSCG00000000267|ENSSSCT00000000286	93613.9	90790.5	92263.2	97837.6	93564.4	108581	119224	95715.7	101264	110519	113193	111569	131467	138557	147151	126626	127113	117616	131740	16.4703	16.4935	16.5781	16.5137	16.8633	16.5465	16.6278	16.7539	16.7884	16.7676	17.0801	17.1669	16.9502	16.9558	16.8437	17.0073	4	5	3	5	2	2	6
>ENSSSCP00000027153	2	0.840737	0.312578	1.14978	0.526004	C12orf57	chromosome 12 open reading frame 57 [Source:HGNC Symbol;Acc:29521]|5|ENSSSCG00000026877|ENSSSCT00000029383	9571.31	8046.33	8702.57	13829	7707.36	8046.96	3511.2	5765.55	4047.49	17311.3	6370.64	11275.5	11004.9	9706.89	12425.6	6774.64	7866.92	14059.6	15195.5	12.9741	13.0872	13.7554	12.912	11.7777	12.4932	11.9828	14.0794	12.6372	13.4609	13.2448	13.601	12.7259	12.9416	13.7793	13.8914	0	0	2	0	0	0	1
>ENSSSCP00000005407	15	1.02875	0.255701	1.04875	0.188592	C14orf166	chromosome 14 open reading frame 166 [Source:HGNC Symbol;Acc:23169]|1|ENSSSCG00000005029|ENSSSCT00000005545	998969	985134	981552	1.00159e+06	1.0276e+06	1.02769e+06	1.07317e+06	968815	1.07115e+06	1.05662e+06	1.03036e+06	966019	1.04767e+06	1.16003e+06	1.04541e+06	1.09765e+06	991806	948803	1042324	19.91	19.9047	19.9339	19.9708	20.0335	19.8859	20.0307	20.011	19.9747	19.8817	20.1457	19.9956	20.066	19.9197	19.8557	19.9914	14	13	14	14	14	10	15
>ENSSSCP00000019518	2	0.721183	0.743802	0.407249	0.434875	C16orf62	|GL893735.2|ENSSSCG00000027324|ENSSSCT00000023704	50480.8	20174.6	17406.9	143200	21141.1	36405.9	20132.3	21450.1	19437.8	17222.6	18496	121696	20558.2	22191.8	23088.1	20080.9	19416.3	17351.6	21220.7	14.3003	14.0874	17.1277	14.3678	14.2972	14.3887	14.2466	14.072	14.1749	16.8929	14.4377	14.4949	14.2935	14.245	14.0828	14.3732	1	1	1	1	0	1	1
>ENSSSCP00000018788	2	1.02087	0.861495	1.16687	0.0700794	C17orf75	chromosome 17 open reading frame 75 [Source:HGNC Symbol;Acc:30173]|12|ENSSSCG00000017733|ENSSSCT00000019300	7632.67	6584.06	7328.72	7935.82	8682.08	7791.98	8082.46	7964.7	6327.34	8783.28	6412.34	9181.77	8906.36	9574.16	9513.8	8251.79	8919.99	9426.71	7751.69	12.6848	12.8393	12.9542	13.0838	12.9806	12.9594	12.6274	13.1005	12.6466	13.1646	13.2249	13.2158	13.0105	13.1228	13.2025	12.9203	0	2	0	1	0	0	2
>ENSSSCP00000004166	5	0.958515	0.794568	1.005	0.925911	C1orf123	chromosome 1 open reading frame 123 [Source:HGNC Symbol;Acc:26059]|6|ENSSSCG00000003850|ENSSSCT00000004262	88912	74963.8	78969	125797	75917.7	85223.5	57170.3	76532.8	79018.7	119051	78800.8	100767	89356.4	44176.3	115185	97916.2	90506.5	115074	73279.6	16.1939	16.269	16.9407	16.2121	15.803	16.2238	16.2699	16.8612	16.2659	16.6207	15.431	16.8136	16.5793	16.4657	16.8122	16.1611	3	4	5	3	2	3	4
>ENSSSCP00000003829	2	1.15204	0.319034	0.608585	0.00015748	C1QB	Uncharacterized protein [Source:UniProtKB/TrEMBL;Acc:F1STZ1]|6|ENSSSCG00000003528|ENSSSCT00000003919	78147.7	73784.7	78965.2	75333.5	84507.3	90029	120294	56960	78150.4	96267.2	90358.2	98144	47559.5	37221.8	45339.3	56126.1	53630.6	49751.5	43287.8	16.171	16.2689	16.201	16.3668	16.8762	15.7977	16.254	16.5548	16.4634	16.5826	15.1839	15.4685	15.7764	15.7108	15.6025	15.4017	2	1	1	2	1	1	2
>ENSSSCP00000003826	3	1.19997	0.17047	0.780213	0.127434	C1QC	complement component 1, q subcomponent, C chain [Source:HGNC Symbol;Acc:1245]|6|ENSSSCG00000003525|ENSSSCT00000003916	65034.9	47053.7	64780.5	72898.2	75407.1	78039.8	85030.7	67991.2	67718.5	78110.6	83244.7	86143.3	50741	46302.1	31038.5	64061.4	50712.3	57326.2	55005.9	15.522	15.9833	16.1536	16.2024	16.3757	16.0531	16.0473	16.2532	16.3451	16.3945	15.4988	14.9218	15.9672	15.63	15.8069	15.7473	2	1	1	2	0	2	2
>ENSSSCP00000024062	7	0.919166	0.360731	0.880442	0.192441	C21orf33	chromosome 21 open reading frame 33 [Source:HGNC Symbol;Acc:1273]|13|ENSSSCG00000025525|ENSSSCT00000025442	193402	163966	192377	227777	189490	177769	149617	171390	157553	216229	187477	184349	170280	131678	185538	184913	182367	184085	153097	17.323	17.5536	17.7973	17.5318	17.1909	17.3869	17.2655	17.7222	17.5164	17.4921	17.0067	17.5014	17.4965	17.4765	17.49	17.2241	3	7	7	6	2	3	7
>ENSSSCP00000014399	2	1.45857	0.115275	0.933123	0.70252	C3	|2|ENSSSCG00000013551|ENSSSCT00000014800	37797.7	52491.3	33206.8	36225.5	29267.1	55130.7	71306	32993.3	84148.5	60248.3	39193	42895	35269.9	32989.7	45985.5	38544.4	36257.3	26020.5	31822	15.6798	15.0192	15.1447	14.837	16.1217	15.0099	16.3607	15.8786	15.2583	15.3885	15.0097	15.4889	15.2342	15.146	14.6674	14.9577	2	2	1	2	3	1	4
>ENSSSCP00000001528	2	1.20394	0.419993	1.45583	0.0212586	C4A	Sus scrofa complement C4 (C4), mRNA. [Source:RefSeq mRNA;Acc:NM_001123089]|7|ENSSSCG00000001427|ENSSSCT00000001570	10249.9	11689.1	9528.63	11561.7	8220.11	12340.2	18380.2	7478.11	14730.6	14919.7	9939.91	8592.78	14922.1	10962.7	21239.6	15118.6	11987.5	15587.3	14637	13.5129	13.2181	13.4971	13.0049	14.1659	12.8685	13.8465	13.8649	13.279	13.0689	13.4203	14.3745	13.884	13.5492	13.9281	13.8373	1	1	0	0	6	0	2
>ENSSSCP00000017871	7	1.09766	0.179121	1.13988	0.0515584	C5orf51	chromosome 5 open reading frame 51 [Source:HGNC Symbol;Acc:27750]|16|ENSSSCG00000016864|ENSSSCT00000018367	144852	134304	161729	149135	134242	158999	161053	157825	152087	144758	146483	191787	165115	170308	165241	171548	161129	148182	174281	17.0351	17.3032	17.1863	17.0345	17.2972	17.268	17.2145	17.1433	17.1604	17.5491	17.3778	17.3342	17.3882	17.2979	17.177	17.4111	4	3	4	3	1	1	7
>ENSSSCP00000021178	10	0.916687	0.190169	1.03851	0.600663	C9orf64	chromosome 9 open reading frame 64 [Source:HGNC Symbol;Acc:28144]|10|ENSSSCG00000026291|ENSSSCT00000030955	240224	247741	218005	225138	270013	220211	221197	209887	242976	202550	236456	208199	249475	255449	296494	264280	227500	227191	225937	17.9185	17.734	17.7805	18.0427	17.755	17.6793	17.8905	17.6279	17.8512	17.6676	17.9627	18.1776	18.0117	17.7955	17.7935	17.7856	6	7	9	5	4	3	6
>ENSSSCP00000006550	15	1.06087	0.683743	1.1664	0.262472	CA2	carbonic anhydrase II [Source:HGNC Symbol;Acc:1373]|4|ENSSSCG00000006140|ENSSSCT00000006733	1.26441e+07	10339322	13324496	13775256	13137393	1.34138e+07	11348624	9736599	15492860	17574726	13940483	12389543	1.47481e+07	10798719	12850197	16934878	20512212	14625841	12766757	23.3016	23.6676	23.7156	23.6472	23.436	23.215	23.8851	24.067	23.7328	23.5626	23.3644	23.6153	24.0135	24.29	23.802	23.6059	13	14	15	15	12	11	14
>ENSSSCP00000006551	10	1.06794	0.594495	1.25902	0.0697679	CA3	Sus scrofa carbonic anhydrase III, muscle specific (CA3), mRNA. [Source:RefSeq mRNA;Acc:NM_001008688]|4|ENSSSCG00000006141|ENSSSCT00000006734	780584	604178	819121	893209	805826	833614	794617	607580	982506	955477	908186	753319	982769	950235	801789	1.18212e+06	1.11307e+06	999698	849698	19.2046	19.6437	19.7686	19.6201	19.5999	19.2127	19.9061	19.8659	19.7926	19.5229	19.8579	19.6129	20.1729	20.0861	19.9311	19.6966	8	9	10	8	7	7	8
>ENSSSCP00000017231	6	1.02164	0.617117	1.06935	0.132622	CAB39	Uncharacterized protein [Source:UniProtKB/TrEMBL;Acc:F1SMX5]|15|ENSSSCG00000016266|ENSSSCT00000017712	77389.3	81674	75925.6	80486.9	71470.9	79063.7	85787.4	71761.3	81491.9	78550.4	81711.4	75079.6	82756.3	87427.5	85502.3	87431.2	75346.2	79883.3	80947.3	16.3176	16.2123	16.2965	16.1251	16.3885	16.1309	16.3144	16.2613	16.3182	16.1961	16.4158	16.3837	16.4159	16.2012	16.2856	16.3047	8	9	9	8	6	7	10
>ENSSSCP00000016329	17	0.963355	0.296953	0.872079	0.00181178	CACNA2D1	Sus scrofa calcium channel, voltage-dependent, alpha 2/delta subunit 1 (CACNA2D1), mRNA. [Source:RefSeq mRNA;Acc:NM_214183]|9|ENSSSCG00000015402|ENSSSCT00000016777	341572	339714	349249	350958	326366	329055	349924	341559	318485	325092	351198	288072	297878	297720	281135	308669	273109	305145	321487	18.374	18.4139	18.4209	18.3161	18.4167	18.3818	18.2809	18.3105	18.4219	18.1361	18.1836	18.1009	18.2357	18.0591	18.2191	18.2944	13	16	14	15	7	6	19
>ENSSSCP00000012166	8	1.10901	0.337783	0.972565	0.883189	CACNA2D2	calcium channel, voltage-dependent, alpha 2/delta subunit 2 [Source:HGNC Symbol;Acc:1400]|13|ENSSSCG00000011412|ENSSSCT00000012492	170708	141234	188147	209023	144429	189317	178553	161871	197951	207954	204304	185266	166025	179757	148368	177742	170642	166476	153162	17.1077	17.5215	17.6733	17.14	17.446	17.3045	17.5948	17.6659	17.6404	17.4992	17.4557	17.1788	17.4394	17.3806	17.345	17.2247	7	8	8	7	5	6	9
>ENSSSCP00000016440	11	0.938732	0.166836	0.90417	0.0584848	CACYBP	calcyclin binding protein [Source:HGNC Symbol;Acc:30423]|9|ENSSSCG00000015504|ENSSSCT00000016891	446943	407692	472929	466227	440923	419559	425356	411183	418089	428735	444358	389636	404112	363005	417250	443736	409421	378920	412340	18.6371	18.8513	18.8307	18.7502	18.6983	18.6494	18.6734	18.7097	18.7614	18.5718	18.4696	18.6706	18.7593	18.6432	18.5315	18.6535	10	11	11	11	8	7	11
>ENSSSCP00000025052	24	0.951474	0.434576	0.983669	0.80447	CAD	carbamoyl-phosphate synthetase 2, aspartate transcarbamylase, and dihydroorotase [Source:HGNC Symbol;Acc:1424]|GL895077.1|ENSSSCG00000028978|ENSSSCT00000024601	692320	784229	656227	625229	703594	658724	690645	644817	693546	579508	676031	667798	681014	701316	743520	645545	631637	641625	722439	19.5809	19.3238	19.254	19.4244	19.3976	19.2985	19.4036	19.1445	19.3667	19.3491	19.4197	19.504	19.3002	19.2687	19.2914	19.4625	17	15	14	15	12	9	21
>ENSSSCP00000015987	2	1.18173	0.100543	1.18692	0.115029	CADM1	cell adhesion molecule 1 [Source:HGNC Symbol;Acc:5951]|9|ENSSSCG00000015063|ENSSSCT00000016429	203836	201068	243879	199547	170849	240879	283235	234590	223558	223594	215776	264519	241936	265997	188686	218028	273833	266826	238244	17.6173	17.8958	17.6064	17.3824	18.1116	17.8398	17.7703	17.7705	17.7192	18.013	18.021	17.5256	17.7342	18.0629	18.0255	17.8621	2	1	1	1	1	1	2
>ENSSSCP00000012784	8	1.00655	0.778052	1.16382	0.372881	CADM2	cell adhesion molecule 2 [Source:HGNC Symbol;Acc:29849]|13|ENSSSCG00000011999|ENSSSCT00000013130	261005	426033	242737	215971	159280	262715	252647	205139	310500	274688	252352	280968	303763	307090	269672	334459	296654	323090	291614	18.7006	17.889	17.7205	17.2812	17.9468	17.6462	18.2442	18.0674	17.9451	18.1	18.2283	18.0408	18.3515	18.1784	18.3016	18.1537	3	4	5	4	1	2	8
>ENSSSCP00000006838	9	1.2902	0.0131433	1.61212	0.000782487	CADM3	cell adhesion molecule 3 [Source:HGNC Symbol;Acc:17601]|4|ENSSSCG00000006415|ENSSSCT00000007028	189958	197452	213960	165298	183120	245083	243938	239111	266670	252554	279082	189143	306235	299740	288026	322498	333111	277197	316835	17.5911	17.707	17.3347	17.4824	17.8962	17.8673	18.0247	17.9462	18.0903	17.5291	18.1934	18.1358	18.2989	18.3456	18.0806	18.2734	6	8	5	5	2	3	8
>ENSSSCP00000003315	5	1.02402	0.636497	0.926467	0.19089	CADM4	cell adhesion molecule 4 [Source:HGNC Symbol;Acc:30825]|6|ENSSSCG00000003061|ENSSSCT00000003398	81556	79814.2	87650.3	85269.8	73489.9	83515.1	74102.4	87844.5	82305.9	84677.6	90375	81785.4	75559	73700.1	85581.7	70908.4	77781.2	66285.3	79097.2	16.2844	16.4195	16.3797	16.1653	16.1772	16.4227	16.3287	16.3697	16.4636	16.3196	16.1694	16.385	16.1137	16.2471	16.0164	16.2713	4	3	3	2	1	2	3
>ENSSSCP00000012243	4	0.825894	0.0705464	0.926275	0.408707	CADPS	Ca++-dependent secretion activator [Source:HGNC Symbol;Acc:1426]|13|ENSSSCG00000011489|ENSSSCT00000012572	49200.4	50687.2	39942.8	50372.1	55799.6	40634.3	38492.7	44999.5	44358.5	37537.9	41533.4	36883.9	45573.1	45649.7	38250	48292.1	45742.8	47438.7	48065.4	15.6293	15.2856	15.6203	15.768	15.2323	15.4576	15.4369	15.1961	15.342	15.1707	15.4783	15.2232	15.5595	15.4813	15.5338	15.5527	3	4	6	5	3	3	6
>ENSSSCP00000016247	2	1.14531	0.441975	0.921866	0.710694	CALCR	calcitonin receptor [Source:HGNC Symbol;Acc:1440]|9|ENSSSCG00000015320|ENSSSCT00000016693	20493.4	12883.9	22870.2	22376.8	23842.8	23471.4	27468.8	20336.4	26625.6	15368.6	27730.8	23298.4	18892.2	19800.6	14241.8	18146.6	20916.3	22856.3	17391.6	13.6533	14.4812	14.4497	14.5413	14.7455	14.3118	14.7005	13.9077	14.7592	14.5079	14.2733	13.7978	14.1474	14.3523	14.4803	14.0861	2	1	0	1	0	0	2
>ENSSSCP00000020081	3	0.977673	0.889164	0.800965	0.14165	CALD1	caldesmon 1 [Source:HGNC Symbol;Acc:1441]|18|ENSSSCG00000016535|ENSSSCT00000031119	1.55606e+06	1.53149e+06	1.99541e+06	1.21527e+06	1.48205e+06	1.52131e+06	1.58376e+06	1.90664e+06	1333789	1.31479e+06	1.29352e+06	1.69538e+06	1.24635e+06	1.3181e+06	1.23419e+06	816829	1.17883e+06	1393798	1.53633e+06	20.5465	20.9283	20.2128	20.4992	20.5949	20.8626	20.3471	20.3264	20.3029	20.6932	20.33	20.2351	19.6397	20.1689	20.4106	20.5511	33	33	31	34	29	30	35
>ENSSSCP00000009000	5	1.02913	0.81086	0.914184	0.587035	CALM1	Uncharacterized protein [Source:UniProtKB/TrEMBL;Acc:F2Z5G3]|3|ENSSSCG00000008433|ENSSSCT00000009234	4.11157e+06	3.21625e+06	3.8755e+06	5750701	3603823	4.23135e+06	3.30407e+06	3.76936e+06	3632476	5662007	4327472	4.69273e+06	3.75873e+06	2.17406e+06	4572451	3.9436e+06	3511545	5126060	3.22468e+06	21.617	21.886	22.4553	21.7811	21.6558	21.8459	21.7925	22.4329	22.0451	22.162	21.052	22.1245	21.9111	21.7437	22.2894	21.6207	6	6	8	6	6	6	7
>ENSSSCP00000014615	32	0.937637	0.31734	1.13389	0.112467	CALR	Sus scrofa calreticulin (CALR), mRNA. [Source:RefSeq mRNA;Acc:NM_001174133]|2|ENSSSCG00000013746|ENSSSCT00000015020	2.65819e+07	24145368	30308808	26871718	25001572	2.49241e+07	24191482	26087852	23386068	26102618	24977760	24799098	30140868	24099874	31438306	31475998	30128968	33722936	29979126	24.5252	24.8532	24.6796	24.5755	24.528	24.6369	24.4791	24.6377	24.5741	24.5638	24.5225	24.906	24.9077	24.8446	25.0072	24.8375	27	31	29	28	26	26	30
>ENSSSCP00000017566	17	0.846687	0.143087	0.837691	0.166118	CALU	calumenin [Source:HGNC Symbol;Acc:1458]|18|ENSSSCG00000016581|ENSSSCT00000018052	9.71296e+06	7905821	10856456	11057159	9032411	8.22384e+06	6851250	7.51447e+06	7944072	10329001	8246991	8457267	8.13646e+06	5315149	8643374	7665686	8511624	10842599	7.84034e+06	22.9145	23.372	23.3985	23.1067	22.7079	22.8412	22.9214	23.3002	22.9754	23.0118	22.3417	23.0432	22.87	23.021	23.3702	22.9025	16	17	17	16	15	15	16
>ENSSSCP00000009730	15	1.06864	0.0729347	1.19595	0.00138549	CAMK2D	Sus scrofa calcium/calmodulin-dependent protein kinase II delta (CAMK2D), mRNA. [Source:RefSeq mRNA;Acc:NM_214381]|8|ENSSSCG00000009123|ENSSSCT00000009990	2.29472e+06	2.20133e+06	2.40248e+06	2365516	2209540	2.45222e+06	2.48883e+06	2.26394e+06	2639548	2.4236e+06	2.5306e+06	2.36682e+06	2.74436e+06	2815441	2.41447e+06	2.96536e+06	2.87385e+06	2723875	2673155	21.0699	21.1961	21.1737	21.0753	21.247	21.1104	21.3319	21.2087	21.271	21.1745	21.4249	21.2033	21.4998	21.4546	21.3772	21.3501	13	15	15	12	11	11	17
>ENSSSCP00000015217	3	1.0133	0.892322	1.11982	0.0499172	CAMLG	calcium modulating ligand [Source:HGNC Symbol;Acc:1471]|2|ENSSSCG00000014306|ENSSSCT00000015630	33078.3	31144.2	35201	31771	34197.1	33518.4	34357.9	28161.4	32360	37653.1	30078.1	38499.7	37041.7	37139.6	33451.3	36373.2	33514.7	39101.4	42670	14.9267	15.1033	14.9554	15.0616	15.0684	14.7814	14.9819	15.2005	14.8764	15.2326	15.1807	15.0298	15.1506	15.0325	15.2549	15.3809	2	1	2	2	0	1	3
>ENSSSCP00000000509	3	1.07967	0.116748	1.25422	0.00124279	CAND1	Uncharacterized protein [Source:UniProtKB/TrEMBL;Acc:F2Z5R6]|5|ENSSSCG00000028869|ENSSSCT00000000517	363468	376868	370868	329825	376312	392426	380538	381562	428890	352720	400821	410022	455867	466282	466409	447108	440967	419389	495049	18.5237	18.5005	18.3313	18.5216	18.5377	18.5416	18.7102	18.4282	18.6126	18.6453	18.8308	18.8312	18.7703	18.7503	18.6779	18.9172	40	41	41	40	38	38	43
>ENSSSCP00000014907	36	0.979391	0.528324	1.18931	0.00209394	CANX	calnexin [Source:HGNC Symbol;Acc:1473]|2|ENSSSCG00000014020|ENSSSCT00000015315	1.02734e+07	9900053	10997828	10093149	10102569	1.00617e+07	9930364	9546509	11043914	10152362	10120480	9576405	1.22182e+07	12112685	11882984	12762893	12319775	12247661	11983366	23.239	23.3907	23.2669	23.2682	23.2434	23.1865	23.3967	23.2753	23.2708	23.1911	23.53	23.5024	23.6055	23.5545	23.546	23.5145	32	36	32	34	31	28	34
>ENSSSCP00000003976	15	1.00633	0.890851	1.02235	0.71814	CAP1	CAP, adenylate cyclase-associated protein 1 (yeast) [Source:HGNC Symbol;Acc:20040]|6|ENSSSCG00000003672|ENSSSCT00000004068	7.52661e+06	8700018	7.77803e+06	6511057	7117322	7.57422e+06	7993075	7605005	7425928	7046867	6987088	8387386	7.69486e+06	7.83968e+06	8.18744e+06	7.18967e+06	7.28109e+06	7307167	8364105	23.0526	22.891	22.6345	22.7629	22.9303	22.8585	22.8241	22.7486	22.7363	22.9998	22.9024	22.965	22.7775	22.7957	22.8009	22.9958	17	17	17	17	16	16	17
>ENSSSCP00000001139	2	1.09894	0.387364	1.21189	0.134183	CAP2	Adenylyl cyclase-associated protein [Source:UniProtKB/TrEMBL;Acc:F1RUJ0]|7|ENSSSCG00000001068|ENSSSCT00000001163	17414	18677.2	21933	14930.7	14115.1	19137	20322.2	19007.9	21172.1	15947.3	19215.2	19157.2	21103.9	20084.9	21604.1	19055.6	22592	21789.4	21497.1	14.189	14.4208	13.866	13.785	14.3108	14.2143	14.3699	13.961	14.23	14.2256	14.2938	14.399	14.2179	14.4635	14.4113	14.3919	3	2	3	2	2	2	3
>ENSSSCP00000008796	12	0.853623	0.00492542	0.87142	0.0126063	CAPG	capping protein (actin filament), gelsolin-like [Source:HGNC Symbol;Acc:1474]|3|ENSSSCG00000008239|ENSSSCT00000009022	5.48013e+06	5.53747e+06	5052482	5788604	5541976	4.67797e+06	4.38325e+06	4.97642e+06	4446360	5.12594e+06	4.35745e+06	4.77838e+06	4.77549e+06	4.15646e+06	5.25524e+06	4715431	5021155	4817261	4687418	22.4008	22.2686	22.4648	22.402	22.0636	22.2467	22.0842	22.2894	22.0551	22.1881	21.9869	22.3253	22.169	22.2596	22.1998	22.1604	12	12	12	12	11	11	12
>ENSSSCP00000013824	29	1.00347	0.93964	1.17314	0.0107382	CAPN1	Calpain-1 catalytic subunit [Source:UniProtKB/Swiss-Prot;Acc:P35750]|2|ENSSSCG00000012999|ENSSSCT00000014210	1.366e+06	1.49771e+06	1.33024e+06	1.27214e+06	1.36392e+06	1.37075e+06	1.43909e+06	1.37868e+06	1.45326e+06	1.21814e+06	1.32021e+06	1.41509e+06	1.60251e+06	1.62363e+06	1.50217e+06	1.59547e+06	1633617	1558656	1.7015e+06	20.5143	20.3433	20.2788	20.3793	20.4567	20.3949	20.4709	20.2162	20.3323	20.4325	20.6308	20.5186	20.6055	20.6396	20.5719	20.6984	25	25	23	26	14	16	27
>ENSSSCP00000026311	21	0.922347	0.0889234	1.04607	0.259185	CAPN2	calpain 2, (m/II) large subunit [Source:HGNC Symbol;Acc:1479]|GL894320.1|ENSSSCG00000029411|ENSSSCT00000022751	3.87179e+06	4.25857e+06	3.71336e+06	3.77025e+06	3.745e+06	3.57114e+06	3.52866e+06	3.66288e+06	3.84869e+06	3.26583e+06	3.50841e+06	3612354	4.05016e+06	4217053	3974094	4027851	3.97496e+06	3.88367e+06	4223343	22.0219	21.8243	21.8462	21.8365	21.7507	21.8045	21.8759	21.639	21.7424	21.7845	22.0078	21.9222	21.9416	21.9225	21.889	22.01	18	20	19	20	17	18	20
>ENSSSCP00000021370	2	0.807143	0.190504	0.887147	0.454607	CAPN7	Sus scrofa calpain 7 (CAPN7), mRNA. [Source:RefSeq mRNA;Acc:NM_001097443]|13|ENSSSCG00000030697|ENSSSCT00000022738	34065.2	46047.5	28910.4	27524.8	33778.2	27495.5	27828.8	26268.4	28040.6	24506.4	27747.8	30580.9	30220.8	31657.5	29343.1	31024.5	31494.6	25836.1	31969.2	15.4908	14.8193	14.7484	15.0438	14.7643	14.681	14.7752	14.5809	14.7601	14.9003	14.9503	14.8407	14.9211	14.9428	14.6571	14.9644	1	1	2	2	0	1	2
>ENSSSCP00000025968	8	1.01151	0.533081	1.10178	0.00725578	CAPNS1	Sus scrofa calpain, small subunit 1 (CAPNS1), mRNA. [Source:RefSeq mRNA;Acc:NM_214318]|6|ENSSSCG00000030149|ENSSSCT00000031590	1.86285e+06	1.86073e+06	1.86758e+06	1.85645e+06	1.86666e+06	1.88429e+06	1.99833e+06	1.77456e+06	1.90871e+06	1.89419e+06	1.8418e+06	1888142	2.05246e+06	2.18858e+06	2.08508e+06	2.13575e+06	2010547	1.87889e+06	2.0159e+06	20.8274	20.8327	20.8241	20.832	20.9304	20.759	20.8642	20.8531	20.8127	20.8485	21.0616	20.9917	21.0263	20.9392	20.8414	20.943	6	8	8	7	8	7	9
>ENSSSCP00000014138	14	1.05577	0.402733	0.945431	0.511517	CAPRIN1	cell cycle associated protein 1 [Source:HGNC Symbol;Acc:6743]|2|ENSSSCG00000013305|ENSSSCT00000014531	779888	660630	864314	797626	796980	823378	816976	799846	760210	851359	810853	901023	737330	524875	703611	705993	764910	875954	848635	19.3335	19.7212	19.6054	19.6042	19.6399	19.6094	19.536	19.6994	19.6291	19.7812	19.0016	19.4244	19.4293	19.5449	19.7405	19.6948	12	13	13	13	6	10	13
>ENSSSCP00000014379	4	1.01538	0.951701	1.19821	0.406463	CAPS	calcyphosine [Source:HGNC Symbol;Acc:1487]|2|ENSSSCG00000013532|ENSSSCT00000014779	60693.2	39898	58618.7	81667.9	62588.2	61626.7	36793.9	36311.4	75842.5	94722.4	65275.6	60814.7	72723.2	50582.6	60299.2	98925.3	85883	91576.7	49072.3	15.284	15.8391	16.3175	15.9336	15.1672	15.1481	16.2107	16.5314	15.9943	15.8921	15.6264	15.8799	16.5941	16.3901	16.4827	15.5826	0	5	4	2	1	3	2
>ENSSSCP00000007226	6	1.00686	0.90096	0.931125	0.0948448	CAPZA1	capping protein (actin filament) muscle Z-line, alpha 1 [Source:HGNC Symbol;Acc:1488]|4|ENSSSCG00000006775|ENSSSCT00000007421	1.90001e+06	1.89612e+06	1.90756e+06	1.92433e+06	1.87201e+06	1.91303e+06	1.86875e+06	2.01093e+06	1.74589e+06	2041479	1.73748e+06	2.07366e+06	1.76914e+06	1.49912e+06	1.86998e+06	1.70777e+06	1.78338e+06	1.8494e+06	1.90521e+06	20.8546	20.8633	20.8759	20.8362	20.8336	20.9394	20.7355	20.9612	20.7286	20.9837	20.5157	20.8346	20.7037	20.7662	20.8186	20.8615	7	7	7	7	7	7	7
>ENSSSCP00000003793	2	0.964494	0.557166	1.00151	0.945616	CAPZB	Sus scrofa capping protein (actin filament) muscle Z-line, beta (CAPZB), mRNA. [Source:RefSeq mRNA;Acc:NM_001113444]|6|ENSSSCG00000003493|ENSSSCT00000003881	56659	54406.4	56824.8	51039	64365.6	54647.2	55849.9	51736.7	53687.6	55225.2	57138.8	54245	56744.5	55624.4	55997.3	62061.6	54813.5	58707.2	53262.7	15.7315	15.7942	15.6393	15.974	15.7693	15.6589	15.7123	15.753	15.8022	15.7272	15.7634	15.7731	15.9214	15.7422	15.8413	15.7008	13	13	12	14	10	13	13
>ENSSSCP00000021876	3	0.993482	0.981623	1.05411	0.912216	CARHSP1	calcium regulated heat stable protein 1, 24kDa [Source:HGNC Symbol;Acc:17150]|3|ENSSSCG00000026710|ENSSSCT00000026974	47431.1	31256.1	58680	62378.6	37409.7	47121.9	36247.1	38376.8	35509.7	69515.5	50234.2	52848.2	49997.4	21162.3	59919.4	46921.9	59002.1	70996.6	41982.4	14.9319	15.8406	15.9288	15.1911	15.1456	15.2279	15.1159	16.085	15.6164	15.6896	14.3692	15.8707	15.518	15.8485	16.1155	15.3575	2	2	3	2	0	0	2
>ENSSSCP00000014487	5	0.947827	0.418805	0.914722	0.202835	CARM1	coactivator-associated arginine methyltransferase 1 [Source:HGNC Symbol;Acc:23393]|2|ENSSSCG00000013633|ENSSSCT00000014888	154831	163320	147097	144667	164241	146753	138515	185436	142725	122152	164714	126978	141628	183050	134909	120701	141091	124409	145604	17.3173	17.1664	17.1424	17.3255	17.0797	17.5006	17.1229	16.8983	17.3296	16.9542	17.4819	17.0416	16.8811	17.1063	16.9247	17.1517	4	3	2	4	3	2	3
>ENSSSCP00000001170	12	0.999802	0.965967	1.01548	0.813179	CARMIL1	leucine rich repeat containing 16A [Source:HGNC Symbol;Acc:21581]|7|ENSSSCG00000001100|ENSSSCT00000001196	140642	126678	146761	153154	135972	140614	155276	149684	153835	115966	137105	131816	142819	158584	120329	153852	144860	140856	138434	16.9508	17.1631	17.2246	17.053	17.2445	17.1916	17.231	16.8233	17.0649	17.0082	17.2749	16.8766	17.2312	17.1443	17.1039	17.0788	5	7	4	2	1	2	7
>ENSSSCP00000005662	2	1.1443	0.140512	1.14767	0.118137	CARNMT1	chromosome 9 open reading frame 41 [Source:HGNC Symbol;Acc:23435]|1|ENSSSCG00000005271|ENSSSCT00000005806	19532.4	21735.7	18051.1	16935.9	21406.7	22350.8	22444.8	23225.8	20084.7	22901.6	26724.7	18723.3	22416.7	23860	18823.2	24360.5	23498.2	20258.4	23699.9	14.4078	14.1398	14.0478	14.3858	14.4541	14.5034	14.2938	14.4832	14.7059	14.1925	14.5423	14.2002	14.5723	14.5203	14.3062	14.5326	1	1	1	1	1	1	2
>ENSSSCP00000013668	19	0.877758	0.107094	0.956898	0.549017	CARS	cysteinyl-tRNA synthetase [Source:HGNC Symbol;Acc:1493]|2|ENSSSCG00000012857|ENSSSCT00000014053	663196	766217	610410	598871	677287	582126	602893	570282	587039	528854	601077	602612	634611	669654	706595	640466	590219	577492	623242	19.5474	19.2194	19.1919	19.3694	19.2015	19.1213	19.1631	19.0125	19.1972	19.2009	19.3531	19.4305	19.2888	19.1709	19.1394	19.2494	15	18	15	17	14	17	19
>ENSSSCP00000016724	6	1.24329	0.124168	1.41397	0.0391882	CASP3	caspase 3, apoptosis-related cysteine peptidase [Source:HGNC Symbol;Acc:1504]|15|ENSSSCG00000015783|ENSSSCT00000017185	111811	149964	90203.5	98783.7	108294	139014	166738	131831	123792	126643	141558	143519	158097	184103	175189	145749	137579	151634	154330	17.1943	16.4609	16.592	16.7246	17.3472	17.0083	16.9176	16.9504	17.111	17.1309	17.4902	17.4186	17.1531	17.0699	17.2102	17.2357	5	5	4	4	4	4	6
>ENSSSCP00000009746	5	1.18574	0.223365	1.18246	0.223453	CASP6	caspase 6, apoptosis-related cysteine peptidase [Source:HGNC Symbol;Acc:1507]|8|ENSSSCG00000009140|ENSSSCT00000010008	102439	103217	88916.9	139107	78515	121466	126144	113309	124211	139583	120751	104795	121130	109385	114963	129362	124754	131072	117245	16.6553	16.4402	17.0858	16.2607	16.9447	16.7899	16.9224	17.0908	16.8817	16.6772	16.7391	16.8108	16.9811	16.9287	17	16.8392	5	5	5	5	4	3	6
>ENSSSCP00000015070	3	0.767903	0.0250705	0.720125	0.00890379	CAST	Sus scrofa calpastatin (CAST), mRNA. [Source:RefSeq mRNA;Acc:NM_214067]|2|ENSSSCG00000014170|ENSSSCT00000015480	115991	126623	95698.9	112197	129446	89070	94473.2	98398.8	90707	83306	85575.2	81959.8	83528.2	89337.5	101026	78605.3	69653.4	72190.5	90356.3	16.9502	16.5462	16.7757	16.982	16.5276	16.5864	16.4689	16.3461	16.3849	16.3226	16.447	16.6244	16.2623	16.0879	16.1395	16.4633	21	26	24	23	16	18	25
>ENSSSCP00000014135	17	1.17544	0.00135987	1.22063	5.58529e-05	CAT	catalase [Source:HGNC Symbol;Acc:1516]|2|ENSSSCG00000013302|ENSSSCT00000014528	424482	415432	427069	439426	416002	498955	511457	461837	532642	532162	500740	454895	518137	556132	492026	535904	523439	484493	516830	18.6643	18.7041	18.7453	18.6662	18.9643	18.817	19.0228	19.0215	18.9337	18.7952	19.0851	18.9084	19.0316	18.9977	18.8861	18.9793	13	17	13	14	13	10	16
>ENSSSCP00000017622	9	0.757278	0.000169447	0.815457	0.0407484	CAV1	Sus scrofa caveolin 1, caveolae protein, 22kDa (CAV1), mRNA. [Source:RefSeq mRNA;Acc:NM_214438]|18|ENSSSCG00000016634|ENSSSCT00000018112	900945	949571	928224	892541	833444	682266	739426	653504	663113	728942	670503	638106	734682	820332	882214	631946	566164	628426	879007	19.8569	19.8241	19.7676	19.6687	19.496	19.3178	19.3389	19.4754	19.3549	19.2834	19.6458	19.7508	19.2694	19.1109	19.2614	19.7455	9	9	9	9	9	9	9
>ENSSSCP00000017623	5	0.961873	0.737571	0.930672	0.539466	CAV2	Sus scrofa caveolin 2 (CAV2), mRNA. [Source:RefSeq mRNA;Acc:NM_001123091]|18|ENSSSCG00000016635|ENSSSCT00000018113	88050.4	94253.1	88577.8	101534	67836.9	84693.2	108228	71789.2	82147.5	91957.2	73670.2	80366.8	81946	95756.4	100503	72456.2	61623.3	70697	90640.3	16.5243	16.4347	16.6316	16.0498	16.7237	16.1315	16.3259	16.4887	16.1688	16.2943	16.5471	16.6169	16.1448	15.9112	16.1094	16.4679	4	3	4	4	2	3	5
>ENSSSCP00000016038	7	0.931441	0.218534	0.967249	0.537004	CBL	Cbl proto-oncogene, E3 ubiquitin protein ligase [Source:HGNC Symbol;Acc:1541]|9|ENSSSCG00000015115|ENSSSCT00000016481	148470	137569	154460	138068	163782	138291	136674	143395	144715	136635	144339	123988	143607	153620	139502	146704	143590	141104	137123	17.0698	17.2369	17.075	17.3214	17.0604	17.1296	17.1429	17.06	17.1391	16.9198	17.229	17.0899	17.1625	17.1316	17.1064	17.0651	3	4	4	3	0	1	7
>ENSSSCP00000012833	2	0.509068	0.00404156	0.682598	0.101537	CBR3	carbonyl reductase 3 [Source:HGNC Symbol;Acc:1549]|13|ENSSSCG00000012053|ENSSSCT00000013185	30484.7	35686	29205.7	28495.4	28551.8	15518.8	15722.5	10080.4	11230.1	29648.7	13663.6	12767.3	20808.8	29388.5	32072.4	34985.2	10001.1	10411.5	7994.17	15.1231	14.834	14.7984	14.8013	13.9405	13.2993	13.4551	14.8557	13.7381	13.6402	14.843	14.969	15.0945	13.2879	13.3459	12.9647	0	0	0	0	0	0	2
>ENSSSCP00000018577	4	0.974648	0.982714	0.894447	0.558908	CBX1	chromobox homolog 1 [Source:HGNC Symbol;Acc:1551]|12|ENSSSCG00000017529|ENSSSCT00000019083	177168	120679	168925	229571	189496	172676	148577	167123	167414	197799	183615	171529	158467	122809	184662	163452	158146	171783	149953	16.8808	17.366	17.8086	17.5318	17.1809	17.3506	17.3531	17.5937	17.4863	17.3881	16.9061	17.4945	17.3185	17.2709	17.3902	17.1941	2	3	3	3	2	3	4
>ENSSSCP00000017701	4	0.945988	0.630062	0.792756	0.0718546	CBX3	chromobox homolog 3 [Source:HGNC Symbol;Acc:1553]|18|ENSSSCG00000016711|ENSSSCT00000018192	188074	158997	209441	221040	162816	177915	165739	177466	171303	197888	165064	190031	149096	113171	169789	152793	153109	173921	131795	17.2786	17.6762	17.7539	17.3129	17.3386	17.4372	17.3862	17.5943	17.3327	17.5359	16.7881	17.3734	17.2212	17.2242	17.4081	17.0079	4	7	8	5	3	3	6
>ENSSSCP00000014630	9	1.23318	0.322002	0.943091	0.848482	CC2D1A	Sus scrofa coiled-coil and C2 domain containing 1A (CC2D1A), mRNA. [Source:RefSeq mRNA;Acc:NM_001243031]|2|ENSSSCG00000013761|ENSSSCT00000015035	157180	77475.7	177038	174099	200107	193831	244250	187025	182218	151766	199471	198255	148235	80529.3	143148	96595.1	184878	200975	183283	16.2415	17.4337	17.4095	17.6104	17.898	17.5129	17.4753	17.2115	17.6058	17.597	16.2972	17.1271	16.5597	17.4962	17.6167	17.4837	3	7	4	3	0	1	9
>ENSSSCP00000010920	4	1.07288	0.0623132	0.980544	0.525591	CCAR1	cell division cycle and apoptosis regulator 1 [Source:HGNC Symbol;Acc:24236]|14|ENSSSCG00000010243|ENSSSCT00000011212	51583.7	54643.7	52065.7	51226.4	48399.2	55343	55759.8	57901.1	55086.7	50927.8	55820.2	56562.6	50580.1	51503.6	52036.9	51777.9	50292.1	49434.7	48435.7	15.7378	15.668	15.6446	15.5627	15.7669	15.8213	15.7494	15.6362	15.7685	15.7876	15.6524	15.6672	15.66	15.618	15.5932	15.5638	2	3	3	3	2	2	4
>ENSSSCP00000010279	25	0.984188	0.688215	0.900737	0.0314138	CCAR2	cell cycle and apoptosis regulator 2 [Source:HGNC Symbol;Acc:23360]|14|ENSSSCG00000009628|ENSSSCT00000010555	645232	618833	668013	605785	688296	635030	655985	658460	634487	575327	627246	658673	581185	599474	574194	535408	607583	591842	578607	19.2392	19.3495	19.2084	19.3927	19.3233	19.3287	19.2752	19.134	19.2587	19.3292	19.1933	19.1312	19.0303	19.2127	19.1749	19.1422	15	22	18	17	6	10	24
>ENSSSCP00000014771	7	0.954854	0.644885	0.899418	0.308781	CCDC124	coiled-coil domain containing 124 [Source:HGNC Symbol;Acc:25171]|2|ENSSSCG00000013891|ENSSSCT00000015177	176048	150571	163666	215108	174846	168100	131575	162059	151115	220438	172678	170735	158340	124919	176188	178817	149159	166956	154004	17.2001	17.3204	17.7147	17.4157	17.0055	17.3062	17.2053	17.75	17.3977	17.3814	16.9306	17.4268	17.4481	17.1865	17.3491	17.2326	4	5	4	5	2	2	6
>ENSSSCP00000024865	2	0.845436	0.134899	0.851904	0.280308	CCDC25	coiled-coil domain containing 25 [Source:HGNC Symbol;Acc:25591]|14|ENSSSCG00000024972|ENSSSCT00000027285	26134.3	22677.1	24159.4	32507.3	25193.5	22094.9	22569.2	20520.8	20108	25944.2	18915.5	24511.6	22263.9	10232.7	25265.2	23056.2	23291.6	27282.6	24455.3	14.4689	14.5603	14.9885	14.6208	14.4621	14.3248	14.2955	14.6631	14.2073	14.5812	13.3209	14.6249	14.4929	14.5075	14.7357	14.5779	1	0	0	1	0	0	0
>ENSSSCP00000018386	2	1.05831	0.946542	1.11814	0.35762	CCDC43	|12|ENSSSCG00000017352|ENSSSCT00000018890	78631.7	61019.1	83725.2	98307.2	71475.1	83216.4	56272.2	69763.7	59870.2	172643	61837.1	78912	87921.2	88763.9	92819.9	89180.9	73068.1	107476	76218.2	15.897	16.3534	16.585	16.1252	15.7801	16.0902	15.8696	17.3974	15.9162	16.268	16.4377	16.5021	16.4444	16.157	16.7137	16.2178	0	2	2	1	0	0	2
>ENSSSCP00000021016	9	1.0098	0.92576	1.04473	0.654352	CCDC47	coiled-coil domain containing 47 [Source:HGNC Symbol;Acc:24856]|12|ENSSSCG00000028698|ENSSSCT00000030857	159788	148850	167380	143515	179405	161353	184839	164614	186388	141634	141052	149592	166936	187080	177186	182919	141211	182693	130525	17.1835	17.3528	17.1308	17.4529	17.4959	17.3287	17.508	17.1118	17.1059	17.1907	17.5133	17.4349	17.4808	17.1075	17.4791	16.994	5	7	6	5	2	3	8
>ENSSSCP00000022299	2	0.753764	0.543084	0.998381	0.941189	CCDC58	coiled-coil domain containing 58 [Source:HGNC Symbol;Acc:31136]|13|ENSSSCG00000025107|ENSSSCT00000030693	16133	8060.85	30595.9	16874.5	9000.85	12160.5	24148	9124.69	5606.48	13968.8	9209.56	10905.4	16106.9	27006.9	13583.7	29778.6	8610.64	12604.6	5056.9	12.9767	14.901	14.0426	13.1358	14.5596	13.1556	12.4529	13.7699	13.1689	13.4128	14.721	13.7296	14.862	13.0719	13.6217	12.304	0	1	2	0	0	0	1
>ENSSSCP00000010887	12	0.922941	0.10547	0.874021	0.0134531	CCDC6	coiled-coil domain containing 6 [Source:HGNC Symbol;Acc:18782]|14|ENSSSCG00000010211|ENSSSCT00000011177	411712	384824	405646	414478	441900	379986	336338	361188	427762	384224	402406	367996	359845	344366	386036	400347	357884	345795	324639	18.5538	18.6299	18.6609	18.7534	18.3596	18.4624	18.7064	18.5516	18.6183	18.4893	18.3936	18.5584	18.6109	18.4491	18.3996	18.3085	10	12	9	9	6	7	10
>ENSSSCP00000016654	4	1.18013	0.0644921	1.23018	0.0319627	CCDC93	coiled-coil domain containing 93 [Source:HGNC Symbol;Acc:25611]|15|ENSSSCG00000015714|ENSSSCT00000017114	40504.1	43360	38045.4	34937.4	45673.6	47800	52191.1	49654.4	42786.9	44409.7	44442	53316	49827.5	55056.8	48053.8	46106.8	50757.9	47082.3	51907.1	15.4041	15.2154	15.0925	15.4791	15.6715	15.5996	15.3849	15.4386	15.4396	15.7023	15.7486	15.5524	15.4927	15.6313	15.5229	15.6636	1	2	2	2	0	1	4
>ENSSSCP00000027331	3	1.53171	0.174872	1.45291	0.267111	CCS	Copper chaperone for superoxide dismutase [Source:UniProtKB/TrEMBL;Acc:I3LT87]|GL896152.2|ENSSSCG00000022025|ENSSSCT00000031759	56811.6	42590.9	59335.7	67734	57585.8	87018.9	51043.3	59897.4	51624.5	71493.6	127351	160703	82541.9	128705	62316.1	148018	52149.6	61534.6	42528.4	15.3783	15.8566	16.0476	15.8134	15.6394	15.8702	15.6558	16.1255	16.9585	17.294	16.9737	15.9273	17.1754	15.6704	15.9091	15.3761	3	4	4	4	0	2	4
>ENSSSCP00000000527	31	0.95383	0.0775418	0.968749	0.228035	CCT2	Sus scrofa chaperonin containing TCP1, subunit 2 (beta) (CCT2), mRNA. [Source:RefSeq mRNA;Acc:NM_001170520]|5|ENSSSCG00000000496|ENSSSCT00000000535	5929944	6224755	5.86015e+06	5863992	5.77088e+06	5.65616e+06	5.84001e+06	5690016	5646881	5454780	5.36222e+06	5.94305e+06	5.74463e+06	5.72776e+06	5.97107e+06	5.98882e+06	5676082	5309173	5794841	22.5696	22.4825	22.4835	22.4604	22.4775	22.44	22.429	22.3791	22.3544	22.5028	22.4495	22.5096	22.5138	22.4365	22.3401	22.4663	30	31	30	29	29	29	31
>ENSSSCP00000006914	30	1.13864	0.131216	1.09976	0.366173	CCT3	chaperonin containing TCP1, subunit 3 (gamma) [Source:HGNC Symbol;Acc:1616]|4|ENSSSCG00000006487|ENSSSCT00000007106	6.38652e+06	7.61681e+06	5694218	6.29703e+06	5938022	7.27192e+06	8.05294e+06	7.50474e+06	6.26599e+06	6.92098e+06	7.54318e+06	7343690	7.02366e+06	7.70669e+06	9068042	6419409	5.63398e+06	6.42877e+06	6.88507e+06	22.8608	22.4411	22.5862	22.5016	22.9411	22.8394	22.5791	22.7225	22.8467	22.8081	22.8777	23.1124	22.614	22.4257	22.6161	22.715	28	27	28	27	26	24	30
>ENSSSCP00000008941	33	0.957157	0.448562	1.02691	0.730282	CCT4	chaperonin containing TCP1, subunit 4 (delta) [Source:HGNC Symbol;Acc:1617]|3|ENSSSCG00000008377|ENSSSCT00000009172	5.47827e+06	6.01327e+06	5235472	4.9984e+06	5.66592e+06	5.24356e+06	5823879	5.3713e+06	5109192	4.79624e+06	4.63246e+06	5728293	5.62568e+06	5987881	6548468	5327000	4.6506e+06	5268572	5.97154e+06	22.5197	22.3199	22.253	22.4339	22.4735	22.3568	22.2847	22.1935	22.1433	22.4497	22.5136	22.6427	22.3449	22.149	22.329	22.5097	32	32	31	33	31	29	34
>ENSSSCP00000026564	23	0.957783	0.242623	0.95733	0.253786	CCT5	chaperonin containing TCP1, subunit 5 (epsilon) [Source:HGNC Symbol;Acc:1618]|GL896487.1|ENSSSCG00000024126|ENSSSCT00000022242	3.74629e+06	4075429	3664953	3.63494e+06	3.60985e+06	3588134	3.69977e+06	3600171	3621438	3.49036e+06	3653496	3463575	3.58644e+06	3.75248e+06	3.71418e+06	3.60175e+06	3.43829e+06	3.36563e+06	3.64631e+06	21.9585	21.8054	21.7935	21.7835	21.819	21.7796	21.7881	21.7349	21.8008	21.7238	21.8394	21.8246	21.7803	21.7133	21.6824	21.798	20	23	22	23	21	20	23
>ENSSSCP00000008274	9	0.959031	0.380775	0.981216	0.69896	CCT6A	Uncharacterized protein [Source:UniProtKB/TrEMBL;Acc:F1RIU3]|3|ENSSSCG00000007746|ENSSSCT00000008493	1.87017e+06	2.07713e+06	1.75617e+06	1.7917e+06	1.8557e+06	1.79355e+06	1818503	1.90692e+06	1.86169e+06	1.72728e+06	1727890	1.71904e+06	1.83504e+06	1.98619e+06	1.86737e+06	1.90519e+06	1.73978e+06	1.67301e+06	1.83873e+06	20.9862	20.744	20.7729	20.8235	20.7943	20.8628	20.8282	20.7201	20.7206	20.7132	20.9216	20.8326	20.8615	20.7305	20.674	20.8103	24	26	24	24	22	20	26
>ENSSSCP00000008865	26	0.922654	0.301919	0.983592	0.851528	CCT7	chaperonin containing TCP1, subunit 7 (eta) [Source:HGNC Symbol;Acc:1622]|3|ENSSSCG00000008303|ENSSSCT00000009094	5.80931e+06	6.73225e+06	5.32124e+06	5.18205e+06	6001690	5.35998e+06	5407855	5.46585e+06	5697301	4954591	5272959	5361352	5.71399e+06	6.09221e+06	6.27195e+06	5.89532e+06	5317266	5349411	5.35778e+06	22.6827	22.3433	22.3051	22.5169	22.3666	22.382	22.4418	22.2403	22.3302	22.3542	22.5385	22.5805	22.4911	22.3423	22.3509	22.3532	26	26	25	26	26	25	26
>ENSSSCP00000021676	35	0.957678	0.330962	0.987356	0.783969	CCT8	chaperonin containing TCP1, subunit 8 (theta) [Source:HGNC Symbol;Acc:1623]|13|ENSSSCG00000026761|ENSSSCT00000023076	8.27555e+06	9094119	7.76252e+06	7.92016e+06	8.32541e+06	7.92532e+06	8158649	8.04364e+06	8.07872e+06	7.48712e+06	7910361	7.8734e+06	8.17091e+06	8.25068e+06	8576482	8457692	7402025	7.8498e+06	8488785	23.1165	22.8881	22.9171	22.9891	22.9599	22.9394	22.9457	22.836	22.9153	22.9086	22.9761	23.032	23.0118	22.8195	22.9042	23.0171	34	35	34	35	33	32	35
>ENSSSCP00000002096	5	1.00629	0.981151	0.80701	0.00176301	CD276	CD276 molecule [Source:HGNC Symbol;Acc:19137]|JH118811.1|ENSSSCG00000001917|ENSSSCT00000002146	223131	219942	218807	233131	220642	224535	210840	263389	204497	197761	222758	247965	180069	177209	193699	207945	159332	169737	172491	17.7468	17.7393	17.8308	17.7513	17.6858	18.0068	17.6417	17.5934	17.7651	17.9198	17.4351	17.5635	17.6658	17.2817	17.3729	17.3962	5	6	5	4	4	4	4
>ENSSSCP00000001885	3	0.976964	0.667346	0.924669	0.210826	CD2AP	Uncharacterized protein [Source:UniProtKB/TrEMBL;Acc:F1RQ14]|7|ENSSSCG00000001728|ENSSSCT00000001932	58404	55982.6	55887.4	65378.4	56367.5	57058.6	59874.7	53603.2	63298.9	49857.5	63351.3	52365.9	54004.3	64169.5	48080.5	59276.6	50587.5	50246.5	51665.3	15.7727	15.7702	15.9965	15.7826	15.8697	15.71	15.9499	15.6055	15.9511	15.6763	15.9696	15.5532	15.8552	15.6265	15.6167	15.6569	2	1	2	2	1	1	1
>ENSSSCP00000000451	3	1.09803	0.124499	0.996812	0.909324	CD320	Uncharacterized protein [Source:UniProtKB/TrEMBL;Acc:F1SL63]|5|ENSSSCG00000000423|ENSSSCT00000000457	30864.2	34295.8	29420.6	31873.8	27866.6	33889.8	33384.2	34484.5	33638	30882.9	35189	35760.1	30765.8	30196.9	31063.4	32848.8	37927.9	27560.8	24997.2	15.0657	14.8445	14.9601	14.7663	15.0269	15.0737	15.0378	14.9145	15.1028	15.1261	14.8821	14.9229	15.0036	15.211	14.7503	14.6095	2	2	2	2	2	2	3
>ENSSSCP00000012724	3	1.1548	0.00931459	1.15221	0.0104544	CD47	CD47 molecule [Source:HGNC Symbol;Acc:1682]|13|ENSSSCG00000011942|ENSSSCT00000013068	169585	177723	158564	163207	178848	195838	206994	195170	202352	187164	196274	187075	195398	203449	194649	198227	193685	182663	199716	17.4393	17.2747	17.3163	17.4484	17.6592	17.5744	17.6265	17.5139	17.5825	17.5133	17.6343	17.5705	17.5968	17.5634	17.4788	17.6076	3	3	3	3	3	3	4
>ENSSSCP00000014645	2	1.01527	0.792632	1.00556	0.89151	CD97	CD97 molecule [Source:HGNC Symbol;Acc:1711]|2|ENSSSCG00000013775|ENSSSCT00000015050	23868.8	26538.1	17131.2	21380	30425.9	24233.4	24648	23402	25222.1	24323.3	21681.3	26123.6	24001.6	28084.5	19767.7	21074.2	22129	26904.5	26049.6	14.6958	14.0643	14.384	14.893	14.5892	14.5143	14.6224	14.5701	14.4042	14.6731	14.7775	14.2709	14.3632	14.4337	14.7156	14.669	2	7	5	5	2	3	6
>ENSSSCP00000026157	2	0.838519	0.447342	0.936521	0.792436	CDC34	cell division cycle 34 [Source:HGNC Symbol;Acc:1734]|GL893220.1|ENSSSCG00000023616|ENSSSCT00000028657	56252	55031	51477.9	81688.1	36811	47168.4	39720.1	47872.7	35532	61337.3	46273.7	52274.5	52681.2	57691.7	45006.9	67356.6	52799.1	61974.5	31258.3	15.748	15.6517	16.3178	15.1678	15.2776	15.5469	15.1168	15.9045	15.4979	15.6738	15.8161	15.4579	16.0395	15.6882	15.9194	14.9319	1	2	2	1	0	1	1
>ENSSSCP00000014507	9	0.918057	0.0478021	0.870071	0.00962594	CDC37	Sus scrofa cell division cycle 37 homolog (S. cerevisiae) (CDC37), mRNA. [Source:RefSeq mRNA;Acc:NM_001123096]|2|ENSSSCG00000013647|ENSSSCT00000014908	2.07661e+06	1.98896e+06	2.24959e+06	2.00711e+06	2.06078e+06	1.90645e+06	1.98844e+06	1.92474e+06	1.88617e+06	1.80892e+06	1815346	2.01507e+06	1.8068e+06	1813308	1832626	1.70396e+06	1.84198e+06	1.7956e+06	1.85332e+06	20.9236	21.1012	20.9367	20.9748	20.9232	20.8762	20.847	20.7867	20.7918	20.9424	20.7902	20.8055	20.7005	20.8128	20.776	20.8217	9	9	9	9	8	8	9
>ENSSSCP00000003820	2	1.13792	0.0652419	1.17388	0.0238722	CDC42	Sus scrofa cell division cycle 42 (GTP binding protein, 25kDa) (CDC42), mRNA. [Source:RefSeq mRNA;Acc:NM_001078680]|6|ENSSSCG00000003520|ENSSSCT00000003910	818473	879687	736714	793224	864267	931355	1.09594e+06	924248	827516	922889	837928	979614	960793	1.04339e+06	879728	1.09532e+06	961649	894894	889776	19.7466	19.4907	19.5974	19.7211	20.0637	19.8179	19.6584	19.8158	19.6765	19.9019	19.9929	19.7467	20.0629	19.8752	19.7714	19.7631	9	9	9	9	8	8	9
>ENSSSCP00000002731	9	1.0991	0.627863	1.04816	0.761757	CDC42BPB	CDC42 binding protein kinase beta (DMPK-like) [Source:HGNC Symbol;Acc:1738]|7|ENSSSCG00000002523|ENSSSCT00000002802	847247	1.6789e+06	961890	105224	642978	931205	716582	1.26569e+06	565586	500514	528980	2.00987e+06	888053	1.14921e+06	1376118	567909	358010	254967	1.6221e+06	20.6791	19.8755	16.6831	19.2944	19.4508	20.2715	19.1094	18.9331	19.0129	20.9387	20.1322	20.3922	19.1153	18.4496	17.9599	20.6294	3	6	2	3	4	2	8
>ENSSSCP00000027300	2	0.878604	0.262826	0.933675	0.557014	CDC42EP1	CDC42 effector protein (Rho GTPase binding) 1 [Source:HGNC Symbol;Acc:17014]|5|ENSSSCG00000026108|ENSSSCT00000024506	28014.1	22192.2	27313.1	29150.6	33400.7	24613.3	23926.8	26346.2	23600.6	19688.7	25017.4	29100.2	26156.1	15851.8	30699.8	31489.3	26169.6	25484.6	27241.5	14.4378	14.7373	14.8312	15.0276	14.5463	14.6853	14.5265	14.2651	14.6106	14.8287	13.9524	14.9059	14.9426	14.6756	14.6373	14.7335	0	2	2	0	0	0	2
>ENSSSCP00000018272	4	1.3306	0.0558578	1.56757	0.011726	CDC42EP4	CDC42 effector protein (Rho GTPase binding) 4 [Source:HGNC Symbol;Acc:17147]|12|ENSSSCG00000017245|ENSSSCT00000018774	48399.9	35632.4	55855.1	48382.9	53729.4	64401.1	61290.6	49623.8	69849.3	76649.4	63637.3	65356.2	75870.1	69894.4	56050.4	75589.2	80593.7	98801	74292.2	15.1209	15.7694	15.5622	15.7134	15.9034	15.5987	16.092	16.226	15.9576	15.996	16.0929	15.7744	16.2059	16.2984	16.5922	16.1809	1	3	4	3	1	1	4
>ENSSSCP00000001861	11	0.974765	0.60297	0.865993	0.0200427	CDC5L	cell division cycle 5-like [Source:HGNC Symbol;Acc:1743]|7|ENSSSCG00000001708|ENSSSCT00000001908	195250	208016	185033	206394	181558	190323	198391	201611	171380	193609	172133	204816	169085	187433	179671	174003	157530	164341	151534	17.6663	17.4974	17.655	17.4701	17.598	17.6212	17.3868	17.5628	17.3932	17.644	17.516	17.455	17.4088	17.2653	17.3263	17.2093	5	7	6	6	2	3	11
>ENSSSCP00000004030	7	1.01066	0.798702	0.955759	0.388338	CDH2	cadherin 2, type 1, N-cadherin (neuronal) [Source:HGNC Symbol;Acc:1759]|6|ENSSSCG00000003722|ENSSSCT00000004122	1.24384e+06	1135115	1.37444e+06	1.22924e+06	1.23659e+06	1.2571e+06	1327983	1188007	1.2421e+06	1.29073e+06	1.18499e+06	1.30882e+06	1.18882e+06	1.33162e+06	1.10552e+06	1.12476e+06	1.20083e+06	1.22584e+06	1.14433e+06	20.1144	20.3904	20.2293	20.2379	20.3408	20.1801	20.2443	20.2998	20.1764	20.3198	20.3447	20.0763	20.1012	20.1956	20.2253	20.1261	16	16	15	15	10	14	17
>ENSSSCP00000017801	5	0.720792	0.00572778	0.512932	0.000117561	CDH6	cadherin 6, type 2, K-cadherin (fetal kidney) [Source:HGNC Symbol;Acc:1765]|16|ENSSSCG00000016806|ENSSSCT00000018296	59192.4	49868.6	58133.9	61282.9	67484.2	42665.4	40771.3	39124.2	51939.8	45353.8	41192.9	37610.4	30361.7	29031.9	27402	23066.8	30053.8	38414.4	34201	15.6058	15.8271	15.9032	16.0423	15.3153	15.2558	15.6646	15.4689	15.3301	15.1988	14.8254	14.742	14.4935	14.8753	15.2294	15.0618	3	7	3	5	1	3	4
>ENSSSCP00000027079	4	1.02938	0.687659	1.10187	0.254552	CDIPT	Sus scrofa CDP-diacylglycerol--inositol 3-phosphatidyltransferase (CDIPT), mRNA. [Source:RefSeq mRNA;Acc:NM_001167642]|3|ENSSSCG00000027629|ENSSSCT00000029641	108306	126830	97630.1	93016	115749	111488	117710	121352	114615	96816.7	110733	107700	119339	126341	125268	107967	116589	114735	125137	16.9525	16.575	16.5052	16.8206	16.8449	16.8888	16.8064	16.563	16.7567	16.7167	16.947	16.9347	16.7202	16.8311	16.8079	16.9331	2	3	2	3	2	2	4
>ENSSSCP00000010890	2	0.778634	0.0630158	1.00757	0.898898	CDK1	Sus scrofa cyclin-dependent kinase 1 (CDK1), mRNA. [Source:RefSeq mRNA;Acc:NM_001159304]|14|ENSSSCG00000010214|ENSSSCT00000011180	67176	82386.2	63118.8	54032.2	69166.6	52305.5	54978	43711.3	54802.5	49967.3	53816.2	56557.7	67684.3	77487.1	76124	66210.9	58526.4	59701	68056.6	16.3301	15.9458	15.7215	16.0778	15.7466	15.4157	15.742	15.6087	15.7158	15.7874	16.2417	16.2161	16.0148	15.8368	15.8655	16.0544	2	2	2	2	2	2	2
>ENSSSCP00000003635	3	0.975495	0.746198	0.95803	0.59604	CDK11B	|6|ENSSSCG00000003352|ENSSSCT00000003721	23605.7	20591.2	25637	26106.9	22087.6	23027.2	19252.2	22537.7	25156.5	21789	24025.2	25402.6	22614.9	23912.2	17080.5	28514.5	21193.3	21377.6	23611.6	14.3297	14.6459	14.6721	14.4309	14.2327	14.4601	14.6186	14.4113	14.5523	14.6327	14.5455	14.0601	14.7994	14.3713	14.3838	14.5272	2	2	1	2	0	2	3
>ENSSSCP00000019921	4	0.895731	0.594641	1.11625	0.506858	CDK5	Sus scrofa cyclin-dependent kinase 5 (LOC733700), mRNA. [Source:RefSeq mRNA;Acc:NM_001044621]|18|ENSSSCG00000024070|ENSSSCT00000026829	39506.5	44917.7	46851.9	42057.1	24199.2	35387.2	24452.6	41043	43677.4	36311.6	24660.2	42178.2	44099	47966.5	50046.7	42534.6	55004.8	37009.8	32031.4	15.455	15.5158	15.3601	14.5627	14.5777	15.3248	15.4146	15.1481	14.5899	15.3642	15.5497	15.611	15.3763	15.7473	15.1756	14.9672	1	2	2	3	1	1	3
>ENSSSCP00000018572	7	0.93135	0.246451	1.03277	0.647346	CDK5RAP3	CDK5 regulatory subunit associated protein 3 [Source:HGNC Symbol;Acc:18673]|12|ENSSSCG00000017524|ENSSSCT00000019078	145578	147665	130138	154396	150114	135584	136554	118630	136130	143149	119548	159496	150350	141570	168537	155317	121449	159835	155390	17.172	16.9897	17.2363	17.1957	17.0591	16.8561	17.0546	17.1272	16.8672	17.2832	17.1112	17.3627	17.2449	16.89	17.2862	17.2455	5	6	3	4	3	3	7
>ENSSSCP00000021121	2	1.12254	0.198364	1.162	0.109473	CDS2	CDP-diacylglycerol synthase (phosphatidate cytidylyltransferase) 2 [Source:HGNC Symbol;Acc:1801]|17|ENSSSCG00000030123|ENSSSCT00000023936	118330	113047	142373	105882	112020	132830	134023	124311	146105	126451	112104	153986	137500	145117	134411	110655	150079	149796	134941	16.7866	17.1193	16.6921	16.7734	17.0321	16.9236	17.1567	16.9482	16.7745	17.2324	17.1469	17.0363	16.7557	17.1954	17.1926	17.042	1	2	2	2	1	1	2
>ENSSSCP00000012403	4	0.94407	0.261935	0.901869	0.125032	CDV3	Uncharacterized protein [Source:UniProtKB/TrEMBL;Acc:F1SLA8]|13|ENSSSCG00000011637|ENSSSCT00000012737	958669	982464	862808	1.00394e+06	985463	905051	865581	846830	881299	1.01113e+06	836991	988480	864594	739241	1030298	760335	829359	955282	873050	19.906	19.7187	19.9372	19.9104	19.7233	19.6917	19.7493	19.9475	19.6749	19.9149	19.4957	19.9746	19.5363	19.6616	19.8656	19.7357	7	7	6	7	6	7	7
>ENSSSCP00000017465	6	0.741428	0.230656	0.827308	0.403506	CELA3A	Sus scrofa trypsinogen (LOC100302368), mRNA. [Source:RefSeq mRNA;Acc:NM_001162891]|18|ENSSSCG00000016483|ENSSSCT00000017947	571644776	872403072	471454432	386529408	556192192	4.23834e+08	403908608	336086976	555735104	395049664	408653984	443567680	4.72926e+08	659045248	783841856	346428032	328080512	338398432	381764160	29.7004	28.8125	28.526	29.051	28.5895	28.3243	29.0498	28.5575	28.6063	28.7246	29.2958	29.546	28.368	28.2895	28.3341	28.5081	7	6	7	7	7	7	7
>ENSSSCP00000021895	2	1.67153	0.632648	0.991348	0.748476	CELF2	Uncharacterized protein [Source:UniProtKB/TrEMBL;Acc:I3LCW7]|2|ENSSSCG00000022487|ENSSSCT00000024110	82572.2	66644.8	144334	56855.3	62454.5	138022	40111	158443	289864	42871.7	37689.1	259154	81857.8	34191.2	71541.6	112388	55122.4	180966	36938.1	16.0242	17.1391	15.795	15.9305	15.2917	17.2736	18.145	15.3877	15.2019	17.9835	15.0613	16.1265	16.7781	15.7504	17.4654	15.1728	2	1	0	1	0	1	0
>ENSSSCP00000013655	3	1.23083	0.00475037	1.14822	0.0456512	CEND1	Sus scrofa cell cycle exit and neuronal differentiation 1 (CEND1), mRNA. [Source:RefSeq mRNA;Acc:NM_213866]|2|ENSSSCG00000012845|ENSSSCT00000014040	64968.3	66944.6	69306.3	58316	65306.4	79965.1	87271.8	76225.9	80689.9	69738.1	77994.7	87870	74597.6	80587.6	70366.1	62374.7	72784.4	83457.8	78015.1	16.0307	16.0807	15.8316	15.9949	16.4132	16.218	16.3001	16.0897	16.2511	16.4231	16.2983	16.1026	15.9287	16.1513	16.3488	16.2515	2	2	3	2	2	2	2
>ENSSSCP00000019109	6	0.988966	0.877709	0.93812	0.399032	CENPV	centromere protein V [Source:HGNC Symbol;Acc:29920]|12|ENSSSCG00000018034|ENSSSCT00000019629	98119.2	114289	86333.7	94551	97303	97036.5	101465	104311	81616.8	94623	114148	86055.6	92047.6	99213.1	93979	94971.2	81076.4	94358.2	88688	16.8023	16.3976	16.5288	16.5702	16.6306	16.6705	16.3166	16.5299	16.8005	16.393	16.5982	16.5201	16.5352	16.307	16.5259	16.4365	3	4	4	4	0	2	5
>ENSSSCP00000017541	3	1.12854	0.163355	1.16356	0.0859304	CEP41	|18|ENSSSCG00000016556|ENSSSCT00000018026	35867.6	31288.7	41111.7	38195.3	32874.7	40478	41184.6	35043.9	45401.8	40394.4	36488.3	44355.1	41734.2	36768.4	44773.1	42360.6	43299.2	41164	42039.9	14.9334	15.3273	15.2211	15.0047	15.3298	15.0969	15.4705	15.3019	15.1551	15.4368	15.1662	15.4503	15.3704	15.4021	15.3291	15.3595	2	2	3	1	1	1	3
>ENSSSCP00000007085	2	0.903776	0.151474	0.824129	0.0158498	CERS2	ceramide synthase 2 [Source:HGNC Symbol;Acc:14076]|4|ENSSSCG00000006644|ENSSSCT00000007280	32834	35284.2	29583.7	30981.5	35486.5	29674.6	29999	32491.6	25083	27771.7	28630.5	34071.6	27059.5	29301.3	26827	26781.9	28520.5	26154.6	24771.4	15.1067	14.8525	14.9191	15.115	14.8726	14.9878	14.6144	14.7613	14.8053	15.0563	14.8387	14.7114	14.709	14.7997	14.6748	14.5964	3	2	2	2	1	1	2
>ENSSSCP00000008964	2	1.05998	0.618998	1.14909	0.356762	CFAP36	coiled-coil domain containing 104 [Source:HGNC Symbol;Acc:30540]|3|ENSSSCG00000008400|ENSSSCT00000009197	10918.3	7907.52	11907.8	13122.6	10735.3	11573.2	9041.35	10264.8	11477.3	13107.1	12573.3	12975.1	12546.2	14798.2	8593.99	11318.3	14327.2	14522.4	11716.9	12.949	13.5396	13.6798	13.3901	13.1423	13.3254	13.4865	13.6781	13.6181	13.6635	13.8531	13.0691	13.4664	13.8065	13.826	13.5163	1	1	1	0	0	0	1
>ENSSSCP00000002141	11	0.946097	0.391497	0.911541	0.29048	CFL2	Sus scrofa cofilin 2 (muscle) (CFL2), mRNA. [Source:RefSeq mRNA;Acc:NM_001025215]|7|ENSSSCG00000001959|ENSSSCT00000002192	1.32363e+06	1306787	1.20028e+06	1.47337e+06	1.3141e+06	1.25229e+06	1.05096e+06	1.28469e+06	1.16059e+06	1.50843e+06	1.21273e+06	1.29632e+06	1.20655e+06	811166	1.4629e+06	1224624	1.27304e+06	1.30693e+06	1.16062e+06	20.3176	20.1949	20.4907	20.3256	20.0033	20.293	20.1464	20.5246	20.2098	20.306	19.6296	20.4804	20.2239	20.2798	20.3177	20.1465	11	12	13	11	11	11	13
>ENSSSCP00000003480	8	0.944843	0.212164	0.934411	0.207222	CGN	Uncharacterized protein [Source:UniProtKB/TrEMBL;Acc:F1RH41]|6|ENSSSCG00000003208|ENSSSCT00000003563	390132	375548	430846	377723	376412	368614	351883	391081	369147	366794	345148	387629	364544	385069	322158	339960	364247	356538	419292	18.5186	18.7168	18.527	18.522	18.4247	18.5771	18.4938	18.4846	18.3969	18.5643	18.5548	18.2974	18.375	18.4746	18.4437	18.6776	5	7	7	6	5	5	9
>ENSSSCP00000008270	4	0.957599	0.736597	0.968426	0.792494	CHCHD2	coiled-coil-helix-coiled-coil-helix domain containing 2 [Source:HGNC Symbol;Acc:21645]|3|ENSSSCG00000007743|ENSSSCT00000008489	86672.8	74578.7	78129.8	115101	78881.4	82997.8	64680.2	80773.5	69064.2	116970	78265.3	88233.8	83936.2	66663.3	106959	75507.9	82807.1	107381	64298.6	16.1865	16.2536	16.8125	16.2674	15.981	16.3016	16.0757	16.8358	16.2561	16.429	16.0246	16.7067	16.2043	16.3375	16.7124	15.9725	1	3	4	3	1	2	2
>ENSSSCP00000017531	7	1.03268	0.826293	0.743727	0.126858	CHCHD3	coiled-coil-helix-coiled-coil-helix domain containing 3 [Source:HGNC Symbol;Acc:21906]|18|ENSSSCG00000016545|ENSSSCT00000018015	150821	156423	143898	199219	103742	155750	157153	131766	107193	207309	174290	156787	112169	117528	159166	106476	81820.2	108032	99994.9	17.2551	17.1347	17.604	16.6626	17.2618	17.0076	16.7098	17.6614	17.4111	17.2584	16.8426	17.2802	16.7002	16.3202	16.7211	16.6096	6	6	7	6	3	6	7
>ENSSSCP00000000743	10	1.01976	0.626712	0.97689	0.5884	CHD4	Chromodomain-helicase-DNA-binding protein 4; Uncharacterized protein [Source:UniProtKB/TrEMBL;Acc:F1SLR5]|5|ENSSSCG00000000697|ENSSSCT00000000759	132909	135006	142781	126125	127724	135535	143709	142348	135643	121002	134673	135836	129838	137834	115357	122542	128406	146251	128635	17.0427	17.1234	16.9445	16.9627	17.1328	17.1191	17.0495	16.8847	17.0391	17.0515	17.0726	16.8158	16.9029	16.9703	17.1581	16.9729	13	15	10	14	1	3	17
>ENSSSCP00000012209	2	1.24646	0.215959	1.441	0.0844025	CHDH	choline dehydrogenase [Source:HGNC Symbol;Acc:24288]|13|ENSSSCG00000011456|ENSSSCT00000012537	7451.49	5169.35	8795.36	9062.42	6778.84	9287.97	7617.14	9339.36	11094.4	12288.8	6627.11	8761.03	10737.6	9775.62	6027.6	13144.4	13760.7	10815.7	10901.5	12.3358	13.1025	13.1457	12.7268	12.895	13.1891	13.4375	13.5851	12.6942	13.0969	13.255	12.5574	13.6822	13.7483	13.4008	13.4122	0	1	1	0	0	0	1
>ENSSSCP00000014734	2	0.909954	0.342986	1.30111	0.458326	CHERP	calcium homeostasis endoplasmic reticulum protein [Source:HGNC Symbol;Acc:16930]|2|ENSSSCG00000013860|ENSSSCT00000015139	15555.7	15434.2	17016.8	13952.5	15819.2	14155	9158.27	12312	17474.7	19346.6	11824.9	14813.2	20239.7	43522.6	21469.4	11852.6	16114.7	13119.1	15359.5	13.9138	14.0547	13.7682	13.9494	13.1609	13.5878	14.093	14.2398	13.5295	13.8546	15.4095	14.39	13.5329	13.9761	13.6794	13.9068	1	1	1	1	1	1	1
>ENSSSCP00000013647	5	0.785842	0.00670036	0.736417	0.0038341	CHID1	chitinase domain containing 1 [Source:HGNC Symbol;Acc:28474]|2|ENSSSCG00000012837|ENSSSCT00000014032	103618	116589	106596	96266.4	95021.8	81427.6	87916.7	79424.8	92447	74040	82856.4	71880.7	76306.4	80526.8	72525	78235.4	74137.8	71883.4	80529.6	16.8311	16.7018	16.5547	16.536	16.4238	16.2773	16.4963	16.176	16.3383	16.1333	16.2972	16.1462	16.2555	16.1779	16.1334	16.2972	2	3	2	3	2	1	5
>ENSSSCP00000027165	3	1.06828	0.0968788	1.14933	0.0328739	CHMP2A	charged multivesicular body protein 2A [Source:HGNC Symbol;Acc:30216]|GL895345.1|ENSSSCG00000029362|ENSSSCT00000030728	67203	67653.8	64710.8	65923.1	70524.4	71791.7	71780.6	63279.1	76191	76314	69627.8	73557.6	77238.5	92764.4	81144.5	66377.3	73364.2	75852.7	73927.7	16.0459	15.9817	16.0085	16.1058	16.1313	15.9494	16.2173	16.2197	16.0874	16.1666	16.5013	16.3082	16.0184	16.1628	16.2109	16.1738	3	3	3	3	3	2	5
>ENSSSCP00000012782	2	0.959064	0.654796	1.15133	0.123098	CHMP2B	charged multivesicular body protein 2B [Source:HGNC Symbol;Acc:24537]|13|ENSSSCG00000011997|ENSSSCT00000013128	63991.1	76278.4	54435.2	61517.9	63732.7	61371.5	57467.2	61619.8	63695.9	62291.7	63648.8	59505.5	73675.1	77160.8	81317.8	71050.9	67880.2	71557.6	73083.5	16.219	15.7323	15.9087	15.9597	15.8105	15.9111	15.9589	15.9268	15.9578	15.8607	16.2356	16.3113	16.1166	16.0507	16.1268	16.1573	2	2	2	2	1	2	2
>ENSSSCP00000007744	9	0.92659	0.259403	1.03153	0.634238	CHMP4B	charged multivesicular body protein 4B [Source:HGNC Symbol;Acc:16171]|17|ENSSSCG00000007272|ENSSSCT00000007957	422799	431744	463050	427130	369272	391761	361864	362052	414784	462895	389082	359890	436128	508554	424405	377961	440891	430631	434326	18.7198	18.8208	18.7043	18.4943	18.4651	18.4658	18.662	18.8203	18.5697	18.4572	18.956	18.6951	18.5279	18.7501	18.7161	18.7284	7	8	9	7	8	5	8
>ENSSSCP00000011728	3	1.04351	0.526874	0.947271	0.5378	CHMP5	charged multivesicular body protein 5 [Source:HGNC Symbol;Acc:26942]|10|ENSSSCG00000010995|ENSSSCT00000012036	202501	166652	222306	220882	200163	211312	199894	218710	210301	205098	219066	214803	191823	179034	183749	200699	177908	230902	178648	17.3465	17.7622	17.7529	17.6108	17.6089	17.7387	17.6821	17.646	17.741	17.7127	17.4499	17.4874	17.6147	17.4408	17.8169	17.4468	3	3	2	4	1	1	4
>ENSSSCP00000015855	7	0.908493	0.0100945	0.939789	0.0554836	CHORDC1	cysteine and histidine-rich domain (CHORD) containing 1 [Source:HGNC Symbol;Acc:14525]|9|ENSSSCG00000014934|ENSSSCT00000016291	230756	222763	232700	229791	237770	209640	230400	211379	213037	211087	197228	194709	216862	210969	194667	224729	223093	218139	229574	17.7651	17.8281	17.81	17.8592	17.8138	17.6895	17.7007	17.6875	17.5895	17.571	17.6867	17.5707	17.7778	17.7673	17.7349	17.8086	6	7	7	6	4	5	7
>ENSSSCP00000008681	2	1.56159	0.52644	1.50544	0.454571	CIAO1	cytosolic iron-sulfur protein assembly 1 [Source:HGNC Symbol;Acc:14280]|3|ENSSSCG00000008130|ENSSSCT00000008907	547594	447072	697331	999645	46326.3	855114	952404	58665.8	1530219	1.03457e+06	656886	897940	824368	168997	365467	1.34044e+06	819521	1.51157e+06	740208	18.7701	19.4115	19.9311	15.4995	19.8612	15.8402	20.5453	19.9806	19.3253	19.7763	17.3666	18.4794	20.3543	19.6444	20.5276	19.4976	2	2	2	1	0	1	2
>ENSSSCP00000019807	13	0.931889	0.272119	0.764992	0.00643981	CIAPIN1	cytokine induced apoptosis inhibitor 1 [Source:HGNC Symbol;Acc:28050]|6|ENSSSCG00000029519|ENSSSCT00000028362	557755	558933	510057	627033	534997	519766	572988	472845	534818	580643	503576	453724	426678	400600	428364	424850	437298	437526	431430	19.0923	18.9603	19.2582	19.0292	19.1281	18.851	19.0287	19.1473	18.9418	18.7915	18.6118	18.7085	18.6966	18.7383	18.739	18.7188	11	11	11	10	6	9	11
>ENSSSCP00000014276	4	0.82048	0.050147	0.825559	0.047453	CIRBP	cold inducible RNA binding protein [Source:HGNC Symbol;Acc:1982]|2|ENSSSCG00000013427|ENSSSCT00000014671	600998	496992	632085	619024	655891	493107	489770	445808	534134	613591	465732	409605	496159	465856	467777	553318	507481	531888	450635	18.9229	19.2698	19.2396	19.3231	18.9017	18.7661	19.0268	19.2269	18.8291	18.6439	18.8295	18.8355	19.0778	18.953	19.0208	18.7816	4	4	4	4	3	3	5
>ENSSSCP00000009773	6	0.995803	0.896143	1.20332	0.00578166	CISD2	CDGSH iron sulfur domain 2 [Source:HGNC Symbol;Acc:24212]|8|ENSSSCG00000009164|ENSSSCT00000010036	155703	160639	149031	144524	168620	155050	150559	130859	181724	144001	168219	154937	187362	200190	168957	198790	196471	189533	170228	17.2935	17.1853	17.141	17.3634	17.2	16.9977	17.4714	17.1357	17.36	17.2413	17.611	17.3663	17.6009	17.584	17.5321	17.3771	5	6	5	5	5	5	5
>ENSSSCP00000000178	18	0.903501	2.99808e-05	0.905945	0.0136476	CKAP4	cytoskeleton-associated protein 4 [Source:HGNC Symbol;Acc:16991]|5|ENSSSCG00000000171|ENSSSCT00000000180	4.6496e+06	4.57451e+06	4.74465e+06	4.6493e+06	4629917	4.20091e+06	4.09736e+06	4191919	4.25792e+06	4.2512e+06	4.17486e+06	4232233	4.21228e+06	4.49688e+06	4608754	4.04751e+06	3.84543e+06	4150521	4.12459e+06	22.1252	22.1779	22.1486	22.1426	21.9663	21.9992	22.0217	22.0194	21.9933	22.013	22.1005	22.1359	21.9486	21.8747	21.9849	21.9758	16	16	16	15	15	15	17
>ENSSSCP00000026731	12	0.860707	0.0731093	0.927511	0.321496	CKAP5	Uncharacterized protein [Source:UniProtKB/TrEMBL;Acc:I3LRJ6]|2|ENSSSCG00000028351|ENSSSCT00000030061	183787	172573	184099	166657	211819	158187	195169	149745	159115	135706	160216	149168	170464	211565	147959	175821	164633	159337	163472	17.3968	17.4901	17.3465	17.6925	17.5744	17.1921	17.2797	17.0501	17.2897	17.1866	17.6907	17.1748	17.4237	17.3289	17.2817	17.3187	8	8	6	8	2	5	10
>ENSSSCP00000025941	8	1.03608	0.554711	1.02449	0.658406	CKB	creatine kinase, brain [Source:HGNC Symbol;Acc:1991]|GL895295.1|ENSSSCG00000021220|ENSSSCT00000024050	33285933	33641540	36319960	29106128	34076104	34486871	32916388	31606378	37244436	38583284	34365252	32205488	34101204	30520192	35180664	36581652	36063552	32842342	33418822	25.0037	25.1143	24.7948	25.0223	24.9723	24.9137	25.1505	25.2015	25.0344	24.9408	24.8633	25.0683	25.1246	25.104	24.9691	24.9942	9	9	9	9	9	9	10
>ENSSSCP00000021419	2	1.01206	0.959547	0.972132	0.647675	CKM	creatine kinase M-type [Source:RefSeq peptide;Acc:NP_001123421]|GL896419.1|ENSSSCG00000025268|ENSSSCT00000028562	6.79053e+06	6334261	7048983	7591646	6.18725e+06	6.87243e+06	6894395	5678913	8321848	7543148	7310270	5486008	6.6013e+06	6358408	6.52063e+06	7.21051e+06	7.0249e+06	6485632	6007697	22.5947	22.749	22.856	22.5609	22.717	22.4372	22.9885	22.8467	22.8015	22.3873	22.6002	22.6366	22.7817	22.744	22.6288	22.5184	2	2	2	2	1	2	2
>ENSSSCP00000005068	8	1.12646	0.171091	1.28816	0.0209202	CKMT1A	Uncharacterized protein [Source:UniProtKB/TrEMBL;Acc:F1SI77]|1|ENSSSCG00000004703|ENSSSCT00000005194	302800	304493	287755	353155	265797	341092	345668	295868	344599	410205	300928	349286	390055	384041	374647	385371	402577	402478	391215	18.2161	18.1345	18.4299	18.02	18.399	18.1746	18.3946	18.646	18.1991	18.414	18.5509	18.5152	18.5559	18.6189	18.6185	18.5776	5	9	7	7	6	6	9
>ENSSSCP00000016671	3	1.17626	0.149737	1.04949	0.61837	CLASP1	Uncharacterized protein [Source:UniProtKB/TrEMBL;Acc:F1RXX6]|15|ENSSSCG00000015731|ENSSSCT00000017131	13239.8	16807.7	13092.4	11050.6	12008.8	15573.5	15422.8	15698.4	17209.1	14638.2	15833.3	14639.2	13895.1	16796.3	11982.4	13016.2	14351.7	12724.1	14500	14.0368	13.6764	13.4318	13.5518	13.9128	13.9383	14.0709	13.8375	13.9507	13.8375	14.0359	13.5486	13.668	13.8089	13.6353	13.8238	3	2	3	4	0	1	5
>ENSSSCP00000011984	9	0.859408	0.591035	0.935183	0.910885	CLASP2	cytoplasmic linker associated protein 2 [Source:HGNC Symbol;Acc:17078]|13|ENSSSCG00000011236|ENSSSCT00000012303	144698	230648	114252	110921	122973	124355	113502	126746	144259	117633	116125	127866	135320	141161	122551	117011	139672	138227	153295	17.8153	16.8019	16.7592	16.908	16.7924	16.9516	17.1383	16.8439	16.8253	16.9643	17.107	16.903	16.8363	17.0917	17.0767	17.226	3	5	3	3	0	4	7
>ENSSSCP00000007296	3	0.889116	0.439696	0.996855	0.910459	CLCC1	Uncharacterized protein [Source:UniProtKB/TrEMBL;Acc:F1S5Y7]|4|ENSSSCG00000006841|ENSSSCT00000007492	42449.5	57520.2	38045	39452.9	34780	37742.6	40977.3	38385	40051.8	32808.8	38516.1	35716.5	42316	42663.4	43024.3	42612.3	40317.4	37724.2	47554.6	15.8118	15.2154	15.2678	15.086	15.3225	15.2283	15.2896	15.0018	15.2332	15.1243	15.3807	15.3929	15.379	15.2991	15.2032	15.5373	3	5	5	4	2	2	5
>ENSSSCP00000008569	2	0.962194	0.498434	1.08799	0.679118	CLCN7	Uncharacterized protein [Source:UniProtKB/TrEMBL;Acc:F1RG09]|3|ENSSSCG00000008024|ENSSSCT00000008793	51123.4	54210.1	47010.6	50682.7	52590.2	49190.6	46313.7	45782.8	51891.1	42985.8	62531.9	45638.6	55621.7	77070.8	73164.4	42106.8	38583.6	50171.8	52632.8	15.7263	15.5207	15.6292	15.6825	15.4992	15.4825	15.6632	15.3916	15.9323	15.478	16.2339	16.1589	15.3618	15.2357	15.6146	15.6837	0	0	0	0	0	0	1
>ENSSSCP00000022983	3	1.09183	0.296748	0.903805	0.183628	CLDN6	Sus scrofa claudin 6 (CLDN6), mRNA. [Source:RefSeq mRNA;Acc:NM_001161645]|3|ENSSSCG00000023743|ENSSSCT00000027667	35138	35663.4	33537.7	33382.4	37968.3	38364.8	38270.5	47401.7	30898.2	32928.5	39397.8	41292.1	31757.9	33014.6	30749.1	26407.7	25588	35015.8	39771.9	15.1222	15.0335	15.0268	15.2125	15.2239	15.5327	14.9152	15.0071	15.2658	15.3336	15.0108	14.9083	14.6887	14.6432	15.0957	15.2795	2	2	2	4	2	3	4
>ENSSSCP00000026179	8	0.907787	0.0632724	0.997892	0.914342	CLGN	Sus scrofa calmegin (CLGN), mRNA. [Source:RefSeq mRNA;Acc:NM_001243207]|8|ENSSSCG00000026360|ENSSSCT00000025519	126338	118313	130992	125887	130159	114688	104777	104997	129144	105451	126366	117392	126071	127916	113020	142230	132418	111451	129393	16.8522	16.9991	16.9418	16.9899	16.677	16.68	16.9786	16.6862	16.9472	16.841	16.9648	16.7862	17.1179	17.0147	16.7661	16.9814	3	7	6	6	2	2	7
>ENSSSCP00000013617	3	1.19588	0.0278692	1.22995	0.0256507	CLIC2	chloride intracellular channel 2 [Source:HGNC Symbol;Acc:2063]|X|ENSSSCG00000012808|ENSSSCT00000014001	25891.6	30008.3	24488.3	24744.3	24325.6	30963.2	30512.9	31364.1	28638.6	32020.9	27854.5	35388.2	31845.4	37555	29321.3	35328.4	33352.4	26864.2	28650.8	14.8731	14.5798	14.5948	14.5702	14.8971	14.9368	14.8057	14.9667	14.7656	15.111	15.1967	14.8397	15.1085	15.0255	14.7134	14.8063	0	1	1	0	0	0	3
>ENSSSCP00000020422	4	0.905791	0.333209	0.941798	0.562133	CLIC4	chloride intracellular channel 4 [Source:HGNC Symbol;Acc:13518]|6|ENSSSCG00000022314|ENSSSCT00000022251	911903	1.10535e+06	799630	798042	944590	825993	781026	910482	826323	823380	805726	809024	858828	854726	988352	774650	810761	780507	943975	20.0761	19.609	19.6061	19.8493	19.575	19.7963	19.6563	19.6512	19.6199	19.6258	19.7051	19.9147	19.5632	19.6289	19.5741	19.8484	4	4	4	4	4	4	4
>ENSSSCP00000018060	8	0.926061	0.0854495	0.882758	0.0110169	CLINT1	clathrin interactor 1 [Source:HGNC Symbol;Acc:23186]|16|ENSSSCG00000017047|ENSSSCT00000018560	114462	113287	119005	108365	117192	105999	114520	107158	107422	114460	100459	91975.2	101043	111827	97012.5	98864.4	89087.8	104465	104998	16.7896	16.8607	16.7255	16.8385	16.8052	16.7094	16.7129	16.8045	16.6162	16.489	16.7709	16.5659	16.5932	16.4429	16.6727	16.68	5	5	7	7	5	3	8
>ENSSSCP00000010455	17	0.853382	0.000257785	0.837751	9.61596e-05	CLIP1	CAP-GLY domain containing linker protein 1 [Source:HGNC Symbol;Acc:10461]|14|ENSSSCG00000009793|ENSSSCT00000010735	257981	258775	265337	246792	261019	220156	228940	207827	238009	216088	216615	213457	216124	206346	215323	224748	217173	216977	216174	17.9813	18.0175	17.9129	17.9938	17.8046	17.665	17.8607	17.7213	17.7248	17.7036	17.6547	17.7161	17.7779	17.7285	17.7272	17.7218	9	15	12	12	3	6	12
>ENSSSCP00000008243	11	0.986857	0.820981	0.862731	0.036556	CLIP2	CAP-GLY domain containing linker protein 2 [Source:HGNC Symbol;Acc:2586]|3|ENSSSCG00000007719|ENSSSCT00000008462	112191	98295.8	115828	117048	117590	110716	102061	109779	109361	115452	115402	112241	96790.3	88614.6	92423	105503	108645	98664.5	86892.5	16.5848	16.8216	16.8367	16.8434	16.6391	16.7442	16.7387	16.8169	16.8163	16.7762	16.4353	16.496	16.6869	16.7293	16.5902	16.4069	8	13	12	8	2	5	12
>ENSSSCP00000010114	7	1.10168	0.0930322	1.04798	0.481398	CLN5	ceroid-lipofuscinosis, neuronal 5 [Source:HGNC Symbol;Acc:2076]|11|ENSSSCG00000009471|ENSSSCT00000010384	109015	120139	99665.1	106132	110125	120100	131247	113778	126503	118356	122933	107784	114246	133099	116948	124393	102813	101342	106877	16.8743	16.6048	16.6955	16.7488	17.0019	16.7959	16.9488	16.8528	16.9075	16.7178	17.0221	16.8355	16.9245	16.6497	16.6289	16.7056	4	5	3	3	1	2	7
>ENSSSCP00000015801	2	0.717682	0.166016	0.687815	0.120336	CLNS1A	chloride channel, nucleotide-sensitive, 1A [Source:HGNC Symbol;Acc:2080]|9|ENSSSCG00000014881|ENSSSCT00000016235	41959.5	64003.8	36859.7	37113.8	29860.8	30113.6	31178.4	29986.6	24159.3	34819.9	32834.3	27703.2	28860.4	17397.3	30185.9	36145	31172	31746.3	26516.1	15.9659	15.1698	15.1797	14.866	14.9283	14.872	14.5603	15.0876	15.0029	14.7578	14.0866	14.8816	15.1415	14.928	14.9543	14.6946	1	2	3	1	0	0	1
>ENSSSCP00000003340	6	1.11499	0.0535079	1.1442	0.0265228	CLPTM1	cleft lip and palate associated transmembrane protein 1 [Source:HGNC Symbol;Acc:2087]|6|ENSSSCG00000003085|ENSSSCT00000003423	149365	147212	153357	135461	161428	166541	171257	165604	170439	165960	166419	159564	170903	187295	163678	154976	164899	174518	180053	17.1675	17.2265	17.0475	17.3005	17.3858	17.3374	17.3789	17.3405	17.3445	17.2838	17.515	17.3205	17.2417	17.3312	17.413	17.4581	4	5	4	4	3	3	5
>ENSSSCP00000005302	6	0.940393	0.0721789	0.945182	0.113387	CLPX	caseinolytic mitochondrial matrix peptidase chaperone subunit [Source:HGNC Symbol;Acc:2088]|1|ENSSSCG00000004927|ENSSSCT00000005437	100427	97799.5	97408.4	104219	102280	94440.6	90162.1	96885.9	86836.6	91944.8	102557	98257.4	94921.4	105100	98771.7	89205	97087.6	88551.2	90813.5	16.5775	16.5718	16.6693	16.6422	16.4602	16.564	16.406	16.4885	16.6461	16.5843	16.6814	16.5918	16.4448	16.567	16.4342	16.4706	2	4	2	2	1	2	7
>ENSSSCP00000014949	4	0.91129	0.367171	0.945873	0.538279	CLTB	clathrin, light chain B [Source:HGNC Symbol;Acc:2091]|2|ENSSSCG00000014058|ENSSSCT00000015357	179251	211116	159465	182808	163617	163350	114002	143793	176956	176157	146357	222833	169549	146987	253090	134648	142926	154636	185006	17.6877	17.2829	17.48	17.32	16.7987	17.1336	17.433	17.4265	17.1591	17.7656	17.1653	17.9493	17.0388	17.1249	17.2385	17.4972	3	5	4	4	2	2	3
>ENSSSCP00000023127	35	1.00864	0.857279	1.11593	0.181761	CLTC	Uncharacterized protein [Source:UniProtKB/TrEMBL;Acc:I3LGD4]|12|ENSSSCG00000022659|ENSSSCT00000027653	9.64532e+06	11097172	8694089	8755025	10035008	9.72863e+06	9599721	10175214	10402379	8848851	10076523	9269090	1.07635e+07	12978153	10697593	9852159	10069652	9828861	11154496	23.4037	23.0516	23.0617	23.2585	23.1946	23.2786	23.3104	23.0771	23.2645	23.144	23.6296	23.3508	23.232	23.2635	23.2286	23.4111	34	33	31	33	32	30	33
>ENSSSCP00000010325	8	1.03752	0.583288	1.13357	0.207294	CLU	Sus scrofa clusterin (CLU), mRNA. [Source:RefSeq mRNA;Acc:NM_213971]|14|ENSSSCG00000009668|ENSSSCT00000010601	2.50928e+06	3.01184e+06	2.29546e+06	2.42128e+06	2.30851e+06	2.60343e+06	2804348	2.47756e+06	2.78548e+06	2.67514e+06	2416408	2461620	2.84444e+06	2.50083e+06	3.65816e+06	2.63166e+06	2.48822e+06	2.72674e+06	3061011	21.5222	21.1304	21.2073	21.1385	21.4192	21.2405	21.4095	21.3512	21.2044	21.2312	21.254	21.8027	21.3275	21.2467	21.3787	21.5456	13	16	13	14	17	13	14
>ENSSSCP00000018895	7	0.897295	0.0462453	0.832359	0.0418381	CLUH	clustered mitochondria (cluA/CLU1) homolog [Source:HGNC Symbol;Acc:29094]|12|ENSSSCG00000017835|ENSSSCT00000019410	57593.9	60939.5	59603.3	57225	52607.7	51678.7	44419	51594.9	51925.8	56165.1	53915	52052.5	47938.8	57896.7	36232.4	42261.6	47264	55195.8	48782.2	15.8951	15.8631	15.8044	15.683	15.4389	15.6549	15.6642	15.7774	15.7184	15.6677	15.8212	15.145	15.3671	15.5285	15.7523	15.5741	2	3	6	2	0	1	6
>ENSSSCP00000004570	2	1.12782	0.210277	1.24105	0.0708121	CLVS2	clavesin 2 [Source:HGNC Symbol;Acc:23046]|1|ENSSSCG00000004232|ENSSSCT00000004677	23190	18944.4	27007.5	23434.3	23373.7	26154.3	26170.7	27404.7	30769.8	21789.3	25335.5	25455.5	28780	26645.5	21642.6	30737.4	32170.1	34625.4	26858.9	14.2095	14.7211	14.5163	14.5126	14.6757	14.7421	14.9092	14.4113	14.6289	14.6357	14.7016	14.4016	14.9077	14.9734	15.0795	14.7131	0	2	0	1	0	0	3
>ENSSSCP00000000601	7	1.0588	0.262616	1.01641	0.74534	CMAS	cytidine monophosphate N-acetylneuraminic acid synthetase [Source:HGNC Symbol;Acc:18290]|5|ENSSSCG00000000572|ENSSSCT00000000615	234439	258308	224548	225070	229828	248224	263831	269861	248308	217533	235692	254121	238285	249571	260452	225851	218474	221396	253963	17.9787	17.7767	17.78	17.8102	18.0093	18.0419	17.9218	17.7309	17.8465	17.9552	17.9291	17.9907	17.785	17.7371	17.7563	17.9543	6	6	6	7	5	4	8
>ENSSSCP00000020434	3	0.956285	0.540676	1.02112	0.778964	CMBL	carboxymethylenebutenolidase homolog (Pseudomonas) [Source:HGNC Symbol;Acc:25090]|GL896001.1|ENSSSCG00000020848|ENSSSCT00000024670	42430.9	48301.7	36534.7	42912.9	41974.1	40576	39087.3	38936.1	38355.6	43863.4	41715.3	41498.1	43327	38756.3	51573.6	40595.4	39810.1	44998.8	44227.8	15.5598	15.157	15.3891	15.3572	15.2544	15.2488	15.2272	15.4207	15.3483	15.3408	15.2421	15.6543	15.309	15.2808	15.4576	15.4327	1	1	2	2	2	1	2
>ENSSSCP00000005241	23	1.05465	0.420773	1.08469	0.13231	CNDP2	|1|ENSSSCG00000004870|ENSSSCT00000005376	9.34673e+06	10445197	8869214	8779764	9292747	9.85751e+06	11451456	8245125	10296813	9325605	9830758	9995331	1.01383e+07	10385873	10114225	10488619	10785145	9232835	9823070	23.3163	23.0804	23.0658	23.1477	23.449	22.9751	23.2957	23.1528	23.2289	23.2528	23.3081	23.2699	23.3223	23.3625	23.1383	23.2277	27	27	25	26	27	22	27
>ENSSSCP00000014468	12	1.2302	0.122267	0.928586	0.56061	CNN1	Sus scrofa calponin 1, basic, smooth muscle (CNN1), mRNA. [Source:RefSeq mRNA;Acc:NM_213878]|2|ENSSSCG00000013614|ENSSSCT00000014869	1.35387e+06	1.64219e+06	1.05436e+06	1236576	1.48234e+06	1.66553e+06	1.59544e+06	2.14326e+06	1.37632e+06	1.72124e+06	1.53879e+06	1.61816e+06	1.25718e+06	1.12015e+06	1.57788e+06	947320	860276	1.39392e+06	1.64356e+06	20.6472	20.0079	20.2379	20.4994	20.6055	21.0314	20.3924	20.715	20.5534	20.6259	20.0953	20.5896	19.8535	19.7144	20.4107	20.6484	11	11	11	11	10	10	13
>ENSSSCP00000027795	10	1.11673	0.232679	0.916588	0.297483	CNN2	calponin 2 [Source:HGNC Symbol;Acc:2156]|2|ENSSSCG00000030270|ENSSSCT00000027330	1.08941e+06	1.26875e+06	1.01888e+06	971994	1.098e+06	1.21658e+06	1.14741e+06	1.51945e+06	1.036e+06	1.12369e+06	1123445	1.34946e+06	998535	908206	1.1697e+06	882185	857598	1.05752e+06	1116001	20.275	19.9586	19.8906	20.0664	20.1299	20.5351	19.9826	20.0998	20.0995	20.364	19.7927	20.1577	19.7507	19.7099	20.0123	20.0899	8	11	9	10	8	7	10
>ENSSSCP00000007341	14	1.02331	0.553659	0.90931	0.0577506	CNN3	Uncharacterized protein [Source:UniProtKB/TrEMBL;Acc:F1S543]|4|ENSSSCG00000006887|ENSSSCT00000007541	4.58299e+06	4.73933e+06	4250847	4.69231e+06	4649472	4.68982e+06	4.53512e+06	4.80999e+06	4406176	5164738	4395571	4827309	4.16736e+06	3743380	4.63487e+06	3.92806e+06	3.88453e+06	4534744	4278576	22.1763	22.0193	22.1619	22.1486	22.1127	22.1976	22.0711	22.3003	22.0676	22.2028	21.8359	22.1441	21.9054	21.8893	22.1126	22.0287	12	14	13	13	12	12	14
>ENSSSCP00000021626	2	0.819928	0.00531578	0.717512	0.000294428	CNOT4	Uncharacterized protein [Source:UniProtKB/TrEMBL;Acc:I3LC53]|18|ENSSSCG00000021354|ENSSSCT00000029334	89702	88072.2	85932.5	99917	84886.2	73549.1	69256.5	83294.3	67797.2	71189.8	71134.7	78622.3	64362.2	57251.2	67108.2	67288.1	62859.5	72056.8	59609.6	16.4264	16.3909	16.6084	16.3732	16.0797	16.3459	16.0489	16.1194	16.1183	16.2627	15.805	16.0342	16.0381	15.9398	16.1368	15.8633	2	1	1	1	0	0	2
>ENSSSCP00000018459	9	1.05498	0.252847	1.02314	0.777396	CNP	2',3'-cyclic nucleotide 3' phosphodiesterase [Source:HGNC Symbol;Acc:2158]|12|ENSSSCG00000017420|ENSSSCT00000018964	154709	160262	148811	156277	153485	163215	180516	156532	162275	147769	182324	149874	158288	164568	153797	179454	169180	159574	123155	17.2901	17.1831	17.2537	17.2277	17.4618	17.2561	17.3081	17.173	17.4761	17.1934	17.3283	17.2307	17.4533	17.3682	17.2839	16.9101	5	6	6	5	2	4	11
>ENSSSCP00000000419	9	0.910616	0.747872	0.882249	0.619337	CNPY2	Sus scrofa canopy 2 homolog (zebrafish) (CNPY2), mRNA. [Source:RefSeq mRNA;Acc:NM_001185068]|5|ENSSSCG00000000394|ENSSSCT00000000425	470550	280406	521669	679177	400949	428491	291449	323041	378595	614792	457936	505130	415143	208112	483280	427609	443059	607413	321382	18.0972	18.9928	19.3734	18.6131	18.1529	18.3014	18.5303	19.2297	18.8048	18.9463	17.667	18.8825	18.7059	18.7571	19.2123	18.2939	6	9	8	7	3	4	6
>ENSSSCP00000001789	3	1.1594	0.252638	1.22547	0.154434	CNPY3	Sus scrofa canopy 3 homolog (zebrafish) (CNPY3), mRNA. [Source:RefSeq mRNA;Acc:NM_001110428]|7|ENSSSCG00000001651|ENSSSCT00000001836	40763.6	30744.3	51598.9	45447.3	35263.9	47261.5	50827.8	46976	48108.1	46919.6	48732.9	42004.5	49954.7	46389.4	45708.5	50761.9	49608.1	54578.5	52681.8	14.908	15.6551	15.4719	15.1059	15.6333	15.5196	15.554	15.5179	15.5726	15.3583	15.5015	15.4802	15.6315	15.5983	15.736	15.685	4	5	4	4	2	3	6
>ENSSSCP00000008912	3	1.00307	0.91426	0.970825	0.857736	CNRIP1	cannabinoid receptor interacting protein 1 [Source:HGNC Symbol;Acc:24546]|3|ENSSSCG00000008349|ENSSSCT00000009143	63879.7	48479.6	57682.6	85982.1	63374.6	64076	63614.2	57097.1	53992	83580.9	62104.7	64067.3	62016	43281.7	69004.9	63582.4	64745	81230.2	50251.9	15.5651	15.8158	16.3917	15.9516	15.9571	15.8011	15.7205	16.3509	15.9224	15.9673	15.4015	16.0744	15.9563	15.9825	16.3097	15.6169	2	3	3	3	1	2	3
>ENSSSCP00000018423	3	1.0577	0.357108	1.00381	0.947152	COA3	cytochrome c oxidase assembly factor 3 [Source:HGNC Symbol;Acc:24990]|12|ENSSSCG00000017388|ENSSSCT00000018928	45329.6	39799.6	49290.5	43176.6	49051.6	47945.1	46323.2	50058.6	52202.7	44850.2	47813.8	46421.8	45502.5	44415.9	39223.4	44381.8	49490.3	50515.6	44987.8	15.2805	15.589	15.398	15.582	15.4994	15.6113	15.6718	15.4528	15.5451	15.5025	15.4388	15.2594	15.4377	15.5949	15.6244	15.4572	2	2	2	2	1	1	1
>ENSSSCP00000018433	2	1.05029	0.362741	1.05804	0.407107	COASY	Sus scrofa CoA synthase (COASY), nuclear gene encoding mitochondrial protein, mRNA. [Source:RefSeq mRNA;Acc:NM_213789]|12|ENSSSCG00000017398|ENSSSCT00000018938	22467.1	20524.6	23765.8	21170.6	24407.3	23597	25889	22448.9	23219.5	21503.3	24332.3	24189.3	23771.1	28470.9	20925.7	24388.6	21548.8	24087.3	23205.1	14.3251	14.5366	14.3698	14.575	14.66	14.4544	14.503	14.3923	14.5706	14.5621	14.7972	14.353	14.5739	14.3953	14.556	14.5022	1	1	0	1	0	0	3
>ENSSSCP00000020535	3	0.914573	0.460122	0.878639	0.28444	COG3	Uncharacterized protein [Source:UniProtKB/TrEMBL;Acc:I3L924]|11|ENSSSCG00000023738|ENSSSCT00000027352	190306	154686	201819	232622	172099	174049	148856	139571	192724	249702	154479	158963	167211	149664	145994	168370	174358	209207	155670	17.239	17.6227	17.8276	17.3929	17.1836	17.0906	17.5562	17.9298	17.237	17.2783	17.1914	17.1555	17.3613	17.4117	17.6746	17.2481	0	2	0	1	0	0	3
>ENSSSCP00000020230	2	0.920232	0.221289	0.84482	0.068777	COG5	Uncharacterized protein [Source:UniProtKB/TrEMBL;Acc:I3L872]|9|ENSSSCG00000023193|ENSSSCT00000022439	31650.7	33396.2	30757.3	28677.8	33771.4	29126	34234.4	29790.4	27921.1	23003.4	31063.4	28743.2	26739.1	18889.8	32069.5	29769.8	27498.9	26680.9	25526	15.0274	14.9086	14.8076	15.0435	15.0632	14.8626	14.7691	14.4896	14.9229	14.8109	14.2053	14.9689	14.8616	14.7471	14.7035	14.6397	0	1	2	0	0	0	1
>ENSSSCP00000011512	2	1.15462	0.349383	1.02468	0.780159	COG7	component of oligomeric golgi complex 7 [Source:HGNC Symbol;Acc:18622]|10|ENSSSCG00000010799|ENSSSCT00000011815	16236.3	11985	19383.7	20892.6	12683.7	18746.8	16261	20094.5	24109.6	16146.7	18507.5	17361.4	16636.9	18568.2	14045.7	19950.3	14817.6	14831.8	17607.9	13.5489	14.2426	14.3507	13.6307	13.9891	14.2945	14.5573	13.9789	14.1758	14.0836	14.1805	13.7778	14.2841	13.855	13.8564	14.1039	0	1	1	1	0	0	2
>ENSSSCP00000007311	9	0.680761	6.35558e-05	0.493531	0.00097497	COL11A1	collagen, type XI, alpha 1 [Source:HGNC Symbol;Acc:2186]|4|ENSSSCG00000006857|ENSSSCT00000007510	206716	221169	202176	200476	203041	140724	120652	132134	144327	141296	141343	164592	102021	58473.9	103038	106901	121249	100225	122236	17.7548	17.6253	17.6131	17.6314	16.8805	17.0116	17.139	17.1084	17.1088	17.3285	15.8355	16.6528	16.7059	16.8876	16.6129	16.8993	5	9	7	8	3	3	6
>ENSSSCP00000004838	40	0.455755	2.32779e-07	0.275039	4.05462e-08	COL12A1	Uncharacterized protein [Source:UniProtKB/TrEMBL;Acc:F1RQI0]|1|ENSSSCG00000004484|ENSSSCT00000004955	21177839	22875754	20823392	19782740	21229470	9.6519e+06	9441417	10804837	8942438	9283841	9516517	9922376	5.82474e+06	5.4831e+06	7.31838e+06	5452351	5349497	5290564	6054552	24.4473	24.3117	24.2377	24.3396	23.1706	23.3652	23.0922	23.1463	23.182	23.2423	22.3866	22.8031	22.3784	22.351	22.335	22.5296	40	40	40	40	38	39	39
>ENSSSCP00000021563	2	0.90483	0.471579	0.781551	0.104478	COL15A1	|13|ENSSSCG00000028846|ENSSSCT00000027402	55051.7	69160.6	43019.5	49310.5	58716.2	49812.4	52190.8	54734.8	59619.9	42795.4	42332.7	47200.9	43025.7	33144.3	43811.2	45027.4	39721.4	58235.6	38214.4	16.0777	15.3927	15.5896	15.8415	15.6715	15.7402	15.8635	15.3852	15.3695	15.5265	15.0165	15.419	15.4585	15.2776	15.8296	15.2218	2	2	2	2	2	2	2
>ENSSSCP00000023415	4	0.791543	0.0618334	0.465604	0.000200156	COL16A1	Uncharacterized protein [Source:UniProtKB/TrEMBL;Acc:I3LH70]|13|ENSSSCG00000030160|ENSSSCT00000027870	76366.4	96334	70395.1	68094.3	70642	60447.3	55205.3	66858.9	56515	65196	61170.4	57738.1	35556.5	32642.4	29183.2	45871.8	31122.1	32420.6	42098.7	16.5558	16.1032	16.0552	16.1082	15.7525	16.0288	15.7863	15.9925	15.9005	15.8172	14.9945	14.8328	15.4853	14.9257	14.9846	15.3615	2	5	3	1	3	3	4
>ENSSSCP00000016253	20	0.556603	9.61888e-06	0.351065	4.98826e-08	COL1A2	Sus scrofa collagen, type I, alpha 2 (COL1A2), mRNA. [Source:RefSeq mRNA;Acc:NM_001243655]|9|ENSSSCG00000015326|ENSSSCT00000016699	2.84369e+06	2907149	2.62468e+06	2.75714e+06	3.08579e+06	1.58281e+06	1.55404e+06	1.98439e+06	1.40854e+06	1.5052e+06	1.5047e+06	1.53998e+06	998321	923774	1.11538e+06	962237	947025	919185	1.12233e+06	21.4712	21.3237	21.3947	21.5572	20.5676	20.9203	20.4258	20.5215	20.521	20.5545	19.8172	20.0891	19.876	19.853	19.81	20.0981	53	56	53	58	46	48	44
>ENSSSCP00000027199	13	0.711272	0.000420201	0.486041	1.37545e-07	COL2A1	collagen, type II, alpha 1 [Source:HGNC Symbol;Acc:2200]|GL893359.2|ENSSSCG00000025523|ENSSSCT00000031054	462517	449411	464779	463983	471894	328975	275125	323301	352035	356460	363770	303160	224802	210361	224497	246698	234368	225989	206899	18.7777	18.8262	18.8237	18.8481	18.0697	18.3025	18.4254	18.4434	18.4727	18.2097	17.6825	17.7763	17.9124	17.8384	17.7859	17.6586	11	12	10	12	6	10	12
>ENSSSCP00000018631	3	0.501301	4.83007e-05	0.330489	2.0458e-06	COL3A1	Uncharacterized protein [Source:UniProtKB/TrEMBL;Acc:F1RT61]|GL896296.2|ENSSSCG00000017579|ENSSSCT00000019137	638072	562386	730728	597494	661680	319866	323351	417858	259265	291243	299992	327490	210876	237510	246971	181797	207944	188767	202265	19.1012	19.479	19.1886	19.3358	18.3027	18.6727	17.9841	18.1519	18.1946	18.3211	17.8576	17.914	17.472	17.6658	17.5262	17.6259	7	7	6	9	5	5	5
>ENSSSCP00000006161	26	0.471789	6.91126e-07	0.308708	2.35009e-08	COL5A1	collagen, type V, alpha 1 [Source:HGNC Symbol;Acc:2209]|1|ENSSSCG00000005751|ENSSSCT00000006323	2.16816e+06	2.09521e+06	2.39865e+06	2.04541e+06	2.13339e+06	1.02292e+06	908535	1.15901e+06	941552	998884	1.03146e+06	1.09806e+06	669330	566704	719078	665496	671629	652794	740279	20.9987	21.1938	20.964	21.0247	19.7932	20.1445	19.8447	19.93	19.9763	20.0665	19.1122	19.4558	19.3441	19.3573	19.3163	19.4977	40	43	45	41	33	35	34
>ENSSSCP00000016990	25	0.627625	0.000598639	0.474824	2.88614e-05	COL5A2	Sus scrofa collagen, type V, alpha 2 (COL5A2), mRNA. [Source:RefSeq mRNA;Acc:NM_001105289]|15|ENSSSCG00000016035|ENSSSCT00000017460	2.12435e+06	2.39787e+06	1.81859e+06	2.07385e+06	2.20708e+06	1.33329e+06	1.05891e+06	1.40048e+06	1.41059e+06	1.3684e+06	1.38272e+06	1.37866e+06	1.00869e+06	1077568	1.17905e+06	1.10825e+06	889777	893352	904149	21.1933	20.7944	20.9839	21.0737	20.0141	20.4175	20.4279	20.3841	20.3991	20.3948	20.0393	20.1692	20.0798	19.7631	19.7689	19.7862	24	31	27	28	17	19	20
>ENSSSCP00000026963	2	0.927877	0.537479	0.754679	0.059017	COL6A1	collagen, type VI, alpha 1 [Source:HGNC Symbol;Acc:2211]|GL896433.1|ENSSSCG00000022506|ENSSSCT00000024347	15250.3	17425.5	15516.8	16492	11566.9	14150.4	13241.1	15285.1	15922.6	11034.7	12575	16844	11509.1	7749.29	13523.2	11738	14880.9	11126.2	10036.9	14.0889	13.9215	14.0095	13.4977	13.6927	13.8998	13.9588	13.4298	13.6183	14.04	12.9198	13.7232	13.5189	13.8612	13.4417	13.293	1	3	2	1	0	0	1
>ENSSSCP00000026262	11	0.824246	0.105082	1.12075	0.233522	COL6A2	Uncharacterized protein [Source:UniProtKB/TrEMBL;Acc:I3LQ84]|13|ENSSSCG00000028022|ENSSSCT00000023788	206951	255654	202804	197072	172273	170578	162097	164479	187057	172448	180903	156487	231939	242687	243993	229049	214218	216958	244731	17.9638	17.6297	17.5884	17.3943	17.3065	17.3275	17.5131	17.3958	17.4649	17.2557	17.8887	17.8965	17.8053	17.7087	17.7271	17.9008	5	8	5	8	6	6	7
>ENSSSCP00000014763	8	0.875517	0.0287868	0.86462	0.0689173	COLGALT1	Glycosyltransferase 25 domain containing 1; Uncharacterized protein [Source:UniProtKB/TrEMBL;Acc:F1S940]|2|ENSSSCG00000013883|ENSSSCT00000015169	121745	135097	114386	116145	121353	106590	112875	109182	108904	97642	102882	108053	105263	112429	136793	96868.3	90543.6	94885.1	100060	17.0436	16.8035	16.8256	16.8888	16.7844	16.7364	16.7327	16.5752	16.6506	16.7214	16.7787	17.0616	16.5637	16.4663	16.5339	16.6105	6	9	7	7	5	5	9
>ENSSSCP00000015129	2	1.38022	0.0691419	1.45121	0.0443596	COMMD10	COMM domain containing 10 [Source:HGNC Symbol;Acc:30201]|2|ENSSSCG00000014223|ENSSSCT00000015541	8393.39	7026.29	6316.77	10669.8	9560.73	11584.7	14660.1	9206.77	9781.22	12241.9	10462.4	13156.1	12180.6	14662.8	10362.7	13181.1	11648.4	13892.7	9336.04	12.7785	12.625	13.3812	13.2229	13.8396	13.1685	13.2558	13.5795	13.3529	13.6834	13.8399	13.3391	13.6862	13.5078	13.762	13.1886	1	1	0	0	0	0	2
>ENSSSCP00000011821	4	1.01029	0.892634	0.97008	0.825598	COMMD3	COMM domain containing 3 [Source:HGNC Symbol;Acc:23332]|10|ENSSSCG00000011082|ENSSSCT00000012129	41188.8	38049	40503	52012.5	34190.7	41612.4	39336.4	36367.3	36013.1	49037.2	40739	48181.5	39956.4	32578.5	45507.1	41596.6	38844	42371.8	38840.6	15.2156	15.3057	15.6666	15.0613	15.2636	15.1504	15.1362	15.5816	15.3141	15.5562	14.9916	15.4738	15.3442	15.2454	15.3708	15.2453	1	2	2	2	1	1	3
>ENSSSCP00000006297	2	1.10352	0.128872	1.17092	0.0612673	COMMD5	Uncharacterized protein; Uncharacterized protein [Source:UniProtKB/TrEMBL;Acc:F1RV39]|4|ENSSSCG00000028453|ENSSSCT00000006468	34154.9	37850.4	32811.1	30434.2	35524	37690.5	37867.2	34775.6	42496.8	35886.7	36877.9	38238.8	39992.8	48904.5	42880.2	39412.8	38776.7	35246.2	34736.2	15.208	15.0019	14.8934	15.1165	15.2087	15.0858	15.3751	15.1312	15.1705	15.2227	15.5777	15.388	15.2664	15.2429	15.1052	15.0842	1	2	0	1	0	1	2
>ENSSSCP00000007721	2	1.00654	0.888856	1.0991	0.187209	COMMD7	COMM domain containing 7 [Source:HGNC Symbol;Acc:16223]|17|ENSSSCG00000007251|ENSSSCT00000007934	45072.9	45262.2	44319.7	42703.5	48006	45367.7	46619.6	44261.3	50399.1	40786.1	45664	44476.3	49539.4	54454.9	51346.6	58426.8	42707.7	41621.4	48679	15.466	15.4357	15.3821	15.5509	15.5086	15.4338	15.6211	15.3158	15.4788	15.4407	15.7328	15.648	15.8343	15.3822	15.345	15.571	1	1	1	1	2	1	2
>ENSSSCP00000014125	6	1.42971	0.00262945	1.34721	0.00778284	COMMD9	COMM domain containing 9 [Source:HGNC Symbol;Acc:25014]|2|ENSSSCG00000013293|ENSSSCT00000014518	34819.2	31093.4	32822.9	34589.9	40770.8	49781.5	58044.2	42966.6	47407.3	48347.8	52100.7	49822.6	46908.9	44653.1	43920.7	52009	49336.5	44305.3	47228.5	14.9243	15.0024	15.0781	15.3152	15.8249	15.3909	15.5328	15.5612	15.669	15.6045	15.4465	15.4226	15.6665	15.5904	15.4352	15.5274	3	3	2	1	1	1	5
>ENSSSCP00000010805	13	0.981645	0.613734	0.99819	0.889125	COMT	catechol-O-methyltransferase [Source:HGNC Symbol;Acc:2228]|14|ENSSSCG00000010132|ENSSSCT00000011093	2.0605e+06	2.01357e+06	1.99448e+06	2.13403e+06	2.09992e+06	2.02268e+06	1.77438e+06	1.88182e+06	2.14396e+06	2.29964e+06	2.00573e+06	2.03053e+06	2.05677e+06	1.71673e+06	2.23624e+06	2.00418e+06	2.33697e+06	2.22401e+06	1.82248e+06	20.9413	20.9276	21.0251	21.0019	20.7589	20.8437	21.0318	21.133	20.9357	20.9534	20.7112	21.0926	20.9346	21.1562	21.0847	20.7975	12	12	13	12	10	10	13
>ENSSSCP00000006809	52	0.896477	0.188875	0.990782	0.943725	COPA	coatomer protein complex, subunit alpha [Source:HGNC Symbol;Acc:2230]|4|ENSSSCG00000006386|ENSSSCT00000006999	4.14909e+06	4820869	3800225	3683050	4.29221e+06	3.71956e+06	3.78554e+06	3.92823e+06	3.84088e+06	3.29063e+06	3.74734e+06	3.72477e+06	4.11084e+06	4266355	4372939	3.83749e+06	3.89905e+06	3.94357e+06	4345642	22.2009	21.8577	21.8125	22.0333	21.8521	21.9054	21.873	21.6499	21.8374	21.8287	22.0246	22.0602	21.8717	21.8947	21.9111	22.0511	50	51	48	50	43	46	51
>ENSSSCP00000014234	28	0.911356	0.164818	0.97769	0.723255	COPB1	Sus scrofa coatomer protein complex, subunit beta 1 (COPB1), mRNA. [Source:RefSeq mRNA;Acc:NM_001172366]|2|ENSSSCG00000013392|ENSSSCT00000014629	1.72511e+06	1.86623e+06	1.57744e+06	1.58235e+06	1.8744e+06	1.57219e+06	1.57541e+06	1660246	1.63084e+06	1.38209e+06	1.56841e+06	1.61612e+06	1.68662e+06	1.76212e+06	1741628	1.61875e+06	1.59816e+06	1.61922e+06	1.77984e+06	20.8317	20.5892	20.5936	20.838	20.5873	20.663	20.6372	20.3984	20.5809	20.6241	20.7489	20.732	20.6264	20.608	20.6269	20.7633	24	25	23	25	25	21	27
>ENSSSCP00000012432	37	0.870909	0.0988624	0.964117	0.62771	COPB2	coatomer protein complex, subunit beta 2 (beta prime) [Source:HGNC Symbol;Acc:2232]|13|ENSSSCG00000011662|ENSSSCT00000012767	2.82628e+06	3.28077e+06	2.63462e+06	2.51983e+06	2.86992e+06	2.46144e+06	2.4389e+06	2.64587e+06	2.51906e+06	2.25356e+06	2.50451e+06	2.40672e+06	2.72487e+06	2.61072e+06	2.87756e+06	2753212	2.57364e+06	2.64496e+06	2.88912e+06	21.6456	21.3292	21.2649	21.4526	21.2178	21.3353	21.2645	21.1038	21.2561	21.1986	21.316	21.4564	21.3927	21.2954	21.3348	21.4622	34	35	34	33	31	30	38
>ENSSSCP00000027288	7	0.866942	0.00122678	0.849852	0.000297624	COPE	Uncharacterized protein [Source:UniProtKB/TrEMBL;Acc:F1S7E0]|2|ENSSSCG00000027840|ENSSSCT00000027115	527965	538097	508185	521285	544294	457716	447270	433506	481324	451131	501555	431507	448692	431470	491171	448832	459471	422967	438244	19.0375	18.955	18.9917	19.054	18.7708	18.7257	18.8766	18.7832	18.936	18.719	18.7189	18.9059	18.7758	18.8096	18.6902	18.7414	10	11	11	11	9	10	11
>ENSSSCP00000012379	23	0.867319	0.0745672	0.953806	0.478673	COPG1	coatomer protein complex, subunit gamma 1 [Source:HGNC Symbol;Acc:2236]|13|ENSSSCG00000011616|ENSSSCT00000012713	1.18248e+06	1.29085e+06	1.08997e+06	1.06186e+06	1.28723e+06	1.02558e+06	1.0354e+06	1.07776e+06	1.01596e+06	997084	1.00351e+06	1.02379e+06	1.12785e+06	1.17101e+06	1183398	1.06748e+06	1.07418e+06	1.07257e+06	1.19849e+06	20.2999	20.0559	20.0182	20.2958	19.9818	20.0396	19.9544	19.9274	19.9366	19.9655	20.1593	20.1745	20.0258	20.0348	20.0326	20.1928	21	22	22	20	19	19	22
>ENSSSCP00000017538	19	0.95978	0.633349	0.982556	0.862582	COPG2	Coatomer subunit gamma [Source:UniProtKB/TrEMBL;Acc:F1SNE9]|18|ENSSSCG00000016553|ENSSSCT00000018023	554583	661829	488424	543951	524128	532278	546973	578896	518869	465727	548170	535030	544909	557311	578715	562901	541809	474063	554655	19.3361	18.8978	19.0531	18.9996	19.0611	19.1429	18.985	18.8291	19.0643	19.0293	19.0881	19.1425	19.1025	19.0474	18.8547	19.0812	17	18	14	17	8	11	22
>ENSSSCP00000005012	13	0.993513	0.804382	1.0733	0.00314787	COPS2	COP9 signalosome subunit 2 [Source:HGNC Symbol;Acc:30747]|1|ENSSSCG00000004652|ENSSSCT00000005137	389862	393595	384018	382166	399667	387333	419766	404966	392655	337860	405780	362969	418438	436500	408995	414755	430181	399779	420419	18.5864	18.5508	18.5438	18.6084	18.6792	18.6274	18.5829	18.3661	18.6303	18.4695	18.7356	18.6417	18.6619	18.7146	18.6088	18.6815	8	10	10	11	6	9	12
>ENSSSCP00000019126	11	1.04332	0.414276	1.18143	0.0275959	COPS3	COP9 signalosome subunit 3 [Source:HGNC Symbol;Acc:2239]|12|ENSSSCG00000018051|ENSSSCT00000019646	243106	256216	243918	213271	259018	253636	240454	260794	264830	236275	264595	254871	287212	290113	284648	288220	295766	271229	293293	17.967	17.896	17.7023	17.9827	17.8754	17.9925	18.0147	17.8501	18.0134	17.9594	18.1463	18.1188	18.1368	18.1741	18.0492	18.162	8	10	9	10	5	4	10
>ENSSSCP00000009855	14	1.04872	0.0839902	1.15517	0.000138448	COPS4	Sus scrofa COP9 constitutive photomorphogenic homolog subunit 4 (Arabidopsis) (COPS4), mRNA. [Source:RefSeq mRNA;Acc:NM_001105304]|8|ENSSSCG00000009241|ENSSSCT00000010121	595991	615505	595966	573891	598601	625028	635516	569391	648010	626434	635349	635467	688469	685339	709689	720571	666393	661117	687706	19.2314	19.1849	19.1304	19.1912	19.2776	19.1191	19.3057	19.2568	19.2772	19.2775	19.3865	19.4368	19.4588	19.346	19.3345	19.3914	13	13	14	13	9	9	15
>ENSSSCP00000006614	11	1.03276	0.396391	1.06425	0.139672	COPS5	Sus scrofa COP9 constitutive photomorphogenic homolog subunit 5 (Arabidopsis) (COPS5), mRNA. [Source:RefSeq mRNA;Acc:NM_001105300]|4|ENSSSCG00000006203|ENSSSCT00000006798	397215	372477	416700	378183	421499	410227	402214	396388	430765	419000	419036	393957	422736	405502	418483	436514	421842	422999	431078	18.5068	18.6686	18.5287	18.6852	18.6176	18.5966	18.7165	18.6766	18.6767	18.5877	18.6293	18.6748	18.7357	18.6863	18.6903	18.7176	6	10	8	7	6	4	11
>ENSSSCP00000000737	3	1.01952	0.744262	1.14658	0.139361	COPS7A	|5|ENSSSCG00000000691|ENSSSCT00000000753	102468	119883	89850.7	109382	90757	104469	105759	113604	102704	99545.3	104317	100884	117488	127933	120922	124891	108849	118017	104313	16.8713	16.4552	16.739	16.4697	16.6904	16.7937	16.6481	16.6031	16.6706	16.6223	16.965	16.8837	16.9303	16.732	16.8486	16.6706	7	7	7	7	7	4	7
>ENSSSCP00000023022	2	1.59833	0.00473787	1.43816	0.000132122	COPS7B	COP9 signalosome subunit 7B [Source:HGNC Symbol;Acc:16760]|15|ENSSSCG00000022392|ENSSSCT00000023412	3526.42	3185.48	3630.85	3745.76	3543.6	5636.38	7144.8	6794.43	4514.48	4481.99	4295.99	6586.61	5071.55	5709.68	4608.7	5261.57	5145.93	4449.59	5253.84	11.6373	11.8261	11.871	11.791	12.8027	12.7301	12.1403	12.1299	12.0688	12.6853	12.4792	12.1701	12.3613	12.3292	12.1195	12.3592	1	2	1	1	1	0	3
>ENSSSCP00000017295	5	1.10585	0.161468	1.17657	0.0640888	COPS8	COP9 signalosome subunit 8 [Source:HGNC Symbol;Acc:24335]|15|ENSSSCG00000016323|ENSSSCT00000017776	212421	184762	213678	241902	209342	234906	226691	221396	231047	267981	229270	233049	249928	209374	273388	233016	243256	292765	247770	17.4953	17.7051	17.8841	17.6755	17.7904	17.7563	17.8178	18.0318	17.8067	17.8303	17.6757	18.0606	17.8301	17.8921	18.1594	17.9186	4	3	3	4	3	2	4
>ENSSSCP00000000306	5	0.84395	0.0236522	0.858297	0.0265834	COPZ1	coatomer protein complex, subunit zeta 1 [Source:HGNC Symbol;Acc:2243]|5|ENSSSCG00000000290|ENSSSCT00000000311	348208	382758	318509	331631	359933	293870	300660	300102	297072	292721	282331	290331	298866	306675	303654	300433	288017	279290	315123	18.5461	18.281	18.3392	18.4574	18.1978	18.1951	18.1805	18.1592	18.107	18.1473	18.2264	18.2121	18.1967	18.1358	18.0914	18.2656	4	4	4	4	3	4	4
>ENSSSCP00000018574	3	0.943453	0.583322	1.06379	0.523979	COPZ2	coatomer protein complex, subunit zeta 2 [Source:HGNC Symbol;Acc:19356]|12|ENSSSCG00000017526|ENSSSCT00000019080	42083	33932.6	47348.2	39732.2	47318.9	39703.3	49374.6	35925.9	32337.9	40170.2	42064.7	38346.6	44767.6	46711	35026.4	43027.2	47893.3	46113.8	49834.1	15.0504	15.531	15.278	15.5301	15.5915	15.1327	14.9809	15.2938	15.3603	15.2268	15.5115	15.0962	15.393	15.5475	15.4929	15.6048	1	2	3	0	0	0	2
>ENSSSCP00000023624	2	1.32299	0.0105038	1.38629	0.00418927	COQ9	coenzyme Q9 [Source:HGNC Symbol;Acc:25302]|6|ENSSSCG00000025284|ENSSSCT00000023399	15172	13040.7	17418.7	15162.8	15065.8	20072.4	18979.6	21666.2	18906	16800.7	19215.4	24866.6	21032.8	23884.9	20541.6	17338.5	21533.5	21350.8	21547.2	13.6707	14.0883	13.8882	13.879	14.2122	14.4032	14.2066	14.0362	14.23	14.6019	14.5438	14.3263	14.0817	14.3943	14.382	14.3952	2	2	2	2	2	0	2
>ENSSSCP00000026549	6	1.25822	0.00779337	0.776055	0.023441	CORO1A	coronin, actin binding protein, 1A [Source:HGNC Symbol;Acc:2252]|GL892962.1|ENSSSCG00000029691|ENSSSCT00000031067	172342	183287	156462	179225	170393	216843	232377	167334	220286	221493	241103	218466	133747	121293	104635	177449	149737	142646	106720	17.4837	17.2554	17.4514	17.3785	17.8261	17.3524	17.749	17.7569	17.8793	17.7371	16.8881	16.675	17.437	17.1921	17.1221	16.7035	5	4	4	5	3	5	5
>ENSSSCP00000013737	19	1.03586	0.404448	1.05179	0.272996	CORO1B	coronin, actin binding protein, 1B [Source:HGNC Symbol;Acc:2253]|2|ENSSSCG00000012920|ENSSSCT00000014123	1.58377e+06	1.53418e+06	1.6853e+06	1.51848e+06	1597128	1.64057e+06	1.72661e+06	1.63343e+06	1.75868e+06	1.57777e+06	1.7069e+06	1.44001e+06	1.66579e+06	1.55311e+06	1.50748e+06	1.8475e+06	1.79292e+06	1.58512e+06	1708627	20.549	20.6846	20.5342	20.607	20.7195	20.6395	20.7461	20.5895	20.7029	20.4576	20.5667	20.5237	20.8171	20.7739	20.5962	20.7044	16	17	19	16	13	14	19
>ENSSSCP00000010611	5	1.04736	0.369139	1.05007	0.411595	CORO1C	Coronin [Source:UniProtKB/TrEMBL;Acc:F1RGA9]|14|ENSSSCG00000009944|ENSSSCT00000010896	515225	544872	550783	462778	502465	539624	561693	559938	543145	509335	574561	489072	541020	493623	578515	516972	508567	523044	625401	19.0556	19.0711	18.82	18.9387	19.0994	19.0949	19.051	18.9583	19.1321	18.8997	18.913	19.142	18.9797	18.9561	18.9966	19.2544	20	20	20	19	19	18	20
>ENSSSCP00000005337	8	1.30715	0.0058429	1.72315	0.000575007	CORO2B	coronin, actin binding protein, 2B [Source:HGNC Symbol;Acc:2256]|1|ENSSSCG00000004962|ENSSSCT00000005474	107954	108429	123999	98767.8	100620	141112	155554	143589	140100	125606	150990	130832	186021	198518	182408	187657	169717	186953	190871	16.7264	16.92	16.5918	16.6186	17.2471	17.1316	17.0961	16.9385	17.2041	16.9974	17.5989	17.4768	17.5177	17.3728	17.5123	17.5422	5	5	5	5	0	1	8
>ENSSSCP00000008483	21	1.06024	0.020707	1.04835	0.852858	CORO7	Coronin [Source:UniProtKB/TrEMBL;Acc:F1RK53]|3|ENSSSCG00000007944|ENSSSCT00000008707	450445	448190	442555	451008	460027	477581	472973	450481	457278	492810	495063	496881	472225	687927	409317	474023	534218	383361	344506	18.7738	18.7555	18.7828	18.8114	18.8514	18.7811	18.8027	18.9107	18.9173	18.9225	19.3919	18.6429	18.8546	19.0271	18.5483	18.3942	12	15	12	12	9	9	20
>ENSSSCP00000023743	7	0.974018	0.616935	0.805748	0.0257735	COTL1	coactosin-like 1 (Dictyostelium) [Source:HGNC Symbol;Acc:18304]|GL895339.1|ENSSSCG00000030543|ENSSSCT00000031309	1.71398e+06	1.87534e+06	1.56261e+06	1.70741e+06	1.71057e+06	1.66945e+06	1605950	1.66331e+06	1440202	1.83482e+06	1.61639e+06	1.85602e+06	1.38104e+06	1.01673e+06	1.71988e+06	1279870	1.36552e+06	1.50438e+06	1.39984e+06	20.8387	20.5755	20.7034	20.706	20.615	20.6656	20.4578	20.8072	20.6243	20.8238	19.9555	20.7139	20.2876	20.381	20.5207	20.4168	7	7	7	7	7	7	7
>ENSSSCP00000022554	6	0.938966	0.219474	0.973973	0.603873	COX4I1	cytochrome c oxidase subunit IV isoform 1 [Source:HGNC Symbol;Acc:2265]|6|ENSSSCG00000029034|ENSSSCT00000029520	1.04535e+06	1.11199e+06	985122	969446	1114857	981552	969551	1046232	1.00859e+06	891620	1.0264e+06	946916	1.01815e+06	1.11836e+06	1.08939e+06	1.04021e+06	929943	942107	988869	20.0847	19.9099	19.8868	20.0884	19.887	19.9968	19.9439	19.7661	19.9692	19.8529	20.093	20.0551	19.9884	19.8268	19.8455	19.9154	5	6	5	5	5	5	5
>ENSSSCP00000020264	3	1.00171	0.881024	0.989879	0.928684	COX5A	cytochrome c oxidase subunit Va [Source:HGNC Symbol;Acc:2267]|7|ENSSSCG00000024316|ENSSSCT00000027931	137491	77865.9	141943	229102	101053	137726	99935.7	105039	104564	219049	132477	165290	136100	63276.6	210574	113068	133803	217273	78602.6	16.2487	17.115	17.8056	16.6248	16.6087	16.6806	16.674	17.7409	17.0154	17.3346	15.9494	17.684	16.7868	17.0298	17.7291	16.2623	2	3	3	2	1	2	2
>ENSSSCP00000008748	2	0.941831	0.840027	0.871217	0.559753	COX5B	Sus scrofa mitochondrial cytochrome c oxidase subunit Vb (Cox5b), nuclear gene encoding mitochondrial protein, mRNA. [Source:RefSeq mRNA;Acc:NM_001007517]|3|ENSSSCG00000008195|ENSSSCT00000008974	232587	121992	191693	434370	182292	219057	94800.3	167458	129843	419807	190084	312353	202634	51338.3	370835	136588	169217	382722	105101	16.8964	17.5484	18.7286	17.4759	16.5326	17.3534	16.9864	18.6794	17.5363	18.2528	15.6477	18.5004	17.0595	17.3685	18.5459	16.6814	2	2	3	2	1	2	2
>ENSSSCP00000003131	5	1.11939	0.874236	1.13138	0.868666	COX6B1	Sus scrofa COX6B protein (COX6B), mRNA. [Source:RefSeq mRNA;Acc:NM_001097497]|6|ENSSSCG00000002907|ENSSSCT00000003212	106238	75562.5	69093.1	208496	71799	118922	62689.8	81623.4	47857	249328	89150.9	182880	120195	36145.3	245990	60027.6	92841.1	251148	35019	16.2054	16.0763	17.6697	16.1317	15.9359	16.3167	15.5464	17.9277	16.444	17.4805	15.1415	17.9082	15.8733	16.5025	17.9382	15.0959	1	2	5	3	1	1	2
>ENSSSCP00000006482	4	0.999515	0.956403	1.0141	0.801517	COX6C	cytochrome c oxidase subunit VIc [Source:HGNC Symbol;Acc:2285]|4|ENSSSCG00000006070|ENSSSCT00000006661	322398	384903	283829	303576	317284	322242	351190	327720	327671	288657	332570	305642	326943	359143	326899	314737	309801	306614	344460	18.5541	18.1147	18.2117	18.2754	18.4219	18.3221	18.3219	18.139	18.3433	18.2215	18.4542	18.3185	18.2638	18.241	18.2261	18.394	4	4	4	4	3	3	4
>ENSSSCP00000004833	2	0.941336	0.863411	0.887349	0.651419	COX7A2	Sus scrofa COX7A2 protein (COX7A2), mRNA. [Source:RefSeq mRNA;Acc:NM_001097484]|1|ENSSSCG00000004480|ENSSSCT00000004950	103515	72690.1	78144.3	175291	87936.2	97442.8	77759.8	83414.8	63027.6	148230	76191.3	136033	91854.4	56745.7	144753	75836	74174.4	138879	60738.6	16.1495	16.2539	17.4194	16.4242	16.2467	16.348	15.9437	17.1775	16.2173	17.0536	15.7922	17.1432	16.2106	16.1786	17.0835	15.8903	1	1	2	2	0	2	2
>ENSSSCP00000009034	2	1.00065	0.954663	0.973395	0.708754	COX7A2L	cytochrome c oxidase subunit VIIa polypeptide 2 like [Source:HGNC Symbol;Acc:2289]|3|ENSSSCG00000008466|ENSSSCT00000009268	45522.3	42592.9	42693.6	53282.6	43520.2	45551.8	46678	46910.4	40032.2	46043.9	46582.7	47063.6	44311.2	37858.7	45130	49654	43526.7	46158.3	43539.7	15.3783	15.3817	15.7014	15.4094	15.5105	15.5176	15.2889	15.4907	15.5075	15.5223	15.2083	15.4618	15.5996	15.4096	15.4943	15.41	2	2	2	2	2	2	2
>ENSSSCP00000030086	2	1.15885	0.120274	1.27472	0.0312175	CP	ceruloplasmin (ferroxidase) [Source:HGNC Symbol;Acc:2295]|13|ENSSSCG00000011700|ENSSSCT00000033091	86090.2	73743.2	94664.3	95408.5	80544.6	99765.9	91890.6	91900.3	104527	111380	115844	83053.3	109741	111066	102183	138012	111999	110562	84625.5	16.1702	16.5305	16.5418	16.2975	16.4876	16.4878	16.6735	16.7651	16.8218	16.3418	16.7611	16.6408	17.0744	16.7731	16.7545	16.3688	15	16	11	13	5	6	21
>ENSSSCP00000018857	11	0.875266	0.191108	0.903898	0.29969	CPD	carboxypeptidase D [Source:HGNC Symbol;Acc:2301]|12|ENSSSCG00000017799|ENSSSCT00000019371	135186	165193	127718	131218	116614	118324	103166	112921	125766	139638	117637	110812	122194	127172	114612	114800	125590	125283	125708	17.3338	16.9626	17.0016	16.8314	16.6546	16.785	16.9404	17.0913	16.844	16.7578	16.9564	16.8064	16.8088	16.9384	16.9348	16.9397	4	8	6	6	2	2	9
>ENSSSCP00000007780	13	1.05243	0.315982	1.06366	0.256498	CPNE1	Sus scrofa copine I (CPNE1), mRNA. [Source:RefSeq mRNA;Acc:NM_001143703]|17|ENSSSCG00000007306|ENSSSCT00000007994	610806	681944	570992	579476	610813	642830	695757	643138	672016	630709	629061	586299	649692	682049	677096	666652	611111	577484	683761	19.3793	19.1231	19.1444	19.2204	19.4082	19.2948	19.3581	19.2666	19.2628	19.1613	19.3795	19.369	19.3466	19.2211	19.1394	19.3831	11	12	12	11	8	7	13
>ENSSSCP00000006545	15	0.90614	0.341786	0.933416	0.51345	CPNE3	copine III [Source:HGNC Symbol;Acc:2316]|4|ENSSSCG00000006135|ENSSSCT00000006728	1.2736e+06	1.58134e+06	1.14007e+06	1.24897e+06	1.12403e+06	1.15406e+06	1.10877e+06	1.08875e+06	1.16039e+06	1.13862e+06	1.15644e+06	1.2714e+06	1.1888e+06	1.18164e+06	1.37895e+06	1214824	1.04487e+06	999278	1.31324e+06	20.5927	20.1207	20.2523	20.1002	20.0805	20.0542	20.1462	20.1189	20.1413	20.278	20.1724	20.3951	20.2123	19.9949	19.9305	20.3247	18	15	15	17	16	15	17
>ENSSSCP00000012762	7	0.988363	0.987237	1.07665	0.537748	CPOX	coproporphyrinogen oxidase [Source:HGNC Symbol;Acc:2321]|13|ENSSSCG00000011978|ENSSSCT00000013107	99973.8	79766.5	107254	126922	85952.9	98810.4	98439.6	84890.4	100036	111832	95456.9	102207	107637	91093.2	91982.6	131211	118226	116069	97238.6	16.2835	16.7107	16.9536	16.3913	16.587	16.3733	16.6102	16.771	16.5426	16.6411	16.4751	16.4891	17.0015	16.8512	16.8246	16.5692	4	5	5	4	1	1	5
>ENSSSCP00000022684	3	1.17416	0.301362	1.06743	0.519052	CPPED1	calcineurin-like phosphoesterase domain containing 1 [Source:HGNC Symbol;Acc:25632]|3|ENSSSCG00000024206|ENSSSCT00000028273	28708.1	36107.4	23247.1	26847.1	28630.5	33707.9	49174.8	30828.2	32224.7	37220.4	27934.1	24865.3	30643.7	32363.2	29952.1	29039.1	37132.7	26260	29115.2	15.14	14.5048	14.7125	14.8053	15.5856	14.912	14.9759	15.1838	14.7697	14.6018	14.9821	14.8704	14.8257	15.1804	14.6806	14.8295	1	1	2	1	1	2	2
>ENSSSCP00000006498	2	0.877753	0.140642	0.817308	0.0137602	CPQ	|4|ENSSSCG00000006087|ENSSSCT00000006678	69583.4	62242.7	75972.6	73972.8	66145.5	61077	60880.1	70261.4	47209.2	70731.2	66848.2	50532.1	56871.1	54412.6	48630.8	63433.3	59362.7	60464.3	54922.8	15.9256	16.2132	16.1747	16.0134	15.8937	16.1004	15.5268	16.1101	16.0286	15.6249	15.7317	15.5696	15.953	15.8573	15.8838	15.7451	5	4	4	5	3	4	4
>ENSSSCP00000024676	7	0.934738	0.0727747	0.874758	0.0243572	CPSF3	cleavage and polyadenylation specific factor 3, 73kDa [Source:HGNC Symbol;Acc:2326]|3|ENSSSCG00000020799|ENSSSCT00000027309	104542	107714	106753	105791	97911	97719.5	104439	100445	94643.9	87882.2	98671.6	100235	91449.1	107166	85937.5	93697.9	96736.9	79835.1	85321.5	16.7168	16.7039	16.6909	16.5792	16.6723	16.616	16.5302	16.4233	16.5903	16.613	16.7095	16.391	16.5157	16.5618	16.2847	16.3806	4	5	4	5	1	1	5
>ENSSSCP00000000520	6	0.924144	0.474725	0.887484	0.336225	CPSF6	cleavage and polyadenylation specificity factor subunit 6 [Source:RefSeq peptide;Acc:NP_001182260]|5|ENSSSCG00000000490|ENSSSCT00000000528	157639	195352	148981	149225	136998	145681	100458	170515	124120	131429	133524	214040	139902	160123	186818	124153	107665	90794.8	169858	17.5757	17.1848	17.1871	17.0638	16.6162	17.3795	16.9214	17.0039	17.0267	17.7075	17.2888	17.5113	16.9218	16.7162	16.4703	17.374	3	5	5	3	1	2	4
>ENSSSCP00000013915	13	0.891103	0.0649714	0.958595	0.421715	CPSF7	cleavage and polyadenylation specific factor 7, 59kDa [Source:HGNC Symbol;Acc:30098]|2|ENSSSCG00000013083|ENSSSCT00000014301	910186	1.02618e+06	885779	871876	856911	811069	822784	875168	871643	736370	758623	801829	872499	895646	928764	854809	870150	805224	880404	19.9688	19.7566	19.7338	19.7088	19.6502	19.7392	19.7334	19.4901	19.533	19.6129	19.7726	19.825	19.7052	19.7309	19.619	19.7478	7	12	10	9	5	6	11
>ENSSSCP00000013694	6	1.10593	0.0658808	1.06099	0.451432	CPT1A	Uncharacterized protein [Source:UniProtKB/TrEMBL;Acc:F1RY67]|2|ENSSSCG00000012881|ENSSSCT00000014080	97560.9	98921.7	104405	89380.5	97536.3	107895	96509.9	117820	104999	100549	110140	117354	103511	128952	110485	96276.3	91197.9	88370.7	105784	16.594	16.6718	16.4477	16.5737	16.5584	16.8462	16.68	16.6175	16.749	16.8405	16.9765	16.7535	16.5549	16.4767	16.4313	16.6908	4	4	3	4	2	2	5
>ENSSSCP00000004167	19	0.931693	0.178642	0.99891	0.990896	CPT2	carnitine palmitoyltransferase 2 [Source:HGNC Symbol;Acc:2330]|6|ENSSSCG00000003851|ENSSSCT00000004263	433722	467716	422506	396747	447921	404096	436870	422694	416762	371365	415990	360896	433250	460887	457520	434585	435042	399012	412452	18.8353	18.6886	18.5979	18.7729	18.7368	18.6893	18.6689	18.5025	18.6662	18.4612	18.8141	18.8035	18.7293	18.7308	18.6061	18.6539	13	18	14	16	13	14	18
>ENSSSCP00000023870	5	0.99357	0.842013	1.00062	0.96855	CRABP1	Sus scrofa cellular retinoic acid binding protein 1 (LOC100169745), mRNA. [Source:RefSeq mRNA;Acc:NM_001128492]|7|ENSSSCG00000021873|ENSSSCT00000025681	56867.9	38826.8	52963.2	86030.4	49651	56502.2	32155.1	26711.8	61565.9	96105.2	56852.5	65622.6	56903.2	31711.7	57656.6	53885.3	67881.3	77232	53052.4	15.2448	15.6927	16.3926	15.5995	14.9728	14.7052	15.9098	16.5523	15.7949	16.0019	14.9527	15.8152	15.7176	16.0507	16.2369	15.6951	3	5	6	3	0	2	3
>ENSSSCP00000000974	2	1.10802	0.540132	0.977613	0.924552	CRADD	Uncharacterized protein [Source:UniProtKB/TrEMBL;Acc:F1SQ12]|5|ENSSSCG00000000911|ENSSSCT00000000995	28337.9	43345	27677.1	15554.3	26775.3	31398.9	25869	28779.4	28284.4	27689.9	34417.2	43353.7	27703.5	23456	37721.8	25140.3	29969.2	28954	20979.9	15.4036	14.7564	13.925	14.7086	14.6589	14.8128	14.7877	14.7571	15.0708	15.4039	14.5177	15.2031	14.6177	14.8712	14.8215	14.3567	1	0	0	1	0	0	1
>ENSSSCP00000006075	10	1.00196	0.990949	1.08015	0.233736	CRAT	carnitine O-acetyltransferase [Source:HGNC Symbol;Acc:2342]|1|ENSSSCG00000005671|ENSSSCT00000006234	168928	165176	174003	173924	162607	169259	189905	164117	159388	157212	173676	171258	182466	178303	167697	210877	196667	192287	148968	17.3336	17.4088	17.4081	17.311	17.5349	17.3244	17.2822	17.2624	17.406	17.3858	17.444	17.3555	17.686	17.5854	17.5529	17.1846	4	9	4	7	2	2	9
>ENSSSCP00000012290	4	1.16202	0.00349675	1.22761	0.000748059	CRBN	cereblon [Source:HGNC Symbol;Acc:30185]|13|ENSSSCG00000011530|ENSSSCT00000012620	94823.1	92817.3	96065.8	94243.4	96165.7	110186	118530	106963	119198	112675	104812	98939	116406	117327	120864	128783	108495	105108	117858	16.5021	16.5517	16.5241	16.5532	16.8549	16.7068	16.863	16.7818	16.6774	16.5943	16.8402	16.883	16.9746	16.7273	16.6815	16.8467	2	3	2	3	2	2	4
>ENSSSCP00000006725	4	1.09525	0.568349	1.0967	0.301919	CREG1	cellular repressor of E1A-stimulated genes 1 [Source:HGNC Symbol;Acc:2351]|4|ENSSSCG00000006308|ENSSSCT00000006913	354373	350014	300484	420956	346037	388126	262335	332235	370188	552049	397608	414338	388641	414741	452801	370975	365072	400010	328244	18.4171	18.1969	18.6833	18.4006	18.0011	18.3418	18.4979	19.0744	18.601	18.6604	18.6619	18.7885	18.501	18.4778	18.6097	18.3244	2	3	3	3	2	2	4
>ENSSSCP00000012319	3	1.20547	0.11933	1.19413	0.185535	CRELD1	cysteine-rich with EGF-like domains 1 [Source:HGNC Symbol;Acc:14630]|13|ENSSSCG00000011560|ENSSSCT00000012651	16027.2	14003.5	20078.9	16330	13696.2	19320.3	17412.2	22970.6	16064.7	20012.2	18597.4	20864.8	19138.5	13239	20837.3	21910.6	22048.5	19538.2	17257.4	13.7735	14.2934	13.9952	13.7415	14.0878	14.4875	13.9716	14.2886	14.1828	14.3488	13.6925	14.3469	14.4193	14.4284	14.254	14.0749	1	2	3	0	0	1	3
>ENSSSCP00000001049	5	0.982085	0.888368	1.89825	0.0302375	CRELD2	cysteine-rich with EGF-like domains 2 [Source:HGNC Symbol;Acc:28150]|5|ENSSSCG00000000981|ENSSSCT00000001071	41633.9	24990.3	51709.1	56841.1	32995.2	40888	34466.9	39457.8	38215.4	48448.5	43174.3	41565.2	79031.4	55623.2	90201.2	97802.1	87464.8	86413.7	56683.4	14.6091	15.6581	15.7946	15.01	15.0729	15.268	15.2219	15.5642	15.3979	15.3431	15.7634	16.4609	16.5776	16.4164	16.399	15.7906	1	5	5	4	0	1	3
>ENSSSCP00000010768	8	0.976644	0.755456	0.93425	0.395554	CRKL	v-crk avian sarcoma virus CT10 oncogene homolog-like [Source:HGNC Symbol;Acc:2363]|14|ENSSSCG00000010095|ENSSSCT00000011056	453937	408658	447880	529187	430023	443335	397048	439497	446305	478938	459764	438457	424091	333778	447228	476177	445065	453783	388513	18.6405	18.7728	19.0134	18.7141	18.599	18.7455	18.7677	18.8695	18.8105	18.7421	18.3485	18.7707	18.8611	18.7637	18.7916	18.5676	7	7	7	8	5	7	8
>ENSSSCP00000025510	10	1.03707	0.410981	0.968219	0.472158	CRMP1	Uncharacterized protein [Source:UniProtKB/TrEMBL;Acc:I3LN38]|8|ENSSSCG00000022896|ENSSSCT00000026171	294437	304250	304904	266697	301896	305351	310963	319721	316659	319157	274169	291438	285079	268096	294843	270701	266244	294752	315841	18.2149	18.218	18.0248	18.2037	18.2464	18.2865	18.2726	18.2839	18.0647	18.1528	18.0324	18.1696	18.0463	18.0224	18.1691	18.2688	15	18	15	15	12	11	18
>ENSSSCP00000019713	4	0.824532	0.123888	0.824523	0.126197	CRTAP	cartilage associated protein [Source:HGNC Symbol;Acc:2379]|GL893256.1|ENSSSCG00000026368|ENSSSCT00000032312	90176.4	69945.5	89288.1	95488.3	105984	74353.3	72436.2	85706	73250.8	64031.4	75376.8	75318.5	74352.5	85410.3	80250.2	85374.7	65425.6	62536	67118.3	16.0939	16.4462	16.543	16.6935	16.1444	16.3871	16.1606	15.9665	16.2018	16.2007	16.3821	16.2922	16.3815	15.9976	15.9324	16.0344	2	4	3	3	2	2	4
>ENSSSCP00000015948	13	1.07359	0.578979	1.20972	0.252593	CRYAB	Alpha-crystallin B chain [Source:UniProtKB/Swiss-Prot;Acc:Q7M2W6]|9|ENSSSCG00000015025|ENSSSCT00000016389	83553482	67854392	80072600	110525952	75760984	8.97023e+07	71497384	83357600	83642872	119099464	82546664	98070016	1.01076e+08	62265156	119963704	98057272	106655360	126664112	92850560	26.0159	26.2548	26.7198	26.175	26.0914	26.3128	26.3177	26.8276	26.2987	26.5473	25.8919	26.838	26.5471	26.6684	26.9164	26.4684	12	15	15	15	11	11	12
>ENSSSCP00000010625	8	0.950128	0.71774	1.03864	0.940125	CRYBB2	crystallin, beta B2 [Source:HGNC Symbol;Acc:2398]|14|ENSSSCG00000009955|ENSSSCT00000010910	282301	194771	256729	410003	267699	268222	153537	149733	295135	434080	254696	322150	293209	114690	314016	266790	343743	502417	217597	17.5714	17.9699	18.6453	18.0303	17.2282	17.192	18.171	18.7276	17.9584	18.2974	16.8074	18.2605	18.0253	18.391	18.9385	17.7313	3	7	8	6	1	4	3
>ENSSSCP00000010624	4	0.927236	0.69623	1.0721	0.901933	CRYBB3	crystallin, beta B3 [Source:HGNC Symbol;Acc:2400]|14|ENSSSCG00000009954|ENSSSCT00000010909	46850.9	26663.7	43397.1	68374.6	48968.3	43441.8	21041.4	25764.1	51374.3	76952.8	44078.3	41440.1	50228.9	18741.3	49427.8	56259.7	58942.4	79073.8	38928.3	14.7026	15.4053	16.0612	15.5796	14.3609	14.6531	15.6488	16.2317	15.4278	15.3387	14.1939	15.593	15.7798	15.847	16.2709	15.2485	1	3	4	3	0	2	2
>ENSSSCP00000012567	10	1.00163	0.932123	1.10888	0.617441	CRYGS	crystallin, gamma S [Source:HGNC Symbol;Acc:2417]|13|ENSSSCG00000011796|ENSSSCT00000012908	4736449	3582681	4.57883e+06	6113660	4.67063e+06	4.74416e+06	3.41087e+06	3.40472e+06	4.51791e+06	7.16589e+06	5.12956e+06	4835998	5.25215e+06	2.96147e+06	6.02835e+06	5.93963e+06	6146501	6285750	4151211	21.7726	22.1265	22.5436	22.1552	21.7017	21.6991	22.1072	22.7727	22.2904	22.2054	21.4979	22.5233	22.5019	22.5513	22.5837	21.9851	9	10	10	9	8	8	9
>ENSSSCP00000009883	7	0.989024	0.907019	1.09087	0.395588	CRYL1	Sus scrofa CRY protein (CRY), mRNA. [Source:RefSeq mRNA;Acc:NM_213881]|11|ENSSSCG00000009268|ENSSSCT00000010149	96426	80340.1	101203	121479	82681.7	95367.7	113086	91321.9	111668	99061.4	61138.1	95930.5	105189	102145	92241.4	105673	118941	110227	101904	16.2938	16.6269	16.8903	16.3353	16.7871	16.4787	16.7689	16.596	15.8998	16.5497	16.6403	16.4931	16.6892	16.8599	16.7501	16.6369	5	6	5	3	3	2	6
>ENSSSCP00000008378	10	0.951017	0.585225	1.06651	0.621299	CRYM	crystallin, mu [Source:HGNC Symbol;Acc:2418]|3|ENSSSCG00000007849|ENSSSCT00000008599	528322	433239	555528	592518	532001	502443	437318	382881	604791	614371	519802	455493	563461	414747	512560	692206	660343	618284	482626	18.7248	19.0835	19.1765	19.0211	18.7383	18.5465	19.2061	19.2288	18.9876	18.7971	18.6619	18.9674	19.4008	19.3329	19.2379	18.8805	10	12	12	12	10	10	12
>ENSSSCP00000004089	9	1.1992	0.018296	1.16202	0.03588	CRYZ	Sus scrofa crystallin, zeta (quinone reductase) (LOC733653), mRNA. [Source:RefSeq mRNA;Acc:NM_001044584]|6|ENSSSCG00000003780|ENSSSCT00000004183	249734	241840	248611	281331	227153	299480	346705	264364	302532	309009	286181	288088	290196	286691	290787	291228	284402	277298	310770	17.8837	17.9235	18.1019	17.7933	18.4033	18.0122	18.2067	18.2373	18.1266	18.1361	18.1291	18.1496	18.1518	18.1176	18.0811	18.2455	6	7	7	6	7	5	8
>ENSSSCP00000019623	4	0.913065	0.00794799	1.02988	0.244404	CS	citrate synthase [Source:HGNC Symbol;Acc:2422]|5|ENSSSCG00000021091|ENSSSCT00000031652	825366	810939	813732	819446	857347	753613	739276	706000	824930	728458	774740	748274	850031	893982	826057	886226	857722	789102	847098	19.6292	19.6342	19.6443	19.7095	19.4958	19.4293	19.6539	19.4745	19.5634	19.5132	19.7699	19.6559	19.7573	19.7102	19.5899	19.6922	3	5	3	4	3	3	4
>ENSSSCP00000007202	26	0.863527	0.00284497	0.778691	0.000147635	CSDE1	cold shock domain containing E1, RNA-binding [Source:HGNC Symbol;Acc:29905]|4|ENSSSCG00000006752|ENSSSCT00000007397	1.11848e+06	1.07137e+06	1.13389e+06	1.18956e+06	1.07909e+06	965835	867347	973280	979469	1.0059e+06	1005943	963067	870948	868707	827658	947588	869416	861723	850594	20.031	20.1128	20.182	20.0414	19.7262	19.8925	19.9016	19.9401	19.9401	19.8773	19.7285	19.6587	19.8539	19.7297	19.7169	19.6981	21	25	23	23	21	20	26
>ENSSSCP00000007947	3	0.92771	0.14352	1.00115	0.98155	CSE1L	CSE1 chromosome segregation 1-like (yeast) [Source:HGNC Symbol;Acc:2431]|17|ENSSSCG00000007459|ENSSSCT00000008163	233837	250058	218909	232872	233506	216933	217107	224130	237654	208949	231998	181757	234106	244467	246016	239038	227818	210395	236901	17.9319	17.74	17.8292	17.8331	17.728	17.774	17.8585	17.6728	17.8238	17.4716	17.8993	17.9084	17.8669	17.7975	17.6827	17.8539	3	2	2	2	2	1	2
>ENSSSCP00000002078	10	1.10684	0.0235864	1.09422	0.0327572	CSK	c-src tyrosine kinase [Source:HGNC Symbol;Acc:2444]|7|ENSSSCG00000001900|ENSSSCT00000002128	212831	218131	199054	217320	216819	235571	254307	238006	241989	206434	236285	236403	232885	248105	243175	237451	234260	206635	227685	17.7348	17.6028	17.7295	17.7261	17.9562	17.8606	17.8846	17.6553	17.8502	17.8509	17.9206	17.8916	17.8573	17.8378	17.6567	17.7967	8	8	8	8	3	4	11
>ENSSSCP00000015364	6	0.87269	0.362765	0.831067	0.224665	CSNK1A1	Casein kinase I isoform alpha [Source:UniProtKB/Swiss-Prot;Acc:O19175]|2|ENSSSCG00000014435|ENSSSCT00000015780	82038.7	110765	69351	69805.5	78233.7	71594.4	75930.4	69713.5	79233	61226.6	75822.1	67640.7	68179.7	63215.2	71964.2	65342.1	63591.2	67211.7	77753.6	16.7571	16.0816	16.0911	16.2555	16.2124	16.0891	16.2738	15.9019	16.2103	16.0456	15.948	16.135	15.9957	15.9565	16.0364	16.2466	2	4	3	2	0	2	5
>ENSSSCP00000007671	9	0.90362	0.249486	0.94837	0.537683	CSNK2A1	Uncharacterized protein [Source:UniProtKB/TrEMBL;Acc:F2Z5I5]|17|ENSSSCG00000007203|ENSSSCT00000007882	474356	515736	406927	538369	436390	428637	458919	409984	456765	411204	418764	416188	449865	452044	462286	472624	424803	423818	463613	18.9763	18.6344	19.0382	18.7353	18.8079	18.6452	18.8011	18.6495	18.6758	18.6669	18.7861	18.8184	18.8503	18.6964	18.6931	18.8226	7	7	7	7	5	5	10
>ENSSSCP00000003024	6	1.03541	0.56252	1.04321	0.189242	CSNK2A2	Uncharacterized protein [Source:UniProtKB/TrEMBL;Acc:F1RFS8]|6|ENSSSCG00000002804|ENSSSCT00000003104	74503.2	76090.7	70621.8	76862.4	74438.1	77141	91133	84185.4	75794.9	71814.7	72261.4	67656.8	77722.7	84698.9	74204.4	76903.1	77833.1	72876.8	79820	16.2154	16.1078	16.23	16.1838	16.4757	16.3613	16.2098	16.132	16.1409	16.0459	16.3701	16.1792	16.2308	16.2481	16.1532	16.2845	3	4	4	6	1	2	7
>ENSSSCP00000024864	9	0.884682	0.260088	0.709317	0.0298263	CSRP1	cysteine and glycine-rich protein 1 [Source:HGNC Symbol;Acc:2469]|10|ENSSSCG00000020976|ENSSSCT00000026397	3.53797e+06	3.58878e+06	2915660	4.25348e+06	3393972	3.12998e+06	2.56411e+06	3.40065e+06	2.71763e+06	3704051	2879032	3514419	2.50955e+06	1.4917e+06	3387049	2.78344e+06	2.26639e+06	2.7482e+06	2.3805e+06	21.7751	21.4754	22.0202	21.6945	21.29	21.6974	21.3739	21.8207	21.4572	21.7449	20.5085	21.6916	21.4084	21.112	21.3901	21.1828	9	9	9	9	9	9	9
>ENSSSCP00000001018	9	0.88528	0.677936	0.896226	0.708476	CSRP2	cysteine and glycine-rich protein 2 [Source:HGNC Symbol;Acc:2470]|5|ENSSSCG00000000951|ENSSSCT00000001040	1.79165e+06	2.06114e+06	1636253	2.68982e+06	779386	1.58611e+06	658038	2.00495e+06	629156	2247423	1.83911e+06	2138001	1.60572e+06	593256	2177519	2.39624e+06	1770043	1.92714e+06	770144	20.975	20.642	21.3591	19.572	19.3278	20.9351	19.2631	21.0998	20.8106	21.0278	19.1783	21.0543	21.1923	20.7554	20.878	19.5548	7	8	9	7	6	7	7
>ENSSSCP00000020759	3	0.789488	0.037037	0.494623	0.000546099	CST3	Sus scrofa cystatin C (CST3), mRNA. [Source:RefSeq mRNA;Acc:NM_001044602]|17|ENSSSCG00000029889|ENSSSCT00000027339	574154	482694	573222	627733	612964	453287	389547	428525	378110	626542	396673	500328	283989	182342	357201	240637	353239	326349	244169	18.8808	19.1287	19.2598	19.2254	18.5714	18.709	18.5284	19.2571	18.5976	18.9325	17.4763	18.4464	17.8765	18.4303	18.3161	17.8975	2	3	3	3	2	1	2
>ENSSSCP00000021841	5	1.01688	0.986693	1.04625	0.917386	CSTB	Sus scrofa cystatin B (stefin B) (CSTB), mRNA. [Source:RefSeq mRNA;Acc:NM_001097496]|GL896515.1|ENSSSCG00000027357|ENSSSCT00000023178	214479	105472	191767	392863	167814	218099	142192	130019	99559.9	399311	209542	327969	224400	98171.2	303348	137161	213613	432068	162038	16.6865	17.549	18.5837	17.3565	17.1175	16.9884	16.6033	18.6072	17.6769	18.3232	16.583	18.2106	17.0655	17.7046	18.7209	17.306	3	4	5	3	2	1	4
>ENSSSCP00000007985	3	1.04691	0.542103	0.996202	0.906331	CSTF1	Sus scrofa cleavage stimulation factor, 3' pre-RNA, subunit 1, 50kDa (CSTF1), mRNA. [Source:RefSeq mRNA;Acc:NM_001110430]|17|ENSSSCG00000007494|ENSSSCT00000008203	60261.3	66904.5	51393.5	56994.6	65752.8	63088.3	61463.8	65169.8	66466.3	59155	54672.2	71602.6	60032.5	74086.6	73105.6	50539	48917.1	58537.6	55008.8	16.0298	15.6493	15.7985	16.0048	15.9074	15.9919	16.0203	15.8522	15.7385	16.1277	16.1769	16.1577	15.6251	15.5781	15.8371	15.7474	1	3	3	2	2	1	4
>ENSSSCP00000011449	7	1.08568	0.064469	1.12456	0.0209944	CTBP2	Uncharacterized protein [Source:UniProtKB/TrEMBL;Acc:F1SDN6]|14|ENSSSCG00000010739|ENSSSCT00000011751	173541	185500	172915	160159	175589	188410	193936	194900	194981	179725	190145	176775	195156	193911	211084	207531	188986	184884	184542	17.5011	17.3997	17.2891	17.4218	17.5652	17.5724	17.573	17.4554	17.5367	17.4316	17.565	17.6875	17.663	17.5279	17.4963	17.4936	7	7	4	7	4	4	7
>ENSSSCP00000006461	4	0.306977	5.69561e-06	0.220084	2.25302e-06	CTHRC1	Uncharacterized protein [Source:UniProtKB/TrEMBL;Acc:F1S1D2]|4|ENSSSCG00000006051|ENSSSCT00000006640	102696	104694	83112.5	111057	111923	31525.4	26585.1	40099.9	30882.7	32791.2	28990.7	29803.1	22601.9	20998.2	28830.5	20973.2	21941.2	21340.9	21527.3	16.6758	16.3428	16.7609	16.7721	14.6983	15.2913	14.9145	15.001	14.8233	14.8632	14.358	14.8153	14.3563	14.4214	14.3813	14.3939	6	7	7	8	4	4	3
>ENSSSCP00000015253	30	0.961377	0.258889	0.942364	0.133372	CTNNA1	catenin (cadherin-associated protein), alpha 1, 102kDa [Source:HGNC Symbol;Acc:2509]|2|ENSSSCG00000014339|ENSSSCT00000015666	3.58075e+06	3.84903e+06	3.59213e+06	3.42619e+06	3.45565e+06	3.44245e+06	3.54955e+06	3.33474e+06	3.6445e+06	3.43251e+06	3.35599e+06	3.33742e+06	3.37437e+06	3.68025e+06	3.52754e+06	3.22685e+06	3228208	3.3649e+06	3218497	21.8761	21.7764	21.7082	21.7205	21.7592	21.6691	21.7973	21.7108	21.6783	21.6703	21.8114	21.7502	21.6217	21.6223	21.6821	21.618	36	38	36	38	34	31	38
>ENSSSCP00000008813	2	1.13295	0.0761578	1.05926	0.389529	CTNNA2	catenin (cadherin-associated protein), alpha 2 [Source:HGNC Symbol;Acc:2510]|3|ENSSSCG00000008254|ENSSSCT00000009040	129589	122748	120790	146061	128758	146817	151755	145777	125865	162137	161380	133989	137268	154283	115227	132545	142324	149117	130114	16.9053	16.8821	17.1562	16.9743	17.2114	17.1534	16.9415	17.3069	17.3001	17.0318	17.2352	16.8141	17.0161	17.1188	17.1861	16.9894	2	2	2	2	1	1	2
>ENSSSCP00000012019	4	0.97878	0.759492	0.955421	0.492243	CTNNB1	Sus scrofa catenin (cadherin-associated protein), beta 1, 88kDa (CTNNB1), mRNA. [Source:RefSeq mRNA;Acc:NM_214367]|13|ENSSSCG00000011274|ENSSSCT00000012342	483208	433231	540374	448227	510997	472954	501223	499319	459285	399493	507671	470732	461667	437467	440767	489967	455618	476203	469980	18.7248	19.0436	18.7739	18.963	18.9351	18.9296	18.809	18.6078	18.9535	18.8445	18.7388	18.7497	18.9023	18.7975	18.8612	18.8422	27	30	28	28	25	25	30
>ENSSSCP00000007815	2	1.0784	0.325973	0.9887	0.870386	CTNNBL1	Uncharacterized protein [Source:UniProtKB/TrEMBL;Acc:F1SEK6]|17|ENSSSCG00000007337|ENSSSCT00000008029	15596.1	13749	15222.8	17568.3	15844.4	16818.9	18701.1	14111.3	19531.8	15910.3	16158	16500.9	15419.9	17389	16107.7	15862.4	15036.9	14202.3	13920.9	13.747	13.8939	14.1007	13.9517	14.1908	13.7846	14.2535	13.9577	13.98	14.0103	14.0859	13.9755	13.9533	13.8762	13.7938	13.765	1	1	1	1	1	1	2
>ENSSSCP00000014004	39	0.9938	0.933115	0.908443	0.122279	CTNND1	catenin (cadherin-associated protein), delta 1 [Source:HGNC Symbol;Acc:2515]|2|ENSSSCG00000013174|ENSSSCT00000014394	3.64989e+06	4.07052e+06	3.39771e+06	3.38064e+06	3750704	3.62726e+06	3.85377e+06	3.64174e+06	3.51162e+06	3.36463e+06	3.56514e+06	3.82668e+06	3.31572e+06	3.52816e+06	3.28758e+06	3.20249e+06	3.23832e+06	3.35163e+06	3.28615e+06	21.9568	21.6961	21.6889	21.8387	21.8778	21.7962	21.7437	21.682	21.7655	21.8677	21.7505	21.6486	21.6108	21.6268	21.6764	21.648	33	36	33	36	26	30	36
>ENSSSCP00000004295	14	1.01155	0.863417	0.86157	0.158545	CTPS1	CTP synthase 1 [Source:HGNC Symbol;Acc:2519]|6|ENSSSCG00000003973|ENSSSCT00000004395	270371	328712	237881	242633	272260	273494	318169	282378	265008	230494	272537	272381	232944	242742	267645	191090	210731	221692	263764	18.3265	17.8599	17.8884	18.0546	18.2794	18.1073	18.0157	17.8144	18.0561	18.0553	17.8891	18.03	17.5439	17.685	17.7582	18.0089	11	11	9	8	10	9	13
>ENSSSCP00000007918	6	1.29507	0.174408	1.26791	0.231732	CTSA	cathepsin A [Source:HGNC Symbol;Acc:9251]|17|ENSSSCG00000007431|ENSSSCT00000008134	95850.8	124278	67364.1	73653.6	118108	124134	119395	138937	110590	124973	94388.7	156518	121530	75093.6	136539	116808	116483	137236	147020	16.9232	16.0397	16.1685	16.8497	16.8654	17.0841	16.7549	16.9313	16.5263	17.256	16.1964	17.059	16.8338	16.8298	17.0663	17.1656	4	2	1	5	3	0	4
>ENSSSCP00000024395	8	1.07493	0.693074	0.85144	0.355754	CTSB	Sus scrofa cathepsin B (CTSB), mRNA. [Source:RefSeq mRNA;Acc:NM_001097458]|14|ENSSSCG00000023666|ENSSSCT00000026923	792028	686544	673795	1.10895e+06	698826	851374	583204	757073	770162	1.25237e+06	763527	981911	674364	330505	852999	601678	704492	967194	589319	19.389	19.362	20.0808	19.4146	19.1536	19.5301	19.5548	20.2562	19.5423	19.9052	18.3343	19.7022	19.1986	19.4262	19.8834	19.1687	7	7	7	7	5	5	7
>ENSSSCP00000015844	2	1.10138	0.955604	0.85847	0.287065	CTSC	cathepsin C [Source:HGNC Symbol;Acc:2528]|9|ENSSSCG00000014924|ENSSSCT00000016280	44138.2	36106.1	43855.2	56466.6	40125	48613.1	20180.2	33290.3	35300.7	98740.2	45500.4	58666.9	37891.4	43701.8	32662.2	40475.3	39951.1	47864.8	22692.9	15.14	15.4205	15.7851	15.2922	14.3007	15.0228	15.1074	16.5914	15.4736	15.8403	15.4154	14.9953	15.3048	15.2859	15.5467	14.47	0	0	1	0	0	0	0
>ENSSSCP00000023039	5	1.05529	0.425588	0.820916	0.0265726	CTSD	cathepsin D [Source:HGNC Symbol;Acc:2529]|GL896288.1|ENSSSCG00000026418|ENSSSCT00000032276	6608559	6179740	6181973	7670924	6401599	6.97392e+06	6351664	6.55928e+06	6.79369e+06	8227249	6825657	7086005	5.42507e+06	4439219	5986368	5394963	5552634	6.20965e+06	4.9676e+06	22.5591	22.5596	22.871	22.61	22.5987	22.6451	22.6958	22.972	22.7025	22.7565	22.0819	22.5132	22.3632	22.4047	22.5661	22.2441	5	5	5	5	5	5	5
>ENSSSCP00000013754	2	0.812298	0.140271	0.943979	0.600876	CTSF	Uncharacterized protein [Source:UniProtKB/TrEMBL;Acc:F1RU48]|2|ENSSSCG00000021340|ENSSSCT00000014140	43656.1	39061.5	48463.9	51656.4	35442.8	35461.8	29919.1	41621	37457.2	37601.1	22635.8	43536.6	41210.5	45982.9	41566.8	61094.5	34770.4	37478	26370.3	15.2535	15.5646	15.6567	15.1132	14.8688	15.345	15.193	15.1985	14.4663	15.4099	15.4888	15.3431	15.8988	15.0856	15.1938	14.6866	2	1	2	2	0	0	1
>ENSSSCP00000001934	2	0.963006	0.761969	0.664544	0.0126954	CTSH	Sus scrofa cathepsin H (CTSH), mRNA. [Source:RefSeq mRNA;Acc:NM_213929]|7|ENSSSCG00000001770|ENSSSCT00000001983	56915	44760.3	56838.8	70000.5	56060.5	54809.5	45554.3	53596.2	55625.7	71067.1	53145.7	49867.9	37822.5	26963.9	34354.7	32416.9	42260.8	48266.4	42672.5	15.4499	15.7946	16.0951	15.7747	15.4753	15.7098	15.7635	16.1169	15.6977	15.6058	14.7187	15.0682	14.9845	15.367	15.5587	15.381	2	2	3	2	1	2	2
>ENSSSCP00000011919	2	1.09927	0.59842	0.857971	0.62032	CTSL	Sus scrofa cathepsin L1 (CTSL1), mRNA. [Source:RefSeq mRNA;Acc:NM_213892]|10|ENSSSCG00000011171|ENSSSCT00000012233	55933.4	31673.5	61006.9	89353.8	41699.2	61485.6	41685.9	48836.5	55758.7	84689.6	62496.3	75446.7	47989.2	23305.5	56315.1	46365.9	57931.6	73739.9	30277.2	14.951	15.8967	16.4472	15.3477	15.3473	15.5757	15.7669	16.3699	15.9315	16.2032	14.5084	15.7812	15.5008	15.8221	16.1702	14.8859	1	2	3	2	1	0	2
>ENSSSCP00000007089	8	1.13877	0.420179	0.750834	0.0481687	CTSS	cathepsin S [Source:HGNC Symbol;Acc:2545]|4|ENSSSCG00000006648|ENSSSCT00000007284	579631	504567	515771	719541	578647	660067	551177	497695	544875	992415	643910	730330	435207	282813	501103	411287	541153	502842	372044	18.9447	18.9764	19.4567	19.1423	19.0722	18.9249	19.0556	19.9206	19.2965	19.4782	18.1095	18.9347	18.6498	19.0457	18.9397	18.5051	7	7	8	7	4	5	7
>ENSSSCP00000008030	7	1.1059	0.641696	1.00099	0.883315	CTSZ	Sus scrofa cathepsin Z (CTSZ), mRNA. [Source:RefSeq mRNA;Acc:NM_001123104]|17|ENSSSCG00000007522|ENSSSCT00000008249	470355	390421	427463	655347	408190	520165	365425	410143	414090	825651	506328	599353	470820	251316	616690	366587	557132	645588	387604	18.5747	18.7054	19.3219	18.6389	18.4792	18.6458	18.6596	19.6552	18.9497	19.193	17.9391	19.2342	18.4838	19.0877	19.3003	18.5642	3	6	7	4	4	4	4
>ENSSSCP00000007232	5	0.935425	0.604143	0.903664	0.418795	CTTNBP2NL	CTTNBP2 N-terminal like [Source:HGNC Symbol;Acc:25330]|4|ENSSSCG00000006781|ENSSSCT00000007427	71672.6	54418.6	78971.6	83331.5	69968.7	67044.3	53787.1	68132.6	68591.7	71177.5	71637.2	68939.9	64768	59438.3	64013.9	72965.1	67908.7	61508.7	62773.1	15.7318	16.269	16.3466	16.0944	15.715	16.0561	16.0657	16.1191	16.1284	16.0731	15.8591	15.9661	16.1549	16.0513	15.9085	15.9379	0	5	6	3	0	1	2
>ENSSSCP00000016387	12	1.82897	0.531612	0.995137	0.850673	CUL1	cullin 1 [Source:HGNC Symbol;Acc:2551]|9|ENSSSCG00000015455|ENSSSCT00000016837	165016	176169	152770	166156	164967	301809	134484	150124	156630	1.06943e+06	145436	154751	164213	156161	213620	156044	141455	148369	169630	17.4266	17.221	17.3422	17.3318	17.0371	17.1958	17.257	20.0284	17.15	17.2396	17.2527	17.7047	17.2516	17.11	17.1788	17.372	9	4	5	9	4	2	8
>ENSSSCP00000011841	5	1.06859	0.453132	1.15901	0.163683	CUL2	cullin 2 [Source:HGNC Symbol;Acc:2552]|10|ENSSSCG00000011104|ENSSSCT00000012151	46254.2	54453.2	44787.8	36990.8	48784.8	49426.5	52146.1	50914.9	52034.9	44984.4	52755.3	43723.6	53609.1	56237.7	54192.8	46402.9	52529.9	49248.9	63042.2	15.7327	15.4508	15.1749	15.5741	15.6703	15.6358	15.6672	15.4571	15.687	15.4161	15.7792	15.7258	15.5019	15.6809	15.5878	15.944	3	3	2	4	2	2	3
>ENSSSCP00000017198	8	0.945715	0.288339	1.16978	0.0225905	CUL3	Uncharacterized protein [Source:UniProtKB/TrEMBL;Acc:F1SR61]|15|ENSSSCG00000016234|ENSSSCT00000017677	90644.8	94741.9	86622.2	82607.2	98607.8	85724.1	89516.9	90588.2	81109.8	83880.7	87843	81406	106035	106059	107298	108440	107242	108940	98229.1	16.5317	16.4024	16.334	16.5894	16.4499	16.467	16.3076	16.3561	16.4226	16.3128	16.6945	16.7113	16.7265	16.7105	16.7332	16.5839	7	8	8	11	4	5	11
>ENSSSCP00000010203	3	1.30417	0.0523109	1.25305	0.0803719	CUL4A	cullin 4A [Source:HGNC Symbol;Acc:2554]|11|ENSSSCG00000009556|ENSSSCT00000010475	13522.3	12191	10976.6	16781.6	14139.9	17635.3	16982.7	18346.3	18251.5	15884.5	19272.3	17074.6	16944.1	16138	15855.8	17308.5	18897.6	13988.3	19476.3	13.5735	13.4221	14.0346	13.7875	14.0518	14.1632	14.1557	13.9553	14.2342	14.0596	13.9782	13.9527	14.0792	14.2059	13.7719	14.2494	6	7	6	7	5	3	8
>ENSSSCP00000013401	15	1.08637	0.195056	1.15074	0.0546458	CUL4B	Uncharacterized protein [Source:UniProtKB/TrEMBL;Acc:F1RUC1]|X|ENSSSCG00000012603|ENSSSCT00000013782	165394	188880	150783	157280	164632	179678	170952	189135	187943	159448	181095	189496	190325	187996	190675	183662	174036	187301	218281	17.5271	17.2021	17.263	17.3289	17.3832	17.5291	17.5199	17.2827	17.4664	17.5318	17.5203	17.5408	17.4867	17.409	17.515	17.7358	7	14	10	11	2	4	13
>ENSSSCP00000022904	9	0.937275	0.486537	1.10915	0.261542	CUL5	cullin 5 [Source:HGNC Symbol;Acc:2556]|9|ENSSSCG00000029198|ENSSSCT00000029949	139529	166229	134800	117187	139900	130777	136821	129369	137662	128925	124028	127858	154759	187435	140515	140441	159775	146517	153873	17.3428	17.0405	16.8385	17.094	17.0619	16.9811	17.0708	16.9762	16.9203	16.9642	17.516	17.1004	17.0996	17.2857	17.1607	17.2314	5	6	5	7	3	1	7
>ENSSSCP00000001641	3	0.934854	0.272339	0.912393	0.207295	CUTA	cutA divalent cation tolerance homolog (E. coli) [Source:HGNC Symbol;Acc:21101]|7|ENSSSCG00000001512|ENSSSCT00000001685	235302	211467	233109	250807	245824	219973	186167	213359	220199	264051	224523	211538	214688	159752	245490	223090	218065	217841	223887	17.6901	17.8306	17.9362	17.9073	17.5062	17.7029	17.7484	18.0105	17.7765	17.6906	17.2855	17.9053	17.7673	17.7344	17.7329	17.7724	2	3	3	3	1	2	3
>ENSSSCP00000017950	2	1.02814	0.676165	0.891804	0.144533	CWC27	CWC27 spliceosome-associated protein homolog (S. cerevisiae) [Source:HGNC Symbol;Acc:10664]|16|ENSSSCG00000016942|ENSSSCT00000018450	9668.5	9088.53	10012.9	10218.4	9354.12	9940.53	9400.29	9657.71	9651.48	10435.5	8538.21	11960.1	8622.41	6798.26	9722.71	8718.67	8378.86	10802.9	7313.08	13.1498	13.2896	13.3189	13.1914	13.1985	13.2375	13.2365	13.3492	13.0597	13.5459	12.7309	13.2471	13.0899	13.0325	13.3991	12.8363	1	2	2	1	0	0	0
>ENSSSCP00000005246	5	1.23373	0.0267748	1.37944	0.0059023	CYB5A	Sus scrofa cytochrome b5 type A (microsomal) (CYB5A), mRNA. [Source:RefSeq mRNA;Acc:NM_001001770]|1|ENSSSCG00000004875|ENSSSCT00000005381	1.11977e+06	1.03784e+06	1.28681e+06	1.16593e+06	988525	1.3815e+06	1441599	1.33374e+06	1.31465e+06	1.35457e+06	1.24874e+06	1.59568e+06	1.54467e+06	1.57747e+06	1.56516e+06	1.35378e+06	1.50255e+06	1.66733e+06	1.6017e+06	19.9851	20.2954	20.1531	19.9149	20.4592	20.347	20.3263	20.3694	20.252	20.6057	20.5892	20.5779	20.3686	20.519	20.6691	20.6112	4	5	4	4	4	4	5
>ENSSSCP00000002974	5	1.05833	0.429158	1.10913	0.186826	CYB5B	cytochrome b5 type B (outer mitochondrial membrane) [Source:HGNC Symbol;Acc:24374]|6|ENSSSCG00000002756|ENSSSCT00000003053	901722	802198	1.06653e+06	838652	899508	954318	1.0442e+06	997741	930282	838342	957868	957474	1.00012e+06	1.02046e+06	908479	968861	960916	1.09001e+06	1.05202e+06	19.6136	20.0245	19.6777	19.7788	19.994	19.9283	19.8273	19.6772	19.8695	19.8689	19.9608	19.7931	19.8859	19.8741	20.0559	20.0047	5	5	5	5	5	5	5
>ENSSSCP00000011654	6	0.990328	0.679095	1.07838	0.042908	CYB5R1	cytochrome b5 reductase 1 [Source:HGNC Symbol;Acc:13397]|10|ENSSSCG00000010929|ENSSSCT00000011961	164559	166725	167993	161224	162296	162968	177622	152763	166638	154580	167149	159054	177458	189263	162365	178806	170111	171063	193141	17.3471	17.358	17.2987	17.3083	17.4384	17.2209	17.3464	17.238	17.3508	17.2792	17.53	17.3089	17.448	17.3761	17.3842	17.5593	5	4	4	6	2	3	5
>ENSSSCP00000000040	16	0.994873	0.971183	1.07411	0.261701	CYB5R3	cytochrome b5 reductase 3 [Source:HGNC Symbol;Acc:2873]|5|ENSSSCG00000000038|ENSSSCT00000000040	1.74652e+06	1.96558e+06	1649456	1.5388e+06	1.83224e+06	1.73756e+06	1.76835e+06	1760418	1896079	1.5681e+06	1.73358e+06	1698862	1.87595e+06	1.9795e+06	1.83139e+06	1.91181e+06	1.83921e+06	1.80323e+06	1.89058e+06	20.9065	20.6536	20.5534	20.8052	20.754	20.7475	20.8546	20.5806	20.7253	20.6961	20.9167	20.8045	20.8665	20.8107	20.7822	20.8504	14	15	15	15	11	13	15
>ENSSSCP00000021755	2	1.04918	0.665274	1.12406	0.453668	CYC1	Uncharacterized protein [Source:UniProtKB/TrEMBL;Acc:I3LCI0]|4|ENSSSCG00000020682|ENSSSCT00000028031	47698.3	36469.3	60887.6	41170.3	52265.8	50043.9	59644.3	47607.6	56148.2	41234.5	51457.2	44171.6	53615.7	80464	50664.4	47821.4	45239.1	50877.6	46627.8	15.1544	15.8939	15.3293	15.6736	15.8641	15.5389	15.777	15.3316	15.6511	15.4308	16.2961	15.6287	15.5454	15.4653	15.6347	15.5089	5	4	5	4	2	2	7
>ENSSSCP00000018067	12	1.12287	0.169594	1.13028	0.143455	CYFIP2	cytoplasmic FMR1 interacting protein 2 [Source:HGNC Symbol;Acc:13760]|16|ENSSSCG00000017054|ENSSSCT00000018567	306871	350105	292165	259465	325748	344575	377921	337836	368007	304161	354124	325403	346851	359122	327449	343695	372556	336812	341471	18.4174	18.1564	17.9852	18.3134	18.5277	18.366	18.4894	18.2145	18.4339	18.3119	18.4541	18.3209	18.3908	18.5071	18.3616	18.3814	9	12	9	12	8	9	13
>ENSSSCP00000021526	3	0.717645	0.0101597	0.701351	0.00882053	CYP1B1	Uncharacterized protein [Source:UniProtKB/TrEMBL;Acc:I3LBV4]|GL893411.2|ENSSSCG00000030456|ENSSSCT00000025308	52182.9	60143.4	46396	45308.4	56884	37448.8	38213.5	41112.4	41071.9	27744.3	34952.2	41598.8	36598.6	42735.4	34878.3	33982.9	34626.4	38464.6	34903.9	15.8761	15.5017	15.4675	15.7957	15.2218	15.3273	15.3259	14.7599	15.0931	15.3443	15.3831	15.09	15.0525	15.0796	15.2312	15.0911	3	4	4	4	4	4	5
>ENSSSCP00000025054	4	0.890323	0.198404	1.0027	0.981435	CYP20A1	cytochrome P450, family 20, subfamily A, polypeptide 1 [Source:HGNC Symbol;Acc:20576]|GL896348.1|ENSSSCG00000022432|ENSSSCT00000024501	134775	152634	126162	114202	146103	119993	117432	119294	139379	118066	114271	111519	135139	149141	151200	127094	151517	119556	112327	17.2197	16.9449	16.8012	17.1566	16.8415	16.8642	17.0887	16.8492	16.8021	16.7669	17.1863	17.2061	16.9555	17.2091	16.8673	16.7774	3	3	2	3	2	2	4
>ENSSSCP00000016238	5	0.852511	0.0280969	0.865914	0.0423294	CYP51A1	Sus scrofa cytochrome P450, family 51, subfamily A, polypeptide 1 (CYP51), mRNA. [Source:RefSeq mRNA;Acc:NM_214432]|9|ENSSSCG00000015311|ENSSSCT00000016684	147694	154749	137560	135628	162840	125911	128818	140876	119078	111178	127770	127747	127891	123860	121324	137697	130884	127456	126123	17.2396	17.0697	17.0493	17.3131	16.975	17.1041	16.8615	16.7625	16.9632	16.9629	16.9183	16.8885	17.0711	16.9979	16.9596	16.9445	5	9	8	6	4	6	9
>ENSSSCP00000007401	6	0.765929	0.243151	0.695819	0.117729	CYR61	Uncharacterized protein [Source:UniProtKB/TrEMBL;Acc:F1SEX1]|4|ENSSSCG00000006940|ENSSSCT00000007604	76212.3	98405.8	48206.3	68326.4	89910.8	58373.3	62846.9	57164.6	60419.3	64211.1	54419.1	51178.5	53030	56535	85196.5	41202.2	36702.3	51644.3	46899.5	16.5865	15.5569	16.0602	16.4562	15.9396	15.8028	15.8827	15.9705	15.7318	15.6433	15.7869	16.3785	15.3304	15.1636	15.6563	15.5173	6	3	3	5	9	2	2
>ENSSSCP00000002240	3	0.868564	0.160879	0.779199	0.0335546	DAD1	Sus scrofa defender against cell death 1 (DAD1), mRNA. [Source:RefSeq mRNA;Acc:NM_213944]|7|ENSSSCG00000002050|ENSSSCT00000002293	401372	462197	345100	358548	439641	348617	331495	355124	379830	324195	353570	347488	312748	330684	347532	314331	272394	286840	324709	18.8181	18.3967	18.4518	18.746	18.3386	18.438	18.535	18.3065	18.4316	18.4066	18.3351	18.4068	18.2619	18.0553	18.1299	18.3088	3	3	3	3	3	3	3
>ENSSSCP00000021948	9	1.08453	0.324415	1.25228	0.00347772	DAG1	dystroglycan 1 (dystrophin-associated glycoprotein 1) [Source:HGNC Symbol;Acc:2666]|JH118489.1|ENSSSCG00000030708|ENSSSCT00000026336	129861	119287	135694	139694	124770	140838	137643	147032	145206	147212	162612	105326	162622	162218	136516	170025	175805	175985	155183	16.8641	17.05	17.0919	16.9289	17.0706	17.1658	17.1477	17.1675	17.3111	16.6845	17.3076	17.0587	17.3754	17.4236	17.4251	17.2436	4	6	5	7	2	4	7
>ENSSSCP00000016631	28	0.958588	0.2829	1.00576	0.833024	DARS	aspartyl-tRNA synthetase [Source:HGNC Symbol;Acc:2678]|15|ENSSSCG00000015689|ENSSSCT00000017089	2.78812e+06	2.96852e+06	2.77138e+06	2.57541e+06	2837183	2.67266e+06	2.74018e+06	2637024	2.82306e+06	2.47001e+06	2.64345e+06	2722243	2804182	2.85066e+06	2.85299e+06	2.80105e+06	2730870	2775018	2.8145e+06	21.5013	21.4022	21.2964	21.436	21.3858	21.3305	21.4288	21.2361	21.334	21.3764	21.4429	21.444	21.4175	21.3809	21.4041	21.4244	26	25	26	27	23	23	27
>ENSSSCP00000021287	5	0.88826	0.237504	0.735889	0.0547429	DAZAP1	DAZ associated protein 1 [Source:HGNC Symbol;Acc:2683]|2|ENSSSCG00000022528|ENSSSCT00000023438	135230	134908	124536	156779	124697	120119	88733.9	120298	99905.7	160746	110103	140930	99514.2	51117.9	132142	89839.7	106213	117050	100723	17.0416	16.9262	17.2584	16.9281	16.4372	16.8762	16.6083	17.2944	16.7485	17.1046	15.6415	17.0117	16.4551	16.6966	16.8368	16.62	4	5	5	5	3	3	2
>ENSSSCP00000021888	7	1.23412	0.671083	1.14459	0.955884	DBI	Sus scrofa diazepam binding inhibitor (GABA receptor modulator, acyl-CoA binding protein) (DBI), mRNA. [Source:RefSeq mRNA;Acc:NM_214119]|15|ENSSSCG00000023435|ENSSSCT00000024406	2.50512e+06	1.00255e+06	1.80841e+06	5.57953e+06	1630008	3.09163e+06	1.11301e+06	1.82252e+06	1.41639e+06	6.84689e+06	2.36965e+06	4981287	2.86733e+06	503372	4806001	1.76601e+06	2.54185e+06	6439213	1.14756e+06	19.9352	20.7863	22.4117	20.6364	20.086	20.7975	20.4338	22.707	21.1762	22.2481	18.9413	22.1964	20.7521	21.2774	22.6185	20.1301	4	4	6	4	3	3	4
>ENSSSCP00000025136	5	1.01249	0.867696	0.94027	0.565791	DBN1	drebrin 1 [Source:HGNC Symbol;Acc:2695]|GL896061.1|ENSSSCG00000027580|ENSSSCT00000027518	1.03471e+06	856857	1.25626e+06	1.01121e+06	1.01451e+06	1.04763e+06	1.05255e+06	1.09929e+06	997368	972909	901773	1.26189e+06	972908	1.00633e+06	935966	652217	916265	1.24165e+06	1.08502e+06	19.7087	20.2607	19.9477	19.9524	20.0055	20.0681	19.9278	19.8919	19.7824	20.2672	19.9407	19.8361	19.315	19.8054	20.2438	20.0493	5	5	5	5	3	4	5
>ENSSSCP00000017711	17	0.959342	0.276379	0.89037	0.049314	DBNL	drebrin-like [Source:HGNC Symbol;Acc:2696]|18|ENSSSCG00000016721|ENSSSCT00000018202	1.7724e+06	1.66203e+06	1837832	1738373	1.85137e+06	1.70034e+06	1.56385e+06	1.67998e+06	1.63031e+06	1.87929e+06	1.70962e+06	1.73898e+06	1.57809e+06	1293225	1.72448e+06	1.52051e+06	1.60528e+06	1.74593e+06	1.57913e+06	20.6645	20.8096	20.7293	20.8202	20.5767	20.68	20.6367	20.8418	20.7052	20.7298	20.3025	20.7177	20.5361	20.6144	20.7356	20.5907	17	17	17	17	9	16	17
>ENSSSCP00000018324	2	0.876506	0.20253	1.04714	0.708796	DCAF7	DDB1 and CUL4 associated factor 7 [Source:HGNC Symbol;Acc:30915]|12|ENSSSCG00000017294|ENSSSCT00000018826	33318.7	35955.6	35053.7	29560.6	32704.9	29204	35638.9	23942	33718.8	29379.7	19229.5	33315.2	34889.2	41742.4	39059.9	41112.5	30395.8	29907.3	27117.2	15.1339	15.0973	14.8514	14.9972	15.1212	14.5473	15.0413	14.8425	14.231	15.0239	15.3492	15.2534	15.3273	14.8916	14.8682	14.7269	0	0	1	0	0	0	0
>ENSSSCP00000006811	6	0.94328	0.340941	1.04204	0.587614	DCAF8	Sus scrofa DDB1 and CUL4 associated factor 8 (DCAF8), mRNA. [Source:RefSeq mRNA;Acc:NM_001244434]|4|ENSSSCG00000006388|ENSSSCT00000007001	93847.9	95698.9	100853	84913.4	93926.1	88524.9	100462	88818.2	102744	83069.6	80840.9	75214.8	97793.3	94548.3	81878.8	117911	96602.1	89217.2	106602	16.5462	16.6219	16.3737	16.5192	16.6163	16.4386	16.6487	16.342	16.3028	16.1987	16.5288	16.3212	16.8473	16.5598	16.445	16.7019	4	6	3	3	1	1	6
>ENSSSCP00000018372	3	1.14459	0.272646	1.17022	0.128679	DCAKD	dephospho-CoA kinase domain containing [Source:HGNC Symbol;Acc:26238]|12|ENSSSCG00000017340|ENSSSCT00000018876	17083.3	16956.6	14337.2	16712.4	20327.1	19553.4	16945.7	25972.1	21423.6	18819.7	19500.2	14659.3	19991.3	19095.1	18159.6	20671.1	17195.1	19626.7	25200	14.0496	13.8075	14.0286	14.3111	14.0486	14.6647	14.3869	14.2	14.2512	13.8395	14.2209	14.1484	14.3353	14.0697	14.2605	14.6211	1	1	1	1	0	0	1
>ENSSSCP00000012761	8	0.936427	0.278433	0.89458	0.156018	DCBLD2	discoidin, CUB and LCCL domain containing 2 [Source:HGNC Symbol;Acc:24627]|13|ENSSSCG00000011977|ENSSSCT00000013106	286076	289134	266500	265281	323390	267890	269717	296807	266277	259417	252470	262649	255918	296495	268860	207382	220037	259680	283054	18.1414	18.0238	18.0172	18.3029	18.0411	18.1792	18.0226	17.9849	17.9458	18.0028	18.1776	18.0365	17.6619	17.7474	17.9864	18.1107	7	7	7	8	7	6	7
>ENSSSCP00000024373	2	1.18531	0.0146242	1.17391	0.0208696	DCDC2C	Uncharacterized protein [Source:UniProtKB/TrEMBL;Acc:I3LJW1]|11|ENSSSCG00000030111|ENSSSCT00000024366	462937	463737	461908	505588	420516	548723	520026	538507	556601	549856	568275	559071	543447	591501	500050	584142	591280	473093	520618	18.8229	18.8172	18.9476	18.6818	18.9882	19.0386	19.0863	19.0687	19.1162	19.0927	19.174	18.9317	19.156	19.1735	18.8518	18.9899	2	2	1	1	1	2	2
>ENSSSCP00000019227	6	1.13906	0.0423397	1.23181	0.0063859	DCLK1	Uncharacterized protein [Source:UniProtKB/TrEMBL;Acc:I3L5C8]|11|ENSSSCG00000029956|ENSSSCT00000028625	1.18331e+06	1.26548e+06	1.06731e+06	1.22752e+06	1.17293e+06	1.34786e+06	1.38702e+06	1.23372e+06	1.48873e+06	1.40732e+06	1.40151e+06	1.16886e+06	1.45761e+06	1.67141e+06	1.45758e+06	1.57557e+06	1.44681e+06	1.27565e+06	1.31863e+06	20.2713	20.0255	20.2273	20.1617	20.4036	20.2346	20.5056	20.4245	20.4185	20.1567	20.6726	20.4751	20.5874	20.4644	20.2828	20.3306	6	6	6	6	6	6	6
>ENSSSCP00000016152	7	1.21721	0.0153625	1.12033	0.0864067	DCPS	Sus scrofa decapping enzyme, scavenger (DCPS), mRNA. [Source:RefSeq mRNA;Acc:NM_213790]|9|ENSSSCG00000015231|ENSSSCT00000016597	108074	104209	95708.2	118187	114193	131549	140336	124392	120789	143171	127685	132923	121078	125512	119965	120961	128036	117836	114160	16.6691	16.5464	16.8507	16.8011	17.0985	16.9245	16.8821	17.1274	16.9622	17.0202	16.9375	16.8723	16.8842	16.9662	16.8464	16.8007	6	8	7	6	3	5	8
>ENSSSCP00000008833	44	0.986857	0.790149	1.05992	0.238282	DCTN1	dynactin 1 [Source:HGNC Symbol;Acc:2711]|3|ENSSSCG00000008274|ENSSSCT00000009061	1.63175e+06	1.76299e+06	1.56958e+06	1.4926e+06	1.70184e+06	1.61031e+06	1.61888e+06	1.62296e+06	1.7299e+06	1.4727e+06	1.65678e+06	1.56061e+06	1.72953e+06	1.78313e+06	1.762e+06	1673594	1.69375e+06	1.5922e+06	1.8725e+06	20.7496	20.582	20.5094	20.6987	20.6266	20.6302	20.7223	20.49	20.66	20.5737	20.766	20.7488	20.6745	20.6918	20.6026	20.8365	34	37	36	37	26	29	44
>ENSSSCP00000011701	7	1.07613	0.135379	1.14465	0.00880688	DCTN3	dynactin 3 (p22) [Source:HGNC Symbol;Acc:2713]|10|ENSSSCG00000010972|ENSSSCT00000012009	215643	215521	230039	216955	200058	232059	246575	235431	197907	235718	243205	233519	246836	229357	260761	255012	252308	243400	240177	17.7175	17.8115	17.727	17.6101	17.9117	17.8449	17.5945	17.8467	17.8918	17.8332	17.8072	17.9924	17.9602	17.9448	17.893	17.8737	7	7	6	5	6	6	8
>ENSSSCP00000024337	14	0.939688	0.262394	0.947183	0.321497	DCTN4	dynactin 4 (p62) [Source:HGNC Symbol;Acc:15518]|GL894772.1|ENSSSCG00000021427|ENSSSCT00000024781	388632	407112	370320	414678	362419	365193	333054	390953	358387	320120	364326	424317	368106	423577	401425	365354	358063	320492	339724	18.6351	18.4984	18.6616	18.4673	18.3454	18.5766	18.4512	18.2883	18.4749	18.6948	18.6923	18.6148	18.4789	18.4499	18.2899	18.374	8	9	10	11	7	7	11
>ENSSSCP00000011506	2	1.00049	0.978015	1.04459	0.648563	DCTN5	dynactin 5 (p25) [Source:HGNC Symbol;Acc:24594]|10|ENSSSCG00000010793|ENSSSCT00000011809	39878.7	32932.4	41212.7	48809.8	36559.7	39898.2	33493.3	36705.2	36435.4	48321	39074.3	45360	41656.7	35438.3	46497.2	42496.9	47995.4	41540.7	35971.4	15.0072	15.3308	15.5749	15.158	15.0316	15.1637	15.1531	15.5604	15.2539	15.4691	15.113	15.5049	15.3751	15.5506	15.3422	15.1346	2	2	2	1	1	1	2
>ENSSSCP00000027194	2	1.07917	0.468487	1.01466	0.953059	DCTN6	Sus scrofa dynactin 6 (DCTN6), mRNA. [Source:RefSeq mRNA;Acc:NM_001167644]|GL895482.2|ENSSSCG00000023217|ENSSSCT00000025279	78696.8	73423.6	70145.2	95150	76068.4	84926.9	62544.6	78352	87842.5	99174.3	92447.2	89201.1	79850.2	55829.4	99719.8	83186.7	88133.4	76681.5	75550.7	16.164	16.0981	16.5379	16.215	15.9326	16.2577	16.4226	16.5977	16.4963	16.4448	15.7687	16.6056	16.3441	16.4274	16.2266	16.2052	1	2	2	2	1	1	3
>ENSSSCP00000019975	3	0.901091	0.474913	0.930746	0.635406	DCUN1D1	DCN1, defective in cullin neddylation 1, domain containing 1 [Source:HGNC Symbol;Acc:18184]|13|ENSSSCG00000022783|ENSSSCT00000025068	126917	166667	115108	100102	125791	114364	100844	112852	109436	142712	107498	112840	118127	132454	141308	115657	107478	102303	109565	17.3466	16.8126	16.6111	16.9407	16.6218	16.7841	16.7397	17.1227	16.714	16.7839	17.0151	17.1085	16.8195	16.7137	16.6425	16.7414	3	4	4	4	1	1	4
>ENSSSCP00000007402	11	0.915415	0.169774	0.961107	0.560948	DDAH1	dimethylarginine dimethylaminohydrolase 1 [Source:HGNC Symbol;Acc:2715]|4|ENSSSCG00000006941|ENSSSCT00000007605	6.19428e+06	6.13689e+06	5921593	7015820	5702820	5.67034e+06	4940638	5.73889e+06	5.70279e+06	6.31549e+06	5.36894e+06	5.95528e+06	5.95337e+06	4575218	6.91572e+06	6161048	5754456	6.50736e+06	5.80639e+06	22.5491	22.4976	22.7422	22.4432	22.2363	22.4523	22.4432	22.5905	22.3562	22.5057	22.1254	22.7214	22.5547	22.4562	22.6336	22.4692	11	11	11	11	10	10	11
>ENSSSCP00000013928	46	1.007	0.904039	0.990948	0.839661	DDB1	damage-specific DNA binding protein 1, 127kDa [Source:HGNC Symbol;Acc:2717]|2|ENSSSCG00000013094|ENSSSCT00000014314	2.71433e+06	2.98837e+06	2.57062e+06	2688748	2.60959e+06	2.73334e+06	2.55842e+06	2.62679e+06	2.73983e+06	3.11769e+06	2.85778e+06	2499535	2.68976e+06	2570268	2.72057e+06	2.969e+06	2663759	2.48991e+06	2.72505e+06	21.5109	21.2937	21.3585	21.3154	21.2868	21.3249	21.3857	21.572	21.4465	21.2532	21.2935	21.3755	21.5015	21.345	21.2477	21.3779	39	42	41	40	33	34	43
>ENSSSCP00000003805	18	0.903798	0.0903003	0.773514	0.00512501	DDOST	dolichyl-diphosphooligosaccharide--protein glycosyltransferase subunit (non-catalytic) [Source:HGNC Symbol;Acc:2728]|6|ENSSSCG00000003505|ENSSSCT00000003894	1.98417e+06	2.19649e+06	1.8325e+06	1.87448e+06	2.03323e+06	1.79329e+06	1.74482e+06	1.92139e+06	1.91373e+06	1.66452e+06	1.80676e+06	1.70854e+06	1.53479e+06	1.58249e+06	1.59519e+06	1.55411e+06	1.54314e+06	1.47397e+06	1.45983e+06	21.0668	20.8054	20.8381	20.9553	20.7346	20.8737	20.868	20.6667	20.785	20.7043	20.5938	20.6053	20.5677	20.5574	20.4913	20.4774	17	18	18	18	15	16	18
>ENSSSCP00000007622	6	1.02423	0.591191	1.00271	0.986594	DDRGK1	DDRGK domain containing 1 [Source:HGNC Symbol;Acc:16110]|17|ENSSSCG00000007160|ENSSSCT00000007833	157602	151868	148649	170585	159308	161420	149121	172278	154723	150717	173482	168202	158030	176951	147062	174214	143379	155461	151113	17.2125	17.1816	17.3801	17.2815	17.1861	17.3944	17.2393	17.2015	17.4044	17.3598	17.433	17.1661	17.4105	17.1295	17.2462	17.2053	5	5	5	5	3	3	6
>ENSSSCP00000010736	6	1.16827	0.447077	1.13835	0.461989	DDT	D-dopachrome tautomerase [Source:HGNC Symbol;Acc:2732]|14|ENSSSCG00000010063|ENSSSCT00000011024	228670	188308	238330	247191	240851	267148	280432	169133	318525	392303	181933	260565	260306	353696	258872	161342	267097	314502	206328	17.5227	17.8626	17.9153	17.8778	18.0973	17.3678	18.281	18.5816	17.473	17.9913	18.4322	17.9819	17.2998	18.027	18.2627	17.6546	4	5	6	4	2	3	5
>ENSSSCP00000023234	4	0.943827	0.20697	0.941886	0.187672	DDX1	Uncharacterized protein [Source:UniProtKB/TrEMBL;Acc:I3LGP0]|3|ENSSSCG00000022836|ENSSSCT00000026319	398029	436962	379381	378894	396877	375670	373708	389646	408475	369368	362798	350026	374897	391525	366341	402543	353115	366085	369776	18.7371	18.5333	18.5314	18.5983	18.5115	18.5718	18.6399	18.4947	18.4688	18.4171	18.5787	18.4828	18.6188	18.4298	18.4818	18.4963	3	4	4	3	3	3	4
>ENSSSCP00000000108	30	0.93036	0.00245867	0.887659	0.0017612	DDX17	DEAD (Asp-Glu-Ala-Asp) box helicase 17 [Source:HGNC Symbol;Acc:2740]|5|ENSSSCG00000000104|ENSSSCT00000000110	4.01151e+06	4079648	3.95596e+06	4031807	3.97863e+06	3.73215e+06	3.73836e+06	3731625	3.96663e+06	3.56448e+06	3.69452e+06	3.69729e+06	3.56086e+06	3.44023e+06	3.70067e+06	3843029	3.43099e+06	3.34922e+06	3.60099e+06	21.96	21.9156	21.943	21.9238	21.834	21.8314	21.9195	21.7653	21.817	21.818	21.7141	21.8194	21.8738	21.7102	21.6754	21.78	25	29	26	26	26	24	28
>ENSSSCP00000010925	18	0.796593	0.00329208	1.26213	0.646544	DDX21	DEAD (Asp-Glu-Ala-Asp) box helicase 21 [Source:HGNC Symbol;Acc:2744]|14|ENSSSCG00000010247|ENSSSCT00000011217	560415	587112	541918	509132	603500	446423	452937	497879	418966	387255	447367	474132	707315	2.5463e+06	344724	345148	292496	350289	364929	19.1633	19.0477	18.9577	19.203	18.789	18.9254	18.6765	18.5629	18.7711	18.8549	21.28	18.3951	18.3969	18.1581	18.4182	18.4773	15	18	18	17	15	12	20
>ENSSSCP00000025706	5	1.05665	0.510468	1.04782	0.589907	DDX23	DEAD (Asp-Glu-Ala-Asp) box polypeptide 23 [Source:HGNC Symbol;Acc:17347]|GL895364.2|ENSSSCG00000027789|ENSSSCT00000027880	75401.6	73329.5	60325.5	89523.1	78428.1	79673	85886.6	71933.1	81104.5	81194.6	83440.5	74478.7	79007.4	76251.3	71128.3	91776.2	84586.5	76735.4	73566.7	16.1621	15.8805	16.45	16.2591	16.3901	16.1344	16.3075	16.3091	16.3485	16.1845	16.2185	16.1181	16.4858	16.3681	16.2276	16.1668	2	3	2	4	0	1	4
>ENSSSCP00000002673	4	0.953239	0.831121	0.72951	0.133454	DDX24	Uncharacterized protein [Source:UniProtKB/TrEMBL;Acc:F1SCG7]|7|ENSSSCG00000002470|ENSSSCT00000002742	23366.3	17354	24817.5	18746.8	32547.1	22273.7	25699.5	25515.9	15149.5	18853.8	20285.7	28137.8	17046	14001.5	13247.8	16850	11134.9	17095.5	29946.2	14.083	14.5991	14.1944	14.9902	14.6495	14.6391	13.887	14.2026	14.3082	14.7802	13.7733	13.6935	14.0405	13.4428	14.0613	14.8701	2	5	1	2	0	1	4
>ENSSSCP00000014647	5	0.892221	0.273556	0.830293	0.101846	DDX39A	DEAD (Asp-Glu-Ala-Asp) box polypeptide 39A [Source:HGNC Symbol;Acc:17821]|2|ENSSSCG00000013776|ENSSSCT00000015052	68624.7	57987.1	72945.8	72154	71411.9	61228.4	50447.7	59526.8	65618.4	57288.3	43860.4	90628.6	56978.6	55784.7	35928.8	66575.2	66506.2	58879.5	58197.2	15.8234	16.1545	16.1388	16.1239	15.6225	15.8613	16.0018	15.806	15.4206	16.4677	15.7676	15.1329	16.0227	16.0212	15.8455	15.8287	3	5	2	2	2	1	3
>ENSSSCP00000001487	7	0.962835	0.254795	0.91617	0.00808562	DDX39B	Sus scrofa DEAD (Asp-Glu-Ala-Asp) box polypeptide 39B (DDX39B), mRNA. [Source:RefSeq mRNA;Acc:NM_001005157]|7|ENSSSCG00000001400|ENSSSCT00000001529	687410	710333	686168	695570	657569	661863	673820	676934	664892	583998	715281	656250	629784	647635	646569	672180	603062	603435	605824	19.4381	19.3882	19.4078	19.3268	19.362	19.3687	19.3428	19.1556	19.4482	19.3239	19.3048	19.3024	19.3585	19.2019	19.2028	19.2085	19	17	17	17	18	18	17
>ENSSSCP00000022235	2	1.06402	0.328365	0.980197	0.741481	DDX3X	Uncharacterized protein [Source:UniProtKB/TrEMBL;Acc:I3LDV0]|Y|ENSSSCG00000026430|ENSSSCT00000028884	25285.3	25376.3	27949	22447.2	25368.7	26904.1	30165.7	26048.1	28242.2	23149.6	27935.2	25883.4	24784.6	25359.4	26678.7	19487.2	25348.9	23837.1	27996.2	14.6312	14.7705	14.4542	14.6308	14.8806	14.6689	14.7856	14.4987	14.7698	14.6597	14.6302	14.7034	14.2502	14.6296	14.5409	14.7729	2	2	2	2	0	0	3
>ENSSSCP00000018319	9	1.01286	0.86489	0.812148	0.133049	DDX42	DEAD (Asp-Glu-Ala-Asp) box helicase 42 [Source:HGNC Symbol;Acc:18676]|12|ENSSSCG00000017289|ENSSSCT00000018821	225498	281642	178520	205612	236217	228397	233738	195638	228350	195552	274140	242964	183138	172502	145486	215777	180311	183075	201676	18.1035	17.4457	17.6496	17.8498	17.8345	17.5778	17.8009	17.5772	18.0646	17.8904	17.3963	17.1505	17.7192	17.4601	17.4821	17.6217	6	9	6	7	1	3	11
>ENSSSCP00000026552	13	0.932664	0.355414	1.06933	0.294095	DDX46	DEAD (Asp-Glu-Ala-Asp) box polypeptide 46 [Source:HGNC Symbol;Acc:18681]|2|ENSSSCG00000026644|ENSSSCT00000027801	253191	267631	219169	274238	251726	236142	267571	276918	232160	201211	200288	238705	270744	241060	292544	265667	256644	286483	282065	18.0299	17.7417	18.0651	17.9415	18.0296	18.0791	17.8248	17.6183	17.6117	17.8649	17.879	18.1583	18.0193	17.9694	18.1281	18.1057	7	8	10	9	3	3	13
>ENSSSCP00000023307	4	0.927605	0.502854	0.729767	0.0593925	DDX58	Sus scrofa DEAD (Asp-Glu-Ala-Asp) box polypeptide 58 (DDX58), mRNA. [Source:RefSeq mRNA;Acc:NM_213804]|10|ENSSSCG00000030408|ENSSSCT00000026775	79342.1	76328.9	62187.6	91798.6	87053.2	73598.1	122473	78501.9	37981	50384.4	86365.2	65883	57901.2	35463.2	57333.5	40704.5	62046.7	73442.3	78417	16.2199	15.9243	16.4862	16.4096	16.9021	16.2604	15.213	15.6207	16.3982	16.0076	15.114	15.8071	15.3129	15.9211	16.1643	16.2589	2	4	3	3	1	3	14
>ENSSSCP00000016020	15	0.985643	0.616066	0.960063	0.132912	DDX6	DEAD (Asp-Glu-Ala-Asp) box helicase 6; Uncharacterized protein [Source:UniProtKB/TrEMBL;Acc:F1SAJ5]|9|ENSSSCG00000015097|ENSSSCT00000016463	729570	724553	714180	716499	763047	719096	710886	733466	776895	687053	753768	652506	700433	711986	696174	747484	706927	646164	693865	19.4667	19.4459	19.4506	19.5414	19.4393	19.4844	19.5674	19.3901	19.5238	19.3156	19.4415	19.4091	19.5117	19.4312	19.3015	19.4043	12	13	12	13	10	11	13
>ENSSSCP00000006535	10	1.03323	0.627269	1.09636	0.0470656	DECR1	Sus scrofa 2,4-dienoyl CoA reductase 1, mitochondrial (DECR1), nuclear gene encoding mitochondrial protein, mRNA. [Source:RefSeq mRNA;Acc:NM_001190232]|4|ENSSSCG00000006126|ENSSSCT00000006718	425299	433980	429421	406175	431620	439430	474260	361074	489950	444258	475501	391535	466282	506196	450604	507169	483550	432196	417977	18.7273	18.712	18.6317	18.7194	18.8553	18.4619	18.9023	18.761	18.8591	18.5788	18.9493	18.7815	18.9521	18.8833	18.7213	18.6731	7	8	8	6	6	6	9
>ENSSSCP00000024516	2	0.767106	0.0656402	0.802226	0.107971	DEGS1	delta(4)-desaturase, sphingolipid 1 [Source:HGNC Symbol;Acc:13709]|10|ENSSSCG00000024484|ENSSSCT00000025010	34674.7	30440.7	43593.3	28539	36125.8	26599.2	29215.7	27971	29848.2	22305.9	26097.6	24156.7	27817	25335.6	25538.5	30355.8	25098.2	33301.4	27272.2	14.8937	15.4118	14.8006	15.1407	14.8345	14.7716	14.8654	14.4451	14.6716	14.5601	14.6289	14.6404	14.8897	14.6153	15.0233	14.7351	2	3	2	2	1	1	2
>ENSSSCP00000001145	7	0.82556	0.581502	0.895671	0.842352	DEK	DEK oncogene [Source:HGNC Symbol;Acc:2768]|7|ENSSSCG00000001075|ENSSSCT00000001170	288970	343342	430484	177130	204924	238562	265208	239688	252975	194119	249355	230028	258822	276662	255807	268885	245028	245695	260856	18.3893	18.7156	17.4344	17.6447	18.0168	17.8708	17.9486	17.5666	17.9278	17.8115	18.0778	17.9647	18.0366	17.9026	17.9065	17.9929	5	5	5	5	4	5	8
>ENSSSCP00000010450	5	0.953291	0.208533	0.899206	0.020725	DENR	density-regulated protein [Source:HGNC Symbol;Acc:2769]|14|ENSSSCG00000009788|ENSSSCT00000010730	210823	197218	223925	215703	206446	200976	200504	217088	194194	193691	192223	208154	189573	177091	191266	185244	194949	195151	193738	17.5894	17.7727	17.7187	17.6554	17.6133	17.7279	17.5671	17.5634	17.5524	17.6673	17.4341	17.5452	17.4991	17.5727	17.5742	17.5637	5	5	4	5	4	4	5
>ENSSSCP00000000629	5	1.02762	0.631663	1.07935	0.196195	DERA	deoxyribose-phosphate aldolase (putative) [Source:HGNC Symbol;Acc:24269]|5|ENSSSCG00000000599|ENSSSCT00000000644	57104.8	62300.9	53843.3	51867.5	60407.5	58682	58016.2	56165.4	64439.8	51843.2	62966.8	58660.9	61635.9	61223.1	64625.1	64861.2	57804.8	65756.1	55545.4	15.927	15.7165	15.6625	15.8824	15.8242	15.7774	15.9757	15.6619	15.9423	15.8401	15.9018	15.9798	15.9851	15.8189	16.0048	15.7614	4	2	3	2	2	1	5
>ENSSSCP00000021504	20	0.843319	0.241217	0.945353	0.429733	DES	Sus scrofa desmin (DES), mRNA. [Source:RefSeq mRNA;Acc:NM_001001535]|15|ENSSSCG00000020785|ENSSSCT00000030104	2.35918e+06	1.7515e+06	2.84207e+06	2.32875e+06	2.51439e+06	1.98954e+06	2.57436e+06	1.46415e+06	2.55736e+06	1.79498e+06	1.76696e+06	1.77943e+06	2.23026e+06	3.0414e+06	5.35885e+06	1.52942e+06	1.11125e+06	824836	1.51577e+06	20.7402	21.4385	21.1511	21.2618	21.2958	20.4816	21.2862	20.7755	20.7528	20.763	21.5363	22.3535	20.5446	20.0838	19.6537	20.5316	21	16	10	16	15	17	19
>ENSSSCP00000017706	3	0.54501	0.662839	0.59952	0.818373	DFNA5	deafness, autosomal dominant 5 [Source:HGNC Symbol;Acc:2810]|18|ENSSSCG00000016716|ENSSSCT00000018197	31660.6	12358.1	14123.3	13351.9	86809.2	17255.4	20117.2	15637.9	17080.5	17817.1	22017.1	10862.4	18981.2	20295.2	15086.9	19705.5	19454.9	17200.5	22144.1	13.5932	13.7858	13.7048	16.4056	14.2961	13.9328	14.0601	14.121	14.4263	13.4071	14.3089	13.881	14.2663	14.2478	14.0702	14.4346	0	0	0	0	0	0	3
>ENSSSCP00000000387	3	0.677553	0.006241	0.561289	0.000209344	DGKA	Sus scrofa diacylglycerol kinase, alpha 80kDa (DGKA), mRNA. [Source:RefSeq mRNA;Acc:NM_214032]|5|ENSSSCG00000000370|ENSSSCT00000000393	52279.5	59367.3	48956.4	45499.5	55294.7	35422.1	35555.6	37501	35384.2	34361.7	34702.1	35028	29343.9	27845	36564.3	23638.4	27881.1	25985.6	34149	15.8574	15.5792	15.4736	15.7549	15.1178	15.1946	15.1108	15.0685	15.0827	15.0962	14.7651	15.1581	14.5288	14.767	14.6654	15.0596	3	3	2	4	1	2	2
>ENSSSCP00000024599	4	0.960403	0.594333	1.03466	0.630248	DHCR7	7-dehydrocholesterol reductase [Source:HGNC Symbol;Acc:2860]|2|ENSSSCG00000021181|ENSSSCT00000029497	93154.3	101080	87237.8	81223.8	103076	89465.7	90399.9	87422.6	89916.2	76014.7	101485	91555.4	96382.9	109232	107570	90892.6	90507.2	90043.1	90052.6	16.6251	16.4127	16.3096	16.6533	16.464	16.4157	16.4563	16.214	16.6309	16.4824	16.737	16.7149	16.4719	16.4657	16.4583	16.4585	2	3	2	3	1	1	4
>ENSSSCP00000003425	12	1.00304	0.94471	1.13046	0.0431426	DHDH	Sus scrofa dimeric dihydrodiol dehydrogenase (SUS2DD), mRNA. [Source:RefSeq mRNA;Acc:NM_214166]|6|ENSSSCG00000003158|ENSSSCT00000003508	616580	669416	577353	572946	646605	618457	652944	601526	685139	610464	584143	576524	697019	738981	726110	724684	692949	624235	675154	19.3525	19.1391	19.128	19.3025	19.3166	19.1983	19.386	19.2195	19.156	19.137	19.4952	19.4698	19.467	19.4024	19.2517	19.3649	11	11	11	12	11	10	12
>ENSSSCP00000015020	8	0.993808	0.941666	0.878377	0.189237	DHFR	Sus scrofa dihydrofolate reductase (DHFR), mRNA. [Source:RefSeq mRNA;Acc:NM_001244064]|2|ENSSSCG00000014125|ENSSSCT00000015429	164254	138276	171235	184731	162773	163237	166524	159467	133557	174416	159242	186215	144277	105072	172149	134847	156609	162127	134858	17.0772	17.3856	17.4951	17.3125	17.3454	17.2829	17.0271	17.4122	17.2809	17.5066	16.681	17.3933	17.041	17.2568	17.3068	17.0411	4	5	4	4	3	3	7
>ENSSSCP00000002177	7	0.796323	0.361971	0.976916	0.939849	DHRS1	dehydrogenase/reductase (SDR family) member 1 [Source:HGNC Symbol;Acc:16445]|7|ENSSSCG00000001991|ENSSSCT00000002229	316522	368590	288320	188061	421119	252054	296468	275779	255366	224722	281482	178508	309216	412401	427141	259427	309157	198328	248842	18.4917	18.1373	17.5208	18.6839	18.1775	18.0732	17.9622	17.7778	18.1027	17.4456	18.6537	18.7044	17.985	18.238	17.5975	17.9249	6	6	4	5	2	3	7
>ENSSSCP00000018744	6	1.34831	0.064124	1.04004	0.680598	DHRS11	dehydrogenase/reductase (SDR family) member 11 [Source:HGNC Symbol;Acc:28639]|12|ENSSSCG00000017690|ENSSSCT00000019254	189826	223880	158982	203424	173017	255945	262789	216066	298619	232742	355357	170096	197426	214168	190228	173827	223059	162601	220670	17.7724	17.2785	17.6341	17.4006	18.0035	17.7211	18.1879	17.8284	18.4389	17.376	17.7084	17.5374	17.4073	17.7671	17.311	17.7515	4	5	5	5	3	3	5
>ENSSSCP00000025123	7	1.08135	0.121506	1.21218	0.000270838	DHRS2	|13|ENSSSCG00000020706|ENSSSCT00000027272	451691	445422	453965	466252	441124	488436	474025	452091	540808	557833	458485	447375	547529	501632	559971	574627	588904	544608	515431	18.7648	18.7922	18.8308	18.7508	18.8546	18.7863	19.0448	19.0895	18.8065	18.7711	18.9363	19.095	19.1323	19.1677	19.0549	18.9754	11	13	12	12	7	8	13
>ENSSSCP00000003730	2	0.879643	0.114997	0.762885	0.14987	DHRS3	dehydrogenase/reductase (SDR family) member 3 [Source:HGNC Symbol;Acc:17693]|6|ENSSSCG00000003439|ENSSSCT00000003817	40816.9	38507.5	41356.7	44114.2	39289.3	35904.3	40642.7	43024.2	32979.6	38688	33128.1	26963.5	31138.6	33513.8	10384.9	35123	36738.6	36945.7	34125.7	15.2329	15.3358	15.429	15.2618	15.3107	15.3929	15.0093	15.2396	15.0158	14.7187	15.0325	13.3422	15.1001	15.165	15.1731	15.0586	0	1	0	0	0	0	1
>ENSSSCP00000002200	7	1.02489	0.566246	0.972093	0.510221	DHRS4	Sus scrofa dehydrogenase/reductase (SDR family) member 4 (DHRS4), mRNA. [Source:RefSeq mRNA;Acc:NM_214019]|7|ENSSSCG00000002013|ENSSSCT00000002252	153038	161469	143127	145812	161745	156848	155745	150876	173676	145311	157031	158447	148767	152303	143463	163524	150344	143566	139403	17.3009	17.1269	17.1538	17.3034	17.2488	17.203	17.406	17.1488	17.2607	17.2736	17.2166	17.1303	17.3191	17.1979	17.1314	17.0889	5	6	6	5	6	4	6
>ENSSSCP00000005463	10	0.980674	0.783849	1.04554	0.44324	DHRS7	dehydrogenase/reductase (SDR family) member 7 [Source:HGNC Symbol;Acc:21524]|1|ENSSSCG00000005083|ENSSSCT00000005603	578347	653336	529567	527466	603017	567170	593178	598215	591338	528650	560558	531079	604682	628883	560638	635264	605292	580346	617672	19.3175	19.0145	19.0087	19.2018	19.1781	19.1903	19.1736	19.012	19.0965	19.0186	19.2624	19.0967	19.277	19.2073	19.1466	19.2365	10	10	9	10	6	8	9
>ENSSSCP00000009333	24	0.99914	0.935526	1.01515	0.56076	DHX15	DEAH (Asp-Glu-Ala-His) box helicase 15 [Source:HGNC Symbol;Acc:2738]|8|ENSSSCG00000008756|ENSSSCT00000009580	836642	873118	823005	847549	802896	835923	865131	895083	829909	709239	885228	830945	849314	848105	905424	870009	812665	838188	821492	19.7358	19.6505	19.6929	19.6149	19.7226	19.7717	19.6626	19.4359	19.7557	19.6644	19.6939	19.7882	19.7307	19.6323	19.6769	19.6479	17	21	17	19	13	11	25
>ENSSSCP00000012095	3	0.962044	0.972332	0.979143	0.722636	DHX30	DEAH (Asp-Glu-Ala-His) box helicase 30 [Source:HGNC Symbol;Acc:16716]|13|ENSSSCG00000011342|ENSSSCT00000012419	35632.8	20603.7	35610.5	44932.5	41384.5	34280.3	34582.3	41880.2	30827	27427.4	38710.8	32254.1	34889.6	23180.2	33040.8	52589.2	50458.2	40315.2	9753.99	14.3306	15.12	15.4555	15.3368	15.0777	15.354	14.9119	14.7433	15.2404	14.9772	14.5006	15.012	15.6825	15.6228	15.299	13.2518	1	2	1	1	0	0	2
>ENSSSCP00000021911	6	1.00756	0.94921	1.11225	0.66341	DHX36	Uncharacterized protein [Source:UniProtKB/TrEMBL;Acc:I3LCY3]|13|ENSSSCG00000024916|ENSSSCT00000023601	73865.3	106399	64150.6	61756.9	63154.9	74423.5	108037	59871.1	61562.1	85206.2	60707.4	71156.9	82156.4	80624.5	60474.1	62529.4	64181.7	80859.2	144269	16.6991	15.9692	15.9143	15.9466	16.7212	15.8696	15.9098	16.3787	15.8896	16.1187	16.2989	15.884	15.9322	15.9699	16.3031	17.1384	5	5	2	4	1	2	4
>ENSSSCP00000023695	16	1.01787	0.719622	0.857061	0.0465269	DHX9	Uncharacterized protein [Source:UniProtKB/TrEMBL;Acc:I3LHZ6]|GL892421.2|ENSSSCG00000026806|ENSSSCT00000025297	1.95935e+06	2.20826e+06	1.77231e+06	1.82941e+06	2.02744e+06	1.99436e+06	2.0198e+06	2.06142e+06	1.96173e+06	1.82965e+06	2.04309e+06	2.05046e+06	1.67929e+06	1.82795e+06	1.80385e+06	1.56879e+06	1.57432e+06	1.6386e+06	1.66219e+06	21.0745	20.7572	20.8029	20.9512	20.9458	20.9752	20.9037	20.8031	20.9623	20.9675	20.8018	20.7826	20.5812	20.5863	20.644	20.6647	48	50	46	48	41	40	50
>ENSSSCP00000010461	2	0.978572	0.841312	1.07511	0.360303	DIABLO	Sus scrofa diablo, IAP-binding mitochondrial protein (DIABLO), nuclear gene encoding mitochondrial protein, mRNA. [Source:RefSeq mRNA;Acc:NM_001190216]|14|ENSSSCG00000009799|ENSSSCT00000010741	33334.1	40614.1	31286.3	28812.5	32623.5	32619.8	27240.6	32255.6	33845.5	30666.4	35345	36365.8	35837.9	38218.7	36955.8	34240	34008.9	35285.2	36318.8	15.3097	14.9332	14.8144	14.9936	14.7335	14.9773	15.0467	14.9044	15.1092	15.1503	15.222	15.1735	15.0634	15.0536	15.1068	15.1484	1	1	2	2	2	1	2
>ENSSSCP00000015309	10	1.05565	0.406553	1.01872	0.866744	DIAPH1	diaphanous-related formin 1 [Source:HGNC Symbol;Acc:2876]|2|ENSSSCG00000014387|ENSSSCT00000015724	103276	119428	97088.4	93757.8	102828	109023	121548	105404	113745	104656	97366.4	111419	105209	93265.5	91558.6	101595	111190	98480.1	135166	16.8658	16.567	16.5167	16.6499	16.8912	16.6856	16.7954	16.6753	16.5711	16.7656	16.5091	16.4824	16.6325	16.7627	16.5875	17.0444	4	8	4	5	0	1	5
>ENSSSCP00000013271	2	0.883449	0.797374	0.750743	0.382327	DIAPH2	diaphanous-related formin 2 [Source:HGNC Symbol;Acc:2877]|X|ENSSSCG00000012474|ENSSSCT00000013641	11227	12801.9	17789	6220.57	8096.58	9918.49	9727.62	8051.83	11513.6	14004.2	9480.6	6733.14	8428.6	6288.28	3524.88	10410.8	10003	8130.8	12213.9	13.6441	14.1187	12.6028	12.9831	13.2479	12.9751	13.491	13.7736	13.2108	12.7171	12.6185	11.7834	13.3458	13.2881	12.9892	13.5762	1	0	0	2	0	0	1
>ENSSSCP00000020358	25	0.96694	0.583733	1.02803	0.583302	DIP2B	DIP2 disco-interacting protein 2 homolog B (Drosophila) [Source:HGNC Symbol;Acc:29284]|5|ENSSSCG00000029196|ENSSSCT00000028346	440063	487023	438814	386423	447991	425514	436469	463882	426085	383868	426878	415905	452399	446749	430466	440243	456445	455922	484568	18.8936	18.7433	18.5598	18.7731	18.7355	18.8234	18.7008	18.5502	18.7035	18.6659	18.7691	18.7155	18.7479	18.8001	18.7984	18.8863	11	19	16	16	9	9	23
>ENSSSCP00000010100	3	0.786785	0.218488	0.742379	0.137629	DIS3	DIS3 mitotic control homolog (S. cerevisiae) [Source:HGNC Symbol;Acc:20604]|11|ENSSSCG00000009460|ENSSSCT00000010370	62605.6	86573.7	44124	57855.8	61868.8	49257.1	57620.9	52643.8	53566.1	43888	43278.7	44545.1	46477	48234.3	38556.4	58454.2	43052.5	45332.1	45232.8	16.4016	15.4293	15.8202	15.9169	15.8143	15.684	15.709	15.4215	15.4014	15.443	15.5578	15.2347	15.835	15.3938	15.4682	15.4651	0	0	0	0	0	0	2
>ENSSSCP00000026098	2	1.18246	0.206473	1.0057	0.869068	DIS3L	Uncharacterized protein [Source:UniProtKB/TrEMBL;Acc:I3LPS1]|11|ENSSSCG00000021485|ENSSSCT00000022899	35579.9	44020	25843.5	33633.4	38822.7	42071.9	46561.5	37982.3	44934.7	39185.4	41578.5	42189.3	35782.7	54238	39303	33841.2	42019.7	17804.2	27490.2	15.4259	14.6575	15.0376	15.2446	15.5069	15.213	15.4555	15.258	15.3435	15.3646	15.727	15.2624	15.0465	15.3588	14.1199	14.7466	1	1	2	2	0	1	2
>ENSSSCP00000013633	14	1.10835	0.0919595	1.0695	0.173363	DKC1	dyskeratosis congenita 1, dyskerin [Source:HGNC Symbol;Acc:2890]|X|ENSSSCG00000012823|ENSSSCT00000014017	252959	262687	258374	237247	253527	280368	314586	305518	267575	235802	298015	260712	270540	304864	254122	250908	243338	283986	286024	18.003	17.9791	17.856	17.9518	18.2631	18.2209	18.0296	17.8472	18.185	17.9921	18.2178	17.9552	17.9368	17.8926	18.1155	18.1258	13	12	10	14	6	9	14
>ENSSSCP00000015954	14	0.885649	0.00370441	0.939308	0.0769231	DLAT	Sus scrofa dihydrolipoamide S-acetyltransferase (DLAT), nuclear gene encoding mitochondrial protein, mRNA. [Source:RefSeq mRNA;Acc:NM_213994]|9|ENSSSCG00000015030|ENSSSCT00000016395	756081	797832	734294	732307	759889	669622	663343	687091	713895	615602	694737	643063	710193	729561	688674	762711	691144	648996	740071	19.6057	19.486	19.4821	19.5354	19.3394	19.3901	19.4454	19.2316	19.4061	19.2946	19.4767	19.3935	19.5408	19.3986	19.3078	19.4973	11	12	11	13	9	11	13
>ENSSSCP00000016374	15	0.974574	0.383189	1.04798	0.130226	DLD	Sus scrofa dihydrolipoamide dehydrogenase (DLD), mRNA. [Source:RefSeq mRNA;Acc:NM_214062]|9|ENSSSCG00000015443|ENSSSCT00000016824	640691	629415	620060	666075	647215	624401	604854	620647	688170	613752	642274	576710	671431	667324	702401	719734	671052	650049	618028	19.2637	19.242	19.3453	19.3039	19.2062	19.2434	19.3924	19.2273	19.2928	19.1375	19.348	19.4219	19.4571	19.3561	19.3102	19.2373	12	11	13	11	11	11	13
>ENSSSCP00000002572	15	0.933505	0.0326857	0.941638	0.0628717	DLST	Sus scrofa dihydrolipoamide S-succinyltransferase (E2 component of 2-oxo-glutarate complex) (DLST), nuclear gene encoding mitochondrial protein, mRNA. [Source:RefSeq mRNA;Acc:NM_214397]|7|ENSSSCG00000002374|ENSSSCT00000002639	1.10683e+06	1.09021e+06	1.08541e+06	1.1259e+06	1.1258e+06	1.03323e+06	1.0085e+06	1.02901e+06	1.13933e+06	1023749	1.04758e+06	951218	1.04223e+06	1.03049e+06	975012	1.1617e+06	1.05271e+06	985761	1.04773e+06	20.0562	20.0498	20.1026	20.1025	19.9438	19.9728	20.1198	19.9654	19.9986	19.8594	19.9749	19.8951	20.1478	20.0057	19.9109	19.9988	13	15	15	14	13	11	15
>ENSSSCP00000012992	3	1.08704	0.171905	1.13099	0.0363795	DMD	Sus scrofa dystrophin (DMD), mRNA. [Source:RefSeq mRNA;Acc:NM_001012408]|X|ENSSSCG00000028148|ENSSSCT00000013350	57030	55309.8	58052.7	55759.9	58997.8	61994	57566.1	50404.5	68509.2	62314.8	67894.1	65275.5	64500.4	73101.2	61157.4	72145.2	64467.1	57686.4	58445.2	15.7552	15.8251	15.7669	15.8484	15.8129	15.6213	16.064	15.9273	16.051	15.9943	16.1576	15.9002	16.1386	15.9763	15.8159	15.8348	5	5	4	5	1	4	7
>ENSSSCP00000002746	47	0.952008	0.835707	1.09784	0.478417	DNAH3	Uncharacterized protein [Source:UniProtKB/TrEMBL;Acc:F1S9Y8]|GL894441.2|ENSSSCG00000002538|ENSSSCT00000002818	3.63587e+06	4760127	2.75832e+06	3.03568e+06	3.98934e+06	3.46137e+06	3.73548e+06	3562293	3.79583e+06	3.20593e+06	2.97485e+06	3493861	3.99159e+06	4428483	4.8314e+06	3500971	3.64887e+06	3301790	4.23803e+06	22.1826	21.3954	21.5336	21.9277	21.8329	21.7644	21.856	21.6123	21.5044	21.7364	22.0784	22.204	21.7393	21.799	21.6548	22.015	41	46	42	44	30	33	47
>ENSSSCP00000011734	15	0.973282	0.636203	0.938544	0.281467	DNAJA1	DnaJ (Hsp40) homolog, subfamily A, member 1 [Source:HGNC Symbol;Acc:5229]|10|ENSSSCG00000011000|ENSSSCT00000012042	578940	536291	638318	607687	533465	563472	582744	538575	539004	588706	587220	544581	543361	495327	536735	572209	536355	541795	577743	19.0327	19.2839	19.213	19.025	19.1525	19.0388	19.0399	19.1672	19.1635	19.0548	18.918	19.0338	19.1262	19.0328	19.0474	19.1401	11	13	15	11	10	11	14
>ENSSSCP00000003066	16	0.945202	0.205091	1.03681	0.557362	DNAJA2	DnaJ (Hsp40) homolog, subfamily A, member 2 [Source:HGNC Symbol;Acc:14884]|6|ENSSSCG00000002846|ENSSSCT00000003147	1.03209e+06	997469	1.00525e+06	1.13626e+06	989359	975529	937339	952128	1.03184e+06	1.01353e+06	910946	1.00739e+06	1.07008e+06	1.04799e+06	975734	1.26601e+06	1094706	1.09758e+06	938442	19.9279	19.9391	20.1159	19.9161	19.8382	19.8608	19.9768	19.951	19.797	19.9422	19.9992	19.8961	20.2719	20.0621	20.0659	19.8399	12	15	15	12	10	11	15
>ENSSSCP00000001916	2	0.141074	0.00353632	0.120419	0.00249379	DNAJA4	Sus scrofa DnaJ (Hsp40) homolog, subfamily A, member 4 (DNAJA4), mRNA. [Source:RefSeq mRNA;Acc:NM_214339]|7|ENSSSCG00000001759|ENSSSCT00000001965	32963.4	62374.6	23605.1	22120.7	23753.4	4650.27	5709.96	3854.92	4953.73	4844.26	4675.85	3862.92	3969.43	3725.04	2997.56	3719.27	5001.91	4220.79	4152.02	15.9287	14.5268	14.4331	14.5358	12.4793	11.9125	12.2743	12.2421	12.191	11.9155	11.863	11.5496	11.8608	12.2883	12.0433	12.0196	0	0	0	0	1	0	3
>ENSSSCP00000014656	2	0.90593	0.447237	0.972646	0.836099	DNAJB1	Sus scrofa DnaJ (Hsp40) homolog, subfamily B, member 1 (DNAJB1), mRNA. [Source:RefSeq mRNA;Acc:NM_001244430]|2|ENSSSCG00000013784|ENSSSCT00000015061	82843.1	77876.1	84220.5	103337	65939.3	75050.1	74115.7	80966	83608.6	47935.6	78080.7	85593.8	80577	74317.6	78268.9	100127	84724.9	63098.2	82925.4	16.2489	16.3619	16.657	16.0089	16.1775	16.305	16.3514	15.5488	16.2527	16.3852	16.1814	16.2562	16.6115	16.3705	15.9453	16.3395	7	6	6	6	6	4	6
>ENSSSCP00000012569	10	0.909974	0.208034	1.05823	0.378394	DNAJB11	DnaJ (Hsp40) homolog, subfamily B, member 11 [Source:HGNC Symbol;Acc:14889]|13|ENSSSCG00000011798|ENSSSCT00000012910	1.44402e+06	1.23085e+06	1.58211e+06	1.51715e+06	1.44597e+06	1.31402e+06	1.28289e+06	1.17723e+06	1.49418e+06	1.38379e+06	1.31403e+06	1.23201e+06	1.5281e+06	1.5015e+06	1.44395e+06	1.66326e+06	1.63152e+06	1.49072e+06	1.43765e+06	20.2312	20.5934	20.5329	20.4636	20.291	20.167	20.5109	20.4002	20.3256	20.2326	20.518	20.4616	20.6656	20.6378	20.5076	20.4553	10	10	10	9	9	9	10
>ENSSSCP00000017180	2	1.18809	0.30299	1.28859	0.16663	DNAJB2	DnaJ (Hsp40) homolog, subfamily B, member 2 [Source:HGNC Symbol;Acc:5228]|15|ENSSSCG00000016217|ENSSSCT00000017658	15289	16351.9	9500.32	18330.3	16973.5	18164.6	17758.4	15357.7	18470.5	20892.6	21834.5	14674.1	19701.2	17860.8	19057.6	24502.9	22590.5	16522.2	17673	13.9972	13.2138	14.1619	14.051	14.1162	13.9067	14.1729	14.3507	14.4143	13.841	14.1245	14.2181	14.5807	14.4634	14.0121	14.1093	2	2	3	3	0	1	4
>ENSSSCP00000004074	10	1.13865	0.00303377	0.947553	0.128145	DNAJB4	DnaJ (Hsp40) homolog, subfamily B, member 4 [Source:HGNC Symbol;Acc:14886]|6|ENSSSCG00000003766|ENSSSCT00000004168	208419	210034	214655	208203	200785	237316	261318	227806	239597	246028	231221	217928	197488	192507	177575	206127	201360	189561	217798	17.6803	17.7117	17.6676	17.6153	17.9954	17.7974	17.8702	17.9085	17.8189	17.7335	17.5545	17.4381	17.6532	17.6194	17.5323	17.7326	7	9	6	5	4	3	9
>ENSSSCP00000016971	6	0.95547	0.200163	1.0736	0.118042	DNAJC10	DnaJ (Hsp40) homolog, subfamily C, member 10 [Source:HGNC Symbol;Acc:24637]|15|ENSSSCG00000016017|ENSSSCT00000017440	152554	149333	159394	150865	150626	145761	138229	163440	133809	139998	153073	146018	163782	150783	143463	173642	175229	175075	164502	17.1882	17.2822	17.2029	17.2006	17.0767	17.3184	17.0298	17.095	17.2239	17.1558	17.2021	17.1303	17.4058	17.4189	17.4176	17.3277	5	5	5	4	3	3	5
>ENSSSCP00000012391	24	1.08225	0.262375	1.08076	0.227993	DNAJC13	DnaJ (Hsp40) homolog, subfamily C, member 13 [Source:HGNC Symbol;Acc:30343]|13|ENSSSCG00000011628|ENSSSCT00000012725	327995	361625	293733	307227	349396	354974	379303	361012	362523	289613	369350	368043	354485	371302	347282	319945	347393	346638	394353	18.4641	18.1641	18.2289	18.4145	18.533	18.4617	18.4677	18.1438	18.4946	18.4895	18.5022	18.4057	18.2875	18.4062	18.4031	18.5891	12	15	12	14	5	4	22
>ENSSSCP00000016353	2	0.965776	0.926923	0.791599	0.255448	DNAJC2	DnaJ (Hsp40) homolog, subfamily C, member 2 [Source:HGNC Symbol;Acc:13192]|9|ENSSSCG00000015423|ENSSSCT00000016801	24924.4	24644.5	16203.1	32872.8	25977.2	24071.4	19988.3	30897.9	24068.2	20784.2	21829.3	26860.4	19730.1	22668.8	25156.4	18336.3	16016.9	11836.9	24365.5	14.589	13.984	15.0046	14.665	14.2869	14.9152	14.5548	14.3432	14.414	14.7132	14.4684	14.6186	14.1624	13.9673	13.531	14.5726	4	5	6	3	2	3	6
>ENSSSCP00000021430	3	0.948258	0.589397	1.31198	0.0243603	DNAJC3	DnaJ (Hsp40) homolog, subfamily C, member 3 [Source:HGNC Symbol;Acc:9439]|11|ENSSSCG00000026082|ENSSSCT00000026790	56294.8	46900.3	61678.8	64397.7	52202.3	53382	39202.2	45437.8	72477.1	55079.1	53407.8	54687.7	73857.5	77343.6	70962.2	84533.5	71709.5	66998	71598.4	15.5173	15.9125	15.9747	15.6718	15.2586	15.4716	16.1452	15.7492	15.7048	15.7389	16.239	16.1148	16.3672	16.1299	16.0318	16.1276	1	3	1	1	1	1	2
>ENSSSCP00000018458	5	0.970803	0.439224	0.926969	0.12989	DNAJC7	DnaJ (Hsp40) homolog, subfamily C, member 7 [Source:HGNC Symbol;Acc:12392]|12|ENSSSCG00000017419|ENSSSCT00000018963	55680.1	51362.9	55849.3	59533	55975.2	54054.4	51274.3	54691.4	57284	53610.5	54950.9	52515.2	51613.8	49210.4	57443.8	55472	52943	46521.8	48091.4	15.6484	15.7693	15.8614	15.7725	15.6459	15.739	15.8058	15.7102	15.7459	15.6804	15.5867	15.8099	15.7595	15.6922	15.5056	15.5535	5	6	6	6	1	2	6
>ENSSSCP00000014601	2	1.15415	0.234946	0.992629	0.875784	DNASE2	deoxyribonuclease II, lysosomal [Source:HGNC Symbol;Acc:2960]|2|ENSSSCG00000013731|ENSSSCT00000015005	20089.5	15867.9	21726	21978.5	20785.4	23186.2	21823.6	22493	18458	31933.9	22487.4	21921.6	19941.4	13039.3	18790.5	18475	24152	24047.4	21144	13.9538	14.4071	14.4238	14.3433	14.4136	14.4572	14.172	14.9628	14.4568	14.4201	13.6706	14.1977	14.1733	14.5599	14.5536	14.368	1	2	0	1	0	1	2
>ENSSSCP00000014484	15	1.05659	0.26635	1.0713	0.167589	DNM2	dynamin 2 [Source:HGNC Symbol;Acc:2974]|2|ENSSSCG00000013630|ENSSSCT00000014885	525689	569122	485538	497733	550362	555438	593369	560731	587187	511778	532214	547348	563171	595718	541720	539152	559749	549195	593493	19.1184	18.8892	18.925	19.07	19.1786	19.0969	19.1635	18.9652	19.0216	19.0621	19.1843	19.0472	19.0403	19.0944	19.067	19.1789	19	21	18	17	13	14	23
>ENSSSCP00000017183	14	1.23774	0.0248482	1.28317	0.0166548	DNPEP	aspartyl aminopeptidase [Source:HGNC Symbol;Acc:2981]|15|ENSSSCG00000016220|ENSSSCT00000017661	564861	648383	530105	495134	585823	699149	816181	672611	719234	649519	698583	638766	724815	769516	719374	715063	673053	695362	776520	19.3065	19.0159	18.9175	19.1601	19.6385	19.3594	19.4561	19.309	19.4141	19.2849	19.5536	19.4564	19.4477	19.3604	19.4074	19.5667	8	9	8	9	10	7	13
>ENSSSCP00000004130	6	0.868558	0.0902538	0.785725	0.0259129	DOCK7	Uncharacterized protein [Source:UniProtKB/TrEMBL;Acc:F1S7Z8]|6|ENSSSCG00000003818|ENSSSCT00000004225	56201.8	48257.8	55464.2	58994.5	62090.7	48814.6	48194.2	48565.1	57028	41445.6	44418.7	53235.8	44159.2	50522.1	35964.1	51798.8	44918.2	47910.9	33840.9	15.5585	15.7593	15.8483	15.9221	15.5566	15.5676	15.7994	15.3389	15.4389	15.7001	15.6246	15.1343	15.6606	15.455	15.5481	15.0465	3	3	2	3	2	1	6
>ENSSSCP00000007962	3	1.06718	0.618249	1.14466	0.324405	DPM1	Sus scrofa dolichyl-phosphate mannosyltransferase polypeptide 1, catalytic subunit (DPM1), mRNA. [Source:RefSeq mRNA;Acc:NM_001101820]|17|ENSSSCG00000007474|ENSSSCT00000008179	174068	206450	160318	141333	188171	185762	165587	206706	165726	137551	232541	206459	199249	215419	212581	240913	221643	136054	168886	17.6554	17.2906	17.1087	17.5217	17.3372	17.6572	17.3384	17.0696	17.8271	17.6555	17.7168	17.6976	17.8782	17.7579	17.0538	17.3657	5	5	5	4	4	4	7
>ENSSSCP00000006957	2	0.991604	0.857955	1.05819	0.355971	DPM3	dolichyl-phosphate mannosyltransferase polypeptide 3 [Source:HGNC Symbol;Acc:3007]|4|ENSSSCG00000006528|ENSSSCT00000007150	77572.1	79671.4	78931.5	69957.6	81728	76920.9	79349.3	74883.3	76925.9	79738.8	76454.9	74173	82085.9	82917.6	95788.6	72004.4	80544.2	74369.2	86891.5	16.2818	16.2683	16.0942	16.3185	16.2759	16.1924	16.2312	16.283	16.2223	16.1786	16.3394	16.5476	16.1358	16.2975	16.1824	16.4069	2	2	2	2	1	1	2
>ENSSSCP00000020307	3	0.935145	0.330544	0.990969	0.877736	DPP3	Uncharacterized protein [Source:UniProtKB/TrEMBL;Acc:F1RU52]|2|ENSSSCG00000029317|ENSSSCT00000025557	178927	206938	164029	171219	173520	167322	168818	166366	173958	159031	146430	189331	177311	212315	192373	181109	164620	154186	159261	17.6588	17.3236	17.3855	17.4047	17.3651	17.344	17.4084	17.2789	17.1599	17.5306	17.6958	17.5535	17.4665	17.3288	17.2343	17.281	25	28	24	25	24	21	29
>ENSSSCP00000027633	2	0.859252	0.0251277	0.854206	0.0259658	DPP7	dipeptidyl-peptidase 7 [Source:HGNC Symbol;Acc:14892]|GL896476.1|ENSSSCG00000027350|ENSSSCT00000030975	36539.4	37083.1	37614.7	32340.4	39119.4	31396.6	32864	28810.9	32200.1	30703.5	34025.7	29775.2	31212.2	31061	29854.1	33330.3	30382.8	31013.6	31631.2	15.1785	15.199	14.9811	15.2556	15.0042	14.8143	14.9748	14.9061	15.0543	14.8618	14.9228	14.8656	15.0245	14.891	14.9206	14.9491	2	2	1	2	2	1	2
>ENSSSCP00000023074	3	0.91598	0.172844	1.01027	0.931681	DPY19L1	dpy-19-like 1 (C. elegans) [Source:HGNC Symbol;Acc:22205]|18|ENSSSCG00000027063|ENSSSCT00000028124	62053.6	59008.2	59686.2	59926.5	69593.6	56839.9	64281.7	59854.2	57936.7	47468.9	51379.4	60118.4	62690.8	76702.3	59246.3	68617	55744.6	56307.9	59526.9	15.8486	15.8651	15.8709	16.0867	15.9721	15.8692	15.8222	15.5347	15.6489	15.8755	16.227	15.8544	16.0663	15.7665	15.7811	15.8613	2	2	2	2	1	1	2
>ENSSSCP00000009082	2	1.04437	0.819907	0.913544	0.586411	DPY30	dpy-30 homolog (C. elegans) [Source:HGNC Symbol;Acc:24590]|3|ENSSSCG00000008516|ENSSSCT00000009320	39405.2	25994.8	28474.2	70024	33127.7	41153.7	24646.5	31292.9	30410.6	67673.9	38749.8	54148.7	35998.4	10033.6	74795.8	25898.7	30211.2	55576.2	19474.9	14.6659	14.7974	16.0956	15.0158	14.5891	14.9335	14.8923	16.0463	15.2419	15.7246	13.2925	16.1907	14.6606	14.8828	15.7622	14.2493	2	2	2	2	0	0	2
>ENSSSCP00000024202	25	1.05102	0.0693777	1.07778	0.0336979	DPYSL2	dihydropyrimidinase-like 2 [Source:HGNC Symbol;Acc:3014]|14|ENSSSCG00000030130|ENSSSCT00000031898	18667600	19361094	18597470	18217362	18494474	1.962e+07	19550138	18463344	19566842	21283486	19805380	19051090	2.01195e+07	18571482	19488436	21928800	21241186	19563334	19923808	24.2067	24.1486	24.1188	24.1406	24.2207	24.1382	24.2219	24.3432	24.2394	24.1834	24.1466	24.2161	24.3863	24.3404	24.2216	24.248	25	25	25	25	24	23	25
>ENSSSCP00000011472	2	0.981184	0.774955	1.01928	0.735981	DPYSL4	dihydropyrimidinase-like 4 [Source:HGNC Symbol;Acc:3016]|14|ENSSSCG00000010762|ENSSSCT00000011774	356503	405943	319345	348504	352219	349795	368996	324641	337470	359989	382870	324802	363375	368915	392165	378678	378164	334998	327331	18.6309	18.2848	18.4108	18.4261	18.4932	18.3085	18.3644	18.4576	18.5465	18.3092	18.4929	18.5811	18.5306	18.5287	18.3538	18.3204	2	2	1	2	2	2	2
>ENSSSCP00000009125	11	0.987445	0.766202	1.03941	0.490591	DPYSL5	dihydropyrimidinase-like 5 [Source:HGNC Symbol;Acc:20637]|3|ENSSSCG00000008560|ENSSSCT00000009365	193148	180637	203548	203101	185307	190723	192012	173334	213763	201582	188856	174792	200759	188599	201106	222183	218835	202540	171294	17.4627	17.635	17.6318	17.4996	17.5508	17.4032	17.7056	17.621	17.5269	17.4153	17.525	17.6176	17.7614	17.7395	17.6278	17.3861	4	10	8	5	2	3	10
>ENSSSCP00000013786	3	0.956845	0.642453	0.929556	0.449547	DRAP1	DR1-associated protein 1 (negative cofactor 2 alpha) [Source:HGNC Symbol;Acc:3019]|2|ENSSSCG00000012965|ENSSSCT00000014172	77545.8	93092.7	79056.3	69367.5	68666.8	74199.3	73741.6	59283	75176.3	89441.8	76198	71355.2	72083.2	82712.5	80379.4	79634.5	67029.9	61969.3	60773.3	16.5064	16.2706	16.082	16.0673	16.1702	15.8553	16.198	16.4487	16.2175	16.1227	16.3358	16.2945	16.2811	16.0325	15.9193	15.8912	2	2	2	2	1	1	3
>ENSSSCP00000010699	7	0.923203	0.06743	0.853605	0.00027787	DRG1	developmentally regulated GTP binding protein 1 [Source:HGNC Symbol;Acc:3029]|14|ENSSSCG00000010029|ENSSSCT00000010986	172678	179187	168345	168002	175177	159416	162043	165241	178981	143815	144238	162180	147398	158240	146932	140078	148954	138311	151875	17.4511	17.3611	17.3581	17.4185	17.306	17.3342	17.4494	17.1339	17.1381	17.3072	17.2718	17.1648	17.0959	17.1845	17.0776	17.2125	5	6	6	5	3	5	7
>ENSSSCP00000012843	6	1.00115	0.999517	1.03115	0.6386	DSCR3	Down syndrome critical region gene 3 [Source:HGNC Symbol;Acc:3044]|13|ENSSSCG00000012063|ENSSSCT00000013195	91266.8	97158.8	86862.3	90753.9	90292.3	91371.6	90211.9	100370	87455.3	97712.5	84307.6	88172.4	94109.5	93801.7	99462.4	77954.5	95241.8	88102.6	110094	16.5681	16.4064	16.4697	16.4623	16.461	16.615	16.4163	16.5763	16.3634	16.428	16.5173	16.6019	16.2503	16.5393	16.4269	16.7484	5	6	3	4	1	2	6
>ENSSSCP00000020931	2	1.51902	0.231614	1.2189	0.496157	DSG1	desmoglein 1 [Source:HGNC Symbol;Acc:3048]|6|ENSSSCG00000020694|ENSSSCT00000022644	35943.4	30227.6	44621.8	15674.8	53249.3	54598.9	44043.8	24418.9	83866.3	69529.8	40738.6	64995.8	43811.4	71372.5	43696.9	37329.3	21048.3	50895.3	38526.1	14.8836	15.4455	13.9362	15.7005	15.4267	14.5757	16.3558	16.0853	15.3141	15.9881	16.1231	15.4152	15.188	14.3614	15.6352	15.2335	1	0	0	0	2	0	0
>ENSSSCP00000001096	3	0.960052	0.983274	0.574647	0.594923	DSP	desmoplakin [Source:HGNC Symbol;Acc:3052]|7|ENSSSCG00000001025|ENSSSCT00000001118	47497.2	98542.5	68433.1	14914.9	8098.48	45599.8	14102.2	11935.4	133293	57216.2	14945.6	42106.6	27294.1	85308.1	11619	18278.2	19404.9	13799.5	15355.1	16.5885	16.0624	13.8645	12.9834	13.7836	13.543	17.0242	15.8041	13.8674	15.3618	16.3804	13.5042	14.1578	14.2441	13.7523	13.9064	1	1	1	0	2	1	1
>ENSSSCP00000001627	70	0.884686	0.00272237	0.779981	6.15844e-05	DST	dystonin [Source:HGNC Symbol;Acc:1090]|7|ENSSSCG00000001499|ENSSSCT00000001671	1.07161e+06	1.04233e+06	1.11575e+06	1.10112e+06	1.02726e+06	948040	918357	962587	917097	942593	919355	1.02825e+06	835838	865386	831869	783893	785366	823070	925443	19.9914	20.0896	20.0705	19.9704	19.8087	19.8766	19.8067	19.8463	19.8103	19.9718	19.723	19.666	19.5803	19.583	19.6507	19.8198	46	64	58	48	10	21	61
>ENSSSCP00000007548	11	0.978674	0.705792	0.984675	0.764923	DSTN	Sus scrofa destrin (actin depolymerizing factor) (DSTN), mRNA. [Source:RefSeq mRNA;Acc:NM_001004031]|17|ENSSSCG00000007085|ENSSSCT00000007757	4.22158e+06	4.1847e+06	3.83647e+06	4.70756e+06	4.15757e+06	4.13154e+06	3.54336e+06	4.12781e+06	4099673	4837587	3.93671e+06	4244127	4.15688e+06	2.76878e+06	5.09124e+06	4262152	4.15616e+06	4.57941e+06	4083524	21.9967	21.8713	22.1665	21.9873	21.7567	21.9769	21.9671	22.2059	21.9086	22.017	21.4008	22.2796	22.0232	21.9868	22.1267	21.9614	11	11	11	11	10	9	11
>ENSSSCP00000007561	3	0.959213	0.452872	0.930471	0.248353	DTD1	D-tyrosyl-tRNA deacylase 1 [Source:HGNC Symbol;Acc:16219]|17|ENSSSCG00000007098|ENSSSCT00000007770	66600	58472.6	68796.8	67698.1	71432.6	63883.6	65089.8	58297.7	66424.6	66398.8	63879.2	63211.5	61969.4	55819.6	60699.1	69943.1	65416.7	55693.5	64244.5	15.8355	16.0701	16.0468	16.1243	15.9901	15.8312	16.0194	16.0189	15.9631	15.9479	15.7685	15.8894	16.0939	15.9974	15.7652	15.9713	2	3	2	3	2	2	3
>ENSSSCP00000027670	3	1.04602	0.789647	1.02198	0.738985	DTD2	Uncharacterized protein [Source:UniProtKB/TrEMBL;Acc:I3LU71]|7|ENSSSCG00000026663|ENSSSCT00000032499	42061.3	46030.5	36157.8	39569.3	46487.7	43997	37200.5	30614.5	42184.9	57539.5	49487	46955.4	42985.7	39010.1	39241.9	48132.8	44142.3	42600.4	44786.7	15.4903	15.142	15.2721	15.5046	15.183	14.9019	15.3644	15.8123	15.5948	15.519	15.2516	15.2601	15.5547	15.4299	15.3786	15.4508	0	2	2	1	1	1	2
>ENSSSCP00000023026	2	1.52342	1.67414e-05	1.56612	0.0507931	DTNA	|6|ENSSSCG00000029762|ENSSSCT00000032134	6393.57	6464.74	6408.88	6318.16	6382.49	9740.1	9197.74	9467.79	9435.17	10595.4	9140.12	10604.4	10013.1	10146	11035.5	4480.06	11840.6	12729.3	9847.22	12.6584	12.6459	12.6253	12.6399	13.1671	13.2088	13.2038	13.3711	13.158	13.3724	13.3086	13.4299	12.1293	13.5315	13.6359	13.2655	0	2	2	1	0	0	1
>ENSSSCP00000021901	5	1.06815	0.300391	1.19688	0.0232127	DUSP3	dual specificity phosphatase 3 [Source:HGNC Symbol;Acc:3069]|12|ENSSSCG00000020744|ENSSSCT00000024088	130857	127983	115576	146009	133860	139775	129429	135382	150447	154364	142250	126777	156620	146966	158329	172740	161110	160790	139784	16.9656	16.8185	17.1557	17.0304	16.9818	17.0467	17.1989	17.236	17.1181	16.9519	17.1651	17.2726	17.3982	17.2977	17.2948	17.0928	6	4	4	4	3	4	5
>ENSSSCP00000016262	5	0.953602	0.131824	1.06655	0.0465405	DYNC1I1	dynein, cytoplasmic 1, intermediate chain 1 [Source:HGNC Symbol;Acc:2963]|9|ENSSSCG00000015335|ENSSSCT00000016708	160831	159478	168963	155741	159142	153369	139278	155301	163301	156402	157798	148132	171535	164893	162916	172996	187294	174021	167091	17.283	17.3663	17.2488	17.28	17.0876	17.2447	17.3172	17.2549	17.2677	17.1765	17.3312	17.3138	17.4004	17.5149	17.4089	17.3503	6	8	6	6	2	5	9
>ENSSSCP00000016901	13	0.926466	0.115731	0.968399	0.418508	DYNC1I2	dynein, cytoplasmic 1, intermediate chain 2 [Source:HGNC Symbol;Acc:2964]|15|ENSSSCG00000015948|ENSSSCT00000017365	1.18652e+06	1.16178e+06	1.29267e+06	1.14141e+06	1150205	1.09927e+06	1.0645e+06	1.18986e+06	1.12066e+06	1.02309e+06	990367	1.20713e+06	1.14902e+06	1.17529e+06	1.23005e+06	1.04215e+06	1.13337e+06	1.13388e+06	1.17938e+06	20.1479	20.3019	20.1224	20.1335	20.0217	20.1824	20.0959	19.9645	19.9176	20.2032	20.1646	20.2303	19.9911	20.1122	20.1128	20.1696	11	12	11	12	11	10	12
>ENSSSCP00000011981	16	1.12464	0.0116562	1.15271	0.00573679	DYNC1LI1	dynein, cytoplasmic 1, light intermediate chain 1 [Source:HGNC Symbol;Acc:18745]|13|ENSSSCG00000011233|ENSSSCT00000012300	313035	325685	296266	305751	324438	352052	391275	364969	328071	333281	338318	356395	360839	388135	331122	332508	355426	366333	391511	18.3131	18.1765	18.222	18.3076	18.5778	18.4774	18.3236	18.3464	18.368	18.4431	18.5662	18.337	18.343	18.4392	18.4828	18.5787	7	10	9	10	4	4	14
>ENSSSCP00000026472	14	1.04436	0.334416	1.07601	0.181304	DYNC1LI2	dynein, cytoplasmic 1, light intermediate chain 2 [Source:HGNC Symbol;Acc:2966]|GL893319.1|ENSSSCG00000030184|ENSSSCT00000023174	960960	969904	990567	857396	1.02597e+06	1.00358e+06	998916	1012245	1.01029e+06	962020	994443	1.04359e+06	1.034e+06	1.05627e+06	1.06528e+06	905004	1.01722e+06	1.04259e+06	1.11764e+06	19.8875	19.9179	19.7096	19.9686	19.93	19.9491	19.9463	19.8757	19.9235	19.9931	20.0105	20.0228	19.7876	19.9562	19.9917	20.092	12	11	11	11	10	9	13
>ENSSSCP00000010570	2	1.18024	0.197766	1.12707	0.303813	DYNLL1	Sus scrofa dynein, light chain, LC8-type 1 (DYNLL1), mRNA. [Source:RefSeq mRNA;Acc:NM_001195114]|14|ENSSSCG00000009904|ENSSSCT00000010854	529059	622918	543886	528713	420717	624418	635970	667776	520728	508506	565225	848301	596286	609472	732165	441853	598599	633124	562504	19.2487	19.0529	19.0121	18.6825	19.2786	19.349	18.9902	18.9559	19.1085	19.6942	19.2172	19.4818	18.7532	19.1912	19.2721	19.1015	3	3	3	3	3	3	4
>ENSSSCP00000007751	5	0.945409	0.742855	0.919762	0.599955	DYNLRB1	dynein, light chain, roadblock-type 1 [Source:HGNC Symbol;Acc:15468]|17|ENSSSCG00000007279|ENSSSCT00000007964	268711	203538	228882	409935	232489	254042	152164	246341	179237	407492	210687	328328	247150	100073	386310	191895	255131	367564	181928	17.6349	17.8042	18.645	17.8268	17.2153	17.9103	17.4515	18.6364	17.6847	18.3248	16.6107	18.5594	17.55	17.9609	18.4876	17.473	4	4	4	4	2	2	3
>ENSSSCP00000019639	6	0.951751	0.391172	0.728345	0.0120409	EBNA1BP2	EBNA1 binding protein 2 [Source:HGNC Symbol;Acc:15531]|6|ENSSSCG00000030177|ENSSSCT00000022964	85335.3	88076.9	88541.3	85720.1	79003	81218	85446.9	88394.1	64934.8	88688.8	88345.9	71497.3	62153.6	70133.7	68881.8	82784	47935.3	52077.9	51108.8	16.4265	16.4341	16.3873	16.2696	16.3827	16.4317	15.9867	16.4365	16.4309	16.1256	16.0978	16.0718	16.3371	15.5488	15.6684	15.6413	5	4	5	5	2	4	4
>ENSSSCP00000003813	5	1.261	0.00622214	1.1914	0.268465	ECE1	endothelin converting enzyme 1 [Source:HGNC Symbol;Acc:3146]|6|ENSSSCG00000003513|ENSSSCT00000003903	32307.5	32903.8	33627.9	30589	32109.5	40739.8	44445.9	34600.7	44964.4	44552.6	41665.2	34210	38491.2	36127.6	21723	48729.6	41053.6	39222	44091.5	15.006	15.0374	14.9007	14.9707	15.4398	15.0785	15.4565	15.4432	15.3466	15.0621	15.1408	14.4069	15.5725	15.3252	15.2594	15.4282	0	3	0	0	0	0	6
>ENSSSCP00000004552	8	1.14065	0.087896	1.1655	0.0352882	ECHDC1	Uncharacterized protein [Source:UniProtKB/TrEMBL;Acc:F1S2X3]|1|ENSSSCG00000004216|ENSSSCT00000004659	241503	240090	216477	271843	237601	275470	285344	229632	288244	302162	301207	246232	281470	283365	289833	307175	283278	275207	249966	17.8732	17.7239	18.0524	17.8582	18.1223	17.809	18.1369	18.205	18.2004	17.9097	18.1123	18.1449	18.2287	18.1119	18.0702	17.9314	8	8	6	10	5	6	10
>ENSSSCP00000011503	6	0.920027	0.140746	0.923417	0.203457	ECHS1	Sus scrofa enoyl CoA hydratase, short chain, 1, mitochondrial (ECHS1), nuclear gene encoding mitochondrial protein, mRNA. [Source:RefSeq mRNA;Acc:NM_001190175]|14|ENSSSCG00000010790|ENSSSCT00000011806	367639	354338	362750	395967	357501	338238	280748	334573	321561	389963	333669	368912	339484	263674	372068	341942	376329	365768	317124	18.4348	18.4686	18.595	18.4476	18.0989	18.352	18.2947	18.573	18.3481	18.4929	18.0084	18.5052	18.3834	18.5216	18.4806	18.2747	9	10	9	9	6	8	8
>ENSSSCP00000024948	2	1.03685	0.43728	1.19202	0.0122569	ECI1	enoyl-CoA delta isomerase 1 [Source:HGNC Symbol;Acc:2703]|3|ENSSSCG00000024587|ENSSSCT00000026713	58196	65146.8	56029.9	54332.3	57274.9	60340.7	60806.7	59260.5	62111	63495	60837	55534.2	69371	72876.8	63116.1	68043.3	73177.5	63399.9	75612.6	15.9914	15.7739	15.7295	15.8056	15.8919	15.8548	15.9226	15.9544	15.8927	15.7611	16.1532	15.9457	16.0542	16.1591	15.9522	16.2063	1	2	1	1	1	1	2
>ENSSSCP00000001070	6	0.978178	0.754453	0.964125	0.600926	ECI2	enoyl-CoA delta isomerase 2 [Source:HGNC Symbol;Acc:14601]|7|ENSSSCG00000001000|ENSSSCT00000001092	100268	112417	87302.8	98116	103236	98080.1	96780.2	100963	99784.2	104476	84853.5	101623	96671.1	99836.8	107070	92437.4	98723.4	100037	81922.3	16.7785	16.4137	16.5822	16.6556	16.5624	16.6235	16.6065	16.6728	16.3727	16.6329	16.6073	16.7082	16.4962	16.5911	16.6102	16.322	3	3	3	4	3	4	6
>ENSSSCP00000005855	22	1.07855	0.102351	1.10286	0.0230189	ECM29	KIAA0368 [Source:HGNC Symbol;Acc:29020]|1|ENSSSCG00000005459|ENSSSCT00000006004	298184	289823	286002	312217	304695	321606	322361	304912	365815	294003	302745	339800	328856	354047	326128	312125	316435	305504	358895	18.1448	18.1257	18.2522	18.217	18.2983	18.218	18.4808	18.1655	18.2077	18.3743	18.4336	18.3151	18.2518	18.2715	18.2208	18.4532	12	11	5	15	8	5	22
>ENSSSCP00000002082	2	0.854791	0.00558073	0.696422	0.000617977	EDC3	enhancer of mRNA decapping 3 [Source:HGNC Symbol;Acc:26114]|7|ENSSSCG00000001903|ENSSSCT00000002132	23812.7	22426.3	23463.2	25868.1	23493.1	20354.9	19923.3	19999.6	20807.9	20351	18638.1	22409.3	16583.7	16215.2	14943.9	20394.2	17470.3	13592	16886.4	14.4529	14.5181	14.6589	14.52	14.2822	14.2877	14.3448	14.3128	14.186	14.4518	13.9851	13.8673	14.3159	14.0926	13.7305	14.0436	3	2	3	2	1	2	2
>ENSSSCP00000006242	7	1.02172	0.697306	1.02034	0.808973	EDF1	Multiprotein bridging factor 1; Uncharacterized protein [Source:UniProtKB/TrEMBL;Acc:A6N8P5]|1|ENSSSCG00000005833|ENSSSCT00000006411	293439	267973	291023	334908	279852	299812	281909	294735	281995	338192	309162	292881	299408	240450	352395	300504	298172	311293	293633	18.0317	18.1508	18.3534	18.0943	18.1049	18.1691	18.1053	18.3675	18.238	18.16	17.8754	18.4268	18.197	18.1858	18.2479	18.1637	6	6	7	5	5	5	7
>ENSSSCP00000000975	51	0.886901	0.087685	0.914731	0.177829	EEA1	early endosome antigen 1 [Source:HGNC Symbol;Acc:3185]|5|ENSSSCG00000000912|ENSSSCT00000000996	2.02682e+06	2.10509e+06	1.87915e+06	1.8599e+06	2.26314e+06	1.79759e+06	1.65289e+06	1.68001e+06	1.80275e+06	1.84254e+06	2.09969e+06	1.70765e+06	1.854e+06	1.72716e+06	2161315	1.85736e+06	1862431	1.73325e+06	1.78246e+06	21.0055	20.8416	20.8268	21.1099	20.6566	20.68	20.7818	20.8133	21.0017	20.7036	20.72	21.0435	20.8248	20.8288	20.725	20.7654	37	47	42	45	22	33	44
>ENSSSCP00000004843	21	0.960887	0.0259997	0.897799	0.00187708	EEF1A1	Sus scrofa eukaryotic translation elongation factor 1 alpha 1 (EEF1A1), mRNA. [Source:RefSeq mRNA;Acc:NM_001097418]|1|ENSSSCG00000004489|ENSSSCT00000004960	96488796	96176288	96125360	94967016	98686520	92714852	94516808	94802336	90115064	90268984	96269920	90316000	8.66276e+07	84316200	86320024	89569544	82248560	83599520	93711504	26.5192	26.5184	26.5009	26.5563	26.4941	26.4984	26.4253	26.4277	26.5206	26.4285	26.3293	26.3632	26.4165	26.2935	26.317	26.4817	23	27	27	26	26	25	26
>ENSSSCP00000017087	9	0.906498	0.316783	0.827181	0.0875793	EEF1B2	eukaryotic translation elongation factor 1 beta 2 [Source:HGNC Symbol;Acc:3208]|15|ENSSSCG00000016128|ENSSSCT00000017560	4255517	3.45647e+06	4.49793e+06	4895050	4172610	3.85762e+06	3.36133e+06	3.72104e+06	3.65549e+06	4.35172e+06	3836384	4219741	3.52008e+06	2736069	4.01881e+06	3.46321e+06	3484342	4.02296e+06	3.39511e+06	21.7209	22.1008	22.2229	21.9925	21.6806	21.8273	21.8016	22.0532	21.8713	22.0087	21.3837	21.9383	21.7237	21.7325	21.9398	21.695	8	8	9	8	8	8	8
>ENSSSCP00000007416	2	0.82915	0.000528433	0.810765	0.00185693	EEF1D	Uncharacterized protein [Source:UniProtKB/TrEMBL;Acc:F1SEV8]|4|ENSSSCG00000006954|ENSSSCT00000007619	772105	786625	800490	777199	724108	640191	602807	670325	661972	688478	589682	627882	625996	531856	663033	637274	596848	705028	621937	19.5853	19.6105	19.5679	19.4658	19.2013	19.3545	19.3364	19.3931	19.1696	19.2601	19.0207	19.3387	19.2816	19.187	19.4273	19.2464	14	13	14	15	13	13	15
>ENSSSCP00000001101	3	1.10635	0.160815	1.37182	0.00166227	EEF1E1	Sus scrofa eukaryotic translation elongation factor 1 epsilon 1 (EEF1E1), mRNA. [Source:RefSeq mRNA;Acc:NM_001243545]|7|ENSSSCG00000001030|ENSSSCT00000001123	48370.1	53111	46329.8	43843.8	50195.9	53514.4	62869	56434.7	56614.4	46426.2	50719.3	48023	66354.9	75752.4	74716.7	57602.5	58656.5	60145	71256.5	15.6967	15.4997	15.4201	15.6153	15.9401	15.7843	15.7889	15.5027	15.6302	15.5514	16.209	16.1891	15.8138	15.84	15.8762	16.1207	2	2	1	2	3	1	5
>ENSSSCP00000013894	23	0.934633	0.229348	0.931437	0.207709	EEF1G	Elongation factor 1-gamma [Source:UniProtKB/Swiss-Prot;Acc:Q29387]|2|ENSSSCG00000013064|ENSSSCT00000014280	9.40805e+06	10555713	9118025	8682140	9276313	8.79307e+06	8622902	9073251	8631589	7876847	9388149	9165710	8.76301e+06	8935855	9544672	8.18059e+06	8280530	8489513	9146877	23.3315	23.1203	23.0496	23.1451	23.0397	23.1132	23.0412	22.9092	23.1624	23.1278	23.0912	23.1863	22.9638	22.9813	23.0173	23.1248	23	23	23	23	23	20	23
>ENSSSCP00000023888	50	0.887523	0.104925	0.849077	0.0421362	EEF2	eukaryotic translation elongation factor 2 [Source:HGNC Symbol;Acc:3214]|2|ENSSSCG00000025675|ENSSSCT00000031794	48878233	55169984	44751512	44746948	50844488	4.33805e+07	44360488	45917656	42573084	40760880	44343220	42327872	4.15014e+07	41192856	47859396	38960344	38631084	38309544	44055216	25.7174	25.4154	25.4153	25.5996	25.4028	25.4525	25.3434	25.2807	25.4022	25.3351	25.2959	25.5123	25.2155	25.2033	25.1912	25.3928	49	49	48	49	47	45	49
>ENSSSCP00000012382	2	1.02454	0.803718	1.14062	0.207449	EEFSEC	Uncharacterized protein [Source:UniProtKB/TrEMBL;Acc:F1SPF7]|JH118478.1|ENSSSCG00000011619|ENSSSCT00000012716	29248.1	35979.2	26873.6	23891.5	30248.2	29965.8	32827.4	24224.5	33673.3	26971.6	34351.1	27747.1	33361	37111.9	32467.1	34565.7	32146	34052.9	29822.6	15.1349	14.7139	14.5442	14.8846	15.0026	14.5642	15.0393	14.7192	15.0681	14.7601	15.1796	14.9867	15.0771	14.9724	15.0555	14.8641	1	1	0	1	1	1	3
>ENSSSCP00000008961	10	0.967067	0.728013	0.981778	0.859819	EFEMP1	Sus scrofa EGF containing fibulin-like extracellular matrix protein 1 (EFEMP1), mRNA. [Source:RefSeq mRNA;Acc:NM_001244261]|3|ENSSSCG00000008397|ENSSSCT00000009194	182708	172749	215809	191250	151024	176691	157304	138756	206421	206969	199080	151613	179378	157132	194709	178252	219511	169885	156781	17.3983	17.7194	17.5451	17.2044	17.2632	17.0822	17.6552	17.6591	17.603	17.21	17.2616	17.571	17.4436	17.7439	17.3742	17.2584	5	8	9	6	1	4	3
>ENSSSCP00000003753	8	0.778209	0.157637	0.731885	0.0979586	EFHD2	EF-hand domain family, member D2 [Source:HGNC Symbol;Acc:28670]|6|ENSSSCG00000003458|ENSSSCT00000003841	482526	678319	400999	429664	421124	375506	365502	333303	405656	391530	382412	374636	353154	352812	357748	367392	354562	364097	322312	19.3716	18.6132	18.7128	18.6839	18.4795	18.3465	18.6299	18.5788	18.5448	18.5151	18.4285	18.4486	18.487	18.4357	18.474	18.2981	7	9	8	9	6	7	8
>ENSSSCP00000028114	12	0.995696	0.856901	0.958645	0.306658	EFL1	|JH118669.1|ENSSSCG00000024978|ENSSSCT00000029552	173625	181372	174744	167463	170922	172878	204938	184716	173516	165216	159183	149697	166445	187176	165610	162794	150425	150980	181683	17.4686	17.4149	17.3535	17.383	17.6448	17.495	17.4047	17.334	17.2803	17.1917	17.514	17.3374	17.3127	17.1987	17.204	17.4711	7	6	7	9	4	2	12
>ENSSSCP00000010182	2	0.894821	0.0191638	1.07863	0.0705331	EFNB2	ephrin-B2 [Source:HGNC Symbol;Acc:3227]|11|ENSSSCG00000009535|ENSSSCT00000010453	79603.1	77159.8	81626.3	83228.5	76397.6	71230.5	64724.6	74831.5	70859.9	76602.2	75945.9	64418.7	85862.4	82319.4	76469.3	92257.8	88739.1	84526.4	90862.5	16.2356	16.3167	16.3448	16.2212	15.982	16.1914	16.1127	16.2251	16.2127	15.9752	16.3289	16.2226	16.4934	16.4373	16.3671	16.4714	2	2	2	2	2	2	1
>ENSSSCP00000018378	26	0.897679	0.101785	0.808192	0.00969244	EFTUD2	elongation factor Tu GTP binding domain containing 2 [Source:HGNC Symbol;Acc:30858]|12|ENSSSCG00000017346|ENSSSCT00000018882	717831	777561	644485	768279	681000	644382	652151	648108	614764	675019	654472	621775	580146	578039	672720	546467	513634	589082	580931	19.5686	19.2978	19.5513	19.3773	19.3148	19.3059	19.2297	19.3646	19.32	19.246	19.1408	19.3596	19.0598	18.9704	19.1681	19.148	23	26	25	23	11	13	28
>ENSSSCP00000013842	19	0.932678	0.0443476	0.983715	0.568268	EHD1	EH-domain containing 1 [Source:HGNC Symbol;Acc:3242]|2|ENSSSCG00000013017|ENSSSCT00000014228	890610	935117	865809	865868	895648	830652	883282	891224	823246	771076	818393	796693	876107	950854	872208	873658	860631	803776	895512	19.8348	19.7237	19.7238	19.7726	19.7525	19.7654	19.651	19.5565	19.6424	19.6037	19.8589	19.7343	19.7367	19.715	19.6164	19.7724	15	18	15	17	8	10	19
>ENSSSCP00000022001	25	0.936158	0.12189	1.00823	0.794005	EHD2	EH-domain containing 2 [Source:HGNC Symbol;Acc:3243]|6|ENSSSCG00000023371|ENSSSCT00000025210	2.10232e+06	2204156	2.01468e+06	2.03322e+06	2157224	1.9681e+06	2.03653e+06	2.10172e+06	2.10591e+06	1.7246e+06	1.98913e+06	1.85073e+06	2.11963e+06	2.22184e+06	2144471	2.11278e+06	2.16201e+06	1.93222e+06	2144452	21.0718	20.9421	20.9553	21.0407	20.9577	21.0031	21.006	20.7178	20.9237	20.8197	21.0833	21.0322	21.0107	21.0439	20.8818	21.0322	25	26	24	26	20	22	27
>ENSSSCP00000020066	2	1.28647	0.0366087	1.07071	0.650104	EHD3	EH-domain containing 3 [Source:HGNC Symbol;Acc:3244]|JH118557.1|ENSSSCG00000024943|ENSSSCT00000024629	13366.7	13435.8	15205	10624.6	14201.4	17195.9	18241.6	16401.8	14963.3	18756	17971.7	16840.8	14311.9	15760.7	17177.7	10972.7	18358.6	12036.5	11565.2	13.7138	13.8923	13.3751	13.7937	14.1549	14.0016	13.8691	14.1951	14.1334	14.0397	13.944	14.0683	13.4216	14.1642	13.5551	13.4975	10	8	7	10	7	6	12
>ENSSSCP00000005105	2	0.940866	0.510461	0.847476	0.104686	EHD4	|1|ENSSSCG00000004735|ENSSSCT00000005231	142346	159407	131931	119518	158529	133929	145336	144550	134806	118765	137100	123016	120635	130157	128392	112013	117586	109683	125980	17.2824	17.0094	16.8669	17.2744	17.149	17.1412	17.0405	16.8578	17.0649	16.9085	16.9899	16.9702	16.7733	16.8434	16.743	16.9428	2	2	2	2	2	2	2
>ENSSSCP00000012482	15	1.00253	0.918536	1.02166	0.424532	EIF2A	eukaryotic translation initiation factor 2A, 65kDa [Source:HGNC Symbol;Acc:3254]|13|ENSSSCG00000011710|ENSSSCT00000012820	537190	522528	523879	547211	555141	538547	549927	568637	541093	510221	536726	524678	548825	573778	552963	553617	541285	502454	568851	18.9951	18.9989	19.0617	19.0825	19.0689	19.1171	19.0455	18.9608	19.0338	19.0011	19.1301	19.0768	19.0785	19.046	18.9386	19.1177	9	14	10	10	6	5	14
>ENSSSCP00000019731	7	1.28701	0.0074435	0.870313	0.0104418	EIF2AK2	eukaryotic translation initiation factor 2-alpha kinase 2 [Source:HGNC Symbol;Acc:9437]|3|ENSSSCG00000025181|ENSSSCT00000028150	202936	186406	206477	212567	206293	261180	312302	241259	216266	230961	295200	271090	176618	175694	160069	170246	177405	200263	176029	17.5081	17.6556	17.6976	17.6543	18.2526	17.8802	17.7224	17.8173	18.1713	18.0484	17.4227	17.2883	17.3773	17.4367	17.6115	17.4255	5	6	6	6	3	6	8
>ENSSSCP00000010433	2	1.04204	0.490067	1.04955	0.327972	EIF2B1	eukaryotic translation initiation factor 2B, subunit 1 alpha, 26kDa [Source:HGNC Symbol;Acc:3257]|14|ENSSSCG00000009770|ENSSSCT00000010712	21587	20660.9	21689.8	19977.8	24019.6	22494.5	21990.3	25872.6	22001.3	20322.8	24100.2	20680	22656.6	24060	21175	23473.9	22187.9	23523.9	21519.1	14.3346	14.4047	14.2861	14.5519	14.4246	14.6591	14.4253	14.3108	14.5568	14.3359	14.5543	14.3701	14.5188	14.4375	14.5218	14.3933	1	2	2	2	0	1	2
>ENSSSCP00000002576	3	0.868108	0.401139	1.075	0.525175	EIF2B2	eukaryotic translation initiation factor 2B, subunit 2 beta, 39kDa [Source:HGNC Symbol;Acc:3258]|7|ENSSSCG00000002377|ENSSSCT00000002643	33329.5	29008.2	25380.1	33664.3	45265.3	28933.6	22960.9	42033.4	23565.7	19662.2	31633.3	33746.1	35829.1	30389.8	35355	33571.7	36277.7	39680.5	39699.9	14.8242	14.6314	15.0389	15.4661	14.4869	15.3592	14.5244	14.2631	14.9492	15.0424	14.8913	15.1096	15.035	15.1468	15.2761	15.2768	0	3	1	1	1	1	2
>ENSSSCP00000025522	7	0.98464	0.84076	0.998529	0.987513	EIF2B3	eukaryotic translation initiation factor 2B, subunit 3 gamma, 58kDa [Source:HGNC Symbol;Acc:3259]|6|ENSSSCG00000029808|ENSSSCT00000022870	96805.1	111754	86201.5	94501.5	94763.1	95318.2	100250	102798	91712.6	85205.5	97018.4	94924.1	96662.7	94320.8	104447	109711	95918.3	82425.5	93153.9	16.77	16.3954	16.5281	16.532	16.6132	16.6495	16.4848	16.3787	16.566	16.5345	16.5253	16.6724	16.7434	16.5495	16.3308	16.5073	5	5	6	5	2	3	6
>ENSSSCP00000026052	2	1.18747	0.993609	1.22603	0.0793127	EIF2B4	eukaryotic translation initiation factor 2B, subunit 4 delta, 67kDa [Source:HGNC Symbol;Acc:3260]|3|ENSSSCG00000023140|ENSSSCT00000031608	48971.2	53555.8	52836.6	46977	42515.6	58151.8	143877	30276.2	37591.5	67998.4	36731.5	32436.1	60040.2	83361.1	49148.6	54579.8	54657	53435.4	65059.1	15.7088	15.6893	15.5197	15.3757	17.1345	14.8859	15.1981	16.0532	15.1647	14.9853	16.3471	15.5849	15.7361	15.7381	15.7055	15.9895	0	2	0	1	0	0	1
>ENSSSCP00000023652	21	0.911862	0.00609369	0.919513	0.0148449	EIF2S1	eukaryotic translation initiation factor 2, subunit 1 alpha, 35kDa [Source:HGNC Symbol;Acc:3265]|7|ENSSSCG00000027990|ENSSSCT00000030998	1.95452e+06	2.02682e+06	1.97253e+06	1909827	1.9089e+06	1.78225e+06	1.7651e+06	1.74058e+06	1.91845e+06	1673634	1.86163e+06	1.73411e+06	1.7972e+06	1.86336e+06	1.93993e+06	1.84566e+06	1.69057e+06	1.69031e+06	1.7534e+06	20.9508	20.9116	20.865	20.8643	20.7513	20.7311	20.8715	20.6746	20.8281	20.7258	20.8295	20.8876	20.8157	20.6891	20.6889	20.7417	21	21	21	21	20	21	20
>ENSSSCP00000019782	14	0.950842	0.22859	0.978088	0.583261	EIF2S2	Uncharacterized protein [Source:UniProtKB/TrEMBL;Acc:F1S4Y8]|17|ENSSSCG00000026617|ENSSSCT00000029372	875017	942249	861423	812252	884145	832003	893579	820485	838745	771621	858385	809204	855844	940776	869080	842248	804321	824965	853674	19.8457	19.7164	19.6316	19.7539	19.7692	19.6461	19.6779	19.5575	19.7113	19.6261	19.8435	19.7291	19.6839	19.6174	19.654	19.7033	16	18	16	16	16	14	19
>ENSSSCP00000012965	3	0.938723	0.505986	0.973549	0.774493	EIF2S3	Eukaryotic translation initiation factor 2 subunit 3 [Source:UniProtKB/TrEMBL;Acc:F1SPY4]|Y|ENSSSCG00000012178|ENSSSCT00000013322	87583.1	105890	74556	84762.5	85123.5	82216.3	82247.3	89845	81196.6	73526.7	86986.7	79495.7	85266.5	85074.5	96964.1	90462.3	69180.1	70016.6	99901.3	16.6922	16.186	16.3711	16.3773	16.3277	16.4552	16.3091	16.166	16.4085	16.2786	16.3764	16.5652	16.465	16.0781	16.0954	16.6082	3	3	3	3	3	2	2
>ENSSSCP00000011378	58	0.948758	0.120731	0.971144	0.32379	EIF3A	eukaryotic translation initiation factor 3, subunit A [Source:HGNC Symbol;Acc:3271]|14|ENSSSCG00000010679|ENSSSCT00000011680	2.36118e+06	2428495	2.40263e+06	2.20691e+06	2.40669e+06	2.24019e+06	2.32189e+06	2.31292e+06	2275707	2.03594e+06	2.25714e+06	2.23754e+06	2.29304e+06	2.27271e+06	2.31655e+06	2.25287e+06	2.20349e+06	2.2625e+06	2.45014e+06	21.2116	21.1962	21.0736	21.1986	21.1469	21.1413	21.1179	20.9573	21.1061	21.0935	21.116	21.1435	21.1033	21.0714	21.1095	21.2244	47	54	49	48	38	34	58
>ENSSSCP00000000145	19	1.04456	0.175486	1.08606	0.05715	EIF3D	eukaryotic translation initiation factor 3, subunit D [Source:HGNC Symbol;Acc:3278]|5|ENSSSCG00000000141|ENSSSCT00000000147	896997	933754	910139	870108	873985	936963	963243	960643	933021	861965	893514	1.00939e+06	974191	1.06124e+06	987593	877617	900549	1.04619e+06	971950	19.8327	19.7957	19.7308	19.7372	19.8775	19.8736	19.8316	19.7173	19.7691	19.9451	20.0173	19.9136	19.7432	19.7804	19.9967	19.8905	11	14	12	15	10	11	18
>ENSSSCP00000006446	9	0.956957	0.434172	0.99574	0.925337	EIF3E	|4|ENSSSCG00000006033|ENSSSCT00000006622	404585	421638	416838	354384	425479	387170	431143	376534	387417	356299	395214	376414	402861	399105	475034	374299	363318	379225	426185	18.6856	18.6691	18.435	18.6987	18.7178	18.5224	18.5635	18.4427	18.5923	18.522	18.6064	18.8577	18.5138	18.4709	18.5327	18.7011	16	16	13	15	12	11	17
>ENSSSCP00000014524	10	0.931214	0.0205259	0.823236	0.000397106	EIF3G	eukaryotic translation initiation factor 3, subunit G [Source:HGNC Symbol;Acc:3274]|2|ENSSSCG00000013661|ENSSSCT00000014925	1.00939e+06	965445	1.04868e+06	994070	1.02938e+06	939962	898331	965312	938916	957448	948054	931712	830970	808489	825359	828064	863042	839040	821825	19.8808	20.0001	19.923	19.9733	19.7769	19.8806	19.8406	19.8688	19.8546	19.8295	19.6249	19.6547	19.6594	19.7191	19.6784	19.6485	8	11	9	8	6	7	10
>ENSSSCP00000006426	14	0.948874	0.00457203	0.887203	1.2646e-05	EIF3H	eukaryotic translation initiation factor 3, subunit H [Source:HGNC Symbol;Acc:3273]|4|ENSSSCG00000006016|ENSSSCT00000006602	690895	681262	694690	692639	694989	655572	663140	655733	668042	620803	654724	670993	612964	636519	619122	618642	607467	595599	600435	19.3778	19.406	19.4017	19.4066	19.339	19.3227	19.3496	19.2438	19.3205	19.3559	19.2798	19.2399	19.2387	19.2124	19.184	19.1956	12	13	11	13	10	9	14
>ENSSSCP00000003916	17	0.882202	0.228434	0.797898	0.0829655	EIF3I	eukaryotic translation initiation factor 3, subunit I [Source:HGNC Symbol;Acc:3272]|6|ENSSSCG00000003612|ENSSSCT00000004007	871778	745946	840755	1.05286e+06	847550	769084	627607	734676	705436	952172	693173	901442	695590	438591	806296	675963	708374	872612	671706	19.5087	19.6813	20.0059	19.6929	19.2595	19.4867	19.4282	19.8609	19.4029	19.7819	18.7425	19.621	19.3666	19.4342	19.735	19.3575	15	16	17	15	9	10	14
>ENSSSCP00000005055	15	0.951685	0.650402	0.87197	0.214131	EIF3J	eukaryotic translation initiation factor 3, subunit J [Source:HGNC Symbol;Acc:3270]|1|ENSSSCG00000004691|ENSSSCT00000005181	824676	701241	823611	1.02017e+06	753679	784832	895791	699877	749983	731314	933680	698347	719093	741542	676175	733491	719255	674217	769878	19.4196	19.6516	19.9604	19.5236	19.7728	19.4167	19.5165	19.4801	19.8326	19.4136	19.5002	19.367	19.4844	19.4561	19.3629	19.5543	13	15	14	15	9	11	14
>ENSSSCP00000003205	6	0.983248	0.636722	0.979923	0.574166	EIF3K	eukaryotic translation initiation factor 3, subunit K [Source:HGNC Symbol;Acc:24656]|6|ENSSSCG00000002963|ENSSSCT00000003287	86872.7	93117.5	87031.2	82821.6	84520.3	85417.4	88660.8	78703.8	80360.5	91773.9	85341.2	87664.3	85128.6	91535.4	85710.5	88805.2	83035.5	77036	84648.8	16.5068	16.4092	16.3377	16.367	16.436	16.2641	16.2942	16.4858	16.381	16.4197	16.482	16.3872	16.4384	16.3414	16.2332	16.3692	2	3	5	5	1	1	6
>ENSSSCP00000000123	18	1.00847	0.780939	1.03302	0.427251	EIF3L	eukaryotic translation initiation factor 3, subunit L [Source:HGNC Symbol;Acc:18138]|5|ENSSSCG00000000119|ENSSSCT00000000125	1.2244e+06	1.26836e+06	1.23256e+06	1.14214e+06	1.25456e+06	1.23477e+06	1.30375e+06	1.2495e+06	1.26541e+06	1.15207e+06	1.22829e+06	1.20961e+06	1.26483e+06	1.27451e+06	1292533	1227346	1116526	1.29965e+06	1.37841e+06	20.2745	20.2332	20.1233	20.2588	20.3142	20.2529	20.2712	20.1358	20.2282	20.2061	20.2815	20.3018	20.2271	20.0906	20.3097	20.3946	14	17	12	17	11	11	18
>ENSSSCP00000014147	15	0.921287	0.0443074	0.926991	0.0979636	EIF3M	eukaryotic translation initiation factor 3, subunit M [Source:HGNC Symbol;Acc:24460]|2|ENSSSCG00000013315|ENSSSCT00000014541	667165	682160	699017	651981	635500	614650	595103	645071	603166	573553	685280	585726	618456	698084	622275	660718	548098	587880	593680	19.3798	19.415	19.3145	19.2775	19.1828	19.2991	19.2022	19.1296	19.3863	19.1599	19.413	19.2472	19.3337	19.0641	19.1652	19.1793	13	14	14	14	8	11	15
>ENSSSCP00000019023	4	0.814492	0.013219	0.789278	0.00706594	EIF4A1	Sus scrofa eukaryotic translation initiation factor 4A1 (EIF4A1), mRNA. [Source:RefSeq mRNA;Acc:NM_001100196]|12|ENSSSCG00000017957|ENSSSCT00000019541	1e+06	1.03971e+06	869271	1.07003e+06	1.021e+06	814496	808093	783063	830851	903720	750799	810451	789281	848945	910062	705444	684818	780024	806396	19.9878	19.7294	20.0292	19.9616	19.6242	19.5788	19.6642	19.7855	19.5181	19.6284	19.6953	19.7956	19.4282	19.3854	19.5732	19.6211	23	25	24	25	24	23	26
>ENSSSCP00000012574	12	0.964581	0.373656	1.06496	0.207642	EIF4A2	Sus scrofa eukaryotic translation initiation factor 4A2 (EIF4A2), mRNA. [Source:RefSeq mRNA;Acc:NM_001100195]|13|ENSSSCG00000011803|ENSSSCT00000012915	1.07606e+06	1.16992e+06	1.04771e+06	1.00659e+06	1.08001e+06	1.03794e+06	1.05465e+06	1.06792e+06	1.09329e+06	1.00269e+06	1.02294e+06	986171	1.14595e+06	1.09854e+06	1.23409e+06	1.15255e+06	1.02844e+06	1.09934e+06	1.26276e+06	20.158	19.9988	19.941	20.0426	20.0083	20.0264	20.0603	19.9355	19.9643	19.9115	20.0672	20.235	20.1364	19.972	20.0682	20.2681	9	12	11	10	10	9	11
>ENSSSCP00000018178	8	0.968532	0.722976	0.916523	0.409737	EIF4A3	eukaryotic translation initiation factor 4A3 [Source:HGNC Symbol;Acc:18683]|12|ENSSSCG00000017155|ENSSSCT00000018679	244714	287299	209770	227425	254361	237013	286830	242519	187407	220757	241930	242636	224286	253306	281513	208300	145778	233637	223182	18.1322	17.6785	17.795	17.9565	18.1298	17.8877	17.5158	17.7521	17.8842	17.8884	17.9505	18.1028	17.6683	17.1534	17.8339	17.7679	10	10	10	11	7	6	13
>ENSSSCP00000027266	6	1.05274	0.224475	1.0428	0.322749	EIF4E	Uncharacterized protein [Source:UniProtKB/TrEMBL;Acc:F1S0B9]|8|ENSSSCG00000028420|ENSSSCT00000032198	346753	320516	356762	369322	340410	365042	391868	374192	340176	364573	376131	343309	361595	348959	364808	341224	342146	376996	395434	18.29	18.4446	18.4945	18.3769	18.58	18.5134	18.3759	18.4758	18.5209	18.3891	18.4127	18.4768	18.3804	18.3843	18.5242	18.5931	5	6	6	5	5	5	6
>ENSSSCP00000025295	41	0.90393	0.164284	0.826441	0.0280747	EIF4G1	eukaryotic translation initiation factor 4 gamma, 1 [Source:HGNC Symbol;Acc:3296]|13|ENSSSCG00000030255|ENSSSCT00000026490	3.47933e+06	3517131	3215110	3.1808e+06	4.00426e+06	3.14507e+06	3009258	3.13638e+06	3.20822e+06	3.38107e+06	2.88807e+06	3247410	2.87546e+06	3194328	2.78044e+06	2.98744e+06	2.58061e+06	2.78013e+06	2.9298e+06	21.746	21.6164	21.601	21.9331	21.521	21.5807	21.6133	21.689	21.4617	21.6309	21.6071	21.4069	21.5105	21.2993	21.4067	21.4824	36	41	38	41	30	30	39
>ENSSSCP00000014250	25	0.884089	0.0501888	0.954371	0.356424	EIF4G2	eukaryotic translation initiation factor 4 gamma, 2 [Source:HGNC Symbol;Acc:3297]|2|ENSSSCG00000013405|ENSSSCT00000014645	817849	846883	768126	759125	897263	723051	734787	735399	735339	694792	746544	691449	780532	833618	759311	771139	785328	746787	787005	19.6918	19.551	19.534	19.7752	19.487	19.4882	19.488	19.4062	19.5099	19.3993	19.669	19.5343	19.5566	19.5829	19.5103	19.586	20	21	21	19	12	16	22
>ENSSSCP00000003812	10	0.966341	0.614509	0.940417	0.365419	EIF4G3	Uncharacterized protein [Source:UniProtKB/TrEMBL;Acc:F1SU05]|6|ENSSSCG00000003512|ENSSSCT00000003902	119354	137209	107838	111716	120653	115337	112433	117244	114401	116259	115051	116632	112243	113384	111751	119988	110266	106225	111842	17.066	16.7185	16.7695	16.8805	16.7787	16.8392	16.8037	16.827	16.8119	16.8316	16.7909	16.7699	16.8725	16.7506	16.6968	16.7711	9	13	10	10	5	7	14
>ENSSSCP00000024485	10	0.912445	0.271092	0.665823	0.00512578	EIF4H	Sus scrofa heterogeneous nuclear ribonucleoprotein C (C1/C2) (HNRNPC), transcript variant 1, mRNA. [Source:RefSeq mRNA;Acc:NM_001243693]|GL894341.1|ENSSSCG00000028640|ENSSSCT00000023644	2.34921e+06	2.41698e+06	2.11636e+06	2706219	2.15727e+06	2.14352e+06	2.17169e+06	1.98351e+06	1.74787e+06	2416815	2.51771e+06	2.02355e+06	1.56416e+06	1.83808e+06	2.08651e+06	1.36898e+06	1.08577e+06	1.49099e+06	1.51462e+06	21.2048	21.0132	21.3678	21.0408	21.0504	20.9196	20.7372	21.2047	21.2637	20.9485	20.8098	20.9927	20.3847	20.0503	20.5078	20.5305	13	10	11	12	10	11	11
>ENSSSCP00000024896	2	0.901581	0.0936694	0.854193	0.0255978	EIF5	eukaryotic translation initiation factor 5 [Source:HGNC Symbol;Acc:3299]|GL894184.2|ENSSSCG00000027421|ENSSSCT00000029757	64812.3	72189.5	63396.5	58695.8	64967.2	58433.5	64922.3	58271.2	59044.8	57026.9	58225.5	53110.3	55362.2	56620.9	54485.8	58737.8	51695.6	52366.3	58266.6	16.1395	15.9521	15.841	15.9874	15.9864	15.8305	15.8495	15.7994	15.8294	15.6967	15.789	15.7336	15.842	15.6578	15.6764	15.8304	1	2	2	2	1	1	2
>ENSSSCP00000019005	11	0.911505	0.265624	0.809351	0.0495672	EIF5A	|3|ENSSSCG00000017939|ENSSSCT00000019523	12911123	11958086	11888338	15253611	12544457	1.17686e+07	9902936	10943834	10947688	13890332	12049184	12877378	10449624	7730811	12998319	10654716	10723339	11530244	9060315	23.5115	23.503	23.8626	23.5805	23.2394	23.3836	23.3841	23.7276	23.5224	23.6183	22.8822	23.6318	23.345	23.3543	23.4589	23.1111	11	11	11	11	10	11	11
>ENSSSCP00000020345	8	0.916521	0.257132	0.82256	0.069243	EIF6	eukaryotic translation initiation factor 6 [Source:HGNC Symbol;Acc:6159]|GL892260.2|ENSSSCG00000022864|ENSSSCT00000023513	1.20459e+06	1.12598e+06	1.13395e+06	1.37663e+06	1.18182e+06	1.10404e+06	947443	973996	1.01981e+06	1.30553e+06	1.05269e+06	1.32476e+06	990851	719397	1.33414e+06	949129	952823	1.1294e+06	860223	20.1027	20.1129	20.3927	20.1726	19.8537	19.8936	19.9599	20.3162	20.0056	20.3373	19.4564	20.3475	19.8562	19.8618	20.1071	19.7144	7	8	8	8	6	7	8
>ENSSSCP00000023668	5	0.973227	0.451558	0.900461	0.015518	EIPR1	tumor suppressing subtransferable candidate 1 [Source:HGNC Symbol;Acc:12383]|3|ENSSSCG00000028755|ENSSSCT00000030705	75345.7	72174.3	73445.8	77129.3	78633.3	73328.5	68416.1	65786.7	75023.2	80766.6	74520.4	75457.7	67845.9	61605.5	68305.7	70239.4	73281.6	70697.6	62945.5	16.1392	16.1644	16.235	16.2629	16.062	16.0055	16.195	16.3015	16.1853	16.2034	15.9108	16.0597	16.1	16.1612	16.1094	15.9418	2	5	4	3	1	1	4
>ENSSSCP00000020832	6	0.822484	0.334137	0.836767	0.369879	ELAC2	elaC ribonuclease Z 2 [Source:HGNC Symbol;Acc:14198]|12|ENSSSCG00000028465|ENSSSCT00000023879	59320.2	88077.9	49691.1	47992.8	51519.1	48789.9	57063	55247.2	39576.7	42312.5	49358.6	49181.3	49637.2	44532.4	48431.2	41373.9	72932.1	45948.8	44604.8	16.4265	15.6007	15.5505	15.6528	15.8003	15.7536	15.2724	15.3688	15.591	15.5858	15.4426	15.5636	15.3364	16.1543	15.4877	15.4449	3	5	4	4	0	0	4
>ENSSSCP00000014443	13	0.973271	0.368439	0.892104	0.000195328	ELAVL1	Sus scrofa ELAV (embryonic lethal, abnormal vision, Drosophila)-like 1 (Hu antigen R) (ELAVL1), mRNA. [Source:RefSeq mRNA;Acc:NM_001195334]|2|ENSSSCG00000013592|ENSSSCT00000014844	1.23456e+06	1.20314e+06	1.23047e+06	1.26336e+06	1.24129e+06	1.20157e+06	1.20236e+06	1.32238e+06	1.15563e+06	1.25279e+06	1.19485e+06	1.08138e+06	1.10136e+06	1.09677e+06	1.1027e+06	1.12148e+06	1.03012e+06	1140650	1.11644e+06	20.1984	20.2308	20.2688	20.2434	20.1974	20.3347	20.1403	20.2567	20.1884	20.0444	20.0648	20.0726	20.097	19.9744	20.1214	20.0905	12	14	13	14	10	11	14
>ENSSSCP00000027586	5	1.04736	0.56181	1.05656	0.574445	ELMO2	engulfment and cell motility 2 [Source:HGNC Symbol;Acc:17233]|17|ENSSSCG00000023306|ENSSSCT00000023621	69350.3	74045.6	65363.7	63436.8	74555	72634.8	64652.2	84973.4	60225.9	69993.9	74189	81774.5	73272.5	80516.4	58207.6	59863.8	74823.9	79969	86254.6	16.1761	15.9962	15.953	16.186	15.9804	16.3747	15.8781	16.0949	16.1789	16.3194	16.297	15.8289	15.8694	16.1912	16.2872	16.3963	2	3	3	3	0	2	5
>ENSSSCP00000022640	2	0.950408	0.430054	0.888386	0.0875903	EMC10	ER membrane protein complex subunit 10 [Source:HGNC Symbol;Acc:27609]|6|ENSSSCG00000024391|ENSSSCT00000028973	34345.8	37803.9	36107.6	32954.9	30516.8	32642.5	30399.2	29779.8	33259.9	33855.7	37917.8	30642.6	30512.3	32128.3	31514.5	29138.4	29587.2	31780.4	28925.2	15.2062	15.14	15.0082	14.8973	14.8917	14.862	15.0215	15.0471	15.2106	14.9033	14.9716	14.9437	14.8306	14.8527	14.9558	14.82	1	2	1	1	0	0	3
>ENSSSCP00000006445	7	1.07177	0.496123	1.14027	0.361071	EMC2	ER membrane protein complex subunit 2 [Source:HGNC Symbol;Acc:28963]|4|ENSSSCG00000006032|ENSSSCT00000006621	188843	235193	160487	169345	190348	202396	189058	185484	253262	177540	193955	215078	215333	258738	262688	162926	187260	168072	252314	17.8435	17.2921	17.3696	17.5383	17.5285	17.5009	17.9503	17.4378	17.5654	17.7145	17.9811	18.003	17.3139	17.5147	17.3587	17.9449	4	4	3	3	2	3	7
>ENSSSCP00000012322	3	0.968167	0.789669	1.03856	0.657777	EMC3	ER membrane protein complex subunit 3 [Source:HGNC Symbol;Acc:23999]|13|ENSSSCG00000011562|ENSSSCT00000012654	46079.9	56564.2	38091.8	38508.9	51154.8	44613	56185	48305.3	47252.2	28862.8	47580.9	39492	47856.7	45926.4	51102.7	50574.9	43626.1	44386.2	51523.6	15.7876	15.2172	15.2329	15.6426	15.7779	15.5599	15.5281	14.8169	15.5381	15.2693	15.487	15.6411	15.6261	15.4129	15.4378	15.6529	1	3	2	1	1	0	2
>ENSSSCP00000023707	2	1.15705	0.122467	1.25381	0.0166044	EMC4	ER membrane protein complex subunit 4 [Source:HGNC Symbol;Acc:28032]|7|ENSSSCG00000026925|ENSSSCT00000029279	31997.2	34300.3	29798.6	28837.9	35052	37022.4	35970.2	43569.7	42657.2	28201	35363.4	36373.1	40118.4	44414.4	40417.1	34260.2	46840.3	40963.2	33815	15.0659	14.863	14.8157	15.0972	15.1345	15.411	15.3805	14.7835	15.11	15.1506	15.4387	15.3027	15.0642	15.5155	15.322	15.0454	1	1	1	2	1	1	1
>ENSSSCP00000026741	2	1.09226	0.11254	1.20024	0.00365432	EMC7	Uncharacterized protein [Source:UniProtKB/TrEMBL;Acc:I3LRK6]|GL894821.2|ENSSSCG00000027650|ENSSSCT00000025479	20848.9	20952.7	22206.1	19142.6	21094.2	22772.4	26422.4	23314	23508	20605.1	21302.9	21481.7	25023.6	25281.6	27794.4	24488.9	24452.1	25997.7	22126.9	14.3549	14.4387	14.2245	14.3646	14.6895	14.5089	14.5209	14.3307	14.3788	14.3908	14.6258	14.7625	14.5798	14.5777	14.6661	14.4335	1	2	1	1	1	1	2
>ENSSSCP00000021763	3	0.96926	0.88447	0.927239	0.613511	EMC8	ER membrane protein complex subunit 8 [Source:HGNC Symbol;Acc:7864]|6|ENSSSCG00000029403|ENSSSCT00000026569	38388.7	30611.6	34689.2	52516.7	35737.3	37208.6	32623.1	32525.3	33492.9	46297.5	34674.9	43638.1	35595.5	26959	48848.6	35433.1	30166.2	45847.2	26318.9	14.9018	15.0822	15.6805	15.1251	14.9936	14.9893	15.0316	15.4986	15.0816	15.4133	14.7185	15.576	15.1128	14.8806	15.4845	14.6838	1	4	2	2	0	1	2
>ENSSSCP00000013891	6	0.932901	0.858131	0.904091	0.66043	EML3	echinoderm microtubule associated protein like 3 [Source:HGNC Symbol;Acc:26666]|2|ENSSSCG00000013061|ENSSSCT00000014277	33341.2	51192.1	28178.8	28014.8	25979.3	31104.1	31395.3	35086.8	28450.8	32043.7	29187	30461	30143.5	22197.8	45575.3	31684.6	26406.3	26680.1	28317.2	15.6436	14.7823	14.7739	14.6651	14.9383	15.0986	14.7962	14.9678	14.833	14.8947	14.4381	15.476	14.9515	14.6886	14.7035	14.7894	2	3	2	1	1	1	4
>ENSSSCP00000009035	14	0.995004	0.956421	0.957587	0.533817	EML4	echinoderm microtubule associated protein like 4 [Source:HGNC Symbol;Acc:1316]|3|ENSSSCG00000008467|ENSSSCT00000009269	358561	390313	314535	339023	390372	356769	312856	362576	405174	363371	349976	346663	343353	384762	353306	340146	325541	307426	348937	18.5743	18.2629	18.371	18.5745	18.2551	18.4679	18.6282	18.4711	18.4169	18.4032	18.5536	18.4306	18.3758	18.3125	18.2299	18.4126	10	10	5	7	3	4	13
>ENSSSCP00000027560	2	1.1491	0.440194	1.32823	0.0422647	EML6	Uncharacterized protein [Source:UniProtKB/TrEMBL;Acc:I3LTW1]|GL896302.1|ENSSSCG00000025887|ENSSSCT00000026242	19943.8	18199	24100.4	16154.6	21321.3	22917.5	19907.4	18387.8	23966.5	35696.8	23475.3	16071.3	26489.9	21409	21185.2	28919	32044.9	26407.9	28973.3	14.1516	14.5568	13.9797	14.38	14.281	14.1665	14.5487	15.1235	14.5189	13.9722	14.3859	14.3708	14.8197	14.9678	14.6887	14.8224	1	2	1	2	0	0	1
>ENSSSCP00000011569	12	0.949428	0.246188	1.07036	0.483724	ENAH	enabled homolog (Drosophila) [Source:HGNC Symbol;Acc:18271]|10|ENSSSCG00000010850|ENSSSCT00000011872	636610	616470	691581	614177	624213	604416	525541	655164	597980	641842	609923	596044	681401	580974	681823	579332	663395	926998	655882	19.2337	19.3995	19.2283	19.2517	19.0034	19.3215	19.1897	19.2919	19.2183	19.1851	19.1481	19.379	19.144	19.3395	19.8222	19.3231	10	12	10	11	6	7	13
>ENSSSCP00000014964	4	0.738615	0.0593862	0.729761	0.0771711	ENC1	ectodermal-neural cortex 1 (with BTB domain) [Source:HGNC Symbol;Acc:3345]|2|ENSSSCG00000014072|ENSSSCT00000015372	41210.3	30191.3	43270.4	41966.4	49413.2	30438.6	36359.5	31080.3	27821.1	25690.7	32094.7	29585.1	30073.7	18959.4	48096.6	30506.5	31629.5	29932	21318	14.8818	15.4011	15.3569	15.5926	15.15	14.9237	14.7639	14.649	14.97	14.8526	14.2106	15.5536	14.8968	14.949	14.8694	14.3798	2	3	2	3	2	0	3
>ENSSSCP00000015889	13	0.953703	0.416244	1.18466	0.0257401	ENDOD1	endonuclease domain containing 1 [Source:HGNC Symbol;Acc:29129]|9|ENSSSCG00000014965|ENSSSCT00000016326	589259	666306	565218	572616	552894	561978	586323	534467	537289	497270	585437	631078	698069	808695	747794	657889	631976	618377	723681	19.3458	19.1084	19.1272	19.0766	19.1613	19.0277	19.0353	18.9237	19.1592	19.2675	19.6252	19.5123	19.3275	19.2695	19.2381	19.465	11	11	11	8	6	6	11
>ENSSSCP00000024473	15	0.981662	0.669674	1.1268	0.0532796	ENO1	enolase 1, (alpha) [Source:HGNC Symbol;Acc:3350]|6|ENSSSCG00000022343|ENSSSCT00000026917	209362572	198383936	208667840	227778448	202620064	205523376	199618720	188808160	218455392	224264480	215983040	186010464	235910760	197236448	240665600	249563040	264237152	240334176	223428144	27.5637	27.6366	27.7631	27.5942	27.5727	27.4923	27.7028	27.7406	27.6863	27.4708	27.5554	27.8425	27.8948	27.9773	27.8405	27.7352	13	16	13	14	11	12	14
>ENSSSCP00000021806	12	0.958793	0.602731	1.08472	0.341754	ENO2	enolase 2 (gamma, neuronal) [Source:HGNC Symbol;Acc:3353]|5|ENSSSCG00000028373|ENSSSCT00000025086	6.59259e+06	5557247	7462565	6.78568e+06	6564862	6.32093e+06	5626708	5.54122e+06	6776775	6982133	6677747	6320980	7.1511e+06	6071921	8197271	6350003	7862126	7.56428e+06	6860996	22.4059	22.8312	22.6941	22.6463	22.4239	22.4018	22.6922	22.7352	22.6709	22.5917	22.5337	22.9667	22.5983	22.9065	22.8508	22.71	9	11	11	10	4	6	11
>ENSSSCP00000018966	4	1.16339	0.0409724	1.41325	0.0029997	ENO3	enolase 3 (beta, muscle) [Source:HGNC Symbol;Acc:3354]|12|ENSSSCG00000017904|ENSSSCT00000019484	2.77947e+07	25525300	31252896	26815104	27585590	3.23361e+07	30114646	31197928	28656710	33700328	38613876	31733144	3.9281e+07	29993366	48457208	38097528	39939704	35990608	43207732	24.6054	24.8975	24.6765	24.7174	24.844	24.8949	24.7724	25.0063	25.2026	24.9195	24.8381	25.5302	25.1832	25.2513	25.1011	25.3648	10	11	10	11	10	10	11
>ENSSSCP00000009860	6	0.9579	0.441534	1.01589	0.790677	ENOPH1	enolase-phosphatase 1 [Source:HGNC Symbol;Acc:24599]|8|ENSSSCG00000009246|ENSSSCT00000010126	342460	317903	387423	339793	324724	328043	340510	327271	320674	345837	306458	327507	347901	291746	360702	345167	360671	367064	362058	18.2782	18.5635	18.3743	18.3089	18.3773	18.3201	18.2907	18.3997	18.2253	18.3212	18.1544	18.4604	18.3969	18.4603	18.4857	18.4659	6	6	6	6	6	6	6
>ENSSSCP00000021666	4	0.976317	0.745996	1.36121	0.22312	ENOSF1	enolase superfamily member 1 [Source:HGNC Symbol;Acc:30365]|GL896245.1|ENSSSCG00000027169|ENSSSCT00000026139	29747.6	57922.4	19549.9	17297	24220.9	29043	32014.1	27151	30172.2	32072.5	25564	27284.4	40492.8	43396.5	49424.3	40242.1	45549.6	30017.1	34327.4	15.8218	14.2549	14.0782	14.564	14.9664	14.7287	14.8809	14.9691	14.6418	14.7358	15.4053	15.5929	15.2964	15.4751	14.8735	15.0671	0	0	1	0	1	0	0
>ENSSSCP00000001870	2	1.31146	0.041616	1.22158	0.100537	ENPP5	ectonucleotide pyrophosphatase/phosphodiesterase 5 (putative) [Source:HGNC Symbol;Acc:13717]|7|ENSSSCG00000001715|ENSSSCT00000001917	20990.2	17389.1	18487.2	25125.9	22958.8	27527.9	28486.8	27681.2	28683.4	30071	26394	23851.1	25641.2	24527.1	32733.6	25404	25117.8	23732.4	22332.4	14.0859	14.1742	14.6169	14.4868	14.798	14.7566	14.8079	14.8761	14.6879	14.5418	14.5821	14.9985	14.6328	14.6164	14.5346	14.4468	1	1	2	1	0	1	3
>ENSSSCP00000007095	2	1.06847	0.496707	1.07211	0.691342	ENSA	endosulfine alpha [Source:HGNC Symbol;Acc:3360]|4|ENSSSCG00000006653|ENSSSCT00000007290	76808.7	76056.8	68737.2	84130	78310.7	82067.7	72281.2	66335.8	73816.2	102120	83442	94411.4	82347.3	59580.6	117344	65108.6	84465.7	93950.6	73634.3	16.2148	16.0688	16.3603	16.2569	16.1413	16.0175	16.1716	16.6399	16.3485	16.5267	15.8626	16.8404	15.9906	16.3661	16.5196	16.1681	2	3	2	2	1	2	2
>ENSSSCP00000003890	3	1.09	0.43459	1.09317	0.348718	EPB41	erythrocyte membrane protein band 4.1 (elliptocytosis 1, RH-linked) [Source:HGNC Symbol;Acc:3377]|6|ENSSSCG00000003586|ENSSSCT00000003981	34213	42622.9	28338	32301	33590	37292.3	33444.8	47328.8	41536.8	35059.3	33703.7	32680.4	37400.6	39385	33167.2	41754	36402.8	38581.9	35113	15.3793	14.7905	14.9793	15.0357	15.0295	15.5304	15.3421	15.0975	15.0406	14.9961	15.2654	15.0175	15.3496	15.1518	15.2356	15.0997	1	2	2	1	0	1	3
>ENSSSCP00000004533	22	1.00714	0.7664	0.981045	0.477833	EPB41L2	Uncharacterized protein [Source:UniProtKB/TrEMBL;Acc:F1S3M9]|1|ENSSSCG00000004199|ENSSSCT00000004640	4935028	5.14233e+06	4933915	4.64201e+06	5021857	4.97027e+06	5022300	5011339	4769964	4.90035e+06	5012156	5.10553e+06	4.84149e+06	4963501	4674873	4.82188e+06	4.83248e+06	4985073	4.77112e+06	22.294	22.2343	22.1463	22.2598	22.2599	22.2568	22.1855	22.2245	22.257	22.2836	22.2429	22.1565	22.2012	22.2043	22.2492	22.1859	41	41	41	41	35	35	41
>ENSSSCP00000003993	10	0.910412	0.0858326	0.859687	0.0253163	EPB41L3	erythrocyte membrane protein band 4.1-like 3 [Source:HGNC Symbol;Acc:3380]|6|ENSSSCG00000003687|ENSSSCT00000004085	293938	318732	304769	272238	280013	267605	286666	293529	252524	250628	255049	267233	252695	204341	258682	266527	258524	261546	266549	18.282	18.2174	18.0545	18.0951	18.129	18.1631	17.9461	17.9352	17.9604	18.0277	17.6406	17.9808	18.0239	17.9799	17.9967	18.024	9	10	8	9	7	8	9
>ENSSSCP00000003769	20	1.04841	0.462385	0.990729	0.848536	EPHA2	EPH receptor A2 [Source:HGNC Symbol;Acc:3386]|6|ENSSSCG00000003471|ENSSSCT00000003857	575970	618229	537236	543323	605093	603852	575809	636043	722689	525738	581256	581579	570630	578099	593187	531748	553955	566176	600617	19.2378	19.0352	19.0514	19.2068	19.1352	19.2788	19.463	19.004	19.1488	19.1496	19.141	19.1781	19.0204	19.0794	19.1109	19.1961	17	17	15	16	12	12	21
>ENSSSCP00000003828	9	1.13045	0.00615791	1.27694	0.00012825	EPHB2	EPH receptor B2 [Source:HGNC Symbol;Acc:3393]|6|ENSSSCG00000003527|ENSSSCT00000003918	142673	152005	143134	139879	135674	161284	153611	155861	165780	161983	172788	157682	182185	188898	177066	185167	195317	165419	181242	17.2138	17.127	17.0938	17.0498	17.2289	17.2499	17.3389	17.3055	17.3986	17.2667	17.5273	17.4339	17.4985	17.5755	17.3358	17.4676	10	9	9	9	5	5	11
>ENSSSCP00000011571	16	1.18098	0.0162845	1.44408	0.000980588	EPHX1	Sus scrofa epoxide hydrolase 1, microsomal (xenobiotic) (EPHX1), mRNA. [Source:RefSeq mRNA;Acc:NM_214355]|10|ENSSSCG00000010853|ENSSSCT00000011875	2.6605e+06	2.93539e+06	2.55851e+06	2.42684e+06	2.72125e+06	3.14199e+06	3.01224e+06	3.15391e+06	3.44821e+06	2928883	3.32061e+06	2.98808e+06	3.84196e+06	4.06485e+06	3.64453e+06	3.99419e+06	3.89845e+06	3742892	3.70686e+06	21.4851	21.2869	21.2106	21.3758	21.5224	21.5887	21.7174	21.4819	21.663	21.5108	21.9548	21.7973	21.9295	21.8945	21.8357	21.8218	14	15	14	15	14	15	16
>ENSSSCP00000010323	2	1.23885	0.193829	1.32146	0.145461	EPHX2	epoxide hydrolase 2, cytoplasmic [Source:HGNC Symbol;Acc:3402]|14|ENSSSCG00000009666|ENSSSCT00000010599	15179.5	10340.4	17804.3	14766.6	17806.5	18805.1	20897.5	14016.8	23916.9	19652	16649.1	17698.3	20059.1	21067.8	13294.2	26606.6	23578.3	20317	15490.5	13.336	14.1199	13.8501	14.1201	14.351	13.7749	14.5457	14.2624	14.0232	14.1113	14.3628	13.6985	14.6995	14.5252	14.3104	13.9191	0	1	1	1	0	1	2
>ENSSSCP00000011535	55	0.938268	0.167998	0.943623	0.196637	EPRS	glutamyl-prolyl-tRNA synthetase [Source:HGNC Symbol;Acc:3418]|10|ENSSSCG00000010821|ENSSSCT00000011838	4.22948e+06	4449146	4162951	3.85872e+06	4447099	3.96838e+06	4.05988e+06	4188786	4.00812e+06	3.63137e+06	3942061	3980092	3.99103e+06	4.18254e+06	4061554	3.84245e+06	3.88338e+06	3837651	4.13863e+06	22.0851	21.9892	21.8797	22.0844	21.953	21.9981	21.9345	21.7921	21.9105	21.9244	21.9959	21.9536	21.8736	21.8889	21.8718	21.9807	48	53	49	52	43	42	54
>ENSSSCP00000004185	14	0.83427	0.0603982	0.822911	0.04524	EPS15	epidermal growth factor receptor pathway substrate 15 [Source:HGNC Symbol;Acc:3419]|6|ENSSSCG00000003872|ENSSSCT00000004284	502387	599978	457294	486973	465303	419126	405724	453709	436507	419339	409920	389559	413420	402980	463272	385632	371048	411629	445959	19.1946	18.8028	18.8935	18.8278	18.6301	18.7914	18.7356	18.6778	18.645	18.5715	18.6203	18.8215	18.5569	18.5012	18.651	18.7666	9	12	11	12	7	7	11
>ENSSSCP00000014731	12	0.933362	0.018637	0.97596	0.455832	EPS15L1	epidermal growth factor receptor pathway substrate 15-like 1 [Source:HGNC Symbol;Acc:24634]|2|ENSSSCG00000013857|ENSSSCT00000015136	128376	127525	130422	123592	131963	119821	115338	116010	120493	126580	114267	126239	125289	116357	141080	126960	119010	118268	130061	16.9604	16.9928	16.9152	17.0098	16.8155	16.8239	16.8786	16.9497	16.802	16.9458	16.8282	17.1062	16.954	16.8607	16.8517	16.9888	8	11	10	10	6	4	11
>ENSSSCP00000000803	9	0.947761	0.374839	0.863229	0.0248062	ERC1	Uncharacterized protein [Source:UniProtKB/TrEMBL;Acc:F1SHS4]|5|ENSSSCG00000000755|ENSSSCT00000000819	160282	157654	174901	145350	163222	151909	134925	184261	158948	136504	145738	151077	138360	137370	136312	144948	135538	131539	144452	17.2664	17.4162	17.1492	17.3165	17.0418	17.4914	17.2782	17.0586	17.153	17.2049	17.0677	17.0566	17.1452	17.0483	17.0051	17.1402	4	9	9	10	3	6	9
>ENSSSCP00000017998	9	0.903982	0.159433	0.942295	0.350831	ERGIC1	endoplasmic reticulum-golgi intermediate compartment (ERGIC) 1 [Source:HGNC Symbol;Acc:29205]|16|ENSSSCG00000016988|ENSSSCT00000018498	236300	265004	210899	224561	244736	213611	201782	220679	246535	187098	222343	203230	222665	230268	240135	217052	210997	214844	222691	18.0157	17.6862	17.7768	17.9009	17.6224	17.7516	17.9114	17.5134	17.7624	17.6328	17.813	17.8735	17.7277	17.6869	17.7129	17.7647	5	8	6	6	4	4	7
>ENSSSCP00000002505	2	1.13928	0.666739	0.924176	0.698851	ERH	Sus scrofa enhancer of rudimentary homolog (Drosophila) (ERH), mRNA. [Source:RefSeq mRNA;Acc:NM_001185163]|7|ENSSSCG00000002307|ENSSSCT00000002569	161643	111545	121623	299774	113632	184157	98503.2	198380	93582.7	255276	168250	290952	149387	42694.1	295636	133805	128204	199409	96573.7	16.7673	16.8921	18.1935	16.794	16.5879	17.5979	16.514	17.9617	17.3602	18.1504	15.3817	18.1735	17.0298	16.9681	17.6054	16.5593	2	2	3	2	2	2	2
>ENSSSCP00000008980	5	1.06557	0.272785	1.44037	0.130709	ERLEC1	endoplasmic reticulum lectin 1 [Source:HGNC Symbol;Acc:25222]|3|ENSSSCG00000008414|ENSSSCT00000009214	37452.2	37486.2	37484.8	35863.7	38973.9	39908	36028.6	38117.1	36690.4	47889.4	43174.6	37548	53945.1	109638	38821.4	47820.8	43958.3	42005.4	41426.5	15.1941	15.194	15.1302	15.2502	15.1369	15.2182	15.1631	15.5474	15.3979	15.1964	16.7424	15.2446	15.5454	15.4238	15.3583	15.3383	2	3	3	1	0	0	4
>ENSSSCP00000011237	2	1.14332	0.0691365	1.18092	0.0465222	ERLIN1	Sus scrofa ER lipid raft associated 1 (ERLIN1), mRNA. [Source:RefSeq mRNA;Acc:NM_001142896]|14|ENSSSCG00000010547|ENSSSCT00000011538	27509.3	23878	29320.6	27974.3	28864.4	31451.8	34828.7	27018	32875	28620.9	33197.8	32170.7	32486.2	37417.1	27174	29255.8	31073.5	35474	34522.8	14.5434	14.8396	14.7718	14.817	15.088	14.7216	15.0047	14.8048	15.0188	14.9735	15.1914	14.7299	14.8364	14.9234	15.1145	15.0753	1	2	2	1	1	1	2
>ENSSSCP00000016773	6	1.15223	0.0220723	1.17403	0.0112199	ERLIN2	ER lipid raft associated 2 [Source:HGNC Symbol;Acc:1356]|15|ENSSSCG00000015827|ENSSSCT00000017235	120715	126824	125119	122293	108624	139092	156203	144862	137013	125961	142764	127749	141723	143545	147561	150700	134762	139051	134717	16.9525	16.9329	16.9	16.729	17.2531	17.1443	17.064	16.9426	17.1233	16.9629	17.1311	17.171	17.2013	17.0401	17.0853	17.0396	8	8	7	7	7	3	10
>ENSSSCP00000005597	8	1.50711	0.462419	1.20941	0.626062	ERMP1	endoplasmic reticulum metallopeptidase 1 [Source:HGNC Symbol;Acc:23703]|1|ENSSSCG00000005207|ENSSSCT00000005739	119406	54717.2	54707.8	309420	58780.1	179958	55182.5	55780	66854.1	329059	282076	290798	144411	73592.8	301129	66712.7	67430.9	286782	70817.1	15.7397	15.7395	18.2392	15.843	15.7519	15.7675	16.0287	18.328	18.1057	18.1497	16.1673	18.2	16.0257	16.0411	18.1296	16.1118	5	4	4	4	2	2	6
>ENSSSCP00000005415	5	1.01608	0.739137	1.05263	0.551422	ERO1A	Sus scrofa ERO1-like (S. cerevisiae) (ERO1L), mRNA. [Source:RefSeq mRNA;Acc:NM_001137627]|1|ENSSSCG00000005037|ENSSSCT00000005553	77487.6	86778.4	75056.7	70338.5	77776.7	78733.6	83825.4	78661.1	80048.8	73889	73211.8	82765.8	81565.7	102738	74386.6	67769.4	80317.6	77397.3	86785.1	16.405	16.1957	16.102	16.2471	16.3551	16.2634	16.2886	16.1731	16.1598	16.3367	16.6486	16.1828	16.0483	16.2934	16.24	16.4052	3	3	3	2	0	2	4
>ENSSSCP00000010555	11	0.936985	0.447196	0.970282	0.726618	ERP29	endoplasmic reticulum protein 29 [Source:HGNC Symbol;Acc:13799]|14|ENSSSCG00000009888|ENSSSCT00000010838	1.47531e+06	1301960	1.43252e+06	1.75942e+06	1.40735e+06	1.38235e+06	1.17924e+06	1.28504e+06	1.36193e+06	1.62003e+06	1.39471e+06	1.45313e+06	1.43147e+06	1.15621e+06	1.55968e+06	1.51684e+06	1530992	1510686	1.31441e+06	20.3123	20.4501	20.7467	20.4245	20.1694	20.2934	20.3772	20.6276	20.4115	20.4707	20.141	20.5728	20.5326	20.546	20.5268	20.326	10	9	9	10	9	9	9
>ENSSSCP00000005783	12	0.914744	0.283396	0.905936	0.243387	ERP44	endoplasmic reticulum protein 44 [Source:HGNC Symbol;Acc:18311]|1|ENSSSCG00000005387|ENSSSCT00000005930	782435	781132	812559	883376	652671	715728	693796	741298	732612	731266	689394	705999	708835	628160	708142	779348	696038	738205	703118	19.5752	19.6321	19.7527	19.316	19.4042	19.4997	19.4827	19.48	19.395	19.4293	19.2608	19.4337	19.5719	19.4088	19.4937	19.4234	9	11	10	11	6	8	11
>ENSSSCP00000010038	11	0.987536	0.711238	1.00491	0.941814	ESD	Sus scrofa esterase D (ESD), mRNA. [Source:RefSeq mRNA;Acc:NM_214060]|11|ENSSSCG00000009407|ENSSSCT00000010306	2.48029e+06	2476798	2.35878e+06	2.63332e+06	2452255	2.44937e+06	2.36665e+06	2502616	2.36975e+06	2.64591e+06	2.21638e+06	2.59493e+06	2.49247e+06	2197528	2.73148e+06	2.32474e+06	2.5078e+06	2.59566e+06	2.59764e+06	21.24	21.1696	21.3285	21.2257	21.1744	21.255	21.1763	21.3353	21.0798	21.3073	21.0675	21.3813	21.1486	21.258	21.3077	21.3088	11	11	11	11	9	8	11
>ENSSSCP00000000399	34	0.866172	0.0439024	0.835252	0.020534	ESYT1	extended synaptotagmin-like protein 1 [Source:HGNC Symbol;Acc:29534]|5|ENSSSCG00000000379|ENSSSCT00000000405	1.85483e+06	1.99027e+06	1.78707e+06	1.6552e+06	1.98678e+06	1.6066e+06	1.64923e+06	1.86991e+06	1.56141e+06	1.42732e+06	1.52075e+06	1.61099e+06	1.54925e+06	1.61572e+06	1.5255e+06	1.46288e+06	1.50037e+06	1.53277e+06	1658265	20.9245	20.7692	20.6586	20.922	20.6534	20.8345	20.5744	20.4449	20.5364	20.6195	20.6237	20.5408	20.4804	20.5169	20.5477	20.6612	32	32	31	33	26	23	32
>ENSSSCP00000017382	14	0.932948	0.331679	1.0391	0.51533	ESYT2	extended synaptotagmin-like protein 2 [Source:HGNC Symbol;Acc:22211]|18|ENSSSCG00000016406|ENSSSCT00000017863	249193	283902	242867	217894	252107	232484	255457	242250	219763	207473	235229	234730	258935	257591	254084	241821	261558	255968	282588	18.115	17.8898	17.7333	17.9437	17.9627	17.8861	17.7456	17.6626	17.8437	17.8406	17.9747	17.9549	17.8836	17.9968	17.9656	18.1083	8	8	8	6	3	7	9
>ENSSSCP00000015251	18	0.934263	0.331487	0.932725	0.326671	ETF1	eukaryotic translation termination factor 1 [Source:HGNC Symbol;Acc:3477]|2|ENSSSCG00000014337|ENSSSCT00000015664	1.5565e+06	1.78361e+06	1.41046e+06	1.43529e+06	1.59666e+06	1.45418e+06	1.52419e+06	1.46916e+06	1539812	1.35908e+06	1.47213e+06	1.36074e+06	1.45179e+06	1.57366e+06	1.51137e+06	1.50236e+06	1.36941e+06	1.30346e+06	1.45049e+06	20.7664	20.4277	20.4529	20.6066	20.5396	20.4866	20.5543	20.3742	20.4895	20.376	20.5857	20.5274	20.5188	20.3851	20.3139	20.4681	16	15	15	16	14	15	17
>ENSSSCP00000002037	14	0.986302	0.741478	0.93785	0.15208	ETFA	Sus scrofa electron-transfer-flavoprotein, alpha polypeptide (ETFA), nuclear gene encoding mitochondrial protein, mRNA. [Source:RefSeq mRNA;Acc:NM_001244403]|7|ENSSSCG00000001862|ENSSSCT00000002087	1.0836e+06	1.0415e+06	1.0264e+06	1.17153e+06	1.09495e+06	1.06875e+06	973715	1113744	1.04585e+06	1.19779e+06	981985	1099439	1.01625e+06	919727	1.12995e+06	1.01832e+06	1.00921e+06	992252	1.02805e+06	19.9902	19.9692	20.16	20.0624	19.8931	20.087	19.9962	20.1919	19.9053	20.0683	19.8108	20.1078	19.9578	19.9448	19.9203	19.9715	13	14	13	14	11	12	14
>ENSSSCP00000003505	2	0.93974	0.151045	0.92218	0.0971838	ETFB	Sus scrofa electron-transfer-flavoprotein, beta polypeptide (ETFB), mRNA. [Source:RefSeq mRNA;Acc:NM_001205279]|6|ENSSSCG00000003229|ENSSSCT00000003588	220840	210049	208286	237573	227451	207532	197664	205794	216362	216949	206713	201710	203654	204413	216076	224814	187898	194242	194482	17.6804	17.6682	17.858	17.7952	17.5927	17.6508	17.7231	17.727	17.6573	17.6219	17.6411	17.7212	17.7784	17.5196	17.5675	17.5693	12	11	11	10	10	10	12
>ENSSSCP00000009469	8	1.0355	0.538589	1.15794	0.0738225	ETFDH	electron-transferring-flavoprotein dehydrogenase [Source:HGNC Symbol;Acc:3483]|8|ENSSSCG00000008877|ENSSSCT00000009718	110850	120195	113421	93517.8	116268	114786	114752	113370	119123	111760	113822	115889	128358	127457	127740	124334	130522	129852	130243	16.875	16.7913	16.513	16.8271	16.8082	16.7907	16.8621	16.77	16.7964	16.8224	16.9597	16.9629	16.9239	16.9939	16.9865	16.9909	4	4	3	5	3	2	6
>ENSSSCP00000003318	4	1.27363	0.424376	1.06725	0.657719	ETHE1	Uncharacterized protein [Source:UniProtKB/TrEMBL;Acc:F1RMV5]|6|ENSSSCG00000003064|ENSSSCT00000003401	85574.9	25874	94598.2	116794	105033	108990	72660	105179	105552	105080	78412.4	187059	91329.9	118286	114051	68279	69590	68621.9	109151	14.6592	16.5295	16.8336	16.6805	16.1489	16.6825	16.6876	16.6811	16.2588	17.5131	16.8519	16.7993	16.0592	16.0866	16.0664	16.736	2	4	4	3	0	2	3
>ENSSSCP00000010645	5	0.912046	0.115834	0.826371	0.0146262	EWSR1	EWS RNA-binding protein 1 [Source:HGNC Symbol;Acc:3508]|14|ENSSSCG00000009974|ENSSSCT00000010930	682536	628370	696106	757846	647820	622504	583626	637431	635697	651926	610639	615705	564027	447613	593699	598080	579252	583251	582269	19.2613	19.4089	19.5315	19.3052	19.1547	19.2819	19.278	19.3143	19.22	19.2319	18.7719	19.1794	19.19	19.1438	19.1538	19.1513	2	4	4	4	2	2	4
>ENSSSCP00000001053	12	1.02835	0.592792	1.0842	0.130969	EXOC2	exocyst complex component 2 [Source:HGNC Symbol;Acc:24968]|7|ENSSSCG00000000985|ENSSSCT00000001075	202650	211254	212676	182311	204358	208395	211488	212962	231438	181906	212907	199671	219714	246240	206896	215081	213127	203557	233385	17.6886	17.6983	17.476	17.6407	17.6902	17.7002	17.8203	17.4728	17.6999	17.6073	17.9097	17.6585	17.7145	17.7014	17.6351	17.8324	8	7	7	9	1	6	12
>ENSSSCP00000017529	6	1.0228	0.863553	1.07757	0.572585	EXOC4	Uncharacterized protein [Source:UniProtKB/TrEMBL;Acc:F1SNG6]|18|ENSSSCG00000016543|ENSSSCT00000018013	73647.3	80721.8	81333.8	59642.6	72890.8	75326.7	101480	75006.3	76491.9	65971.2	69271.1	63740.3	79359.8	71859.5	74523.3	69882.8	62369.4	87191.3	110333	16.3007	16.3116	15.8641	16.1534	16.6308	16.1947	16.223	16.0095	16.08	15.9599	16.1329	16.1854	16.0927	15.9286	16.4119	16.7515	4	3	3	4	2	2	6
>ENSSSCP00000005445	6	0.907718	0.118361	0.989251	0.84119	EXOC5	exocyst complex component 5 [Source:HGNC Symbol;Acc:10696]|1|ENSSSCG00000005066|ENSSSCT00000005583	98735.5	111745	95530.2	94128.9	93537.8	89624	86046.8	84748.3	102082	82735.7	87307.7	94823.1	97674.2	98821.5	105895	98668	85440.3	87159.1	110061	16.7699	16.5437	16.5223	16.5133	16.3928	16.3709	16.6394	16.3362	16.4138	16.533	16.5925	16.6923	16.5903	16.3826	16.4114	16.7479	3	4	4	3	1	3	6
>ENSSSCP00000018213	9	1.0582	0.237253	1.00967	0.920357	EXOC7	exocyst complex component 7 [Source:HGNC Symbol;Acc:23214]|12|ENSSSCG00000017190|ENSSSCT00000018715	134266	128344	137426	128567	142727	142080	147347	157521	125856	135958	150708	135090	135565	116569	122984	134937	159326	135034	144539	16.9697	17.0683	16.9722	17.1229	17.1689	17.2652	16.9414	17.0528	17.2014	17.0436	16.8308	16.9081	17.0419	17.2816	17.043	17.1411	7	8	6	7	6	6	10
>ENSSSCP00000006111	2	0.929698	0.367304	0.901629	0.33575	EXOSC2	exosome component 2 [Source:HGNC Symbol;Acc:17097]|1|ENSSSCG00000005704|ENSSSCT00000006273	13110.9	13785.7	13944.2	13848	10865.6	12189.2	10529.4	12707.5	11631.2	12625.3	11607.6	14034	11821.2	7179.49	13435.6	13049.9	11208	14125.9	11928.2	13.7509	13.7674	13.7574	13.4075	13.3621	13.6334	13.5057	13.624	13.5028	13.7766	12.8097	13.7138	13.6718	13.4522	13.7861	13.5421	1	1	2	0	0	1	2
>ENSSSCP00000002934	2	0.426918	0.123579	2.02537	0.965008	EXOSC6	exosome component 6 [Source:HGNC Symbol;Acc:19055]|6|ENSSSCG00000002719|ENSSSCT00000003013	37993.8	68727.9	24807.1	14962.8	43477.5	16220.3	19117	15420.3	14078.8	16584.1	18327.6	13793.8	76951.6	13305.2	64906.6	20087.5	337483	12819.5	13107.6	16.0686	14.5985	13.8691	15.408	14.2226	13.9125	13.7812	14.0175	14.1617	13.7517	13.6997	15.9861	14.294	18.3645	13.6461	13.6781	1	2	1	1	1	1	1
>ENSSSCP00000009705	2	0.957714	0.607541	1.13156	0.177364	EXOSC9	exosome component 9 [Source:HGNC Symbol;Acc:9137]|8|ENSSSCG00000009096|ENSSSCT00000009962	8925.11	7791.9	10358.6	9102.02	8447.95	8547.7	9328.77	9551.69	9018.1	8697.19	8484.16	6206.27	10099.3	12102.8	9478.63	11351.6	8544.07	9970.43	9148.29	12.9278	13.3385	13.152	13.0444	13.1875	13.2215	13.1386	13.0863	13.0506	12.5995	13.5631	13.2105	13.4706	13.0607	13.2834	13.1593	1	1	1	0	0	0	1
>ENSSSCP00000004385	14	1.05887	0.0710506	1.24018	4.8413e-05	EZR	ezrin [Source:HGNC Symbol;Acc:12691]|1|ENSSSCG00000004058|ENSSSCT00000004487	2330051	2.22651e+06	2.35389e+06	2309639	2.43017e+06	2.46722e+06	2.59114e+06	2.34991e+06	2.42383e+06	2548766	2.57525e+06	2.31445e+06	2.88968e+06	2.9815e+06	2.98044e+06	2.98107e+06	2.94125e+06	2.7464e+06	2707426	21.0864	21.1666	21.1392	21.2126	21.3052	21.1642	21.2089	21.2814	21.2963	21.1422	21.5076	21.5071	21.5074	21.488	21.3891	21.3685	14	14	14	14	12	13	14
>ENSSSCP00000022354	5	0.629558	6.51486e-05	0.443044	7.49018e-06	F3	coagulation factor III (thromboplastin, tissue factor) [Source:HGNC Symbol;Acc:3541]|4|ENSSSCG00000022447|ENSSSCT00000027504	662479	667015	684391	640385	658126	417069	361738	401039	431670	377750	443249	486968	293508	354280	289041	307579	272070	295632	242444	19.3474	19.3845	19.2886	19.328	18.4646	18.6134	18.7196	18.5271	18.7578	18.8935	18.4345	18.1409	18.2306	18.0536	18.1734	17.8873	5	5	5	5	5	5	5
>ENSSSCP00000006564	10	0.900355	0.501013	0.845282	0.333675	FABP5	Sus scrofa fatty acid binding protein 5 (psoriasis-associated) (FABP5), mRNA. [Source:RefSeq mRNA;Acc:NM_001039746]|4|ENSSSCG00000006153|ENSSSCT00000006747	11546984	10088261	9545393	15916431	10637851	1.03964e+07	7.02242e+06	9567551	8605044	14311470	9896146	12975703	9.76046e+06	4591035	14166745	6964696	10727663	12707370	9405254	23.2662	23.1864	23.924	23.3427	22.7435	23.1897	23.0368	23.7707	23.2384	23.6293	22.1304	23.756	22.7316	23.3548	23.5992	23.165	9	9	10	10	9	9	9
>ENSSSCP00000004572	6	1.07431	0.773742	1.11218	0.810202	FABP7	fatty acid binding protein 7, brain [Source:HGNC Symbol;Acc:3562]|1|ENSSSCG00000004234|ENSSSCT00000004679	355589	200638	329289	590233	302198	382015	233158	252803	323402	666177	366641	449906	395481	150091	493974	436113	496789	574699	221216	17.6142	18.329	19.1709	18.2051	17.8309	17.9477	18.303	19.3455	18.484	18.7793	17.1955	18.9141	18.7343	18.9223	19.1324	17.7551	4	6	6	5	2	3	6
>ENSSSCP00000013903	6	0.883452	0.120483	0.745166	0.00740946	FADS2	fatty acid desaturase 2 [Source:HGNC Symbol;Acc:3575]|2|ENSSSCG00000013072|ENSSSCT00000014289	162568	186307	151313	145395	167255	143621	129198	139073	162801	130619	142759	157275	121140	128758	114602	131224	120046	120373	111836	17.5073	17.2072	17.1496	17.3517	16.9792	17.0855	17.3127	16.995	17.1232	17.2629	16.9743	16.8063	17.0017	16.8732	16.8772	16.771	3	5	5	5	3	3	6
>ENSSSCP00000014948	6	0.998781	0.995433	1.04058	0.45692	FAF2	Fas associated factor family member 2 [Source:HGNC Symbol;Acc:24666]|2|ENSSSCG00000014057|ENSSSCT00000015356	215602	244491	202663	198580	216677	215340	222104	236278	217971	188644	221504	205537	224351	208681	215817	231173	229318	220648	240469	17.8994	17.6287	17.5994	17.7252	17.7609	17.8501	17.7338	17.5253	17.757	17.649	17.6709	17.7194	17.8186	17.807	17.7514	17.8755	5	4	4	4	3	3	7
>ENSSSCP00000001946	10	1.05048	0.380905	1.19883	0.0133502	FAH	fumarylacetoacetate hydrolase (fumarylacetoacetase) [Source:HGNC Symbol;Acc:3579]|7|ENSSSCG00000001780|ENSSSCT00000001995	168877	174607	148340	176216	176345	177402	190671	158313	186378	167709	188764	172574	202455	211003	208206	207447	208164	177824	202086	17.4138	17.1785	17.427	17.428	17.5407	17.2724	17.5079	17.3556	17.5262	17.3969	17.6869	17.6677	17.6624	17.6674	17.4401	17.6246	5	5	4	8	4	7	10
>ENSSSCP00000008670	13	1.0055	0.923177	1.04371	0.450989	FAHD2A	Uncharacterized protein [Source:UniProtKB/TrEMBL;Acc:F1SU52]|3|ENSSSCG00000008120|ENSSSCT00000008896	534773	489036	531133	610982	507943	537714	480617	504911	578625	604526	537868	519738	558146	518669	583674	591076	585597	549490	520369	18.8996	19.0187	19.2208	18.9543	18.8745	18.9457	19.1423	19.2054	19.0369	18.9874	18.9845	19.1548	19.173	19.1595	19.0677	18.9892	9	12	12	11	7	7	11
>ENSSSCP00000009363	10	0.964492	0.243647	1.02288	0.699048	FAM114A1	family with sequence similarity 114, member A1 [Source:HGNC Symbol;Acc:25087]|8|ENSSSCG00000008785|ENSSSCT00000009611	384586	365063	404651	380152	388479	370930	376657	386787	357153	344865	373214	386905	393387	363720	392378	341410	391657	459700	411459	18.4778	18.6263	18.5362	18.5675	18.5229	18.5612	18.4462	18.3957	18.5096	18.5616	18.4725	18.5819	18.3811	18.5792	18.8103	18.6504	9	8	9	7	4	5	8
>ENSSSCP00000008628	18	1.00545	0.908332	0.974512	0.587995	FAM120A	family with sequence similarity 120A [Source:HGNC Symbol;Acc:13247]|3|ENSSSCG00000008079|ENSSSCT00000008852	378191	408283	365188	345464	393828	380251	378987	344684	424175	374890	388975	369793	368551	403414	354384	354265	357650	373372	368222	18.6392	18.4783	18.3982	18.5872	18.5318	18.3949	18.6943	18.5161	18.5693	18.4964	18.6219	18.435	18.4345	18.4482	18.5103	18.4902	11	16	10	14	5	10	14
>ENSSSCP00000027903	5	0.979421	0.804594	0.967449	0.671725	FAM120B	Uncharacterized protein [Source:UniProtKB/TrEMBL;Acc:I3LUV2]|1|ENSSSCG00000029697|ENSSSCT00000026580	171760	200180	167550	150292	169018	168226	166592	164095	182973	153874	169036	172785	166169	173547	170912	163983	161823	147950	178801	17.6109	17.3542	17.1974	17.3668	17.346	17.3242	17.4813	17.2314	17.367	17.3986	17.405	17.3829	17.3232	17.3041	17.1748	17.448	3	4	5	3	1	2	5
>ENSSSCP00000006014	24	0.77767	0.0123875	0.685014	0.00152227	FAM129B	family with sequence similarity 129, member B [Source:HGNC Symbol;Acc:25282]|1|ENSSSCG00000005614|ENSSSCT00000006173	1.76012e+06	1.97291e+06	1.63364e+06	1.56595e+06	1.86796e+06	1.36879e+06	1.44984e+06	1.47868e+06	1.34054e+06	1.2476e+06	1.36674e+06	1.32934e+06	1.2057e+06	1.31326e+06	1.31936e+06	1.13663e+06	1.13395e+06	1066715	1.26431e+06	20.9119	20.6397	20.5786	20.833	20.4675	20.4959	20.3544	20.2507	20.3823	20.3423	20.3247	20.3314	20.1163	20.1129	20.0247	20.2699	23	23	23	24	21	20	24
>ENSSSCP00000017170	4	0.623161	0.0226351	0.735113	0.123508	FAM134A	family with sequence similarity 134, member A [Source:HGNC Symbol;Acc:28450]|15|ENSSSCG00000016207|ENSSSCT00000017648	203753	180256	220346	208018	206390	126971	152012	95177.9	86189.7	194350	69704.7	164390	149781	179777	166884	183635	50573.7	199312	118506	17.4597	17.7494	17.6664	17.655	17.2138	16.5383	16.3952	17.5683	16.089	17.3268	17.4558	17.3485	17.4865	15.6261	17.6047	16.8546	2	1	1	3	1	2	3
>ENSSSCP00000018430	3	0.978439	0.931098	1.17031	0.357049	FAM134C	family with sequence similarity 134, member C [Source:HGNC Symbol;Acc:27258]|12|ENSSSCG00000017395|ENSSSCT00000018935	35779.7	41900.5	29255.3	28696.5	43266.6	35008.3	33901.3	32586.9	43544.3	36220.9	28551.3	35244.9	41873.3	39245	66811.7	36390.9	36305.6	35706.1	36780.7	15.3547	14.8364	14.8086	15.401	15.0491	14.992	15.4102	15.1445	14.8013	15.1051	15.2602	16.0278	15.1513	15.1479	15.1239	15.1667	2	2	2	1	0	1	2
>ENSSSCP00000024546	7	0.997367	0.90113	1.01385	0.880031	FAM162A	family with sequence similarity 162, member A [Source:HGNC Symbol;Acc:17865]|13|ENSSSCG00000026990|ENSSSCT00000025122	145635	133101	144270	168737	136431	145251	164103	153211	113836	112850	161214	166293	147652	155090	126040	127319	150107	152511	174846	17.0222	17.1384	17.3644	17.0578	17.3242	17.2252	16.7966	16.784	17.2986	17.3434	17.2427	16.9435	16.9581	17.1956	17.2186	17.4157	5	7	6	6	3	4	7
>ENSSSCP00000014969	9	1.18461	0.00805462	1.20644	0.00414063	FAM169A	family with sequence similarity 169, member A [Source:HGNC Symbol;Acc:29138]|2|ENSSSCG00000014076|ENSSSCT00000015377	270028	260635	298051	260686	260740	319879	321589	319380	299031	323851	317666	337755	325773	339914	331705	306989	304279	364480	307267	17.9917	18.1852	17.992	17.9923	18.2949	18.2849	18.1899	18.305	18.2772	18.3656	18.3748	18.3395	18.2278	18.215	18.4755	18.2291	6	11	9	9	4	8	11
>ENSSSCP00000011447	4	1.16321	0.141768	1.32799	0.0071387	FAM175B	family with sequence similarity 175, member B [Source:HGNC Symbol;Acc:28975]|14|ENSSSCG00000010737|ENSSSCT00000011749	43731.8	50564.3	43938.5	38685.9	41738.6	50869.5	62324.4	54398.4	49107.4	37579.9	48988.3	52818.7	58075.5	66156.7	58051	47425.5	54917.2	57197	64705.7	15.6258	15.4232	15.2395	15.3491	15.9275	15.7313	15.5837	15.1977	15.5801	15.6888	16.0136	15.825	15.5334	15.745	15.8037	15.9816	2	3	1	3	2	1	4
>ENSSSCP00000017665	2	1.11239	0.530931	1.34001	0.110308	FAM188B	|18|ENSSSCG00000016676|ENSSSCT00000018156	21735.8	14207.9	25318.9	21184.5	26232	24178.8	23077.4	17204.2	29878	30435.1	25037.4	19440.8	29126.2	28724.4	26701.4	30391.9	35628.3	30810.9	22500.1	13.7944	14.6279	14.3707	14.679	14.4942	14.0705	14.8668	14.8934	14.6118	14.2468	14.81	14.7046	14.8914	15.1207	14.9112	14.4576	0	2	0	1	0	1	2
>ENSSSCP00000011028	9	0.955698	0.535848	0.827254	0.0352526	FAM213A	family with sequence similarity 213, member A [Source:HGNC Symbol;Acc:28651]|14|ENSSSCG00000010340|ENSSSCT00000011320	1.15771e+06	1272898	1.049e+06	1043063	1.26587e+06	1.10642e+06	1.18301e+06	1123423	1.17109e+06	1.00424e+06	976095	1180667	957720	1.06456e+06	970700	956171	882715	915890	956285	20.2797	20.0006	19.9924	20.2717	20.174	20.0995	20.1594	19.9377	19.8967	20.1712	20.0218	19.8887	19.8669	19.7516	19.8048	19.8671	8	8	8	8	6	7	9
>ENSSSCP00000008519	6	0.942681	0.544183	1.01328	0.832786	FAM234A	Uncharacterized protein [Source:UniProtKB/TrEMBL;Acc:F1RGX2]|3|ENSSSCG00000007980|ENSSSCT00000008743	129842	156466	125238	110151	127511	122399	128828	117071	143330	97347.9	131522	116297	131566	151504	140192	123541	124038	127433	122691	17.2555	16.9343	16.7491	16.9603	16.9751	16.837	17.129	16.5709	17.0049	16.8275	17.209	17.097	16.9146	16.9204	16.9594	16.9047	4	3	4	4	3	4	5
[truncated: 1,908 more rows]
[truncated: 31 more columns]
