# Supplementary material for: High glucose treatment promotes extracellular matrix proteome remodeling in Mller glial cells
Source: PeerJ. 2021 May 18;9:e11316. doi: 10.7717/peerj.11316 (PMC8139267; doi:10.7717/peerj.11316)
Supplement: Supplemental Information 2 — A total of 2,744 proteins quantified with 2 unique peptides were detected across in all treatment groups and replicates. [file peerj-09-11316-s002.xlsx]

## Sheet: high glucose treatment
PG.ProteinAccessions	number of peptides used for quantification	ratio highgluc/ lowgluc	T-TEST highgluc/ lowgluc	Gene symbol	Category as listed in human matrisome	PG.ProteinDescriptions	mean lowgluc	[1] SAS11508X003__con1_92-68117.raw.PG.Quantity	[2] SAS11508X023__con2_92-68137.raw.PG.Quantity	[3] SAS11508X025__con3_92-68139.raw.PG.Quantity	[4] SAS11508X017__con4_92-68131.raw.PG.Quantity	mean highgluc	[7] SAS11508X016__hg1_92-68130.raw.PG.Quantity	[8] SAS11508X005__hg2_92-68119.raw.PG.Quantity	[9] SAS11508X028__hg3_92-68142.raw.PG.Quantity	[10] SAS11508X007__hg4_92-68121.raw.PG.Quantity	[11] SAS11508X010__hg5_92-68124.raw.PG.Quantity	[12] SAS11508X011__hg6_92-68125.raw.PG.Quantity	[1] SAS11508X003__con1_92-68117.raw.PG.Quantity	[2] SAS11508X023__con2_92-68137.raw.PG.Quantity	[3] SAS11508X025__con3_92-68139.raw.PG.Quantity	[4] SAS11508X017__con4_92-68131.raw.PG.Quantity	[7] SAS11508X016__hg1_92-68130.raw.PG.Quantity	[8] SAS11508X005__hg2_92-68119.raw.PG.Quantity	[9] SAS11508X028__hg3_92-68142.raw.PG.Quantity	[10] SAS11508X007__hg4_92-68121.raw.PG.Quantity	[11] SAS11508X010__hg5_92-68124.raw.PG.Quantity	[12] SAS11508X011__hg6_92-68125.raw.PG.Quantity	[1] SAS11508X003__con1_92-68117.raw.PG.NrOfStrippedSequencesIdentified	[2] SAS11508X023__con2_92-68137.raw.PG.NrOfStrippedSequencesIdentified	[3] SAS11508X025__con3_92-68139.raw.PG.NrOfStrippedSequencesIdentified	[4] SAS11508X017__con4_92-68131.raw.PG.NrOfStrippedSequencesIdentified	[5] SAS11508X027__con5_92-68141.raw.PG.NrOfStrippedSequencesIdentified	[6] SAS11508X024__con6_92-68138.raw.PG.NrOfStrippedSequencesIdentified	[7] SAS11508X016__hg1_92-68130.raw.PG.NrOfStrippedSequencesIdentified	[8] SAS11508X005__hg2_92-68119.raw.PG.NrOfStrippedSequencesIdentified	[9] SAS11508X028__hg3_92-68142.raw.PG.NrOfStrippedSequencesIdentified	[10] SAS11508X007__hg4_92-68121.raw.PG.NrOfStrippedSequencesIdentified	[11] SAS11508X010__hg5_92-68124.raw.PG.NrOfStrippedSequencesIdentified	[12] SAS11508X011__hg6_92-68125.raw.PG.NrOfStrippedSequencesIdentified	[1] SAS11508X003__con1_92-68117.raw.PG.NrOfStrippedSequencesUsedForQuantification	[2] SAS11508X023__con2_92-68137.raw.PG.NrOfStrippedSequencesUsedForQuantification	[3] SAS11508X025__con3_92-68139.raw.PG.NrOfStrippedSequencesUsedForQuantification	[4] SAS11508X017__con4_92-68131.raw.PG.NrOfStrippedSequencesUsedForQuantification	[5] SAS11508X027__con5_92-68141.raw.PG.NrOfStrippedSequencesUsedForQuantification	[6] SAS11508X024__con6_92-68138.raw.PG.NrOfStrippedSequencesUsedForQuantification	[7] SAS11508X016__hg1_92-68130.raw.PG.NrOfStrippedSequencesUsedForQuantification	[8] SAS11508X005__hg2_92-68119.raw.PG.NrOfStrippedSequencesUsedForQuantification	[9] SAS11508X028__hg3_92-68142.raw.PG.NrOfStrippedSequencesUsedForQuantification
>ENSSSCP00000017173	2	0.924646	0.0212536	ABCB6	none	ATP-binding cassette, sub-family B (MDR/TAP), member 6 [Source:HGNC Symbol;Acc:47]|15|ENSSSCG00000016210|ENSSSCT00000017651	318273	324561	312056	332587	303888	294290	292994	286866	281865	316185	300110	287719	18.3081	18.2514	18.3434	18.2132	18.1605	18.13	18.1046	18.2704	18.1951	18.1343	2	2	1	1	1	1	2	3	4	2	2	2	2	2	2	2	2	2	2	2	2
>ENSSSCP00000023719	5	1.35332	0.00288438	ABCD3	none	Sus scrofa ATP-binding cassette, sub-family D (ALD), member 3 (ABCD3), mRNA. [Source:RefSeq mRNA;Acc:NM_001244133]|4|ENSSSCG00000028620|ENSSSCT00000032329	33872.7	34729.4	31106.9	31886.5	37768	45840.7	45261.6	41613.2	49768.6	47824.4	53727.4	36848.8	15.0839	14.9249	14.9607	15.2049	15.466	15.3448	15.6029	15.5455	15.7134	15.1693	7	8	3	4	2	2	11	7	9	9	9	8	5	5	5	5	5	5	5	5	5
>ENSSSCP00000021124	4	1.29591	0.000790422	ABHD14B	none	abhydrolase domain containing 14B [Source:HGNC Symbol;Acc:28235]|13|ENSSSCG00000026847|ENSSSCT00000027042	51690.3	50805.7	51953.1	52844.7	51157.5	66986	72925.6	55846.7	67078.9	69521.4	68645.5	67898	15.6327	15.6649	15.6895	15.6427	16.1541	15.7692	16.0336	16.0852	16.0669	16.0511	3	3	3	2	1	2	4	5	4	4	4	4	4	4	4	4	4	4	4	4	4
>ENSSSCP00000012223	7	1.17998	0.0243151	ABHD6	none	abhydrolase domain containing 6 [Source:HGNC Symbol;Acc:21398]|13|ENSSSCG00000011470|ENSSSCT00000012552	152605	164694	145148	151113	149464	180070	175969	179288	218543	180279	148786	177556	17.3294	17.1472	17.2053	17.1894	17.425	17.4519	17.7376	17.4599	17.1829	17.4379	4	6	5	4	1	3	7	3	6	5	5	7	7	7	7	7	7	7	7	7	7
>ENSSSCP00000011995	2	1.32952	0.004067	ACAA1	none	Uncharacterized protein [Source:UniProtKB/TrEMBL;Acc:F1RRB7]|13|ENSSSCG00000011250|ENSSSCT00000012317	21330.5	20229.9	19012.5	23687.7	22392.1	28359.3	26374.4	25909.1	30852.1	29853.6	29190.5	27976.1	14.3042	14.2147	14.5319	14.4507	14.6869	14.6612	14.9131	14.8656	14.8332	14.7719	5	5	5	6	2	5	9	6	7	9	9	8	2	2	2	2	2	2	2	2	2
>ENSSSCP00000018749	13	0.868178	0.0342163	ACACA	none	acetyl-CoA carboxylase alpha [Source:HGNC Symbol;Acc:84]|12|ENSSSCG00000017694|ENSSSCT00000019259	279942	305433	269285	255270	289779	243039	238609	243886	246926	232338	246402	250074	18.2205	18.0388	17.9617	18.1446	17.8643	17.8958	17.9137	17.8259	17.9107	17.932	12	12	11	12	3	5	11	9	11	11	12	11	13	13	13	13	13	13	13	13	13
>ENSSSCP00000027866	12	0.902302	0.0141687	ACAD9	none	acyl-CoA dehydrogenase family, member 9 [Source:HGNC Symbol;Acc:21497]|13|ENSSSCG00000023354|ENSSSCT00000023990	233138	249590	226872	224036	232056	210361	215194	211194	201038	196517	215225	222999	17.9292	17.7915	17.7734	17.8241	17.7153	17.6882	17.6171	17.5843	17.7155	17.7667	7	6	7	7	2	5	11	10	7	7	8	7	12	12	12	12	12	12	12	12	12
>ENSSSCP00000024652	7	0.891857	0.0116703	ACBD3	none	acyl-CoA binding domain containing 3 [Source:HGNC Symbol;Acc:15453]|GL893507.1|ENSSSCG00000024180|ENSSSCT00000027902	119376	115193	123763	114125	124423	106466	105740	119828	98280.9	103993	107557	103399	16.8137	16.9172	16.8003	16.9249	16.6902	16.8706	16.5846	16.6661	16.7147	16.6579	4	6	5	6	4	5	5	8	5	4	7	4	7	7	7	7	7	7	7	7	7
>ENSSSCP00000011800	2	1.26387	0.0466437	ACBD5	none	Uncharacterized protein [Source:UniProtKB/TrEMBL;Acc:F1RVK3]|10|ENSSSCG00000011064|ENSSSCT00000012108	15067.3	14968.6	15232.5	14692.5	15375.7	19043.1	21032.5	12892.4	21823	17312.8	21871.3	19326.6	13.8697	13.8949	13.8428	13.9084	14.3603	13.6542	14.4136	14.0796	14.4168	14.2383	1	1	1	1	1	0	2	2	2	1	2	2	2	2	2	2	2	2	2	2	2
>ENSSSCP00000018460	24	0.849501	0.0166584	ACLY	none	ATP citrate lyase [Source:HGNC Symbol;Acc:115]|12|ENSSSCG00000017421|ENSSSCT00000018965	2.3825e+06	2.58928e+06	2.26869e+06	2.19406e+06	2.47795e+06	2.02393e+06	2.06049e+06	2.08753e+06	2.10282e+06	1.69036e+06	2.01833e+06	2.18408e+06	21.3041	21.1134	21.0652	21.2407	20.9746	20.9934	21.0039	20.6889	20.9447	21.0586	22	22	20	23	19	19	23	24	22	22	23	22	24	24	24	24	24	24	24	24	24
>ENSSSCP00000000070	36	0.957866	0.0379254	ACO2	none	aconitase 2, mitochondrial [Source:HGNC Symbol;Acc:118]|5|ENSSSCG00000000064|ENSSSCT00000000070	5935250	6.01029e+06	5984529	5759761	5.98642e+06	5.68517e+06	5669586	5518913	5933326	5708504	5867693	5.41301e+06	22.519	22.5128	22.4576	22.5133	22.4348	22.396	22.5004	22.4447	22.4844	22.368	30	35	32	34	30	31	33	36	33	35	37	33	36	36	36	36	36	36	36	36	36
>ENSSSCP00000003661	7	0.91164	0.0030311	ACOT7	none	acyl-CoA thioesterase 7 [Source:HGNC Symbol;Acc:24157]|6|ENSSSCG00000003377|ENSSSCT00000003747	274709	280220	279229	269797	269591	250436	242544	268573	249819	243639	259949	238093	18.0962	18.0911	18.0415	18.0404	17.8879	18.035	17.9305	17.8944	17.9879	17.8612	5	7	6	6	4	5	7	8	7	7	7	6	7	7	7	7	7	7	7	7	7
>ENSSSCP00000016755	13	0.921011	0.0102334	ADAM9	ECM Regulators	Uncharacterized protein [Source:UniProtKB/TrEMBL;Acc:F1RZL4]|15|ENSSSCG00000015808|ENSSSCT00000017216	321028	328954	325822	308691	320646	295671	290266	299478	281145	280855	320308	301971	18.3275	18.3137	18.2358	18.2906	18.147	18.1921	18.101	18.0995	18.2891	18.204	11	9	7	9	5	6	11	9	11	9	12	10	13	13	13	13	13	13	13	13	13
>ENSSSCP00000009266	22	1.1184	0.0190994	ADD1	none	Adducin 1 (Alpha); Sterol regulatory element-binding protein 1 [Source:UniProtKB/TrEMBL;Acc:F1S8P9]|8|ENSSSCG00000008692|ENSSSCT00000009510	1.51514e+06	1.61263e+06	1.52269e+06	1.42377e+06	1501444	1.69453e+06	1.70138e+06	1.6942e+06	1.68069e+06	1.70137e+06	1.72939e+06	1660141	20.621	20.5382	20.4413	20.5179	20.6983	20.6922	20.6806	20.6983	20.7218	20.6629	14	19	15	16	11	11	21	21	17	21	20	21	22	22	22	22	22	22	22	22	22
>ENSSSCP00000011315	20	1.11609	0.0177627	ADD3	none	adducin 3 (gamma) [Source:HGNC Symbol;Acc:245]|14|ENSSSCG00000010621|ENSSSCT00000011617	1.46611e+06	1.52811e+06	1.52019e+06	1356316	1.45981e+06	1.6363e+06	1.66452e+06	1.54003e+06	1.7521e+06	1.64079e+06	1663021	1.55735e+06	20.5433	20.5358	20.3713	20.4774	20.6667	20.5545	20.7407	20.646	20.6654	20.5707	17	18	18	18	11	12	20	18	18	16	17	19	20	20	20	20	20	20	20	20	20
>ENSSSCP00000025135	6	1.09204	0.0269917	AGPS	none	alkylglycerone phosphate synthase [Source:HGNC Symbol;Acc:327]|15|ENSSSCG00000023983|ENSSSCT00000030764	76046.6	73927.5	77545.2	73690.6	79023.3	83046	90474.1	81494.4	83063.8	80108.4	87770.6	75364.4	16.1738	16.2428	16.1692	16.27	16.4652	16.3144	16.3419	16.2897	16.4214	16.2016	5	4	4	3	1	2	5	6	7	6	7	6	6	6	6	6	6	6	6	6	6
>ENSSSCP00000007271	5	1.07537	0.0140745	AHCYL1	none	adenosylhomocysteinase-like 1 [Source:HGNC Symbol;Acc:344]|GL892439.2|ENSSSCG00000006816|ENSSSCT00000007467	144189	139017	146095	142271	149375	155056	145891	158408	150689	152628	161674	161048	17.0849	17.1565	17.1183	17.1886	17.1545	17.2733	17.2012	17.2197	17.3027	17.2971	3	5	4	2	3	2	4	5	5	4	5	4	5	5	5	5	5	5	5	5	5
>ENSSSCP00000019234	60	0.801247	0.000295873	AHNAK	none	AHNAK nucleoprotein [Source:HGNC Symbol;Acc:347]|2|ENSSSCG00000027969|ENSSSCT00000029753	1.46014e+07	13690243	14513941	15346548	14854953	1.16993e+07	10639500	11949644	11469903	11804028	11341538	12991416	23.7066	23.7909	23.8714	23.8244	23.3429	23.5105	23.4513	23.4928	23.4351	23.6311	56	59	57	59	45	48	57	57	57	58	56	55	60	60	60	60	60	60	60	60	60
>ENSSSCP00000002608	13	0.892343	0.00155433	AHSA1	none	Uncharacterized protein [Source:UniProtKB/TrEMBL;Acc:F1SE06]|7|ENSSSCG00000002406|ENSSSCT00000002675	573096	586662	548475	566792	590456	511398	522093	496137	537653	505581	519240	487685	19.1622	19.0651	19.1125	19.1715	18.9939	18.9204	19.0363	18.9476	18.986	18.8956	12	13	10	13	7	7	12	11	13	11	12	13	13	13	13	13	13	13	13	13	13
>ENSSSCP00000001497	4	1.18985	0.0182584	AIF1	none	Sus scrofa allograft inflammatory factor 1 (AIF1), mRNA. [Source:RefSeq mRNA;Acc:NM_001129950]|7|ENSSSCG00000001408|ENSSSCT00000001539	55785.9	51347.1	57236.2	61740.3	52819.8	66377	70059.3	56709.3	62942.6	72834.6	71319.3	64396.9	15.648	15.8046	15.9139	15.6888	16.0963	15.7913	15.9417	16.1523	16.122	15.9747	4	4	2	3	2	2	4	3	4	4	3	4	4	4	4	4	4	4	4	4	4
>ENSSSCP00000022764	14	0.911903	0.00670268	AIMP1	none	Sus scrofa aminoacyl tRNA synthetase complex-interacting multifunctional protein 1 (AIMP1), mRNA. [Source:RefSeq mRNA;Acc:NM_001114283]|8|ENSSSCG00000024168|ENSSSCT00000023345	865898	860020	862707	909158	831707	789615	765906	763481	795254	840036	776545	796467	19.714	19.7185	19.7942	19.6657	19.5468	19.5422	19.6011	19.6801	19.5667	19.6033	13	12	12	14	6	11	12	13	10	13	13	13	14	14	14	14	14	14	14	14	14
>ENSSSCP00000026614	6	1.25156	0.00160234	AIMP2	none	aminoacyl tRNA synthetase complex-interacting multifunctional protein 2 [Source:HGNC Symbol;Acc:20609]|3|ENSSSCG00000024245|ENSSSCT00000026197	213788	203102	234686	213178	204185	267568	301196	248477	258943	262460	251195	283139	17.6318	17.8404	17.7017	17.6395	18.2003	17.9228	17.9823	18.0017	17.9384	18.1112	6	6	6	5	4	3	6	7	6	6	7	7	6	6	6	6	6	6	6	6	6
>ENSSSCP00000027076	11	0.85837	0.0156786	AK2	none	adenylate kinase 2 [Source:HGNC Symbol;Acc:362]|GL894826.2|ENSSSCG00000024355|ENSSSCT00000030814	618501	586215	577656	676902	633229	530902	479906	537890	544145	565153	527508	530809	19.1611	19.1399	19.3686	19.2724	18.8724	19.037	19.0536	19.1083	19.0088	19.0178	8	11	10	9	6	7	9	9	10	11	10	9	11	11	11	11	11	11	11	11	11
>ENSSSCP00000014711	3	1.49626	0.0225999	AKAP8L	none	A kinase (PRKA) anchor protein 8-like [Source:HGNC Symbol;Acc:29857]|2|ENSSSCG00000013838|ENSSSCT00000015116	7769.43	6080.04	10297.3	7335.6	7364.76	11625.1	12273.5	9026.18	13333.6	12826.6	9921.83	12368.9	12.5699	13.33	12.8407	12.8464	13.5833	13.1399	13.7028	13.6468	13.2764	13.5944	1	1	1	0	0	0	1	3	1	3	3	2	3	3	3	3	3	3	3	3	3
>ENSSSCP00000003790	10	1.22327	0.00961228	AKR7L	none	aldo-keto reductase family 7-like [Source:HGNC Symbol;Acc:24056]|6|ENSSSCG00000003491|ENSSSCT00000003878	533111	600287	491923	529179	511057	652139	647951	618270	717242	602558	658758	668058	19.1953	18.9081	19.0134	18.9631	19.3055	19.2379	19.4521	19.2007	19.3294	19.3496	9	8	8	9	6	7	10	9	9	9	9	9	10	10	10	10	10	10	10	10	10
>ENSSSCP00000003435	11	1.15579	0.0282283	ALDH16A1	none	aldehyde dehydrogenase 16 family, member A1 [Source:HGNC Symbol;Acc:28114]|6|ENSSSCG00000003168|ENSSSCT00000003518	121623	109191	130947	118616	127740	140571	144459	143468	143748	121238	144883	145632	16.7365	16.9986	16.8559	16.9628	17.1403	17.1304	17.1332	16.8875	17.1445	17.152	5	9	7	7	2	4	8	8	10	9	8	7	11	11	11	11	11	11	11	11	11
>ENSSSCP00000009731	23	1.09783	0.00534005	ANK2	none	ankyrin 2, neuronal [Source:HGNC Symbol;Acc:493]|8|ENSSSCG00000009125|ENSSSCT00000009992	447361	440374	470735	438482	439852	491128	485212	476309	503380	503681	481905	496278	18.7484	18.8446	18.7422	18.7467	18.8883	18.8615	18.9413	18.9422	18.8784	18.9208	12	19	14	14	5	8	20	20	20	18	20	19	23	23	23	23	23	23	23	23	23
>ENSSSCP00000000856	5	0.748284	0.023878	ANO6	none	anoctamin 6 [Source:HGNC Symbol;Acc:25240]|5|ENSSSCG00000000804|ENSSSCT00000000873	88394.7	88043	79232.6	88350.5	97952.6	66144.4	57652.4	77660.5	63448.2	43616.2	68738.2	85750.8	16.4259	16.2738	16.431	16.5798	15.8151	16.2449	15.9533	15.4126	16.0688	16.3879	3	1	2	3	0	2	4	5	1	1	3	1	5	5	5	5	5	5	5	5	5
>ENSSSCP00000008903	2	1.3554	0.0334611	ANTXR1	none	anthrax toxin receptor 1 [Source:HGNC Symbol;Acc:21014]|3|ENSSSCG00000008340|ENSSSCT00000009134	10319.2	9682.49	9918.43	8525.91	13150.1	13986.6	14155.6	14719.4	13933.8	12076.8	15757	13277.4	13.2412	13.2759	13.0576	13.6828	13.7891	13.8454	13.7663	13.56	13.9437	13.6967	1	1	1	1	0	0	2	1	1	1	1	2	2	2	2	2	2	2	2	2	2
>ENSSSCP00000011058	17	0.612526	7.52322e-05	ANXA8	ECM-affiliated Proteins	Sus scrofa annexin A8 (ANXA8), mRNA. [Source:RefSeq mRNA;Acc:NM_001243599]|14|ENSSSCG00000010370|ENSSSCT00000011352	1.7028e+06	1.85889e+06	1.68303e+06	1.50623e+06	1.76305e+06	1.04301e+06	1.08427e+06	1.25672e+06	979253	923169	1.02351e+06	991132	20.826	20.6826	20.5225	20.7496	20.0483	20.2612	19.9013	19.8162	19.9651	19.9187	17	18	16	18	19	14	18	18	14	15	15	13	17	17	17	17	17	17	17	17	17
>ENSSSCP00000021552	22	0.87178	0.00482324	ARCN1	none	archain 1 [Source:HGNC Symbol;Acc:649]|9|ENSSSCG00000030053|ENSSSCT00000028599	1.64102e+06	1.74373e+06	1.55922e+06	1.58903e+06	1.6721e+06	1.43061e+06	1.48091e+06	1451160	1.49891e+06	1.33632e+06	1.40803e+06	1408318	20.7337	20.5724	20.5997	20.6732	20.4981	20.4688	20.5155	20.3498	20.4252	20.4255	22	21	21	21	20	19	23	22	22	22	22	21	22	22	22	22	22	22	22	22	22
>ENSSSCP00000014073	2	0.865132	0.0365209	ARFGAP2	none	Sus scrofa ADP-ribosylation factor GTPase activating protein 2 (ARFGAP2), mRNA. [Source:RefSeq mRNA;Acc:NM_001244552]|2|ENSSSCG00000013245|ENSSSCT00000014465	28959.8	28749.1	26153.3	28895.5	32041.4	25054.1	23939.4	26521	23814.9	27440.7	27142	21466.5	14.8112	14.6747	14.8186	14.9676	14.5471	14.6948	14.5396	14.744	14.7282	14.3898	2	2	1	3	1	2	4	4	3	3	4	4	2	2	2	2	2	2	2	2	2
>ENSSSCP00000000039	7	0.820529	0.005905	ARFGAP3	none	ADP-ribosylation factor GTPase activating protein 3 [Source:HGNC Symbol;Acc:661]|5|ENSSSCG00000000037|ENSSSCT00000000039	149786	151780	137887	149851	159629	122904	116097	149295	111123	125421	112226	123262	17.2116	17.0731	17.1932	17.2844	16.825	17.1878	16.7618	16.9364	16.776	16.9114	7	7	7	7	5	7	6	6	7	7	6	6	7	7	7	7	7	7	7	7	7
>ENSSSCP00000010183	2	0.790595	0.00956463	ARGLU1	none	ssc-mir-7144 [Source:miRBase;Acc:MI0023577]|11|ENSSSCG00000009536|ENSSSCT00000010454	11228.2	12209	11941.9	9763.63	10998.3	8876.97	8230.11	8885.04	9688.32	8875.9	9935.54	7646.91	13.5757	13.5437	13.2532	13.425	13.0067	13.1172	13.242	13.1157	13.2784	12.9007	2	2	0	1	1	2	1	1	2	1	1	1	2	2	2	2	2	2	2	2	2
>ENSSSCP00000004539	2	1.94573	0.0261894	ARHGAP18	none	Uncharacterized protein [Source:UniProtKB/TrEMBL;Acc:F1S306]|1|ENSSSCG00000004205|ENSSSCT00000004646	2680.03	3920.26	1853.47	1945.03	3001.36	5214.62	4934.89	4566.94	5383.49	5966.99	5173.39	5262.03	11.9367	10.856	10.9256	11.5514	12.2688	12.157	12.3943	12.5428	12.3369	12.3614	0	0	0	0	0	0	1	1	0	2	0	0	2	2	2	2	2	2	2	2	2
>ENSSSCP00000008907	2	1.42488	0.0441684	ARHGAP25	none	Rho GTPase activating protein 25 [Source:HGNC Symbol;Acc:28951]|3|ENSSSCG00000008344|ENSSSCT00000009138	7474.38	6362.63	7710.85	9980.89	5843.16	10650.1	10441.6	8298.59	10217.1	12766.6	11207.4	10969	12.6354	12.9127	13.285	12.5125	13.3501	13.0186	13.3187	13.6401	13.4522	13.4211	0	0	0	0	0	0	2	1	2	1	1	2	2	2	2	2	2	2	2	2	2
>ENSSSCP00000000930	7	0.855956	0.0287729	ARL1	none	Sus scrofa ADP-ribosylation factor-like 1 (ARL1), mRNA. [Source:RefSeq mRNA;Acc:NM_001031784]|5|ENSSSCG00000000870|ENSSSCT00000000950	250714	255397	220420	263727	263310	214600	200403	214226	224582	224438	214111	209839	17.9624	17.7499	18.0087	18.0064	17.6125	17.7088	17.7769	17.776	17.708	17.6789	4	5	3	6	3	3	5	5	6	4	7	3	7	7	7	7	7	7	7	7	7
>ENSSSCP00000025216	3	1.42582	0.00387927	ARSD	none	arylsulfatase D [Source:HGNC Symbol;Acc:717]|GL896120.1|ENSSSCG00000020871|ENSSSCT00000027390	7501.44	6475.27	8475.74	7084.3	7970.44	10695.7	13064.1	9194.55	9708.56	9882.85	12521.3	9802.86	12.6607	13.0491	12.7904	12.9604	13.6733	13.1666	13.245	13.2707	13.6121	13.259	2	2	1	2	0	0	4	3	3	3	4	3	3	3	3	3	3	3	3	3	3
>ENSSSCP00000008264	2	1.16304	0.038518	ASL	none	Uncharacterized protein [Source:UniProtKB/TrEMBL;Acc:F1RJH8]|3|ENSSSCG00000007738|ENSSSCT00000008483	14711.6	13812.8	14977.8	13646.2	16409.8	17110.2	16908.3	18505.7	19563.1	15569.7	17180.1	14934.4	13.7537	13.8705	13.7362	14.0023	14.0454	14.1757	14.2559	13.9265	14.0684	13.8663	0	1	0	0	0	0	3	2	2	0	2	2	2	2	2	2	2	2	2	2	2
>ENSSSCP00000016267	17	0.748068	0.0034853	ASNS	none	Sus scrofa asparagine synthetase (glutamine-hydrolyzing) (ASNS), mRNA. [Source:RefSeq mRNA;Acc:NM_001167640]|9|ENSSSCG00000015340|ENSSSCT00000016713	719872	787502	654133	659816	778037	538513	561444	613454	539826	454674	515794	545884	19.5869	19.3192	19.3317	19.5695	19.0988	19.2266	19.0421	18.7945	18.9764	19.0582	17	16	14	15	15	13	17	16	14	11	15	14	17	17	17	17	17	17	17	17	17
>ENSSSCP00000023952	6	1.12857	0.0420445	ASPH	none	Uncharacterized protein [Source:UniProtKB/TrEMBL;Acc:I3LIP6]|4|ENSSSCG00000025087|ENSSSCT00000028806	185316	200480	176526	170235	194024	209143	220550	215373	221421	188236	208422	200854	17.6131	17.4295	17.3772	17.5659	17.7507	17.7165	17.7564	17.5222	17.6692	17.6158	3	3	2	4	1	1	5	5	3	5	6	3	6	6	6	6	6	6	6	6	6
>ENSSSCP00000003299	17	0.792139	0.0346777	ATP1A3	none	ATPase, Na+/K+ transporting, alpha 3 polypeptide [Source:HGNC Symbol;Acc:801]|6|ENSSSCG00000003045|ENSSSCT00000003382	508032	557569	465754	517390	491415	402432	356970	538663	375281	398480	454902	290295	19.0888	18.8292	18.9809	18.9066	18.4454	19.039	18.5176	18.6041	18.7952	18.1472	5	11	10	8	4	5	15	6	16	13	12	10	17	17	17	17	17	17	17	17	17
>ENSSSCP00000006713	5	1.23144	0.0495409	ATP1B1	none	Sodium/potassium-transporting ATPase subunit beta-1 [Source:UniProtKB/Swiss-Prot;Acc:P05027]|4|ENSSSCG00000006296|ENSSSCT00000006901	498510	584321	479552	418658	511507	613883	607729	639749	591873	602737	651320	589891	19.1564	18.8713	18.6754	18.9644	19.2131	19.2871	19.1749	19.2012	19.313	19.1701	5	5	5	5	5	5	5	5	5	5	5	5	5	5	5	5	5	5	5	5	5
>ENSSSCP00000002995	10	0.93481	0.000351445	ATP6V0D1	none	ATPase, H+ transporting, lysosomal 38kDa, V0 subunit d1 [Source:HGNC Symbol;Acc:13724]|6|ENSSSCG00000002776|ENSSSCT00000003074	524173	529526	517176	521915	528075	490002	497924	476708	506881	480086	493072	485343	19.0143	18.9803	18.9935	19.0104	18.9256	18.8627	18.9513	18.8729	18.9114	18.8886	8	10	9	8	6	7	8	11	10	8	8	8	10	10	10	10	10	10	10	10	10
>ENSSSCP00000010498	3	0.85867	0.00246831	ATXN2	none	Uncharacterized protein [Source:UniProtKB/TrEMBL;Acc:F1RMZ0]|14|ENSSSCG00000009834|ENSSSCT00000010778	37613.3	35203.1	37214.6	39030	39005.2	32297.4	29650.7	32747.2	34708.7	30904.3	32038	33735.3	15.1034	15.1836	15.2523	15.2514	14.8558	14.9991	15.083	14.9155	14.9675	15.042	3	11	6	7	0	3	8	8	7	8	9	10	3	3	3	3	3	3	3	3	3
>ENSSSCP00000024437	2	0.836755	0.0179929	B3GAT3	none	beta-1,3-glucuronyltransferase 3 (glucuronosyltransferase I) [Source:HGNC Symbol;Acc:923]|2|ENSSSCG00000020809|ENSSSCT00000023287	35045	34878.3	36553.2	35127.8	33620.9	29324.1	34057.2	32819.2	30340.8	25427.3	28831.6	24468.6	15.09	15.1577	15.1003	15.0371	15.0557	15.0023	14.889	14.6341	14.8154	14.5786	1	2	1	1	0	0	2	1	1	1	1	1	2	2	2	2	2	2	2	2	2
>ENSSSCP00000001622	3	0.735435	0.00146415	BAG2	none	Uncharacterized protein [Source:UniProtKB/TrEMBL;Acc:F1RZV1]|7|ENSSSCG00000001494|ENSSSCT00000001666	23827.6	22066	25688.9	24998.2	22557.3	17523.7	18408.3	13387.9	17847	17782.2	18477.3	19239.3	14.4295	14.6489	14.6095	14.4613	14.1681	13.7086	14.1234	14.1181	14.1735	14.2318	2	3	2	1	0	1	2	2	2	3	2	3	3	3	3	3	3	3	3	3	3
>ENSSSCP00000017746	7	1.15519	0.00409533	BLVRA	none	biliverdin reductase A [Source:HGNC Symbol;Acc:1062]|18|ENSSSCG00000016756|ENSSSCT00000018238	264385	255858	261707	276508	263467	305415	322874	322605	301805	314200	306636	264368	17.965	17.9976	18.077	18.0073	18.3006	18.2994	18.2033	18.2613	18.2262	18.0122	4	4	5	5	4	4	7	5	7	6	6	5	7	7	7	7	7	7	7	7	7
>ENSSSCP00000013787	3	1.38491	0.00167842	C11orf68	none	chromosome 11 open reading frame 68 [Source:HGNC Symbol;Acc:28801]|2|ENSSSCG00000012966|ENSSSCT00000014173	24415	26541.9	23662.7	23405.1	24050.5	33812.5	40237.5	26204.8	35223.6	34291.3	34970.8	31947.3	14.696	14.5303	14.5145	14.5538	15.2963	14.6775	15.1043	15.0656	15.0939	14.9634	1	2	1	2	0	1	3	1	2	3	2	2	3	3	3	3	3	3	3	3	3
>ENSSSCP00000000282	6	1.15988	0.00516739	C12orf10	none	chromosome 12 open reading frame 10 [Source:HGNC Symbol;Acc:17590]|5|ENSSSCG00000000267|ENSSSCT00000000286	93613.9	90790.5	92263.2	97837.6	93564.4	108581	119224	95715.7	101264	110519	113193	111569	16.4703	16.4935	16.5781	16.5137	16.8633	16.5465	16.6278	16.7539	16.7884	16.7676	4	5	3	5	2	2	6	5	7	6	6	3	6	6	6	6	6	6	6	6	6
>ENSSSCP00000006838	9	1.2902	0.0131433	CADM3	none	cell adhesion molecule 3 [Source:HGNC Symbol;Acc:17601]|4|ENSSSCG00000006415|ENSSSCT00000007028	189958	197452	213960	165298	183120	245083	243938	239111	266670	252554	279082	189143	17.5911	17.707	17.3347	17.4824	17.8962	17.8673	18.0247	17.9462	18.0903	17.5291	6	8	5	5	2	3	8	9	9	10	8	8	9	9	9	9	9	9	9	9	9
>ENSSSCP00000008796	12	0.853623	0.00492542	CAPG	none	capping protein (actin filament), gelsolin-like [Source:HGNC Symbol;Acc:1474]|3|ENSSSCG00000008239|ENSSSCT00000009022	5.48013e+06	5.53747e+06	5052482	5788604	5541976	4.67797e+06	4.38325e+06	4.97642e+06	4446360	5.12594e+06	4.35745e+06	4.77838e+06	22.4008	22.2686	22.4648	22.402	22.0636	22.2467	22.0842	22.2894	22.0551	22.1881	12	12	12	12	11	11	12	13	12	12	12	12	12	12	12	12	12	12	12	12	12
>ENSSSCP00000015070	3	0.767903	0.0250705	CAST	none	Sus scrofa calpastatin (CAST), mRNA. [Source:RefSeq mRNA;Acc:NM_214067]|2|ENSSSCG00000014170|ENSSSCT00000015480	115991	126623	95698.9	112197	129446	89070	94473.2	98398.8	90707	83306	85575.2	81959.8	16.9502	16.5462	16.7757	16.982	16.5276	16.5864	16.4689	16.3461	16.3849	16.3226	21	26	24	23	16	18	25	26	22	25	21	25	3	3	3	3	3	3	3	3	3
>ENSSSCP00000014135	17	1.17544	0.00135987	CAT	none	catalase [Source:HGNC Symbol;Acc:1516]|2|ENSSSCG00000013302|ENSSSCT00000014528	424482	415432	427069	439426	416002	498955	511457	461837	532642	532162	500740	454895	18.6643	18.7041	18.7453	18.6662	18.9643	18.817	19.0228	19.0215	18.9337	18.7952	13	17	13	14	13	10	16	17	17	17	16	16	17	17	17	17	17	17	17	17	17
>ENSSSCP00000017622	9	0.757278	0.000169447	CAV1	none	Sus scrofa caveolin 1, caveolae protein, 22kDa (CAV1), mRNA. [Source:RefSeq mRNA;Acc:NM_214438]|18|ENSSSCG00000016634|ENSSSCT00000018112	900945	949571	928224	892541	833444	682266	739426	653504	663113	728942	670503	638106	19.8569	19.8241	19.7676	19.6687	19.496	19.3178	19.3389	19.4754	19.3549	19.2834	9	9	9	9	9	9	9	9	9	9	9	9	9	9	9	9	9	9	9	9	9
>ENSSSCP00000012833	2	0.509068	0.00404156	CBR3	none	carbonyl reductase 3 [Source:HGNC Symbol;Acc:1549]|13|ENSSSCG00000012053|ENSSSCT00000013185	30484.7	35686	29205.7	28495.4	28551.8	15518.8	15722.5	10080.4	11230.1	29648.7	13663.6	12767.3	15.1231	14.834	14.7984	14.8013	13.9405	13.2993	13.4551	14.8557	13.7381	13.6402	0	0	0	0	0	0	2	2	0	1	2	1	2	2	2	2	2	2	2	2	2
>ENSSSCP00000012724	3	1.1548	0.00931459	CD47	none	CD47 molecule [Source:HGNC Symbol;Acc:1682]|13|ENSSSCG00000011942|ENSSSCT00000013068	169585	177723	158564	163207	178848	195838	206994	195170	202352	187164	196274	187075	17.4393	17.2747	17.3163	17.4484	17.6592	17.5744	17.6265	17.5139	17.5825	17.5133	3	3	3	3	3	3	4	3	3	3	3	3	3	3	3	3	3	3	3	3	3
>ENSSSCP00000014507	9	0.918057	0.0478021	CDC37	none	Sus scrofa cell division cycle 37 homolog (S. cerevisiae) (CDC37), mRNA. [Source:RefSeq mRNA;Acc:NM_001123096]|2|ENSSSCG00000013647|ENSSSCT00000014908	2.07661e+06	1.98896e+06	2.24959e+06	2.00711e+06	2.06078e+06	1.90645e+06	1.98844e+06	1.92474e+06	1.88617e+06	1.80892e+06	1815346	2.01507e+06	20.9236	21.1012	20.9367	20.9748	20.9232	20.8762	20.847	20.7867	20.7918	20.9424	9	9	9	9	8	8	9	10	9	9	9	9	9	9	9	9	9	9	9	9	9
>ENSSSCP00000017801	5	0.720792	0.00572778	CDH6	none	cadherin 6, type 2, K-cadherin (fetal kidney) [Source:HGNC Symbol;Acc:1765]|16|ENSSSCG00000016806|ENSSSCT00000018296	59192.4	49868.6	58133.9	61282.9	67484.2	42665.4	40771.3	39124.2	51939.8	45353.8	41192.9	37610.4	15.6058	15.8271	15.9032	16.0423	15.3153	15.2558	15.6646	15.4689	15.3301	15.1988	3	7	3	5	1	3	4	3	3	3	3	1	5	5	5	5	5	5	5	5	5
>ENSSSCP00000013655	3	1.23083	0.00475037	CEND1	none	Sus scrofa cell cycle exit and neuronal differentiation 1 (CEND1), mRNA. [Source:RefSeq mRNA;Acc:NM_213866]|2|ENSSSCG00000012845|ENSSSCT00000014040	64968.3	66944.6	69306.3	58316	65306.4	79965.1	87271.8	76225.9	80689.9	69738.1	77994.7	87870	16.0307	16.0807	15.8316	15.9949	16.4132	16.218	16.3001	16.0897	16.2511	16.4231	2	2	3	2	2	2	2	3	3	3	3	3	3	3	3	3	3	3	3	3	3
>ENSSSCP00000013647	5	0.785842	0.00670036	CHID1	none	chitinase domain containing 1 [Source:HGNC Symbol;Acc:28474]|2|ENSSSCG00000012837|ENSSSCT00000014032	103618	116589	106596	96266.4	95021.8	81427.6	87916.7	79424.8	92447	74040	82856.4	71880.7	16.8311	16.7018	16.5547	16.536	16.4238	16.2773	16.4963	16.176	16.3383	16.1333	2	3	2	3	2	1	5	4	5	3	4	4	5	5	5	5	5	5	5	5	5
>ENSSSCP00000015855	7	0.908493	0.0100945	CHORDC1	none	cysteine and histidine-rich domain (CHORD) containing 1 [Source:HGNC Symbol;Acc:14525]|9|ENSSSCG00000014934|ENSSSCT00000016291	230756	222763	232700	229791	237770	209640	230400	211379	213037	211087	197228	194709	17.7651	17.8281	17.81	17.8592	17.8138	17.6895	17.7007	17.6875	17.5895	17.571	6	7	7	6	4	5	7	7	7	7	7	7	7	7	7	7	7	7	7	7	7
>ENSSSCP00000000178	18	0.903501	2.99808e-05	CKAP4	none	cytoskeleton-associated protein 4 [Source:HGNC Symbol;Acc:16991]|5|ENSSSCG00000000171|ENSSSCT00000000180	4.6496e+06	4.57451e+06	4.74465e+06	4.6493e+06	4629917	4.20091e+06	4.09736e+06	4191919	4.25792e+06	4.2512e+06	4.17486e+06	4232233	22.1252	22.1779	22.1486	22.1426	21.9663	21.9992	22.0217	22.0194	21.9933	22.013	16	16	16	15	15	15	17	17	17	19	15	16	18	18	18	18	18	18	18	18	18
>ENSSSCP00000013617	3	1.19588	0.0278692	CLIC2	none	chloride intracellular channel 2 [Source:HGNC Symbol;Acc:2063]|X|ENSSSCG00000012808|ENSSSCT00000014001	25891.6	30008.3	24488.3	24744.3	24325.6	30963.2	30512.9	31364.1	28638.6	32020.9	27854.5	35388.2	14.8731	14.5798	14.5948	14.5702	14.8971	14.9368	14.8057	14.9667	14.7656	15.111	0	1	1	0	0	0	3	2	0	2	2	1	3	3	3	3	3	3	3	3	3
>ENSSSCP00000010455	17	0.853382	0.000257785	CLIP1	none	CAP-GLY domain containing linker protein 1 [Source:HGNC Symbol;Acc:10461]|14|ENSSSCG00000009793|ENSSSCT00000010735	257981	258775	265337	246792	261019	220156	228940	207827	238009	216088	216615	213457	17.9813	18.0175	17.9129	17.9938	17.8046	17.665	17.8607	17.7213	17.7248	17.7036	9	15	12	12	3	6	12	9	15	13	11	10	17	17	17	17	17	17	17	17	17
>ENSSSCP00000018895	7	0.897295	0.0462453	CLUH	none	clustered mitochondria (cluA/CLU1) homolog [Source:HGNC Symbol;Acc:29094]|12|ENSSSCG00000017835|ENSSSCT00000019410	57593.9	60939.5	59603.3	57225	52607.7	51678.7	44419	51594.9	51925.8	56165.1	53915	52052.5	15.8951	15.8631	15.8044	15.683	15.4389	15.6549	15.6642	15.7774	15.7184	15.6677	2	3	6	2	0	1	6	4	4	4	4	8	7	7	7	7	7	7	7	7	7
>ENSSSCP00000021626	2	0.819928	0.00531578	CNOT4	none	Uncharacterized protein [Source:UniProtKB/TrEMBL;Acc:I3LC53]|18|ENSSSCG00000021354|ENSSSCT00000029334	89702	88072.2	85932.5	99917	84886.2	73549.1	69256.5	83294.3	67797.2	71189.8	71134.7	78622.3	16.4264	16.3909	16.6084	16.3732	16.0797	16.3459	16.0489	16.1194	16.1183	16.2627	2	1	1	1	0	0	2	2	1	1	2	2	2	2	2	2	2	2	2	2	2
>ENSSSCP00000007311	9	0.680761	6.35558e-05	COL11A1	Collagens	collagen, type XI, alpha 1 [Source:HGNC Symbol;Acc:2186]|4|ENSSSCG00000006857|ENSSSCT00000007510	206716	221169	202176	200476	203041	140724	120652	132134	144327	141296	141343	164592	17.7548	17.6253	17.6131	17.6314	16.8805	17.0116	17.139	17.1084	17.1088	17.3285	5	9	7	8	3	3	6	6	7	7	9	5	9	9	9	9	9	9	9	9	9
>ENSSSCP00000004838	40	0.455755	2.32779e-07	COL12A1	Collagens	Uncharacterized protein [Source:UniProtKB/TrEMBL;Acc:F1RQI0]|1|ENSSSCG00000004484|ENSSSCT00000004955	21177839	22875754	20823392	19782740	21229470	9.6519e+06	9441417	10804837	8942438	9283841	9516517	9922376	24.4473	24.3117	24.2377	24.3396	23.1706	23.3652	23.0922	23.1463	23.182	23.2423	40	40	40	40	38	39	39	39	39	38	39	39	40	40	40	40	40	40	40	40	40
>ENSSSCP00000016253	20	0.556603	9.61888e-06	COL1A2	Collagens	Sus scrofa collagen, type I, alpha 2 (COL1A2), mRNA. [Source:RefSeq mRNA;Acc:NM_001243655]|9|ENSSSCG00000015326|ENSSSCT00000016699	2.84369e+06	2907149	2.62468e+06	2.75714e+06	3.08579e+06	1.58281e+06	1.55404e+06	1.98439e+06	1.40854e+06	1.5052e+06	1.5047e+06	1.53998e+06	21.4712	21.3237	21.3947	21.5572	20.5676	20.9203	20.4258	20.5215	20.521	20.5545	53	56	53	58	46	48	44	50	41	47	43	47	20	20	20	20	20	20	20	20	20
>ENSSSCP00000027199	13	0.711272	0.000420201	COL2A1	Collagens	collagen, type II, alpha 1 [Source:HGNC Symbol;Acc:2200]|GL893359.2|ENSSSCG00000025523|ENSSSCT00000031054	462517	449411	464779	463983	471894	328975	275125	323301	352035	356460	363770	303160	18.7777	18.8262	18.8237	18.8481	18.0697	18.3025	18.4254	18.4434	18.4727	18.2097	11	12	10	12	6	10	12	12	13	13	13	11	13	13	13	13	13	13	13	13	13
>ENSSSCP00000018631	3	0.501301	4.83007e-05	COL3A1	Collagens	Uncharacterized protein [Source:UniProtKB/TrEMBL;Acc:F1RT61]|GL896296.2|ENSSSCG00000017579|ENSSSCT00000019137	638072	562386	730728	597494	661680	319866	323351	417858	259265	291243	299992	327490	19.1012	19.479	19.1886	19.3358	18.3027	18.6727	17.9841	18.1519	18.1946	18.3211	7	7	6	9	5	5	5	5	5	5	5	5	3	3	3	3	3	3	3	3	3
>ENSSSCP00000006161	26	0.471789	6.91126e-07	COL5A1	Collagens	collagen, type V, alpha 1 [Source:HGNC Symbol;Acc:2209]|1|ENSSSCG00000005751|ENSSSCT00000006323	2.16816e+06	2.09521e+06	2.39865e+06	2.04541e+06	2.13339e+06	1.02292e+06	908535	1.15901e+06	941552	998884	1.03146e+06	1.09806e+06	20.9987	21.1938	20.964	21.0247	19.7932	20.1445	19.8447	19.93	19.9763	20.0665	40	43	45	41	33	35	34	35	34	36	35	34	26	26	26	26	26	26	26	26	26
>ENSSSCP00000016990	25	0.627625	0.000598639	COL5A2	Collagens	Sus scrofa collagen, type V, alpha 2 (COL5A2), mRNA. [Source:RefSeq mRNA;Acc:NM_001105289]|15|ENSSSCG00000016035|ENSSSCT00000017460	2.12435e+06	2.39787e+06	1.81859e+06	2.07385e+06	2.20708e+06	1.33329e+06	1.05891e+06	1.40048e+06	1.41059e+06	1.3684e+06	1.38272e+06	1.37866e+06	21.1933	20.7944	20.9839	21.0737	20.0141	20.4175	20.4279	20.3841	20.3991	20.3948	24	31	27	28	17	19	20	24	19	22	22	19	25	25	25	25	25	25	25	25	25
>ENSSSCP00000014763	8	0.875517	0.0287868	COLGALT1	none	Glycosyltransferase 25 domain containing 1; Uncharacterized protein [Source:UniProtKB/TrEMBL;Acc:F1S940]|2|ENSSSCG00000013883|ENSSSCT00000015169	121745	135097	114386	116145	121353	106590	112875	109182	108904	97642	102882	108053	17.0436	16.8035	16.8256	16.8888	16.7844	16.7364	16.7327	16.5752	16.6506	16.7214	6	9	7	7	5	5	9	10	9	9	9	9	8	8	8	8	8	8	8	8	8
>ENSSSCP00000014125	6	1.42971	0.00262945	COMMD9	none	COMM domain containing 9 [Source:HGNC Symbol;Acc:25014]|2|ENSSSCG00000013293|ENSSSCT00000014518	34819.2	31093.4	32822.9	34589.9	40770.8	49781.5	58044.2	42966.6	47407.3	48347.8	52100.7	49822.6	14.9243	15.0024	15.0781	15.3152	15.8249	15.3909	15.5328	15.5612	15.669	15.6045	3	3	2	1	1	1	5	3	2	4	6	4	6	6	6	6	6	6	6	6	6
>ENSSSCP00000027288	7	0.866942	0.00122678	COPE	none	Uncharacterized protein [Source:UniProtKB/TrEMBL;Acc:F1S7E0]|2|ENSSSCG00000027840|ENSSSCT00000027115	527965	538097	508185	521285	544294	457716	447270	433506	481324	451131	501555	431507	19.0375	18.955	18.9917	19.054	18.7708	18.7257	18.8766	18.7832	18.936	18.719	10	11	11	11	9	10	11	11	10	13	11	11	7	7	7	7	7	7	7	7	7
>ENSSSCP00000023022	2	1.59833	0.00473787	COPS7B	none	COP9 signalosome subunit 7B [Source:HGNC Symbol;Acc:16760]|15|ENSSSCG00000022392|ENSSSCT00000023412	3526.42	3185.48	3630.85	3745.76	3543.6	5636.38	7144.8	6794.43	4514.48	4481.99	4295.99	6586.61	11.6373	11.8261	11.871	11.791	12.8027	12.7301	12.1403	12.1299	12.0688	12.6853	1	2	1	1	1	0	3	1	1	1	1	2	2	2	2	2	2	2	2	2	2
>ENSSSCP00000000306	5	0.84395	0.0236522	COPZ1	none	coatomer protein complex, subunit zeta 1 [Source:HGNC Symbol;Acc:2243]|5|ENSSSCG00000000290|ENSSSCT00000000311	348208	382758	318509	331631	359933	293870	300660	300102	297072	292721	282331	290331	18.5461	18.281	18.3392	18.4574	18.1978	18.1951	18.1805	18.1592	18.107	18.1473	4	4	4	4	3	4	4	5	4	5	4	3	5	5	5	5	5	5	5	5	5
>ENSSSCP00000023624	2	1.32299	0.0105038	COQ9	none	coenzyme Q9 [Source:HGNC Symbol;Acc:25302]|6|ENSSSCG00000025284|ENSSSCT00000023399	15172	13040.7	17418.7	15162.8	15065.8	20072.4	18979.6	21666.2	18906	16800.7	19215.4	24866.6	13.6707	14.0883	13.8882	13.879	14.2122	14.4032	14.2066	14.0362	14.23	14.6019	2	2	2	2	2	0	2	2	2	2	2	2	2	2	2	2	2	2	2	2	2
>ENSSSCP00000026549	6	1.25822	0.00779337	CORO1A	none	coronin, actin binding protein, 1A [Source:HGNC Symbol;Acc:2252]|GL892962.1|ENSSSCG00000029691|ENSSSCT00000031067	172342	183287	156462	179225	170393	216843	232377	167334	220286	221493	241103	218466	17.4837	17.2554	17.4514	17.3785	17.8261	17.3524	17.749	17.7569	17.8793	17.7371	5	4	4	5	3	5	5	5	7	6	8	6	6	6	6	6	6	6	6	6	6
>ENSSSCP00000005337	8	1.30715	0.0058429	CORO2B	none	coronin, actin binding protein, 2B [Source:HGNC Symbol;Acc:2256]|1|ENSSSCG00000004962|ENSSSCT00000005474	107954	108429	123999	98767.8	100620	141112	155554	143589	140100	125606	150990	130832	16.7264	16.92	16.5918	16.6186	17.2471	17.1316	17.0961	16.9385	17.2041	16.9974	5	5	5	5	0	1	8	6	7	7	7	6	8	8	8	8	8	8	8	8	8
>ENSSSCP00000008483	21	1.06024	0.020707	CORO7	none	Coronin [Source:UniProtKB/TrEMBL;Acc:F1RK53]|3|ENSSSCG00000007944|ENSSSCT00000008707	450445	448190	442555	451008	460027	477581	472973	450481	457278	492810	495063	496881	18.7738	18.7555	18.7828	18.8114	18.8514	18.7811	18.8027	18.9107	18.9173	18.9225	12	15	12	12	9	9	20	17	14	19	20	16	21	21	21	21	21	21	21	21	21
>ENSSSCP00000012290	4	1.16202	0.00349675	CRBN	none	cereblon [Source:HGNC Symbol;Acc:30185]|13|ENSSSCG00000011530|ENSSSCT00000012620	94823.1	92817.3	96065.8	94243.4	96165.7	110186	118530	106963	119198	112675	104812	98939	16.5021	16.5517	16.5241	16.5532	16.8549	16.7068	16.863	16.7818	16.6774	16.5943	2	3	2	3	2	2	4	4	3	4	4	3	4	4	4	4	4	4	4	4	4
>ENSSSCP00000004089	9	1.1992	0.018296	CRYZ	none	Sus scrofa crystallin, zeta (quinone reductase) (LOC733653), mRNA. [Source:RefSeq mRNA;Acc:NM_001044584]|6|ENSSSCG00000003780|ENSSSCT00000004183	249734	241840	248611	281331	227153	299480	346705	264364	302532	309009	286181	288088	17.8837	17.9235	18.1019	17.7933	18.4033	18.0122	18.2067	18.2373	18.1266	18.1361	6	7	7	6	7	5	8	7	8	9	9	9	9	9	9	9	9	9	9	9	9
>ENSSSCP00000019623	4	0.913065	0.00794799	CS	none	citrate synthase [Source:HGNC Symbol;Acc:2422]|5|ENSSSCG00000021091|ENSSSCT00000031652	825366	810939	813732	819446	857347	753613	739276	706000	824930	728458	774740	748274	19.6292	19.6342	19.6443	19.7095	19.4958	19.4293	19.6539	19.4745	19.5634	19.5132	3	5	3	4	3	3	4	5	3	3	4	4	4	4	4	4	4	4	4	4	4
>ENSSSCP00000007202	26	0.863527	0.00284497	CSDE1	none	cold shock domain containing E1, RNA-binding [Source:HGNC Symbol;Acc:29905]|4|ENSSSCG00000006752|ENSSSCT00000007397	1.11848e+06	1.07137e+06	1.13389e+06	1.18956e+06	1.07909e+06	965835	867347	973280	979469	1.0059e+06	1005943	963067	20.031	20.1128	20.182	20.0414	19.7262	19.8925	19.9016	19.9401	19.9401	19.8773	21	25	23	23	21	20	26	25	25	25	27	23	26	26	26	26	26	26	26	26	26
>ENSSSCP00000002078	10	1.10684	0.0235864	CSK	none	c-src tyrosine kinase [Source:HGNC Symbol;Acc:2444]|7|ENSSSCG00000001900|ENSSSCT00000002128	212831	218131	199054	217320	216819	235571	254307	238006	241989	206434	236285	236403	17.7348	17.6028	17.7295	17.7261	17.9562	17.8606	17.8846	17.6553	17.8502	17.8509	8	8	8	8	3	4	11	8	9	8	9	8	10	10	10	10	10	10	10	10	10
>ENSSSCP00000020759	3	0.789488	0.037037	CST3	ECM Regulators	Sus scrofa cystatin C (CST3), mRNA. [Source:RefSeq mRNA;Acc:NM_001044602]|17|ENSSSCG00000029889|ENSSSCT00000027339	574154	482694	573222	627733	612964	453287	389547	428525	378110	626542	396673	500328	18.8808	19.1287	19.2598	19.2254	18.5714	18.709	18.5284	19.2571	18.5976	18.9325	2	3	3	3	2	1	2	3	2	3	3	3	3	3	3	3	3	3	3	3	3
>ENSSSCP00000006461	4	0.306977	5.69561e-06	CTHRC1	ECM Glycoproteins	Uncharacterized protein [Source:UniProtKB/TrEMBL;Acc:F1S1D2]|4|ENSSSCG00000006051|ENSSSCT00000006640	102696	104694	83112.5	111057	111923	31525.4	26585.1	40099.9	30882.7	32791.2	28990.7	29803.1	16.6758	16.3428	16.7609	16.7721	14.6983	15.2913	14.9145	15.001	14.8233	14.8632	6	7	7	8	4	4	3	3	3	3	3	1	4	4	4	4	4	4	4	4	4
>ENSSSCP00000005246	5	1.23373	0.0267748	CYB5A	none	Sus scrofa cytochrome b5 type A (microsomal) (CYB5A), mRNA. [Source:RefSeq mRNA;Acc:NM_001001770]|1|ENSSSCG00000004875|ENSSSCT00000005381	1.11977e+06	1.03784e+06	1.28681e+06	1.16593e+06	988525	1.3815e+06	1441599	1.33374e+06	1.31465e+06	1.35457e+06	1.24874e+06	1.59568e+06	19.9851	20.2954	20.1531	19.9149	20.4592	20.347	20.3263	20.3694	20.252	20.6057	4	5	4	4	4	4	5	5	5	5	5	5	5	5	5	5	5	5	5	5	5
>ENSSSCP00000021526	3	0.717645	0.0101597	CYP1B1	none	Uncharacterized protein [Source:UniProtKB/TrEMBL;Acc:I3LBV4]|GL893411.2|ENSSSCG00000030456|ENSSSCT00000025308	52182.9	60143.4	46396	45308.4	56884	37448.8	38213.5	41112.4	41071.9	27744.3	34952.2	41598.8	15.8761	15.5017	15.4675	15.7957	15.2218	15.3273	15.3259	14.7599	15.0931	15.3443	3	4	4	4	4	4	5	5	4	3	4	3	3	3	3	3	3	3	3	3	3
>ENSSSCP00000016238	5	0.852511	0.0280969	CYP51A1	none	Sus scrofa cytochrome P450, family 51, subfamily A, polypeptide 1 (CYP51), mRNA. [Source:RefSeq mRNA;Acc:NM_214432]|9|ENSSSCG00000015311|ENSSSCT00000016684	147694	154749	137560	135628	162840	125911	128818	140876	119078	111178	127770	127747	17.2396	17.0697	17.0493	17.3131	16.975	17.1041	16.8615	16.7625	16.9632	16.9629	5	9	8	6	4	6	9	8	6	7	9	9	5	5	5	5	5	5	5	5	5
>ENSSSCP00000024373	2	1.18531	0.0146242	DCDC2C	none	Uncharacterized protein [Source:UniProtKB/TrEMBL;Acc:I3LJW1]|11|ENSSSCG00000030111|ENSSSCT00000024366	462937	463737	461908	505588	420516	548723	520026	538507	556601	549856	568275	559071	18.8229	18.8172	18.9476	18.6818	18.9882	19.0386	19.0863	19.0687	19.1162	19.0927	2	2	1	1	1	2	2	2	2	2	2	2	2	2	2	2	2	2	2	2	2
>ENSSSCP00000019227	6	1.13906	0.0423397	DCLK1	none	Uncharacterized protein [Source:UniProtKB/TrEMBL;Acc:I3L5C8]|11|ENSSSCG00000029956|ENSSSCT00000028625	1.18331e+06	1.26548e+06	1.06731e+06	1.22752e+06	1.17293e+06	1.34786e+06	1.38702e+06	1.23372e+06	1.48873e+06	1.40732e+06	1.40151e+06	1.16886e+06	20.2713	20.0255	20.2273	20.1617	20.4036	20.2346	20.5056	20.4245	20.4185	20.1567	6	6	6	6	6	6	6	6	6	6	6	6	6	6	6	6	6	6	6	6	6
>ENSSSCP00000016152	7	1.21721	0.0153625	DCPS	none	Sus scrofa decapping enzyme, scavenger (DCPS), mRNA. [Source:RefSeq mRNA;Acc:NM_213790]|9|ENSSSCG00000015231|ENSSSCT00000016597	108074	104209	95708.2	118187	114193	131549	140336	124392	120789	143171	127685	132923	16.6691	16.5464	16.8507	16.8011	17.0985	16.9245	16.8821	17.1274	16.9622	17.0202	6	8	7	6	3	5	8	7	7	7	7	7	7	7	7	7	7	7	7	7	7
>ENSSSCP00000000108	30	0.93036	0.00245867	DDX17	none	DEAD (Asp-Glu-Ala-Asp) box helicase 17 [Source:HGNC Symbol;Acc:2740]|5|ENSSSCG00000000104|ENSSSCT00000000110	4.01151e+06	4079648	3.95596e+06	4031807	3.97863e+06	3.73215e+06	3.73836e+06	3731625	3.96663e+06	3.56448e+06	3.69452e+06	3.69729e+06	21.96	21.9156	21.943	21.9238	21.834	21.8314	21.9195	21.7653	21.817	21.818	25	29	26	26	26	24	28	29	27	27	28	26	30	30	30	30	30	30	30	30	30
>ENSSSCP00000010925	18	0.796593	0.00329208	DDX21	none	DEAD (Asp-Glu-Ala-Asp) box helicase 21 [Source:HGNC Symbol;Acc:2744]|14|ENSSSCG00000010247|ENSSSCT00000011217	560415	587112	541918	509132	603500	446423	452937	497879	418966	387255	447367	474132	19.1633	19.0477	18.9577	19.203	18.789	18.9254	18.6765	18.5629	18.7711	18.8549	15	18	18	17	15	12	20	18	13	18	17	19	18	18	18	18	18	18	18	18	18
>ENSSSCP00000000387	3	0.677553	0.006241	DGKA	none	Sus scrofa diacylglycerol kinase, alpha 80kDa (DGKA), mRNA. [Source:RefSeq mRNA;Acc:NM_214032]|5|ENSSSCG00000000370|ENSSSCT00000000393	52279.5	59367.3	48956.4	45499.5	55294.7	35422.1	35555.6	37501	35384.2	34361.7	34702.1	35028	15.8574	15.5792	15.4736	15.7549	15.1178	15.1946	15.1108	15.0685	15.0827	15.0962	3	3	2	4	1	2	2	3	2	2	3	3	3	3	3	3	3	3	3	3	3
>ENSSSCP00000015954	14	0.885649	0.00370441	DLAT	none	Sus scrofa dihydrolipoamide S-acetyltransferase (DLAT), nuclear gene encoding mitochondrial protein, mRNA. [Source:RefSeq mRNA;Acc:NM_213994]|9|ENSSSCG00000015030|ENSSSCT00000016395	756081	797832	734294	732307	759889	669622	663343	687091	713895	615602	694737	643063	19.6057	19.486	19.4821	19.5354	19.3394	19.3901	19.4454	19.2316	19.4061	19.2946	11	12	11	13	9	11	13	11	12	11	13	12	14	14	14	14	14	14	14	14	14
>ENSSSCP00000002572	15	0.933505	0.0326857	DLST	none	Sus scrofa dihydrolipoamide S-succinyltransferase (E2 component of 2-oxo-glutarate complex) (DLST), nuclear gene encoding mitochondrial protein, mRNA. [Source:RefSeq mRNA;Acc:NM_214397]|7|ENSSSCG00000002374|ENSSSCT00000002639	1.10683e+06	1.09021e+06	1.08541e+06	1.1259e+06	1.1258e+06	1.03323e+06	1.0085e+06	1.02901e+06	1.13933e+06	1023749	1.04758e+06	951218	20.0562	20.0498	20.1026	20.1025	19.9438	19.9728	20.1198	19.9654	19.9986	19.8594	13	15	15	14	13	11	15	15	14	15	14	15	15	15	15	15	15	15	15	15	15
>ENSSSCP00000001916	2	0.141074	0.00353632	DNAJA4	none	Sus scrofa DnaJ (Hsp40) homolog, subfamily A, member 4 (DNAJA4), mRNA. [Source:RefSeq mRNA;Acc:NM_214339]|7|ENSSSCG00000001759|ENSSSCT00000001965	32963.4	62374.6	23605.1	22120.7	23753.4	4650.27	5709.96	3854.92	4953.73	4844.26	4675.85	3862.92	15.9287	14.5268	14.4331	14.5358	12.4793	11.9125	12.2743	12.2421	12.191	11.9155	0	0	0	0	1	0	3	1	1	0	1	1	2	2	2	2	2	2	2	2	2
>ENSSSCP00000004074	10	1.13865	0.00303377	DNAJB4	none	DnaJ (Hsp40) homolog, subfamily B, member 4 [Source:HGNC Symbol;Acc:14886]|6|ENSSSCG00000003766|ENSSSCT00000004168	208419	210034	214655	208203	200785	237316	261318	227806	239597	246028	231221	217928	17.6803	17.7117	17.6676	17.6153	17.9954	17.7974	17.8702	17.9085	17.8189	17.7335	7	9	6	5	4	3	9	8	9	8	9	9	10	10	10	10	10	10	10	10	10
>ENSSSCP00000017183	14	1.23774	0.0248482	DNPEP	none	aspartyl aminopeptidase [Source:HGNC Symbol;Acc:2981]|15|ENSSSCG00000016220|ENSSSCT00000017661	564861	648383	530105	495134	585823	699149	816181	672611	719234	649519	698583	638766	19.3065	19.0159	18.9175	19.1601	19.6385	19.3594	19.4561	19.309	19.4141	19.2849	8	9	8	9	10	7	13	11	12	10	12	11	14	14	14	14	14	14	14	14	14
>ENSSSCP00000027633	2	0.859252	0.0251277	DPP7	none	dipeptidyl-peptidase 7 [Source:HGNC Symbol;Acc:14892]|GL896476.1|ENSSSCG00000027350|ENSSSCT00000030975	36539.4	37083.1	37614.7	32340.4	39119.4	31396.6	32864	28810.9	32200.1	30703.5	34025.7	29775.2	15.1785	15.199	14.9811	15.2556	15.0042	14.8143	14.9748	14.9061	15.0543	14.8618	2	2	1	2	2	1	2	1	1	2	2	2	2	2	2	2	2	2	2	2	2
>ENSSSCP00000001627	70	0.884686	0.00272237	DST	none	dystonin [Source:HGNC Symbol;Acc:1090]|7|ENSSSCG00000001499|ENSSSCT00000001671	1.07161e+06	1.04233e+06	1.11575e+06	1.10112e+06	1.02726e+06	948040	918357	962587	917097	942593	919355	1.02825e+06	19.9914	20.0896	20.0705	19.9704	19.8087	19.8766	19.8067	19.8463	19.8103	19.9718	46	64	58	48	10	21	61	57	47	63	56	57	70	70	70	70	70	70	70	70	70
>ENSSSCP00000023026	2	1.52342	1.67414e-05	DTNA	none	|6|ENSSSCG00000029762|ENSSSCT00000032134	6393.57	6464.74	6408.88	6318.16	6382.49	9740.1	9197.74	9467.79	9435.17	10595.4	9140.12	10604.4	12.6584	12.6459	12.6253	12.6399	13.1671	13.2088	13.2038	13.3711	13.158	13.3724	0	2	2	1	0	0	1	2	2	2	1	1	2	2	2	2	2	2	2	2	2
>ENSSSCP00000011981	16	1.12464	0.0116562	DYNC1LI1	none	dynein, cytoplasmic 1, light intermediate chain 1 [Source:HGNC Symbol;Acc:18745]|13|ENSSSCG00000011233|ENSSSCT00000012300	313035	325685	296266	305751	324438	352052	391275	364969	328071	333281	338318	356395	18.3131	18.1765	18.222	18.3076	18.5778	18.4774	18.3236	18.3464	18.368	18.4431	7	10	9	10	4	4	14	13	10	12	13	10	16	16	16	16	16	16	16	16	16
>ENSSSCP00000003813	5	1.261	0.00622214	ECE1	none	endothelin converting enzyme 1 [Source:HGNC Symbol;Acc:3146]|6|ENSSSCG00000003513|ENSSSCT00000003903	32307.5	32903.8	33627.9	30589	32109.5	40739.8	44445.9	34600.7	44964.4	44552.6	41665.2	34210	15.006	15.0374	14.9007	14.9707	15.4398	15.0785	15.4565	15.4432	15.3466	15.0621	0	3	0	0	0	0	6	1	5	6	4	2	5	5	5	5	5	5	5	5	5
>ENSSSCP00000002082	2	0.854791	0.00558073	EDC3	none	enhancer of mRNA decapping 3 [Source:HGNC Symbol;Acc:26114]|7|ENSSSCG00000001903|ENSSSCT00000002132	23812.7	22426.3	23463.2	25868.1	23493.1	20354.9	19923.3	19999.6	20807.9	20351	18638.1	22409.3	14.4529	14.5181	14.6589	14.52	14.2822	14.2877	14.3448	14.3128	14.186	14.4518	3	2	3	2	1	2	2	2	2	2	2	2	2	2	2	2	2	2	2	2	2
>ENSSSCP00000004843	21	0.960887	0.0259997	EEF1A1	none	Sus scrofa eukaryotic translation elongation factor 1 alpha 1 (EEF1A1), mRNA. [Source:RefSeq mRNA;Acc:NM_001097418]|1|ENSSSCG00000004489|ENSSSCT00000004960	96488796	96176288	96125360	94967016	98686520	92714852	94516808	94802336	90115064	90268984	96269920	90316000	26.5192	26.5184	26.5009	26.5563	26.4941	26.4984	26.4253	26.4277	26.5206	26.4285	23	27	27	26	26	25	26	25	25	26	26	26	21	21	21	21	21	21	21	21	21
>ENSSSCP00000007416	2	0.82915	0.000528433	EEF1D	none	Uncharacterized protein [Source:UniProtKB/TrEMBL;Acc:F1SEV8]|4|ENSSSCG00000006954|ENSSSCT00000007619	772105	786625	800490	777199	724108	640191	602807	670325	661972	688478	589682	627882	19.5853	19.6105	19.5679	19.4658	19.2013	19.3545	19.3364	19.3931	19.1696	19.2601	14	13	14	15	13	13	15	15	14	15	13	13	2	2	2	2	2	2	2	2	2
>ENSSSCP00000010182	2	0.894821	0.0191638	EFNB2	none	ephrin-B2 [Source:HGNC Symbol;Acc:3227]|11|ENSSSCG00000009535|ENSSSCT00000010453	79603.1	77159.8	81626.3	83228.5	76397.6	71230.5	64724.6	74831.5	70859.9	76602.2	75945.9	64418.7	16.2356	16.3167	16.3448	16.2212	15.982	16.1914	16.1127	16.2251	16.2127	15.9752	2	2	2	2	2	2	1	2	2	2	2	1	2	2	2	2	2	2	2	2	2
>ENSSSCP00000013842	19	0.932678	0.0443476	EHD1	none	EH-domain containing 1 [Source:HGNC Symbol;Acc:3242]|2|ENSSSCG00000013017|ENSSSCT00000014228	890610	935117	865809	865868	895648	830652	883282	891224	823246	771076	818393	796693	19.8348	19.7237	19.7238	19.7726	19.7525	19.7654	19.651	19.5565	19.6424	19.6037	15	18	15	17	8	10	19	18	20	17	18	16	19	19	19	19	19	19	19	19	19
>ENSSSCP00000020066	2	1.28647	0.0366087	EHD3	none	EH-domain containing 3 [Source:HGNC Symbol;Acc:3244]|JH118557.1|ENSSSCG00000024943|ENSSSCT00000024629	13366.7	13435.8	15205	10624.6	14201.4	17195.9	18241.6	16401.8	14963.3	18756	17971.7	16840.8	13.7138	13.8923	13.3751	13.7937	14.1549	14.0016	13.8691	14.1951	14.1334	14.0397	10	8	7	10	7	6	12	10	8	8	13	8	2	2	2	2	2	2	2	2	2
>ENSSSCP00000019731	7	1.28701	0.0074435	EIF2AK2	none	eukaryotic translation initiation factor 2-alpha kinase 2 [Source:HGNC Symbol;Acc:9437]|3|ENSSSCG00000025181|ENSSSCT00000028150	202936	186406	206477	212567	206293	261180	312302	241259	216266	230961	295200	271090	17.5081	17.6556	17.6976	17.6543	18.2526	17.8802	17.7224	17.8173	18.1713	18.0484	5	6	6	6	3	6	8	6	6	7	8	5	7	7	7	7	7	7	7	7	7
>ENSSSCP00000023652	21	0.911862	0.00609369	EIF2S1	none	eukaryotic translation initiation factor 2, subunit 1 alpha, 35kDa [Source:HGNC Symbol;Acc:3265]|7|ENSSSCG00000027990|ENSSSCT00000030998	1.95452e+06	2.02682e+06	1.97253e+06	1909827	1.9089e+06	1.78225e+06	1.7651e+06	1.74058e+06	1.91845e+06	1673634	1.86163e+06	1.73411e+06	20.9508	20.9116	20.865	20.8643	20.7513	20.7311	20.8715	20.6746	20.8281	20.7258	21	21	21	21	20	21	20	20	20	21	21	21	21	21	21	21	21	21	21	21	21
>ENSSSCP00000014524	10	0.931214	0.0205259	EIF3G	none	eukaryotic translation initiation factor 3, subunit G [Source:HGNC Symbol;Acc:3274]|2|ENSSSCG00000013661|ENSSSCT00000014925	1.00939e+06	965445	1.04868e+06	994070	1.02938e+06	939962	898331	965312	938916	957448	948054	931712	19.8808	20.0001	19.923	19.9733	19.7769	19.8806	19.8406	19.8688	19.8546	19.8295	8	11	9	8	6	7	10	10	10	10	9	10	10	10	10	10	10	10	10	10	10
>ENSSSCP00000006426	14	0.948874	0.00457203	EIF3H	none	eukaryotic translation initiation factor 3, subunit H [Source:HGNC Symbol;Acc:3273]|4|ENSSSCG00000006016|ENSSSCT00000006602	690895	681262	694690	692639	694989	655572	663140	655733	668042	620803	654724	670993	19.3778	19.406	19.4017	19.4066	19.339	19.3227	19.3496	19.2438	19.3205	19.3559	12	13	11	13	10	9	14	14	13	14	12	13	14	14	14	14	14	14	14	14	14
>ENSSSCP00000014147	15	0.921287	0.0443074	EIF3M	none	eukaryotic translation initiation factor 3, subunit M [Source:HGNC Symbol;Acc:24460]|2|ENSSSCG00000013315|ENSSSCT00000014541	667165	682160	699017	651981	635500	614650	595103	645071	603166	573553	685280	585726	19.3798	19.415	19.3145	19.2775	19.1828	19.2991	19.2022	19.1296	19.3863	19.1599	13	14	14	14	8	11	15	15	15	14	13	14	15	15	15	15	15	15	15	15	15
>ENSSSCP00000019023	4	0.814492	0.013219	EIF4A1	none	Sus scrofa eukaryotic translation initiation factor 4A1 (EIF4A1), mRNA. [Source:RefSeq mRNA;Acc:NM_001100196]|12|ENSSSCG00000017957|ENSSSCT00000019541	1e+06	1.03971e+06	869271	1.07003e+06	1.021e+06	814496	808093	783063	830851	903720	750799	810451	19.9878	19.7294	20.0292	19.9616	19.6242	19.5788	19.6642	19.7855	19.5181	19.6284	23	25	24	25	24	23	26	25	24	25	25	25	4	4	4	4	4	4	4	4	4
>ENSSSCP00000018966	4	1.16339	0.0409724	ENO3	none	enolase 3 (beta, muscle) [Source:HGNC Symbol;Acc:3354]|12|ENSSSCG00000017904|ENSSSCT00000019484	2.77947e+07	25525300	31252896	26815104	27585590	3.23361e+07	30114646	31197928	28656710	33700328	38613876	31733144	24.6054	24.8975	24.6765	24.7174	24.844	24.8949	24.7724	25.0063	25.2026	24.9195	10	11	10	11	10	10	11	10	10	11	10	11	4	4	4	4	4	4	4	4	4
>ENSSSCP00000001870	2	1.31146	0.041616	ENPP5	none	ectonucleotide pyrophosphatase/phosphodiesterase 5 (putative) [Source:HGNC Symbol;Acc:13717]|7|ENSSSCG00000001715|ENSSSCT00000001917	20990.2	17389.1	18487.2	25125.9	22958.8	27527.9	28486.8	27681.2	28683.4	30071	26394	23851.1	14.0859	14.1742	14.6169	14.4868	14.798	14.7566	14.8079	14.8761	14.6879	14.5418	1	1	2	1	0	1	3	1	1	3	1	1	2	2	2	2	2	2	2	2	2
>ENSSSCP00000003828	9	1.13045	0.00615791	EPHB2	none	EPH receptor B2 [Source:HGNC Symbol;Acc:3393]|6|ENSSSCG00000003527|ENSSSCT00000003918	142673	152005	143134	139879	135674	161284	153611	155861	165780	161983	172788	157682	17.2138	17.127	17.0938	17.0498	17.2289	17.2499	17.3389	17.3055	17.3986	17.2667	10	9	9	9	5	5	11	11	12	11	12	13	9	9	9	9	9	9	9	9	9
>ENSSSCP00000011571	16	1.18098	0.0162845	EPHX1	none	Sus scrofa epoxide hydrolase 1, microsomal (xenobiotic) (EPHX1), mRNA. [Source:RefSeq mRNA;Acc:NM_214355]|10|ENSSSCG00000010853|ENSSSCT00000011875	2.6605e+06	2.93539e+06	2.55851e+06	2.42684e+06	2.72125e+06	3.14199e+06	3.01224e+06	3.15391e+06	3.44821e+06	2928883	3.32061e+06	2.98808e+06	21.4851	21.2869	21.2106	21.3758	21.5224	21.5887	21.7174	21.4819	21.663	21.5108	14	15	14	15	14	15	16	18	17	16	16	15	16	16	16	16	16	16	16	16	16
>ENSSSCP00000014731	12	0.933362	0.018637	EPS15L1	none	epidermal growth factor receptor pathway substrate 15-like 1 [Source:HGNC Symbol;Acc:24634]|2|ENSSSCG00000013857|ENSSSCT00000015136	128376	127525	130422	123592	131963	119821	115338	116010	120493	126580	114267	126239	16.9604	16.9928	16.9152	17.0098	16.8155	16.8239	16.8786	16.9497	16.802	16.9458	8	11	10	10	6	4	11	12	10	13	12	10	12	12	12	12	12	12	12	12	12
>ENSSSCP00000016773	6	1.15223	0.0220723	ERLIN2	none	ER lipid raft associated 2 [Source:HGNC Symbol;Acc:1356]|15|ENSSSCG00000015827|ENSSSCT00000017235	120715	126824	125119	122293	108624	139092	156203	144862	137013	125961	142764	127749	16.9525	16.9329	16.9	16.729	17.2531	17.1443	17.064	16.9426	17.1233	16.9629	8	8	7	7	7	3	10	8	9	8	8	8	6	6	6	6	6	6	6	6	6
>ENSSSCP00000000399	34	0.866172	0.0439024	ESYT1	none	extended synaptotagmin-like protein 1 [Source:HGNC Symbol;Acc:29534]|5|ENSSSCG00000000379|ENSSSCT00000000405	1.85483e+06	1.99027e+06	1.78707e+06	1.6552e+06	1.98678e+06	1.6066e+06	1.64923e+06	1.86991e+06	1.56141e+06	1.42732e+06	1.52075e+06	1.61099e+06	20.9245	20.7692	20.6586	20.922	20.6534	20.8345	20.5744	20.4449	20.5364	20.6195	32	32	31	33	26	23	32	35	33	33	32	33	34	34	34	34	34	34	34	34	34
>ENSSSCP00000022354	5	0.629558	6.51486e-05	F3	none	coagulation factor III (thromboplastin, tissue factor) [Source:HGNC Symbol;Acc:3541]|4|ENSSSCG00000022447|ENSSSCT00000027504	662479	667015	684391	640385	658126	417069	361738	401039	431670	377750	443249	486968	19.3474	19.3845	19.2886	19.328	18.4646	18.6134	18.7196	18.5271	18.7578	18.8935	5	5	5	5	5	5	5	5	5	5	5	5	5	5	5	5	5	5	5	5	5
>ENSSSCP00000006014	24	0.77767	0.0123875	FAM129B	none	family with sequence similarity 129, member B [Source:HGNC Symbol;Acc:25282]|1|ENSSSCG00000005614|ENSSSCT00000006173	1.76012e+06	1.97291e+06	1.63364e+06	1.56595e+06	1.86796e+06	1.36879e+06	1.44984e+06	1.47868e+06	1.34054e+06	1.2476e+06	1.36674e+06	1.32934e+06	20.9119	20.6397	20.5786	20.833	20.4675	20.4959	20.3544	20.2507	20.3823	20.3423	23	23	23	24	21	20	24	23	22	22	23	22	24	24	24	24	24	24	24	24	24
>ENSSSCP00000017170	4	0.623161	0.0226351	FAM134A	none	family with sequence similarity 134, member A [Source:HGNC Symbol;Acc:28450]|15|ENSSSCG00000016207|ENSSSCT00000017648	203753	180256	220346	208018	206390	126971	152012	95177.9	86189.7	194350	69704.7	164390	17.4597	17.7494	17.6664	17.655	17.2138	16.5383	16.3952	17.5683	16.089	17.3268	2	1	1	3	1	2	3	3	1	3	2	2	4	4	4	4	4	4	4	4	4
>ENSSSCP00000014969	9	1.18461	0.00805462	FAM169A	none	family with sequence similarity 169, member A [Source:HGNC Symbol;Acc:29138]|2|ENSSSCG00000014076|ENSSSCT00000015377	270028	260635	298051	260686	260740	319879	321589	319380	299031	323851	317666	337755	17.9917	18.1852	17.992	17.9923	18.2949	18.2849	18.1899	18.305	18.2772	18.3656	6	11	9	9	4	8	11	10	9	10	10	9	9	9	9	9	9	9	9	9	9
>ENSSSCP00000017600	3	0.845553	0.0239232	FAM3C	none	family with sequence similarity 3, member C [Source:HGNC Symbol;Acc:18664]|18|ENSSSCG00000016616|ENSSSCT00000018090	54755	49573.4	58566.9	54737.5	56142.1	46298.2	47122.6	50982.3	47786.5	36235.4	50061.3	45601.3	15.5973	15.8378	15.7402	15.7768	15.5241	15.6377	15.5443	15.1451	15.6114	15.4768	2	4	1	2	2	1	3	2	2	3	1	2	3	3	3	3	3	3	3	3	3
>ENSSSCP00000002993	2	0.733184	0.00450083	FAM65A	none	family with sequence similarity 65, member A [Source:HGNC Symbol;Acc:25836]|6|ENSSSCG00000002774|ENSSSCT00000003072	12706.2	13214.2	10842.1	13275.6	13492.9	9315.99	8471.15	9650.11	9242.4	9399.86	10106.3	9026.09	13.6898	13.4044	13.6965	13.7199	13.0483	13.2363	13.1741	13.1984	13.303	13.1399	2	1	1	1	0	0	1	2	1	0	2	2	2	2	2	2	2	2	2	2	2
>ENSSSCP00000006776	3	1.207	0.00690382	FCER1G	none	Sus scrofa Fc fragment of IgE, high affinity I, receptor for; gamma polypeptide (FCER1G), mRNA. [Source:RefSeq mRNA;Acc:NM_001001265]|4|ENSSSCG00000006357|ENSSSCT00000006966	75615.5	72574	75212.6	78302.4	76373.2	91268.2	101064	80371.9	95383	83339.5	102942	84507.9	16.1472	16.1987	16.2568	16.2208	16.6249	16.2944	16.5414	16.3467	16.6515	16.3668	2	2	2	2	2	2	3	3	2	3	2	2	3	3	3	3	3	3	3	3	3
>ENSSSCP00000022970	2	1.54109	0.00181542	FDFT1	none	farnesyl-diphosphate farnesyltransferase 1 [Source:HGNC Symbol;Acc:3629]|14|ENSSSCG00000026044|ENSSSCT00000024166	13567.5	11729.9	15403.4	12956.1	14180.8	20908.8	20362	18982.9	20696.9	20172.3	22828.1	22410.7	13.5179	13.911	13.6613	13.7917	14.3136	14.2124	14.3371	14.3001	14.4785	14.4519	2	0	0	0	0	0	1	2	1	1	2	3	2	2	2	2	2	2	2	2	2
>ENSSSCP00000009695	3	1.26134	0.0169473	FGF2	Secreted Factors	fibroblast growth factor 2 (basic) [Source:HGNC Symbol;Acc:3676]|8|ENSSSCG00000009086|ENSSSCT00000009952	117230	126771	98968.6	126165	117016	147867	135627	166133	138164	163249	141034	142993	16.9519	16.5947	16.9449	16.8363	17.0493	17.342	17.076	17.3167	17.1057	17.1256	2	2	3	2	2	2	3	3	3	3	2	3	3	3	3	3	3	3	3	3	3
>ENSSSCP00000018463	10	0.810266	0.000399776	FKBP10	none	FK506 binding protein 10, 65 kDa [Source:HGNC Symbol;Acc:18169]|12|ENSSSCG00000017422|ENSSSCT00000018968	1.59492e+06	1.63222e+06	1.48037e+06	1.63439e+06	1.63268e+06	1.29231e+06	1.29444e+06	1.4041e+06	1.3293e+06	1.21362e+06	1.32429e+06	1.18809e+06	20.6384	20.4975	20.6403	20.6388	20.3039	20.4212	20.3422	20.2109	20.3368	20.1802	10	10	10	11	9	8	10	10	11	9	10	10	10	10	10	10	10	10	10	10	10
>ENSSSCP00000000187	6	0.800389	0.045184	FKBP11	none	FK506 binding protein 11, 19 kDa [Source:HGNC Symbol;Acc:18624]|5|ENSSSCG00000000180|ENSSSCT00000000189	677340	773640	601905	589479	744337	542136	522717	543210	616806	490064	547393	532624	19.5613	19.1992	19.1691	19.5056	18.9957	19.0512	19.2345	18.9026	19.0622	19.0228	4	5	6	6	4	5	6	6	4	5	6	5	6	6	6	6	6	6	6	6	6
>ENSSSCP00000000791	25	0.83377	0.00957215	FKBP4	none	FK506 binding protein 4, 59kDa [Source:HGNC Symbol;Acc:3720]|5|ENSSSCG00000000743|ENSSSCT00000000807	1.52782e+06	1.39805e+06	1637112	1602093	1.47402e+06	1.27385e+06	1210338	1.22962e+06	1.33705e+06	1.33229e+06	1.26255e+06	1.27126e+06	20.415	20.6427	20.6115	20.4913	20.207	20.2298	20.3506	20.3455	20.2679	20.2778	21	26	21	22	14	17	26	23	22	24	23	22	25	25	25	25	25	25	25	25	25
>ENSSSCP00000026826	11	0.892123	0.00610828	FKBP9	none	FK506 binding protein 9, 63 kDa [Source:HGNC Symbol;Acc:3725]|18|ENSSSCG00000021250|ENSSSCT00000029905	683003	723285	671236	683266	654226	609323	602836	638787	597219	591384	607848	617865	19.4642	19.3565	19.3821	19.3194	19.2014	19.285	19.1879	19.1737	19.2134	19.2369	11	13	11	11	8	8	10	10	11	11	10	10	11	11	11	11	11	11	11	11	11
>ENSSSCP00000012224	30	0.864047	0.000635023	FLNB	none	filamin B, beta [Source:HGNC Symbol;Acc:3755]|13|ENSSSCG00000011471|ENSSSCT00000012553	6.25679e+06	6.47028e+06	6.03205e+06	6.3812e+06	6.14364e+06	5.40616e+06	5.27458e+06	5.94383e+06	5473643	5.07656e+06	5.36115e+06	5307212	22.6254	22.5242	22.6054	22.5507	22.3306	22.503	22.3841	22.2754	22.3541	22.3395	30	30	30	30	28	28	30	30	30	30	30	29	30	30	30	30	30	30	30	30	30
>ENSSSCP00000017562	132	0.865604	0.00403059	FLNC	none	filamin C, gamma [Source:HGNC Symbol;Acc:3756]|18|ENSSSCG00000016578|ENSSSCT00000018048	82296310	88228752	78725984	82022704	80207800	7.1236e+07	67556560	74112504	71488128	72418808	73073784	68766328	26.3947	26.2303	26.2895	26.2572	26.0096	26.1432	26.0912	26.1099	26.1229	26.0352	129	127	132	124	128	128	127	128	132	133	132	130	132	132	132	132	132	132	132	132	132
>ENSSSCP00000017132	68	0.462973	4.81585e-06	FN1	ECM Glycoproteins	fibronectin 1 [Source:HGNC Symbol;Acc:3778]|15|ENSSSCG00000016174|ENSSSCT00000017610	6.35549e+06	6.25765e+06	6.4824e+06	6849416	5832484	2.94242e+06	3.05473e+06	3.00164e+06	2.40735e+06	3296067	3.39592e+06	2.49882e+06	22.5772	22.6281	22.7075	22.4757	21.5426	21.5173	21.199	21.6523	21.6954	21.2528	68	83	79	74	61	55	61	62	53	60	70	47	68	68	68	68	68	68	68	68	68
>ENSSSCP00000006095	7	1.16636	0.0233551	FNBP1	none	formin binding protein 1 [Source:HGNC Symbol;Acc:17069]|1|ENSSSCG00000005689|ENSSSCT00000006256	64041.3	58568.8	71476.2	62245.4	63874.7	74695.1	70095.9	79528.8	79440	75750.4	75569	67786.2	15.8378	16.1252	15.9257	15.963	16.097	16.2792	16.2776	16.209	16.2055	16.0487	3	5	6	3	1	2	7	5	4	6	6	5	7	7	7	7	7	7	7	7	7
>ENSSSCP00000012523	2	0.523904	0.000642988	FNDC3B	none	Uncharacterized protein [Source:UniProtKB/TrEMBL;Acc:F1SH12]|13|ENSSSCG00000011752|ENSSSCT00000012863	39931.5	35808.4	38218.2	50121.7	35577.7	20920.3	20848.2	21045.8	22837.8	15726.8	23895.6	21167.3	15.128	15.222	15.6131	15.1187	14.3476	14.3612	14.4791	13.9409	14.5445	14.3696	1	2	1	2	0	0	0	1	0	0	2	1	2	2	2	2	2	2	2	2	2
>ENSSSCP00000015730	4	1.16411	0.034806	FOLR2	none	folate receptor 2 [Source:RefSeq peptide;Acc:NP_999018]|9|ENSSSCG00000014812|ENSSSCT00000016163	55683.2	54748.4	55527.6	51167.1	61289.6	64821.1	73346.2	68742.8	66243.4	58750.1	67531.6	54312.7	15.7405	15.7609	15.6429	15.9034	16.1624	16.0689	16.0155	15.8423	16.0433	15.729	2	3	2	2	0	2	3	4	3	3	4	2	4	4	4	4	4	4	4	4	4
>ENSSSCP00000006109	8	0.859762	0.0109951	FUBP3	none	far upstream element (FUSE) binding protein 3 [Source:HGNC Symbol;Acc:4005]|1|ENSSSCG00000005702|ENSSSCT00000006271	264795	251706	253401	281321	272753	227661	201402	242161	255676	237589	220186	208952	17.9414	17.9511	18.1019	18.0572	17.6197	17.8856	17.964	17.8581	17.7484	17.6728	5	10	7	7	2	3	7	8	5	8	7	6	8	8	8	8	8	8	8	8	8
>ENSSSCP00000031028	5	0.889886	0.0487549	FUS	none	FUS; Uncharacterized protein [Source:UniProtKB/TrEMBL;Acc:G8ENL4]|3|ENSSSCG00000030798|ENSSSCT00000036326	584137	528240	624931	590027	593349	519815	451237	517778	544108	588198	507290	510280	19.0108	19.2533	19.1704	19.1785	18.7835	18.982	19.0535	19.1659	18.9525	18.9609	3	5	4	4	3	3	4	4	4	5	5	4	5	5	5	5	5	5	5	5	5
>ENSSSCP00000018226	14	0.917693	0.00376649	GALK1	none	galactokinase 1 [Source:HGNC Symbol;Acc:4118]|12|ENSSSCG00000017203|ENSSSCT00000018728	863514	865877	835461	880782	871934	792440	798313	770774	827690	767421	752471	837973	19.7238	19.6722	19.7484	19.7339	19.6066	19.5559	19.6587	19.5497	19.5213	19.6765	13	14	13	12	10	10	14	14	13	14	13	14	14	14	14	14	14	14	14	14	14
>ENSSSCP00000005011	4	1.14972	0.0432471	GALK2	none	galactokinase 2 [Source:HGNC Symbol;Acc:4119]|1|ENSSSCG00000004651|ENSSSCT00000005136	120959	136751	110569	120057	116458	139068	152032	133224	142345	137662	134883	134262	17.0612	16.7546	16.8734	16.8295	17.214	17.0235	17.119	17.0708	17.0414	17.0347	3	4	3	4	3	2	4	4	3	5	4	3	4	4	4	4	4	4	4	4	4
>ENSSSCP00000004051	10	0.816243	0.0059046	GALNT1	none	UDP-N-acetyl-alpha-D-galactosamine:polypeptide N-acetylgalactosaminyltransferase 1 (GalNAc-T1) [Source:HGNC Symbol;Acc:4123]|6|ENSSSCG00000003743|ENSSSCT00000004144	190776	194276	193468	176478	198883	155720	152406	172104	166387	130248	172620	140554	17.5677	17.5617	17.4291	17.6016	17.2176	17.3929	17.3442	16.9909	17.3972	17.1008	7	9	6	8	5	4	8	8	8	6	9	7	10	10	10	10	10	10	10	10	10
>ENSSSCP00000006950	10	1.24196	0.00661882	GBA	none	Sus scrofa glucosidase, beta, acid (GBA), mRNA. [Source:RefSeq mRNA;Acc:NM_001005730]|4|ENSSSCG00000006522|ENSSSCT00000007143	562412	632804	527050	528270	561524	698495	741350	702342	706673	706034	747143	587425	19.2714	19.0076	19.0109	19.099	19.4998	19.4218	19.4307	19.4294	19.511	19.164	11	10	10	10	9	8	11	10	10	10	10	11	10	10	10	10	10	10	10	10	10
>ENSSSCP00000007381	16	1.44551	0.00344577	GBP1	none	Sus scrofa guanylate binding protein 1, interferon-inducible (GBP1), mRNA. [Source:RefSeq mRNA;Acc:NM_001128473]|4|ENSSSCG00000006924|ENSSSCT00000007584	622791	682642	600535	540397	667590	900251	1.17284e+06	736164	840475	808394	1.01055e+06	833082	19.3808	19.1959	19.0437	19.3486	20.1616	19.4897	19.6808	19.6247	19.9467	19.6681	16	15	15	16	11	15	20	17	18	18	20	18	16	16	16	16	16	16	16	16	16
>ENSSSCP00000010591	3	1.18548	0.00219129	GIT2	none	Uncharacterized protein [Source:UniProtKB/TrEMBL;Acc:F1RIT6]|14|ENSSSCG00000009925|ENSSSCT00000010876	49532.4	47661.3	50138.8	52605.3	47724	58719.8	63347.1	59672.8	54141.8	59548.2	53081.2	62527.9	15.5405	15.6136	15.6829	15.5424	15.951	15.8648	15.7245	15.8618	15.6959	15.9322	3	2	3	1	0	1	5	4	4	5	4	5	3	3	3	3	3	3	3	3	3
>ENSSSCP00000004580	5	0.712299	0.0110766	GJA1	none	gap junction protein, alpha 1, 43kDa [Source:HGNC Symbol;Acc:4274]|1|ENSSSCG00000004241|ENSSSCT00000004688	125973	103209	146408	120546	133728	89730.3	98165.7	114729	87677.9	77232.7	85594.3	74981.9	16.6552	17.1596	16.8792	17.0289	16.5829	16.8079	16.4199	16.2369	16.3852	16.1943	4	5	5	5	1	0	4	5	4	4	6	3	5	5	5	5	5	5	5	5	5
>ENSSSCP00000004992	7	0.64538	0.00303711	GLDN	ECM Glycoproteins	gliomedin [Source:HGNC Symbol;Acc:29514]|1|ENSSSCG00000004632|ENSSSCT00000005116	335049	363741	370519	308197	297741	216234	168677	173247	250708	241165	282918	180690	18.4726	18.4992	18.2335	18.1837	17.3639	17.4025	17.9356	17.8797	18.11	17.4632	6	7	6	7	4	7	5	4	5	7	5	4	7	7	7	7	7	7	7	7	7
>ENSSSCP00000006915	2	1.5129	0.00103488	GLMP	none	chromosome 1 open reading frame 85 [Source:HGNC Symbol;Acc:29436]|4|ENSSSCG00000006488|ENSSSCT00000007107	12204.5	12641	11679.1	11766.3	12731.7	18464.2	16549.6	21471.6	14435.8	21114.6	20270	16943.5	13.6258	13.5116	13.5224	13.6361	14.0145	14.3901	13.8174	14.366	14.3071	14.0484	1	1	1	1	0	0	2	1	2	1	2	1	2	2	2	2	2	2	2	2	2
>ENSSSCP00000017009	8	0.770132	0.00152738	GLS	none	glutaminase [Source:HGNC Symbol;Acc:4331]|15|ENSSSCG00000016056|ENSSSCT00000017481	240965	223050	249481	229252	262076	185575	196631	184882	190809	165714	187706	187705	17.767	17.9286	17.8066	17.9996	17.5851	17.4962	17.5418	17.3383	17.5181	17.5181	8	8	8	10	8	6	8	9	9	7	10	7	8	8	8	8	8	8	8	8	8
>ENSSSCP00000001135	4	1.27908	0.0363758	GMPR	none	guanosine monophosphate reductase [Source:HGNC Symbol;Acc:4376]|7|ENSSSCG00000001064|ENSSSCT00000001159	24307.7	23484	25187.8	26325.2	22233.6	31091.5	32540.7	21025.4	31611.2	34779.1	36996.5	29596.3	14.5194	14.6204	14.6842	14.4405	14.99	14.3598	14.9481	15.0859	15.1751	14.8531	0	2	2	0	1	1	4	2	3	3	3	4	4	4	4	4	4	4	4	4	4
>ENSSSCP00000018290	3	1.18465	0.00667575	GNA13	none	guanine nucleotide binding protein (G protein), alpha 13 [Source:HGNC Symbol;Acc:4381]|12|ENSSSCG00000017263|ENSSSCT00000018792	61698.6	64500.8	57684.6	62776.1	61832.9	73091.5	77403	65685.1	76469.6	72950	81576.5	64464.9	15.977	15.8159	15.9379	15.9161	16.2401	16.0033	16.2226	16.1546	16.3159	15.9762	1	2	1	1	1	1	4	4	3	4	3	3	3	3	3	3	3	3	3	3	3
>ENSSSCP00000005677	6	1.09995	0.00966568	GNAQ	none	guanine nucleotide binding protein (G protein), q polypeptide [Source:HGNC Symbol;Acc:4390]|GL895864.2|ENSSSCG00000005285|ENSSSCT00000005821	256803	270566	247728	251157	257762	282470	288348	275498	304741	274518	285943	265774	18.0456	17.9184	17.9382	17.9757	18.1375	18.0717	18.2172	18.0665	18.1254	18.0198	3	6	5	5	4	4	6	6	6	6	6	6	6	6	6	6	6	6	6	6	6
>ENSSSCP00000002656	2	0.251991	0.0293056	GOLGA5	none	golgin A5 [Source:HGNC Symbol;Acc:4428]|7|ENSSSCG00000002455|ENSSSCT00000002725	112935	241499	46452.5	91469.6	72319.7	28458.7	48816.3	29356.8	15383.8	26353.6	26338.2	24503.5	17.8817	15.5035	16.481	16.1421	15.5751	14.8414	13.9091	14.6857	14.6849	14.5807	0	1	0	1	0	0	0	0	0	1	1	2	2	2	2	2	2	2	2	2	2
>ENSSSCP00000012664	3	1.14318	0.0267867	GSK3B	none	Sus scrofa glycogen synthase kinase 3 beta (GSK3B), mRNA. [Source:RefSeq mRNA;Acc:NM_001128443]|13|ENSSSCG00000011889|ENSSSCT00000013006	146234	150655	148402	136355	149522	167171	168061	203142	158554	158248	158585	156434	17.2009	17.1791	17.057	17.19	17.3586	17.6321	17.2746	17.2718	17.2749	17.2552	11	11	11	11	10	10	11	10	11	11	11	11	3	3	3	3	3	3	3	3	3
>ENSSSCP00000007277	2	1.30111	0.0187111	GSTM4	none	Uncharacterized protein [Source:UniProtKB/TrEMBL;Acc:F1S604]|4|ENSSSCG00000006822|ENSSSCT00000007473	6018.66	5971.21	6813.8	5659.67	5629.97	7830.97	10342.8	6742.84	6535.49	8174.98	6803.85	8385.8	12.5438	12.7342	12.4665	12.4589	13.3363	12.7191	12.6741	12.997	12.7321	13.0337	0	2	2	2	0	0	3	1	2	1	2	1	2	2	2	2	2	2	2	2	2
>ENSSSCP00000013714	11	1.23301	0.00668515	GSTP1	none	Uncharacterized protein [Source:UniProtKB/TrEMBL;Acc:F1RVN0]|2|ENSSSCG00000012897|ENSSSCT00000014100	2.5002e+07	22608798	27008856	26256508	24133800	3.08277e+07	31158512	26810736	31244104	35698748	30218344	29835994	24.4304	24.6869	24.6462	24.5246	24.8931	24.6763	24.8971	25.0894	24.8489	24.8306	9	9	8	10	8	8	9	8	9	11	11	10	11	11	11	11	11	11	11	11	11
>ENSSSCP00000010737	3	1.17455	0.015397	GSTT1	none	glutathione S-transferase theta 1 [Source:HGNC Symbol;Acc:4641]|14|ENSSSCG00000010064|ENSSSCT00000011025	131011	142801	122965	121917	136360	153879	167352	141903	158814	155847	158523	140835	17.1236	16.9079	16.8955	17.0571	17.3525	17.1145	17.277	17.2498	17.2743	17.1036	3	3	3	3	3	2	3	3	3	3	3	3	3	3	3	3	3	3	3	3	3
>ENSSSCP00000008265	17	1.10465	0.0222023	GUSB	none	Sus scrofa glucuronidase, beta (GUSB), mRNA. [Source:RefSeq mRNA;Acc:NM_001123121]|3|ENSSSCG00000007739|ENSSSCT00000008484	660790	688812	621141	662136	671069	729941	744559	701454	719528	727095	816189	670821	19.3938	19.2446	19.3368	19.3561	19.506	19.42	19.4567	19.4718	19.6385	19.3556	15	18	14	13	13	8	17	16	17	17	17	16	17	17	17	17	17	17	17	17	17
>ENSSSCP00000012468	12	1.09743	0.0153938	GYG1	none	glycogenin 1 [Source:HGNC Symbol;Acc:4699]|13|ENSSSCG00000011698|ENSSSCT00000012806	1.44415e+07	14611974	14196448	14366108	14591568	1.58485e+07	15038046	15182400	16416703	16285195	17386820	14782025	23.8006	23.759	23.7762	23.7986	23.8421	23.8559	23.9687	23.9571	24.0515	23.8173	10	13	11	13	10	10	12	12	12	12	12	10	12	12	12	12	12	12	12	12	12
>ENSSSCP00000017353	43	0.791531	3.92721e-07	HDLBP	none	high density lipoprotein binding protein [Source:HGNC Symbol;Acc:4857]|15|ENSSSCG00000016379|ENSSSCT00000017834	3.16657e+06	3.10551e+06	3.2491e+06	3.1516e+06	3.16005e+06	2.50644e+06	2.49011e+06	2.6008e+06	2.59875e+06	2.4119e+06	2.4663e+06	2.47074e+06	21.5664	21.6316	21.5877	21.5915	21.2478	21.3105	21.3094	21.2017	21.2339	21.2365	41	42	40	43	27	35	41	43	40	39	40	39	43	43	43	43	43	43	43	43	43
>ENSSSCP00000014965	9	1.21904	0.0296685	HEXB	none	Sus scrofa hexosaminidase B (beta polypeptide) (HEXB), mRNA. [Source:RefSeq mRNA;Acc:NM_213921]|2|ENSSSCG00000014073|ENSSSCT00000015373	252930	281246	232350	225242	272880	308331	349683	321059	306039	282937	329279	260990	18.1015	17.8259	17.7811	18.0579	18.4157	18.2925	18.2234	18.1101	18.3289	17.9936	6	7	9	6	5	4	8	7	7	10	8	10	9	9	9	9	9	9	9	9	9
>ENSSSCP00000017003	2	1.17548	0.0278895	HIBCH	none	3-hydroxyisobutyryl-CoA hydrolase [Source:HGNC Symbol;Acc:4908]|15|ENSSSCG00000016049|ENSSSCT00000017474	23354.3	25752.3	21609.6	21564.8	24490.6	27452.6	28635.2	26734.9	30206.7	23889.9	26071.9	29176.6	14.6524	14.3994	14.3964	14.5799	14.8055	14.7064	14.8826	14.5441	14.6702	14.8325	0	0	0	1	0	0	2	1	0	1	1	1	2	2	2	2	2	2	2	2	2
>ENSSSCP00000008224	15	0.876736	0.040105	HIP1	none	huntingtin interacting protein 1 [Source:HGNC Symbol;Acc:4913]|3|ENSSSCG00000007700|ENSSSCT00000008443	990697	1.08625e+06	964077	895198	1.01727e+06	868580	773220	921369	844835	902621	894886	874550	20.0509	19.8788	19.7718	19.9563	19.5605	19.8134	19.6883	19.7838	19.7713	19.7382	15	16	13	13	9	8	16	13	14	14	15	14	15	15	15	15	15	15	15	15	15
>ENSSSCP00000001575	6	1.56257	0.00635473	HLA-DQB1	none	Sus scrofa SLA-DQ beta1 domain (SLA-DQB1), mRNA. [Source:RefSeq mRNA;Acc:NM_001113694]|7|ENSSSCG00000001457|ENSSSCT00000001617	130886	128078	103980	134681	156807	204519	229761	142704	177619	224894	220526	231611	16.9667	16.6659	17.0392	17.2586	17.8098	17.1227	17.4384	17.7789	17.7506	17.8213	4	3	3	4	1	5	6	6	7	7	6	7	6	6	6	6	6	6	6	6	6
>ENSSSCP00000001567	3	1.72435	0.00141895	HLA-DRA	none	Sus scrofa MHC class II DR-alpha (SLA-DRA), mRNA. [Source:RefSeq mRNA;Acc:NM_001113706]|7|ENSSSCG00000001453|ENSSSCT00000001609	73218.4	69837.8	62188.6	79392.8	81454.2	126254	141430	82653.5	111174	129240	148428	144598	16.0917	15.9244	16.2767	16.3137	17.1097	16.3348	16.7625	16.9797	17.1794	17.1417	1	1	1	2	1	1	3	1	2	3	3	2	3	3	3	3	3	3	3	3	3
>ENSSSCP00000001570	2	1.59273	0.000844316	HLA-DRB1	none	Sus scrofa MHC class II histocompatibility antigen SLA-DRB1 (SLA-DRB1), mRNA. [Source:RefSeq mRNA;Acc:NM_001113695]|7|ENSSSCG00000001455|ENSSSCT00000001612	37886.2	37000.1	33315.8	40696.7	40532.1	60342.3	68888	42638.3	56065.4	63146.9	67093.4	64222.1	15.1752	15.0239	15.3126	15.3068	16.072	15.3799	15.7748	15.9464	16.0339	15.9708	5	4	5	5	3	5	6	5	5	5	6	6	2	2	2	2	2	2	2	2	2
>ENSSSCP00000020168	7	1.36343	0.0038637	HNMT	none	histamine N-methyltransferase [Source:HGNC Symbol;Acc:5028]|15|ENSSSCG00000024023|ENSSSCT00000023632	163963	153101	161153	151678	189921	223553	266131	178369	211201	229216	235351	221049	17.2241	17.2981	17.2107	17.535	18.0218	17.4445	17.6883	17.8063	17.8445	17.754	4	4	5	5	2	3	8	3	6	7	7	7	7	7	7	7	7	7	7	7	7
>ENSSSCP00000015235	9	0.848597	0.00108793	HNRNPA0	none	heterogeneous nuclear ribonucleoprotein A0 [Source:HGNC Symbol;Acc:5030]|2|ENSSSCG00000014322|ENSSSCT00000015648	517327	505571	490621	538405	534709	439002	397130	426576	455286	458197	435693	461127	18.9476	18.9042	19.0383	19.0284	18.5993	18.7024	18.7964	18.8056	18.733	18.8148	8	9	8	7	4	5	8	9	9	9	9	9	9	9	9	9	9	9	9	9	9
>ENSSSCP00000000304	12	0.856809	0.0324223	HNRNPA1	none	Sus scrofa heterogeneous nuclear ribonucleoprotein A1 (HNRNPA1), mRNA. [Source:RefSeq mRNA;Acc:NM_001077218]|5|ENSSSCG00000000288|ENSSSCT00000000309	7121351	7640051	6.30597e+06	7240152	7.29923e+06	6.10164e+06	5202090	6.33241e+06	5.70627e+06	6.95771e+06	5808680	6602672	22.8652	22.5883	22.7876	22.7993	22.3107	22.5943	22.4441	22.7302	22.4698	22.6546	15	15	15	14	14	14	15	19	16	15	15	15	12	12	12	12	12	12	12	12	12
>ENSSSCP00000016940	11	0.909499	0.00443053	HNRNPA3	none	heterogeneous nuclear ribonucleoprotein A3 [Source:HGNC Symbol;Acc:24941]|15|ENSSSCG00000015988|ENSSSCT00000017409	2.36853e+06	2.34491e+06	2.3187e+06	2.35868e+06	2.45184e+06	2.15418e+06	2.00759e+06	2.19292e+06	2156965	2.31832e+06	2063301	2.18598e+06	21.1611	21.1449	21.1696	21.2254	20.937	21.0644	21.0406	21.1446	20.9765	21.0598	10	10	10	9	8	10	10	10	11	10	11	11	11	11	11	11	11	11	11	11	11
>ENSSSCP00000014919	4	0.921004	0.0206453	HNRNPAB	none	heterogeneous nuclear ribonucleoprotein A/B [Source:HGNC Symbol;Acc:5034]|2|ENSSSCG00000014031|ENSSSCT00000015327	1173363	1195279	1.17719e+06	1.12509e+06	1.19589e+06	1.08067e+06	993372	1.0313e+06	1.06361e+06	1.12529e+06	1.175e+06	1.09546e+06	20.1889	20.1669	20.1016	20.1897	19.922	19.976	20.0205	20.1019	20.1642	20.0631	4	4	4	4	4	4	4	4	4	4	4	4	4	4	4	4	4	4	4	4	4
>ENSSSCP00000009863	4	0.928372	0.0385916	HNRNPD	none	heterogeneous nuclear ribonucleoprotein D (AU-rich element RNA binding protein 1, 37kDa) [Source:HGNC Symbol;Acc:5036]|8|ENSSSCG00000009249|ENSSSCT00000010129	1.54206e+06	1467313	1.53821e+06	1.57463e+06	1.58809e+06	1.4316e+06	1.33046e+06	1.40015e+06	1.48136e+06	1.5818e+06	1.41529e+06	1.38058e+06	20.4847	20.5528	20.5866	20.5989	20.3435	20.4171	20.4985	20.5931	20.4327	20.3968	4	4	4	4	4	4	4	4	4	4	4	4	4	4	4	4	4	4	4	4	4
>ENSSSCP00000019399	3	0.885508	0.0236818	HOOK3	none	hook microtubule-tethering protein 3 [Source:HGNC Symbol;Acc:23576]|GL894782.1|ENSSSCG00000024486|ENSSSCT00000031247	44317.3	44489.9	43181.8	41476	48121.5	39243.3	39121.2	34781.7	39598.3	42021.3	37965.1	41972.1	15.4412	15.3981	15.34	15.5544	15.2557	15.086	15.2732	15.3588	15.2124	15.3571	3	4	4	3	1	2	3	3	3	3	3	3	3	3	3	3	3	3	3	3	3
>ENSSSCP00000003396	8	1.24011	0.000321514	HSD17B14	none	hydroxysteroid (17-beta) dehydrogenase 14 [Source:HGNC Symbol;Acc:23238]|6|ENSSSCG00000003138|ENSSSCT00000003479	473004	477995	449631	479135	485256	586579	589947	520225	633597	628795	576453	570457	18.8666	18.7784	18.8701	18.8884	19.1702	18.9888	19.2732	19.2622	19.1368	19.1218	7	5	5	6	6	6	8	9	8	8	7	6	8	8	8	8	8	8	8	8	8
>ENSSSCP00000022446	17	1.12177	0.0167818	HSD17B4	none	hydroxysteroid (17-beta) dehydrogenase 4 [Source:HGNC Symbol;Acc:5213]|2|ENSSSCG00000028431|ENSSSCT00000025027	991932	1.02457e+06	947522	983805	1.01183e+06	1.11272e+06	1.10419e+06	1.05849e+06	1.23529e+06	1.11821e+06	1.17445e+06	985703	19.9666	19.8538	19.908	19.9485	20.0746	20.0136	20.2364	20.0928	20.1636	19.9108	14	16	14	15	13	12	17	17	17	17	17	17	17	17	17	17	17	17	17	17	17
>ENSSSCP00000001854	34	0.85849	0.0010863	HSP90AB1	none	Sus scrofa heat shock 90kD protein 1, beta (HSPCB), mRNA. [Source:RefSeq mRNA;Acc:NM_001244433]|7|ENSSSCG00000001701|ENSSSCT00000001901	3.37579e+07	35572060	32966144	32273258	34220312	28980868	28835326	29199288	30184546	26602310	29036104	30027634	25.0842	24.9745	24.9438	25.0283	24.7813	24.7994	24.8473	24.665	24.7913	24.8398	37	36	36	36	34	35	36	36	36	36	37	36	34	34	34	34	34	34	34	34	34
>ENSSSCP00000000906	33	0.888677	0.0103515	HSP90B1	none	heat shock protein 90kDa beta (Grp94), member 1 [Source:HGNC Symbol;Acc:12028]|5|ENSSSCG00000000849|ENSSSCT00000000926	1.38625e+07	13504758	14125134	13777835	14042444	12319316	12179374	10997827	13667813	12491559	12906330	11672993	23.687	23.7518	23.7158	23.7433	23.5379	23.3907	23.7043	23.5745	23.6216	23.4767	33	33	32	33	30	29	33	32	33	33	33	33	33	33	33	33	33	33	33	33	33
>ENSSSCP00000020097	24	0.918411	0.0309326	HSPA1B	none	Sus scrofa heat shock protein 70.2 (HSP70.2), mRNA. [Source:RefSeq mRNA;Acc:NM_213766]|GL896522.1|ENSSSCG00000030368|ENSSSCT00000032249	1.06359e+07	11292013	10201540	10826953	10223059	9.76812e+06	9747683	9292264	10227045	9882106	9723817	9735814	23.4288	23.2823	23.3681	23.2853	23.2166	23.1476	23.2859	23.2364	23.2131	23.2149	23	23	23	21	21	21	22	22	23	24	24	23	24	24	24	24	24	24	24	24	24
>ENSSSCP00000002468	8	1.10674	0.0134478	HSPA2	none	heat shock 70kDa protein 2 [Source:HGNC Symbol;Acc:5235]|7|ENSSSCG00000002274|ENSSSCT00000002532	250612	267586	247981	247130	239753	277363	285414	263641	284411	282441	275916	272352	18.0296	17.9199	17.9149	17.8712	18.1227	18.0082	18.1176	18.1076	18.0739	18.0551	19	19	20	18	16	16	20	19	20	19	21	18	8	8	8	8	8	8	8	8	8
>ENSSSCP00000006000	32	0.836037	0.00555037	HSPA5	none	heat shock 70kDa protein 5 (glucose-regulated protein, 78kDa) [Source:HGNC Symbol;Acc:5238]|1|ENSSSCG00000005601|ENSSSCT00000006159	41855158	40448804	43073428	43465952	40432448	3.49925e+07	32588952	30848892	39533096	37565072	37288008	32130724	25.2696	25.3603	25.3734	25.269	24.9579	24.8787	25.2366	25.1629	25.1522	24.9375	30	32	30	31	27	26	31	31	31	31	30	30	32	32	32	32	32	32	32	32	32
>ENSSSCP00000015252	33	0.871613	0.0138751	HSPA9	none	Stress-70 protein, mitochondrial; Uncharacterized protein [Source:UniProtKB/TrEMBL;Acc:F1RGJ3]|2|ENSSSCG00000014338|ENSSSCT00000015665	7377772	7007015	7.65326e+06	6.95733e+06	7893488	6.43056e+06	6417196	6340369	7233457	6.12903e+06	6.54822e+06	5.91511e+06	22.7404	22.8676	22.7301	22.9122	22.6135	22.5961	22.7863	22.5472	22.6427	22.496	31	32	31	32	27	26	29	29	30	32	32	30	33	33	33	33	33	33	33	33	33
>ENSSSCP00000003814	8	0.83645	0.0449534	HSPG2	Proteoglycans	Uncharacterized protein [Source:UniProtKB/TrEMBL;Acc:F1SU03]|6|ENSSSCG00000003514|ENSSSCT00000003904	188315	208028	181295	199292	164645	157516	130634	161767	197210	146262	159217	150008	17.6664	17.468	17.6045	17.329	16.9952	17.3036	17.5894	17.1582	17.2806	17.1947	10	14	14	7	4	4	7	6	3	7	8	5	8	8	8	8	8	8	8	8	8
>ENSSSCP00000022058	18	1.19475	0.00604357	IDH1	none	isocitrate dehydrogenase 1 (NADP+), soluble [Source:HGNC Symbol;Acc:5382]|15|ENSSSCG00000023264|ENSSSCT00000026412	1.4191e+06	1.56735e+06	1.36543e+06	1.34475e+06	1398863	1.69547e+06	1.92069e+06	1.61731e+06	1.67873e+06	1.59453e+06	1.71099e+06	1.65057e+06	20.5799	20.3809	20.3589	20.4158	20.8732	20.6252	20.6789	20.6047	20.7064	20.6545	16	16	16	17	14	14	18	18	18	18	18	17	18	18	18	18	18	18	18	18	18
>ENSSSCP00000025683	8	1.21319	0.000463371	IDI1	none	Uncharacterized protein [Source:UniProtKB/TrEMBL;Acc:I3LDY2]|10|ENSSSCG00000029066|ENSSSCT00000024912	640122	642884	599867	663107	654631	776587	776155	783246	720752	790352	733271	855746	19.2942	19.1943	19.3389	19.3203	19.566	19.5791	19.4591	19.5921	19.484	19.7068	6	6	6	6	5	6	7	7	7	7	8	7	8	8	8	8	8	8	8	8	8
>ENSSSCP00000004071	3	1.66741	0.00929301	IFI44	none	interferon-induced protein 44 [Source:HGNC Symbol;Acc:16938]|6|ENSSSCG00000003763|ENSSSCT00000004165	36691.5	35163.3	36197.2	32454.7	42950.7	61179.8	80731.1	51356.7	49257.8	44422.5	90682.6	50628.1	15.1018	15.1436	14.9861	15.3904	16.3008	15.6483	15.5881	15.439	16.4685	15.6277	1	3	3	1	1	2	4	4	3	3	4	4	3	3	3	3	3	3	3	3	3
>ENSSSCP00000025283	6	1.51516	0.00903906	IFI44L	none	interferon-induced protein 44-like [Source:HGNC Symbol;Acc:17817]|6|ENSSSCG00000027660|ENSSSCT00000029270	80695.2	78886.4	81989.8	73014.9	88889.5	122266	154397	99375.8	103613	93301.2	167019	115889	16.2675	16.3232	16.1559	16.4397	17.2363	16.6006	16.6608	16.5096	17.3497	16.8224	2	3	2	3	0	1	6	4	4	3	7	5	6	6	6	6	6	6	6	6	6
>ENSSSCP00000004370	13	0.517005	0.0436507	IGF2R	none	Sus scrofa insulin-like growth factor 2 receptor (IGF2R), mRNA. [Source:RefSeq mRNA;Acc:NM_001244473]|1|ENSSSCG00000004044|ENSSSCT00000004472	153146	127954	113666	249180	121786	79177.4	74168.5	78161.4	86319.7	76666.1	76499.5	83249.3	16.9653	16.7944	17.9268	16.894	16.1785	16.2542	16.3974	16.2263	16.2232	16.3451	8	11	9	14	4	7	8	7	7	12	10	9	13	13	13	13	13	13	13	13	13
>ENSSSCP00000009507	6	0.38433	5.50621e-07	IGFBP7	ECM Glycoproteins	insulin-like growth factor binding protein 7 [Source:HGNC Symbol;Acc:5476]|8|ENSSSCG00000008913|ENSSSCT00000009759	133142	133965	123346	126141	149116	51170.5	49395.3	60805.8	44627.6	43961.1	53040.7	55192.6	17.0315	16.9124	16.9447	17.1861	15.5921	15.8919	15.4456	15.4239	15.6948	15.7522	6	7	8	7	4	4	4	5	3	2	4	3	6	6	6	6	6	6	6	6	6
>ENSSSCP00000007492	2	1.31288	0.0253033	IKBKB	none	inhibitor of kappa light polypeptide gene enhancer in B-cells, kinase beta [Source:HGNC Symbol;Acc:5960]|17|ENSSSCG00000007030|ENSSSCT00000007699	23285.9	21644.5	23809.1	25016.9	22673.2	30571.7	40557	27448.9	28932.2	34922.6	28918.3	22651.1	14.4017	14.5392	14.6106	14.4687	15.3077	14.7445	14.8204	15.0919	14.8197	14.4673	0	0	1	2	0	0	2	1	3	2	2	1	2	2	2	2	2	2	2	2	2
>ENSSSCP00000014703	13	1.15576	0.0399781	ILVBL	none	ilvB (bacterial acetolactate synthase)-like [Source:HGNC Symbol;Acc:6041]|2|ENSSSCG00000013830|ENSSSCT00000015108	262260	283129	281811	235891	248208	303110	310978	317227	305574	273674	314349	296859	18.1111	18.1044	17.8478	17.9212	18.2465	18.2752	18.2212	18.0621	18.262	18.1794	8	8	5	10	4	5	12	13	11	10	10	11	13	13	13	13	13	13	13	13	13
>ENSSSCP00000003447	4	1.19214	0.0379213	IRF3	none	Sus scrofa interferon regulatory factor 3 (IRF3), mRNA. [Source:RefSeq mRNA;Acc:NM_213770]|6|ENSSSCG00000003178|ENSSSCT00000003530	80657.7	92597.2	76384.3	81942	71707.2	96155.2	95812.1	102481	85957.9	94148.8	100025	98505.8	16.4987	16.221	16.3223	16.1298	16.5479	16.645	16.3913	16.5227	16.61	16.5879	2	3	4	4	3	3	5	4	2	4	5	4	4	4	4	4	4	4	4	4	4
>ENSSSCP00000021524	2	1.0864	0.0497339	IST1	none	Uncharacterized protein [Source:UniProtKB/TrEMBL;Acc:I3LBV2]|JH118898.1|ENSSSCG00000022587|ENSSSCT00000024143	38467.6	38147.3	37575	36801.2	41346.9	41791.1	43934.9	45521.2	42014.5	39630.6	39559.4	40085.8	15.2193	15.1975	15.1675	15.3355	15.4231	15.4742	15.3586	15.2743	15.2717	15.2908	2	2	2	2	2	2	2	3	3	2	2	2	2	2	2	2	2	2	2	2	2
>ENSSSCP00000000308	19	0.714266	0.00355463	ITGA5	none	Uncharacterized protein [Source:UniProtKB/TrEMBL;Acc:F1SR53]|5|ENSSSCG00000000293|ENSSSCT00000000314	1.10175e+06	960214	1.09216e+06	1.18543e+06	1.16921e+06	786944	793279	839676	798906	747131	782566	760106	19.873	20.0587	20.177	20.1571	19.5975	19.6795	19.6077	19.511	19.5779	19.5358	18	22	21	21	17	16	20	23	19	19	22	21	19	19	19	19	19	19	19	19	19
>ENSSSCP00000011782	3	0.704182	0.0101912	ITGA8	none	integrin, alpha 8 [Source:HGNC Symbol;Acc:6144]|10|ENSSSCG00000011046|ENSSSCT00000012090	92671	108318	85446.3	77078.4	99841.2	65257.2	67818.3	83812.8	58272	65491.2	52993.8	63155.2	16.7249	16.3827	16.234	16.6073	16.0494	16.3549	15.8305	15.999	15.6935	15.9466	2	4	4	3	5	1	3	3	2	3	4	2	3	3	3	3	3	3	3	3	3
>ENSSSCP00000021995	4	0.693114	0.000269442	ITGAL	none	Uncharacterized protein [Source:UniProtKB/TrEMBL;Acc:I3LD66]|GL894598.2|ENSSSCG00000027764|ENSSSCT00000029241	135612	146042	121159	137623	137622	93994.4	87716.8	92684.5	104493	89525.3	108108	81439	17.156	16.8865	17.0704	17.0704	16.4206	16.5	16.673	16.45	16.7221	16.3134	4	4	4	4	3	4	4	4	4	4	4	4	4	4	4	4	4	4	4	4	4
>ENSSSCP00000011838	2	0.864588	0.0396583	ITGB1	none	integrin, beta 1 (fibronectin receptor, beta polypeptide, antigen CD29 includes MDF2, MSK12) [Source:HGNC Symbol;Acc:6153]|10|ENSSSCG00000011101|ENSSSCT00000012148	321729	350424	304078	291646	340767	278163	283715	281606	290708	264483	286324	262141	18.4187	18.2141	18.1539	18.3784	18.1141	18.1033	18.1492	18.0128	18.1273	18	24	26	25	25	24	23	24	25	25	25	25	24	2	2	2	2	2	2	2	2	2
>ENSSSCP00000028146	23	1.30505	0.00255907	ITGB2	none	Sus scrofa integrin, beta 2 (complement component 3 receptor 3 and 4 subunit) (ITGB2), mRNA. [Source:RefSeq mRNA;Acc:NM_213908]|13|ENSSSCG00000025133|ENSSSCT00000029647	325906	341854	312688	318324	330757	425325	453306	329090	435487	445222	455403	433439	18.383	18.2544	18.2801	18.3354	18.7901	18.3281	18.7323	18.7642	18.7968	18.7255	15	16	15	17	10	12	23	19	20	22	23	22	23	23	23	23	23	23	23	23	23
>ENSSSCP00000007530	2	0.56794	0.000581922	JAG1	none	Delta-like protein [Source:UniProtKB/TrEMBL;Acc:F1SBK1]|17|ENSSSCG00000007067|ENSSSCT00000007738	17370.2	18835.5	14578.3	16500.1	19566.9	9865.24	8823.33	10181.4	8719.88	8294.58	9025.9	14146.3	14.2012	13.8315	14.0102	14.2561	13.1071	13.3136	13.0901	13.018	13.1399	13.7881	4	6	4	3	1	1	3	3	2	1	2	4	2	2	2	2	2	2	2	2	2
>ENSSSCP00000025443	3	0.836692	0.00591967	KALRN	none	Uncharacterized protein [Source:UniProtKB/TrEMBL;Acc:I3LMX1]|16|ENSSSCG00000028803|ENSSSCT00000031572	23430	23839.6	21756.5	22600.4	25523.5	19603.7	20232.1	20700.6	19120.2	17684.1	18798.1	21087.1	14.5411	14.4092	14.4641	14.6395	14.3044	14.3374	14.2228	14.1102	14.1983	14.3641	3	2	1	2	0	1	3	2	2	3	2	2	3	3	3	3	3	3	3	3	3
>ENSSSCP00000002919	21	0.943699	0.00112811	KARS	none	lysyl-tRNA synthetase [Source:HGNC Symbol;Acc:6215]|6|ENSSSCG00000002704|ENSSSCT00000002998	999750	1.00639e+06	1.00432e+06	998104	990189	943464	954676	946817	910473	925379	950388	973051	19.9408	19.9378	19.9288	19.9173	19.8647	19.8527	19.7963	19.8197	19.8582	19.8922	19	18	18	18	16	16	18	20	18	19	19	17	21	21	21	21	21	21	21	21	21
>ENSSSCP00000010111	11	1.22409	0.017551	KCTD12	none	potassium channel tetramerization domain containing 12 [Source:HGNC Symbol;Acc:14678]|11|ENSSSCG00000009468|ENSSSCT00000010381	465725	499793	442233	448424	472449	570091	667293	451426	590003	593838	605870	512113	18.931	18.7544	18.7745	18.8498	19.348	18.7841	19.1704	19.1797	19.2086	18.9661	10	10	10	10	10	10	13	11	11	12	12	11	11	11	11	11	11	11	11	11	11
>ENSSSCP00000015933	4	1.37067	0.00924821	KDELC2	none	KDEL (Lys-Asp-Glu-Leu) containing 2 [Source:HGNC Symbol;Acc:28496]|9|ENSSSCG00000015009|ENSSSCT00000016373	27447.4	23293.8	30220	26265	30010.7	37621.3	40719.5	34899.9	36316.2	37905.5	36534	39352.5	14.5077	14.8832	14.6809	14.8732	15.3134	15.0909	15.1483	15.2101	15.157	15.2642	0	0	0	0	0	0	5	1	0	2	3	3	4	4	4	4	4	4	4	4	4
>ENSSSCP00000019781	5	0.846668	0.0138239	KDSR	none	3-ketodihydrosphingosine reductase [Source:HGNC Symbol;Acc:4021]|1|ENSSSCG00000025744|ENSSSCT00000031522	113438	120437	103886	117489	111941	96044.5	93606.5	98021.3	114067	83525.2	89249.6	97796.9	16.8779	16.6646	16.8422	16.7724	16.5143	16.5808	16.7995	16.3499	16.4456	16.5775	3	4	3	3	2	3	3	4	4	4	5	3	5	5	5	5	5	5	5	5	5
>ENSSSCP00000023705	6	0.860371	0.0391206	KIF2A	none	kinesin heavy chain member 2A [Source:HGNC Symbol;Acc:6318]|GL896294.1|ENSSSCG00000030186|ENSSSCT00000032036	136360	154180	123231	134680	133348	117320	128160	113648	122029	107621	122467	109995	17.2343	16.911	17.0392	17.0248	16.9676	16.7942	16.8969	16.7156	16.902	16.7471	7	6	6	6	5	6	7	7	5	8	6	7	6	6	6	6	6	6	6	6	6
>ENSSSCP00000001803	11	0.923546	0.0485702	KLC4	none	kinesin light chain 4 [Source:HGNC Symbol;Acc:21624]|7|ENSSSCG00000001659|ENSSSCT00000001850	204071	196088	204963	204963	210269	188469	184564	196033	214327	183134	179176	173577	17.5811	17.645	17.645	17.6819	17.4938	17.5807	17.7095	17.4825	17.451	17.4052	14	17	18	16	9	14	17	17	17	17	16	15	11	11	11	11	11	11	11	11	11
>ENSSSCP00000020669	5	1.16159	0.00335551	KPNA1	none	Sus scrofa karyopherin alpha 1 (importin alpha 5) (KPNA1), mRNA. [Source:RefSeq mRNA;Acc:NM_001163405]|13|ENSSSCG00000028475|ENSSSCT00000024440	173750	171871	181931	179180	162017	201826	209553	196172	209163	209536	201093	185435	17.391	17.473	17.4511	17.3058	17.677	17.5818	17.6743	17.6768	17.6175	17.5006	6	5	5	6	3	5	6	6	5	5	6	5	5	5	5	5	5	5	5	5	5
>ENSSSCP00000006602	3	1.25333	0.028387	LACTB2	none	lactamase, beta 2 [Source:HGNC Symbol;Acc:18512]|4|ENSSSCG00000006192|ENSSSCT00000006786	14443.2	15615.9	14489.7	12008.3	15659.2	18102.2	22244.7	18309.4	15225.6	17748.7	16937.2	18147.4	13.9307	13.8227	13.5517	13.9347	14.4412	14.1603	13.8942	14.1154	14.0479	14.1475	0	0	0	0	0	1	3	0	1	0	0	1	3	3	3	3	3	3	3	3	3
>ENSSSCP00000021972	9	1.14735	0.0402087	LAP3	none	Uncharacterized protein [Source:UniProtKB/TrEMBL;Acc:I3LD43]|8|ENSSSCG00000023604|ENSSSCT00000027356	526655	588966	492532	496401	528721	604259	660454	522315	643669	599582	624156	575379	19.1678	18.9099	18.9211	19.0121	19.3331	18.9946	19.296	19.1936	19.2515	19.1342	6	9	7	8	8	7	9	9	9	9	9	9	9	9	9	9	9	9	9	9	9
>ENSSSCP00000018085	8	0.909403	0.0420035	LARP1	none	Uncharacterized protein [Source:UniProtKB/TrEMBL;Acc:F1RQC5]|16|ENSSSCG00000017069|ENSSSCT00000018585	120475	125652	124155	119209	112885	109561	122966	107016	115498	108596	105062	98225.5	16.9391	16.9218	16.8631	16.7845	16.9079	16.7075	16.8175	16.7286	16.6809	16.5838	5	7	6	7	1	1	8	8	6	9	6	6	8	8	8	8	8	8	8	8	8
>ENSSSCP00000008354	4	1.20741	0.0302029	LCMT1	none	Uncharacterized protein [Source:UniProtKB/TrEMBL;Acc:F1RFE3]|3|ENSSSCG00000007826|ENSSSCT00000008575	45627.6	47373.2	42959	46382.7	45795.6	55091.4	61177.7	51800.6	56011.9	67779.5	47583.9	46194.8	15.5318	15.3907	15.5013	15.4829	15.9007	15.6607	15.7734	16.0486	15.5382	15.4954	3	1	1	1	1	0	4	2	3	2	4	4	4	4	4	4	4	4	4	4	4
>ENSSSCP00000010045	26	1.14972	0.0231282	LCP1	none	lymphocyte cytosolic protein 1 (L-plastin) [Source:HGNC Symbol;Acc:6528]|11|ENSSSCG00000009412|ENSSSCT00000010313	1.75794e+06	1.65835e+06	1.72344e+06	1.82829e+06	1.82167e+06	2.02113e+06	2.21925e+06	1.71602e+06	2.06001e+06	2.25561e+06	1.96697e+06	1.90892e+06	20.6613	20.7169	20.8021	20.7968	21.0816	20.7106	20.9742	21.1051	20.9075	20.8643	20	24	20	22	17	18	26	22	23	25	25	21	26	26	26	26	26	26	26	26	26
>ENSSSCP00000014202	17	0.846951	0.00212811	LDHA	none	Sus scrofa lactate dehydrogenase A (LDHA), mRNA. [Source:RefSeq mRNA;Acc:NM_001172363]|2|ENSSSCG00000013366|ENSSSCT00000014597	7.18785e+06	7565272	6.90347e+06	6827348	7455315	6.08776e+06	6.43391e+06	5.96641e+06	6609281	5.8406e+06	6.01441e+06	5.66193e+06	22.851	22.7189	22.7029	22.8298	22.6173	22.5084	22.6561	22.4777	22.52	22.4329	16	17	17	17	14	14	16	16	17	17	16	16	17	17	17	17	17	17	17	17	17
>ENSSSCP00000018810	2	2.54154	0.000603577	LGALS9B	ECM-affiliated Proteins	Sus scrofa lectin, galactoside-binding, soluble, 9 (LGALS9), mRNA. [Source:RefSeq mRNA;Acc:NM_213932]|12|ENSSSCG00000017754|ENSSSCT00000019323	11689.2	12726.3	12545.6	9256.18	12228.7	29708.7	46644.5	22579	20073.7	23175	38817.5	26962.3	13.6355	13.6149	13.1762	13.578	15.5094	14.4627	14.293	14.5003	15.2444	14.7187	0	0	1	0	0	1	4	1	1	1	2	2	2	2	2	2	2	2	2	2	2
>ENSSSCP00000012061	5	0.880069	0.0314372	LIMD1	none	|13|ENSSSCG00000011313|ENSSSCT00000012385	63831.2	58844	61615.9	65686	69178.8	56175.8	53322.8	51779.1	53886	62481.6	54183.1	61402.2	15.8446	15.911	16.0033	16.078	15.7025	15.6601	15.7176	15.9311	15.7256	15.906	3	5	5	4	0	2	4	5	4	5	4	5	5	5	5	5	5	5	5	5	5
>ENSSSCP00000012297	16	0.738603	8.09601e-05	LMCD1	none	Sus scrofa LIM and cysteine-rich domains 1 (LMCD1), mRNA. [Source:RefSeq mRNA;Acc:NM_001008692]|13|ENSSSCG00000011538|ENSSSCT00000012628	1.45051e+06	1.48271e+06	1.34863e+06	1.51457e+06	1.45614e+06	1.07135e+06	999632	1.15986e+06	998003	1.0593e+06	1.01063e+06	1.20068e+06	20.4998	20.3631	20.5305	20.4737	19.931	20.1455	19.9287	20.0147	19.9468	20.1954	15	16	15	15	14	14	15	16	15	16	16	16	16	16	16	16	16	16	16	16	16
>ENSSSCP00000015075	7	1.20499	0.0211723	LNPEP	none	Sus scrofa leucyl/cystinyl aminopeptidase (LNPEP), mRNA. [Source:RefSeq mRNA;Acc:NM_001105291]|2|ENSSSCG00000014173|ENSSSCT00000015485	72542.6	80222.9	65192.2	73567.5	71187.9	87413.4	95363.4	72626.3	95910.7	88458.7	93758.6	78362.8	16.2917	15.9924	16.1668	16.1193	16.5411	16.1482	16.5494	16.4327	16.5167	16.2579	4	6	6	5	1	4	9	7	8	7	9	6	7	7	7	7	7	7	7	7	7
>ENSSSCP00000009075	2	0.622728	0.0008501	LTBP1	ECM Glycoproteins	latent transforming growth factor beta binding protein 1 [Source:HGNC Symbol;Acc:6714]|3|ENSSSCG00000008510|ENSSSCT00000009313	11423.4	11798.4	10038.5	11358.9	12497.9	7113.69	8215.04	7130.84	5098.49	7519.83	6201.91	8516.04	13.5263	13.2933	13.4715	13.6094	13.0041	12.7999	12.3159	12.8765	12.5985	13.056	1	3	3	2	5	1	2	0	0	0	0	2	2	2	2	2	2	2	2	2	2
>ENSSSCP00000025632	12	0.893175	0.031096	LUZP1	none	leucine zipper protein 1 [Source:HGNC Symbol;Acc:14985]|6|ENSSSCG00000003532|ENSSSCT00000003924	228669	223456	226647	235192	229382	204242	183286	199931	226022	232474	189899	193837	17.7696	17.7901	17.8435	17.8074	17.4837	17.6091	17.7861	17.8267	17.5349	17.5645	7	11	12	10	3	5	9	10	8	10	9	11	12	12	12	12	12	12	12	12	12
>ENSSSCP00000025556	6	0.840245	0.00478538	LXN	none	latexin [Source:HGNC Symbol;Acc:13347]|13|ENSSSCG00000020984|ENSSSCT00000025922	1.0481e+06	991024	1055645	1.11919e+06	1.02652e+06	880657	863672	889142	897831	894336	866604	872356	19.9186	20.0097	20.094	19.9693	19.7201	19.7621	19.7761	19.7705	19.725	19.7346	6	6	6	6	6	6	6	6	6	6	6	6	6	6	6	6	6	6	6	6	6
>ENSSSCP00000023589	4	1.28561	0.00116478	LYPLA2	none	lysophospholipase II [Source:HGNC Symbol;Acc:6738]|6|ENSSSCG00000023191|ENSSSCT00000024963	60210.3	59949.9	60834.9	56423.7	63632.7	77406.7	90194.4	68095.7	74206	73048.6	74621.6	84274.1	15.8715	15.8926	15.784	15.9575	16.4607	16.0553	16.1792	16.1566	16.1873	16.3628	1	3	4	2	1	1	3	3	4	4	4	3	4	4	4	4	4	4	4	4	4
>ENSSSCP00000012062	9	0.86485	0.0308374	LZTFL1	none	leucine zipper transcription factor-like 1 [Source:HGNC Symbol;Acc:6741]|13|ENSSSCG00000011314|ENSSSCT00000012386	302006	326053	282202	278210	321559	261190	250802	258387	281210	280705	259794	236242	18.3147	18.1064	18.0858	18.2947	17.9362	17.9792	18.1013	18.0987	17.987	17.8499	8	8	10	6	4	6	8	10	7	9	9	9	9	9	9	9	9	9	9	9	9
>ENSSSCP00000000703	3	0.856556	0.0467861	M6PR	none	mannose-6-phosphate receptor (cation dependent) [Source:HGNC Symbol;Acc:6752]|5|ENSSSCG00000000662|ENSSSCT00000000718	79647.9	71521.3	89644.2	81546.7	75879.5	68222.9	78643.1	71302.6	58558.4	71206.1	65967.4	63659.6	16.1261	16.4519	16.3153	16.2114	16.263	16.1217	15.8376	16.1197	16.0095	15.9581	2	2	2	3	2	2	3	3	2	4	4	3	3	3	3	3	3	3	3	3	3
>ENSSSCP00000003959	157	0.851611	0.000100673	MACF1	none	microtubule-actin crosslinking factor 1 [Source:HGNC Symbol;Acc:13664]|6|ENSSSCG00000003654|ENSSSCT00000004050	3362959	3.35261e+06	3.44332e+06	3.22351e+06	3.4324e+06	2.86393e+06	2.69488e+06	2.99413e+06	2.94459e+06	2875036	2.78912e+06	2.88585e+06	21.6769	21.7154	21.6202	21.7108	21.3618	21.5137	21.4896	21.4551	21.4114	21.4606	121	145	127	136	56	75	135	139	126	129	133	127	157	157	157	157	157	157	157	157	157
>ENSSSCP00000013044	6	1.07798	0.00860812	MAOA	none	monoamine oxidase A [Source:HGNC Symbol;Acc:6833]|X|ENSSSCG00000012257|ENSSSCT00000013404	355993	352596	359385	349038	362951	383752	380706	358619	407951	373328	396875	385033	18.4277	18.4552	18.413	18.4694	18.5383	18.4521	18.638	18.5101	18.5983	18.5546	11	13	12	11	8	9	12	14	12	13	14	10	6	6	6	6	6	6	6	6	6
>ENSSSCP00000017984	100	0.914123	0.00213326	MAP1B	none	microtubule-associated protein 1B [Source:HGNC Symbol;Acc:6836]|16|ENSSSCG00000016974|ENSSSCT00000018484	34757780	33710428	35452060	34571296	35297336	3.17729e+07	30081122	31951004	33007900	31863280	30487450	33246528	25.0067	25.0794	25.0431	25.0731	24.8424	24.9294	24.9763	24.9254	24.8617	24.9867	93	98	95	95	89	90	99	98	96	98	98	97	100	100	100	100	100	100	100	100	100
>ENSSSCP00000026457	2	0.770677	0.00513927	MAP2K1	none	mitogen-activated protein kinase kinase 1 [Source:HGNC Symbol;Acc:6840]|1|ENSSSCG00000029873|ENSSSCT00000023493	137093	150888	126021	126018	145446	105655	120114	110274	92194.7	95824.8	96052.3	119469	17.2031	16.9433	16.9433	17.1501	16.874	16.7507	16.4924	16.5481	16.5515	16.8663	2	2	2	2	1	2	2	2	2	2	2	2	2	2	2	2	2	2	2	2	2
>ENSSSCP00000012096	38	1.08233	0.00533836	MAP4	none	|13|ENSSSCG00000011343|ENSSSCT00000012420	5.45474e+06	5584008	5331373	5394351	5509230	5.90386e+06	5843065	5675232	6.3452e+06	6.04852e+06	5839519	5.67159e+06	22.4129	22.3461	22.363	22.3934	22.4783	22.4362	22.5972	22.5282	22.4774	22.4353	36	36	36	37	25	30	38	38	37	38	38	37	38	38	38	38	38	38	38	38	38
>ENSSSCP00000003942	6	0.856449	0.0249538	MAP7D1	none	Uncharacterized protein [Source:UniProtKB/TrEMBL;Acc:F1SV46]|6|ENSSSCG00000003637|ENSSSCT00000004033	162258	150287	173909	151134	173703	138966	130458	149290	140404	140403	134109	139132	17.1974	17.408	17.2055	17.4063	16.9932	17.1878	17.0992	17.0992	17.033	17.0861	11	12	14	14	6	10	12	13	12	12	13	10	6	6	6	6	6	6	6	6	6
>ENSSSCP00000004046	7	1.32019	0.00137689	MAPRE2	none	microtubule-associated protein, RP/EB family, member 2 [Source:HGNC Symbol;Acc:6891]|6|ENSSSCG00000003738|ENSSSCT00000004139	74996.6	74118.7	77856.3	75524.5	72486.7	99009.9	95879.1	104839	80602.1	110127	95884	106728	16.1776	16.2485	16.2047	16.1454	16.5489	16.6778	16.2985	16.7488	16.549	16.7036	7	7	6	7	4	6	9	10	7	8	8	9	7	7	7	7	7	7	7	7	7
>ENSSSCP00000026286	5	1.10143	0.00572116	MAPRE3	none	microtubule-associated protein, RP/EB family, member 3 [Source:HGNC Symbol;Acc:6892]|3|ENSSSCG00000029185|ENSSSCT00000027657	161346	166662	156165	160338	162219	177710	172523	178776	171899	183088	193099	166877	17.3466	17.2527	17.2908	17.3076	17.3964	17.4478	17.3912	17.4822	17.559	17.3484	4	5	5	4	3	2	4	5	6	5	5	4	5	5	5	5	5	5	5	5	5
>ENSSSCP00000003918	7	0.639789	0.0135783	MARCKSL1	none	Uncharacterized protein [Source:UniProtKB/TrEMBL;Acc:F1SV88]|6|ENSSSCG00000003614|ENSSSCT00000004009	8.24937e+06	6204541	10168893	8349981	8.27408e+06	5.27786e+06	5349814	5027559	4526497	5036727	4.93582e+06	6790745	22.5649	23.2777	22.9933	22.9802	22.3511	22.2614	22.11	22.2641	22.2349	22.6951	7	7	8	7	7	6	8	7	7	7	7	7	7	7	7	7	7	7	7	7	7
>ENSSSCP00000027603	10	1.13534	0.0321929	MAT2B	none	methionine adenosyltransferase II, beta [Source:HGNC Symbol;Acc:6905]|16|ENSSSCG00000021229|ENSSSCT00000025011	410829	443582	387021	427065	385647	466431	472400	476151	456145	474070	465248	454573	18.7588	18.5621	18.7041	18.5569	18.8496	18.8611	18.7991	18.8547	18.8276	18.7942	6	7	8	7	4	5	10	9	9	10	11	9	10	10	10	10	10	10	10	10	10
>ENSSSCP00000025866	4	0.921339	0.04008	MDH2	none	Sus scrofa malate dehydrogenase 2, NAD (mitochondrial) (MDH2), nuclear gene encoding mitochondrial protein, mRNA. [Source:RefSeq mRNA;Acc:NM_001244153]|3|ENSSSCG00000025486|ENSSSCT00000028089	1.89113e+06	1860323	1.83626e+06	1.9884e+06	1.87954e+06	1.74237e+06	1.54445e+06	1.81997e+06	1.71629e+06	1.81076e+06	1879692	1.68306e+06	20.8271	20.8083	20.9232	20.8419	20.5587	20.7955	20.7109	20.7882	20.8421	20.6827	21	21	20	20	19	19	20	21	21	20	21	21	4	4	4	4	4	4	4	4	4
>ENSSSCP00000023931	8	0.897424	0.0263739	MESDC2	none	mesoderm development candidate 2 [Source:HGNC Symbol;Acc:13520]|7|ENSSSCG00000021587|ENSSSCT00000026921	1.15534e+06	1.09175e+06	1180795	1207190	1.14162e+06	1.03683e+06	903246	1.01983e+06	1.08333e+06	1.16125e+06	1.03953e+06	1013780	20.0582	20.1713	20.2032	20.1226	19.7848	19.9599	20.047	20.1472	19.9875	19.9513	8	9	8	10	7	8	8	8	8	8	8	8	8	8	8	8	8	8	8	8	8
>ENSSSCP00000011466	4	1.34134	0.000984043	MGMT	none	O-6-methylguanine-DNA methyltransferase [Source:HGNC Symbol;Acc:7059]|14|ENSSSCG00000010756|ENSSSCT00000011768	66759.1	63601.3	66210.2	68475.2	68749.8	89546.6	99312.2	89120.4	90984	81601.5	75007.8	101254	15.9568	16.0148	16.0633	16.0691	16.5997	16.4435	16.4733	16.3163	16.1948	16.6276	3	2	2	2	2	2	6	4	3	3	4	4	4	4	4	4	4	4	4	4	4
>ENSSSCP00000011549	13	0.81219	0.00220236	MIA3	none	melanoma inhibitory activity family, member 3 [Source:HGNC Symbol;Acc:24008]|10|ENSSSCG00000010834|ENSSSCT00000011852	206717	186847	214131	211859	214032	167894	149721	165925	175385	183140	164304	168887	17.5115	17.7081	17.6927	17.7075	17.1919	17.3402	17.4202	17.4826	17.326	17.3657	8	12	9	11	1	7	12	10	9	12	13	9	13	13	13	13	13	13	13	13	13
>ENSSSCP00000006721	5	1.17081	0.0354303	MPC2	none	mitochondrial pyruvate carrier 2 [Source:HGNC Symbol;Acc:24515]|4|ENSSSCG00000006304|ENSSSCT00000006909	95525.2	94010	96153	89365.2	102573	111842	107221	98629.9	138044	99311.9	119095	108752	16.5205	16.553	16.4474	16.6463	16.7102	16.5897	17.0748	16.5997	16.8618	16.7307	1	2	2	2	2	2	4	2	3	3	4	2	5	5	5	5	5	5	5	5	5
>ENSSSCP00000017001	2	0.920873	0.0391875	MSTN	Secreted Factors	Sus scrofa myostatin (MSTN), mRNA. [Source:RefSeq mRNA;Acc:NM_214435]|15|ENSSSCG00000016047|ENSSSCT00000017472	42468.9	44771.1	41334.9	41161.9	42607.8	39108.5	36932.3	38807.6	42200.6	35491.9	41916.4	39302.1	15.4503	15.3351	15.329	15.3788	15.1726	15.2441	15.365	15.1152	15.3552	15.2623	1	3	1	1	1	1	2	3	1	2	2	2	2	2	2	2	2	2	2	2	2
>ENSSSCP00000019144	2	1.60849	0.00450018	MT-ND4	none	NADH-ubiquinone oxidoreductase chain 4 [Source:UniProtKB/Swiss-Prot;Acc:O79881]|MT|ENSSSCG00000018087|ENSSSCT00000019682	3737.22	3685.25	4104.74	4171.29	2987.59	6011.26	5977.28	6591.04	5181.88	4055.9	7423.84	6837.63	11.8475	12.0031	12.0263	11.5448	12.5453	12.6863	12.3393	11.9858	12.858	12.7393	1	1	1	1	0	0	2	2	1	1	2	2	2	2	2	2	2	2	2	2	2
>ENSSSCP00000029166	23	1.73688	0.0125973	MX1	none	Sus scrofa myxovirus (influenza virus) resistance 1, interferon-inducible protein p78 (mouse) (MX1), mRNA. [Source:RefSeq mRNA;Acc:NM_214061]|13|ENSSSCG00000012077|ENSSSCT00000034038	751506	696159	753460	720471	835934	1.30528e+06	1.97061e+06	1.34215e+06	827441	876461	1.58026e+06	1.23473e+06	19.4091	19.5232	19.4586	19.673	20.9102	20.3561	19.6583	19.7413	20.5917	20.2358	19	22	15	22	14	18	28	27	22	22	29	27	23	23	23	23	23	23	23	23	23
>ENSSSCP00000012857	8	1.76947	0.0493522	MX2	none	interferon-induced GTP-binding protein Mx2 [Source:RefSeq peptide;Acc:NP_001090885]|13|ENSSSCG00000012076|ENSSSCT00000013209	42992.7	33413.9	32747.7	40451	65358.1	76074.4	134900	67321.6	42130.9	50665	78254.2	83174.8	15.0282	14.9991	15.3039	15.9961	17.0415	16.0388	15.3626	15.6287	16.2559	16.3439	1	2	2	0	0	1	14	9	1	3	9	9	8	8	8	8	8	8	8	8	8
>ENSSSCP00000026757	3	0.912331	0.0219976	MYL9	none	Sus scrofa myosin, light chain 9, regulatory (MYL9), mRNA. [Source:RefSeq mRNA;Acc:NM_001244472]|17|ENSSSCG00000024230|ENSSSCT00000023008	598290	582499	597625	614696	598340	545839	497710	613436	518719	556054	538951	550161	19.1519	19.1889	19.2295	19.1906	18.9249	19.2266	18.9846	19.0849	19.0398	19.0695	3	3	3	3	3	3	3	3	3	3	3	3	3	3	3	3	3	3	3	3	3
>ENSSSCP00000014458	3	1.21265	0.00176702	MYO1F	none	myosin IF [Source:HGNC Symbol;Acc:7600]|2|ENSSSCG00000013604|ENSSSCT00000014859	40911.5	41997.9	43481.1	38207.8	39959.3	49611.5	51518.3	49772.2	46242.4	45323.3	49547.1	55265.7	15.358	15.4081	15.2216	15.2862	15.6528	15.6031	15.4969	15.468	15.5965	15.7541	0	1	0	1	0	0	2	2	2	1	2	3	3	3	3	3	3	3	3	3	3
>ENSSSCP00000011165	27	0.707741	0.00262692	MYOF	none	Uncharacterized protein [Source:UniProtKB/TrEMBL;Acc:F1SC82]|14|ENSSSCG00000010476|ENSSSCT00000011464	498568	499592	472583	458197	563900	352857	442626	383431	276904	363982	306037	344162	18.9304	18.8502	18.8056	19.1051	18.7557	18.5486	18.079	18.4735	18.2233	18.3927	28	37	29	36	16	15	24	27	21	12	21	23	27	27	27	27	27	27	27	27	27
>ENSSSCP00000012526	9	1.2903	0.0115087	NCEH1	none	neutral cholesterol ester hydrolase 1 [Source:HGNC Symbol;Acc:29260]|13|ENSSSCG00000011755|ENSSSCT00000012866	125713	121717	109497	144592	127045	162208	172397	170514	172819	150721	172500	134293	16.8932	16.7405	17.1416	16.955	17.3954	17.3795	17.3989	17.2015	17.3962	17.035	4	4	5	5	2	4	5	7	6	7	5	3	9	9	9	9	9	9	9	9	9
>ENSSSCP00000016495	2	1.31129	0.0243113	NCF2	none	neutrophil cytosolic factor 2 [Source:HGNC Symbol;Acc:7661]|9|ENSSSCG00000015559|ENSSSCT00000016949	22434.8	20076.7	19473.7	25906.8	24282	29418.4	32680.5	26218	30213.5	31442.1	33467.6	22488.7	14.2932	14.2492	14.661	14.5676	14.9961	14.6783	14.8829	14.9404	15.0305	14.4569	1	1	0	1	1	1	2	1	1	3	3	1	2	2	2	2	2	2	2	2	2
>ENSSSCP00000008695	2	0.78966	0.0103883	NCK2	none	Sus scrofa NCK adaptor protein 2 (NCK2), mRNA. [Source:RefSeq mRNA;Acc:NM_001137631]|3|ENSSSCG00000008144|ENSSSCT00000008921	39607.6	35879.4	42224.2	43702.6	36624.1	31276.5	28382	31233.3	29775.4	32500.8	32333.4	33434.3	15.1309	15.3658	15.4154	15.1605	14.7927	14.9308	14.8618	14.9882	14.9807	15.029	2	2	2	2	1	2	2	2	2	2	2	2	2	2	2	2	2	2	2	2	2
>ENSSSCP00000026706	5	0.810296	1.49478e-05	NCL	none	Uncharacterized protein [Source:UniProtKB/TrEMBL;Acc:I3LRH2]|GL895502.2|ENSSSCG00000029732|ENSSSCT00000032422	2.32034e+06	2.31172e+06	2.25795e+06	2292854	2.41883e+06	1.88016e+06	1.83483e+06	1.92263e+06	1.93358e+06	1.81895e+06	1.94507e+06	1.82589e+06	21.1405	21.1066	21.1287	21.2059	20.8072	20.8746	20.8828	20.7947	20.8914	20.8002	21	21	21	21	21	21	21	21	21	21	21	21	5	5	5	5	5	5	5	5	5
>ENSSSCP00000006450	2	1.17493	0.0352938	NCOA7	none	Uncharacterized protein [Source:UniProtKB/TrEMBL;Acc:F1S1E9]|4|ENSSSCG00000006037|ENSSSCT00000006626	34846.7	31221.3	35123.5	38787	34255.1	40942.3	42771.1	39611.2	43853.5	41828.4	44231.8	33358	14.9302	15.1001	15.2433	15.064	15.3844	15.2736	15.4204	15.3522	15.4328	15.0257	5	15	9	9	0	2	17	15	14	13	15	11	2	2	2	2	2	2	2	2	2
>ENSSSCP00000006355	7	1.1071	0.00685324	NDRG1	none	N-myc downstream regulated 1 [Source:HGNC Symbol;Acc:7679]|4|ENSSSCG00000005944|ENSSSCT00000006527	462778	443697	457320	476512	473584	512343	499166	504767	469888	550562	532414	517259	18.7592	18.8028	18.8622	18.8533	18.9292	18.9453	18.842	19.0705	19.0222	18.9805	5	6	5	4	2	3	9	6	6	7	7	7	7	7	7	7	7	7	7	7	7
>ENSSSCP00000007798	2	1.3257	0.0299121	NDRG3	none	NDRG family member 3 [Source:HGNC Symbol;Acc:14462]|17|ENSSSCG00000007322|ENSSSCT00000008012	27857.3	23733.1	33339.1	29878.1	24478.8	36930.5	45278.7	35515.7	36329.7	29152.6	37050.6	38255.5	14.5346	15.0249	14.8668	14.5792	15.4665	15.1162	15.1489	14.8313	15.1772	15.2234	0	2	1	1	0	0	2	2	2	2	2	2	2	2	2	2	2	2	2	2	2
>ENSSSCP00000017323	10	1.04818	0.0447326	NDUFA10	none	NADH dehydrogenase (ubiquinone) 1 alpha subcomplex, 10, 42kDa [Source:HGNC Symbol;Acc:7684]|15|ENSSSCG00000016349|ENSSSCT00000017804	278863	269332	275238	288941	281941	292298	287079	297025	288235	296053	295076	290321	18.039	18.0703	18.1404	18.105	18.1311	18.1802	18.1369	18.1755	18.1707	18.1473	6	8	8	8	6	5	11	9	10	8	9	9	10	10	10	10	10	10	10	10	10
>ENSSSCP00000000968	2	1.64284	0.00574779	NDUFA12	none	NADH dehydrogenase (ubiquinone) 1 alpha subcomplex, 12 [Source:HGNC Symbol;Acc:23987]|5|ENSSSCG00000000905|ENSSSCT00000000989	22236.5	17067.3	25174.3	24510.1	22194.5	36531.2	42334.4	37648.8	34297	34932.8	37823.3	32150.7	14.0589	14.6197	14.5811	14.4379	15.3695	15.2003	15.0658	15.0923	15.207	14.9726	0	1	1	1	0	0	2	2	1	2	3	2	2	2	2	2	2	2	2	2	2
>ENSSSCP00000027283	2	0.834296	0.0415574	NECAP1	none	NECAP endocytosis associated 1 [Source:HGNC Symbol;Acc:24539]|GL896388.1|ENSSSCG00000025179|ENSSSCT00000029153	97937.9	85518.7	96908.9	112614	96710.1	81709.2	75196.6	79784.4	89988.7	85687.4	81469.8	78128.5	16.384	16.5643	16.781	16.5614	16.1984	16.2838	16.4575	16.3868	16.314	16.2536	2	1	1	1	0	2	2	2	1	2	1	2	2	2	2	2	2	2	2	2	2
>ENSSSCP00000024750	2	1.37288	0.0380969	NMI	none	N-myc (and STAT) interactor [Source:HGNC Symbol;Acc:7854]|15|ENSSSCG00000022011|ENSSSCT00000022256	10460.2	13279.3	10416.3	8136.55	10008.6	14360.6	16622.7	12503.6	13713	13184.4	13428.7	16711.2	13.6969	13.3466	12.9902	13.289	14.0209	13.6101	13.7433	13.6865	13.713	14.0285	1	1	2	1	0	1	2	2	1	1	2	3	2	2	2	2	2	2	2	2	2
>ENSSSCP00000011267	8	0.841804	0.00646344	NOLC1	none	nucleolar and coiled-body phosphoprotein 1 [Source:HGNC Symbol;Acc:15608]|14|ENSSSCG00000010576|ENSSSCT00000011569	221847	220520	203204	224639	239024	186752	172460	197395	205949	194283	175938	174485	17.7506	17.6326	17.7773	17.8668	17.3959	17.5907	17.6519	17.5678	17.4247	17.4127	5	7	4	8	2	4	6	5	6	8	8	4	8	8	8	8	8	8	8	8	8
>ENSSSCP00000025087	8	0.928984	0.0369285	NOMO1	none	Uncharacterized protein [Source:UniProtKB/TrEMBL;Acc:I3LLW7]|JH118682.1|ENSSSCG00000025565|ENSSSCT00000030288	173295	168427	165383	176984	182385	160988	161968	167733	166847	157743	158993	152644	17.3618	17.3355	17.4333	17.4766	17.3053	17.3558	17.3482	17.2672	17.2786	17.2198	4	6	5	5	4	4	7	6	8	7	7	6	8	8	8	8	8	8	8	8	8
>ENSSSCP00000027184	20	0.897256	0.0119864	NONO	none	Uncharacterized protein [Source:UniProtKB/TrEMBL;Acc:I3LSU1]|GL895834.1|ENSSSCG00000023245|ENSSSCT00000031783	4.0241e+06	3745943	4193779	4.1062e+06	4050484	3.61065e+06	3.66345e+06	3.62907e+06	3.79473e+06	3.38441e+06	3489375	3702873	21.8369	21.9998	21.9694	21.9497	21.8048	21.7912	21.8556	21.6905	21.7345	21.8202	17	19	18	19	14	15	19	20	20	19	21	21	20	20	20	20	20	20	20	20	20
>ENSSSCP00000004014	10	1.14209	0.00804892	NPC1	none	Niemann-Pick disease, type C1 [Source:HGNC Symbol;Acc:7897]|6|ENSSSCG00000003707|ENSSSCT00000004106	187928	180877	178360	193995	198478	214630	213318	214352	238802	202107	219315	199885	17.4646	17.4444	17.5657	17.5986	17.7026	17.7096	17.8655	17.6248	17.7426	17.6088	3	6	4	7	1	3	9	9	7	8	9	8	10	10	10	10	10	10	10	10	10
>ENSSSCP00000008018	9	1.38078	0.000535892	NPEPL1	none	Sus scrofa aminopeptidase-like 1 (NPEPL1), mRNA. [Source:RefSeq mRNA;Acc:NM_001123148]|17|ENSSSCG00000007517|ENSSSCT00000008237	70696.1	70296.3	72107.2	75180.1	65200.6	97616	112741	104534	85846.3	86194.9	105312	91067.4	16.1012	16.1379	16.1981	15.9926	16.7827	16.6736	16.3895	16.3953	16.6843	16.4746	4	5	5	5	3	3	11	8	7	9	8	10	9	9	9	9	9	9	9	9	9
>ENSSSCP00000027926	5	1.22154	0.046259	NPL	none	Sus scrofa N-acetylneuraminate pyruvate lyase (dihydrodipicolinate synthase) (NPL), mRNA. [Source:RefSeq mRNA;Acc:NM_214071]|GL892421.2|ENSSSCG00000022292|ENSSSCT00000028771	49184.7	47730.6	47431.1	51690.5	49886.5	60081.2	70514	46285.9	65191.4	57892.3	70016.4	50587.3	15.5426	15.5335	15.6576	15.6064	16.1056	15.4983	15.9924	15.8211	16.0954	15.6265	2	4	4	4	0	2	5	5	5	5	5	4	5	5	5	5	5	5	5	5	5
>ENSSSCP00000011258	3	0.805211	0.0138954	NPM3	none	nucleophosmin/nucleoplasmin 3 [Source:HGNC Symbol;Acc:7931]|14|ENSSSCG00000010568|ENSSSCT00000011560	69512.8	66072.5	64105.2	79438.5	68435.3	55972.5	49243	55842.3	47317.7	63886.9	56540.3	63004.7	16.0118	15.9682	16.2776	16.0625	15.5876	15.7691	15.5301	15.9632	15.787	15.9432	2	2	2	2	2	2	2	3	2	3	3	3	3	3	3	3	3	3	3	3	3
>ENSSSCP00000007652	15	0.918818	0.0230047	NSFL1C	none	NSFL1 (p97) cofactor (p47) [Source:HGNC Symbol;Acc:15912]|17|ENSSSCG00000007187|ENSSSCT00000007863	1.4778e+06	1.45427e+06	1.50474e+06	1.52361e+06	1.42859e+06	1.35783e+06	1.22389e+06	1.34845e+06	1.34707e+06	1.44836e+06	1.3229e+06	1.45634e+06	20.4719	20.5211	20.5391	20.4462	20.223	20.3629	20.3614	20.466	20.3353	20.4739	13	15	15	14	13	13	15	15	15	16	15	15	15	15	15	15	15	15	15	15	15
>ENSSSCP00000003413	19	0.854171	0.0119612	NUCB1	none	nucleobindin 1 [Source:HGNC Symbol;Acc:8043]|6|ENSSSCG00000003150|ENSSSCT00000003496	989264	899397	1.06108e+06	982094	1.01449e+06	845001	774794	845815	843922	891871	858589	855014	19.7786	20.0171	19.9055	19.9523	19.5635	19.69	19.6868	19.7665	19.7116	19.7056	14	18	17	18	8	12	18	19	18	18	19	17	19	19	19	19	19	19	19	19	19
>ENSSSCP00000003869	16	0.810006	0.00499781	NUDC	none	nudC nuclear distribution protein [Source:HGNC Symbol;Acc:8045]|6|ENSSSCG00000003566|ENSSSCT00000003960	1.27685e+06	1.38184e+06	1.2148e+06	1.22419e+06	1.28659e+06	1.03426e+06	1.02195e+06	1.04008e+06	1.04729e+06	1.04236e+06	1.03986e+06	1.01402e+06	20.3982	20.2123	20.2234	20.2951	19.9629	19.9883	19.9982	19.9914	19.988	19.9517	16	16	16	16	15	14	14	17	15	16	15	16	16	16	16	16	16	16	16	16	16
>ENSSSCP00000018843	6	0.822585	0.00482143	NUFIP2	none	nuclear fragile X mental retardation protein interacting protein 2 [Source:HGNC Symbol;Acc:17634]|12|ENSSSCG00000017785|ENSSSCT00000019357	56335.4	52468.9	58407.7	53368.2	61096.8	46340.7	45032.5	46648.2	42506.5	45913.1	45824.4	52119.2	15.6792	15.8339	15.7037	15.8988	15.4587	15.5095	15.3754	15.4866	15.4838	15.6695	5	6	5	4	2	2	4	4	2	5	2	3	6	6	6	6	6	6	6	6	6
>ENSSSCP00000014051	2	0.820148	0.0471003	NUP160	none	Uncharacterized protein [Source:UniProtKB/TrEMBL;Acc:F1SIF8]|2|ENSSSCG00000013223|ENSSSCT00000014443	236841	236754	255845	259028	195738	194245	184531	173742	221218	219261	185444	181273	17.853	17.9649	17.9827	17.5786	17.4935	17.4066	17.7551	17.7423	17.5006	17.4678	1	2	2	1	0	0	4	3	1	2	3	2	2	2	2	2	2	2	2	2	2
>ENSSSCP00000015713	11	0.686662	0.00224939	NUP98	none	nucleoporin 98kDa [Source:HGNC Symbol;Acc:8068]|9|ENSSSCG00000014794|ENSSSCT00000016145	210218	203456	178591	228483	230343	144349	129920	130581	152859	175620	155462	121651	17.6344	17.4463	17.8017	17.8134	16.9873	16.9946	17.2218	17.4221	17.2462	16.8924	5	7	5	8	0	0	8	10	3	10	6	9	11	11	11	11	11	11	11	11	11
>ENSSSCP00000010548	11	1.4944	0.0305565	OAS2	none	2'-5'-oligoadenylate synthetase 2, 69/71kDa [Source:HGNC Symbol;Acc:8087]|14|ENSSSCG00000009881|ENSSSCT00000010831	317857	326363	301169	274320	369577	475006	634661	463173	349254	310841	647361	444744	18.3161	18.2002	18.0655	18.4955	19.2756	18.8212	18.4139	18.2458	19.3042	18.7626	7	8	6	9	5	6	11	10	11	10	13	8	11	11	11	11	11	11	11	11	11
>ENSSSCP00000005664	3	0.875632	0.0166629	OSTF1	none	Sus scrofa osteoclast stimulating factor 1 (OSTF1), mRNA. [Source:RefSeq mRNA;Acc:NM_214005]|1|ENSSSCG00000005273|ENSSSCT00000005808	99743.6	96749.1	92122.5	104191	105912	87338.7	85590	84415.5	82723.5	95836.1	83403.7	92063.5	16.562	16.4913	16.6689	16.6925	16.3852	16.3652	16.336	16.5483	16.3478	16.4903	3	2	3	3	3	3	3	3	3	4	3	3	3	3	3	3	3	3	3	3	3
>ENSSSCP00000011997	4	1.27486	0.0383029	OXSR1	none	oxidative stress responsive 1 [Source:HGNC Symbol;Acc:8508]|13|ENSSSCG00000011252|ENSSSCT00000012319	126334	105645	147428	136872	115392	161058	191674	148248	139311	164489	159301	163327	16.6889	17.1697	17.0625	16.8162	17.5483	17.1777	17.0879	17.3276	17.2814	17.3174	1	3	0	2	0	0	3	3	3	2	3	2	4	4	4	4	4	4	4	4	4
>ENSSSCP00000010972	18	0.825599	0.000381276	P4HA1	ECM Regulators	Sus scrofa prolyl 4-hydroxylase, alpha polypeptide I (P4HA1), mRNA. [Source:RefSeq mRNA;Acc:NM_001097435]|14|ENSSSCG00000010292|ENSSSCT00000011264	3.08001e+06	3186952	3.12417e+06	2.88336e+06	3125559	2.54285e+06	2.44261e+06	2776726	2.45839e+06	2.63883e+06	2.3935e+06	2.54707e+06	21.6037	21.575	21.4593	21.5757	21.22	21.405	21.2293	21.3315	21.1907	21.2804	17	17	17	18	18	18	18	18	18	18	17	17	18	18	18	18	18	18	18	18	18
>ENSSSCP00000003965	10	0.822967	0.00730382	PABPC4	none	poly(A) binding protein, cytoplasmic 4 (inducible form) [Source:HGNC Symbol;Acc:8557]|6|ENSSSCG00000003660|ENSSSCT00000004056	558705	573027	514467	608155	539171	459796	439038	478745	481402	460337	459360	439893	19.1282	18.9727	19.2141	19.0404	18.744	18.8689	18.8769	18.8123	18.8093	18.7468	8	9	9	8	8	8	9	10	9	10	9	10	10	10	10	10	10	10	10	10	10
>ENSSSCP00000025618	14	1.18554	0.0168257	PADI2	none	Uncharacterized protein [Source:UniProtKB/TrEMBL;Acc:I3LNE4]|6|ENSSSCG00000026478|ENSSSCT00000027772	567476	578164	548639	583120	559983	672764	713124	545751	713973	719219	727267	617254	19.1411	19.0655	19.1534	19.095	19.4438	19.0579	19.4455	19.4561	19.4721	19.2355	12	13	13	12	12	12	15	12	16	14	14	13	14	14	14	14	14	14	14	14	14
>ENSSSCP00000003276	5	1.26176	0.00782347	PAFAH1B3	none	Uncharacterized protein; Uncharacterized protein [Source:UniProtKB/TrEMBL;Acc:F1RGI2]|6|ENSSSCG00000029070|ENSSSCT00000003359	206603	218956	183014	220156	204284	260683	275812	225191	299694	279542	258769	225092	17.7403	17.4816	17.7482	17.6402	18.0733	17.7808	18.1931	18.0927	17.9813	17.7802	3	5	4	2	3	1	5	4	4	5	5	4	5	5	5	5	5	5	5	5	5
>ENSSSCP00000012614	14	0.901695	0.0274288	PAK2	none	|13|ENSSSCG00000011843|ENSSSCT00000012955	657521	614746	694390	676291	644659	592884	593056	598237	601219	572955	591324	600511	19.2296	19.4054	19.3673	19.2982	19.1778	19.1904	19.1975	19.1281	19.1736	19.1958	14	15	14	15	11	11	15	15	15	15	15	15	14	14	14	14	14	14	14	14	14
>ENSSSCP00000007329	16	0.871729	0.0392673	PALMD	none	palmdelphin [Source:HGNC Symbol;Acc:15846]|4|ENSSSCG00000006874|ENSSSCT00000007528	1.46592e+06	1.3727e+06	1.44644e+06	1.5493e+06	1.49525e+06	1.27789e+06	1.12596e+06	1.20313e+06	1.36821e+06	1.51205e+06	1.3519e+06	1.10607e+06	20.3886	20.4641	20.5632	20.512	20.1027	20.1984	20.3839	20.5281	20.3666	20.077	13	18	15	15	10	14	13	16	16	16	17	15	16	16	16	16	16	16	16	16	16
>ENSSSCP00000013742	15	1.15244	0.0424353	PC	none	Uncharacterized protein [Source:UniProtKB/TrEMBL;Acc:F1RUV6]|2|ENSSSCG00000012925|ENSSSCT00000014128	773667	847059	706835	720698	820078	891602	898806	934801	912066	831020	914900	858016	19.6921	19.431	19.459	19.6454	19.7777	19.8343	19.7988	19.6645	19.8033	19.7106	10	12	12	11	10	9	13	13	13	12	14	13	15	15	15	15	15	15	15	15	15
>ENSSSCP00000012423	11	0.872212	0.0407132	PCCB	none	Sus scrofa propionyl CoA carboxylase, beta polypeptide (PCCB), nuclear gene encoding mitochondrial protein, mRNA. [Source:RefSeq mRNA;Acc:NM_213901]|13|ENSSSCG00000011653|ENSSSCT00000012757	250819	248650	238790	261616	254220	218767	225882	200455	273228	206409	217224	189406	17.9238	17.8654	17.9971	17.9557	17.7852	17.6129	18.0597	17.6551	17.7288	17.5311	6	6	7	7	5	2	12	9	8	10	9	8	11	11	11	11	11	11	11	11	11
>ENSSSCP00000020171	8	0.861627	0.00382319	PCNA	none	proliferating cell nuclear antigen [Source:HGNC Symbol;Acc:8729]|17|ENSSSCG00000030642|ENSSSCT00000032581	575964	565173	583662	573058	581963	496266	517808	443185	482197	507155	476013	551241	19.1083	19.1548	19.1283	19.1506	18.9821	18.7575	18.8793	18.9521	18.8606	19.0723	8	8	8	8	7	8	8	8	8	8	8	8	8	8	8	8	8	8	8	8	8
>ENSSSCP00000023862	7	0.844394	0.000161384	PDAP1	none	PDGFA associated protein 1 [Source:HGNC Symbol;Acc:14634]|3|ENSSSCG00000023257|ENSSSCT00000024950	562728	578580	555804	538410	578120	475164	451557	496462	464011	492722	484509	461723	19.1422	19.0842	19.0383	19.141	18.7845	18.9213	18.8238	18.9104	18.8862	18.8167	5	7	6	5	4	4	7	7	5	7	6	6	7	7	7	7	7	7	7	7	7
>ENSSSCP00000005064	33	0.928684	0.00101789	PDIA3	none	Sus scrofa protein disulfide isomerase family A, member 3 (PDIA3), mRNA. [Source:RefSeq mRNA;Acc:NM_001195112]|1|ENSSSCG00000004700|ENSSSCT00000005190	31059106	31323904	31013232	31011786	30887502	28844102	28670284	28832024	29768072	29583026	28732016	27479190	24.9008	24.8864	24.8863	24.8805	24.7731	24.7812	24.8273	24.8183	24.7762	24.7118	30	32	31	32	28	28	32	31	32	32	31	31	33	33	33	33	33	33	33	33	33
>ENSSSCP00000016385	29	0.880786	0.0155625	PDIA4	none	protein disulfide isomerase family A, member 4 [Source:HGNC Symbol;Acc:30167]|9|ENSSSCG00000015453|ENSSSCT00000016835	4.30919e+06	3.95244e+06	4.55135e+06	4435851	4.29713e+06	3.79548e+06	3.799e+06	3.55021e+06	4.0902e+06	3779186	3.96452e+06	3.58974e+06	21.9143	22.1179	22.0808	22.0349	21.8572	21.7595	21.9637	21.8496	21.9187	21.7754	29	29	27	27	27	26	29	29	28	28	28	27	29	29	29	29	29	29	29	29	29
>ENSSSCP00000015185	10	0.818145	0.0434823	PDLIM4	none	PDZ and LIM domain 4 [Source:HGNC Symbol;Acc:16501]|2|ENSSSCG00000014274|ENSSSCT00000015597	863043	853334	733728	995820	869289	706094	600018	725514	681669	822232	621714	785420	19.7028	19.4849	19.9255	19.7295	19.1946	19.4686	19.3787	19.6492	19.2459	19.5831	10	9	10	9	6	8	9	10	10	10	10	11	10	10	10	10	10	10	10	10	10
>ENSSSCP00000020415	3	1.46139	0.00235629	PECR	none	peroxisomal trans-2-enoyl-CoA reductase [Source:HGNC Symbol;Acc:18281]|15|ENSSSCG00000022758|ENSSSCT00000028863	8922.73	7829.67	9936.86	9704.99	8219.41	13039.6	13136.7	10428.5	14374.6	13110.7	15530.1	11656.9	12.9347	13.2786	13.2445	13.0048	13.6813	13.3483	13.8112	13.6785	13.9228	13.5089	1	0	2	1	0	0	2	2	3	3	2	2	3	3	3	3	3	3	3	3	3
>ENSSSCP00000011206	12	1.14546	0.0227881	PGAM1	none	phosphoglycerate mutase 1 (brain) [Source:HGNC Symbol;Acc:8888]|14|ENSSSCG00000010517|ENSSSCT00000011507	21241686	22939788	21158928	19259514	21608514	2.43316e+07	24846198	24273608	21476392	24649530	25080602	25662998	24.4513	24.3348	24.1991	24.3651	24.5665	24.5329	24.3562	24.5551	24.5801	24.6132	14	16	15	15	12	13	16	13	15	15	16	14	12	12	12	12	12	12	12	12	12
>ENSSSCP00000022919	2	1.21291	0.00693081	PIP4K2B	none	phosphatidylinositol-5-phosphate 4-kinase, type II, beta [Source:HGNC Symbol;Acc:8998]|GL896426.1|ENSSSCG00000030279|ENSSSCT00000030134	19090.6	17555.6	20880.5	19575.2	18351	23155.2	27008.7	21018.2	22941.2	23074.2	22216.2	22672.9	14.0996	14.3499	14.2567	14.1636	14.7211	14.3593	14.4857	14.494	14.4393	14.4687	2	3	1	3	0	0	4	3	4	3	3	2	2	2	2	2	2	2	2	2	2
>ENSSSCP00000011906	2	0.732896	0.0243828	PITRM1	none	pitrilysin metallopeptidase 1 [Source:HGNC Symbol;Acc:17663]|10|ENSSSCG00000011157|ENSSSCT00000012219	19247.3	15027.1	19425.4	21260.8	21275.7	14106.2	13548.4	15039	16429.1	14635	15046.8	9939.05	13.8753	14.2457	14.3759	14.3769	13.7258	13.8764	14.004	13.8371	13.8772	13.2789	1	1	1	1	1	1	1	2	2	1	2	0	2	2	2	2	2	2	2	2	2
>ENSSSCP00000002108	46	0.947689	0.0343155	PKM	none	pyruvate kinase, muscle [Source:HGNC Symbol;Acc:9021]|7|ENSSSCG00000001930|ENSSSCT00000002159	118090198	117802408	117411008	121420392	115726984	111912752	111434248	111657504	120794784	111136056	111609264	104844656	26.8118	26.807	26.8554	26.7862	26.7316	26.7345	26.848	26.7278	26.7339	26.6437	40	45	43	44	39	39	44	41	42	45	43	42	46	46	46	46	46	46	46	46	46
>ENSSSCP00000019235	4	1.35555	0.00033193	PLD3	none	phospholipase D family, member 3 [Source:HGNC Symbol;Acc:17158]|6|ENSSSCG00000025109|ENSSSCT00000023881	810861	822112	867901	751623	801808	1.09916e+06	1.08441e+06	1.03998e+06	1139815	1109727	1.1573e+06	1063741	19.649	19.7272	19.5197	19.6129	20.0485	19.9881	20.1204	20.0818	20.1423	20.0207	4	4	4	4	3	4	4	4	4	4	4	4	4	4	4	4	4	4	4	4	4
>ENSSSCP00000002767	3	1.25307	0.0486142	PLD4	none	phospholipase D family, member 4 [Source:HGNC Symbol;Acc:23792]|7|ENSSSCG00000002554|ENSSSCT00000002839	77830.1	79428.7	77808.2	75717.8	78365.9	97526.2	115313	76817.9	99408.6	105544	114658	73415.8	16.2774	16.2476	16.2083	16.2579	16.8152	16.2292	16.6011	16.6875	16.807	16.1638	2	3	3	3	2	1	3	2	3	3	3	3	3	3	3	3	3	3	3	3	3
>ENSSSCP00000008911	2	1.67328	0.00511303	PLEK	none	Pleckstrin; Uncharacterized protein [Source:UniProtKB/TrEMBL;Acc:F1SJ07]|3|ENSSSCG00000008348|ENSSSCT00000009142	15130	14024.5	14357.5	16303.7	15834.4	25316.7	31514.5	18069.5	21655.4	22396.1	21840	36424.7	13.7757	13.8095	13.9929	13.9508	14.9437	14.1413	14.4024	14.451	14.4147	15.1526	2	2	2	2	2	2	4	2	3	3	4	4	2	2	2	2	2	2	2	2	2
>ENSSSCP00000003724	21	0.72782	2.7127e-05	PLOD1	ECM Regulators	procollagen-lysine, 2-oxoglutarate 5-dioxygenase 1 [Source:HGNC Symbol;Acc:9081]|6|ENSSSCG00000003433|ENSSSCT00000003811	590729	592322	611582	553348	605663	429944	450982	458202	448670	398126	438586	385098	19.176	19.2222	19.0778	19.2082	18.7827	18.8056	18.7753	18.6029	18.7425	18.5549	18	21	15	18	14	10	20	21	18	14	18	16	21	21	21	21	21	21	21	21	21
>ENSSSCP00000012459	20	0.924452	0.0143541	PLOD2	ECM Regulators	procollagen-lysine, 2-oxoglutarate 5-dioxygenase 2 [Source:HGNC Symbol;Acc:9082]|13|ENSSSCG00000011689|ENSSSCT00000012797	1.25718e+06	1.2649e+06	1.20872e+06	1.30826e+06	1246861	1.16221e+06	1.17621e+06	1.24116e+06	1197556	1.10019e+06	1102598	1.15553e+06	20.2706	20.2051	20.3192	20.2499	20.1657	20.2433	20.1917	20.0693	20.0725	20.1401	18	20	15	17	12	11	20	20	17	18	18	15	20	20	20	20	20	20	20	20	20
>ENSSSCP00000020951	6	0.780782	0.00208905	PLOD3	ECM Regulators	procollagen-lysine, 2-oxoglutarate 5-dioxygenase 3 [Source:HGNC Symbol;Acc:9083]|GL894574.1|ENSSSCG00000028879|ENSSSCT00000030873	126092	139706	115598	123999	125064	98450	107984	103507	90220.6	87736.6	100199	101053	17.092	16.8188	16.92	16.9323	16.7205	16.6594	16.4612	16.4209	16.6125	16.6248	5	7	4	6	2	3	6	5	3	4	5	4	6	6	6	6	6	6	6	6	6
>ENSSSCP00000017921	5	1.35484	0.00151506	PLPP1	none	phosphatidic acid phosphatase type 2A [Source:HGNC Symbol;Acc:9228]|16|ENSSSCG00000016912|ENSSSCT00000018418	67677.4	69415.2	71882.4	64336.4	65075.7	91692.3	91230.6	103131	103593	84854.3	94026.4	73319.1	16.083	16.1334	15.9733	15.9898	16.4772	16.6541	16.6606	16.3727	16.5208	16.1619	1	1	1	1	1	1	3	3	3	3	3	1	5	5	5	5	5	5	5	5	5
>ENSSSCP00000020530	2	1.41324	0.000142025	PNKD	none	Uncharacterized protein [Source:UniProtKB/TrEMBL;Acc:I3L919]|15|ENSSSCG00000029002|ENSSSCT00000031141	13671.9	14500.3	14408.6	12814.7	12963.8	19321.6	17793.2	19205.8	21176	16800.2	19937.6	21016.5	13.8238	13.8146	13.6455	13.6622	14.119	14.2293	14.3701	14.0362	14.2832	14.3592	1	0	0	0	0	1	1	2	2	2	2	1	2	2	2	2	2	2	2	2	2
>ENSSSCP00000012870	2	1.68587	0.00544644	POFUT2	none	Uncharacterized protein [Source:UniProtKB/TrEMBL;Acc:F1SG35]|13|ENSSSCG00000012088|ENSSSCT00000013222	23700.9	24618.8	22513	26827.4	20844.4	39956.5	26682.4	30020	53336.1	50335.7	41395	37970	14.5875	14.4585	14.7114	14.3474	14.7036	14.8736	15.7028	15.6193	15.3372	15.2126	3	3	3	3	2	1	4	3	4	3	6	3	2	2	2	2	2	2	2	2	2
>ENSSSCP00000000041	2	1.23847	0.0347569	POLDIP3	none	polymerase (DNA-directed), delta interacting protein 3 [Source:HGNC Symbol;Acc:23782]|5|ENSSSCG00000000039|ENSSSCT00000000041	22778.9	25818.9	21197.3	21284.1	22815.1	28211	35015.5	27171.4	22035.9	31900.2	27462.6	25680.4	14.6561	14.3716	14.3775	14.4777	15.0957	14.7298	14.4276	14.9613	14.7452	14.6484	1	1	1	1	0	1	1	2	2	4	3	2	2	2	2	2	2	2	2	2	2
>ENSSSCP00000026013	3	0.8904	0.0164654	POLR1C	none	polymerase (RNA) I polypeptide C, 30kDa [Source:HGNC Symbol;Acc:20194]|7|ENSSSCG00000028007|ENSSSCT00000028506	56213.4	55693	54495.7	60357.9	54307.1	50052.4	46337	44926.3	51484.1	54086	52362.7	51118.4	15.7652	15.7339	15.8813	15.7289	15.4999	15.4553	15.6518	15.723	15.6763	15.6416	3	2	3	3	1	2	2	2	2	2	2	3	3	3	3	3	3	3	3	3	3
>ENSSSCP00000021748	6	0.921184	0.0407293	POLR2C	none	polymerase (RNA) II (DNA directed) polypeptide C, 33kDa [Source:HGNC Symbol;Acc:9189]|6|ENSSSCG00000025454|ENSSSCT00000024584	167432	157379	169622	176530	166196	154235	146962	148497	165373	159551	144047	160984	17.2639	17.372	17.4296	17.3425	17.1651	17.1801	17.3354	17.2837	17.1362	17.2966	5	6	6	5	1	3	6	5	5	5	5	5	6	6	6	6	6	6	6	6	6
>ENSSSCP00000027080	5	0.848316	0.0118587	POLR2E	none	polymerase (RNA) II (DNA directed) polypeptide E, 25kDa [Source:HGNC Symbol;Acc:9192]|2|ENSSSCG00000021472|ENSSSCT00000023998	102512	97232.4	97188.8	113572	102054	86962.3	80210.6	88425.1	82415.2	98807.5	81812.3	90103.1	16.5692	16.5685	16.7932	16.639	16.2915	16.4322	16.3306	16.5923	16.32	16.4593	4	3	4	3	2	3	3	5	3	3	3	4	5	5	5	5	5	5	5	5	5
>ENSSSCP00000009470	11	0.904315	0.0229561	PPID	none	peptidylprolyl isomerase D [Source:HGNC Symbol;Acc:9257]|8|ENSSSCG00000008878|ENSSSCT00000009719	461795	469062	457046	473906	447165	417608	418279	369454	443009	454580	429943	390381	18.8394	18.802	18.8542	18.7704	18.6741	18.495	18.757	18.7942	18.7138	18.5745	6	10	8	7	4	4	9	9	7	9	12	8	11	11	11	11	11	11	11	11	11
>ENSSSCP00000006780	2	3.94336	0.0207815	PPOX	none	Orexin [Source:UniProtKB/TrEMBL;Acc:F1S197]|4|ENSSSCG00000006361|ENSSSCT00000006970	14102.7	11178.2	16038.3	12889.1	16305.4	55612.1	25787	88152.7	90493.8	14573.9	92355.8	22309.6	13.4484	13.9692	13.6539	13.9931	14.6544	16.4277	16.4655	13.8311	16.4949	14.4454	3	5	3	4	2	2	6	2	4	4	7	5	2	2	2	2	2	2	2	2	2
>ENSSSCP00000009105	7	1.0568	0.0338989	PPP1CB	none	Sus scrofa protein phosphatase 1, catalytic subunit, beta isozyme (PPP1CB), mRNA. [Source:RefSeq mRNA;Acc:NM_214184]|3|ENSSSCG00000008540|ENSSSCT00000009345	720306	738939	694348	721582	726356	761221	796745	740986	796540	727806	772961	732286	19.4951	19.4053	19.4608	19.4703	19.6038	19.4991	19.6034	19.4732	19.56	19.482	7	7	6	7	6	6	7	7	7	7	7	7	7	7	7	7	7	7	7	7	7
>ENSSSCP00000010492	3	1.20477	0.0446101	PPP1CC	none	protein phosphatase 1, catalytic subunit, gamma isozyme [Source:HGNC Symbol;Acc:9283]|14|ENSSSCG00000009828|ENSSSCT00000010772	77413.6	89721.3	66516.1	75652.2	77764.7	93265.3	107383	84151.7	89162	88192.5	95121.6	95580.5	16.4532	16.0214	16.2071	16.2468	16.7124	16.3607	16.4441	16.4284	16.5375	16.5444	2	2	2	2	2	2	3	2	2	3	3	2	3	3	3	3	3	3	3	3	3
>ENSSSCP00000015563	9	0.855819	0.00661572	PRKCDBP	none	protein kinase C, delta binding protein [Source:HGNC Symbol;Acc:9400]|9|ENSSSCG00000014633|ENSSSCT00000015984	490872	524794	458142	474411	506139	420097	423732	470265	416403	415828	384532	409823	19.0014	18.8054	18.8558	18.9492	18.6928	18.8431	18.6676	18.6656	18.5527	18.6446	7	8	8	8	5	5	8	8	7	8	9	8	9	9	9	9	9	9	9	9	9
>ENSSSCP00000013355	5	1.23342	0.0012322	PRPS1L1	none	phosphoribosyl pyrophosphate synthetase 1-like 1 [Source:HGNC Symbol;Acc:9463]|X|ENSSSCG00000012560|ENSSSCT00000013733	284697	281584	308312	280598	268293	351152	371690	353850	331454	355274	363675	330967	18.1032	18.234	18.0981	18.0335	18.5037	18.4328	18.3385	18.4386	18.4723	18.3363	5	5	4	5	4	3	4	4	4	4	5	4	5	5	5	5	5	5	5	5	5
>ENSSSCP00000012897	2	1.19049	0.00985951	PRPS2	none	phosphoribosyl pyrophosphate synthetase 2 [Source:HGNC Symbol;Acc:9465]|X|ENSSSCG00000012116|ENSSSCT00000013253	80493.7	74916.5	84231.1	77028.5	85798.9	95826.8	106884	82856.8	104868	93295.2	96549.4	90507.5	16.193	16.3621	16.2331	16.3887	16.7057	16.3383	16.6782	16.5095	16.559	16.4658	11	12	10	11	11	7	12	12	13	13	12	11	2	2	2	2	2	2	2	2	2
>ENSSSCP00000016412	16	0.805306	0.00033237	PRRC2C	none	proline-rich coiled-coil 2C [Source:HGNC Symbol;Acc:24903]|9|ENSSSCG00000015480|ENSSSCT00000016863	245659	228354	247517	252952	253814	197831	181774	211848	204141	203594	184868	200760	17.8009	17.9172	17.9485	17.9534	17.4718	17.6927	17.6392	17.6353	17.4961	17.6151	11	13	13	12	5	8	13	13	10	16	14	13	16	16	16	16	16	16	16	16	16
>ENSSSCP00000014233	17	1.08827	0.00806096	PSMA1	none	Proteasome subunit alpha type [Source:UniProtKB/TrEMBL;Acc:F2Z5L7]|2|ENSSSCG00000013391|ENSSSCT00000014628	2.03675e+06	2.05027e+06	2.11825e+06	1.96039e+06	2.01808e+06	2.21653e+06	2.32403e+06	2.0642e+06	2224143	2.28877e+06	2241163	2156841	20.9674	21.0144	20.9027	20.9446	21.1482	20.9772	21.0848	21.1261	21.0958	21.0405	17	17	17	17	16	15	16	17	17	17	17	16	17	17	17	17	17	17	17	17	17
>ENSSSCP00000020984	10	1.15467	0.0153201	PSMA2	none	Proteasome subunit alpha type [Source:UniProtKB/TrEMBL;Acc:I3LAB6]|18|ENSSSCG00000020769|ENSSSCT00000025651	1.04199e+06	1.11856e+06	948092	1.06728e+06	1.03404e+06	1.20316e+06	1.30152e+06	1.12906e+06	1.13944e+06	1.26604e+06	1.20589e+06	1.17701e+06	20.0932	19.8547	20.0255	19.9799	20.3118	20.1067	20.1199	20.2719	20.2017	20.1667	9	8	9	9	9	8	10	9	11	10	10	10	10	10	10	10	10	10	10	10	10
>ENSSSCP00000027339	3	1.40168	0.00209131	PSMG1	none	proteasome (prosome, macropain) assembly chaperone 1 [Source:HGNC Symbol;Acc:3043]|13|ENSSSCG00000030314|ENSSSCT00000023379	15716.7	16788.5	16563.9	13377.2	16137.1	22029.8	23967	21892.7	18480.8	21365.9	23171.3	23301.2	14.0352	14.0158	13.7075	13.9781	14.5488	14.4182	14.1737	14.383	14.5001	14.5081	2	2	1	1	2	1	3	1	1	3	3	4	3	3	3	3	3	3	3	3	3
>ENSSSCP00000008069	3	1.4561	0.000916445	PSMG3	none	proteasome (prosome, macropain) assembly chaperone 3 [Source:HGNC Symbol;Acc:22420]|3|ENSSSCG00000007556|ENSSSCT00000008288	19020.2	21090.5	19059.4	16518.7	19412.2	27695.3	31428.6	29367.7	23916.4	28346.9	25891.2	27220.9	14.3643	14.2182	14.0118	14.2447	14.9398	14.8419	14.5457	14.7909	14.6602	14.7324	2	1	2	3	3	2	3	3	2	2	2	3	3	3	3	3	3	3	3	3	3
>ENSSSCP00000010218	11	0.911565	0.00774213	PSPC1	none	paraspeckle component 1 [Source:HGNC Symbol;Acc:20320]|11|ENSSSCG00000009569|ENSSSCT00000010490	524217	498492	531405	534740	532231	477858	453462	482545	468009	510634	452850	499646	18.9272	19.0195	19.0285	19.0217	18.7906	18.8803	18.8362	18.9619	18.7887	18.9305	9	12	10	10	6	8	11	10	10	10	10	10	11	11	11	11	11	11	11	11	11
>ENSSSCP00000007183	7	0.873804	0.00613617	PTGFRN	none	|4|ENSSSCG00000006735|ENSSSCT00000007378	89588.3	86334	88198	92998.7	90822.5	78282.6	76857.5	72347	84660.4	85970.2	78598.9	71261.8	16.3976	16.4285	16.5049	16.4708	16.2299	16.1426	16.3694	16.3915	16.2622	16.1208	4	7	6	6	4	3	5	6	6	5	6	6	7	7	7	7	7	7	7	7	7
>ENSSSCP00000002550	6	1.3421	0.000160028	PTGR2	none	Uncharacterized protein [Source:UniProtKB/TrEMBL;Acc:F1S3H7]|7|ENSSSCG00000002351|ENSSSCT00000002615	86329.4	89762.5	88689.5	85906.4	80959.1	115862	120469	109006	106886	123603	104961	130249	16.4538	16.4365	16.3905	16.3049	16.8783	16.7341	16.7057	16.9154	16.6795	16.9909	6	4	3	3	4	1	6	4	5	5	4	6	6	6	6	6	6	6	6	6	6
>ENSSSCP00000001804	29	0.776418	0.00314276	PTK7	none	protein tyrosine kinase 7 [Source:HGNC Symbol;Acc:9618]|7|ENSSSCG00000001660|ENSSSCT00000001851	1.90552e+06	2.15595e+06	1.82461e+06	1.77629e+06	1.86523e+06	1.47948e+06	1367154	1.70257e+06	1.54032e+06	1.34363e+06	1.47364e+06	1.44956e+06	21.0399	20.7992	20.7604	20.8309	20.3827	20.6993	20.5548	20.3577	20.491	20.4672	26	29	27	27	22	19	30	30	25	25	29	25	29	29	29	29	29	29	29	29	29
>ENSSSCP00000021335	3	1.17727	0.0155252	PTPRJ	none	protein tyrosine phosphatase, receptor type, J [Source:HGNC Symbol;Acc:9673]|2|ENSSSCG00000023709|ENSSSCT00000022326	19654.2	20510.1	21200.7	17761.9	19144	23138.2	22286.7	21085.8	26015.4	23183.1	22059.8	24198.3	14.324	14.3718	14.1165	14.2246	14.4439	14.364	14.6671	14.5008	14.4291	14.5626	1	2	2	2	0	1	3	2	3	3	3	3	3	3	3	3	3	3	3	3	3
>ENSSSCP00000017599	3	1.22914	0.0087857	PTPRZ1	none	protein tyrosine phosphatase, receptor-type, Z polypeptide 1 [Source:HGNC Symbol;Acc:9685]|18|ENSSSCG00000016614|ENSSSCT00000018088	37430.6	40370.7	35648	35044.4	38659.2	46007.3	41843.8	48287.8	48115.8	47217.8	52651.9	37926.7	15.301	15.1215	15.0969	15.2385	15.3527	15.5594	15.5542	15.527	15.6842	15.2109	0	1	2	0	0	0	2	2	3	4	2	2	3	3	3	3	3	3	3	3	3
>ENSSSCP00000027236	2	1.63432	0.00137574	PTTG1IP	none	pituitary tumor-transforming 1 interacting protein [Source:HGNC Symbol;Acc:13524]|13|ENSSSCG00000021296|ENSSSCT00000027029	94719.6	107189	103667	81576	86446.2	154803	145141	202553	137035	119088	157941	167058	16.7098	16.6616	16.3159	16.3995	17.1471	17.6279	17.0642	16.8617	17.269	17.35	2	2	2	1	0	1	2	2	2	2	2	1	2	2	2	2	2	2	2	2	2
>ENSSSCP00000028171	13	0.897768	0.00885106	PUF60	none	poly-U binding splicing factor 60KDa [Source:HGNC Symbol;Acc:17042]|GL896135.1|ENSSSCG00000028133|ENSSSCT00000029289	531503	542418	532029	498219	553348	477167	462187	502644	506685	462389	472860	456236	19.049	19.0211	18.9264	19.0778	18.8181	18.9392	18.9507	18.8187	18.8511	18.7994	10	9	8	10	6	8	11	11	11	13	9	9	13	13	13	13	13	13	13	13	13
>ENSSSCP00000012227	2	0.805959	0.00145191	PXK	none	PX domain containing serine/threonine kinase [Source:HGNC Symbol;Acc:23326]|13|ENSSSCG00000011474|ENSSSCT00000012556	136250	144727	133335	132703	134235	109812	107382	92816.5	108482	117260	122593	110337	17.143	17.0247	17.0178	17.0344	16.7124	16.5021	16.7271	16.8394	16.9035	16.7516	1	0	1	0	0	1	0	2	2	1	0	1	2	2	2	2	2	2	2	2	2
>ENSSSCP00000011573	3	0.897493	0.0257195	PYCR2	none	Pyrroline-5-carboxylate reductase [Source:UniProtKB/TrEMBL;Acc:F1S8R2]|10|ENSSSCG00000010855|ENSSSCT00000011877	59167.2	59715.2	60029.4	56631.7	60292.7	53102.2	56566.9	56509.2	50320.3	45352.9	55640.9	54222.9	15.8658	15.8734	15.7893	15.8797	15.7877	15.7862	15.6189	15.4689	15.7639	15.7266	5	6	5	4	4	5	7	5	5	5	7	5	3	3	3	3	3	3	3	3	3
>ENSSSCP00000013849	20	1.07576	0.0427083	PYGB	none	phosphorylase, glycogen; brain [Source:HGNC Symbol;Acc:9723]|GL896323.1|ENSSSCG00000022815|ENSSSCT00000014235	887188	889481	887841	847624	923806	954401	1.0192e+06	898005	1.03228e+06	912967	942288	921667	19.7626	19.7599	19.6931	19.8172	19.959	19.7764	19.9774	19.8002	19.8458	19.8139	20	20	18	19	16	16	20	20	19	19	19	20	20	20	20	20	20	20	20	20	20
>ENSSSCP00000026195	2	1.44203	0.0393275	PZP	ECM Regulators	Uncharacterized protein [Source:UniProtKB/TrEMBL;Acc:I3LQ17]|5|ENSSSCG00000024402|ENSSSCT00000032476	27819.5	34534.6	23998.4	26570.7	26174.3	40116.7	56471.8	26730.8	48311.5	42992.5	31388	34805.6	15.0758	14.5507	14.6976	14.6759	15.7852	14.7062	15.5601	15.3918	14.9379	15.087	1	1	1	1	3	1	3	1	2	2	1	1	2	2	2	2	2	2	2	2	2
>ENSSSCP00000016769	3	0.858189	0.0434165	RAB11FIP1	none	RAB11 family interacting protein 1 (class I) [Source:HGNC Symbol;Acc:30265]|GL893552.1|ENSSSCG00000015823|ENSSSCT00000017231	60541.9	54346.9	62759	67744.1	57317.5	51956.4	48800.4	47331.1	53564.9	56900.7	55488	49653	15.7299	15.9375	16.0478	15.8067	15.5746	15.5305	15.709	15.7962	15.7599	15.5996	2	3	3	3	1	2	3	3	3	4	3	2	3	3	3	3	3	3	3	3	3
>ENSSSCP00000011539	18	0.72127	0.010959	RAB3GAP2	none	RAB3 GTPase activating protein subunit 2 (non-catalytic) [Source:HGNC Symbol;Acc:17168]|10|ENSSSCG00000010824|ENSSSCT00000011842	356379	430775	308295	332136	354311	257046	254353	261019	303064	218043	264247	241550	18.7166	18.234	18.3414	18.4347	17.9565	17.9938	18.2093	17.7343	18.0115	17.882	11	15	14	11	4	8	17	20	15	14	15	15	18	18	18	18	18	18	18	18	18
>ENSSSCP00000015747	8	0.909921	0.0305734	RAB6C	none	RAB6C, member RAS oncogene family [Source:HGNC Symbol;Acc:16525]|9|ENSSSCG00000014828|ENSSSCT00000016180	718739	756728	719282	675361	723584	653996	664413	687661	679260	651486	670200	570955	19.5294	19.4562	19.3653	19.4648	19.3417	19.3913	19.3736	19.3134	19.3542	19.123	10	11	9	9	7	8	9	10	10	9	11	9	8	8	8	8	8	8	8	8	8
>ENSSSCP00000021149	4	1.22393	0.0473987	RAB8B	none	RAB8B, member RAS oncogene family [Source:HGNC Symbol;Acc:30273]|1|ENSSSCG00000026571|ENSSSCT00000026677	38838	33551.2	45038.9	40914.2	35847.7	47535.2	46799.6	41270.4	56101.8	52651.6	44495.9	43891.8	15.0341	15.4589	15.3203	15.1296	15.5142	15.3328	15.7758	15.6842	15.4414	15.4217	2	3	2	2	1	2	3	2	3	3	3	3	4	4	4	4	4	4	4	4	4
>ENSSSCP00000019809	7	1.1575	0.0217206	RCVRN	none	recoverin [Source:HGNC Symbol;Acc:9937]|12|ENSSSCG00000028770|ENSSSCT00000023911	224503	220607	213490	225679	238234	259862	261327	233996	248707	298740	285968	230436	17.7511	17.7038	17.7839	17.862	17.9955	17.8361	17.9241	18.1885	18.1255	17.814	7	6	5	7	5	5	8	7	7	7	8	7	7	7	7	7	7	7	7	7	7
>ENSSSCP00000008954	4	0.859716	0.0252653	REL	none	v-rel avian reticuloendotheliosis viral oncogene homolog [Source:HGNC Symbol;Acc:9954]|3|ENSSSCG00000008388|ENSSSCT00000009185	64700.9	63782.4	60818.3	72695.1	61507.9	55624.5	51923.3	55966.7	53484.5	60340.3	54484.1	57547.7	15.9609	15.8922	16.1496	15.9085	15.6641	15.7723	15.7068	15.8808	15.7335	15.8125	2	4	4	4	0	2	4	4	4	4	4	3	4	4	4	4	4	4	4	4	4
>ENSSSCP00000013601	2	1.16152	0.0117987	RENBP	none	renin binding protein [Source:HGNC Symbol;Acc:9959]|X|ENSSSCG00000012792|ENSSSCT00000013984	50524.1	51914.3	48087.7	47399.2	54695.3	58684.9	61419.6	55149.5	60725.6	58001.1	60777.4	56035.8	15.6638	15.5534	15.5326	15.7391	15.9064	15.7511	15.89	15.8238	15.8912	15.7741	7	8	6	7	5	6	8	8	10	10	10	8	2	2	2	2	2	2	2	2	2
>ENSSSCP00000008794	9	1.17825	0.0238219	RETSAT	none	All-trans-retinol 13,14-reductase; Uncharacterized protein [Source:UniProtKB/TrEMBL;Acc:F1SVB2]|3|ENSSSCG00000008237|ENSSSCT00000009020	145376	158015	145639	130964	146885	171289	177832	166850	183946	148508	195729	154869	17.2697	17.152	16.9988	17.1643	17.4402	17.3482	17.4889	17.1802	17.5785	17.2407	7	9	8	7	2	3	9	9	9	8	11	9	9	9	9	9	9	9	9	9	9
>ENSSSCP00000019829	2	1.16513	0.000951923	RHOG	none	ras homolog family member G [Source:HGNC Symbol;Acc:672]|9|ENSSSCG00000029426|ENSSSCT00000031648	110550	105535	113454	114462	108751	128805	136126	119843	122996	124940	131366	137560	16.6874	16.7917	16.8045	16.7307	17.0546	16.8708	16.9083	16.9309	17.0032	17.0697	1	2	1	2	1	1	2	2	2	2	1	1	2	2	2	2	2	2	2	2	2
>ENSSSCP00000019379	7	0.892216	0.00858517	RPL23A	none	|GL894032.2|ENSSSCG00000029802|ENSSSCT00000023017	2498010	2.38584e+06	2.47846e+06	2.58394e+06	2.54379e+06	2.22876e+06	2.12276e+06	2.00165e+06	2289376	2374176	2.38775e+06	2.19686e+06	21.1861	21.241	21.3011	21.2785	21.0175	20.9328	21.1265	21.179	21.1872	21.067	7	7	7	7	7	7	7	7	7	7	7	7	7	7	7	7	7	7	7	7	7
>ENSSSCP00000012733	6	0.8824	0.0103588	RPL24	none	ribosomal protein L24 [Source:HGNC Symbol;Acc:10325]|13|ENSSSCG00000011952|ENSSSCT00000013078	1.13314e+06	1.20058e+06	1.10499e+06	1.16161e+06	1.0654e+06	999887	990994	1.00308e+06	943864	927059	1.10306e+06	1.03126e+06	20.1953	20.0756	20.1477	20.023	19.9185	19.936	19.8482	19.8223	20.0731	19.976	6	6	6	6	6	6	6	6	6	6	6	6	6	6	6	6	6	6	6	6	6
>ENSSSCP00000023834	2	0.936246	0.0238	RPL29	none	Sus scrofa ribosomal protein L29 (RPL29), mRNA. [Source:RefSeq mRNA;Acc:NM_213950]|13|ENSSSCG00000027573|ENSSSCT00000027316	1.55887e+06	1.63059e+06	1.50018e+06	1534525	1.57018e+06	1.45949e+06	1.50204e+06	1.42403e+06	1.49916e+06	1.46586e+06	1.46307e+06	1.40276e+06	20.637	20.5167	20.5494	20.5825	20.5185	20.4415	20.5157	20.4833	20.4806	20.4198	2	2	2	2	2	2	2	2	2	2	2	2	2	2	2	2	2	2	2	2	2
>ENSSSCP00000009753	7	0.925058	0.023938	RPL34	none	ribosomal protein L34 [Source:HGNC Symbol;Acc:10340]|8|ENSSSCG00000009146|ENSSSCT00000010015	1.28102e+06	1.34085e+06	1.21746e+06	1.30481e+06	1.26095e+06	1.18501e+06	1.18599e+06	1.18972e+06	1.1744e+06	1.13492e+06	1.26886e+06	1.15619e+06	20.3547	20.2154	20.3154	20.2661	20.1777	20.1822	20.1635	20.1142	20.2751	20.1409	7	7	7	7	6	6	7	7	7	7	7	7	7	7	7	7	7	7	7	7	7
>ENSSSCP00000021732	6	0.910445	0.0456782	RPL36	none	ribosomal protein L36 [Source:HGNC Symbol;Acc:13631]|2|ENSSSCG00000030010|ENSSSCT00000028373	1.67849e+06	1.7627e+06	1.67869e+06	1.66043e+06	1.61213e+06	1.52817e+06	1.45977e+06	1.53906e+06	1.59054e+06	1.30777e+06	1.61369e+06	1.65819e+06	20.7494	20.6789	20.6631	20.6205	20.4773	20.5536	20.6011	20.3187	20.6219	20.6612	4	6	5	5	3	4	5	5	6	5	5	4	6	6	6	6	6	6	6	6	6
>ENSSSCP00000018266	2	0.820959	0.0169962	RPL38	none	ribosomal protein L38 [Source:HGNC Symbol;Acc:10349]|12|ENSSSCG00000017239|ENSSSCT00000018768	859551	961522	766708	867928	842046	705656	680297	697940	718949	735084	749166	652503	19.875	19.5483	19.7272	19.6835	19.3758	19.4127	19.4555	19.4875	19.5149	19.3156	2	2	2	2	2	2	2	2	2	2	2	2	2	2	2	2	2	2	2	2	2
>ENSSSCP00000014220	4	0.840413	0.00851709	RPS13	none	40S ribosomal protein S13 [Source:UniProtKB/Swiss-Prot;Acc:P62279]|2|ENSSSCG00000013381|ENSSSCT00000014615	1.23578e+06	1.36147e+06	1.15487e+06	1223508	1.20329e+06	1.03857e+06	1024631	1.03592e+06	1.0262e+06	996310	1.13293e+06	1.01543e+06	20.3767	20.1393	20.2226	20.1985	19.9667	19.9825	19.9689	19.9262	20.1116	19.9537	5	5	5	5	5	5	5	5	5	5	5	5	4	4	4	4	4	4	4	4	4
>ENSSSCP00000009623	7	0.920526	0.0135123	RPS3A	none	ribosomal protein S3A [Source:HGNC Symbol;Acc:10421]|8|ENSSSCG00000009019|ENSSSCT00000009878	2557689	2.55778e+06	2497841	2.54029e+06	2.63485e+06	2.35442e+06	2.45858e+06	2.24235e+06	2.33623e+06	2.27848e+06	2.57365e+06	2.23722e+06	21.2865	21.2523	21.2766	21.3293	21.2294	21.0966	21.1557	21.1196	21.2954	21.0933	14	14	14	14	13	13	14	14	14	14	14	14	7	7	7	7	7	7	7	7	7
>ENSSSCP00000005557	5	0.876857	0.00871601	RPS6	none	ribosomal protein S6 [Source:HGNC Symbol;Acc:10429]|1|ENSSSCG00000005169|ENSSSCT00000005698	2.05479e+06	2.02027e+06	2.12083e+06	2151461	1.92661e+06	1.80176e+06	1675876	1833020	1.7424e+06	1.67676e+06	1.87388e+06	2.00862e+06	20.9461	21.0162	21.0369	20.8776	20.6765	20.8058	20.7326	20.6772	20.8376	20.9378	10	10	10	10	9	9	10	9	10	10	10	10	5	5	5	5	5	5	5	5	5
>ENSSSCP00000017156	2	1.26258	0.0298861	RQCD1	none	RCD1 required for cell differentiation1 homolog (S. pombe) [Source:HGNC Symbol;Acc:10445]|15|ENSSSCG00000016193|ENSSSCT00000017634	6989.03	6777.02	6352.37	6445.95	8380.77	8824.23	10891.1	8404.9	8881.44	9114.58	8496.87	7156.48	12.7264	12.6331	12.6542	13.0329	13.4109	13.037	13.1166	13.154	13.0527	12.805	2	2	2	1	0	1	2	2	2	2	2	1	2	2	2	2	2	2	2	2	2
>ENSSSCP00000023115	45	0.842059	1.85837e-05	RRBP1	none	ribosome binding protein 1 [Source:HGNC Symbol;Acc:10448]|17|ENSSSCG00000024692|ENSSSCT00000026565	2.51118e+06	2.50572e+06	2.5839e+06	2.43025e+06	2524861	2.11456e+06	2072556	2227103	2.12123e+06	2124916	2063158	2.07842e+06	21.2568	21.3011	21.2127	21.2678	20.983	21.0867	21.0165	21.019	20.9764	20.9871	40	44	40	41	34	35	44	42	41	44	43	41	45	45	45	45	45	45	45	45	45
>ENSSSCP00000015710	15	0.921648	0.0179275	RRM1	none	|9|ENSSSCG00000014791|ENSSSCT00000016142	492298	509013	493123	493378	473678	453726	414397	481739	457568	442829	481221	444600	18.9573	18.9116	18.9123	18.8535	18.6607	18.8779	18.8036	18.7564	18.8763	18.7621	11	14	12	13	9	10	13	12	13	14	12	13	15	15	15	15	15	15	15	15	15
>ENSSSCP00000010938	6	0.832555	0.00188493	SAR1A	none	Sus scrofa SAR1 homolog A (S. cerevisiae) (SAR1A), mRNA. [Source:RefSeq mRNA;Acc:NM_001031786]|14|ENSSSCG00000010260|ENSSSCT00000011230	320755	335423	295802	329224	322573	267046	262513	257602	302888	261050	270033	248192	18.3556	18.1743	18.3287	18.2993	18.002	17.9748	18.2084	17.994	18.0428	17.9211	5	7	6	6	4	4	6	5	6	6	6	6	6	6	6	6	6	6	6	6	6
>ENSSSCP00000000381	7	0.899692	0.0405225	SARNP	none	SAP domain containing ribonucleoprotein [Source:HGNC Symbol;Acc:24432]|5|ENSSSCG00000000364|ENSSSCT00000000387	255387	273640	234757	252850	260301	229769	241261	235270	211870	244652	210270	235294	18.0619	17.8408	17.9479	17.9898	17.8802	17.844	17.6928	17.9004	17.6819	17.8441	6	6	7	6	5	4	5	6	6	5	5	5	7	7	7	7	7	7	7	7	7
>ENSSSCP00000009582	14	1.1811	0.0101769	SCARB2	none	Sus scrofa scavenger receptor class B, member 2 (SCARB2), mRNA. [Source:RefSeq mRNA;Acc:NM_001244155]|8|ENSSSCG00000008980|ENSSSCT00000009835	1.56052e+06	1.70713e+06	1.48874e+06	1463529	1.58267e+06	1.84312e+06	1.9792e+06	1.85205e+06	1.91672e+06	1.84774e+06	1.89391e+06	1.56914e+06	20.7031	20.5057	20.481	20.5939	20.9165	20.8207	20.8702	20.8173	20.8529	20.5815	12	13	14	14	11	11	14	13	14	14	14	13	14	14	14	14	14	14	14	14	14
>ENSSSCP00000016281	20	1.25308	0.00542036	SCIN	none	scinderin [Source:HGNC Symbol;Acc:21695]|9|ENSSSCG00000015353|ENSSSCT00000016727	637307	586077	652858	673140	637153	798595	915539	660362	749952	880796	829989	754929	19.1607	19.3164	19.3605	19.2813	19.8043	19.3329	19.5164	19.7484	19.6627	19.526	11	16	16	14	12	9	21	18	18	20	19	18	20	20	20	20	20	20	20	20	20
>ENSSSCP00000006499	5	0.55124	1.12426e-05	SDC2	ECM-affiliated Proteins	syndecan 2 [Source:HGNC Symbol;Acc:10659]|4|ENSSSCG00000006088|ENSSSCT00000006679	163393	162230	168651	145794	176897	90068.7	90366.1	105014	90888.4	75528.7	88109.5	90505.4	17.3077	17.3637	17.1536	17.4326	16.4635	16.6802	16.4718	16.2047	16.427	16.4657	4	5	4	5	4	5	4	5	5	4	4	4	5	5	5	5	5	5	5	5	5
>ENSSSCP00000020635	3	0.619624	0.0145577	SEC24D	none	|8|ENSSSCG00000030024|ENSSSCT00000032140	81935.5	104268	62355.1	83576.2	77542.9	50769.2	77019.7	58967.8	52738.9	39976.7	40699.1	35212.9	16.6699	15.9282	16.3508	16.2427	16.2329	15.8476	15.6866	15.2869	15.3127	15.1038	1	2	1	1	1	1	1	3	2	1	2	1	3	3	3	3	3	3	3	3	3
>ENSSSCP00000005777	3	0.859805	0.0285197	SEC61B	none	Sec61 beta subunit [Source:HGNC Symbol;Acc:16993]|1|ENSSSCG00000005384|ENSSSCT00000005924	423814	451396	395997	389418	458446	364398	352497	356584	394236	341110	396705	345255	18.784	18.5951	18.571	18.8064	18.4273	18.4439	18.5887	18.3799	18.5977	18.3973	3	3	3	3	2	2	3	3	3	3	3	3	3	3	3	3	3	3	3	3	3
>ENSSSCP00000025493	3	1.15483	0.00850277	SEPHS1	none	Uncharacterized protein [Source:UniProtKB/TrEMBL;Acc:I3LN21]|GL894068.1|ENSSSCG00000026582|ENSSSCT00000030446	70103.4	66063.4	67439.6	75461.5	71449.2	80957.5	78456.7	77949.4	82962.3	89747.1	81152.6	75476.8	16.0116	16.0413	16.2035	16.1246	16.2596	16.2503	16.3402	16.4536	16.3083	16.2037	3	3	3	3	1	1	3	3	3	4	3	3	3	3	3	3	3	3	3	3	3
>ENSSSCP00000004109	18	0.878255	0.00231979	SERBP1	none	SERPINE1 mRNA binding protein 1 [Source:HGNC Symbol;Acc:17860]|6|ENSSSCG00000003798|ENSSSCT00000004203	3.29216e+06	3.34816e+06	3.21666e+06	3.31331e+06	3290518	2.89136e+06	2861992	2.84444e+06	2.91283e+06	3.10501e+06	2.6031e+06	3.02077e+06	21.6749	21.6171	21.6598	21.6499	21.4486	21.4397	21.474	21.5662	21.3118	21.5265	16	18	16	17	15	15	18	16	15	18	17	17	18	18	18	18	18	18	18	18	18
>ENSSSCP00000004575	2	0.801295	0.031295	SERINC1	none	Uncharacterized protein [Source:UniProtKB/TrEMBL;Acc:F1SF57]|1|ENSSSCG00000004237|ENSSSCT00000004682	34909.3	29763.9	39956.1	36777.7	33139.7	27972.7	32240.2	26310.1	28380.2	24799.7	24806.5	31299.4	14.8613	15.2861	15.1665	15.0163	14.9766	14.6833	14.7926	14.598	14.5984	14.9338	1	2	2	2	1	1	2	2	1	2	2	2	2	2	2	2	2	2	2	2	2
>ENSSSCP00000006060	9	0.916029	0.0127217	SET	none	SET nuclear oncogene [Source:HGNC Symbol;Acc:10760]|1|ENSSSCG00000005656|ENSSSCT00000006219	2.50196e+06	2.52161e+06	2.51549e+06	2.45164e+06	2.5191e+06	2.29187e+06	2.19255e+06	2.17854e+06	2.31776e+06	2.46527e+06	2.15877e+06	2438318	21.2659	21.2624	21.2253	21.2645	21.0642	21.0549	21.1443	21.2333	21.0418	21.2175	7	9	8	8	6	5	9	10	7	9	10	8	9	9	9	9	9	9	9	9	9
>ENSSSCP00000002715	9	0.903023	0.0237608	SETD3	none	SET domain containing 3 [Source:HGNC Symbol;Acc:20493]|7|ENSSSCG00000002508|ENSSSCT00000002786	153604	154900	142487	156810	160219	138708	144360	138503	123209	136408	145656	144112	17.241	17.1205	17.2587	17.2897	17.1393	17.0796	16.9107	17.0576	17.1522	17.1368	2	6	3	7	3	2	7	7	6	4	7	7	9	9	9	9	9	9	9	9	9
>ENSSSCP00000013846	10	0.856968	0.000888534	SF1	none	splicing factor 1 [Source:HGNC Symbol;Acc:12950]|2|ENSSSCG00000013021|ENSSSCT00000014232	489071	471193	475873	496436	512781	419118	397743	438272	408853	447158	432335	390348	18.846	18.8602	18.9212	18.968	18.6015	18.7415	18.6412	18.7704	18.7218	18.5744	8	9	9	8	5	6	10	9	8	10	10	8	10	10	10	10	10	10	10	10	10
>ENSSSCP00000010674	2	1.48125	0.0121701	SF3A1	none	Splicing factor 3A subunit 1; Uncharacterized protein [Source:UniProtKB/TrEMBL;Acc:F1RFD3]|14|ENSSSCG00000010002|ENSSSCT00000010959	24196.5	24116.2	27634.7	26201.1	18833.8	35841	40955.2	33759.4	35835.1	32184.4	36117.9	36193.9	14.5577	14.7542	14.6773	14.201	15.3218	15.043	15.1291	14.9741	15.1404	15.1435	12	13	10	12	7	8	15	16	14	15	16	18	2	2	2	2	2	2	2	2	2
>ENSSSCP00000027087	2	0.872655	0.00583514	SF3B3	none	Uncharacterized protein [Source:UniProtKB/TrEMBL;Acc:I3LSJ4]|GL896221.1|ENSSSCG00000025323|ENSSSCT00000030710	153580	161469	147000	146301	159551	134022	133250	129265	139073	138860	141494	122193	17.3009	17.1655	17.1586	17.2837	17.0238	16.98	17.0855	17.0833	17.1104	16.8988	0	2	2	2	1	1	2	2	2	3	3	3	2	2	2	2	2	2	2	2	2
>ENSSSCP00000007108	2	0.883496	0.00804333	SF3B4	none	splicing factor 3b, subunit 4, 49kDa [Source:HGNC Symbol;Acc:10771]|4|ENSSSCG00000006665|ENSSSCT00000007303	79964.7	78017.9	79768.8	82634.8	79437.2	70648.4	66329.8	70614.6	67920.4	81406.2	66758.6	70860.9	16.2515	16.2835	16.3345	16.2775	16.0174	16.1077	16.0516	16.3129	16.0267	16.1127	1	2	2	2	1	1	2	3	1	3	1	2	2	2	2	2	2	2	2	2	2
>ENSSSCP00000009608	2	1.71951	0.0213142	SFRP2	Secreted Factors	secreted frizzled-related protein 2 [Source:HGNC Symbol;Acc:10777]|8|ENSSSCG00000009004|ENSSSCT00000009861	18506.6	13183.3	15485.7	25141.4	20216.1	31822.3	30265.7	30786.7	33039.9	41148.7	26997.7	28695.1	13.6864	13.9187	14.6178	14.3032	14.8854	14.91	15.0119	15.3286	14.7205	14.8085	0	0	0	0	3	0	3	1	2	2	2	2	2	2	2	2	2	2	2	2	2
>ENSSSCP00000014315	9	0.907122	0.0456554	SGTA	none	small glutamine-rich tetratricopeptide repeat (TPR)-containing, alpha [Source:HGNC Symbol;Acc:10819]|2|ENSSSCG00000013467|ENSSSCT00000014712	919222	886524	887567	994370	908428	833846	805807	762555	903997	909407	769187	852122	19.7578	19.7595	19.9234	19.793	19.6201	19.5405	19.786	19.7946	19.553	19.7007	8	9	9	8	8	8	8	9	9	8	8	8	9	9	9	9	9	9	9	9	9
>ENSSSCP00000007389	6	0.856652	0.00668911	SH3GLB1	none	Sus scrofa SH3-domain GRB2-like endophilin B1 (SH3GLB1), mRNA. [Source:RefSeq mRNA;Acc:NM_001168421]|4|ENSSSCG00000006930|ENSSSCT00000007592	242024	238260	228307	256003	245526	207330	194052	215417	199303	238965	187109	209137	17.8622	17.8006	17.9658	17.9055	17.5661	17.7168	17.6046	17.8664	17.5135	17.6741	6	7	6	7	4	5	7	7	6	6	6	6	6	6	6	6	6	6	6	6	6
>ENSSSCP00000020261	6	1.19972	0.00163905	SIRT2	none	sirtuin 2 [Source:HGNC Symbol;Acc:10886]|6|ENSSSCG00000026794|ENSSSCT00000022319	182111	185088	179268	171880	192211	218483	240336	195383	233144	215913	208083	218038	17.4978	17.4518	17.391	17.5523	17.8747	17.5759	17.8309	17.7201	17.6668	17.7342	3	4	4	4	3	3	4	5	4	5	7	4	6	6	6	6	6	6	6	6	6
>ENSSSCP00000017842	9	1.32821	0.0119182	SLC1A3	none	solute carrier family 1 (glial high affinity glutamate transporter), member 3 [Source:HGNC Symbol;Acc:10941]|16|ENSSSCG00000016841|ENSSSCT00000018338	960247	833119	1.06172e+06	951644	994509	1.27541e+06	1.16382e+06	988256	1.56077e+06	1.39827e+06	1.38904e+06	1.15229e+06	19.6682	20.018	19.8601	19.9236	20.1504	19.9145	20.5738	20.4152	20.4057	20.1361	8	10	10	8	6	8	10	10	9	9	10	9	9	9	9	9	9	9	9	9	9
>ENSSSCP00000012119	3	1.32072	0.0493282	SLC25A20	none	solute carrier family 25 (carnitine/acylcarnitine translocase), member 20 [Source:HGNC Symbol;Acc:1421]|13|ENSSSCG00000011366|ENSSSCT00000012444	26869.2	24600.3	29381.5	21750.1	31745	35486.7	41633.1	39887.9	36939.8	25908.7	39199.5	29351.1	14.5864	14.8426	14.4087	14.9542	15.3454	15.2837	15.1729	14.6611	15.2585	14.8411	0	3	0	1	0	0	2	3	1	2	3	1	3	3	3	3	3	3	3	3	3
>ENSSSCP00000011968	5	0.850407	0.0169442	SLC4A7	none	solute carrier family 4, sodium bicarbonate cotransporter, member 7 [Source:HGNC Symbol;Acc:11033]|13|ENSSSCG00000011218|ENSSSCT00000012285	71687.7	71276.2	72221.5	73445.3	69807.8	60963.7	57685.9	60741.5	62645.1	52435.8	74621.1	57652.8	16.1211	16.1401	16.1644	16.0911	15.8159	15.8904	15.9349	15.6783	16.1873	15.8151	3	4	5	3	1	2	6	5	4	3	4	4	5	5	5	5	5	5	5	5	5
>ENSSSCP00000004618	2	0.768467	0.0139438	SMAP1	none	small ArfGAP 1 [Source:HGNC Symbol;Acc:19651]|1|ENSSSCG00000004276|ENSSSCT00000004726	66618.9	77883.9	61977.2	58701.6	67912.9	51194.5	55500	48933.4	50198.5	52571.3	57161.4	42802.1	16.249	15.9194	15.8411	16.0514	15.7602	15.5785	15.6154	15.682	15.8028	15.3854	1	1	2	1	0	1	2	1	1	1	2	2	2	2	2	2	2	2	2	2	2
>ENSSSCP00000010743	2	0.798229	0.0282434	SMARCB1	none	SWI/SNF related, matrix associated, actin dependent regulator of chromatin, subfamily b, member 1 [Source:HGNC Symbol;Acc:11103]|14|ENSSSCG00000010070|ENSSSCT00000011031	31666.8	29055.3	28335.7	36438.8	32837.4	25277.4	32219.5	28035.8	24534.8	21933.5	22783.4	22157.1	14.8265	14.7903	15.1532	15.0031	14.9756	14.775	14.5825	14.4208	14.4757	14.4355	0	1	1	1	1	0	2	1	1	0	1	1	2	2	2	2	2	2	2	2	2
>ENSSSCP00000011319	7	1.20579	0.0202992	SMC3	none	structural maintenance of chromosomes 3 [Source:HGNC Symbol;Acc:2468]|14|ENSSSCG00000010625|ENSSSCT00000011621	47713	43946.8	48384.6	52825.6	45695.2	57532.1	59130.7	51595.7	55470.1	69867	49831.3	59297.9	15.4235	15.5623	15.6889	15.4798	15.8516	15.655	15.7594	16.0923	15.6048	15.8557	0	6	4	3	0	1	6	5	5	4	5	4	7	7	7	7	7	7	7	7	7
>ENSSSCP00000026180	2	0.594777	0.0318906	SMNDC1	none	survival motor neuron domain containing 1 [Source:HGNC Symbol;Acc:16900]|14|ENSSSCG00000030507|ENSSSCT00000028296	52239	60878.5	42001.4	67668.5	38407.7	31070.6	28991.3	26790.3	30334.7	35773.1	31067.4	33466.7	15.8936	15.3582	16.0462	15.2291	14.8233	14.7094	14.8887	15.1266	14.9231	15.0304	1	2	1	0	0	0	1	2	2	3	3	1	2	2	2	2	2	2	2	2	2
>ENSSSCP00000003248	6	0.946171	0.0270106	SNRPA	none	Sus scrofa small nuclear ribonucleoprotein polypeptide A (SNRPA), mRNA. [Source:RefSeq mRNA;Acc:NM_001077222]|6|ENSSSCG00000002998|ENSSSCT00000003330	312434	314960	314089	304015	316670	295616	299398	320778	289328	287851	284160	292178	18.2648	18.2608	18.2138	18.2726	18.1917	18.2912	18.1423	18.135	18.1163	18.1565	6	6	6	5	5	6	6	6	6	6	5	6	6	6	6	6	6	6	6	6	6
>ENSSSCP00000004913	3	1.13235	0.0225361	SNX1	none	Uncharacterized protein [Source:UniProtKB/TrEMBL;Acc:F1S0A3]|1|ENSSSCG00000004556|ENSSSCT00000005033	53854	51277.4	54612.9	53777.3	55748.2	60981.5	71783.3	58070.2	55489.2	57631.3	62792.3	60122.7	15.646	15.737	15.7147	15.7666	16.1314	15.8255	15.7599	15.8146	15.9383	15.8756	11	15	13	15	9	10	16	14	13	14	17	13	3	3	3	3	3	3	3	3	3
>ENSSSCP00000027024	4	1.2154	0.0274359	SNX9	none	sorting nexin 9 [Source:HGNC Symbol;Acc:14973]|1|ENSSSCG00000030535|ENSSSCT00000030285	38754.4	41702	33178.3	39082.4	41054.9	47101.9	57353.7	43232.2	41974.3	47855.6	44455.1	47740.7	15.3478	15.018	15.2542	15.3253	15.8076	15.3998	15.3572	15.5464	15.4401	15.5429	2	2	1	2	1	2	4	3	3	4	4	2	4	4	4	4	4	4	4	4	4
>ENSSSCP00000010276	6	1.12931	0.0237532	SORBS3	none	Uncharacterized protein [Source:UniProtKB/TrEMBL;Acc:F1RMA6]|14|ENSSSCG00000009626|ENSSSCT00000010552	99180.9	90798.1	100583	106299	99043.3	112006	108992	103593	113557	123558	113617	108719	16.4704	16.618	16.6978	16.5958	16.7339	16.6606	16.7931	16.9148	16.7938	16.7302	2	4	2	3	1	0	4	4	3	6	4	4	6	6	6	6	6	6	6	6	6
>ENSSSCP00000007286	3	0.674011	0.00375101	SORT1	none	Uncharacterized protein [Source:UniProtKB/TrEMBL;Acc:F1S5Z7]|4|ENSSSCG00000006831|ENSSSCT00000007482	42542.1	36557.6	48964.6	39933.4	44712.9	28673.9	27200	25809	32716.1	28943.2	28685.7	28689.2	15.1579	15.5795	15.2853	15.4484	14.7313	14.6556	14.9977	14.8209	14.808	14.8082	2	4	3	2	2	2	3	2	2	2	3	2	3	3	3	3	3	3	3	3	3
>ENSSSCP00000010726	18	0.880428	0.0116261	SPECC1L	none	Uncharacterized protein [Source:UniProtKB/TrEMBL;Acc:F1RLS1]|14|ENSSSCG00000010053|ENSSSCT00000011014	258608	242007	258339	256423	277665	227686	215622	212156	234727	241193	244057	218361	17.8847	17.9789	17.9682	18.083	17.7181	17.6948	17.8406	17.8798	17.8969	17.7364	7	12	10	8	0	1	10	11	8	13	14	9	18	18	18	18	18	18	18	18	18
>ENSSSCP00000009825	11	0.621374	0.00540748	SPP1	ECM Glycoproteins	Sus scrofa secreted phosphoprotein 1 (SPP1), mRNA. [Source:RefSeq mRNA;Acc:NM_214023]|8|ENSSSCG00000009216|ENSSSCT00000010091	207341	203684	220988	240156	164534	128836	148825	79419	121039	160906	130380	132447	17.636	17.7536	17.8736	17.328	17.1833	16.2772	16.8851	17.2959	16.9924	17.0151	9	10	10	10	5	4	9	6	7	10	7	8	11	11	11	11	11	11	11	11	11
>ENSSSCP00000006058	137	1.09023	0.00906356	SPTAN1	none	Uncharacterized protein [Source:UniProtKB/TrEMBL;Acc:F1RR78]|1|ENSSSCG00000005654|ENSSSCT00000006217	1.91559e+07	18962180	19984056	19319596	18357898	20884428	20106230	20873084	21007144	21497046	21043474	20779590	24.1766	24.2523	24.2036	24.1299	24.2611	24.3151	24.3244	24.3576	24.3269	24.3087	125	132	128	129	105	112	135	138	132	134	132	130	137	137	137	137	137	137	137	137	137
>ENSSSCP00000025944	8	0.852872	0.0234235	SRM	none	spermidine synthase [Source:HGNC Symbol;Acc:11296]|6|ENSSSCG00000027689|ENSSSCT00000029896	700172	724906	627619	764496	683666	597157	516389	577474	601871	607701	654282	625224	19.4674	19.2595	19.5442	19.3829	18.9781	19.1394	19.1991	19.213	19.3196	19.254	7	8	8	8	7	7	8	8	8	8	8	8	8	8	8	8	8	8	8	8	8
>ENSSSCP00000012405	5	0.821583	0.0446658	SRPRB	none	signal recognition particle receptor, B subunit [Source:HGNC Symbol;Acc:24085]|13|ENSSSCG00000011639|ENSSSCT00000012739	213380	249120	189347	194852	220203	175310	157377	183036	189350	162634	190489	168973	17.9265	17.5307	17.572	17.7485	17.2639	17.4818	17.5307	17.3113	17.5393	17.3664	5	5	5	5	4	5	5	5	5	5	5	5	5	5	5	5	5	5	5	5	5
>ENSSSCP00000021891	23	0.858486	0.00021119	SRRM2	none	serine/arginine repetitive matrix 2 [Source:HGNC Symbol;Acc:16639]|3|ENSSSCG00000023304|ENSSSCT00000026941	483020	488848	481841	462391	499002	414666	398751	442324	409508	422756	396341	418317	18.899	18.8782	18.8188	18.9287	18.6051	18.7547	18.6435	18.6895	18.5964	18.6742	16	23	21	23	6	12	22	20	21	19	23	20	23	23	23	23	23	23	23	23	23
>ENSSSCP00000018680	12	0.901732	0.0246559	SRSF1	none	Sus scrofa serine/arginine-rich splicing factor 1 (SRSF1), mRNA. [Source:RefSeq mRNA;Acc:NM_001038007]|12|ENSSSCG00000017626|ENSSSCT00000019188	3.21675e+06	3201147	3.11287e+06	3.36649e+06	3.18649e+06	2.90065e+06	2.65729e+06	2922281	3.04635e+06	2.96313e+06	3216157	2.59867e+06	21.6102	21.5698	21.6828	21.6035	21.3415	21.4787	21.5387	21.4987	21.6169	21.3093	12	13	13	12	10	12	13	12	13	12	12	13	12	12	12	12	12	12	12	12	12
>ENSSSCP00000004101	2	0.857868	0.000881362	SRSF11	none	Sus scrofa serine/arginine-rich splicing factor 11 (SRSF11), mRNA. [Source:RefSeq mRNA;Acc:NM_001044587]|6|ENSSSCG00000003791|ENSSSCT00000004195	121846	125069	115548	126559	120209	104528	98400.5	106678	109701	100980	104338	107071	16.9324	16.8181	16.9495	16.8752	16.5864	16.7029	16.7432	16.6237	16.6709	16.7082	1	2	1	2	1	1	2	3	1	2	3	2	2	2	2	2	2	2	2	2	2
>ENSSSCP00000026859	5	0.892934	0.00627732	SRSF2	none	serine/arginine-rich splicing factor 2 [Source:RefSeq peptide;Acc:NP_001070697]|12|ENSSSCG00000023148|ENSSSCT00000025710	573307	545762	596752	591691	559023	511925	522845	497790	523335	512964	527001	487617	19.0579	19.1868	19.1745	19.0925	18.996	18.9252	18.9974	18.9685	19.0074	18.8954	5	5	5	5	5	5	5	5	5	5	5	5	5	5	5	5	5	5	5	5	5
>ENSSSCP00000002510	4	0.866557	0.00742608	SRSF5	none	serine/arginine-rich splicing factor 5 [Source:HGNC Symbol;Acc:10787]|GL892783.2|ENSSSCG00000002312|ENSSSCT00000002574	125259	124221	121774	123309	131733	108544	109550	94576.6	114083	111073	120396	101587	16.9225	16.8938	16.9119	17.0073	16.7412	16.5292	16.7997	16.7612	16.8774	16.6324	4	4	4	4	2	3	4	4	4	4	4	4	4	4	4	4	4	4	4	4	4
>ENSSSCP00000007842	3	0.810376	0.00350377	SRSF6	none	Sus scrofa serine/arginine-rich splicing factor 6 (SRSF6), mRNA. [Source:RefSeq mRNA;Acc:NM_001077217]|17|ENSSSCG00000007362|ENSSSCT00000008057	418614	457190	382630	412009	422626	339234	333638	312453	383010	333056	347556	325693	18.8024	18.5456	18.6523	18.689	18.3479	18.2533	18.547	18.3454	18.4069	18.3132	3	3	3	3	3	3	3	3	3	3	3	3	3	3	3	3	3	3	3	3	3
>ENSSSCP00000001093	5	0.822323	0.000197257	SSR1	none	signal sequence receptor, alpha [Source:HGNC Symbol;Acc:11323]|7|ENSSSCG00000001022|ENSSSCT00000001115	1.04238e+06	1.0351e+06	1.03929e+06	1.00749e+06	1.08764e+06	857173	863030	831980	962567	811252	822989	851219	19.9813	19.9872	19.9423	20.0528	19.7191	19.6662	19.8765	19.6298	19.6505	19.6992	4	5	4	4	3	4	4	6	3	4	5	4	5	5	5	5	5	5	5	5	5
>ENSSSCP00000000076	9	0.867736	0.015743	ST13	none	suppression of tumorigenicity 13 (colon carcinoma) (Hsp70 interacting protein) [Source:HGNC Symbol;Acc:11343]|5|ENSSSCG00000000071|ENSSSCT00000000077	1.65976e+06	1631545	1.76991e+06	1552878	1.68469e+06	1.44023e+06	1.28764e+06	1.31547e+06	1.50114e+06	1.45412e+06	1.66773e+06	1.4153e+06	20.6378	20.7552	20.5665	20.6841	20.2963	20.3271	20.5176	20.4717	20.6695	20.4327	9	9	9	9	7	7	9	9	9	9	9	9	9	9	9	9	9	9	9	9	9
>ENSSSCP00000017010	17	1.29755	0.00706553	STAT1	none	Sus scrofa signal transducer and activator of transcription 1, 91kDa (STAT1), mRNA. [Source:RefSeq mRNA;Acc:NM_213769]|JH118841.1|ENSSSCG00000016057|ENSSSCT00000017482	1.75635e+06	1.72696e+06	1.72546e+06	1.63692e+06	1.93605e+06	2.27894e+06	2.77393e+06	1.96839e+06	2.25623e+06	2.03279e+06	2.61985e+06	2.02248e+06	20.7198	20.7186	20.6426	20.8847	21.4035	20.9086	21.1055	20.955	21.3211	20.9477	22	23	23	24	14	23	27	25	25	25	26	24	17	17	17	17	17	17	17	17	17
>ENSSSCP00000000422	6	1.49974	0.00908453	STAT2	none	signal transducer and activator of transcription 2, 113kDa [Source:HGNC Symbol;Acc:11363]|5|ENSSSCG00000000396|ENSSSCT00000000428	77673.3	62324.2	91395.3	71643.3	85330.5	116490	136778	116669	109923	85690	125972	123908	15.9275	16.4798	16.1285	16.3808	17.0615	16.8321	16.7461	16.3868	16.9427	16.9189	4	3	2	1	1	1	7	4	4	6	7	5	6	6	6	6	6	6	6	6	6
>ENSSSCP00000018439	20	1.28973	0.016772	STAT3	none	Sus scrofa signal transducer and activator of transcription 3 (acute-phase response factor) (STAT3), mRNA. [Source:RefSeq mRNA;Acc:NM_001044580]|12|ENSSSCG00000017403|ENSSSCT00000018944	271566	243580	307021	244088	291574	350245	343702	341327	378594	328684	370657	338507	17.894	18.228	17.897	18.1535	18.3908	18.3808	18.5303	18.3263	18.4997	18.3688	11	15	11	12	4	7	15	16	16	16	19	16	20	20	20	20	20	20	20	20	20
>ENSSSCP00000015711	5	1.34586	0.0184696	STIM1	none	stromal interaction molecule 1 [Source:RefSeq peptide;Acc:NP_001124446]|9|ENSSSCG00000014792|ENSSSCT00000016143	38348.5	31807.4	44612.9	35691.7	41282.1	51611.9	60191.3	55526	54011.4	50510.7	48327.9	41104.3	14.9571	15.4452	15.1233	15.3332	15.8773	15.7609	15.721	15.6243	15.5606	15.327	3	4	3	3	1	2	5	4	4	5	7	4	5	5	5	5	5	5	5	5	5
>ENSSSCP00000025642	21	0.906318	0.0282203	STIP1	none	|2|ENSSSCG00000021620|ENSSSCT00000027308	2.46433e+06	2.33968e+06	2477568	2.54801e+06	2492067	2.23347e+06	1.98875e+06	2.24164e+06	2.33782e+06	2484590	2.2537e+06	2.09431e+06	21.1579	21.2405	21.2809	21.2489	20.9234	21.0961	21.1567	21.2446	21.1039	20.998	18	20	19	19	16	17	20	19	19	21	20	21	21	21	21	21	21	21	21	21	21
>ENSSSCP00000011998	9	1.10893	0.0186659	STK39	none	|13|ENSSSCG00000011253|ENSSSCT00000012320	341675	340629	335237	364122	326711	378893	425193	362230	375418	386276	359141	365098	18.3778	18.3548	18.4741	18.3177	18.6978	18.4665	18.5181	18.5593	18.4542	18.4779	7	7	8	7	5	7	9	8	8	8	8	7	9	9	9	9	9	9	9	9	9
>ENSSSCP00000007298	5	1.14971	0.00842756	STXBP3	none	syntaxin binding protein 3 [Source:HGNC Symbol;Acc:11446]|4|ENSSSCG00000006843|ENSSSCT00000007494	79834.8	85515.5	75966.1	75989.2	81868.4	91786.8	97338	88656.9	96577	86739.3	91798.6	89611.1	16.3839	16.2131	16.2135	16.321	16.5707	16.4359	16.5594	16.4044	16.4862	16.4514	4	5	3	3	3	4	4	4	4	5	4	4	5	5	5	5	5	5	5	5	5
>ENSSSCP00000026363	4	0.920935	0.0251307	SUB1	none	SUB1 homolog (S. cerevisiae) [Source:HGNC Symbol;Acc:19985]|15|ENSSSCG00000022132|ENSSSCT00000023763	988739	1.00922e+06	1.00321e+06	934191	1.00834e+06	910564	898701	869047	1.00496e+06	934160	902795	853719	19.9448	19.9362	19.8334	19.9435	19.7775	19.7291	19.9387	19.8333	19.784	19.7034	4	4	4	4	3	3	4	4	4	4	4	4	4	4	4	4	4	4	4	4	4
>ENSSSCP00000010036	14	0.808248	0.0246123	SUCLA2	none	succinate-CoA ligase, ADP-forming, beta subunit [Source:HGNC Symbol;Acc:11448]|11|ENSSSCG00000009405|ENSSSCT00000010304	829885	950218	774738	732517	862065	670752	602427	746471	749603	656929	644445	624639	19.8579	19.5633	19.4825	19.7174	19.2004	19.5097	19.5158	19.3254	19.2977	19.2527	12	11	11	11	11	11	11	12	15	12	12	9	14	14	14	14	14	14	14	14	14
>ENSSSCP00000012257	16	0.895207	0.00418833	SUCLG2	none	succinate-CoA ligase, GDP-forming, beta subunit [Source:HGNC Symbol;Acc:11450]|13|ENSSSCG00000011501|ENSSSCT00000012586	1.05283e+06	1.06943e+06	1.01688e+06	1.04116e+06	1083837	942498	917168	920917	940996	932838	889925	1053143	20.0284	19.9557	19.9898	20.0477	19.8068	19.8127	19.8438	19.8313	19.7633	20.0063	13	16	14	14	11	13	16	15	16	16	15	16	16	16	16	16	16	16	16	16	16
>ENSSSCP00000004639	16	0.877092	0.000177198	SYNCRIP	none	synaptotagmin binding, cytoplasmic RNA interacting protein [Source:HGNC Symbol;Acc:16918]|1|ENSSSCG00000004294|ENSSSCT00000004748	2.34486e+06	2.39715e+06	2.37686e+06	2.29803e+06	2.30738e+06	2.05665e+06	2078801	2.12005e+06	2.04269e+06	1981569	1.9477e+06	2.16911e+06	21.1929	21.1806	21.132	21.1378	20.9873	21.0157	20.962	20.9182	20.8933	21.0487	14	14	14	13	13	13	16	14	14	15	15	14	16	16	16	16	16	16	16	16	16
>ENSSSCP00000004146	2	0.67922	0.0435103	TACSTD2	none	tumor-associated calcium signal transducer 2 [Source:HGNC Symbol;Acc:11530]|6|ENSSSCG00000003832|ENSSSCT00000004241	64612.3	84299.6	65848.2	61635.4	46665.9	43885.9	37399.2	37393.4	39283	38656.1	39184.2	71399.8	16.3632	16.0069	15.9115	15.5101	15.1907	15.1905	15.2616	15.2384	15.258	16.1236	1	1	1	1	0	1	2	2	1	2	1	2	2	2	2	2	2	2	2	2	2
>ENSSSCP00000016829	6	1.12955	0.0324942	TANC1	none	tetratricopeptide repeat, ankyrin repeat and coiled-coil containing 1 [Source:HGNC Symbol;Acc:29364]|15|ENSSSCG00000015880|ENSSSCT00000017292	45688.8	41470.3	47632.3	45156.9	48495.5	51607.6	49436.6	50317.6	53906.9	51566.9	52278.5	52139.2	15.3398	15.5397	15.4627	15.5656	15.5933	15.6188	15.7182	15.6542	15.6739	15.6701	5	6	4	4	1	1	10	8	11	8	9	5	6	6	6	6	6	6	6	6	6
>ENSSSCP00000001582	9	1.45252	0.0012507	TAP2	none	Sus scrofa transporter 1, ATP-binding cassette, sub-family B (MDR/TAP) (TAP1), mRNA. [Source:RefSeq mRNA;Acc:NM_001044581]|7|ENSSSCG00000025618|ENSSSCT00000001624	104299	108198	95200.5	96293.2	117506	151497	188760	137994	135120	131271	158937	156900	16.7233	16.5387	16.5551	16.8424	17.5262	17.0742	17.0439	17.0022	17.2781	17.2595	3	5	3	6	3	2	10	7	6	8	10	9	9	9	9	9	9	9	9	9	9
>ENSSSCP00000001636	4	1.36501	0.00349905	TAPBP	none	TAP binding protein (tapasin) [Source:HGNC Symbol;Acc:11566]|7|ENSSSCG00000001507|ENSSSCT00000001680	132006	136049	120103	125848	146023	180190	227548	148656	161971	178846	193274	170845	17.0538	16.8739	16.9413	17.1558	17.7958	17.1816	17.3054	17.4484	17.5603	17.3823	3	3	3	3	2	2	5	4	3	3	4	3	4	4	4	4	4	4	4	4	4
>ENSSSCP00000016249	3	1.31057	0.0287154	TFPI2	none	tissue factor pathway inhibitor 2 [Source:HGNC Symbol;Acc:11761]|9|ENSSSCG00000015322|ENSSSCT00000016695	19178.8	21366.1	16192.2	21968.3	17188.7	25135.3	27154.2	19367.3	26288.5	28155.2	23402	26444.7	14.383	13.983	14.4231	14.0692	14.7289	14.2413	14.6821	14.7811	14.5143	14.6907	1	1	1	0	2	0	3	1	3	3	2	3	3	3	3	3	3	3	3	3	3
>ENSSSCP00000011384	6	0.849931	0.0174751	TIAL1	none	|14|ENSSSCG00000010685|ENSSSCT00000011686	186825	186975	168213	204474	187637	158788	138686	166328	158412	170810	168563	149930	17.5125	17.3599	17.6416	17.5176	17.0815	17.3437	17.2733	17.382	17.3629	17.1939	6	7	6	7	5	5	6	8	6	8	7	8	6	6	6	6	6	6	6	6	6
>ENSSSCP00000005639	28	0.923489	0.045153	TJP2	none	tight junction protein 2 [Source:HGNC Symbol;Acc:11828]|1|ENSSSCG00000005247|ENSSSCT00000005781	639332	598588	675858	650338	632545	590416	549912	602382	619110	601604	602140	567348	19.1912	19.3664	19.3108	19.2708	19.0688	19.2003	19.2398	19.1985	19.1997	19.1139	19	25	25	20	10	15	26	26	22	26	28	28	28	28	28	28	28	28	28	28	28
>ENSSSCP00000012474	2	0.688293	6.3918e-05	TM4SF1	none	transmembrane 4 L six family member 1 [Source:HGNC Symbol;Acc:11853]|13|ENSSSCG00000011702|ENSSSCT00000012812	116793	118572	111190	117435	119975	80387.6	79770.6	88067.6	69724	74216.1	81420.8	89126.2	16.8554	16.7627	16.8415	16.8724	16.2836	16.4263	16.0894	16.1794	16.3131	16.4436	2	2	2	2	2	2	2	2	2	2	2	2	2	2	2	2	2	2	2	2	2
>ENSSSCP00000002582	8	0.869506	0.00161954	TMED10	none	transmembrane emp24-like trafficking protein 10 (yeast) [Source:HGNC Symbol;Acc:16998]|7|ENSSSCG00000002382|ENSSSCT00000002649	1.48083e+06	1.51641e+06	1.47845e+06	1.41071e+06	1.51773e+06	1.28759e+06	1.3181e+06	1.28744e+06	1.42724e+06	1.23522e+06	1.25706e+06	1.20045e+06	20.5322	20.4957	20.428	20.5335	20.33	20.2961	20.4448	20.2363	20.2616	20.1951	7	8	8	8	7	7	8	8	7	8	7	8	8	8	8	8	8	8	8	8	8
>ENSSSCP00000014924	5	0.921163	0.0459341	TMED9	none	transmembrane emp24 protein transport domain containing 9 [Source:HGNC Symbol;Acc:24878]|2|ENSSSCG00000014036|ENSSSCT00000015332	1.04797e+06	1123330	1.00606e+06	1.0308e+06	1.03168e+06	965348	913032	957849	956621	1.04273e+06	1.02697e+06	894887	20.0994	19.9403	19.9753	19.9766	19.8003	19.8694	19.8676	19.9919	19.97	19.7713	4	5	5	5	3	4	4	4	5	4	6	4	5	5	5	5	5	5	5	5	5
>ENSSSCP00000016279	4	1.21135	0.0219619	TMEM106B	none	transmembrane protein 106B [Source:HGNC Symbol;Acc:22407]|9|ENSSSCG00000015351|ENSSSCT00000016725	121081	138191	107821	119260	119051	146672	144348	137562	158748	137110	162505	139758	17.0763	16.7183	16.8638	16.8612	17.1392	17.0697	17.2764	17.065	17.3101	17.0926	3	4	3	3	2	2	4	4	4	3	4	4	4	4	4	4	4	4	4	4	4
>ENSSSCP00000022470	3	1.2146	0.00275334	TMEM120A	none	transmembrane protein 120A [Source:HGNC Symbol;Acc:21697]|GL894019.2|ENSSSCG00000021837|ENSSSCT00000026475	21961.1	21512.9	24094.6	20881.1	21355.9	26674	25262.4	27843.9	28302.6	23701.9	26878.4	28054.6	14.3929	14.5564	14.3499	14.3823	14.6247	14.7651	14.7886	14.5327	14.7142	14.7759	2	2	1	2	0	1	3	1	3	3	3	2	3	3	3	3	3	3	3	3	3
>ENSSSCP00000014755	3	1.44358	1.0907e-05	TMEM221	none	Uncharacterized protein [Source:UniProtKB/TrEMBL;Acc:F1S957]|2|ENSSSCG00000013877|ENSSSCT00000015161	143275	138125	140283	150511	144180	206829	193939	196430	231905	202390	221507	194802	17.0756	17.098	17.1995	17.1375	17.5652	17.5837	17.8232	17.6268	17.757	17.5716	2	2	2	2	2	2	2	2	2	3	3	2	3	3	3	3	3	3	3	3	3
>ENSSSCP00000023529	2	1.17277	9.27568e-05	TMEM256	none	TMEM256-PLSCR3 readthrough (NMD candidate) [Source:HGNC Symbol;Acc:49186]|12|ENSSSCG00000029391|ENSSSCT00000031766	21790.4	21821.5	21168.7	21621.8	22549.5	25555.1	25689.4	27236.7	24206.4	26378.4	24773	25047	14.4135	14.3696	14.4002	14.4608	14.6489	14.7333	14.5631	14.6871	14.5965	14.6124	1	1	1	1	0	1	1	1	1	1	1	2	2	2	2	2	2	2	2	2	2
>ENSSSCP00000000950	3	1.13436	0.0462626	TMPO	none	Sus scrofa thymopoietin (TMPO), mRNA. [Source:RefSeq mRNA;Acc:NM_001244228]|5|ENSSSCG00000000887|ENSSSCT00000000971	158659	146134	158009	173014	157480	179978	175921	155131	189590	200828	191575	166820	17.1569	17.2696	17.4005	17.2648	17.4246	17.2431	17.5325	17.6156	17.5475	17.3479	4	6	5	5	4	4	6	5	5	5	5	5	3	3	3	3	3	3	3	3	3
>ENSSSCP00000023189	26	0.755216	0.00230913	TNKS1BP1	none	tankyrase 1 binding protein 1, 182kDa [Source:HGNC Symbol;Acc:19081]|2|ENSSSCG00000028527|ENSSSCT00000032273	660893	587793	713245	640498	702034	499117	445580	530245	527136	489224	462043	540474	19.1649	19.444	19.2888	19.4212	18.7653	19.0163	19.0078	18.9001	18.8177	19.0439	26	32	25	29	9	19	30	28	25	24	26	31	26	26	26	26	26	26	26	26	26
>ENSSSCP00000026158	4	0.719101	0.00013253	TNS1	none	tensin 1 [Source:HGNC Symbol;Acc:11973]|15|ENSSSCG00000027669|ENSSSCT00000024203	62622.4	57310.2	63918.9	64885.7	64374.7	45031.8	44546.8	52948.6	40220.4	46335.2	44124.9	42014.8	15.8065	15.964	15.9856	15.9742	15.443	15.6923	15.2956	15.4998	15.4293	15.3586	4	6	4	6	1	2	2	4	1	1	1	4	4	4	4	4	4	4	4	4	4
>ENSSSCP00000011962	12	0.8692	0.0459787	TOP2B	none	DNA topoisomerase 2 [Source:UniProtKB/TrEMBL;Acc:F1RS45]|13|ENSSSCG00000011213|ENSSSCT00000012279	134897	142753	138249	120660	137923	117252	131411	119221	133715	98507.4	113447	107210	17.1232	17.0769	16.8806	17.0735	17.0037	16.8633	17.0288	16.5879	16.7917	16.7101	9	17	10	18	9	8	17	13	15	11	18	12	12	12	12	12	12	12	12	12	12
>ENSSSCP00000016465	7	1.19131	0.0366	TOR1AIP1	none	torsin A interacting protein 1 [Source:HGNC Symbol;Acc:29456]|9|ENSSSCG00000015530|ENSSSCT00000016918	121809	121538	133687	114777	117233	145112	138418	139594	141527	126382	135597	189157	16.8911	17.0285	16.8085	16.839	17.0787	17.0909	17.1107	16.9474	17.049	17.5292	5	6	4	6	3	4	6	6	6	7	7	5	7	7	7	7	7	7	7	7	7
>ENSSSCP00000010175	15	0.940001	0.0473353	TPP2	none	|11|ENSSSCG00000009528|ENSSSCT00000010446	736508	692926	757286	745152	750669	692318	710284	699808	698096	658933	705519	681269	19.4023	19.5305	19.5072	19.5178	19.438	19.4166	19.4131	19.3298	19.4283	19.3779	19	22	22	22	14	14	24	23	22	21	22	24	15	15	15	15	15	15	15	15	15
>ENSSSCP00000024925	2	1.45005	0.00144426	TRIM25	none	Uncharacterized protein [Source:UniProtKB/TrEMBL;Acc:I3LLF7]|12|ENSSSCG00000029475|ENSSSCT00000028418	34210.1	30477.7	38508.6	31844.9	36009.4	49606.4	58097.4	41883.8	45349	51267.7	54861.3	46179.4	14.8955	15.2329	14.9588	15.1361	15.8262	15.3541	15.4688	15.6458	15.7435	15.495	1	2	0	1	0	1	2	2	2	1	2	2	2	2	2	2	2	2	2	2	2
>ENSSSCP00000020444	3	0.894575	0.00917824	TRMT5	none	tRNA methyltransferase 5 [Source:HGNC Symbol;Acc:23141]|1|ENSSSCG00000024529|ENSSSCT00000027040	74272.6	77333.3	70683.6	71952.5	77121	66442.4	62744	65635.8	73067.2	67113.3	65617.1	64477.2	16.2388	16.1091	16.1348	16.2348	15.9372	16.0022	16.1569	16.0343	16.0018	15.9765	1	2	2	1	0	0	3	2	3	3	2	3	3	3	3	3	3	3	3	3	3
>ENSSSCP00000012480	2	0.647577	0.000145755	TSC22D2	none	TSC22 domain family, member 2 [Source:HGNC Symbol;Acc:29095]|13|ENSSSCG00000011708|ENSSSCT00000012818	30399.4	28723.5	33160	29185.8	30528.4	19686	18552.4	18026	19062.9	18384.6	18551	25538.9	14.8099	15.0172	14.833	14.8979	14.1793	14.1378	14.2185	14.1662	14.1792	14.6404	2	1	2	2	0	0	0	2	0	3	1	1	2	2	2	2	2	2	2	2	2
>ENSSSCP00000022471	3	1.12225	0.0188578	TTC37	none	Uncharacterized protein [Source:UniProtKB/TrEMBL;Acc:I3LEI3]|2|ENSSSCG00000029382|ENSSSCT00000023129	64429	68180.7	65157	59550.5	64828	72305.4	68424.6	75010.5	79304.1	67721.7	73742.1	69629.5	16.0571	15.9916	15.8618	15.9843	16.0622	16.1948	16.2751	16.0473	16.1702	16.0874	2	3	2	2	2	2	3	3	3	3	3	2	3	3	3	3	3	3	3	3	3
>ENSSSCP00000008332	24	0.893576	0.0301452	TUFM	none	Tu translation elongation factor, mitochondrial [Source:HGNC Symbol;Acc:12420]|3|ENSSSCG00000007803|ENSSSCT00000008551	2.66245e+06	2458300	2636975	2.87789e+06	2.67662e+06	2.3791e+06	2.29543e+06	2.4078e+06	2515700	2.48631e+06	2.33483e+06	2.23454e+06	21.2292	21.3305	21.4566	21.352	21.1303	21.1993	21.2625	21.2456	21.1549	21.0915	22	25	22	23	19	20	24	24	24	22	24	24	24	24	24	24	24	24	24	24	24
>ENSSSCP00000012187	8	1.09474	0.000950208	TWF2	none	Uncharacterized protein [Source:UniProtKB/TrEMBL;Acc:F1SIX7]|13|ENSSSCG00000011435|ENSSSCT00000012515	168501	171686	170171	168692	163454	184464	193999	189093	180839	180011	186023	176820	17.3894	17.3766	17.364	17.3185	17.5657	17.5287	17.4643	17.4577	17.5051	17.4319	7	10	9	8	5	6	13	10	10	13	11	13	8	8	8	8	8	8	8	8	8
>ENSSSCP00000008734	3	0.864474	0.0282022	TXNDC9	none	thioredoxin domain containing 9 [Source:HGNC Symbol;Acc:24110]|3|ENSSSCG00000008181|ENSSSCT00000008960	54138.1	48992.8	55799.8	59259.4	52500.5	46801	42358.2	44177.5	46784.3	47864.1	46936.9	52685	15.5803	15.768	15.8548	15.68	15.3704	15.431	15.5137	15.5467	15.5184	15.6851	2	3	3	3	1	2	3	3	3	3	2	3	3	3	3	3	3	3	3	3	3
>ENSSSCP00000012455	7	0.915823	0.0186443	U2SURP	none	U2 snRNP-associated SURP domain containing [Source:HGNC Symbol;Acc:30855]|13|ENSSSCG00000011684|ENSSSCT00000012792	245369	247028	231800	254385	248262	224714	207047	222042	227734	232983	241983	216497	17.9143	17.8225	17.9567	17.9215	17.6596	17.7605	17.797	17.8299	17.8845	17.724	5	5	4	7	2	2	6	5	4	4	7	3	7	7	7	7	7	7	7	7	7
>ENSSSCP00000004662	3	2.09872	0.0472082	UBE2J1	none	ubiquitin-conjugating enzyme E2, J1 [Source:HGNC Symbol;Acc:17598]|1|ENSSSCG00000004317|ENSSSCT00000004773	31000.4	22472.8	25619.5	48794.5	27115	65061.1	86360.4	27409.2	84443.1	80035.9	83599.1	28518.9	14.4559	14.645	15.5744	14.7268	16.3981	14.7424	16.3657	16.2884	16.3512	14.7996	3	2	2	2	1	1	2	3	1	2	2	2	3	3	3	3	3	3	3	3	3
>ENSSSCP00000003786	21	0.749656	0.00677071	UBR4	none	Uncharacterized protein [Source:UniProtKB/TrEMBL;Acc:F1SUQ5]|6|ENSSSCG00000003488|ENSSSCT00000003874	655609	745477	572606	654804	649549	491481	534493	476189	513766	443739	499030	481668	19.5078	19.1272	19.3207	19.3091	19.0278	18.8612	18.9708	18.7594	18.9288	18.8777	12	14	9	14	8	11	17	18	15	14	19	16	21	21	21	21	21	21	21	21	21
>ENSSSCP00000020152	5	0.868413	0.0217379	UNC119B	none	unc-119 homolog B (C. elegans) [Source:HGNC Symbol;Acc:16488]|14|ENSSSCG00000020716|ENSSSCT00000028269	85342.9	82449.6	85759.3	90995.9	82166.8	74112.9	66966	70311.7	80867.4	73218.5	66428	86885.6	16.3312	16.388	16.4735	16.3263	16.0311	16.1015	16.3033	16.1599	16.0195	16.4068	3	5	5	3	0	2	5	4	5	4	3	5	5	5	5	5	5	5	5	5	5
>ENSSSCP00000013709	2	1.3743	0.0488925	UNC93B1	none	Uncharacterized protein [Source:UniProtKB/TrEMBL;Acc:F1RVP5]|2|ENSSSCG00000012893|ENSSSCT00000014095	32727.3	36282.2	30847.6	28360.5	35419	44977.1	43717.3	48378.2	49353.5	29142.1	63153	36118.6	15.147	14.9129	14.7916	15.1122	15.4159	15.5621	15.5909	14.8308	15.9466	15.1405	2	2	1	1	0	0	4	3	2	2	1	3	2	2	2	2	2	2	2	2	2
>ENSSSCP00000015200	3	1.25954	0.00662492	UQCRQ	none	ubiquinol-cytochrome c reductase, complex III subunit VII, 9.5kDa [Source:HGNC Symbol;Acc:29594]|2|ENSSSCG00000014289|ENSSSCT00000015612	24150	22742.4	25464.4	22966.4	25426.5	30417.7	36198.2	28569.3	33689.7	25266.8	28746.1	30036.2	14.4731	14.6362	14.4872	14.634	15.1436	14.8022	15.04	14.625	14.8111	14.8744	1	2	2	1	2	1	3	3	2	3	3	3	3	3	3	3	3	3	3	3	3
>ENSSSCP00000009573	27	0.927603	0.0115175	USO1	none	USO1 vesicle transport factor [Source:HGNC Symbol;Acc:30904]|8|ENSSSCG00000008971|ENSSSCT00000009826	1.21689e+06	1.2196e+06	1.23465e+06	1.15971e+06	1.2536e+06	1.12879e+06	1.09454e+06	1.12329e+06	1.18852e+06	1103534	1.15804e+06	1.10483e+06	20.218	20.2357	20.1453	20.2576	20.0619	20.0993	20.1807	20.0737	20.1433	20.0754	22	26	22	24	13	20	25	26	24	26	25	24	27	27	27	27	27	27	27	27	27
>ENSSSCP00000002945	3	1.14552	0.0257164	VAC14	none	Uncharacterized protein [Source:UniProtKB/TrEMBL;Acc:F1S3E8]|6|ENSSSCG00000002729|ENSSSCT00000003024	29651.5	30192.3	27557.4	29045.7	31810.6	33966.2	34829.6	38045.4	32411.6	29502.3	36709	32299.5	14.8819	14.7502	14.826	14.9572	15.088	15.2154	14.9842	14.8485	15.1638	14.9792	6	6	4	6	3	3	7	6	5	6	7	5	3	3	3	3	3	3	3	3	3
>ENSSSCP00000007316	10	0.528537	7.15711e-05	VCAM1	none	vascular cell adhesion molecule 1 [Source:HGNC Symbol;Acc:12663]|4|ENSSSCG00000006862|ENSSSCT00000007515	336247	320619	295685	363868	364817	177719	185521	146015	171757	159038	165312	238670	18.2905	18.1737	18.4731	18.4768	17.5012	17.1558	17.39	17.279	17.3348	17.8647	9	14	13	14	9	11	10	9	8	9	9	11	10	10	10	10	10	10	10	10	10
>ENSSSCP00000010486	5	1.09475	0.0031761	VPS29	none	vacuolar protein sorting 29 homolog (S. cerevisiae) [Source:HGNC Symbol;Acc:14340]|14|ENSSSCG00000009823|ENSSSCT00000010766	379141	375714	381166	373989	385695	415065	443920	394786	421807	425488	404430	399959	18.5193	18.5401	18.5126	18.5571	18.7599	18.5907	18.6862	18.6988	18.6255	18.6095	3	4	3	3	3	3	4	3	4	7	4	6	5	5	5	5	5	5	5	5	5
>ENSSSCP00000025751	8	1.13575	0.0145191	VPS33A	none	Sus scrofa vacuolar protein sorting 33 homolog A (S. cerevisiae) (VPS33A), mRNA. [Source:RefSeq mRNA;Acc:NM_001098604]|14|ENSSSCG00000028005|ENSSSCT00000030351	75502.8	71551.4	77697	76454.2	76308.5	85752.4	89910.2	80309.8	86482.4	81440.9	78241.9	98129.4	16.1267	16.2456	16.2223	16.2196	16.4562	16.2933	16.4001	16.3135	16.2557	16.5824	4	7	5	4	0	2	9	6	5	6	5	5	8	8	8	8	8	8	8	8	8
>ENSSSCP00000017767	2	1.30268	0.0102813	VPS41	none	Uncharacterized protein [Source:UniProtKB/TrEMBL;Acc:F1SSB8]|18|ENSSSCG00000016772|ENSSSCT00000018259	14715.8	16410.4	12839.4	13833.1	15780.4	19170	18483.2	20078.8	19393.2	23014.4	16207.9	17842.5	14.0023	13.6483	13.7558	13.9458	14.1739	14.2934	14.2433	14.4902	13.9844	14.123	2	2	2	2	1	0	3	2	2	2	1	2	2	2	2	2	2	2	2	2	2
>ENSSSCP00000024793	5	1.19306	0.0162179	VPS4A	none	Sus scrofa vacuolar protein sorting 4 homolog A (S. cerevisiae) (VPS4A), mRNA. [Source:RefSeq mRNA;Acc:NM_001243418]|6|ENSSSCG00000025151|ENSSSCT00000026219	76649	73433.4	75140.6	80312.2	77709.9	91447	93376.8	78095	102989	88187.2	104701	81333.1	16.1641	16.1973	16.2933	16.2458	16.5108	16.2529	16.6521	16.4283	16.6759	16.3116	1	3	2	1	2	1	5	4	4	3	5	3	5	5	5	5	5	5	5	5	5
>ENSSSCP00000002723	21	1.11148	0.0491621	WARS	none	Uncharacterized protein [Source:UniProtKB/TrEMBL;Acc:F1SAP4]|7|ENSSSCG00000002516|ENSSSCT00000002794	1.26851e+06	1236386	1.26082e+06	1.22316e+06	1.35368e+06	1.40993e+06	1.65807e+06	1.26738e+06	1412262	1.33909e+06	1.43445e+06	1.3483e+06	20.2377	20.2659	20.2222	20.3685	20.6611	20.2734	20.4296	20.3528	20.4521	20.3627	13	16	15	15	14	13	20	18	16	18	19	17	21	21	21	21	21	21	21	21	21
>ENSSSCP00000000642	2	0.874325	0.0424259	WBP11	none	WW domain binding protein 11 [Source:HGNC Symbol;Acc:16461]|5|ENSSSCG00000000611|ENSSSCT00000000657	35858.3	37928.4	34699.6	34692.4	36112.8	31351.8	37625.4	28599.6	27383.4	29546.5	35256.3	29699.9	15.211	15.0826	15.0823	15.1402	15.1994	14.8037	14.741	14.8507	15.1056	14.8582	0	0	1	1	0	0	1	2	1	2	0	0	2	2	2	2	2	2	2	2	2
>ENSSSCP00000017516	2	1.48063	0.0473047	WDR91	none	WD repeat domain 91 [Source:HGNC Symbol;Acc:24997]|18|ENSSSCG00000016532|ENSSSCT00000018000	11981.2	12074.1	13554.7	7925.27	14370.7	17739.6	21987.7	14391.9	18209.2	17996.8	17016.6	16835.7	13.5596	13.7265	12.9522	13.8108	14.4244	13.813	14.1524	14.1354	14.0547	14.0392	1	0	0	0	0	1	2	2	2	3	3	0	2	2	2	2	2	2	2	2	2
>ENSSSCP00000000801	5	0.936742	0.0294956	WNK1	none	WNK lysine deficient protein kinase 1 [Source:HGNC Symbol;Acc:14540]|5|ENSSSCG00000000753|ENSSSCT00000000817	78302.2	74570.1	78986	78256.5	81396.3	73349	70727.7	75340.7	77332.2	72183.6	74232.3	70277.3	16.1863	16.2693	16.2559	16.3127	16.11	16.2011	16.2388	16.1394	16.1798	16.1008	7	7	7	7	5	6	8	8	7	7	7	7	5	5	5	5	5	5	5	5	5
>ENSSSCP00000019298	4	0.827979	0.035117	YTHDF2	none	YTH domain family, member 2 [Source:HGNC Symbol;Acc:31675]|6|ENSSSCG00000027686|ENSSSCT00000027438	79269.8	67032.5	85617.1	79821.4	84608.4	65633.7	68348.6	63927.4	69013.3	68974.7	68576.2	54962.3	16.0326	16.3856	16.2845	16.3685	16.0606	15.9641	16.0746	16.0738	16.0654	15.7462	3	4	4	5	2	2	6	4	4	4	5	4	4	4	4	4	4	4	4	4	4
>ENSSSCP00000007864	7	0.899986	0.0207327	YWHAB	none	tyrosine 3-monooxygenase/tryptophan 5-monooxygenase activation protein, beta [Source:HGNC Symbol;Acc:12849]|17|ENSSSCG00000007381|ENSSSCT00000008079	7.49377e+06	7.9658e+06	7.58511e+06	7.30697e+06	7117204	6.74429e+06	6369139	6699144	6.19241e+06	6.73627e+06	6.97222e+06	7496565	22.9254	22.8547	22.8008	22.7629	22.6027	22.6755	22.5621	22.6835	22.7332	22.8378	11	11	11	11	10	10	11	11	11	11	11	11	7	7	7	7	7	7	7	7	7
>ENSSSCP00000008214	9	0.936123	0.00556546	YWHAG	none	tyrosine 3-monooxygenase/tryptophan 5-monooxygenase activation protein, gamma [Source:HGNC Symbol;Acc:12852]|3|ENSSSCG00000007692|ENSSSCT00000008433	5.43873e+06	5.32841e+06	5547729	5.39512e+06	5483677	5.09132e+06	5015460	5097040	4.9265e+06	5397054	4.90194e+06	5.20992e+06	22.3453	22.4035	22.3632	22.3867	22.258	22.2812	22.2321	22.3637	22.2249	22.3128	9	8	9	9	9	7	9	8	9	9	9	8	9	9	9	9	9	9	9	9	9
>ENSSSCP00000017495	13	1.17469	0.00233343	ZC3HAV1	none	Sus scrofa zinc finger CCCH-type, antiviral 1 (ZC3HAV1), mRNA. [Source:RefSeq mRNA;Acc:NM_001177489]|18|ENSSSCG00000016512|ENSSSCT00000017979	212639	200222	215730	219169	215433	249784	276952	249741	224118	235963	255197	256731	17.6112	17.7189	17.7417	17.7169	18.0793	17.9301	17.7739	17.8482	17.9613	17.9699	9	11	10	10	4	7	14	15	12	10	16	15	13	13	13	13	13	13	13	13	13
>ENSSSCP00000022618	3	1.20467	0.0228003	ZNF326	none	zinc finger protein 326 [Source:HGNC Symbol;Acc:14104]|4|ENSSSCG00000029402|ENSSSCT00000027730	10760.8	10226.8	10866	11265.4	10685.1	12963.2	13143.6	12583	10541.9	15600.7	14119.6	11790.5	13.3201	13.4075	13.4596	13.3833	13.6821	13.6192	13.3639	13.9293	13.7854	13.5253	2	2	1	1	0	0	3	3	2	3	3	3	3	3	3	3	3	3	3	3	3
>ENSSSCP00000015990	7	0.811825	0.00881498	ZPR1	none	zinc finger protein 259 [Source:HGNC Symbol;Acc:13051]|9|ENSSSCG00000015066|ENSSSCT00000016432	153947	151433	151707	168614	144035	124978	129231	97514.5	136605	137293	121966	127260	17.2083	17.2109	17.3634	17.1361	16.9796	16.5733	17.0596	17.0669	16.8961	16.9574	5	8	5	6	4	6	6	5	6	6	5	7	7	7	7	7	7	7	7	7	7
>ENSSSCP00000004096	4	0.778288	0.000263839	ZRANB2	none	Sus scrofa zinc finger protein 265 (LOC733651), mRNA. [Source:RefSeq mRNA;Acc:NM_001044582]|6|ENSSSCG00000003787|ENSSSCT00000004190	70489.6	76283.9	68072.2	68603.2	68999	54861.2	51182.1	57566.5	60943.3	50848.3	56296.3	52330.8	16.2191	16.0548	16.066	16.0743	15.6434	15.8129	15.8952	15.6339	15.7808	15.6754	3	4	2	3	1	2	3	4	3	3	4	4	4	4	4	4	4	4	4	4	4
[truncated: 5 more columns]
