# Supplementary material for: High glucose treatment promotes extracellular matrix proteome remodeling in Mller glial cells
Source: PeerJ. 2021 May 18;9:e11316. doi: 10.7717/peerj.11316 (PMC8139267; doi:10.7717/peerj.11316)
Supplement: Supplemental Information 3 — The three highest ranking pathways are strongly associated with extracellular matrix function, namely collagen fibril organization, extracellular matrix organization and extracellular structure organization. [file peerj-09-11316-s003.xlsx]

## Sheet: Sheet1
GO-Term	GO-Term id	P-value	# Genes (observed)	# Genes (expected)	# Genes (total)	List of observed genes	Gene ids
collagen fibril organization	GO:0030199	1.11306e-13	10	0.268571	53	PLOD1, COL11A1, COL2A1, COL5A1, CYP1B1, COL5A2, SFRP2, COL12A1, COL3A1, COL1A2	5351, 1301, 1280, 1289, 1545, 1290, 6423, 1303, 1281, 1278
extracellular matrix organization	GO:0030198	2.79519e-12	17	1.81919	359	ITGA8, PLOD1, COL11A1, COL2A1, COL5A1, CYP1B1, ITGAL, COL5A2, SFRP2, COL12A1, VCAM1, FN1, COL3A1, SPP1, ITGA5, ANTXR1, COL1A2	8516, 5351, 1301, 1280, 1289, 1545, 3683, 1290, 6423, 1303, 7412, 2335, 1281, 6696, 3678, 84168, 1278
extracellular structure organization	GO:0043062	2.66725e-11	17	2.0979	414	ITGA8, PLOD1, COL11A1, COL2A1, COL5A1, CYP1B1, ITGAL, COL5A2, SFRP2, COL12A1, VCAM1, FN1, COL3A1, SPP1, ITGA5, ANTXR1, COL1A2	8516, 5351, 1301, 1280, 1289, 1545, 3683, 1290, 6423, 1303, 7412, 2335, 1281, 6696, 3678, 84168, 1278
formation of primary germ layer	GO:0001704	9.82499e-09	9	0.608086	120	ITGA8, COL11A1, COL5A1, POFUT2, COL5A2, SFRP2, COL12A1, FN1, ITGA5	8516, 1301, 1289, 23275, 1290, 6423, 1303, 2335, 3678
interferon-gamma-mediated signaling pathway	GO:0060333	1.7712e-08	8	0.456065	90	TRIM25, HLA-DQB1, GBP1, VCAM1, HLA-DRA, HLA-DRB1, OAS2, NMI	7706, 3119, 2633, 7412, 3122, 3123, 4939, 9111
endodermal cell differentiation	GO:0035987	1.00061e-07	6	0.228032	45	COL11A1, COL5A1, COL5A2, COL12A1, FN1, ITGA5	1301, 1289, 1290, 1303, 2335, 3678
endoderm formation	GO:0001706	1.91283e-07	6	0.253369	50	COL11A1, COL5A1, COL5A2, COL12A1, FN1, ITGA5	1301, 1289, 1290, 1303, 2335, 3678
gastrulation	GO:0007369	3.76047e-07	9	0.927332	183	ITGA8, COL11A1, COL5A1, POFUT2, COL5A2, SFRP2, COL12A1, FN1, ITGA5	8516, 1301, 1289, 23275, 1290, 6423, 1303, 2335, 3678
endoderm development	GO:0007492	2.02249e-06	6	0.374987	74	COL11A1, COL5A1, COL5A2, COL12A1, FN1, ITGA5	1301, 1289, 1290, 1303, 2335, 3678
MHC protein complex assembly	GO:0002396	2.49265e-06	3	0.0304043	6	TAPBP, HLA-DRA, HLA-DRB1	6892, 3122, 3123
response to stress	GO:0006950	2.59421e-06	40	19.9807	3943	UNC93B1, DGKA, PLOD1, RIPOR1, IGFBP7, F3, PLEK, TRIM25, HLA-DQB1, COL5A1, CYP1B1, MX1, ITGAL, SFRP2, ANXA8, STAT2, GBP1, VCAM1, HLA-DRA, DNAJA4, FN1, BAG2, MX2, COL3A1, IFI44L, HLA-DRB1, SPP1, OAS2, TSC22D2, UBE2J1, COPS7B, NDUFA12, MYOF, ITGA5, PTTG1IP, MGMT, DHRS2, NMI, COL1A2, ND4	81622, 1606, 5351, 79567, 3490, 2152, 5341, 7706, 3119, 1289, 1545, 4599, 3683, 6423, 653145, 6773, 2633, 7412, 3122, 55466, 2335, 9532, 4600, 1281, 10964, 3123, 6696, 4939, 9819, 51465, 64708, 55967, 26509, 3678, 754, 4255, 10202, 9111, 1278, 4538
cellular response to interferon-gamma	GO:0071346	3.38566e-06	8	0.901995	178	TRIM25, HLA-DQB1, GBP1, VCAM1, HLA-DRA, HLA-DRB1, OAS2, NMI	7706, 3119, 2633, 7412, 3122, 3123, 4939, 9111
negative regulation of gastrulation	GO:2000542	4.34607e-06	3	0.0354717	7	COL5A1, COL5A2, SFRP2	1289, 1290, 6423
cellular component organization	GO:0016043	4.35912e-06	54	32.4465	6403	ARHGAP25, ITGA8, PLOD1, COL11A1, CDH6, IGFBP7, PLEK, ARHGAP18, GOLGA5, ABCD3, COL2A1, COL5A1, TACSTD2, TAP2, CYP1B1, SF3A1, MX1, ITGAL, GJA1, COL5A2, RAB3GAP2, AKAP8L, SFRP2, ANXA8, PSMG1, TNS1, COL12A1, STAT2, TAPBP, GBP1, VCAM1, PITRM1, HLA-DRA, CTHRC1, DNAJA4, SORT1, FN1, SEC24D, SDC2, MX2, COL3A1, HLA-DRB1, SPP1, COPS7B, NDUFA12, IGF2R, GLDN, MYOF, ITGA5, PECR, ANTXR1, NUP98, COL1A2, ND4	9938, 8516, 5351, 1301, 1004, 3490, 5341, 93663, 9950, 5825, 1280, 1289, 4070, 6891, 1545, 10291, 4599, 3683, 2697, 1290, 25782, 26993, 6423, 653145, 8624, 7145, 1303, 6773, 6892, 2633, 7412, 10531, 3122, 115908, 55466, 6272, 2335, 9871, 6383, 4600, 1281, 3123, 6696, 64708, 55967, 3482, 342035, 26509, 3678, 55825, 84168, 4928, 1278, 4538
supramolecular fiber organization	GO:0097435	5.60739e-06	14	3.33941	659	ARHGAP25, PLOD1, COL11A1, PLEK, ARHGAP18, COL2A1, COL5A1, TACSTD2, CYP1B1, COL5A2, SFRP2, COL12A1, COL3A1, COL1A2	9938, 5351, 1301, 5341, 93663, 1280, 1289, 4070, 1545, 1290, 6423, 1303, 1281, 1278
response to interferon-gamma	GO:0034341	7.42766e-06	8	1.00334	198	TRIM25, HLA-DQB1, GBP1, VCAM1, HLA-DRA, HLA-DRB1, OAS2, NMI	7706, 3119, 2633, 7412, 3122, 3123, 4939, 9111
cell-substrate adhesion	GO:0031589	8.89263e-06	10	1.72798	341	ITGA8, JAG1, TACSTD2, ITGAL, GBP1, VCAM1, FN1, COL3A1, ITGA5, ANTXR1	8516, 182, 4070, 3683, 2633, 7412, 2335, 1281, 3678, 84168
cellular component organization or biogenesis	GO:0071840	1.08969e-05	54	33.3434	6580	ARHGAP25, ITGA8, PLOD1, COL11A1, CDH6, IGFBP7, PLEK, ARHGAP18, GOLGA5, ABCD3, COL2A1, COL5A1, TACSTD2, TAP2, CYP1B1, SF3A1, MX1, ITGAL, GJA1, COL5A2, RAB3GAP2, AKAP8L, SFRP2, ANXA8, PSMG1, TNS1, COL12A1, STAT2, TAPBP, GBP1, VCAM1, PITRM1, HLA-DRA, CTHRC1, DNAJA4, SORT1, FN1, SEC24D, SDC2, MX2, COL3A1, HLA-DRB1, SPP1, COPS7B, NDUFA12, IGF2R, GLDN, MYOF, ITGA5, PECR, ANTXR1, NUP98, COL1A2, ND4	9938, 8516, 5351, 1301, 1004, 3490, 5341, 93663, 9950, 5825, 1280, 1289, 4070, 6891, 1545, 10291, 4599, 3683, 2697, 1290, 25782, 26993, 6423, 653145, 8624, 7145, 1303, 6773, 6892, 2633, 7412, 10531, 3122, 115908, 55466, 6272, 2335, 9871, 6383, 4600, 1281, 3123, 6696, 64708, 55967, 3482, 342035, 26509, 3678, 55825, 84168, 4928, 1278, 4538
cytokine-mediated signaling pathway	GO:0019221	1.77765e-05	14	3.69919	730	F3, TRIM25, HLA-DQB1, MX1, STAT2, GBP1, VCAM1, HLA-DRA, FN1, MX2, HLA-DRB1, OAS2, NMI, COL1A2	2152, 7706, 3119, 4599, 6773, 2633, 7412, 3122, 2335, 4600, 3123, 4939, 9111, 1278
response to organic substance	GO:0010033	2.37755e-05	33	16.2359	3204	LTBP1, ITGA8, IGFBP7, F3, PLPP1, JAG1, TRIM25, HLA-DQB1, ABCD3, COL2A1, CYP1B1, MX1, COL5A2, SFRP2, STAT2, GBP1, VCAM1, HLA-DRA, SORT1, FN1, MX2, COL3A1, HLA-DRB1, SPP1, OAS2, UBE2J1, IGF2R, MYOF, ITGA5, MGMT, NMI, COL1A2, ND4	4052, 8516, 3490, 2152, 8611, 182, 7706, 3119, 5825, 1280, 1545, 4599, 1290, 6423, 6773, 2633, 7412, 3122, 6272, 2335, 4600, 1281, 3123, 6696, 4939, 51465, 3482, 26509, 3678, 4255, 9111, 1278, 4538
protein-carbohydrate complex subunit organization	GO:0071823	2.54066e-05	2	0.0101348	2	HLA-DRA, HLA-DRB1	3122, 3123
antigen processing and presentation of polysaccharide antigen via MHC class II	GO:0002505	2.54066e-05	2	0.0101348	2	HLA-DRA, HLA-DRB1	3122, 3123
protein-carbohydrate complex assembly	GO:0065006	2.54066e-05	2	0.0101348	2	HLA-DRA, HLA-DRB1	3122, 3123
polysaccharide assembly with MHC class II protein complex	GO:0002506	2.54066e-05	2	0.0101348	2	HLA-DRA, HLA-DRB1	3122, 3123
defense response to virus	GO:0051607	2.81218e-05	8	1.20604	238	UNC93B1, TRIM25, MX1, STAT2, GBP1, MX2, IFI44L, OAS2	81622, 7706, 4599, 6773, 2633, 4600, 10964, 4939
response to stimulus	GO:0050896	3.11992e-05	66	46.3716	9151	LTBP1, UNC93B1, ARHGAP25, ITGA8, IFI44, LMCD1, DGKA, PLOD1, COL11A1, CDH6, RIPOR1, IGFBP7, F3, PLEK, PLPP1, JAG1, ARHGAP18, TRIM25, STIM1, HLA-DQB1, ABCD3, COL2A1, COL5A1, TACSTD2, TAP2, CYP1B1, MX1, ITGAL, GJA1, COL5A2, SFRP2, ANXA8, STAT2, TAPBP, GBP1, VCAM1, HLA-DRA, CTHRC1, DNAJA4, SORT1, FN1, SDC2, BAG2, MX2, COL3A1, IFI44L, HLA-DRB1, SPP1, OAS2, COMMD9, TSC22D2, UBE2J1, COPS7B, NDUFA12, IGF…	4052, 81622, 9938, 8516, 10561, 29995, 1606, 5351, 1301, 1004, 79567, 3490, 2152, 5341, 8611, 182, 93663, 7706, 6786, 3119, 5825, 1280, 1289, 4070, 6891, 1545, 4599, 3683, 2697, 1290, 6423, 653145, 6773, 6892, 2633, 7412, 3122, 115908, 55466, 6272, 2335, 6383, 9532, 4600, 1281, 10964, 3123, 6696, 4939, 29099, 9819, 51465, 64708, 55967, 3482, 26509, 1837, 3678, 754, 5498, 4255, 10202, 9111, 874, 1…
response to virus	GO:0009615	3.73188e-05	9	1.6317	322	UNC93B1, IFI44, TRIM25, MX1, STAT2, GBP1, MX2, IFI44L, OAS2	81622, 10561, 7706, 4599, 6773, 2633, 4600, 10964, 4939
antigen processing and presentation of exogenous peptide antigen	GO:0002478	4.35392e-05	6	0.638491	126	HLA-DQB1, TAP2, TAPBP, HLA-DRA, SEC24D, HLA-DRB1	3119, 6891, 6892, 3122, 9871, 3123
antigen processing and presentation of exogenous antigen	GO:0019884	6.14292e-05	6	0.67903	134	HLA-DQB1, TAP2, TAPBP, HLA-DRA, SEC24D, HLA-DRB1	3119, 6891, 6892, 3122, 9871, 3123
cell adhesion	GO:0007155	6.57738e-05	19	7.10447	1402	ITGA8, CDH6, IGFBP7, PLEK, JAG1, COL5A1, TACSTD2, CYP1B1, ITGAL, SFRP2, COL12A1, GBP1, VCAM1, FN1, COL3A1, SPP1, GLDN, ITGA5, ANTXR1	8516, 1004, 3490, 5341, 182, 1289, 4070, 1545, 3683, 6423, 1303, 2633, 7412, 2335, 1281, 6696, 342035, 3678, 84168
cellular response to organic substance	GO:0071310	6.94764e-05	28	13.3019	2625	LTBP1, ITGA8, IGFBP7, F3, PLPP1, TRIM25, HLA-DQB1, COL2A1, CYP1B1, MX1, COL5A2, SFRP2, STAT2, GBP1, VCAM1, HLA-DRA, SORT1, FN1, MX2, COL3A1, HLA-DRB1, SPP1, OAS2, MYOF, ITGA5, MGMT, NMI, COL1A2	4052, 8516, 3490, 2152, 8611, 7706, 3119, 1280, 1545, 4599, 1290, 6423, 6773, 2633, 7412, 3122, 6272, 2335, 4600, 1281, 3123, 6696, 4939, 26509, 3678, 4255, 9111, 1278
biological adhesion	GO:0022610	7.09872e-05	19	7.14501	1410	ITGA8, CDH6, IGFBP7, PLEK, JAG1, COL5A1, TACSTD2, CYP1B1, ITGAL, SFRP2, COL12A1, GBP1, VCAM1, FN1, COL3A1, SPP1, GLDN, ITGA5, ANTXR1	8516, 1004, 3490, 5341, 182, 1289, 4070, 1545, 3683, 6423, 1303, 2633, 7412, 2335, 1281, 6696, 342035, 3678, 84168
negative regulation of endodermal cell differentiation	GO:1903225	7.58417e-05	2	0.0152022	3	COL5A1, COL5A2	1289, 1290
antigen processing and presentation of peptide antigen	GO:0048002	7.83597e-05	6	0.709434	140	HLA-DQB1, TAP2, TAPBP, HLA-DRA, SEC24D, HLA-DRB1	3119, 6891, 6892, 3122, 9871, 3123
anatomical structure formation involved in morphogenesis	GO:0048646	8.00035e-05	17	5.97445	1179	ITGA8, COL11A1, F3, JAG1, STIM1, COL2A1, COL5A1, POFUT2, CYP1B1, TM4SF1, COL5A2, SFRP2, COL12A1, CTHRC1, FN1, MYOF, ITGA5	8516, 1301, 2152, 182, 6786, 1280, 1289, 23275, 1545, 4071, 1290, 6423, 1303, 115908, 2335, 26509, 3678
substrate adhesion-dependent cell spreading	GO:0034446	8.437e-05	5	0.44593	88	ITGA8, TACSTD2, GBP1, FN1, ANTXR1	8516, 4070, 2633, 2335, 84168
protein-containing complex subunit organization	GO:0043933	9.48361e-05	25	11.356	2241	PLOD1, COL11A1, PLEK, ARHGAP18, COL2A1, COL5A1, CYP1B1, SF3A1, MX1, COL5A2, SFRP2, PSMG1, COL12A1, TAPBP, GBP1, HLA-DRA, FN1, SEC24D, MX2, COL3A1, HLA-DRB1, NDUFA12, NUP98, COL1A2, ND4	5351, 1301, 5341, 93663, 1280, 1289, 1545, 10291, 4599, 1290, 6423, 8624, 1303, 6892, 2633, 3122, 2335, 9871, 4600, 1281, 3123, 55967, 4928, 1278, 4538
cell surface receptor signaling pathway	GO:0007166	0.000110114	30	15.1616	2992	LTBP1, ITGA8, CDH6, F3, PLEK, JAG1, TRIM25, HLA-DQB1, COL2A1, TACSTD2, MX1, ITGAL, SFRP2, STAT2, GBP1, VCAM1, HLA-DRA, CTHRC1, SORT1, FN1, SDC2, MX2, COL3A1, HLA-DRB1, OAS2, IGF2R, MYOF, ITGA5, NMI, COL1A2	4052, 8516, 1004, 2152, 5341, 182, 7706, 3119, 1280, 4070, 4599, 3683, 6423, 6773, 2633, 7412, 3122, 115908, 6272, 2335, 6383, 4600, 1281, 3123, 4939, 3482, 26509, 3678, 9111, 1278
regulation of anatomical structure morphogenesis	GO:0022603	0.00013131	16	5.61466	1108	F3, JAG1, ARHGAP18, STIM1, COL5A1, TACSTD2, CYP1B1, COL5A2, SFRP2, STAT2, GBP1, CTHRC1, FN1, SDC2, SPP1, ITGA5	2152, 182, 93663, 6786, 1289, 4070, 1545, 1290, 6423, 6773, 2633, 115908, 2335, 6383, 6696, 3678
response to wounding	GO:0009611	0.000142078	12	3.39515	670	DGKA, RIPOR1, F3, PLEK, COL5A1, ANXA8, FN1, COL3A1, SPP1, MYOF, ITGA5, COL1A2	1606, 79567, 2152, 5341, 1289, 653145, 2335, 1281, 6696, 26509, 3678, 1278
MHC class II protein complex assembly	GO:0002399	0.000151433	2	0.0202695	4	HLA-DRA, HLA-DRB1	3122, 3123
integrin-mediated signaling pathway	GO:0007229	0.000161982	5	0.511806	101	ITGA8, PLEK, ITGAL, COL3A1, ITGA5	8516, 5341, 3683, 1281, 3678
embryonic morphogenesis	GO:0048598	0.000164885	11	2.93402	579	ITGA8, COL11A1, COL2A1, COL5A1, POFUT2, COL5A2, SFRP2, COL12A1, CTHRC1, FN1, ITGA5	8516, 1301, 1280, 1289, 23275, 1290, 6423, 1303, 115908, 2335, 3678
immune system process	GO:0002376	0.000211832	30	15.714	3101	UNC93B1, IFI44, PLEK, JAG1, TRIM25, HLA-DQB1, COL2A1, TAP2, MX1, ITGAL, SFRP2, STAT2, TAPBP, GBP1, VCAM1, HLA-DRA, FN1, SEC24D, SDC2, MX2, COL3A1, IFI44L, HLA-DRB1, OAS2, COMMD9, IGF2R, ITGA5, DHRS2, NMI, COL1A2	81622, 10561, 5341, 182, 7706, 3119, 1280, 6891, 4599, 3683, 6423, 6773, 6892, 2633, 7412, 3122, 2335, 9871, 6383, 4600, 1281, 10964, 3123, 4939, 29099, 3482, 3678, 10202, 9111, 1278
anatomical structure morphogenesis	GO:0009653	0.000221811	27	13.459	2656	ITGA8, COL11A1, CDH6, F3, JAG1, ARHGAP18, STIM1, COL2A1, COL5A1, TACSTD2, POFUT2, CYP1B1, TM4SF1, COL5A2, SFRP2, COL12A1, STAT2, GBP1, CTHRC1, FN1, SDC2, COL3A1, SPP1, MYOF, ITGA5, ANTXR1, COL1A2	8516, 1301, 1004, 2152, 182, 93663, 6786, 1280, 1289, 4070, 23275, 1545, 4071, 1290, 6423, 1303, 6773, 2633, 115908, 2335, 6383, 1281, 6696, 26509, 3678, 84168, 1278
circulatory system development	GO:0072359	0.000228473	16	5.89337	1163	LTBP1, COL11A1, F3, JAG1, STIM1, COL2A1, COL5A1, CYP1B1, GJA1, SFRP2, VCAM1, FN1, COL3A1, ITGA5, ANTXR1, COL1A2	4052, 1301, 2152, 182, 6786, 1280, 1289, 1545, 2697, 6423, 7412, 2335, 1281, 3678, 84168, 1278
regulation of endodermal cell differentiation	GO:1903224	0.000251552	2	0.0253369	5	COL5A1, COL5A2	1289, 1290
dynamin family protein polymerization involved in mitochondrial fission	GO:0003374	0.000251552	2	0.0253369	5	MX1, MX2	4599, 4600
dynamin family protein polymerization involved in membrane fission	GO:0003373	0.000251552	2	0.0253369	5	MX1, MX2	4599, 4600
antigen processing and presentation	GO:0019882	0.000281873	6	0.896927	177	HLA-DQB1, TAP2, TAPBP, HLA-DRA, SEC24D, HLA-DRB1	3119, 6891, 6892, 3122, 9871, 3123
tissue morphogenesis	GO:0048729	0.000293047	11	3.13671	619	ITGA8, COL11A1, JAG1, COL5A1, TACSTD2, POFUT2, SFRP2, COL12A1, CTHRC1, COL3A1, ITGA5	8516, 1301, 182, 1289, 4070, 23275, 6423, 1303, 115908, 1281, 3678
sensory organ morphogenesis	GO:0090596	0.000294437	7	1.27698	252	ITGA8, COL11A1, JAG1, COL2A1, COL5A1, COL5A2, CTHRC1	8516, 1301, 182, 1280, 1289, 1290, 115908
negative regulation of embryonic development	GO:0045992	0.000301068	3	0.131752	26	COL5A1, COL5A2, SFRP2	1289, 1290, 6423
cellular response to chemical stimulus	GO:0070887	0.000321056	30	16.0839	3174	LTBP1, ITGA8, IGFBP7, F3, PLPP1, TRIM25, HLA-DQB1, COL2A1, CYP1B1, MX1, COL5A2, SFRP2, STAT2, GBP1, VCAM1, HLA-DRA, SORT1, FN1, MX2, COL3A1, HLA-DRB1, SPP1, OAS2, MYOF, ITGA5, MGMT, DHRS2, NMI, CBR3, COL1A2	4052, 8516, 3490, 2152, 8611, 7706, 3119, 1280, 1545, 4599, 1290, 6423, 6773, 2633, 7412, 3122, 6272, 2335, 4600, 1281, 3123, 6696, 4939, 26509, 3678, 4255, 10202, 9111, 874, 1278
localization	GO:0051179	0.000355081	50	33.4751	6606	LTBP1, UNC93B1, ARHGAP25, ITGA8, RIPOR1, F3, PLEK, PLPP1, JAG1, ARHGAP18, STIM1, GOLGA5, ABCD3, COL5A1, TACSTD2, TAP2, POFUT2, CYP1B1, ITGAL, GJA1, RAB3GAP2, AKAP8L, SFRP2, ANXA8, TNS1, PNKD, TAPBP, GBP1, VCAM1, PITRM1, CTHRC1, SORT1, FN1, SEC24D, SDC2, MX2, COL3A1, SPP1, OAS2, COMMD9, UBE2J1, IGF2R, ITGA5, PECR, PTTG1IP, ANTXR1, NUP98, COL1A2, WDR91, ND4	4052, 81622, 9938, 8516, 79567, 2152, 5341, 8611, 182, 93663, 6786, 9950, 5825, 1289, 4070, 6891, 23275, 1545, 3683, 2697, 25782, 26993, 6423, 653145, 7145, 25953, 6892, 2633, 7412, 10531, 115908, 6272, 2335, 9871, 6383, 4600, 1281, 6696, 4939, 29099, 51465, 3482, 3678, 55825, 754, 84168, 4928, 1278, 29062, 4538
vesicle fusion with endoplasmic reticulum-Golgi intermediate compartment (ERGIC) membrane	GO:1990668	0.000376077	2	0.0304043	6	TAP2, TAPBP	6891, 6892
embryo development	GO:0009790	0.000433473	14	5.00151	987	ITGA8, COL11A1, COL2A1, COL5A1, POFUT2, TM4SF1, COL5A2, SFRP2, COL12A1, CTHRC1, FN1, SEC24D, ITGA5, ND4	8516, 1301, 1280, 1289, 23275, 4071, 1290, 6423, 1303, 115908, 2335, 9871, 3678, 4538
blood vessel development	GO:0001568	0.00047634	12	3.87655	765	LTBP1, F3, JAG1, STIM1, COL5A1, CYP1B1, SFRP2, FN1, COL3A1, ITGA5, ANTXR1, COL1A2	4052, 2152, 182, 6786, 1289, 1545, 6423, 2335, 1281, 3678, 84168, 1278
immune response	GO:0006955	0.000490038	23	11.128	2196	UNC93B1, IFI44, JAG1, TRIM25, HLA-DQB1, COL2A1, TAP2, MX1, ITGAL, STAT2, TAPBP, GBP1, VCAM1, HLA-DRA, MX2, COL3A1, IFI44L, HLA-DRB1, OAS2, COMMD9, IGF2R, NMI, COL1A2	81622, 10561, 182, 7706, 3119, 1280, 6891, 4599, 3683, 6773, 6892, 2633, 7412, 3122, 4600, 1281, 10964, 3123, 4939, 29099, 3482, 9111, 1278
wound healing	GO:0042060	0.000517448	10	2.82253	557	DGKA, F3, PLEK, COL5A1, ANXA8, FN1, COL3A1, MYOF, ITGA5, COL1A2	1606, 2152, 5341, 1289, 653145, 2335, 1281, 26509, 3678, 1278
tendon development	GO:0035989	0.00052476	2	0.0354717	7	COL11A1, COL5A1	1301, 1289
response to cytokine	GO:0034097	0.00054421	15	5.73628	1132	F3, TRIM25, HLA-DQB1, MX1, STAT2, GBP1, VCAM1, HLA-DRA, FN1, MX2, COL3A1, HLA-DRB1, OAS2, NMI, COL1A2	2152, 7706, 3119, 4599, 6773, 2633, 7412, 3122, 2335, 4600, 1281, 3123, 4939, 9111, 1278
ketone catabolic process	GO:0042182	0.000697357	2	0.0405391	8	PNKD, CBR3	25953, 874
vasculature development	GO:0001944	0.000699624	12	4.04884	799	LTBP1, F3, JAG1, STIM1, COL5A1, CYP1B1, SFRP2, FN1, COL3A1, ITGA5, ANTXR1, COL1A2	4052, 2152, 182, 6786, 1289, 1545, 6423, 2335, 1281, 3678, 84168, 1278
mitochondrial fission	GO:0000266	0.000733269	3	0.177358	35	MX1, STAT2, MX2	4599, 6773, 4600
ossification	GO:0001503	0.000740855	8	1.94588	384	COL11A1, JAG1, COL2A1, COL5A2, SFRP2, CTHRC1, SORT1, SPP1	1301, 182, 1280, 1290, 6423, 115908, 6272, 6696
cellular response to cytokine stimulus	GO:0071345	0.000769191	14	5.30049	1046	F3, TRIM25, HLA-DQB1, MX1, STAT2, GBP1, VCAM1, HLA-DRA, FN1, MX2, HLA-DRB1, OAS2, NMI, COL1A2	2152, 7706, 3119, 4599, 6773, 2633, 7412, 3122, 2335, 4600, 3123, 4939, 9111, 1278
cardiovascular system development	GO:0072358	0.000771643	12	4.09445	808	LTBP1, F3, JAG1, STIM1, COL5A1, CYP1B1, SFRP2, FN1, COL3A1, ITGA5, ANTXR1, COL1A2	4052, 2152, 182, 6786, 1289, 1545, 6423, 2335, 1281, 3678, 84168, 1278
cell-matrix adhesion	GO:0007160	0.000975326	6	1.13509	224	ITGA8, JAG1, ITGAL, VCAM1, FN1, COL3A1	8516, 182, 3683, 7412, 2335, 1281
membrane fission	GO:0090148	0.00111331	2	0.0506739	10	MX1, MX2	4599, 4600
cellular response to type I interferon	GO:0071357	0.00113265	4	0.456065	90	MX1, STAT2, MX2, OAS2	4599, 6773, 4600, 4939
type I interferon signaling pathway	GO:0060337	0.00113265	4	0.456065	90	MX1, STAT2, MX2, OAS2	4599, 6773, 4600, 4939
regulation of gastrulation	GO:0010470	0.0013427	3	0.217898	43	COL5A1, COL5A2, SFRP2	1289, 1290, 6423
response to type I interferon	GO:0034340	0.0013843	4	0.481402	95	MX1, STAT2, MX2, OAS2	4599, 6773, 4600, 4939
animal organ morphogenesis	GO:0009887	0.00139027	13	5.00151	987	ITGA8, COL11A1, JAG1, STIM1, COL2A1, COL5A1, TACSTD2, COL5A2, SFRP2, COL12A1, CTHRC1, COL3A1, COL1A2	8516, 1301, 182, 6786, 1280, 1289, 4070, 1290, 6423, 1303, 115908, 1281, 1278
inner ear morphogenesis	GO:0042472	0.00143894	4	0.486469	96	ITGA8, COL11A1, COL2A1, CTHRC1	8516, 1301, 1280, 115908
antigen processing and presentation of exogenous peptide antigen via MHC class II	GO:0019886	0.00155271	4	0.496604	98	HLA-DQB1, HLA-DRA, SEC24D, HLA-DRB1	3119, 3122, 9871, 3123
anatomical structure development	GO:0048856	0.00158611	44	29.852	5891	LTBP1, ITGA8, PLOD1, COL11A1, CDH6, IGFBP7, F3, PLEK, JAG1, ARHGAP18, STIM1, COL2A1, COL5A1, TACSTD2, POFUT2, CYP1B1, TM4SF1, GJA1, COL5A2, SFRP2, PSMG1, COL12A1, STAT2, HNMT, GBP1, VCAM1, CTHRC1, SORT1, FN1, SEC24D, SDC2, COL3A1, SPP1, OAS2, UBE2J1, IGF2R, GLDN, MYOF, ITGA5, ANTXR1, MGMT, DHRS2, COL1A2, ND4	4052, 8516, 5351, 1301, 1004, 3490, 2152, 5341, 182, 93663, 6786, 1280, 1289, 4070, 23275, 1545, 4071, 2697, 1290, 6423, 8624, 1303, 6773, 3176, 2633, 7412, 115908, 6272, 2335, 9871, 6383, 1281, 6696, 4939, 51465, 3482, 342035, 26509, 3678, 84168, 4255, 10202, 1278, 4538
heterophilic cell-cell adhesion via plasma membrane cell adhesion molecules	GO:0007157	0.00163355	3	0.2331	46	ITGAL, VCAM1, ITGA5	3683, 7412, 3678
antigen processing and presentation of peptide antigen via MHC class II	GO:0002495	0.00173488	4	0.511806	101	HLA-DQB1, HLA-DRA, SEC24D, HLA-DRB1	3119, 3122, 9871, 3123
chondrocyte development	GO:0002063	0.00173855	3	0.238167	47	COL11A1, SFRP2, COL12A1	1301, 6423, 1303
antigen processing and presentation of peptide antigen via MHC class I	GO:0002474	0.00173855	3	0.238167	47	TAP2, TAPBP, SEC24D	6891, 6892, 9871
response to chemical	GO:0042221	0.00176667	37	23.7306	4683	LTBP1, ITGA8, IGFBP7, F3, PLPP1, JAG1, TRIM25, STIM1, HLA-DQB1, ABCD3, COL2A1, CYP1B1, MX1, COL5A2, SFRP2, STAT2, GBP1, VCAM1, HLA-DRA, SORT1, FN1, MX2, COL3A1, HLA-DRB1, SPP1, OAS2, UBE2J1, IGF2R, MYOF, ITGA5, PPOX, MGMT, DHRS2, NMI, CBR3, COL1A2, ND4	4052, 8516, 3490, 2152, 8611, 182, 7706, 6786, 3119, 5825, 1280, 1545, 4599, 1290, 6423, 6773, 2633, 7412, 3122, 6272, 2335, 4600, 1281, 3123, 6696, 4939, 51465, 3482, 26509, 3678, 5498, 4255, 10202, 9111, 874, 1278, 4538
antigen processing and presentation of peptide or polysaccharide antigen via MHC class II	GO:0002504	0.00179877	4	0.516873	102	HLA-DQB1, HLA-DRA, SEC24D, HLA-DRB1	3119, 3122, 9871, 3123
cell migration	GO:0016477	0.00185699	17	7.84938	1549	RIPOR1, F3, PLPP1, JAG1, COL5A1, TACSTD2, CYP1B1, ITGAL, SFRP2, TNS1, VCAM1, CTHRC1, FN1, SDC2, COL3A1, ITGA5, COL1A2	79567, 2152, 8611, 182, 1289, 4070, 1545, 3683, 6423, 7145, 7412, 115908, 2335, 6383, 1281, 3678, 1278
negative regulation of substrate adhesion-dependent cell spreading	GO:1900025	0.00191094	2	0.065876	13	TACSTD2, GBP1	4070, 2633
cell motility	GO:0048870	0.0020298	18	8.62469	1702	RIPOR1, F3, PLPP1, JAG1, ARHGAP18, COL5A1, TACSTD2, CYP1B1, ITGAL, SFRP2, TNS1, VCAM1, CTHRC1, FN1, SDC2, COL3A1, ITGA5, COL1A2	79567, 2152, 8611, 182, 93663, 1289, 4070, 1545, 3683, 6423, 7145, 7412, 115908, 2335, 6383, 1281, 3678, 1278
localization of cell	GO:0051674	0.0020298	18	8.62469	1702	RIPOR1, F3, PLPP1, JAG1, ARHGAP18, COL5A1, TACSTD2, CYP1B1, ITGAL, SFRP2, TNS1, VCAM1, CTHRC1, FN1, SDC2, COL3A1, ITGA5, COL1A2	79567, 2152, 8611, 182, 93663, 1289, 4070, 1545, 3683, 6423, 7145, 7412, 115908, 2335, 6383, 1281, 3678, 1278
terpenoid metabolic process	GO:0006721	0.00221672	4	0.547278	108	CYP1B1, SDC2, FDFT1, PECR	1545, 6383, 2222, 55825
antigen processing and presentation of endogenous peptide antigen via MHC class I	GO:0019885	0.00222208	2	0.0709434	14	TAP2, TAPBP	6891, 6892
antigen processing and presentation of endogenous peptide antigen	GO:0002483	0.00222208	2	0.0709434	14	TAP2, TAPBP	6891, 6892
innate immune response	GO:0045087	0.00234499	12	4.66706	921	UNC93B1, TRIM25, HLA-DQB1, MX1, STAT2, GBP1, VCAM1, HLA-DRA, MX2, HLA-DRB1, OAS2, NMI	81622, 7706, 3119, 4599, 6773, 2633, 7412, 3122, 4600, 3123, 4939, 9111
inner ear development	GO:0048839	0.00250648	5	0.937466	185	ITGA8, COL11A1, JAG1, COL2A1, CTHRC1	8516, 1301, 182, 1280, 115908
heart development	GO:0007507	0.00251652	9	2.90868	574	LTBP1, COL11A1, JAG1, COL2A1, COL5A1, GJA1, SFRP2, VCAM1, COL3A1	4052, 1301, 182, 1280, 1289, 2697, 6423, 7412, 1281
establishment of planar polarity involved in neural tube closure	GO:0090177	0.0025555	2	0.0760108	15	SFRP2, CTHRC1	6423, 115908
aorta development	GO:0035904	0.00273213	3	0.278706	55	LTBP1, JAG1, COL3A1	4052, 182, 1281
cellular response to growth factor stimulus	GO:0071363	0.00286005	10	3.54717	700	LTBP1, ITGA8, COL2A1, SFRP2, VCAM1, SORT1, COL3A1, MYOF, ITGA5, COL1A2	4052, 8516, 1280, 6423, 7412, 6272, 1281, 26509, 3678, 1278
ear morphogenesis	GO:0042471	0.00287218	4	0.587817	116	ITGA8, COL11A1, COL2A1, CTHRC1	8516, 1301, 1280, 115908
morphogenesis of an epithelial sheet	GO:0002011	0.00287627	3	0.283774	56	JAG1, COL5A1, ITGA5	182, 1289, 3678
multicellular organismal process	GO:0032501	0.00321074	52	38.426	7583	LTBP1, ITGA8, LMCD1, DGKA, COL11A1, IGFBP7, F3, PLEK, PLPP1, JAG1, TRIM25, STIM1, COL2A1, COL5A1, TACSTD2, POFUT2, CYP1B1, TM4SF1, GJA1, COL5A2, SFRP2, ANXA8, PSMG1, PNKD, COL12A1, PZP, HNMT, GBP1, VCAM1, HLA-DRA, CTHRC1, SORT1, FN1, SEC24D, SDC2, COL3A1, SPP1, OAS2, UBE2J1, NDUFA12, IGF2R, GLDN, MYOF, DTNA, ITGA5, ANTXR1, MGMT, DHRS2, NMI, CBR3, COL1A2, ND4	4052, 8516, 29995, 1606, 1301, 3490, 2152, 5341, 8611, 182, 7706, 6786, 1280, 1289, 4070, 23275, 1545, 4071, 2697, 1290, 6423, 653145, 8624, 25953, 1303, 5858, 3176, 2633, 7412, 3122, 115908, 6272, 2335, 9871, 6383, 1281, 6696, 4939, 51465, 55967, 3482, 342035, 26509, 1837, 3678, 84168, 4255, 10202, 9111, 874, 1278, 4538
chondrocyte differentiation	GO:0002062	0.00324494	4	0.608086	120	COL11A1, COL2A1, SFRP2, COL12A1	1301, 1280, 6423, 1303
negative regulation of lipase activity	GO:0060192	0.00328823	2	0.0861456	17	ANXA8, SORT1	653145, 6272
establishment of planar polarity of embryonic epithelium	GO:0042249	0.00328823	2	0.0861456	17	SFRP2, CTHRC1	6423, 115908
wound healing, spreading of epidermal cells	GO:0035313	0.00328823	2	0.0861456	17	COL5A1, ITGA5	1289, 3678
locomotion	GO:0040011	0.00329244	19	9.75472	1925	RIPOR1, F3, PLPP1, JAG1, ARHGAP18, TRIM25, COL5A1, TACSTD2, CYP1B1, ITGAL, SFRP2, TNS1, VCAM1, CTHRC1, FN1, SDC2, COL3A1, ITGA5, COL1A2	79567, 2152, 8611, 182, 93663, 7706, 1289, 4070, 1545, 3683, 6423, 7145, 7412, 115908, 2335, 6383, 1281, 3678, 1278
positive regulation of angiogenesis	GO:0045766	0.00357811	5	1.01854	201	F3, STIM1, CYP1B1, SFRP2, ITGA5	2152, 6786, 1545, 6423, 3678
positive regulation of osteoblast differentiation	GO:0045669	0.00366695	3	0.309111	61	JAG1, SFRP2, CTHRC1	182, 6423, 115908
cardiac ventricle development	GO:0003231	0.00386394	4	0.638491	126	LTBP1, COL11A1, JAG1, SFRP2	4052, 1301, 182, 6423
response to growth factor	GO:0070848	0.00389063	10	3.70426	731	LTBP1, ITGA8, COL2A1, SFRP2, VCAM1, SORT1, COL3A1, MYOF, ITGA5, COL1A2	4052, 8516, 1280, 6423, 7412, 6272, 1281, 26509, 3678, 1278
isoprenoid metabolic process	GO:0006720	0.00397435	4	0.643558	127	CYP1B1, SDC2, FDFT1, PECR	1545, 6383, 2222, 55825
oxidation-reduction process	GO:0055114	0.00404508	12	4.99137	985	PLOD1, PTGR2, ABCD3, HIBCH, CYP1B1, VCAM1, NDUFA12, PECR, PPOX, DHRS2, CBR3, ND4	5351, 145482, 5825, 26275, 1545, 7412, 55967, 55825, 5498, 10202, 874, 4538
membrane organization	GO:0061024	0.00418858	11	4.36809	862	ARHGAP25, COL5A1, TAP2, MX1, AKAP8L, TAPBP, SEC24D, MX2, IGF2R, GLDN, MYOF	9938, 1289, 6891, 4599, 26993, 6892, 9871, 4600, 3482, 342035, 26509
regulation of cell-substrate adhesion	GO:0010810	0.00430822	5	1.06415	210	JAG1, TACSTD2, GBP1, FN1, ITGA5	182, 4070, 2633, 2335, 3678
defense response	GO:0006952	0.00445097	17	8.53854	1685	UNC93B1, F3, TRIM25, HLA-DQB1, MX1, ITGAL, STAT2, GBP1, VCAM1, HLA-DRA, FN1, MX2, IFI44L, HLA-DRB1, SPP1, OAS2, NMI	81622, 2152, 7706, 3119, 4599, 3683, 6773, 2633, 7412, 3122, 2335, 4600, 10964, 3123, 6696, 4939, 9111
ear development	GO:0043583	0.00448389	5	1.07429	212	ITGA8, COL11A1, JAG1, COL2A1, CTHRC1	8516, 1301, 182, 1280, 115908
tissue development	GO:0009888	0.00449276	19	10.0334	1980	ITGA8, PLOD1, COL11A1, JAG1, STIM1, COL2A1, COL5A1, TACSTD2, POFUT2, CYP1B1, COL5A2, SFRP2, COL12A1, CTHRC1, FN1, COL3A1, SPP1, ITGA5, MGMT	8516, 5351, 1301, 182, 6786, 1280, 1289, 4070, 23275, 1545, 1290, 6423, 1303, 115908, 2335, 1281, 6696, 3678, 4255
notochord development	GO:0030903	0.00454869	2	0.101348	20	COL2A1, COL5A2	1280, 1290
cartilage condensation	GO:0001502	0.00454869	2	0.101348	20	COL11A1, COL2A1	1301, 1280
negative regulation of cell-substrate adhesion	GO:0010812	0.00457829	3	0.334447	66	JAG1, TACSTD2, GBP1	182, 4070, 2633
cellular response to amino acid stimulus	GO:0071230	0.00477549	3	0.339515	67	COL5A2, COL3A1, COL1A2	1290, 1281, 1278
cell adhesion mediated by integrin	GO:0033627	0.00477549	3	0.339515	67	CYP1B1, SFRP2, ITGA5	1545, 6423, 3678
response to nutrient	GO:0007584	0.00485049	5	1.09456	216	TRIM25, SFRP2, VCAM1, SPP1, MGMT	7706, 6423, 7412, 6696, 4255
cell aggregation	GO:0098743	0.00501098	2	0.106415	21	COL11A1, COL2A1	1301, 1280
antigen processing and presentation of endogenous antigen	GO:0019883	0.00501098	2	0.106415	21	TAP2, TAPBP	6891, 6892
smooth muscle tissue development	GO:0048745	0.00501098	2	0.106415	21	ITGA8, COL3A1	8516, 1281
lipid metabolic process	GO:0006629	0.00529834	15	7.23623	1428	DGKA, PTGR2, IGFBP7, PLEK, PLPP1, ABCD3, HIBCH, CYP1B1, SDC2, SPP1, FDFT1, PECR, PLD3, DHRS2, WDR91	1606, 145482, 3490, 5341, 8611, 5825, 26275, 1545, 6383, 6696, 2222, 55825, 23646, 10202, 29062
integrin activation	GO:0033622	0.00549397	2	0.111482	22	PLEK, FN1	5341, 2335
sensory organ development	GO:0007423	0.00577875	8	2.71105	535	ITGA8, COL11A1, JAG1, COL2A1, COL5A1, CYP1B1, COL5A2, CTHRC1	8516, 1301, 182, 1280, 1289, 1545, 1290, 115908
lipid catabolic process	GO:0016042	0.00592336	6	1.6317	322	ABCD3, HIBCH, CYP1B1, SPP1, PECR, PLD3	5825, 26275, 1545, 6696, 55825, 23646
cardiac ventricle morphogenesis	GO:0003208	0.00606634	3	0.369919	73	COL11A1, JAG1, SFRP2	1301, 182, 6423
positive regulation of vasculature development	GO:1904018	0.00618906	5	1.16043	229	F3, STIM1, CYP1B1, SFRP2, ITGA5	2152, 6786, 1545, 6423, 3678
mesoderm formation	GO:0001707	0.00629974	3	0.374987	74	ITGA8, POFUT2, SFRP2	8516, 23275, 6423
animal organ development	GO:0048513	0.00635451	28	17.6244	3478	LTBP1, ITGA8, COL11A1, PLEK, JAG1, STIM1, COL2A1, COL5A1, TACSTD2, POFUT2, CYP1B1, GJA1, COL5A2, SFRP2, PSMG1, COL12A1, HNMT, VCAM1, CTHRC1, FN1, COL3A1, SPP1, OAS2, IGF2R, MGMT, DHRS2, COL1A2, ND4	4052, 8516, 1301, 5341, 182, 6786, 1280, 1289, 4070, 23275, 1545, 2697, 1290, 6423, 8624, 1303, 3176, 7412, 115908, 2335, 1281, 6696, 4939, 3482, 4255, 10202, 1278, 4538
response to heat	GO:0009408	0.00649542	4	0.739838	146	IGFBP7, DNAJA4, BAG2, MYOF	3490, 55466, 9532, 26509
developmental process	GO:0032502	0.00650018	44	31.9093	6297	LTBP1, ITGA8, PLOD1, COL11A1, CDH6, IGFBP7, F3, PLEK, JAG1, ARHGAP18, STIM1, COL2A1, COL5A1, TACSTD2, POFUT2, CYP1B1, TM4SF1, GJA1, COL5A2, SFRP2, PSMG1, COL12A1, STAT2, HNMT, GBP1, VCAM1, CTHRC1, SORT1, FN1, SEC24D, SDC2, COL3A1, SPP1, OAS2, UBE2J1, IGF2R, GLDN, MYOF, ITGA5, ANTXR1, MGMT, DHRS2, COL1A2, ND4	4052, 8516, 5351, 1301, 1004, 3490, 2152, 5341, 182, 93663, 6786, 1280, 1289, 4070, 23275, 1545, 4071, 2697, 1290, 6423, 8624, 1303, 6773, 3176, 2633, 7412, 115908, 6272, 2335, 9871, 6383, 1281, 6696, 4939, 51465, 3482, 342035, 26509, 3678, 84168, 4255, 10202, 1278, 4538
multi-organism process	GO:0051704	0.00651532	22	12.7343	2513	UNC93B1, IFI44, IGFBP7, PLPP1, TRIM25, TAP2, MX1, STAT2, PZP, GBP1, VCAM1, HLA-DRA, FN1, MX2, IFI44L, SPP1, OAS2, UBE2J1, COPS7B, IGF2R, ITGA5, NUP98	81622, 10561, 3490, 8611, 7706, 6891, 4599, 6773, 5858, 2633, 7412, 3122, 2335, 4600, 10964, 6696, 4939, 51465, 64708, 3482, 3678, 4928
mesoderm morphogenesis	GO:0048332	0.00678247	3	0.385121	76	ITGA8, POFUT2, SFRP2	8516, 23275, 6423
regulation of peptidase activity	GO:0052547	0.00702168	7	2.22965	440	F3, SFRP2, ANXA8, PZP, FN1, ANTXR1, MGMT	2152, 6423, 653145, 5858, 2335, 84168, 4255
positive regulation of blood coagulation	GO:0030194	0.00706498	2	0.126685	25	F3, PLEK	2152, 5341
positive regulation of hemostasis	GO:1900048	0.00706498	2	0.126685	25	F3, PLEK	2152, 5341
response to acid chemical	GO:0001101	0.00714269	6	1.69757	335	IGFBP7, COL5A2, COL3A1, IGF2R, MGMT, COL1A2	3490, 1290, 1281, 3482, 4255, 1278
blood coagulation	GO:0007596	0.00724347	6	1.70264	336	DGKA, F3, PLEK, ANXA8, COL3A1, COL1A2	1606, 2152, 5341, 653145, 1281, 1278
cell junction assembly	GO:0034329	0.00725583	5	1.20604	238	CDH6, GJA1, TNS1, FN1, ITGA5	1004, 2697, 7145, 2335, 3678
membrane fusion	GO:0061025	0.00730235	4	0.765175	151	TAP2, MX1, TAPBP, MX2	6891, 4599, 6892, 4600
T cell receptor signaling pathway	GO:0050852	0.00747115	4	0.770243	152	HLA-DQB1, GBP1, HLA-DRA, HLA-DRB1	3119, 2633, 3122, 3123
cellular response to stimulus	GO:0051716	0.00754656	50	37.8686	7473	LTBP1, UNC93B1, ARHGAP25, ITGA8, LMCD1, DGKA, CDH6, RIPOR1, IGFBP7, F3, PLEK, PLPP1, JAG1, ARHGAP18, TRIM25, HLA-DQB1, COL2A1, TACSTD2, CYP1B1, MX1, ITGAL, GJA1, COL5A2, SFRP2, STAT2, GBP1, VCAM1, HLA-DRA, CTHRC1, SORT1, FN1, SDC2, BAG2, MX2, COL3A1, HLA-DRB1, SPP1, OAS2, UBE2J1, COPS7B, IGF2R, MYOF, DTNA, ITGA5, PTTG1IP, MGMT, DHRS2, NMI, CBR3, COL1A2	4052, 81622, 9938, 8516, 29995, 1606, 1004, 79567, 3490, 2152, 5341, 8611, 182, 93663, 7706, 3119, 1280, 4070, 1545, 4599, 3683, 2697, 1290, 6423, 6773, 2633, 7412, 3122, 115908, 6272, 2335, 6383, 9532, 4600, 1281, 3123, 6696, 4939, 51465, 64708, 3482, 26509, 1837, 3678, 754, 4255, 10202, 9111, 874, 1278
antigen processing and presentation of exogenous peptide antigen via MHC class I, TAP-dependent	GO:0002479	0.00762862	2	0.131752	26	TAP2, TAPBP	6891, 6892
positive regulation of coagulation	GO:0050820	0.00762862	2	0.131752	26	F3, PLEK	2152, 5341
defense response to other organism	GO:0098542	0.00769117	8	2.84787	562	UNC93B1, TRIM25, MX1, STAT2, GBP1, MX2, IFI44L, OAS2	81622, 7706, 4599, 6773, 2633, 4600, 10964, 4939
hemostasis	GO:0007599	0.00776292	6	1.72798	341	DGKA, F3, PLEK, ANXA8, COL3A1, COL1A2	1606, 2152, 5341, 653145, 1281, 1278
platelet activation	GO:0030168	0.00781643	4	0.780377	154	DGKA, PLEK, COL3A1, COL1A2	1606, 5341, 1281, 1278
coagulation	GO:0050817	0.00786996	6	1.73305	342	DGKA, F3, PLEK, ANXA8, COL3A1, COL1A2	1606, 2152, 5341, 653145, 1281, 1278
protein kinase C-activating G protein-coupled receptor signaling pathway	GO:0007205	0.00881457	2	0.141887	28	DGKA, PLPP1	1606, 8611
cell-cell adhesion	GO:0098609	0.00890284	10	4.18059	825	ITGA8, CDH6, PLEK, JAG1, TACSTD2, CYP1B1, ITGAL, VCAM1, GLDN, ITGA5	8516, 1004, 5341, 182, 4070, 1545, 3683, 7412, 342035, 3678
positive regulation of ossification	GO:0045778	0.00922316	3	0.430728	85	JAG1, SFRP2, CTHRC1	182, 6423, 115908
regulation of response to stimulus	GO:0048583	0.00946792	32	21.6023	4263	LTBP1, UNC93B1, ARHGAP25, ITGA8, LMCD1, F3, PLEK, JAG1, ARHGAP18, TRIM25, HLA-DQB1, COL2A1, CYP1B1, ITGAL, GJA1, SFRP2, GBP1, VCAM1, HLA-DRA, CTHRC1, FN1, BAG2, COL3A1, HLA-DRB1, SPP1, UBE2J1, MYOF, ITGA5, PTTG1IP, MGMT, NMI, COL1A2	4052, 81622, 9938, 8516, 29995, 2152, 5341, 182, 93663, 7706, 3119, 1280, 1545, 3683, 2697, 6423, 2633, 7412, 3122, 115908, 2335, 9532, 1281, 3123, 6696, 51465, 26509, 3678, 754, 4255, 9111, 1278
signal transduction	GO:0007165	0.00950709	42	30.6577	6050	LTBP1, UNC93B1, ARHGAP25, ITGA8, LMCD1, DGKA, CDH6, RIPOR1, F3, PLEK, PLPP1, JAG1, ARHGAP18, TRIM25, HLA-DQB1, COL2A1, TACSTD2, CYP1B1, MX1, ITGAL, GJA1, SFRP2, STAT2, GBP1, VCAM1, HLA-DRA, CTHRC1, SORT1, FN1, SDC2, MX2, COL3A1, HLA-DRB1, SPP1, OAS2, IGF2R, MYOF, DTNA, ITGA5, PTTG1IP, NMI, COL1A2	4052, 81622, 9938, 8516, 29995, 1606, 1004, 79567, 2152, 5341, 8611, 182, 93663, 7706, 3119, 1280, 4070, 1545, 4599, 3683, 2697, 6423, 6773, 2633, 7412, 3122, 115908, 6272, 2335, 6383, 4600, 1281, 3123, 6696, 4939, 3482, 26509, 1837, 3678, 754, 9111, 1278
heart morphogenesis	GO:0003007	0.00991805	5	1.30232	257	COL11A1, JAG1, COL2A1, COL5A1, SFRP2	1301, 182, 1280, 1289, 6423
