# Supplementary material for: High glucose treatment promotes extracellular matrix proteome remodeling in Mller glial cells
Source: PeerJ. 2021 May 18;9:e11316. doi: 10.7717/peerj.11316 (PMC8139267; doi:10.7717/peerj.11316)
Supplement: Supplemental Information 4 — In the glycolysis inhibition treatment group, altogether 800 proteins exhibited significant changes in abundance levels compared to the normoglycemic control group. Thereof 240 proteins met the additional criterion of fold change cut-off. [file peerj-09-11316-s004.xlsx]

## Sheet: glycolysis inhibition
PG.ProteinAccessions	number of peptides used for quantification	ratio 2DG/ lowgluc	T-TEST 2DG/ lowgluc	Gene symbol	Category as listed in human matrisome	PG.ProteinDescriptions	mean lowgluc	[1] SAS11508X003__con1_92-68117.raw.PG.Quantity	[2] SAS11508X023__con2_92-68137.raw.PG.Quantity	[3] SAS11508X025__con3_92-68139.raw.PG.Quantity	[4] SAS11508X017__con4_92-68131.raw.PG.Quantity	mean 2DG	[19] SAS11508X019__2DG1_92-68133.raw.PG.Quantity	[20] SAS11508X004__2DG2_92-68118.raw.PG.Quantity	[21] SAS11508X018__2DG3_92-68132.raw.PG.Quantity	[22] SAS11508X002__2DG4_92-68116.raw.PG.Quantity	[23] SAS11508X014__2DG5_92-68128.raw.PG.Quantity	[24] SAS11508X021__2DG6_92-68135.raw.PG.Quantity	[1] SAS11508X003__con1_92-68117.raw.PG.Quantity	[2] SAS11508X023__con2_92-68137.raw.PG.Quantity	[3] SAS11508X025__con3_92-68139.raw.PG.Quantity	[4] SAS11508X017__con4_92-68131.raw.PG.Quantity	[19] SAS11508X019__2DG1_92-68133.raw.PG.Quantity	[20] SAS11508X004__2DG2_92-68118.raw.PG.Quantity	[21] SAS11508X018__2DG3_92-68132.raw.PG.Quantity	[22] SAS11508X002__2DG4_92-68116.raw.PG.Quantity	[23] SAS11508X014__2DG5_92-68128.raw.PG.Quantity	[24] SAS11508X021__2DG6_92-68135.raw.PG.Quantity	[1] SAS11508X003__con1_92-68117.raw.PG.NrOfStrippedSequencesIdentified	[2] SAS11508X023__con2_92-68137.raw.PG.NrOfStrippedSequencesIdentified	[3] SAS11508X025__con3_92-68139.raw.PG.NrOfStrippedSequencesIdentified	[4] SAS11508X017__con4_92-68131.raw.PG.NrOfStrippedSequencesIdentified	[5] SAS11508X027__con5_92-68141.raw.PG.NrOfStrippedSequencesIdentified	[6] SAS11508X024__con6_92-68138.raw.PG.NrOfStrippedSequencesIdentified	[19] SAS11508X019__2DG1_92-68133.raw.PG.NrOfStrippedSequencesIdentified	[20] SAS11508X004__2DG2_92-68118.raw.PG.NrOfStrippedSequencesIdentified	[21] SAS11508X018__2DG3_92-68132.raw.PG.NrOfStrippedSequencesIdentified	[22] SAS11508X002__2DG4_92-68116.raw.PG.NrOfStrippedSequencesIdentified	[23] SAS11508X014__2DG5_92-68128.raw.PG.NrOfStrippedSequencesIdentified	[24] SAS11508X021__2DG6_92-68135.raw.PG.NrOfStrippedSequencesIdentified	[1] SAS11508X003__con1_92-68117.raw.PG.NrOfStrippedSequencesUsedForQuantification	[2] SAS11508X023__con2_92-68137.raw.PG.NrOfStrippedSequencesUsedForQuantification	[3] SAS11508X025__con3_92-68139.raw.PG.NrOfStrippedSequencesUsedForQuantification	[4] SAS11508X017__con4_92-68131.raw.PG.NrOfStrippedSequencesUsedForQuantification	[5] SAS11508X027__con5_92-68141.raw.PG.NrOfStrippedSequencesUsedForQuantification	[6] SAS11508X024__con6_92-68138.raw.PG.NrOfStrippedSequencesUsedForQuantification	[19] SAS11508X019__2DG1_92-68133.raw.PG.NrOfStrippedSequencesUsedForQuantification	[20] SAS11508X004__2DG2_92-68118.raw.PG.NrOfStrippedSequencesUsedForQuantification	[21] SAS11508X018__2DG3_92-68132.raw.PG.NrOfStrippedSequencesUsedForQuantification
>ENSSSCP00000001916	2	0.120419	0.00249379	DNAJA4	none	Sus scrofa DnaJ (Hsp40) homolog, subfamily A, member 4 (DNAJA4), mRNA. [Source:RefSeq mRNA;Acc:NM_214339]|7|ENSSSCG00000001759|ENSSSCT00000001965	32963.4	62374.6	23605.1	22120.7	23753.4	3969.43	3725.04	2997.56	3719.27	5001.91	4220.79	4152.02	15.9287	14.5268	14.4331	14.5358	11.863	11.5496	11.8608	12.2883	12.0433	12.0196	0	0	0	0	1	0	0	1	0	2	2	1	2	2	2	2	2	2	2	2	2
>ENSSSCP00000009507	6	0.149659	0.000102554	IGFBP7	ECM Glycoproteins	insulin-like growth factor binding protein 7 [Source:HGNC Symbol;Acc:5476]|8|ENSSSCG00000008913|ENSSSCT00000009759	133142	133965	123346	126141	149116	19925.9	9094.12	23805.5	13955.9	16133	36678	19888.5	17.0315	16.9124	16.9447	17.1861	13.1507	14.539	13.7686	13.9777	15.1626	14.2796	6	7	8	7	4	4	0	0	0	0	0	1	6	6	6	6	6	6	6	6	6
>ENSSSCP00000017132	68	0.195001	3.83069e-08	FN1	ECM Glycoproteins	fibronectin 1 [Source:HGNC Symbol;Acc:3778]|15|ENSSSCG00000016174|ENSSSCT00000017610	6.35549e+06	6.25765e+06	6.4824e+06	6849416	5832484	1.23933e+06	1.56414e+06	1.35288e+06	1142519	1.01216e+06	1.15005e+06	1.21423e+06	22.5772	22.6281	22.7075	22.4757	20.5769	20.3676	20.1238	19.949	20.1333	20.2116	68	83	79	74	61	55	13	12	16	15	21	17	68	68	68	68	68	68	68	68	68
>ENSSSCP00000006461	4	0.220084	2.25302e-06	CTHRC1	ECM Glycoproteins	Uncharacterized protein [Source:UniProtKB/TrEMBL;Acc:F1S1D2]|4|ENSSSCG00000006051|ENSSSCT00000006640	102696	104694	83112.5	111057	111923	22601.9	20998.2	28830.5	20973.2	21941.2	21340.9	21527.3	16.6758	16.3428	16.7609	16.7721	14.358	14.8153	14.3563	14.4214	14.3813	14.3939	6	7	7	8	4	4	0	1	2	1	0	0	4	4	4	4	4	4	4	4	4
>ENSSSCP00000004838	40	0.275039	4.05462e-08	COL12A1	Collagens	Uncharacterized protein [Source:UniProtKB/TrEMBL;Acc:F1RQI0]|1|ENSSSCG00000004484|ENSSSCT00000004955	21177839	22875754	20823392	19782740	21229470	5.82474e+06	5.4831e+06	7.31838e+06	5452351	5349497	5290564	6054552	24.4473	24.3117	24.2377	24.3396	22.3866	22.8031	22.3784	22.351	22.335	22.5296	40	40	40	40	38	39	35	39	36	37	37	39	40	40	40	40	40	40	40	40	40
>ENSSSCP00000001570	2	0.30425	0.000306398	HLA-DRB1	none	Sus scrofa MHC class II histocompatibility antigen SLA-DRB1 (SLA-DRB1), mRNA. [Source:RefSeq mRNA;Acc:NM_001113695]|7|ENSSSCG00000001455|ENSSSCT00000001612	37886.2	37000.1	33315.8	40696.7	40532.1	11526.9	11050.8	9868.81	14843.7	15213	12793.7	5391.18	15.1752	15.0239	15.3126	15.3068	13.4319	13.2687	13.8576	13.893	13.6431	12.3964	5	4	5	5	3	5	1	2	3	3	3	3	2	2	2	2	2	2	2	2	2
>ENSSSCP00000006161	26	0.308708	2.35009e-08	COL5A1	Collagens	collagen, type V, alpha 1 [Source:HGNC Symbol;Acc:2209]|1|ENSSSCG00000005751|ENSSSCT00000006323	2.16816e+06	2.09521e+06	2.39865e+06	2.04541e+06	2.13339e+06	669330	566704	719078	665496	671629	652794	740279	20.9987	21.1938	20.964	21.0247	19.1122	19.4558	19.3441	19.3573	19.3163	19.4977	40	43	45	41	33	35	25	23	26	26	28	26	26	26	26	26	26	26	26	26	26
>ENSSSCP00000018631	3	0.330489	2.0458e-06	COL3A1	Collagens	Uncharacterized protein [Source:UniProtKB/TrEMBL;Acc:F1RT61]|GL896296.2|ENSSSCG00000017579|ENSSSCT00000019137	638072	562386	730728	597494	661680	210876	237510	246971	181797	207944	188767	202265	19.1012	19.479	19.1886	19.3358	17.8576	17.914	17.472	17.6658	17.5262	17.6259	7	7	6	9	5	5	4	5	5	5	5	5	3	3	3	3	3	3	3	3	3
>ENSSSCP00000016253	20	0.351065	4.98826e-08	COL1A2	Collagens	Sus scrofa collagen, type I, alpha 2 (COL1A2), mRNA. [Source:RefSeq mRNA;Acc:NM_001243655]|9|ENSSSCG00000015326|ENSSSCT00000016699	2.84369e+06	2907149	2.62468e+06	2.75714e+06	3.08579e+06	998321	923774	1.11538e+06	962237	947025	919185	1.12233e+06	21.4712	21.3237	21.3947	21.5572	19.8172	20.0891	19.876	19.853	19.81	20.0981	53	56	53	58	46	48	35	40	36	39	39	39	20	20	20	20	20	20	20	20	20
>ENSSSCP00000011782	3	0.36081	2.21195e-05	ITGA8	none	integrin, alpha 8 [Source:HGNC Symbol;Acc:6144]|10|ENSSSCG00000011046|ENSSSCT00000012090	92671	108318	85446.3	77078.4	99841.2	33436.6	31612.8	33469.3	25941.3	31341.5	29524	48730.8	16.7249	16.3827	16.234	16.6073	14.9482	15.0306	14.663	14.9358	14.8496	15.5725	2	4	4	3	5	1	2	1	1	1	1	1	3	3	3	3	3	3	3	3	3
>ENSSSCP00000007316	10	0.371728	0.000345254	VCAM1	none	vascular cell adhesion molecule 1 [Source:HGNC Symbol;Acc:12663]|4|ENSSSCG00000006862|ENSSSCT00000007515	336247	320619	295685	363868	364817	124993	101868	209230	147340	108101	103647	79769.9	18.2905	18.1737	18.4731	18.4768	16.6363	17.6747	17.1688	16.722	16.6613	16.2836	9	14	13	14	9	11	4	7	8	7	6	4	10	10	10	10	10	10	10	10	10
>ENSSSCP00000006499	5	0.388006	3.78474e-07	SDC2	ECM-affiliated Proteins	syndecan 2 [Source:HGNC Symbol;Acc:10659]|4|ENSSSCG00000006088|ENSSSCT00000006679	163393	162230	168651	145794	176897	63397.4	66236.6	59332.5	55928.4	61493.6	61179.2	76214.1	17.3077	17.3637	17.1536	17.4326	16.0153	15.8565	15.7713	15.9081	15.9008	16.2178	4	5	4	5	4	5	4	4	4	4	4	4	5	5	5	5	5	5	5	5	5
>ENSSSCP00000007530	2	0.393586	0.000662951	JAG1	none	Delta-like protein [Source:UniProtKB/TrEMBL;Acc:F1SBK1]|17|ENSSSCG00000007067|ENSSSCT00000007738	17370.2	18835.5	14578.3	16500.1	19566.9	6836.67	5029.76	8467.69	8757.32	9585.92	3889.74	5289.57	14.2012	13.8315	14.0102	14.2561	12.2963	13.0478	13.0963	13.2267	11.9255	12.3689	4	6	4	3	1	1	0	0	0	1	0	1	2	2	2	2	2	2	2	2	2
>ENSSSCP00000004992	7	0.43232	8.74643e-06	GLDN	ECM Glycoproteins	gliomedin [Source:HGNC Symbol;Acc:29514]|1|ENSSSCG00000004632|ENSSSCT00000005116	335049	363741	370519	308197	297741	144848	140766	119979	178008	152289	129434	148615	18.4726	18.4992	18.2335	18.1837	17.1029	16.8724	17.4416	17.2165	16.9819	17.1812	6	7	6	7	4	7	4	4	5	4	6	4	7	7	7	7	7	7	7	7	7
>ENSSSCP00000009825	11	0.440453	0.000130958	SPP1	ECM Glycoproteins	Sus scrofa secreted phosphoprotein 1 (SPP1), mRNA. [Source:RefSeq mRNA;Acc:NM_214023]|8|ENSSSCG00000009216|ENSSSCT00000010091	207341	203684	220988	240156	164534	91323.7	106734	79949.1	69911.5	96264.4	118496	76587.6	17.636	17.7536	17.8736	17.328	16.7037	16.2868	16.0932	16.5547	16.8545	16.2248	9	10	10	10	5	4	0	2	3	6	5	0	11	11	11	11	11	11	11	11	11
>ENSSSCP00000022354	5	0.443044	7.49018e-06	F3	none	coagulation factor III (thromboplastin, tissue factor) [Source:HGNC Symbol;Acc:3541]|4|ENSSSCG00000022447|ENSSSCT00000027504	662479	667015	684391	640385	658126	293508	354280	289041	307579	272070	295632	242444	19.3474	19.3845	19.2886	19.328	18.4345	18.1409	18.2306	18.0536	18.1734	17.8873	5	5	5	5	5	5	3	4	4	4	4	5	5	5	5	5	5	5	5	5	5
>ENSSSCP00000009075	2	0.452513	0.00940224	LTBP1	ECM Glycoproteins	latent transforming growth factor beta binding protein 1 [Source:HGNC Symbol;Acc:6714]|3|ENSSSCG00000008510|ENSSSCT00000009313	11423.4	11798.4	10038.5	11358.9	12497.9	5169.25	5122.22	9357.37	1873.36	3991.56	3843.36	6827.61	13.5263	13.2933	13.4715	13.6094	12.3226	13.1919	10.8714	11.9627	11.9082	12.7372	1	3	3	2	5	1	0	2	0	0	0	0	2	2	2	2	2	2	2	2	2
>ENSSSCP00000003763	9	0.459623	8.2809e-05	FBLIM1	none	filamin binding LIM protein 1 [Source:HGNC Symbol;Acc:24686]|6|ENSSSCG00000003465|ENSSSCT00000003851	222976	249106	184780	241059	216959	102485	78767.2	131422	105068	78681.8	107648	113321	17.9264	17.4954	17.879	17.7271	16.2653	17.0038	16.681	16.2637	16.716	16.7901	8	8	7	8	5	5	3	7	7	5	7	5	9	9	9	9	9	9	9	9	9
>ENSSSCP00000014518	3	0.462968	0.00201461	ICAM1	none	Sus scrofa intercellular adhesion molecule-1 (ICAM-1), mRNA. [Source:RefSeq mRNA;Acc:NM_213816]|2|ENSSSCG00000013655|ENSSSCT00000014919	41710.2	54942.8	35178.5	37904	38815.6	19310.5	10731	25140	22299.5	27344.1	15297.6	15050.7	15.7456	15.1024	15.2101	15.2444	13.3895	14.6177	14.4447	14.7389	13.901	13.8775	1	2	0	1	1	1	0	0	0	0	0	0	3	3	3	3	3	3	3	3	3
>ENSSSCP00000023415	4	0.465604	0.000200156	COL16A1	Collagens	Uncharacterized protein [Source:UniProtKB/TrEMBL;Acc:I3LH70]|13|ENSSSCG00000030160|ENSSSCT00000027870	76366.4	96334	70395.1	68094.3	70642	35556.5	32642.4	29183.2	45871.8	31122.1	32420.6	42098.7	16.5558	16.1032	16.0552	16.1082	14.9945	14.8328	15.4853	14.9257	14.9846	15.3615	2	5	3	1	3	3	2	1	1	1	3	2	4	4	4	4	4	4	4	4	4
>ENSSSCP00000003343	2	0.466157	0.0222541	APOE	none	apolipoprotein E [Source:HGNC Symbol;Acc:613]|6|ENSSSCG00000003088|ENSSSCT00000003426	19528.1	31586	14717.9	13961.2	17847.2	9103.16	7959.23	14139.5	3797.08	6136.87	5852.76	16733.5	14.947	13.8453	13.7691	14.1234	12.9584	13.7874	11.8907	12.5833	12.5149	14.0305	1	2	2	0	4	1	0	2	0	1	1	1	2	2	2	2	2	2	2	2	2
>ENSSSCP00000016990	25	0.474824	2.88614e-05	COL5A2	Collagens	Sus scrofa collagen, type V, alpha 2 (COL5A2), mRNA. [Source:RefSeq mRNA;Acc:NM_001105289]|15|ENSSSCG00000016035|ENSSSCT00000017460	2.12435e+06	2.39787e+06	1.81859e+06	2.07385e+06	2.20708e+06	1.00869e+06	1077568	1.17905e+06	1.10825e+06	889777	893352	904149	21.1933	20.7944	20.9839	21.0737	20.0393	20.1692	20.0798	19.7631	19.7689	19.7862	24	31	27	28	17	19	11	13	15	15	17	15	25	25	25	25	25	25	25	25	25
>ENSSSCP00000012523	2	0.47573	0.00221904	FNDC3B	none	Uncharacterized protein [Source:UniProtKB/TrEMBL;Acc:F1SH12]|13|ENSSSCG00000011752|ENSSSCT00000012863	39931.5	35808.4	38218.2	50121.7	35577.7	18996.6	21731.5	13233.3	34260.2	12848	17002.8	14903.9	15.128	15.222	15.6131	15.1187	14.4075	13.6919	15.0642	13.6493	14.0535	13.8634	1	2	1	2	0	0	0	1	0	1	0	0	2	2	2	2	2	2	2	2	2
>ENSSSCP00000003918	7	0.485819	0.0022072	MARCKSL1	none	Uncharacterized protein [Source:UniProtKB/TrEMBL;Acc:F1SV88]|6|ENSSSCG00000003614|ENSSSCT00000004009	8.24937e+06	6204541	10168893	8349981	8.27408e+06	4007705	3.51916e+06	4318377	3.53706e+06	4487215	4547606	3.6368e+06	22.5649	23.2777	22.9933	22.9802	21.7468	22.0421	21.7541	22.0974	22.1167	21.7942	7	7	8	7	7	6	6	7	6	7	7	6	7	7	7	7	7	7	7	7	7
>ENSSSCP00000027199	13	0.486041	1.37545e-07	COL2A1	Collagens	collagen, type II, alpha 1 [Source:HGNC Symbol;Acc:2200]|GL893359.2|ENSSSCG00000025523|ENSSSCT00000031054	462517	449411	464779	463983	471894	224802	210361	224497	246698	234368	225989	206899	18.7777	18.8262	18.8237	18.8481	17.6825	17.7763	17.9124	17.8384	17.7859	17.6586	11	12	10	12	6	10	9	9	10	12	12	10	13	13	13	13	13	13	13	13	13
>ENSSSCP00000007311	9	0.493531	0.00097497	COL11A1	Collagens	collagen, type XI, alpha 1 [Source:HGNC Symbol;Acc:2186]|4|ENSSSCG00000006857|ENSSSCT00000007510	206716	221169	202176	200476	203041	102021	58473.9	103038	106901	121249	100225	122236	17.7548	17.6253	17.6131	17.6314	15.8355	16.6528	16.7059	16.8876	16.6129	16.8993	5	9	7	8	3	3	1	2	5	6	4	3	9	9	9	9	9	9	9	9	9
>ENSSSCP00000020759	3	0.494623	0.000546099	CST3	ECM Regulators	Sus scrofa cystatin C (CST3), mRNA. [Source:RefSeq mRNA;Acc:NM_001044602]|17|ENSSSCG00000029889|ENSSSCT00000027339	574154	482694	573222	627733	612964	283989	182342	357201	240637	353239	326349	244169	18.8808	19.1287	19.2598	19.2254	17.4763	18.4464	17.8765	18.4303	18.3161	17.8975	2	3	3	3	2	1	1	2	2	2	2	1	3	3	3	3	3	3	3	3	3
>ENSSSCP00000003392	2	0.501886	0.0183888	GRWD1	none	glutamate-rich WD repeat containing 1 [Source:HGNC Symbol;Acc:21270]|6|ENSSSCG00000003134|ENSSSCT00000003475	8961.88	5757.83	11863.9	10784.3	7441.52	4497.84	5125.47	3194.49	4126.67	6391.41	6002.6	2146.41	12.4913	13.5343	13.3966	12.8614	12.3235	11.6414	12.0108	12.6419	12.5514	11.0677	0	2	2	0	0	1	0	0	0	0	0	0	2	2	2	2	2	2	2	2	2
>ENSSSCP00000017801	5	0.512932	0.000117561	CDH6	none	cadherin 6, type 2, K-cadherin (fetal kidney) [Source:HGNC Symbol;Acc:1765]|16|ENSSSCG00000016806|ENSSSCT00000018296	59192.4	49868.6	58133.9	61282.9	67484.2	30361.7	29031.9	27402	23066.8	30053.8	38414.4	34201	15.6058	15.8271	15.9032	16.0423	14.8254	14.742	14.4935	14.8753	15.2294	15.0618	3	7	3	5	1	3	1	0	0	0	1	1	5	5	5	5	5	5	5	5	5
>ENSSSCP00000001567	3	0.517312	0.0158233	HLA-DRA	none	Sus scrofa MHC class II DR-alpha (SLA-DRA), mRNA. [Source:RefSeq mRNA;Acc:NM_001113706]|7|ENSSSCG00000001453|ENSSSCT00000001609	73218.4	69837.8	62188.6	79392.8	81454.2	37876.8	25010.3	95341.4	30069.5	30924	28147.2	17768.2	16.0917	15.9244	16.2767	16.3137	14.6102	16.5408	14.876	14.9164	14.7807	14.117	1	1	1	2	1	1	1	1	1	1	1	1	3	3	3	3	3	3	3	3	3
>ENSSSCP00000004370	13	0.522607	0.039272	IGF2R	none	Sus scrofa insulin-like growth factor 2 receptor (IGF2R), mRNA. [Source:RefSeq mRNA;Acc:NM_001244473]|1|ENSSSCG00000004044|ENSSSCT00000004472	153146	127954	113666	249180	121786	80035.4	69438.2	74569.8	72297.5	75344.1	103085	85478.4	16.9653	16.7944	17.9268	16.894	16.0834	16.1863	16.1417	16.2012	16.6535	16.3833	8	11	9	14	4	7	5	6	5	12	8	6	13	13	13	13	13	13	13	13	13
>ENSSSCP00000026158	4	0.527295	0.000203148	TNS1	none	tensin 1 [Source:HGNC Symbol;Acc:11973]|15|ENSSSCG00000027669|ENSSSCT00000024203	62622.4	57310.2	63918.9	64885.7	64374.7	33020.5	31786.1	44896.5	31244.7	29782.8	35420.7	24992.1	15.8065	15.964	15.9856	15.9742	14.9561	15.4543	14.9313	14.8622	15.1123	14.6092	4	6	4	6	1	2	3	1	1	2	3	2	4	4	4	4	4	4	4	4	4
>ENSSSCP00000000308	19	0.533238	2.27697e-05	ITGA5	none	Uncharacterized protein [Source:UniProtKB/TrEMBL;Acc:F1SR53]|5|ENSSSCG00000000293|ENSSSCT00000000314	1.10175e+06	960214	1.09216e+06	1.18543e+06	1.16921e+06	587496	531609	682809	673835	522204	564513	550007	19.873	20.0587	20.177	20.1571	19.02	19.3811	19.362	18.9943	19.1066	19.0691	18	22	21	21	17	16	13	13	12	15	15	14	19	19	19	19	19	19	19	19	19
>ENSSSCP00000026757	3	0.537575	9.14667e-06	MYL9	none	Sus scrofa myosin, light chain 9, regulatory (MYL9), mRNA. [Source:RefSeq mRNA;Acc:NM_001244472]|17|ENSSSCG00000024230|ENSSSCT00000023008	598290	582499	597625	614696	598340	321625	274318	318708	329779	298806	351903	356239	19.1519	19.1889	19.2295	19.1906	18.0655	18.2819	18.3311	18.1889	18.4248	18.4425	3	3	3	3	3	3	3	3	3	3	3	3	3	3	3	3	3	3	3	3	3
>ENSSSCP00000012480	2	0.542487	0.000102199	TSC22D2	none	TSC22 domain family, member 2 [Source:HGNC Symbol;Acc:29095]|13|ENSSSCG00000011708|ENSSSCT00000012818	30399.4	28723.5	33160	29185.8	30528.4	16491.3	16574.4	22618.5	14624.4	14566.2	16261.8	14302.3	14.8099	15.0172	14.833	14.8979	14.0167	14.4652	13.8361	13.8303	13.9892	13.804	2	1	2	2	0	0	0	0	0	0	1	0	2	2	2	2	2	2	2	2	2
>ENSSSCP00000012355	9	0.549249	0.00729026	PLXND1	ECM-affiliated Proteins	plexin D1 [Source:HGNC Symbol;Acc:9107]|13|ENSSSCG00000011592|ENSSSCT00000012688	181468	245345	168971	164119	147438	99671.2	62268.1	156720	86161.2	92010	76938.7	123929	17.9045	17.3664	17.3244	17.1697	15.9262	17.2578	16.3948	16.4895	16.2314	16.9191	5	8	5	8	1	2	1	2	3	2	4	3	9	9	9	9	9	9	9	9	9
>ENSSSCP00000011058	17	0.551261	2.37553e-05	ANXA8	ECM-affiliated Proteins	Sus scrofa annexin A8 (ANXA8), mRNA. [Source:RefSeq mRNA;Acc:NM_001243599]|14|ENSSSCG00000010370|ENSSSCT00000011352	1.7028e+06	1.85889e+06	1.68303e+06	1.50623e+06	1.76305e+06	938688	980476	1.071e+06	924006	808247	801282	1.04712e+06	20.826	20.6826	20.5225	20.7496	19.9031	20.0305	19.8175	19.6244	19.612	19.998	17	18	16	18	19	14	11	15	12	10	12	15	17	17	17	17	17	17	17	17	17
>ENSSSCP00000011258	3	0.551661	6.92936e-05	NPM3	none	nucleophosmin/nucleoplasmin 3 [Source:HGNC Symbol;Acc:7931]|14|ENSSSCG00000010568|ENSSSCT00000011560	69512.8	66072.5	64105.2	79438.5	68435.3	38347.5	35304	47134.6	33536.9	37291.9	44830.1	31987.7	16.0118	15.9682	16.2776	16.0625	15.1075	15.5245	15.0335	15.1866	15.4522	14.9652	2	2	2	2	2	2	2	2	2	2	2	2	3	3	3	3	3	3	3	3	3
>ENSSSCP00000004106	2	0.557818	0.00949731	WLS	none	Uncharacterized protein [Source:UniProtKB/TrEMBL;Acc:F1S829]|6|ENSSSCG00000003795|ENSSSCT00000004200	31810.1	44570.8	27971.4	25241.5	29456.7	17744.2	25514.1	15759.4	15075.9	17661.8	13906.6	18547.6	15.4438	14.7717	14.6235	14.8463	14.639	13.9439	13.88	14.1083	13.7635	14.1789	3	2	2	2	1	1	1	1	1	0	2	1	2	2	2	2	2	2	2	2	2
>ENSSSCP00000018965	2	0.559741	0.0415381	SPAG7	none	sperm associated antigen 7 [Source:HGNC Symbol;Acc:11216]|12|ENSSSCG00000017903|ENSSSCT00000019483	34438.7	30473.9	28571	24127.3	54582.6	19276.7	24981	10714.2	14747.5	20315	21974.2	22928.6	14.8953	14.8023	14.5584	15.7362	14.6085	13.3872	13.8482	14.3103	14.4235	14.4849	0	1	0	0	0	1	0	0	2	2	1	1	2	2	2	2	2	2	2	2	2
>ENSSSCP00000000387	3	0.561289	0.000209344	DGKA	none	Sus scrofa diacylglycerol kinase, alpha 80kDa (DGKA), mRNA. [Source:RefSeq mRNA;Acc:NM_214032]|5|ENSSSCG00000000370|ENSSSCT00000000393	52279.5	59367.3	48956.4	45499.5	55294.7	29343.9	27845	36564.3	23638.4	27881.1	25985.6	34149	15.8574	15.5792	15.4736	15.7549	14.7651	15.1581	14.5288	14.767	14.6654	15.0596	3	3	2	4	1	2	1	2	1	2	3	1	3	3	3	3	3	3	3	3	3
>ENSSSCP00000011180	10	0.573821	0.00459063	PDLIM1	none	|14|ENSSSCG00000010493|ENSSSCT00000011481	605492	693333	516614	628520	583501	347444	214055	475932	281022	273048	442739	397868	19.4032	18.9787	19.2616	19.1544	17.7076	18.8604	18.1003	18.0588	18.7561	18.6019	13	13	13	12	9	10	8	11	11	8	13	11	10	10	10	10	10	10	10	10	10
>ENSSSCP00000006625	2	0.574499	0.0367038	RRS1	none	RRS1 ribosome biogenesis regulator homolog (S. cerevisiae) [Source:HGNC Symbol;Acc:17083]|4|ENSSSCG00000006214|ENSSSCT00000006810	183021	109169	209497	229074	184345	105146	60155.6	76980.2	171550	98803.1	112775	110610	16.7362	17.6766	17.8055	17.4921	15.8764	16.2322	17.3883	16.5923	16.7831	16.7551	1	1	2	2	2	1	1	1	3	1	1	2	2	2	2	2	2	2	2	2	2
>ENSSSCP00000004580	5	0.575058	0.00139505	GJA1	none	gap junction protein, alpha 1, 43kDa [Source:HGNC Symbol;Acc:4274]|1|ENSSSCG00000004241|ENSSSCT00000004688	125973	103209	146408	120546	133728	72441.6	68215.3	82728.4	47823.6	66441.1	83668.7	85772.7	16.6552	17.1596	16.8792	17.0289	16.0578	16.3361	15.5454	16.0198	16.3524	16.3882	4	5	5	5	1	0	3	2	2	4	4	3	5	5	5	5	5	5	5	5	5
>ENSSSCP00000018098	5	0.577917	0.0021115	SPARC	ECM Glycoproteins	SPARC precursor [Source:RefSeq peptide;Acc:NP_001026964]|GL894053.2|ENSSSCG00000017083|ENSSSCT00000018599	1.53507e+06	1.26832e+06	1.54796e+06	1.86852e+06	1455507	887146	733959	947236	956661	959029	920323	805671	20.2745	20.5619	20.8335	20.4731	19.4853	19.8534	19.8676	19.8712	19.8118	19.6198	11	11	11	11	11	11	10	10	11	11	11	11	5	5	5	5	5	5	5	5	5
>ENSSSCP00000006929	14	0.580883	0.00637498	ARHGEF2	none	Rho/Rac guanine nucleotide exchange factor (GEF) 2 [Source:HGNC Symbol;Acc:682]|4|ENSSSCG00000006502|ENSSSCT00000007121	124144	145365	103799	106906	140507	72113.4	74646.3	64885.6	76746.2	69602.8	70242.6	76556.8	17.1493	16.6634	16.706	17.1003	16.1878	15.9856	16.2278	16.0869	16.1001	16.2242	11	11	9	11	8	7	6	5	6	11	6	9	14	14	14	14	14	14	14	14	14
>ENSSSCP00000002767	3	0.588247	0.000265616	PLD4	none	phospholipase D family, member 4 [Source:HGNC Symbol;Acc:23792]|7|ENSSSCG00000002554|ENSSSCT00000002839	77830.1	79428.7	77808.2	75717.8	78365.9	45783.4	44452.8	37448.1	54017.8	42237.3	54705.5	41838.7	16.2774	16.2476	16.2083	16.2579	15.44	15.1926	15.7211	15.3662	15.7394	15.3525	2	3	3	3	2	1	3	1	1	3	2	2	3	3	3	3	3	3	3	3	3
>ENSSSCP00000007174	2	0.591008	0.00683009	WDR3	none	WD repeat domain 3 [Source:HGNC Symbol;Acc:12755]|4|ENSSSCG00000006727|ENSSSCT00000007369	9437.91	9153.77	7771.47	8735.12	12091.3	5577.88	8191.97	4809.38	6846.09	3834.12	5603.71	4182.02	13.1602	12.924	13.0926	13.5617	13	12.2316	12.7411	11.9047	12.4522	12.03	0	2	1	1	0	0	0	0	0	0	1	0	2	2	2	2	2	2	2	2	2
>ENSSSCP00000011165	27	0.598202	0.00010363	MYOF	none	Uncharacterized protein [Source:UniProtKB/TrEMBL;Acc:F1SC82]|14|ENSSSCG00000010476|ENSSSCT00000011464	498568	499592	472583	458197	563900	298244	338970	287922	290180	314877	287189	270329	18.9304	18.8502	18.8056	19.1051	18.3708	18.1353	18.1466	18.2644	18.1316	18.0444	28	37	29	36	16	15	17	10	9	8	15	13	27	27	27	27	27	27	27	27	27
>ENSSSCP00000012374	3	0.598794	0.002364	NUP210	none	nucleoporin 210kDa [Source:HGNC Symbol;Acc:30052]|13|ENSSSCG00000011610|ENSSSCT00000012707	32896.9	32822.6	28811.1	35864.6	34089.4	19698.5	29735.8	20506.4	18128.2	14068.3	16228.8	19523.4	15.0024	14.8143	15.1303	15.057	14.8599	14.3238	14.1459	13.7802	13.9863	14.2529	2	3	3	3	0	1	2	1	1	2	2	1	3	3	3	3	3	3	3	3	3
>ENSSSCP00000003724	21	0.599328	4.27385e-07	PLOD1	ECM Regulators	procollagen-lysine, 2-oxoglutarate 5-dioxygenase 1 [Source:HGNC Symbol;Acc:9081]|6|ENSSSCG00000003433|ENSSSCT00000003811	590729	592322	611582	553348	605663	354040	374877	350286	366699	366272	320534	345572	19.176	19.2222	19.0778	19.2082	18.5161	18.4182	18.4842	18.4826	18.2901	18.3986	18	21	15	18	14	10	9	13	14	18	14	16	21	21	21	21	21	21	21	21	21
>ENSSSCP00000002993	2	0.600565	0.000200231	FAM65A	none	family with sequence similarity 65, member A [Source:HGNC Symbol;Acc:25836]|6|ENSSSCG00000002774|ENSSSCT00000003072	12706.2	13214.2	10842.1	13275.6	13492.9	7630.9	6747.85	7883.29	8489.85	8234.61	6877.15	7552.67	13.6898	13.4044	13.6965	13.7199	12.7202	12.9446	13.0515	13.0075	12.7476	12.8828	2	1	1	1	0	0	1	1	1	0	2	0	2	2	2	2	2	2	2	2	2
>ENSSSCP00000011910	2	0.602132	0.000487832	LARP4B	none	La ribonucleoprotein domain family, member 4B [Source:HGNC Symbol;Acc:28987]|10|ENSSSCG00000011162|ENSSSCT00000012224	13011.8	14796.3	10962.9	13197.3	13090.7	7834.83	6353.52	7386.61	8261.48	9272.57	7959.03	7775.77	13.8529	13.4203	13.688	13.6763	12.6333	12.8507	13.0122	13.1788	12.9584	12.9248	1	2	2	1	0	0	1	0	2	2	1	1	2	2	2	2	2	2	2	2	2
>ENSSSCP00000012201	2	0.606786	0.00816557	GNL3	none	guanine nucleotide binding protein-like 3 (nucleolar) [Source:HGNC Symbol;Acc:29931]|13|ENSSSCG00000011449|ENSSSCT00000012529	11248.1	14084.9	10050.9	10564.8	10291.8	6825.19	9736.63	5647.43	8620.72	4650.39	4795.22	7500.73	13.7819	13.295	13.367	13.3292	13.2492	12.4634	13.0736	12.1831	12.2274	12.8728	0	2	2	1	0	0	1	0	0	0	1	0	2	2	2	2	2	2	2	2	2
>ENSSSCP00000003829	2	0.608585	0.00015748	C1QB	ECM-affiliated Proteins	Uncharacterized protein [Source:UniProtKB/TrEMBL;Acc:F1STZ1]|6|ENSSSCG00000003528|ENSSSCT00000003919	78147.7	73784.7	78965.2	75333.5	84507.3	47559.5	37221.8	45339.3	56126.1	53630.6	49751.5	43287.8	16.171	16.2689	16.201	16.3668	15.1839	15.4685	15.7764	15.7108	15.6025	15.4017	2	1	1	2	1	1	1	1	2	1	1	1	2	2	2	2	2	2	2	2	2
>ENSSSCP00000012474	2	0.608849	0.000313943	TM4SF1	none	transmembrane 4 L six family member 1 [Source:HGNC Symbol;Acc:11853]|13|ENSSSCG00000011702|ENSSSCT00000012812	116793	118572	111190	117435	119975	71109.2	59415.7	89271.8	62911.8	64327.7	78907.2	71820.7	16.8554	16.7627	16.8415	16.8724	15.8586	16.4459	15.941	15.9732	16.2679	16.1321	2	2	2	2	2	2	1	2	2	2	2	2	2	2	2	2	2	2	2	2	2
>ENSSSCP00000019428	4	0.610118	0.0273907	RBM3	none	Sus scrofa RNA binding motif (RNP1, RRM) protein 3 (RBM3), mRNA. [Source:RefSeq mRNA;Acc:NM_001243419]|X|ENSSSCG00000021591|ENSSSCT00000030983	622779	477044	583000	777033	654039	379969	169137	504518	319596	385999	549572	350988	18.8638	19.1531	19.5676	19.319	17.3678	18.9445	18.2859	18.5582	19.068	18.4211	5	5	5	5	4	4	4	5	4	5	5	5	4	4	4	4	4	4	4	4	4
>ENSSSCP00000012297	16	0.610512	2.05498e-06	LMCD1	none	Sus scrofa LIM and cysteine-rich domains 1 (LMCD1), mRNA. [Source:RefSeq mRNA;Acc:NM_001008692]|13|ENSSSCG00000011538|ENSSSCT00000012628	1.45051e+06	1.48271e+06	1.34863e+06	1.51457e+06	1.45614e+06	885555	794592	1.00094e+06	908394	854145	908621	846641	20.4998	20.3631	20.5305	20.4737	19.5999	19.9329	19.793	19.7041	19.7933	19.6914	15	16	15	15	14	14	14	14	15	16	16	15	16	16	16	16	16	16	16	16	16
>ENSSSCP00000001804	29	0.613931	8.61689e-05	PTK7	none	protein tyrosine kinase 7 [Source:HGNC Symbol;Acc:9618]|7|ENSSSCG00000001660|ENSSSCT00000001851	1.90552e+06	2.15595e+06	1.82461e+06	1.77629e+06	1.86523e+06	1.16986e+06	1.19215e+06	1.4326e+06	1.02384e+06	1044953	1.08948e+06	1236128	21.0399	20.7992	20.7604	20.8309	20.1851	20.4502	19.9656	19.995	20.0552	20.2374	26	29	27	27	22	19	23	25	25	25	28	25	29	29	29	29	29	29	29	29	29
>ENSSSCP00000018463	10	0.614704	1.93177e-06	FKBP10	none	FK506 binding protein 10, 65 kDa [Source:HGNC Symbol;Acc:18169]|12|ENSSSCG00000017422|ENSSSCT00000018968	1.59492e+06	1.63222e+06	1.48037e+06	1.63439e+06	1.63268e+06	980401	977714	1.00157e+06	993437	925614	927484	1056581	20.6384	20.4975	20.6403	20.6388	19.8991	19.9338	19.9221	19.8201	19.823	20.011	10	10	10	11	9	8	10	9	10	10	10	10	10	10	10	10	10	10	10	10	10
>ENSSSCP00000025418	10	0.615575	0.0113131	RCN3	none	reticulocalbin 3, EF-hand calcium binding domain [Source:HGNC Symbol;Acc:21145]|6|ENSSSCG00000024823|ENSSSCT00000026102	405088	315709	437901	494279	372464	249362	145106	297242	254602	246646	335583	216993	18.2682	18.7402	18.915	18.5067	17.1468	18.1813	17.9579	17.9121	18.3563	17.7273	9	9	9	8	2	6	3	9	6	9	9	7	10	10	10	10	10	10	10	10	10
>ENSSSCP00000011838	2	0.619626	8.88371e-05	ITGB1	none	integrin, beta 1 (fibronectin receptor, beta polypeptide, antigen CD29 includes MDF2, MSK12) [Source:HGNC Symbol;Acc:6153]|10|ENSSSCG00000011101|ENSSSCT00000012148	321729	350424	304078	291646	340767	199351	221809	182147	203746	173868	206011	208529	18.4187	18.2141	18.1539	18.3784	17.759	17.4747	17.6364	17.4076	17.6524	17.6699	24	26	25	25	24	23	21	23	23	24	23	25	2	2	2	2	2	2	2	2	2
>ENSSSCP00000008698	6	0.630955	0.0088812	FHL2	none	four and a half LIM domains 2 [Source:HGNC Symbol;Acc:3703]|3|ENSSSCG00000008147|ENSSSCT00000008924	214209	227751	178491	259588	191007	135156	85441.6	193837	149094	116199	130965	135403	17.7971	17.4455	17.9859	17.5433	16.3827	17.5645	17.1859	16.8262	16.9988	17.0469	7	6	8	6	4	4	4	6	6	5	6	6	6	6	6	6	6	6	6	6	6
>ENSSSCP00000021995	4	0.631688	0.00072964	ITGAL	none	Uncharacterized protein [Source:UniProtKB/TrEMBL;Acc:I3LD66]|GL894598.2|ENSSSCG00000027764|ENSSSCT00000029241	135612	146042	121159	137623	137622	85664.4	85423.1	85453.6	81462.9	88552.8	86861.1	86233	17.156	16.8865	17.0704	17.0704	16.3823	16.3829	16.3139	16.4342	16.4064	16.396	4	4	4	4	3	4	4	3	4	4	4	3	4	4	4	4	4	4	4	4	4
>ENSSSCP00000013478	8	0.639514	0.00792406	GPC4	ECM-affiliated Proteins	glypican 4 [Source:HGNC Symbol;Acc:4452]|X|ENSSSCG00000012679|ENSSSCT00000013861	136326	138920	135353	128921	142112	87182.6	72169.6	144975	71234.2	79569.9	67893.6	87253.6	17.0839	17.0464	16.9761	17.1167	16.1391	17.1454	16.1203	16.2799	16.051	16.4129	5	6	6	5	1	4	3	2	3	3	4	4	8	8	8	8	8	8	8	8	8
>ENSSSCP00000022472	8	0.643514	0.0271956	TGM2	ECM Regulators	transglutaminase 2 [Source:HGNC Symbol;Acc:11778]|17|ENSSSCG00000023522|ENSSSCT00000031001	212200	290570	166100	186225	205906	136554	172411	142346	115610	146781	135075	107099	18.1485	17.3417	17.5067	17.6516	17.3955	17.119	16.8189	17.1633	17.0434	16.7086	7	4	4	5	8	7	4	3	4	3	4	4	8	8	8	8	8	8	8	8	8
>ENSSSCP00000007286	3	0.650542	0.00148519	SORT1	none	Uncharacterized protein [Source:UniProtKB/TrEMBL;Acc:F1S5Z7]|4|ENSSSCG00000006831|ENSSSCT00000007482	42542.1	36557.6	48964.6	39933.4	44712.9	27675.4	26538.6	24435.7	31852.1	31350.4	28774	23101.7	15.1579	15.5795	15.2853	15.4484	14.6958	14.5767	14.9591	14.9362	14.8125	14.4957	2	4	3	2	2	2	2	1	2	2	3	2	3	3	3	3	3	3	3	3	3
>ENSSSCP00000005709	7	0.653851	0.00019666	TPM2	none	Sus scrofa tropomyosin 2 (beta) (TPM2), mRNA. [Source:RefSeq mRNA;Acc:NM_001129947]|1|ENSSSCG00000005316|ENSSSCT00000005854	2.5016e+06	2.70122e+06	2.47924e+06	2.3075e+06	2.51842e+06	1.63567e+06	1.3828e+06	1.75209e+06	1.4765e+06	1.4802e+06	1.75553e+06	1.96691e+06	21.3652	21.2415	21.1379	21.2641	20.3992	20.7406	20.4937	20.4974	20.7435	20.9075	11	12	11	12	10	10	11	11	12	12	12	12	7	7	7	7	7	7	7	7	7
>ENSSSCP00000000703	3	0.658971	0.000543971	M6PR	none	mannose-6-phosphate receptor (cation dependent) [Source:HGNC Symbol;Acc:6752]|5|ENSSSCG00000000662|ENSSSCT00000000718	79647.9	71521.3	89644.2	81546.7	75879.5	52485.6	61093.7	41337.5	58276.3	49535.6	49154.3	55516.4	16.1261	16.4519	16.3153	16.2114	15.8987	15.3352	15.8306	15.5962	15.585	15.7606	2	2	2	3	2	2	1	1	2	2	2	1	3	3	3	3	3	3	3	3	3
>ENSSSCP00000020951	6	0.658973	0.000377735	PLOD3	ECM Regulators	procollagen-lysine, 2-oxoglutarate 5-dioxygenase 3 [Source:HGNC Symbol;Acc:9083]|GL894574.1|ENSSSCG00000028879|ENSSSCT00000030873	126092	139706	115598	123999	125064	83090.9	89714.6	92055.6	99003.1	70945.4	70184.7	76642.2	17.092	16.8188	16.92	16.9323	16.4531	16.4902	16.5952	16.1144	16.0989	16.2259	5	7	4	6	2	3	2	2	3	3	4	3	6	6	6	6	6	6	6	6	6
>ENSSSCP00000018236	4	0.659291	0.0364682	HN1	none	hematological and neurological expressed 1 [Source:HGNC Symbol;Acc:14569]|12|ENSSSCG00000017213|ENSSSCT00000018738	224305	170241	212239	282649	232089	147882	79948.1	212147	127499	140730	200864	126105	17.3772	17.6953	18.1087	17.8243	16.2868	17.6947	16.9601	17.1026	17.6159	16.9443	2	5	4	4	1	2	2	3	4	4	5	4	4	4	4	4	4	4	4	4	4
>ENSSSCP00000011124	2	0.659671	0.01434	MINPP1	none	multiple inositol-polyphosphate phosphatase 1 [Source:HGNC Symbol;Acc:7102]|14|ENSSSCG00000010435|ENSSSCT00000011420	15721.2	15668	15366	12213.5	19637.3	10370.8	12745.8	8539.47	9442.03	10215	9827.9	11454.5	13.9355	13.9074	13.5762	14.2613	13.6377	13.0599	13.2049	13.3184	13.2627	13.4836	1	2	1	0	0	1	0	0	0	2	2	1	2	2	2	2	2	2	2	2	2
>ENSSSCP00000001934	2	0.664544	0.0126954	CTSH	ECM Regulators	Sus scrofa cathepsin H (CTSH), mRNA. [Source:RefSeq mRNA;Acc:NM_213929]|7|ENSSSCG00000001770|ENSSSCT00000001983	56915	44760.3	56838.8	70000.5	56060.5	37822.5	26963.9	34354.7	32416.9	42260.8	48266.4	42672.5	15.4499	15.7946	16.0951	15.7747	14.7187	15.0682	14.9845	15.367	15.5587	15.381	2	2	3	2	1	2	1	2	2	2	2	2	2	2	2	2	2	2	2	2	2
>ENSSSCP00000024485	10	0.665823	0.00512578	EIF4H	none	Sus scrofa heterogeneous nuclear ribonucleoprotein C (C1/C2) (HNRNPC), transcript variant 1, mRNA. [Source:RefSeq mRNA;Acc:NM_001243693]|GL894341.1|ENSSSCG00000028640|ENSSSCT00000023644	2.34921e+06	2.41698e+06	2.11636e+06	2706219	2.15727e+06	1.56416e+06	1.83808e+06	2.08651e+06	1.36898e+06	1.08577e+06	1.49099e+06	1.51462e+06	21.2048	21.0132	21.3678	21.0408	20.8098	20.9927	20.3847	20.0503	20.5078	20.5305	13	10	11	12	10	11	11	12	11	10	12	11	10	10	10	10	10	10	10	10	10
>ENSSSCP00000023189	26	0.666074	0.001042	TNKS1BP1	none	tankyrase 1 binding protein 1, 182kDa [Source:HGNC Symbol;Acc:19081]|2|ENSSSCG00000028527|ENSSSCT00000032273	660893	587793	713245	640498	702034	440203	407467	447441	429547	449911	467044	439808	19.1649	19.444	19.2888	19.4212	18.6363	18.7713	18.7125	18.7793	18.8332	18.7465	26	32	25	29	9	19	20	22	21	28	31	22	26	26	26	26	26	26	26	26	26
>ENSSSCP00000007501	3	0.673352	0.00566345	PRNP	none	Sus scrofa prion protein (PRNP), mRNA. [Source:RefSeq mRNA;Acc:NM_001008687]|17|ENSSSCG00000007039|ENSSSCT00000007708	55749.2	64897.1	47863.4	54229.2	56006.9	37538.8	53956.7	40594.3	32413.2	35612.8	28735.6	33920	15.9859	15.5466	15.7268	15.7733	15.7195	15.309	14.9843	15.1201	14.8106	15.0498	3	3	3	3	1	0	1	0	2	1	2	2	3	3	3	3	3	3	3	3	3
>ENSSSCP00000004575	2	0.673641	0.00456081	SERINC1	none	Uncharacterized protein [Source:UniProtKB/TrEMBL;Acc:F1SF57]|1|ENSSSCG00000004237|ENSSSCT00000004682	34909.3	29763.9	39956.1	36777.7	33139.7	23516.4	24857.1	23374.1	21157.1	22345.7	24365.8	24998.4	14.8613	15.2861	15.1665	15.0163	14.6014	14.5126	14.3689	14.4477	14.5726	14.6095	1	2	2	2	1	1	2	2	2	2	2	2	2	2	2	2	2	2	2	2	2
>ENSSSCP00000018266	2	0.674311	0.000667397	RPL38	none	ribosomal protein L38 [Source:HGNC Symbol;Acc:10349]|12|ENSSSCG00000017239|ENSSSCT00000018768	859551	961522	766708	867928	842046	579605	533647	720552	596037	565822	592163	469407	19.875	19.5483	19.7272	19.6835	19.0255	19.4587	19.185	19.11	19.1756	18.8405	2	2	2	2	2	2	2	2	2	2	2	2	2	2	2	2	2	2	2	2	2
>ENSSSCP00000003613	6	0.676621	0.000698053	SDF4	none	stromal cell derived factor 4 [Source:HGNC Symbol;Acc:24188]|6|ENSSSCG00000003332|ENSSSCT00000003699	116361	109986	127789	124153	103518	78732.6	92406.5	90675.3	67960.9	73168.5	76386.9	71797.3	16.747	16.9634	16.9218	16.6595	16.4957	16.4684	16.0524	16.1589	16.221	16.1316	4	8	6	5	1	2	4	1	4	5	5	4	6	6	6	6	6	6	6	6	6
>ENSSSCP00000003786	21	0.676672	0.000979311	UBR4	none	Uncharacterized protein [Source:UniProtKB/TrEMBL;Acc:F1SUQ5]|6|ENSSSCG00000003488|ENSSSCT00000003874	655609	745477	572606	654804	649549	443632	474941	460354	358902	446885	415847	504866	19.5078	19.1272	19.3207	19.3091	18.8574	18.8124	18.4532	18.7695	18.6657	18.9455	12	14	9	14	8	11	12	15	14	21	17	18	21	21	21	21	21	21	21	21	21
>ENSSSCP00000003361	2	0.677281	0.0117603	SLC1A5	none	solute carrier family 1 (neutral amino acid transporter), member 5 [Source:HGNC Symbol;Acc:10943]|6|ENSSSCG00000003105|ENSSSCT00000003444	13171.1	14329.9	13718.5	10154	14481.9	8920.52	9281.21	8350.58	9698.88	10281.4	10041.6	5869.44	13.8067	13.7438	13.3098	13.822	13.1801	13.0277	13.2436	13.3278	13.2937	12.519	1	1	1	2	1	1	1	0	1	1	1	1	2	2	2	2	2	2	2	2	2
>ENSSSCP00000017046	13	0.681928	0.0192857	SPATS2L	none	spermatogenesis associated, serine-rich 2-like [Source:HGNC Symbol;Acc:24574]|15|ENSSSCG00000016090|ENSSSCT00000017518	155838	119629	174056	178467	151199	106270	99026.1	92696	119949	111570	110092	104290	16.8682	17.4092	17.4453	17.2061	16.5955	16.5002	16.8721	16.7676	16.7483	16.6702	7	11	9	6	3	4	7	5	11	12	10	6	13	13	13	13	13	13	13	13	13
>ENSSSCP00000003960	3	0.685005	0.00827755	KIAA0754	none	KIAA0754 [Source:HGNC Symbol;Acc:29111]|6|ENSSSCG00000003655|ENSSSCT00000004051	48548.1	56734.8	48629.6	43598.2	45229.7	33255.7	34578	27780.7	50027.1	28054.9	32634.7	26458.6	15.7919	15.5695	15.412	15.465	15.0776	14.7618	15.6104	14.776	14.9941	14.6914	1	3	1	1	0	0	0	0	1	2	2	1	3	3	3	3	3	3	3	3	3
>ENSSSCP00000006014	24	0.685014	0.00152227	FAM129B	none	family with sequence similarity 129, member B [Source:HGNC Symbol;Acc:25282]|1|ENSSSCG00000005614|ENSSSCT00000006173	1.76012e+06	1.97291e+06	1.63364e+06	1.56595e+06	1.86796e+06	1.2057e+06	1.31326e+06	1.31936e+06	1.13663e+06	1.13395e+06	1066715	1.26431e+06	20.9119	20.6397	20.5786	20.833	20.3247	20.3314	20.1163	20.1129	20.0247	20.2699	23	23	23	24	21	20	22	22	23	24	24	23	24	24	24	24	24	24	24	24	24
>ENSSSCP00000024610	5	0.693176	0.00821435	GFM1	none	G elongation factor, mitochondrial 1 [Source:HGNC Symbol;Acc:13780]|13|ENSSSCG00000025651|ENSSSCT00000028063	51699.7	46957.2	49509.1	55866.3	54466.3	35837	43961.2	23362.2	42762.3	37814.9	35482.7	31638.6	15.5191	15.5954	15.7697	15.7331	15.4239	14.5119	15.3841	15.2067	15.1148	14.9494	3	4	4	4	1	3	2	1	3	5	3	2	5	5	5	5	5	5	5	5	5
>ENSSSCP00000007105	6	0.693292	0.00690057	OTUD7B	none	OTU domain containing 7B [Source:HGNC Symbol;Acc:16683]|4|ENSSSCG00000006663|ENSSSCT00000007300	73924.8	64254.7	88468.9	71932.8	71042.6	51251.5	56905.4	35892.6	53748.5	54777.6	60604.3	45580.4	15.9715	16.4329	16.1344	16.1164	15.7963	15.1314	15.7139	15.7413	15.8871	15.4761	5	8	6	5	1	3	4	1	2	8	5	4	6	6	6	6	6	6	6	6	6
>ENSSSCP00000000856	5	0.696366	0.00304	ANO6	none	anoctamin 6 [Source:HGNC Symbol;Acc:25240]|5|ENSSSCG00000000804|ENSSSCT00000000873	88394.7	88043	79232.6	88350.5	97952.6	61555	61075.3	43496.3	76239.9	64844.4	60646.2	63028.1	16.4259	16.2738	16.431	16.5798	15.8983	15.4086	16.2183	15.9847	15.8881	15.9437	3	1	2	3	0	2	3	2	2	4	4	3	5	5	5	5	5	5	5	5	5
>ENSSSCP00000002082	2	0.696422	0.000617977	EDC3	none	enhancer of mRNA decapping 3 [Source:HGNC Symbol;Acc:26114]|7|ENSSSCG00000001903|ENSSSCT00000002132	23812.7	22426.3	23463.2	25868.1	23493.1	16583.7	16215.2	14943.9	20394.2	17470.3	13592	16886.4	14.4529	14.5181	14.6589	14.52	13.9851	13.8673	14.3159	14.0926	13.7305	14.0436	3	2	3	2	1	2	2	1	2	2	2	1	2	2	2	2	2	2	2	2	2
>ENSSSCP00000024730	2	0.69692	0.0132826	RBM22	none	RNA binding motif protein 22 [Source:HGNC Symbol;Acc:25503]|GL895674.1|ENSSSCG00000023231|ENSSSCT00000022932	14753.9	15463.9	13257.1	16515.4	13779.1	10282.3	13556.3	12755.9	10701.6	7097.47	9685.74	7896.65	13.9166	13.6945	14.0115	13.7502	13.7267	13.6389	13.3855	12.7931	13.2416	12.947	1	2	1	2	0	1	2	2	2	0	2	1	2	2	2	2	2	2	2	2	2
>ENSSSCP00000007489	8	0.699246	3.97132e-05	SLC20A2	none	solute carrier family 20 (phosphate transporter), member 2 [Source:HGNC Symbol;Acc:10947]|17|ENSSSCG00000007027|ENSSSCT00000007696	182583	176875	184079	174084	195295	127671	132722	108300	124280	127359	138423	134939	17.4324	17.49	17.4094	17.5753	17.018	16.7247	16.9232	16.9585	17.0787	17.042	7	7	7	7	6	5	7	5	7	8	8	7	8	8	8	8	8	8	8	8	8
>ENSSSCP00000008695	2	0.700242	0.00103448	NCK2	none	Sus scrofa NCK adaptor protein 2 (NCK2), mRNA. [Source:RefSeq mRNA;Acc:NM_001137631]|3|ENSSSCG00000008144|ENSSSCT00000008921	39607.6	35879.4	42224.2	43702.6	36624.1	27734.9	26068.9	23517.1	31370	27021.7	27994.4	30437.3	15.1309	15.3658	15.4154	15.1605	14.67	14.5214	14.9371	14.7218	14.7728	14.8936	2	2	2	2	1	2	2	2	2	2	2	2	2	2	2	2	2	2	2	2	2
>ENSSSCP00000021526	3	0.701351	0.00882053	CYP1B1	none	Uncharacterized protein [Source:UniProtKB/TrEMBL;Acc:I3LBV4]|GL893411.2|ENSSSCG00000030456|ENSSSCT00000025308	52182.9	60143.4	46396	45308.4	56884	36598.6	42735.4	34878.3	33982.9	34626.4	38464.6	34903.9	15.8761	15.5017	15.4675	15.7957	15.3831	15.09	15.0525	15.0796	15.2312	15.0911	3	4	4	4	4	4	3	3	3	4	5	3	3	3	3	3	3	3	3	3	3
>ENSSSCP00000020641	5	0.702698	0.0172472	SON	none	SON DNA binding protein [Source:HGNC Symbol;Acc:11183]|13|ENSSSCG00000023674|ENSSSCT00000026483	69420.6	64650.7	67633.6	76777.9	68620.1	48781.7	47008	68094	30786.4	45760	58152.9	42889.1	15.9804	16.0455	16.2284	16.0663	15.5206	16.0552	14.91	15.4818	15.8276	15.3883	3	6	7	4	1	3	3	5	3	4	4	5	5	5	5	5	5	5	5	5	5
>ENSSSCP00000012224	30	0.70306	1.39058e-05	FLNB	none	filamin B, beta [Source:HGNC Symbol;Acc:3755]|13|ENSSSCG00000011471|ENSSSCT00000012553	6.25679e+06	6.47028e+06	6.03205e+06	6.3812e+06	6.14364e+06	4.3989e+06	4364305	4556841	4.8749e+06	3.9702e+06	4.10559e+06	4521561	22.6254	22.5242	22.6054	22.5507	22.0573	22.1196	22.2169	21.9208	21.9692	22.1084	30	30	30	30	28	28	28	29	30	30	30	29	30	30	30	30	30	30	30	30	30
>ENSSSCP00000006776	3	0.707875	0.00898804	FCER1G	none	Sus scrofa Fc fragment of IgE, high affinity I, receptor for; gamma polypeptide (FCER1G), mRNA. [Source:RefSeq mRNA;Acc:NM_001001265]|4|ENSSSCG00000006357|ENSSSCT00000006966	75615.5	72574	75212.6	78302.4	76373.2	53526.4	70867.7	38385.6	59844.3	53401.4	54850.4	43809	16.1472	16.1987	16.2568	16.2208	16.1128	15.2283	15.8689	15.7046	15.7432	15.4189	2	2	2	2	2	2	2	2	2	2	2	2	3	3	3	3	3	3	3	3	3
>ENSSSCP00000003949	2	0.708307	0.0268825	FHL3	none	Sus scrofa four and a half LIM domains 3 (FHL3), mRNA. [Source:RefSeq mRNA;Acc:NM_213946]|6|ENSSSCG00000003644|ENSSSCT00000004040	46887.1	45438.9	46131.2	54310.6	41667.8	33210.5	20741.5	44643.8	26489.1	28407.6	42243.9	36736.9	15.4716	15.4935	15.7289	15.3466	14.3402	15.4462	14.6931	14.794	15.3665	15.1649	3	2	2	2	1	1	1	3	1	2	1	1	2	2	2	2	2	2	2	2	2
>ENSSSCP00000017009	8	0.709094	0.000318409	GLS	none	glutaminase [Source:HGNC Symbol;Acc:4331]|15|ENSSSCG00000016056|ENSSSCT00000017481	240965	223050	249481	229252	262076	170867	174314	151609	178122	168106	170765	182284	17.767	17.9286	17.8066	17.9996	17.4113	17.21	17.4425	17.359	17.3817	17.4758	8	8	8	10	8	6	7	7	7	9	9	7	8	8	8	8	8	8	8	8	8
>ENSSSCP00000024864	9	0.709317	0.0298263	CSRP1	none	cysteine and glycine-rich protein 1 [Source:HGNC Symbol;Acc:2469]|10|ENSSSCG00000020976|ENSSSCT00000026397	3.53797e+06	3.58878e+06	2915660	4.25348e+06	3393972	2.50955e+06	1.4917e+06	3387049	2.78344e+06	2.26639e+06	2.7482e+06	2.3805e+06	21.7751	21.4754	22.0202	21.6945	20.5085	21.6916	21.4084	21.112	21.3901	21.1828	9	9	9	9	9	9	8	9	9	9	9	9	9	9	9	9	9	9	9	9	9
>ENSSSCP00000003299	17	0.712228	0.000996348	ATP1A3	none	ATPase, Na+/K+ transporting, alpha 3 polypeptide [Source:HGNC Symbol;Acc:801]|6|ENSSSCG00000003045|ENSSSCT00000003382	508032	557569	465754	517390	491415	361835	428068	421783	357722	318207	325525	319704	19.0888	18.8292	18.9809	18.9066	18.7075	18.6861	18.4485	18.2796	18.3124	18.2864	5	11	10	8	4	5	9	8	10	16	13	10	17	17	17	17	17	17	17	17	17
>ENSSSCP00000024437	2	0.714614	0.00710262	B3GAT3	none	beta-1,3-glucuronyltransferase 3 (glucuronosyltransferase I) [Source:HGNC Symbol;Acc:923]|2|ENSSSCG00000020809|ENSSSCT00000023287	35045	34878.3	36553.2	35127.8	33620.9	25043.7	29972.5	22196.5	19747.8	29362	19895	29088.3	15.09	15.1577	15.1003	15.0371	14.8714	14.438	14.2694	14.8417	14.2801	14.8282	1	2	1	1	0	0	2	1	1	2	0	1	2	2	2	2	2	2	2	2	2
>ENSSSCP00000026961	5	0.715186	0.00698273	KPNA2	none	karyopherin alpha 2 (RAG cohort 1, importin alpha 1) [Source:HGNC Symbol;Acc:6395]|GL895745.1|ENSSSCG00000029005|ENSSSCT00000022690	220300	258169	190138	203585	229307	157555	171376	160221	172375	124459	144535	172365	17.978	17.5367	17.6353	17.8069	17.3868	17.2897	17.3952	16.9253	17.1411	17.3951	4	4	5	4	3	4	4	4	4	4	4	3	5	5	5	5	5	5	5	5	5
>ENSSSCP00000004929	11	0.715632	0.000979802	TPM1	none	Sus scrofa tropomyosin 1 (alpha) (TPM1), mRNA. [Source:RefSeq mRNA;Acc:NM_001097483]|1|ENSSSCG00000004570|ENSSSCT00000005049	8.92659e+06	9506474	8851798	7822794	9525301	6.38815e+06	5.54074e+06	6.87424e+06	6.07033e+06	5.92081e+06	7.03593e+06	6.88687e+06	23.1805	23.0775	22.8993	23.1833	22.4016	22.7128	22.5333	22.4974	22.7463	22.7154	10	11	11	11	10	10	10	10	11	11	11	11	11	11	11	11	11	11	11	11	11
>ENSSSCP00000016314	3	0.716289	0.027402	TRA2A	none	Sus scrofa transformer 2 alpha homolog (Drosophila) (TRA2A), mRNA. [Source:RefSeq mRNA;Acc:NM_001077223]|9|ENSSSCG00000015387|ENSSSCT00000016762	112576	144035	96347.9	110246	99673.6	80636.8	92728.8	86265	85397.3	68847.6	71924.3	78657.5	17.1361	16.556	16.7504	16.6049	16.5007	16.3965	16.3819	16.0711	16.1342	16.2633	2	3	3	2	2	2	2	2	3	3	2	2	3	3	3	3	3	3	3	3	3
>ENSSSCP00000016412	16	0.716918	2.60238e-05	PRRC2C	none	proline-rich coiled-coil 2C [Source:HGNC Symbol;Acc:24903]|9|ENSSSCG00000015480|ENSSSCT00000016863	245659	228354	247517	252952	253814	176118	166054	174793	183911	168517	175338	188092	17.8009	17.9172	17.9485	17.9534	17.3413	17.4153	17.4887	17.3625	17.4198	17.5211	11	13	13	12	5	8	8	9	11	14	15	11	16	16	16	16	16	16	16	16	16
>ENSSSCP00000003942	6	0.717026	0.00079893	MAP7D1	none	Uncharacterized protein [Source:UniProtKB/TrEMBL;Acc:F1SV46]|6|ENSSSCG00000003637|ENSSSCT00000004033	162258	150287	173909	151134	173703	116343	125252	110271	122993	106790	119214	113541	17.1974	17.408	17.2055	17.4063	16.9345	16.7507	16.9082	16.7044	16.8632	16.7929	11	12	14	14	6	10	8	8	13	14	15	11	6	6	6	6	6	6	6	6	6
>ENSSSCP00000021626	2	0.717512	0.000294428	CNOT4	none	Uncharacterized protein [Source:UniProtKB/TrEMBL;Acc:I3LC53]|18|ENSSSCG00000021354|ENSSSCT00000029334	89702	88072.2	85932.5	99917	84886.2	64362.2	57251.2	67108.2	67288.1	62859.5	72056.8	59609.6	16.4264	16.3909	16.6084	16.3732	15.805	16.0342	16.0381	15.9398	16.1368	15.8633	2	1	1	1	0	0	0	2	1	2	1	2	2	2	2	2	2	2	2	2	2
>ENSSSCP00000015070	3	0.720125	0.00890379	CAST	none	Sus scrofa calpastatin (CAST), mRNA. [Source:RefSeq mRNA;Acc:NM_214067]|2|ENSSSCG00000014170|ENSSSCT00000015480	115991	126623	95698.9	112197	129446	83528.2	89337.5	101026	78605.3	69653.4	72190.5	90356.3	16.9502	16.5462	16.7757	16.982	16.447	16.6244	16.2623	16.0879	16.1395	16.4633	21	26	24	23	16	18	20	21	23	22	24	23	3	3	3	3	3	3	3	3	3
>ENSSSCP00000003413	19	0.721753	0.000213486	NUCB1	none	nucleobindin 1 [Source:HGNC Symbol;Acc:8043]|6|ENSSSCG00000003150|ENSSSCT00000003496	989264	899397	1.06108e+06	982094	1.01449e+06	714005	614657	722892	744736	771938	738072	691732	19.7786	20.0171	19.9055	19.9523	19.2294	19.4634	19.5064	19.5581	19.4934	19.3999	14	18	17	18	8	12	16	17	16	19	18	17	19	19	19	19	19	19	19	19	19
>ENSSSCP00000016670	4	0.722749	0.00204338	NIFK	none	nucleolar protein interacting with the FHA domain of MKI67 [Source:HGNC Symbol;Acc:17838]|15|ENSSSCG00000015730|ENSSSCT00000017130	57884.2	56089.7	60211.9	59169.8	56065.3	41835.8	54083	39901.5	39691.9	34213.5	41681.7	41443	15.7754	15.8778	15.8526	15.7748	15.7229	15.2842	15.2766	15.0623	15.3471	15.3388	7	8	8	9	1	3	7	5	1	3	5	4	4	4	4	4	4	4	4	4	4
>ENSSSCP00000027080	5	0.726599	0.000720491	POLR2E	none	polymerase (RNA) II (DNA directed) polypeptide E, 25kDa [Source:HGNC Symbol;Acc:9192]|2|ENSSSCG00000021472|ENSSSCT00000023998	102512	97232.4	97188.8	113572	102054	74484.9	68165.2	87143.9	83642.3	65132.2	74358.4	68467.6	16.5692	16.5685	16.7932	16.639	16.0567	16.4111	16.3519	15.9911	16.1822	16.0631	4	3	4	3	2	3	4	3	3	3	5	3	5	5	5	5	5	5	5	5	5
>ENSSSCP00000018843	6	0.726613	0.000558153	NUFIP2	none	nuclear fragile X mental retardation protein interacting protein 2 [Source:HGNC Symbol;Acc:17634]|12|ENSSSCG00000017785|ENSSSCT00000019357	56335.4	52468.9	58407.7	53368.2	61096.8	40934	39232.5	40416.1	37728.7	43081.4	43246.5	41899.1	15.6792	15.8339	15.7037	15.8988	15.2598	15.3026	15.2034	15.3948	15.4003	15.3546	5	6	5	4	2	2	1	3	2	3	3	3	6	6	6	6	6	6	6	6	6
>ENSSSCP00000017353	43	0.726832	4.05389e-08	HDLBP	none	high density lipoprotein binding protein [Source:HGNC Symbol;Acc:4857]|15|ENSSSCG00000016379|ENSSSCT00000017834	3.16657e+06	3.10551e+06	3.2491e+06	3.1516e+06	3.16005e+06	2.30156e+06	2.34232e+06	2.24486e+06	2.41148e+06	2.23267e+06	2.33543e+06	2.24263e+06	21.5664	21.6316	21.5877	21.5915	21.1595	21.0982	21.2015	21.0903	21.1553	21.0968	41	42	40	43	27	35	35	37	34	40	40	38	43	43	43	43	43	43	43	43	43
>ENSSSCP00000016168	4	0.727255	0.0244872	APLP2	none	Uncharacterized protein [Source:UniProtKB/TrEMBL;Acc:F1S6E8]|9|ENSSSCG00000015244|ENSSSCT00000016613	93382.8	113929	94036.5	75060.1	90505.2	67913.1	80418.9	71216.6	70055.4	59435.1	57455.1	68897.2	16.7978	16.5209	16.1958	16.4657	16.2952	16.1199	16.0962	15.859	15.8101	16.0722	3	4	2	3	2	2	3	2	2	4	2	2	4	4	4	4	4	4	4	4	4
>ENSSSCP00000003965	10	0.728126	0.000841339	PABPC4	none	poly(A) binding protein, cytoplasmic 4 (inducible form) [Source:HGNC Symbol;Acc:8557]|6|ENSSSCG00000003660|ENSSSCT00000004056	558705	573027	514467	608155	539171	406808	415936	415349	420390	375494	393889	419788	19.1282	18.9727	19.2141	19.0404	18.666	18.664	18.6814	18.5184	18.5874	18.6793	8	9	9	8	8	8	9	8	10	10	10	9	10	10	10	10	10	10	10	10	10
>ENSSSCP00000019639	6	0.728345	0.0120409	EBNA1BP2	none	EBNA1 binding protein 2 [Source:HGNC Symbol;Acc:15531]|6|ENSSSCG00000030177|ENSSSCT00000022964	85335.3	88076.9	88541.3	85720.1	79003	62153.6	70133.7	68881.8	82784	47935.3	52077.9	51108.8	16.4265	16.4341	16.3873	16.2696	16.0978	16.0718	16.3371	15.5488	15.6684	15.6413	5	4	5	5	2	4	2	3	2	3	3	3	6	6	6	6	6	6	6	6	6
>ENSSSCP00000001497	4	0.728826	0.00174045	AIF1	none	Sus scrofa allograft inflammatory factor 1 (AIF1), mRNA. [Source:RefSeq mRNA;Acc:NM_001129950]|7|ENSSSCG00000001408|ENSSSCT00000001539	55785.9	51347.1	57236.2	61740.3	52819.8	40658.2	39858	34349.9	51091.3	39983.6	42215.7	36450.7	15.648	15.8046	15.9139	15.6888	15.2826	15.068	15.6408	15.2871	15.3655	15.1537	4	4	2	3	2	2	4	2	4	2	2	3	4	4	4	4	4	4	4	4	4
>ENSSSCP00000012459	20	0.728923	6.74288e-05	PLOD2	ECM Regulators	procollagen-lysine, 2-oxoglutarate 5-dioxygenase 2 [Source:HGNC Symbol;Acc:9082]|13|ENSSSCG00000011689|ENSSSCT00000012797	1.25718e+06	1.2649e+06	1.20872e+06	1.30826e+06	1246861	916390	908947	826084	923917	861236	922056	1.0561e+06	20.2706	20.2051	20.3192	20.2499	19.7938	19.6559	19.8174	19.716	19.8145	20.0103	18	20	15	17	12	11	12	15	13	17	16	16	20	20	20	20	20	20	20	20	20
>ENSSSCP00000008687	21	0.729062	0.00318566	RANBP2	none	RAN binding protein 2 [Source:HGNC Symbol;Acc:9848]|3|ENSSSCG00000008136|ENSSSCT00000008913	573823	512978	568109	627305	586898	418352	480402	492592	444621	401032	335076	356391	18.9685	19.1158	19.2588	19.1628	18.8739	18.91	18.7622	18.6134	18.3541	18.4431	11	18	12	16	1	3	12	13	11	16	17	12	21	21	21	21	21	21	21	21	21
>ENSSSCP00000008518	4	0.729284	0.0148035	LUC7L	none	LUC7-like (S. cerevisiae) [Source:HGNC Symbol;Acc:6723]|3|ENSSSCG00000007979|ENSSSCT00000008742	40337.1	45049.7	37392.6	44997.5	33908.5	29417.2	24474.5	29429.5	30093.9	29964.9	39251.3	23288.9	15.4592	15.1905	15.4576	15.0494	14.579	14.845	14.8772	14.871	15.2605	14.5074	5	6	10	5	3	4	5	4	9	9	7	6	4	4	4	4	4	4	4	4	4
>ENSSSCP00000013846	10	0.731441	0.000302457	SF1	none	splicing factor 1 [Source:HGNC Symbol;Acc:12950]|2|ENSSSCG00000013021|ENSSSCT00000014232	489071	471193	475873	496436	512781	357726	291719	370207	396591	371595	356000	360247	18.846	18.8602	18.9212	18.968	18.1542	18.498	18.5973	18.5034	18.4415	18.4586	8	9	9	8	5	6	5	9	7	9	9	8	10	10	10	10	10	10	10	10	10
>ENSSSCP00000022947	8	0.731499	0.000596169	YBX1	none	Y box binding protein 1 [Source:HGNC Symbol;Acc:8014]|6|ENSSSCG00000028485|ENSSSCT00000026666	4.96735e+06	5254680	5.22397e+06	4454187	4936571	3633611	3.37717e+06	4.23529e+06	3.18912e+06	3834283	3.43233e+06	3.73347e+06	22.3252	22.3167	22.0867	22.2351	21.6874	22.014	21.6047	21.8705	21.7108	21.8321	11	11	11	11	11	11	11	11	11	11	11	11	8	8	8	8	8	8	8	8	8
>ENSSSCP00000026458	3	0.732653	0.00479356	RRP9	none	ribosomal RNA processing 9, small subunit (SSU) processome component, homolog (yeast) [Source:HGNC Symbol;Acc:16829]|13|ENSSSCG00000023177|ENSSSCT00000032341	16896	16891	17934.4	15639.2	17119.5	12378.9	14057	15073.8	10291.6	9806.44	13372.7	11671.8	14.044	14.1304	13.9329	14.0634	13.779	13.8798	13.3292	13.2595	13.707	13.5107	2	3	2	2	1	2	1	2	1	2	3	2	3	3	3	3	3	3	3	3	3
>ENSSSCP00000025443	3	0.73338	0.000278055	KALRN	none	Uncharacterized protein [Source:UniProtKB/TrEMBL;Acc:I3LMX1]|16|ENSSSCG00000028803|ENSSSCT00000031572	23430	23839.6	21756.5	22600.4	25523.5	17183.1	19474.6	16258.2	16579.3	17886.9	15497.6	17402.1	14.5411	14.4092	14.4641	14.6395	14.2493	13.9889	14.0171	14.1266	13.9198	14.087	3	2	1	2	0	1	1	2	2	3	2	3	3	3	3	3	3	3	3	3	3
>ENSSSCP00000002510	4	0.735302	0.000144884	SRSF5	none	serine/arginine-rich splicing factor 5 [Source:HGNC Symbol;Acc:10787]|GL892783.2|ENSSSCG00000002312|ENSSSCT00000002574	125259	124221	121774	123309	131733	92103.3	94503.8	84294.5	106510	93755.2	90891	82665	16.9225	16.8938	16.9119	17.0073	16.5281	16.3632	16.7006	16.5166	16.4719	16.335	4	4	4	4	2	3	4	4	4	4	4	4	4	4	4	4	4	4	4	4	4
>ENSSSCP00000000642	2	0.735367	0.0020827	WBP11	none	WW domain binding protein 11 [Source:HGNC Symbol;Acc:16461]|5|ENSSSCG00000000611|ENSSSCT00000000657	35858.3	37928.4	34699.6	34692.4	36112.8	26369	22447.7	31399.7	28953.7	22209.1	28351.9	24852	15.211	15.0826	15.0823	15.1402	14.4543	14.9385	14.8215	14.4389	14.7912	14.6011	0	0	1	1	0	0	0	0	1	1	1	1	2	2	2	2	2	2	2	2	2
>ENSSSCP00000013647	5	0.736417	0.0038341	CHID1	none	chitinase domain containing 1 [Source:HGNC Symbol;Acc:28474]|2|ENSSSCG00000012837|ENSSSCT00000014032	103618	116589	106596	96266.4	95021.8	76306.4	80526.8	72525	78235.4	74137.8	71883.4	80529.6	16.8311	16.7018	16.5547	16.536	16.2972	16.1462	16.2555	16.1779	16.1334	16.2972	2	3	2	3	2	1	5	2	4	5	4	5	5	5	5	5	5	5	5	5	5
>ENSSSCP00000023066	15	0.736952	0.000768577	RSL1D1	none	ribosomal L1 domain containing 1 [Source:HGNC Symbol;Acc:24534]|GL893953.2|ENSSSCG00000023984|ENSSSCT00000023591	664025	726486	633911	622539	673164	489354	552035	529362	464804	397630	502076	490220	19.4706	19.2739	19.2478	19.3606	19.0744	19.0139	18.8263	18.6011	18.9375	18.9031	13	16	11	13	11	9	10	11	12	10	13	11	15	15	15	15	15	15	15	15	15
>ENSSSCP00000014590	19	0.737571	0.00917117	MAN2A2	none	Lysosomal alpha-mannosidase; Uncharacterized protein [Source:UniProtKB/TrEMBL;Acc:F1SEY1]|2|ENSSSCG00000013720|ENSSSCT00000014994	806905	767611	697313	949460	813237	595150	495568	547342	634051	640248	648157	605533	19.55	19.4114	19.8567	19.6333	18.9187	19.0621	19.2742	19.2883	19.306	19.2078	15	18	19	18	11	12	12	16	14	19	21	13	19	19	19	19	19	19	19	19	19
>ENSSSCP00000026706	5	0.737572	1.10515e-05	NCL	none	Uncharacterized protein [Source:UniProtKB/TrEMBL;Acc:I3LRH2]|GL895502.2|ENSSSCG00000029732|ENSSSCT00000032422	2.32034e+06	2.31172e+06	2.25795e+06	2292854	2.41883e+06	1.71141e+06	1731854	1.75439e+06	1.85437e+06	1.54201e+06	1645018	1.74084e+06	21.1405	21.1066	21.1287	21.2059	20.7239	20.7425	20.8225	20.5564	20.6497	20.7314	21	21	21	21	21	21	20	21	21	22	22	21	5	5	5	5	5	5	5	5	5
>ENSSSCP00000016135	11	0.739408	0.00467761	STT3A	none	STT3A, subunit of the oligosaccharyltransferase complex (catalytic) [Source:HGNC Symbol;Acc:6172]|9|ENSSSCG00000015214|ENSSSCT00000016580	487004	531112	433360	452712	530830	360094	405516	371774	350313	331655	339574	361732	19.0187	18.7252	18.7882	19.0179	18.6294	18.5041	18.4183	18.3393	18.3734	18.4646	9	10	8	10	6	8	8	7	8	8	9	9	11	11	11	11	11	11	11	11	11
>ENSSSCP00000017338	4	0.74044	0.000909486	GPC1	ECM-affiliated Proteins	glypican 1 [Source:HGNC Symbol;Acc:4449]|15|ENSSSCG00000016364|ENSSSCT00000017819	72108.9	65844.2	76224.5	74637.7	71729	53392.3	47018.4	63743	52391	53396.8	46380	57424.3	16.0068	16.218	16.1876	16.1303	15.5209	15.96	15.677	15.7045	15.5012	15.8094	1	4	2	4	1	0	1	1	1	2	1	0	4	4	4	4	4	4	4	4	4
>ENSSSCP00000023781	7	0.741101	0.00481026	RPL23	none	Sus scrofa ribosomal protein L23 (RPL23), mRNA. [Source:RefSeq mRNA;Acc:NM_001129955]|GL896426.1|ENSSSCG00000021590|ENSSSCT00000030349	1.68519e+06	1575724	1.69982e+06	1.94845e+06	1.51675e+06	1.24889e+06	1.25068e+06	1.42586e+06	1.34216e+06	1.20808e+06	1.11098e+06	1.1556e+06	20.5876	20.697	20.8939	20.5325	20.2543	20.4434	20.3561	20.2043	20.0834	20.1402	7	7	7	7	7	7	7	7	7	7	7	7	7	7	7	7	7	7	7	7	7
>ENSSSCP00000009752	2	0.741565	0.000246655	OSTC	none	oligosaccharyltransferase complex subunit (non-catalytic) [Source:HGNC Symbol;Acc:24448]|8|ENSSSCG00000009145|ENSSSCT00000010014	121673	127365	111668	119425	128236	90228.7	103165	81494.2	88219.4	91963.3	92180.7	84349.8	16.9586	16.7689	16.8657	16.9684	16.6546	16.3144	16.4288	16.4888	16.4922	16.3641	2	2	2	2	2	2	2	2	2	2	2	1	2	2	2	2	2	2	2	2	2
>ENSSSCP00000001854	34	0.74209	2.23368e-05	HSP90AB1	none	Sus scrofa heat shock 90kD protein 1, beta (HSPCB), mRNA. [Source:RefSeq mRNA;Acc:NM_001244433]|7|ENSSSCG00000001701|ENSSSCT00000001901	3.37579e+07	35572060	32966144	32273258	34220312	25051424	25818158	26097420	24642314	23481540	24447856	25821256	25.0842	24.9745	24.9438	25.0283	24.6219	24.6374	24.5546	24.485	24.5432	24.6221	37	36	36	36	34	35	32	33	35	35	36	35	34	34	34	34	34	34	34	34	34
>ENSSSCP00000027676	5	0.743692	0.0497593	SLC30A1	none	Sus scrofa solute carrier family 30 (zinc transporter), member 1 (SLC30A1), mRNA. [Source:RefSeq mRNA;Acc:NM_001139470]|9|ENSSSCG00000024509|ENSSSCT00000024989	137559	180403	127968	116610	125255	102302	106246	106127	97859	87265.1	86341.6	129971	17.4609	16.9654	16.8313	16.9345	16.697	16.6954	16.5784	16.4131	16.3978	16.9878	3	5	5	4	2	2	4	3	4	4	4	2	5	5	5	5	5	5	5	5	5
>ENSSSCP00000003789	2	0.743695	0.0190546	MRTO4	none	mRNA turnover 4 homolog (S. cerevisiae) [Source:HGNC Symbol;Acc:18477]|6|ENSSSCG00000003490|ENSSSCT00000003877	48066.5	56750.6	39588.6	46696.7	49230.2	35746.8	41792.3	32750.9	38226.4	31849.4	36722.7	33139.4	15.7923	15.2728	15.511	15.5873	15.3509	14.9992	15.2223	14.959	15.1644	15.0163	0	1	2	0	0	1	1	1	1	0	1	2	2	2	2	2	2	2	2	2	2
>ENSSSCP00000014461	3	0.74447	0.00491727	HNRNPA2B1	none	Uncharacterized protein [Source:UniProtKB/TrEMBL;Acc:F1SA35]|2|ENSSSCG00000013607|ENSSSCT00000014862	3.28309e+06	3237326	2.93361e+06	3.69485e+06	3.26657e+06	2.44416e+06	1.98878e+06	2.91009e+06	2512971	2.2754e+06	2.83427e+06	2.14345e+06	21.6264	21.4842	21.8171	21.6393	20.9235	21.4726	21.261	21.1177	21.4345	21.0315	3	3	3	3	3	3	3	3	3	3	3	3	3	3	3	3	3	3	3	3	3
>ENSSSCP00000015185	10	0.744573	0.0436542	PDLIM4	none	PDZ and LIM domain 4 [Source:HGNC Symbol;Acc:16501]|2|ENSSSCG00000014274|ENSSSCT00000015597	863043	853334	733728	995820	869289	642598	372897	850945	608030	610970	751297	661449	19.7028	19.4849	19.9255	19.7295	18.5084	19.6987	19.2138	19.2207	19.519	19.3353	10	9	10	9	6	8	9	11	10	11	10	10	10	10	10	10	10	10	10	10	10
>ENSSSCP00000013903	6	0.745166	0.00740946	FADS2	none	fatty acid desaturase 2 [Source:HGNC Symbol;Acc:3575]|2|ENSSSCG00000013072|ENSSSCT00000014289	162568	186307	151313	145395	167255	121140	128758	114602	131224	120046	120373	111836	17.5073	17.2072	17.1496	17.3517	16.9743	16.8063	17.0017	16.8732	16.8772	16.771	3	5	5	5	3	3	6	3	4	5	6	5	6	6	6	6	6	6	6	6	6
>ENSSSCP00000007842	3	0.745878	0.00321487	SRSF6	none	Sus scrofa serine/arginine-rich splicing factor 6 (SRSF6), mRNA. [Source:RefSeq mRNA;Acc:NM_001077217]|17|ENSSSCG00000007362|ENSSSCT00000008057	418614	457190	382630	412009	422626	312235	363612	362053	330647	282682	255223	279191	18.8024	18.5456	18.6523	18.689	18.472	18.4658	18.3349	18.1088	17.9614	18.0909	3	3	3	3	3	3	3	3	3	3	3	3	3	3	3	3	3	3	3	3	3
>ENSSSCP00000017776	5	0.746547	0.00542562	TRIO	none	Uncharacterized protein [Source:UniProtKB/TrEMBL;Acc:F1SRN4]|16|ENSSSCG00000016781|ENSSSCT00000018268	40159.3	35490.1	39784.1	40838.3	44524.7	29980.8	34342.3	22262.1	28083.6	32634.6	31598.7	30963.4	15.1151	15.2799	15.3176	15.4423	15.0677	14.4423	14.7774	14.9941	14.9476	14.9183	2	5	4	4	1	2	3	2	4	5	4	3	5	5	5	5	5	5	5	5	5
>ENSSSCP00000010743	2	0.746882	0.020214	SMARCB1	none	SWI/SNF related, matrix associated, actin dependent regulator of chromatin, subfamily b, member 1 [Source:HGNC Symbol;Acc:11103]|14|ENSSSCG00000010070|ENSSSCT00000011031	31666.8	29055.3	28335.7	36438.8	32837.4	23651.4	23405.4	23790.7	30152.6	17421.4	28201.3	18936.7	14.8265	14.7903	15.1532	15.0031	14.5146	14.5381	14.88	14.0886	14.7835	14.2089	0	1	1	1	1	0	0	0	2	0	1	0	2	2	2	2	2	2	2	2	2
>ENSSSCP00000000149	86	0.747372	0.00366809	MYH9	none	myosin, heavy chain 9, non-muscle [Source:HGNC Symbol;Acc:7579]|5|ENSSSCG00000000145|ENSSSCT00000000151	66615159	74395296	65113836	58312440	68639064	4.97863e+07	52660564	50573104	42190528	45143280	50407216	57743188	26.1487	25.9565	25.7973	26.0325	25.6502	25.5919	25.3304	25.428	25.5871	25.7831	86	92	89	90	84	83	86	84	86	89	89	87	86	86	86	86	86	86	86	86	86
>ENSSSCP00000010548	11	0.747473	0.0100393	OAS2	none	2'-5'-oligoadenylate synthetase 2, 69/71kDa [Source:HGNC Symbol;Acc:8087]|14|ENSSSCG00000009881|ENSSSCT00000010831	317857	326363	301169	274320	369577	237589	225751	197819	261099	257829	250785	232254	18.3161	18.2002	18.0655	18.4955	17.7844	17.5938	17.9942	17.9761	17.9361	17.8253	7	8	6	9	5	6	5	5	8	9	8	7	11	11	11	11	11	11	11	11	11
>ENSSSCP00000017421	4	0.748677	0.00794377	ABCF2	none	Uncharacterized protein [Source:UniProtKB/TrEMBL;Acc:F1SSL4]|18|ENSSSCG00000016441|ENSSSCT00000017902	33157.5	34406.6	27923	34816.4	35484	24824.2	25124.1	23614.8	25382.8	23858.2	23205.8	27759.8	15.0704	14.7692	15.0875	15.1149	14.6168	14.5274	14.6316	14.5422	14.5022	14.7607	3	5	2	2	1	2	2	2	2	3	2	3	4	4	4	4	4	4	4	4	4
>ENSSSCP00000003814	8	0.749582	0.0113599	HSPG2	Proteoglycans	Uncharacterized protein [Source:UniProtKB/TrEMBL;Acc:F1SU03]|6|ENSSSCG00000003514|ENSSSCT00000003904	188315	208028	181295	199292	164645	141158	106724	178578	149576	131881	124267	155921	17.6664	17.468	17.6045	17.329	16.7035	17.4462	17.1905	17.0089	16.9231	17.2505	10	14	14	7	4	4	0	1	2	1	1	2	8	8	8	8	8	8	8	8	8
>ENSSSCP00000025692	2	0.749728	0.0334098	BCAR1	none	breast cancer anti-estrogen resistance 1 [Source:HGNC Symbol;Acc:971]|6|ENSSSCG00000028878|ENSSSCT00000022592	17254.5	13843.7	18376.9	20261.9	16535.7	12936.2	12969.1	12158	13313.6	12623.6	14740	11813	13.7569	14.1656	14.3065	14.0133	13.6628	13.5696	13.7006	13.6238	13.8475	13.5281	1	1	2	2	0	1	0	0	1	1	2	0	2	2	2	2	2	2	2	2	2
>ENSSSCP00000007089	8	0.750834	0.0481687	CTSS	ECM Regulators	cathepsin S [Source:HGNC Symbol;Acc:2545]|4|ENSSSCG00000006648|ENSSSCT00000007284	579631	504567	515771	719541	578647	435207	282813	501103	411287	541153	502842	372044	18.9447	18.9764	19.4567	19.1423	18.1095	18.9347	18.6498	19.0457	18.9397	18.5051	7	7	8	7	4	5	3	7	6	7	6	6	8	8	8	8	8	8	8	8	8
>ENSSSCP00000021354	6	0.751558	0.0081385	STK10	none	Uncharacterized protein [Source:UniProtKB/TrEMBL;Acc:I3LBD5]|16|ENSSSCG00000022478|ENSSSCT00000028793	76826.3	64167.3	80003.9	79577.9	83555.9	57739.4	53591.8	52389.5	59876.7	68911.5	57770.3	53896.3	15.9695	16.2878	16.2801	16.3505	15.7097	15.677	15.8697	16.0725	15.818	15.7179	2	6	5	3	2	3	5	2	4	5	6	6	6	6	6	6	6	6	6	6	6
>ENSSSCP00000024993	2	0.751709	0.0183561	PLA2G4A	none	phospholipase A2, group IVA (cytosolic, calcium-dependent) [Source:HGNC Symbol;Acc:9035]|9|ENSSSCG00000023351|ENSSSCT00000022784	55143.4	55828	51281.9	53181.8	60281.9	41451.8	45180.3	31495.3	51670.4	43536.6	30353.5	46474.7	15.7687	15.6462	15.6986	15.8794	15.4634	14.9428	15.657	15.4099	14.8896	15.5042	2	1	0	2	0	0	0	0	0	2	2	2	2	2	2	2	2	2	2	2	2
>ENSSSCP00000003432	12	0.75171	4.0562e-05	RPS11	none	Sus scrofa ribosomal protein S11 (RPS11), mRNA. [Source:RefSeq mRNA;Acc:NM_001244070]|6|ENSSSCG00000003165|ENSSSCT00000003515	1.59855e+06	1.68605e+06	1.50302e+06	1.59729e+06	1.60783e+06	1.20164e+06	1.26645e+06	1.18797e+06	1.30067e+06	1.20975e+06	1.12712e+06	1117899	20.6852	20.5194	20.6072	20.6167	20.2724	20.1801	20.3108	20.2063	20.1042	20.0924	11	12	11	12	10	11	11	10	12	12	11	11	12	12	12	12	12	12	12	12	12
>ENSSSCP00000011267	8	0.754801	0.0024333	NOLC1	none	nucleolar and coiled-body phosphoprotein 1 [Source:HGNC Symbol;Acc:15608]|14|ENSSSCG00000010576|ENSSSCT00000011569	221847	220520	203204	224639	239024	167450	171243	200930	174140	132881	157947	167559	17.7506	17.6326	17.7773	17.8668	17.3857	17.6163	17.4099	17.0198	17.2691	17.3543	5	7	4	8	2	4	5	4	4	4	6	4	8	8	8	8	8	8	8	8	8
>ENSSSCP00000012512	6	0.75519	0.0270419	GOLIM4	none	golgi integral membrane protein 4 [Source:HGNC Symbol;Acc:15448]|13|ENSSSCG00000011741|ENSSSCT00000012852	36843.5	43105.2	38805.6	35019.7	30443.5	27823.8	29100.1	30277.8	19948.5	30025.5	25214.1	32377.1	15.3956	15.244	15.0959	14.8938	14.8287	14.886	14.284	14.8739	14.6219	14.9827	1	7	4	3	0	1	3	2	4	5	3	2	6	6	6	6	6	6	6	6	6
>ENSSSCP00000015990	7	0.75613	0.011433	ZPR1	none	zinc finger protein 259 [Source:HGNC Symbol;Acc:13051]|9|ENSSSCG00000015066|ENSSSCT00000016432	153947	151433	151707	168614	144035	116404	112080	128728	134995	118609	124245	79768.1	17.2083	17.2109	17.3634	17.1361	16.7742	16.974	17.0425	16.8559	16.9228	16.2835	5	8	5	6	4	6	6	5	8	7	8	4	7	7	7	7	7	7	7	7	7
>ENSSSCP00000008954	4	0.757035	0.00145682	REL	none	v-rel avian reticuloendotheliosis viral oncogene homolog [Source:HGNC Symbol;Acc:9954]|3|ENSSSCG00000008388|ENSSSCT00000009185	64700.9	63782.4	60818.3	72695.1	61507.9	48980.9	47304.6	45850.7	56099.2	46533.9	47057.1	51039.9	15.9609	15.8922	16.1496	15.9085	15.5297	15.4847	15.7757	15.506	15.5221	15.6393	2	4	4	4	0	2	2	2	5	4	3	4	4	4	4	4	4	4	4	4	4
>ENSSSCP00000015997	21	0.757556	0.0389457	TAGLN	none	transgelin [Source:HGNC Symbol;Acc:11553]|9|ENSSSCG00000015073|ENSSSCT00000016439	46301747	50421536	39855392	47622760	47307300	3.50762e+07	23548646	47415552	27899546	32057376	42756808	36779108	25.5875	25.2483	25.5051	25.4956	24.4891	25.4989	24.7337	24.9342	25.3497	25.1324	21	21	21	21	20	19	20	20	20	21	21	21	21	21	21	21	21	21	21	21	21
>ENSSSCP00000014963	5	0.758158	0.00435394	BTF3	none	|2|ENSSSCG00000014071|ENSSSCT00000015371	1.00518e+06	885898	1.1001e+06	1.03678e+06	997951	762087	744275	812113	724604	745565	814722	731241	19.7568	20.0692	19.9837	19.9286	19.5055	19.6313	19.4668	19.508	19.6359	19.48	5	5	5	5	5	5	5	5	5	5	5	5	5	5	5	5	5	5	5	5	5
>ENSSSCP00000024482	5	0.758327	0.0266327	PFKP	none	phosphofructokinase, platelet [Source:HGNC Symbol;Acc:8878]|10|ENSSSCG00000011158|ENSSSCT00000027374	131437	150850	123992	112528	138376	99671.9	97650.4	86924.2	84472.5	88458.8	92099.6	148426	17.2028	16.9199	16.7799	17.0782	16.5753	16.4075	16.3662	16.4327	16.4909	17.1794	5	6	5	6	5	5	4	6	5	6	4	5	5	5	5	5	5	5	5	5	5
>ENSSSCP00000001622	3	0.759541	0.0182865	BAG2	none	Uncharacterized protein [Source:UniProtKB/TrEMBL;Acc:F1RZV1]|7|ENSSSCG00000001494|ENSSSCT00000001666	23827.6	22066	25688.9	24998.2	22557.3	18098	12693.9	23425.6	20015.9	16341	19353.7	16758.2	14.4295	14.6489	14.6095	14.4613	13.6318	14.5158	14.2889	13.9962	14.2403	14.0326	2	3	2	1	0	1	1	3	2	3	1	1	3	3	3	3	3	3	3	3	3
>ENSSSCP00000003959	157	0.761745	5.90259e-06	MACF1	none	microtubule-actin crosslinking factor 1 [Source:HGNC Symbol;Acc:13664]|6|ENSSSCG00000003654|ENSSSCT00000004050	3362959	3.35261e+06	3.44332e+06	3.22351e+06	3.4324e+06	2561716	2.44514e+06	2.61747e+06	2.59138e+06	2.51185e+06	2.5722e+06	2.63226e+06	21.6769	21.7154	21.6202	21.7108	21.2215	21.3197	21.3053	21.2603	21.2946	21.3279	121	145	127	136	56	75	93	96	110	138	135	115	157	157	157	157	157	157	157	157	157
>ENSSSCP00000027484	11	0.763743	0.00450779	PPM1G	none	protein phosphatase, Mg2+/Mn2+ dependent, 1G [Source:HGNC Symbol;Acc:9278]|3|ENSSSCG00000027135|ENSSSCT00000023870	246672	219125	260963	261533	245069	188394	181600	180881	197824	188414	194409	187238	17.7414	17.9935	17.9966	17.9028	17.4704	17.4647	17.5939	17.5235	17.5687	17.5145	7	12	11	7	3	7	9	6	9	10	11	8	11	11	11	11	11	11	11	11	11
>ENSSSCP00000009817	3	0.763898	0.00675537	NAP1L5	none	nucleosome assembly protein 1-like 5 [Source:HGNC Symbol;Acc:19968]|8|ENSSSCG00000009209|ENSSSCT00000010083	78781.8	68713.5	84054.1	82426.7	79932.7	60181.2	57173.2	52721.5	72024.6	66554.7	63917.1	48696.4	16.0683	16.359	16.3308	16.2865	15.8031	15.6861	16.1362	16.0223	15.9639	15.5715	2	3	2	3	1	2	2	2	2	2	3	2	3	3	3	3	3	3	3	3	3
>ENSSSCP00000019807	13	0.764992	0.00643981	CIAPIN1	none	cytokine induced apoptosis inhibitor 1 [Source:HGNC Symbol;Acc:28050]|6|ENSSSCG00000029519|ENSSSCT00000028362	557755	558933	510057	627033	534997	426678	400600	428364	424850	437298	437526	431430	19.0923	18.9603	19.2582	19.0292	18.6118	18.7085	18.6966	18.7383	18.739	18.7188	11	11	11	10	6	9	9	10	11	13	13	12	13	13	13	13	13	13	13	13	13
>ENSSSCP00000018094	18	0.765223	0.00272242	G3BP1	none	GTPase activating protein (SH3 domain) binding protein 1 [Source:HGNC Symbol;Acc:30292]|16|ENSSSCG00000017079|ENSSSCT00000018595	1.24097e+06	1.14202e+06	1.35749e+06	1.28866e+06	1.17572e+06	949622	884468	901328	981726	974768	996829	958616	20.1232	20.3725	20.2974	20.1651	19.7545	19.7817	19.905	19.8947	19.927	19.8706	13	16	17	15	11	13	16	16	14	17	16	15	18	18	18	18	18	18	18	18	18
>ENSSSCP00000026919	7	0.765478	0.0033594	LIMA1	none	LIM domain and actin binding 1 [Source:HGNC Symbol;Acc:24636]|5|ENSSSCG00000022766|ENSSSCT00000024008	129203	137921	125119	132854	120919	98902.2	125691	99453.3	86808.2	89442.6	102764	89254.5	17.0735	16.9329	17.0195	16.8837	16.9395	16.6017	16.4055	16.4487	16.649	16.4456	5	9	6	6	2	3	4	5	7	7	6	6	7	7	7	7	7	7	7	7	7
>ENSSSCP00000016556	7	0.765682	0.0305194	HSD11B1	none	hydroxysteroid (11-beta) dehydrogenase 1 [Source:HGNC Symbol;Acc:5208]|GL894531.1|ENSSSCG00000015616|ENSSSCT00000017010	2.73005e+06	2.74986e+06	3056739	2.67634e+06	2.43726e+06	2.09035e+06	2839321	2.31559e+06	2.1502e+06	1.41425e+06	1.9279e+06	1.89484e+06	21.3909	21.5436	21.3518	21.2168	21.4371	21.143	21.036	20.4316	20.8786	20.8536	7	7	6	7	5	5	6	6	7	8	7	7	7	7	7	7	7	7	7	7	7
>ENSSSCP00000014919	4	0.765842	0.000834742	HNRNPAB	none	heterogeneous nuclear ribonucleoprotein A/B [Source:HGNC Symbol;Acc:5034]|2|ENSSSCG00000014031|ENSSSCT00000015327	1173363	1195279	1.17719e+06	1.12509e+06	1.19589e+06	898610	757740	1.0459e+06	909988	886477	879452	912101	20.1889	20.1669	20.1016	20.1897	19.5313	19.9963	19.7955	19.7577	19.7462	19.7988	4	4	4	4	4	4	4	4	4	4	4	4	4	4	4	4	4	4	4	4	4
>ENSSSCP00000004618	2	0.766541	0.0140192	SMAP1	none	small ArfGAP 1 [Source:HGNC Symbol;Acc:19651]|1|ENSSSCG00000004276|ENSSSCT00000004726	66618.9	77883.9	61977.2	58701.6	67912.9	51066.1	48130.6	50922.4	65343.8	48137.9	44769.9	49092	16.249	15.9194	15.8411	16.0514	15.5547	15.636	15.9958	15.5549	15.4502	15.5832	1	1	2	1	0	1	1	1	1	2	1	2	2	2	2	2	2	2	2	2	2
>ENSSSCP00000010972	18	0.768502	4.60245e-05	P4HA1	ECM Regulators	Sus scrofa prolyl 4-hydroxylase, alpha polypeptide I (P4HA1), mRNA. [Source:RefSeq mRNA;Acc:NM_001097435]|14|ENSSSCG00000010292|ENSSSCT00000011264	3.08001e+06	3186952	3.12417e+06	2.88336e+06	3125559	2.36699e+06	2.26481e+06	2411373	2.58805e+06	2.26894e+06	2242171	2.42662e+06	21.6037	21.575	21.4593	21.5757	21.111	21.2014	21.3034	21.1136	21.0965	21.2105	17	17	17	18	18	18	17	17	18	18	17	18	18	18	18	18	18	18	18	18	18
>ENSSSCP00000017375	2	0.768958	0.0437796	STAM2	none	signal transducing adaptor molecule (SH3 domain and ITAM motif) 2 [Source:HGNC Symbol;Acc:11358]|15|ENSSSCG00000016399|ENSSSCT00000017856	24591.9	21803.4	20676.7	28898.9	26988.4	18910.1	18681.5	21703.8	18326.1	17250.3	18887.5	18611.4	14.4123	14.3357	14.8187	14.7201	14.1893	14.4057	14.1616	14.0743	14.2051	14.1839	2	2	2	2	0	2	0	1	1	3	1	2	2	2	2	2	2	2	2	2	2
>ENSSSCP00000016148	6	0.769242	0.0093829	SRPRA	none	Signal recognition particle receptor subunit alpha; Uncharacterized protein [Source:UniProtKB/TrEMBL;Acc:F1S754]|9|ENSSSCG00000015227|ENSSSCT00000016593	152522	147441	168996	137679	155972	117326	118077	100442	106434	98107	136366	144533	17.1698	17.3666	17.0709	17.2509	16.8494	16.616	16.6996	16.5821	17.0571	17.141	3	6	4	8	3	2	3	3	3	5	4	4	6	6	6	6	6	6	6	6	6
>ENSSSCP00000024920	3	0.769415	0.0297995	RPN2	none	ribophorin II [Source:HGNC Symbol;Acc:10382]|JH118447.1|ENSSSCG00000028728|ENSSSCT00000027680	444648	532364	393903	397426	454898	342119	363481	357933	310805	332646	331910	355939	19.0221	18.5875	18.6003	18.7952	18.4715	18.4493	18.2457	18.3436	18.3404	18.4413	8	9	9	8	7	7	9	8	8	9	8	9	3	3	3	3	3	3	3	3	3
>ENSSSCP00000004639	16	0.769526	2.77944e-05	SYNCRIP	none	synaptotagmin binding, cytoplasmic RNA interacting protein [Source:HGNC Symbol;Acc:16918]|1|ENSSSCG00000004294|ENSSSCT00000004748	2.34486e+06	2.39715e+06	2.37686e+06	2.29803e+06	2.30738e+06	1.80443e+06	1.82534e+06	1.88835e+06	1.8762e+06	1.66644e+06	1.68017e+06	1.89006e+06	21.1929	21.1806	21.132	21.1378	20.7997	20.8487	20.8394	20.6683	20.6802	20.85	14	14	14	13	13	13	14	15	14	15	15	16	16	16	16	16	16	16	16	16	16
>ENSSSCP00000024488	7	0.770268	0.024718	TRIP12	none	Uncharacterized protein [Source:UniProtKB/TrEMBL;Acc:I3LK74]|GL892628.1|ENSSSCG00000024373|ENSSSCT00000029290	51249.5	52941.7	53566.6	49847.4	48642.3	39475.9	36786.7	26587.9	39362.1	47419.5	38058.1	48640.9	15.6921	15.709	15.6052	15.5699	15.1669	14.6985	15.2645	15.5332	15.2159	15.5699	4	4	0	4	0	0	2	2	2	4	4	7	7	7	7	7	7	7	7	7	7
>ENSSSCP00000014220	4	0.771122	0.00301084	RPS13	none	40S ribosomal protein S13 [Source:UniProtKB/Swiss-Prot;Acc:P62279]|2|ENSSSCG00000013381|ENSSSCT00000014615	1.23578e+06	1.36147e+06	1.15487e+06	1223508	1.20329e+06	952940	1.1086e+06	1.04092e+06	997407	822746	809386	938588	20.3767	20.1393	20.2226	20.1985	20.0803	19.9894	19.9278	19.6501	19.6265	19.8401	5	5	5	5	5	5	5	5	5	5	5	5	4	4	4	4	4	4	4	4	4
>ENSSSCP00000007926	4	0.771246	0.0196867	NCOA5	none	nuclear receptor coactivator 5 [Source:HGNC Symbol;Acc:15909]|17|ENSSSCG00000007438|ENSSSCT00000008142	773322	749142	671623	892893	779630	596422	440968	696971	619542	597241	687168	536640	19.5149	19.3573	19.7681	19.5724	18.7503	19.4107	19.2408	19.188	19.3903	19.0336	3	3	2	2	1	2	2	2	2	4	4	2	4	4	4	4	4	4	4	4	4
>ENSSSCP00000008563	9	0.771309	0.0446219	HN1L	none	Sus scrofa hematological and neurological expressed 1-like (HN1L), mRNA. [Source:RefSeq mRNA;Acc:NM_001048070]|3|ENSSSCG00000008019|ENSSSCT00000008787	634648	560993	604988	718558	654052	489509	317386	658839	425985	471300	571053	492493	19.0976	19.2065	19.4547	19.319	18.2759	19.3296	18.7004	18.8463	19.1233	18.9097	8	8	9	7	5	7	6	8	6	7	8	7	9	9	9	9	9	9	9	9	9
>ENSSSCP00000023436	10	0.771455	0.00191817	PALLD	none	palladin, cytoskeletal associated protein [Source:HGNC Symbol;Acc:17068]|14|ENSSSCG00000029331|ENSSSCT00000022985	740850	819271	728343	673377	742407	571532	533911	552501	548476	521889	633456	638958	19.644	19.4743	19.3611	19.5019	19.0262	19.0756	19.0651	18.9934	19.2729	19.2854	8	10	9	9	7	8	9	8	9	10	10	10	10	10	10	10	10	10	10	10	10
>ENSSSCP00000016981	3	0.772334	0.0105303	ZC3H15	none	zinc finger CCCH-type containing 15 [Source:HGNC Symbol;Acc:29528]|15|ENSSSCG00000016026|ENSSSCT00000017451	51173.3	43591.5	55562	51846.9	53692.7	39522.9	40545.9	35426	38992.6	38542.3	41877.6	41752.9	15.4118	15.7618	15.662	15.7124	15.3073	15.1125	15.2509	15.2342	15.3539	15.3496	3	3	3	3	2	2	3	3	3	3	3	2	3	3	3	3	3	3	3	3	3
>ENSSSCP00000003805	18	0.773514	0.00512501	DDOST	none	dolichyl-diphosphooligosaccharide--protein glycosyltransferase subunit (non-catalytic) [Source:HGNC Symbol;Acc:2728]|6|ENSSSCG00000003505|ENSSSCT00000003894	1.98417e+06	2.19649e+06	1.8325e+06	1.87448e+06	2.03323e+06	1.53479e+06	1.58249e+06	1.59519e+06	1.55411e+06	1.54314e+06	1.47397e+06	1.45983e+06	21.0668	20.8054	20.8381	20.9553	20.5938	20.6053	20.5677	20.5574	20.4913	20.4774	17	18	18	18	15	16	16	17	18	18	18	18	18	18	18	18	18	18	18	18	18
>ENSSSCP00000026549	6	0.776055	0.023441	CORO1A	none	coronin, actin binding protein, 1A [Source:HGNC Symbol;Acc:2252]|GL892962.1|ENSSSCG00000029691|ENSSSCT00000031067	172342	183287	156462	179225	170393	133747	121293	104635	177449	149737	142646	106720	17.4837	17.2554	17.4514	17.3785	16.8881	16.675	17.437	17.1921	17.1221	16.7035	5	4	4	5	3	5	4	3	5	4	5	3	6	6	6	6	6	6	6	6	6
>ENSSSCP00000026895	20	0.778001	0.00969618	ACTN1	none	Uncharacterized protein [Source:UniProtKB/TrEMBL;Acc:I3LS04]|7|ENSSSCG00000020703|ENSSSCT00000029512	19518471	22251766	18077148	17556010	20188960	15185390	15101043	16143782	14613377	13297170	14405850	17551118	24.4074	24.1077	24.0655	24.2671	23.8481	23.9445	23.8008	23.6646	23.7802	24.0651	20	20	19	20	19	19	18	19	19	20	19	19	20	20	20	20	20	20	20	20	20
>ENSSSCP00000016769	3	0.778135	0.0121238	RAB11FIP1	none	RAB11 family interacting protein 1 (class I) [Source:HGNC Symbol;Acc:30265]|GL893552.1|ENSSSCG00000015823|ENSSSCT00000017231	60541.9	54346.9	62759	67744.1	57317.5	47109.8	35702.3	50637.2	55823.8	50216.4	45970.9	44308.1	15.7299	15.9375	16.0478	15.8067	15.1237	15.6279	15.7686	15.6159	15.4884	15.4353	2	3	3	3	1	2	1	2	3	3	3	3	3	3	3	3	3	3	3	3	3
>ENSSSCP00000007202	26	0.778691	0.000147635	CSDE1	none	cold shock domain containing E1, RNA-binding [Source:HGNC Symbol;Acc:29905]|4|ENSSSCG00000006752|ENSSSCT00000007397	1.11848e+06	1.07137e+06	1.13389e+06	1.18956e+06	1.07909e+06	870948	868707	827658	947588	869416	861723	850594	20.031	20.1128	20.182	20.0414	19.7285	19.6587	19.8539	19.7297	19.7169	19.6981	21	25	23	23	21	20	19	23	25	25	25	24	26	26	26	26	26	26	26	26	26
>ENSSSCP00000020171	8	0.778794	5.21514e-05	PCNA	none	proliferating cell nuclear antigen [Source:HGNC Symbol;Acc:8729]|17|ENSSSCG00000030642|ENSSSCT00000032581	575964	565173	583662	573058	581963	448557	467534	467938	473415	424949	412615	444893	19.1083	19.1548	19.1283	19.1506	18.8347	18.836	18.8527	18.6969	18.6544	18.7631	8	8	8	8	7	8	8	7	8	8	8	8	8	8	8	8	8	8	8	8	8
>ENSSSCP00000003869	16	0.778985	0.000572818	NUDC	none	nudC nuclear distribution protein [Source:HGNC Symbol;Acc:8045]|6|ENSSSCG00000003566|ENSSSCT00000003960	1.27685e+06	1.38184e+06	1.2148e+06	1.22419e+06	1.28659e+06	994650	937395	1.0508e+06	1.04638e+06	954825	968305	1.0102e+06	20.3982	20.2123	20.2234	20.2951	19.8383	20.0031	19.997	19.8649	19.8851	19.9462	16	16	16	16	15	14	15	16	16	16	16	17	16	16	16	16	16	16	16	16	16
>ENSSSCP00000002240	3	0.779199	0.0335546	DAD1	none	Sus scrofa defender against cell death 1 (DAD1), mRNA. [Source:RefSeq mRNA;Acc:NM_213944]|7|ENSSSCG00000002050|ENSSSCT00000002293	401372	462197	345100	358548	439641	312748	330684	347532	314331	272394	286840	324709	18.8181	18.3967	18.4518	18.746	18.3351	18.4068	18.2619	18.0553	18.1299	18.3088	3	3	3	3	3	3	3	3	3	3	3	3	3	3	3	3	3	3	3	3	3
>ENSSSCP00000000791	25	0.779412	0.0014825	FKBP4	none	FK506 binding protein 4, 59kDa [Source:HGNC Symbol;Acc:3720]|5|ENSSSCG00000000743|ENSSSCT00000000807	1.52782e+06	1.39805e+06	1637112	1602093	1.47402e+06	1.1908e+06	1.06029e+06	1.24958e+06	1.27142e+06	1.23334e+06	1.18977e+06	1.14041e+06	20.415	20.6427	20.6115	20.4913	20.016	20.253	20.278	20.2341	20.1822	20.1211	21	26	21	22	14	17	20	20	22	24	26	19	25	25	25	25	25	25	25	25	25
>ENSSSCP00000022448	3	0.779458	0.0102732	FARP2	none	Uncharacterized protein [Source:UniProtKB/TrEMBL;Acc:I3LEG0]|11|ENSSSCG00000026863|ENSSSCT00000026699	66552	76595.4	59004.6	64815.2	65792.7	51874.5	58922.5	50597.8	47524.8	47473.9	53445.3	53282.6	16.225	15.8485	15.984	16.0056	15.8465	15.6268	15.5364	15.5348	15.7058	15.7014	7	12	8	9	4	7	8	8	10	11	8	7	3	3	3	3	3	3	3	3	3
>ENSSSCP00000001627	70	0.779981	6.15844e-05	DST	none	dystonin [Source:HGNC Symbol;Acc:1090]|7|ENSSSCG00000001499|ENSSSCT00000001671	1.07161e+06	1.04233e+06	1.11575e+06	1.10112e+06	1.02726e+06	835838	865386	831869	783893	785366	823070	925443	19.9914	20.0896	20.0705	19.9704	19.723	19.666	19.5803	19.583	19.6507	19.8198	46	64	58	48	10	21	39	37	43	56	53	46	70	70	70	70	70	70	70	70	70
>ENSSSCP00000010498	3	0.780257	0.00125888	ATXN2	none	Uncharacterized protein [Source:UniProtKB/TrEMBL;Acc:F1RMZ0]|14|ENSSSCG00000009834|ENSSSCT00000010778	37613.3	35203.1	37214.6	39030	39005.2	29348	25426.4	26886.2	33745.4	29631.8	32100.3	28297.9	15.1034	15.1836	15.2523	15.2514	14.634	14.7146	15.0424	14.8549	14.9703	14.7884	3	11	6	7	0	3	2	4	10	8	8	10	3	3	3	3	3	3	3	3	3
>ENSSSCP00000012619	10	0.780652	0.00616296	TFRC	none	Sus scrofa transferrin receptor (p90, CD71) (TFRC), mRNA. [Source:RefSeq mRNA;Acc:NM_214001]|13|ENSSSCG00000011848|ENSSSCT00000012960	333977	367310	309478	314020	345101	260720	268579	257320	251985	256161	257463	272813	18.4866	18.2395	18.2605	18.3967	18.035	17.9732	17.943	17.9667	17.974	18.0576	15	16	14	15	14	14	11	12	13	14	15	13	10	10	10	10	10	10	10	10	10
>ENSSSCP00000020444	3	0.781039	0.0257388	TRMT5	none	tRNA methyltransferase 5 [Source:HGNC Symbol;Acc:23141]|1|ENSSSCG00000024529|ENSSSCT00000027040	74272.6	77333.3	70683.6	71952.5	77121	58009.8	68506.6	65994.5	54285.4	39883.9	52626.1	66762.1	16.2388	16.1091	16.1348	16.2348	16.064	16.0101	15.7283	15.2835	15.6835	16.0267	1	2	2	1	0	0	2	2	2	1	2	2	3	3	3	3	3	3	3	3	3
>ENSSSCP00000026457	2	0.782884	0.00836878	MAP2K1	none	mitogen-activated protein kinase kinase 1 [Source:HGNC Symbol;Acc:6840]|1|ENSSSCG00000029873|ENSSSCT00000023493	137093	150888	126021	126018	145446	107328	115720	111315	103294	104453	100892	108296	17.2031	16.9433	16.9433	17.1501	16.8203	16.7643	16.6564	16.6725	16.6225	16.7246	2	2	2	2	1	2	2	2	2	2	2	2	2	2	2	2	2	2	2	2	2
>ENSSSCP00000029600	7	0.784119	0.00513465	NACA	none	Uncharacterized protein [Source:UniProtKB/TrEMBL;Acc:I3LAR5]|5|ENSSSCG00000020830|ENSSSCT00000033645	2.69269e+06	2.43904e+06	2.98694e+06	2697065	2.64771e+06	2.11139e+06	1996438	2.07189e+06	2.10213e+06	2.03854e+06	2.2055e+06	2.25382e+06	21.2179	21.5102	21.363	21.3363	20.929	20.9825	21.0034	20.9591	21.0727	21.1039	7	7	7	6	5	6	6	6	5	7	7	7	7	7	7	7	7	7	7	7	7
>ENSSSCP00000004130	6	0.785725	0.0259129	DOCK7	none	Uncharacterized protein [Source:UniProtKB/TrEMBL;Acc:F1S7Z8]|6|ENSSSCG00000003818|ENSSSCT00000004225	56201.8	48257.8	55464.2	58994.5	62090.7	44159.2	50522.1	35964.1	51798.8	44918.2	47910.9	33840.9	15.5585	15.7593	15.8483	15.9221	15.6246	15.1343	15.6606	15.455	15.5481	15.0465	3	3	2	3	2	1	4	4	3	5	7	3	6	6	6	6	6	6	6	6	6
>ENSSSCP00000007389	6	0.785735	0.00026914	SH3GLB1	none	Sus scrofa SH3-domain GRB2-like endophilin B1 (SH3GLB1), mRNA. [Source:RefSeq mRNA;Acc:NM_001168421]|4|ENSSSCG00000006930|ENSSSCT00000007592	242024	238260	228307	256003	245526	190167	163270	192452	191317	202178	195801	195983	17.8622	17.8006	17.9658	17.9055	17.3169	17.5541	17.5456	17.6253	17.579	17.5804	6	7	6	7	4	5	4	6	6	7	6	5	6	6	6	6	6	6	6	6	6
>ENSSSCP00000009796	6	0.785793	0.012339	METAP1	none	methionyl aminopeptidase 1 [Source:HGNC Symbol;Acc:15789]|8|ENSSSCG00000009186|ENSSSCT00000010059	109002	93385	109167	118141	115316	85653.2	67082.1	89170.5	83964	97893.1	89632.3	86177.2	16.5109	16.7362	16.8501	16.8152	16.0336	16.4443	16.3575	16.5789	16.4517	16.395	5	7	5	7	2	0	3	6	4	6	5	4	6	6	6	6	6	6	6	6	6
>ENSSSCP00000000304	12	0.786057	0.00695876	HNRNPA1	none	Sus scrofa heterogeneous nuclear ribonucleoprotein A1 (HNRNPA1), mRNA. [Source:RefSeq mRNA;Acc:NM_001077218]|5|ENSSSCG00000000288|ENSSSCT00000000309	7121351	7640051	6.30597e+06	7240152	7.29923e+06	5.59778e+06	4625740	6.9789e+06	5.34189e+06	5.42027e+06	5.55764e+06	5.66226e+06	22.8652	22.5883	22.7876	22.7993	22.1413	22.7346	22.3489	22.3699	22.406	22.4329	15	15	15	14	14	14	14	15	14	15	15	14	12	12	12	12	12	12	12	12	12
>ENSSSCP00000000634	6	0.786505	0.0044868	ARHGDIB	none	Rho GDP dissociation inhibitor (GDI) beta [Source:HGNC Symbol;Acc:679]|5|ENSSSCG00000000604|ENSSSCT00000000649	254056	243011	244469	248620	280122	199816	187151	172718	234570	216273	214532	173654	17.8907	17.8993	17.9236	18.0957	17.5138	17.3981	17.8397	17.7225	17.7108	17.4059	4	6	5	6	5	5	3	3	5	5	6	6	6	6	6	6	6	6	6	6	6
>ENSSSCP00000008734	3	0.787651	0.00553038	TXNDC9	none	thioredoxin domain containing 9 [Source:HGNC Symbol;Acc:24110]|3|ENSSSCG00000008181|ENSSSCT00000008960	54138.1	48992.8	55799.8	59259.4	52500.5	42641.9	34998.9	42755.7	48776.7	41501.3	47751.1	40067.9	15.5803	15.768	15.8548	15.68	15.095	15.3838	15.5739	15.3409	15.5432	15.2902	2	3	3	3	1	2	3	3	2	3	3	3	3	3	3	3	3	3	3	3	3
>ENSSSCP00000026002	12	0.788546	0.00901582	G3BP2	none	GTPase activating protein (SH3 domain) binding protein 2 [Source:HGNC Symbol;Acc:30291]|8|ENSSSCG00000022940|ENSSSCT00000026131	439290	384037	441357	485677	446090	346401	381086	331835	346961	317091	344157	357273	18.5509	18.7516	18.8896	18.767	18.5398	18.3401	18.4044	18.2745	18.3927	18.4467	10	13	12	11	7	7	8	8	10	12	12	10	12	12	12	12	12	12	12	12	12
>ENSSSCP00000019023	4	0.789278	0.00706594	EIF4A1	none	Sus scrofa eukaryotic translation initiation factor 4A1 (EIF4A1), mRNA. [Source:RefSeq mRNA;Acc:NM_001100196]|12|ENSSSCG00000017957|ENSSSCT00000019541	1e+06	1.03971e+06	869271	1.07003e+06	1.021e+06	789281	848945	910062	705444	684818	780024	806396	19.9878	19.7294	20.0292	19.9616	19.6953	19.7956	19.4282	19.3854	19.5732	19.6211	23	25	24	25	24	23	24	25	25	26	25	25	4	4	4	4	4	4	4	4	4
>ENSSSCP00000003686	3	0.78943	0.00500175	KIF1B	none	kinesin family member 1B [Source:HGNC Symbol;Acc:16636]|6|ENSSSCG00000003401|ENSSSCT00000003773	20927.8	20337.5	21334.8	22478.9	19559.9	16521	15417	15072.2	17416.5	17658.5	19801.9	13759.9	14.3119	14.3809	14.4563	14.2556	13.9122	13.8796	14.0882	14.1081	14.2734	13.7482	8	9	9	7	4	6	8	7	8	7	9	7	3	3	3	3	3	3	3	3	3
>ENSSSCP00000019379	7	0.790111	6.98004e-05	RPL23A	none	|GL894032.2|ENSSSCG00000029802|ENSSSCT00000023017	2498010	2.38584e+06	2.47846e+06	2.58394e+06	2.54379e+06	1.9737e+06	1.98971e+06	1.84288e+06	2.19149e+06	1.84879e+06	1.99669e+06	1.97267e+06	21.1861	21.241	21.3011	21.2785	20.9241	20.8135	21.0635	20.8182	20.9292	20.9117	7	7	7	7	7	7	7	7	7	7	7	7	7	7	7	7	7	7	7	7	7
>ENSSSCP00000025445	2	0.791089	0.0156569	POLDIP2	none	polymerase (DNA-directed), delta interacting protein 2 [Source:HGNC Symbol;Acc:23781]|12|ENSSSCG00000028920|ENSSSCT00000023831	63666.1	63119.7	56417.2	61877.2	73250.2	50365.5	48604.3	55264.2	52640.3	40490.5	46866.6	58327.1	15.9458	15.7838	15.9171	16.1605	15.5688	15.7541	15.6839	15.3053	15.5163	15.8319	1	3	2	1	0	0	1	1	1	2	2	2	2	2	2	2	2	2	2	2	2
>ENSSSCP00000016816	4	0.791464	0.0161283	PRPF40A	none	PRP40 pre-mRNA processing factor 40 homolog A (S. cerevisiae) [Source:HGNC Symbol;Acc:16463]|15|ENSSSCG00000015867|ENSSSCT00000017278	57444.9	62319.7	50102.6	62569.8	54787.4	45465.5	45679.6	49270	47670.5	42786.9	43739.1	43647.1	15.9274	15.6126	15.9332	15.7416	15.4793	15.5884	15.5408	15.3849	15.4166	15.4136	3	3	4	2	1	2	1	1	1	4	3	2	4	4	4	4	4	4	4	4	4
>ENSSSCP00000012733	6	0.791597	0.00148604	RPL24	none	ribosomal protein L24 [Source:HGNC Symbol;Acc:10325]|13|ENSSSCG00000011952|ENSSSCT00000013078	1.13314e+06	1.20058e+06	1.10499e+06	1.16161e+06	1.0654e+06	896993	937124	925541	929846	801512	776216	1.01172e+06	20.1953	20.0756	20.1477	20.023	19.8379	19.8199	19.8266	19.6124	19.5661	19.9484	6	6	6	6	6	6	6	6	6	6	6	6	6	6	6	6	6	6	6	6	6
>ENSSSCP00000029166	23	0.792018	0.0322358	MX1	none	Sus scrofa myxovirus (influenza virus) resistance 1, interferon-inducible protein p78 (mouse) (MX1), mRNA. [Source:RefSeq mRNA;Acc:NM_214061]|13|ENSSSCG00000012077|ENSSSCT00000034038	751506	696159	753460	720471	835934	595206	462784	844994	541812	557919	530785	632942	19.4091	19.5232	19.4586	19.673	18.82	19.6886	19.0474	19.0897	19.0178	19.2717	19	22	15	22	14	18	15	14	17	19	18	17	23	23	23	23	23	23	23	23	23
>ENSSSCP00000025164	10	0.793419	0.00273958	OPTN	none	Sus scrofa optineurin (OPTN), mRNA. [Source:RefSeq mRNA;Acc:NM_213961]|10|ENSSSCG00000023247|ENSSSCT00000023307	115548	107823	121982	117768	114619	91677.9	85013.8	76715.8	93490.9	101793	104063	88990.8	16.7183	16.8963	16.8456	16.8065	16.3754	16.2272	16.5125	16.6353	16.6671	16.4414	3	9	10	8	0	4	5	5	8	9	9	7	10	10	10	10	10	10	10	10	10
>ENSSSCP00000019298	4	0.793484	0.0179364	YTHDF2	none	YTH domain family, member 2 [Source:HGNC Symbol;Acc:31675]|6|ENSSSCG00000027686|ENSSSCT00000027438	79269.8	67032.5	85617.1	79821.4	84608.4	62899.4	58157.6	58448.9	63930.5	61055.6	68922.4	66881.1	16.0326	16.3856	16.2845	16.3685	15.8277	15.8349	15.9642	15.8978	16.0727	16.0293	3	4	4	5	2	2	2	4	2	5	3	4	4	4	4	4	4	4	4	4	4
>ENSSSCP00000016267	17	0.793524	0.0102484	ASNS	none	Sus scrofa asparagine synthetase (glutamine-hydrolyzing) (ASNS), mRNA. [Source:RefSeq mRNA;Acc:NM_001167640]|9|ENSSSCG00000015340|ENSSSCT00000016713	719872	787502	654133	659816	778037	571236	586819	673152	575033	523109	540966	528334	19.5869	19.3192	19.3317	19.5695	19.1626	19.3606	19.1333	18.9968	19.0452	19.0111	17	16	14	15	15	13	15	15	16	17	16	15	17	17	17	17	17	17	17	17	17
>ENSSSCP00000012061	5	0.795556	0.0163904	LIMD1	none	|13|ENSSSCG00000011313|ENSSSCT00000012385	63831.2	58844	61615.9	65686	69178.8	50781.3	38640.1	61453	52080.6	51584.2	56210.6	44719	15.8446	15.911	16.0033	16.078	15.2378	15.9072	15.6685	15.6546	15.7786	15.4486	3	5	5	4	0	2	3	4	4	4	5	4	5	5	5	5	5	5	5	5	5
>ENSSSCP00000010879	13	0.795726	0.0333866	HNRNPF	none	heterogeneous nuclear ribonucleoprotein F [Source:HGNC Symbol;Acc:5039]|14|ENSSSCG00000010203|ENSSSCT00000011169	1.42054e+06	1.42224e+06	1331991	1571488	1.35644e+06	1.13036e+06	803009	1.47701e+06	1.05904e+06	1.08169e+06	1.27613e+06	1085287	20.4397	20.3452	20.5837	20.3714	19.6151	20.4942	20.0143	20.0449	20.2833	20.0496	14	14	14	14	9	13	12	14	12	14	14	13	13	13	13	13	13	13	13	13	13
>ENSSSCP00000008224	15	0.796129	0.00658	HIP1	none	huntingtin interacting protein 1 [Source:HGNC Symbol;Acc:4913]|3|ENSSSCG00000007700|ENSSSCT00000008443	990697	1.08625e+06	964077	895198	1.01727e+06	788723	836478	770316	751463	758133	800306	815642	20.0509	19.8788	19.7718	19.9563	19.674	19.5551	19.5193	19.5321	19.6102	19.6376	15	16	13	13	9	8	12	14	13	19	16	13	15	15	15	15	15	15	15	15	15
>ENSSSCP00000018286	12	0.796293	0.00014667	PRKAR1A	none	protein kinase, cAMP-dependent, regulatory, type I, alpha [Source:HGNC Symbol;Acc:9388]|12|ENSSSCG00000017259|ENSSSCT00000018788	464281	450169	460543	478805	467608	369704	338038	390750	397140	372838	341746	377710	18.7801	18.813	18.8691	18.8349	18.3668	18.5759	18.5993	18.5082	18.3826	18.5269	13	13	13	12	8	10	13	13	11	12	12	12	12	12	12	12	12	12	12	12	12
>ENSSSCP00000016360	3	0.796606	0.00642285	PUS7	none	pseudouridylate synthase 7 homolog (S. cerevisiae) [Source:HGNC Symbol;Acc:26033]|9|ENSSSCG00000015428|ENSSSCT00000016808	36786	32210.6	39346.3	37489.7	38097.2	29303.9	34380.2	30428.6	29765.8	26700.2	26508.4	28040.4	14.9752	15.2639	15.1942	15.2174	15.0693	14.8931	14.8614	14.7046	14.6942	14.7752	3	2	3	4	2	1	1	2	3	3	2	2	3	3	3	3	3	3	3	3	3
>ENSSSCP00000023115	45	0.796874	2.46409e-06	RRBP1	none	ribosome binding protein 1 [Source:HGNC Symbol;Acc:10448]|17|ENSSSCG00000024692|ENSSSCT00000026565	2.51118e+06	2.50572e+06	2.5839e+06	2.43025e+06	2524861	2.00109e+06	2.07056e+06	2.08619e+06	1.97241e+06	1.96114e+06	1.97968e+06	1.93658e+06	21.2568	21.3011	21.2127	21.2678	20.9816	20.9924	20.9115	20.9033	20.9168	20.8851	40	44	40	41	34	35	40	40	41	44	43	42	45	45	45	45	45	45	45	45	45
>ENSSSCP00000012387	6	0.79703	0.0129926	MCM2	none	minichromosome maintenance complex component 2 [Source:HGNC Symbol;Acc:6944]|13|ENSSSCG00000011624|ENSSSCT00000012721	85624.4	92569.5	87692.6	78398	83837.6	68245.2	86744.4	60431	77133.2	59864.2	64312.4	60986.1	16.4982	16.4202	16.2585	16.3553	16.4045	15.883	16.2351	15.8694	15.9728	15.8962	5	6	4	5	4	4	1	2	5	4	4	1	6	6	6	6	6	6	6	6	6
>ENSSSCP00000015235	9	0.79728	0.00254073	HNRNPA0	none	heterogeneous nuclear ribonucleoprotein A0 [Source:HGNC Symbol;Acc:5030]|2|ENSSSCG00000014322|ENSSSCT00000015648	517327	505571	490621	538405	534709	412454	352525	470501	415980	382753	459824	393142	18.9476	18.9042	19.0383	19.0284	18.4274	18.8438	18.6662	18.5461	18.8107	18.5847	8	9	8	7	4	5	6	8	8	9	9	8	9	9	9	9	9	9	9	9	9
>ENSSSCP00000027240	4	0.797758	0.035911	TNIK	none	TRAF2 and NCK interacting kinase [Source:HGNC Symbol;Acc:30765]|13|ENSSSCG00000020763|ENSSSCT00000030826	45740.6	54920.6	43434.8	40112.4	44494.5	36489.9	41765	36735.3	34211.7	36567.2	36630	33030.4	15.7451	15.4066	15.2918	15.4413	15.35	15.1649	15.0622	15.1583	15.1607	15.0115	3	4	4	4	0	1	2	1	2	3	4	2	4	4	4	4	4	4	4	4	4
>ENSSSCP00000027093	3	0.799822	0.0394405	ANKRD17	none	Sus scrofa ankyrin repeat domain 17 (ANKRD17), mRNA. [Source:RefSeq mRNA;Acc:NM_001201383]|8|ENSSSCG00000024592|ENSSSCT00000028188	39212.4	41256.6	36729.6	38779.4	40083.7	31362.9	36105.7	29549.8	36482.7	37341.5	26830.1	21867.6	15.3323	15.1647	15.243	15.2907	15.1399	14.8509	15.1549	15.1885	14.7116	14.4165	0	3	3	1	0	0	1	0	3	3	4	1	3	3	3	3	3	3	3	3	3
>ENSSSCP00000000381	7	0.802475	0.0104853	SARNP	none	SAP domain containing ribonucleoprotein [Source:HGNC Symbol;Acc:24432]|5|ENSSSCG00000000364|ENSSSCT00000000387	255387	273640	234757	252850	260301	204942	208710	254404	169964	178260	206024	212288	18.0619	17.8408	17.9479	17.9898	17.6711	17.9568	17.3749	17.4436	17.6525	17.6957	6	6	7	6	5	4	5	5	4	5	5	5	7	7	7	7	7	7	7	7	7
>ENSSSCP00000004109	18	0.802573	0.00017523	SERBP1	none	SERPINE1 mRNA binding protein 1 [Source:HGNC Symbol;Acc:17860]|6|ENSSSCG00000003798|ENSSSCT00000004203	3.29216e+06	3.34816e+06	3.21666e+06	3.31331e+06	3290518	2.6422e+06	2634142	2816570	2693579	2.33927e+06	2.69596e+06	2.67367e+06	21.6749	21.6171	21.6598	21.6499	21.3289	21.4255	21.3611	21.1576	21.3624	21.3504	16	18	16	17	15	15	15	17	16	17	16	18	18	18	18	18	18	18	18	18	18
>ENSSSCP00000019622	2	0.802799	0.00695357	SRSF10	none	Sus scrofa serine/arginine-rich splicing factor 10 (SRSF10), transcript variant 2, mRNA. [Source:RefSeq mRNA;Acc:NM_001244368]|GL893661.1|ENSSSCG00000021615|ENSSSCT00000026259	61558.8	66403.8	62633	54318.4	62880	49419.3	53664.5	52940.2	47012.5	48087.2	46790	48021.5	16.019	15.9346	15.7292	15.9403	15.7117	15.6921	15.5208	15.5534	15.5139	15.5514	3	3	3	3	2	3	3	3	2	3	3	3	2	2	2	2	2	2	2	2	2
>ENSSSCP00000023281	4	0.803483	0.00996747	GNS	none	|GL896320.1|ENSSSCG00000022732|ENSSSCT00000026293	172677	159232	175798	190787	164891	138743	110359	150782	154376	145035	146326	125580	17.2808	17.4236	17.5416	17.3312	16.7518	17.2021	17.2361	17.146	17.1588	16.9382	4	4	4	3	2	2	2	4	4	4	4	4	4	4	4	4	4	4	4	4	4
>ENSSSCP00000000122	8	0.803525	0.00821865	MICALL1	none	MICAL-like 1 [Source:HGNC Symbol;Acc:29804]|5|ENSSSCG00000000118|ENSSSCT00000000124	95481.8	88619.6	108742	91327.6	93237.7	76722	74676.3	72140.6	72062.5	76341.6	90194.3	74916.7	16.4353	16.7306	16.4788	16.5086	16.1884	16.1385	16.137	16.2202	16.4607	16.193	4	7	5	5	4	3	4	4	3	5	4	5	8	8	8	8	8	8	8	8	8
>ENSSSCP00000022609	8	0.803609	0.0131432	RPS9	none	ribosomal protein S9 [Source:HGNC Symbol;Acc:10442]|6|ENSSSCG00000029785|ENSSSCT00000027911	2133155	2.43673e+06	2.08549e+06	2.0861e+06	1.9243e+06	1.71422e+06	2.04619e+06	1.83949e+06	1.62298e+06	1603060	1495752	1677861	21.2165	20.992	20.9924	20.8759	20.9645	20.8109	20.6302	20.6124	20.5124	20.6782	8	8	8	8	7	8	8	8	8	8	8	8	8	8	8	8	8	8	8	8	8
>ENSSSCP00000012405	5	0.804131	0.0380312	SRPRB	none	signal recognition particle receptor, B subunit [Source:HGNC Symbol;Acc:24085]|13|ENSSSCG00000011639|ENSSSCT00000012739	213380	249120	189347	194852	220203	171586	170402	184985	162132	171754	167969	172272	17.9265	17.5307	17.572	17.7485	17.3786	17.4971	17.3068	17.39	17.3578	17.3943	5	5	5	5	4	5	5	5	5	5	5	5	5	5	5	5	5	5	5	5	5
>ENSSSCP00000023743	7	0.805748	0.0257735	COTL1	none	coactosin-like 1 (Dictyostelium) [Source:HGNC Symbol;Acc:18304]|GL895339.1|ENSSSCG00000030543|ENSSSCT00000031309	1.71398e+06	1.87534e+06	1.56261e+06	1.70741e+06	1.71057e+06	1.38104e+06	1.01673e+06	1.71988e+06	1279870	1.36552e+06	1.50438e+06	1.39984e+06	20.8387	20.5755	20.7034	20.706	19.9555	20.7139	20.2876	20.381	20.5207	20.4168	7	7	7	7	7	7	7	7	7	7	8	7	7	7	7	7	7	7	7	7	7
>ENSSSCP00000018637	12	0.806108	0.000664923	PPP1R9B	none	protein phosphatase 1, regulatory subunit 9B [Source:HGNC Symbol;Acc:9298]|12|ENSSSCG00000017584|ENSSSCT00000019143	159544	160341	171775	151143	154918	128610	120838	138068	129839	118621	127573	136721	17.2908	17.3902	17.2056	17.2411	16.8827	17.075	16.9864	16.856	16.961	17.0609	7	11	9	9	1	1	6	6	7	12	12	11	12	12	12	12	12	12	12	12	12
>ENSSSCP00000005664	3	0.806312	0.00182088	OSTF1	none	Sus scrofa osteoclast stimulating factor 1 (OSTF1), mRNA. [Source:RefSeq mRNA;Acc:NM_214005]|1|ENSSSCG00000005273|ENSSSCT00000005808	99743.6	96749.1	92122.5	104191	105912	80424.5	70775.7	88320.4	77744.1	81881.8	85598.5	78226.7	16.562	16.4913	16.6689	16.6925	16.111	16.4305	16.2464	16.3213	16.3853	16.2554	3	2	3	3	3	3	3	3	3	3	3	3	3	3	3	3	3	3	3	3	3
>ENSSSCP00000017259	2	0.807002	0.0172347	GIGYF2	none	GRB10 interacting GYF protein 2 [Source:HGNC Symbol;Acc:11960]|15|ENSSSCG00000016291|ENSSSCT00000017740	59569.2	65462.7	51097.6	61887.9	59828.8	48072.5	44288.2	55006.8	50983.5	44058.8	46061.5	48036.2	15.9984	15.641	15.9174	15.8686	15.4346	15.7473	15.6377	15.4271	15.4913	15.5518	2	2	2	2	1	1	1	2	2	2	2	2	2	2	2	2	2	2	2	2	2
>ENSSSCP00000002096	5	0.80701	0.00176301	CD276	none	CD276 molecule [Source:HGNC Symbol;Acc:19137]|JH118811.1|ENSSSCG00000001917|ENSSSCT00000002146	223131	219942	218807	233131	220642	180069	177209	193699	207945	159332	169737	172491	17.7468	17.7393	17.8308	17.7513	17.4351	17.5635	17.6658	17.2817	17.3729	17.3962	5	6	5	4	4	4	3	4	5	5	4	5	5	5	5	5	5	5	5	5	5
>ENSSSCP00000018378	26	0.808192	0.00969244	EFTUD2	none	elongation factor Tu GTP binding domain containing 2 [Source:HGNC Symbol;Acc:30858]|12|ENSSSCG00000017346|ENSSSCT00000018882	717831	777561	644485	768279	681000	580146	578039	672720	546467	513634	589082	580931	19.5686	19.2978	19.5513	19.3773	19.1408	19.3596	19.0598	18.9704	19.1681	19.148	23	26	25	23	11	13	23	21	24	23	25	25	26	26	26	26	26	26	26	26	26
>ENSSSCP00000026013	3	0.808903	0.00917203	POLR1C	none	polymerase (RNA) I polypeptide C, 30kDa [Source:HGNC Symbol;Acc:20194]|7|ENSSSCG00000028007|ENSSSCT00000028506	56213.4	55693	54495.7	60357.9	54307.1	45471.2	48924.2	46571.1	54320.9	43635.2	42990.5	36385.4	15.7652	15.7339	15.8813	15.7289	15.5783	15.5071	15.7292	15.4132	15.3917	15.1511	3	2	3	3	1	2	2	2	3	3	2	2	3	3	3	3	3	3	3	3	3
>ENSSSCP00000019005	11	0.809351	0.0495672	EIF5A	none	|3|ENSSSCG00000017939|ENSSSCT00000019523	12911123	11958086	11888338	15253611	12544457	10449624	7730811	12998319	10654716	10723339	11530244	9060315	23.5115	23.503	23.8626	23.5805	22.8822	23.6318	23.345	23.3543	23.4589	23.1111	11	11	11	11	10	11	11	11	11	11	11	11	11	11	11	11	11	11	11	11	11
>ENSSSCP00000021891	23	0.80956	2.24443e-05	SRRM2	none	serine/arginine repetitive matrix 2 [Source:HGNC Symbol;Acc:16639]|3|ENSSSCG00000023304|ENSSSCT00000026941	483020	488848	481841	462391	499002	391034	369925	406757	389440	381703	410696	387685	18.899	18.8782	18.8188	18.9287	18.4969	18.6338	18.571	18.5421	18.6477	18.5645	16	23	21	23	6	12	18	18	19	19	22	20	23	23	23	23	23	23	23	23	23
>ENSSSCP00000018680	12	0.810716	0.000532293	SRSF1	none	Sus scrofa serine/arginine-rich splicing factor 1 (SRSF1), mRNA. [Source:RefSeq mRNA;Acc:NM_001038007]|12|ENSSSCG00000017626|ENSSSCT00000019188	3.21675e+06	3201147	3.11287e+06	3.36649e+06	3.18649e+06	2.60787e+06	2.29627e+06	2.71563e+06	2.83234e+06	2.44421e+06	2.6735e+06	2.68528e+06	21.6102	21.5698	21.6828	21.6035	21.1309	21.3729	21.4336	21.2209	21.3503	21.3566	12	13	13	12	10	12	11	12	12	13	13	12	12	12	12	12	12	12	12	12	12
>ENSSSCP00000007416	2	0.810765	0.00185693	EEF1D	none	Uncharacterized protein [Source:UniProtKB/TrEMBL;Acc:F1SEV8]|4|ENSSSCG00000006954|ENSSSCT00000007619	772105	786625	800490	777199	724108	625996	531856	663033	637274	596848	705028	621937	19.5853	19.6105	19.5679	19.4658	19.0207	19.3387	19.2816	19.187	19.4273	19.2464	14	13	14	15	13	13	13	14	14	15	15	14	2	2	2	2	2	2	2	2	2
>ENSSSCP00000031028	5	0.810912	0.0108133	FUS	none	FUS; Uncharacterized protein [Source:UniProtKB/TrEMBL;Acc:G8ENL4]|3|ENSSSCG00000030798|ENSSSCT00000036326	584137	528240	624931	590027	593349	473683	369199	503841	493869	454972	542759	477462	19.0108	19.2533	19.1704	19.1785	18.494	18.9426	18.9138	18.7954	19.05	18.865	3	5	4	4	3	3	2	4	5	4	4	3	5	5	5	5	5	5	5	5	5
>ENSSSCP00000013861	9	0.811787	0.00142669	PLCB3	none	phospholipase C, beta 3 (phosphatidylinositol-specific) [Source:HGNC Symbol;Acc:9056]|2|ENSSSCG00000013034|ENSSSCT00000014247	104301	99991.7	101231	101848	114134	84670.4	88150.6	77582.2	86269.5	91132.6	86102.1	78785.4	16.6095	16.6273	16.6361	16.8004	16.4277	16.2434	16.3966	16.4757	16.3938	16.2656	6	9	10	10	5	6	8	5	11	10	12	8	9	9	9	9	9	9	9	9	9
>ENSSSCP00000011384	6	0.812216	0.00755958	TIAL1	none	|14|ENSSSCG00000010685|ENSSSCT00000011686	186825	186975	168213	204474	187637	151742	134052	177575	147978	155231	159521	136096	17.5125	17.3599	17.6416	17.5176	17.0324	17.4381	17.175	17.2441	17.2834	17.0543	6	7	6	7	5	5	6	6	7	7	7	5	6	6	6	6	6	6	6	6	6
>ENSSSCP00000016755	13	0.812583	2.8123e-05	ADAM9	ECM Regulators	Uncharacterized protein [Source:UniProtKB/TrEMBL;Acc:F1RZL4]|15|ENSSSCG00000015808|ENSSSCT00000017216	321028	328954	325822	308691	320646	260862	247092	267261	266257	280870	251665	252028	18.3275	18.3137	18.2358	18.2906	17.9147	18.0279	18.0225	18.0995	17.9411	17.9432	11	9	7	9	5	6	7	8	10	12	11	7	13	13	13	13	13	13	13	13	13
>ENSSSCP00000015820	6	0.814389	0.00296597	PRCP	none	prolylcarboxypeptidase (angiotensinase C) [Source:HGNC Symbol;Acc:9344]|9|ENSSSCG00000014899|ENSSSCT00000016254	161555	149797	156707	175695	164020	131568	143068	124219	138924	138141	129573	115484	17.1926	17.2577	17.4227	17.3235	17.1263	16.9225	17.0839	17.0758	16.9834	16.8173	3	5	5	5	3	3	5	3	5	4	4	5	6	6	6	6	6	6	6	6	6
>ENSSSCP00000017622	9	0.815457	0.0407484	CAV1	none	Sus scrofa caveolin 1, caveolae protein, 22kDa (CAV1), mRNA. [Source:RefSeq mRNA;Acc:NM_214438]|18|ENSSSCG00000016634|ENSSSCT00000018112	900945	949571	928224	892541	833444	734682	820332	882214	631946	566164	628426	879007	19.8569	19.8241	19.7676	19.6687	19.6458	19.7508	19.2694	19.1109	19.2614	19.7455	9	9	9	9	9	9	9	9	9	9	9	9	9	9	9	9	9	9	9	9	9
>ENSSSCP00000023758	6	0.815736	0.00479818	RBM8A	none	RNA binding motif protein 8A [Source:HGNC Symbol;Acc:9905]|4|ENSSSCG00000028509|ENSSSCT00000022923	227254	223272	225244	246329	214171	185379	190698	203776	189646	149055	191987	187114	17.7684	17.7811	17.9102	17.7084	17.5409	17.6366	17.5329	17.1855	17.5506	17.5136	4	6	6	5	4	5	5	4	6	6	6	5	6	6	6	6	6	6	6	6	6
>ENSSSCP00000025836	6	0.817081	0.000517399	KHDRBS1	none	KH domain containing, RNA binding, signal transduction associated 1 [Source:HGNC Symbol;Acc:18116]|6|ENSSSCG00000023122|ENSSSCT00000031351	657717	623674	697766	642396	667032	537408	539601	493428	579765	544986	501808	564862	19.2504	19.4124	19.2931	19.3474	19.0415	18.9125	19.1451	19.0559	18.9368	19.1075	9	10	8	10	8	7	9	9	10	10	10	9	6	6	6	6	6	6	6	6	6
>ENSSSCP00000006498	2	0.817308	0.0137602	CPQ	none	|4|ENSSSCG00000006087|ENSSSCT00000006678	69583.4	62242.7	75972.6	73972.8	66145.5	56871.1	54412.6	48630.8	63433.3	59362.7	60464.3	54922.8	15.9256	16.2132	16.1747	16.0134	15.7317	15.5696	15.953	15.8573	15.8838	15.7451	5	4	4	5	3	4	4	4	5	5	5	4	2	2	2	2	2	2	2	2	2
>ENSSSCP00000022596	6	0.817417	0.0357696	SH3BGR	none	SH3 domain binding glutamic acid-rich protein [Source:HGNC Symbol;Acc:10822]|13|ENSSSCG00000029219|ENSSSCT00000029140	191312	172976	196271	212719	183284	156382	111064	162411	158639	154462	173948	177767	17.4002	17.5825	17.6986	17.4837	16.761	17.3093	17.2754	17.2369	17.4083	17.4396	6	5	5	6	4	4	4	6	5	5	6	6	6	6	6	6	6	6	6	6	6
>ENSSSCP00000025632	12	0.81881	0.00594703	LUZP1	none	leucine zipper protein 1 [Source:HGNC Symbol;Acc:14985]|6|ENSSSCG00000003532|ENSSSCT00000003924	228669	223456	226647	235192	229382	187237	206558	191693	192369	154217	205772	172811	17.7696	17.7901	17.8435	17.8074	17.6562	17.5484	17.5535	17.2346	17.6507	17.3988	7	11	12	10	3	5	5	6	5	8	8	7	12	12	12	12	12	12	12	12	12
>ENSSSCP00000010183	2	0.819154	0.0285193	ARGLU1	none	ssc-mir-7144 [Source:miRBase;Acc:MI0023577]|11|ENSSSCG00000009536|ENSSSCT00000010454	11228.2	12209	11941.9	9763.63	10998.3	9197.63	9525.99	9768.14	10407	10163.4	7645.09	7676.27	13.5757	13.5437	13.2532	13.425	13.2177	13.2539	13.3453	13.3111	12.9003	12.9062	2	2	0	1	1	2	0	1	1	1	1	2	2	2	2	2	2	2	2	2	2
>ENSSSCP00000023039	5	0.820916	0.0265726	CTSD	ECM Regulators	cathepsin D [Source:HGNC Symbol;Acc:2529]|GL896288.1|ENSSSCG00000026418|ENSSSCT00000032276	6608559	6179740	6181973	7670924	6401599	5.42507e+06	4439219	5986368	5394963	5552634	6.20965e+06	4.9676e+06	22.5591	22.5596	22.871	22.61	22.0819	22.5132	22.3632	22.4047	22.5661	22.2441	5	5	5	5	5	5	5	5	5	5	5	5	5	5	5	5	5	5	5	5	5
>ENSSSCP00000008282	9	0.821865	0.0149553	ITGAM	none	Uncharacterized protein [Source:UniProtKB/TrEMBL;Acc:F1RIS5]|3|ENSSSCG00000007754|ENSSSCT00000008501	285466	317740	260393	267202	296526	234614	273024	236021	228384	231287	237396	201574	18.2775	17.9903	18.0276	18.1778	18.0587	17.8486	17.8011	17.8193	17.8569	17.621	8	8	7	7	2	7	7	4	8	9	9	6	9	9	9	9	9	9	9	9	9
>ENSSSCP00000023862	7	0.822154	6.39332e-05	PDAP1	none	PDGFA associated protein 1 [Source:HGNC Symbol;Acc:14634]|3|ENSSSCG00000023257|ENSSSCT00000024950	562728	578580	555804	538410	578120	462649	454750	499536	466029	463899	453247	438435	19.1422	19.0842	19.0383	19.141	18.7947	18.9302	18.8301	18.8235	18.7899	18.742	5	7	6	5	4	4	6	6	5	7	7	5	7	7	7	7	7	7	7	7	7
>ENSSSCP00000019707	5	0.822176	0.0224396	HIST1H1B	none	histone cluster 1, H1b [Source:HGNC Symbol;Acc:4719]|7|ENSSSCG00000030023|ENSSSCT00000024258	1.45385e+06	1.68305e+06	1.35085e+06	1.36142e+06	1.42009e+06	1.19532e+06	1353997	1.20346e+06	1.32396e+06	1.07657e+06	1.13876e+06	1.07519e+06	20.6826	20.3654	20.3767	20.4376	20.3688	20.1988	20.3364	20.038	20.119	20.0362	5	5	5	5	4	4	5	5	5	5	5	4	5	5	5	5	5	5	5	5	5
>ENSSSCP00000004185	14	0.822911	0.04524	EPS15	none	epidermal growth factor receptor pathway substrate 15 [Source:HGNC Symbol;Acc:3419]|6|ENSSSCG00000003872|ENSSSCT00000004284	502387	599978	457294	486973	465303	413420	402980	463272	385632	371048	411629	445959	19.1946	18.8028	18.8935	18.8278	18.6203	18.8215	18.5569	18.5012	18.651	18.7666	9	12	11	12	7	7	11	11	13	14	12	13	14	14	14	14	14	14	14	14	14
>ENSSSCP00000014524	10	0.823236	0.000397106	EIF3G	none	eukaryotic translation initiation factor 3, subunit G [Source:HGNC Symbol;Acc:3274]|2|ENSSSCG00000013661|ENSSSCT00000014925	1.00939e+06	965445	1.04868e+06	994070	1.02938e+06	830970	808489	825359	828064	863042	839040	821825	19.8808	20.0001	19.923	19.9733	19.6249	19.6547	19.6594	19.7191	19.6784	19.6485	8	11	9	8	6	7	9	11	9	10	11	8	10	10	10	10	10	10	10	10	10
>ENSSSCP00000003461	16	0.823435	0.0138068	PRMT1	none	protein arginine methyltransferase 1 [Source:HGNC Symbol;Acc:5187]|6|ENSSSCG00000003189|ENSSSCT00000003544	1.11862e+06	1.26368e+06	1.01686e+06	1.10627e+06	1.08766e+06	921109	855096	1.01622e+06	942525	847588	891757	973465	20.2692	19.9557	20.0773	20.0528	19.7057	19.9548	19.8462	19.693	19.7663	19.8928	15	17	13	15	11	11	12	15	13	15	16	15	16	16	16	16	16	16	16	16	16
>ENSSSCP00000007085	2	0.824129	0.0158498	CERS2	none	ceramide synthase 2 [Source:HGNC Symbol;Acc:14076]|4|ENSSSCG00000006644|ENSSSCT00000007280	32834	35284.2	29583.7	30981.5	35486.5	27059.5	29301.3	26827	26781.9	28520.5	26154.6	24771.4	15.1067	14.8525	14.9191	15.115	14.8387	14.7114	14.709	14.7997	14.6748	14.5964	3	2	2	2	1	1	2	2	1	2	2	2	2	2	2	2	2	2	2	2	2
>ENSSSCP00000020690	9	0.824596	0.0264155	STAU1	none	Uncharacterized protein [Source:UniProtKB/TrEMBL;Acc:I3L9H8]|17|ENSSSCG00000027444|ENSSSCT00000022958	143859	128223	138412	164999	143800	118625	121846	119407	124705	108912	128123	108759	16.9683	17.0786	17.3321	17.1337	16.8947	16.8655	16.9282	16.7328	16.9672	16.7308	5	8	8	7	3	3	9	9	8	8	7	9	9	9	9	9	9	9	9	9	9
>ENSSSCP00000014276	4	0.825559	0.047453	CIRBP	none	cold inducible RNA binding protein [Source:HGNC Symbol;Acc:1982]|2|ENSSSCG00000013427|ENSSSCT00000014671	600998	496992	632085	619024	655891	496159	465856	467777	553318	507481	531888	450635	18.9229	19.2698	19.2396	19.3231	18.8295	18.8355	19.0778	18.953	19.0208	18.7816	4	4	4	4	3	3	3	3	4	4	4	4	4	4	4	4	4	4	4	4	4
>ENSSSCP00000006060	9	0.825745	0.000288488	SET	none	SET nuclear oncogene [Source:HGNC Symbol;Acc:10760]|1|ENSSSCG00000005656|ENSSSCT00000006219	2.50196e+06	2.52161e+06	2.51549e+06	2.45164e+06	2.5191e+06	2.06598e+06	1.96773e+06	2.30167e+06	1.99677e+06	1.99176e+06	2.10409e+06	2.03387e+06	21.2659	21.2624	21.2253	21.2645	20.9081	21.1343	20.9292	20.9256	21.0048	20.9558	7	9	8	8	6	5	8	7	8	8	9	9	9	9	9	9	9	9	9	9	9
>ENSSSCP00000010645	5	0.826371	0.0146262	EWSR1	none	EWS RNA-binding protein 1 [Source:HGNC Symbol;Acc:3508]|14|ENSSSCG00000009974|ENSSSCT00000010930	682536	628370	696106	757846	647820	564027	447613	593699	598080	579252	583251	582269	19.2613	19.4089	19.5315	19.3052	18.7719	19.1794	19.19	19.1438	19.1538	19.1513	2	4	4	4	2	2	2	5	4	4	5	3	5	5	5	5	5	5	5	5	5
>ENSSSCP00000025295	41	0.826441	0.0280747	EIF4G1	none	eukaryotic translation initiation factor 4 gamma, 1 [Source:HGNC Symbol;Acc:3296]|13|ENSSSCG00000030255|ENSSSCT00000026490	3.47933e+06	3517131	3215110	3.1808e+06	4.00426e+06	2.87546e+06	3194328	2.78044e+06	2.98744e+06	2.58061e+06	2.78013e+06	2.9298e+06	21.746	21.6164	21.601	21.9331	21.6071	21.4069	21.5105	21.2993	21.4067	21.4824	36	41	38	41	30	30	35	36	39	42	41	40	41	41	41	41	41	41	41	41	41
>ENSSSCP00000011028	9	0.827254	0.0352526	FAM213A	none	family with sequence similarity 213, member A [Source:HGNC Symbol;Acc:28651]|14|ENSSSCG00000010340|ENSSSCT00000011320	1.15771e+06	1272898	1.049e+06	1043063	1.26587e+06	957720	1.06456e+06	970700	956171	882715	915890	956285	20.2797	20.0006	19.9924	20.2717	20.0218	19.8887	19.8669	19.7516	19.8048	19.8671	8	8	8	8	6	7	9	9	8	9	7	8	9	9	9	9	9	9	9	9	9
>ENSSSCP00000009051	7	0.827308	0.00349337	SRSF7	none	serine/arginine-rich splicing factor 7 [Source:HGNC Symbol;Acc:10789]|3|ENSSSCG00000008484|ENSSSCT00000009286	956227	944878	960635	945681	973713	791094	752984	702292	884708	738549	793855	874177	19.8498	19.8736	19.851	19.8931	19.5223	19.4217	19.7548	19.4943	19.5985	19.7376	7	6	7	7	5	6	5	6	7	7	7	7	7	7	7	7	7	7	7	7	7
>ENSSSCP00000018460	24	0.827324	0.00714886	ACLY	none	ATP citrate lyase [Source:HGNC Symbol;Acc:115]|12|ENSSSCG00000017421|ENSSSCT00000018965	2.3825e+06	2.58928e+06	2.26869e+06	2.19406e+06	2.47795e+06	1.9711e+06	2.01523e+06	2.15422e+06	1.83455e+06	1860745	1.8647e+06	2.09714e+06	21.3041	21.1134	21.0652	21.2407	20.9425	21.0387	20.807	20.8274	20.8305	21	22	22	20	23	19	19	21	23	23	22	23	22	24	24	24	24	24	24	24	24	24
>ENSSSCP00000023705	6	0.828143	0.0211077	KIF2A	none	kinesin heavy chain member 2A [Source:HGNC Symbol;Acc:6318]|GL896294.1|ENSSSCG00000030186|ENSSSCT00000032036	136360	154180	123231	134680	133348	112925	122278	110615	114737	110246	108152	111524	17.2343	16.911	17.0392	17.0248	16.8998	16.7552	16.808	16.7504	16.7227	16.767	7	6	6	6	5	6	4	7	6	7	7	7	6	6	6	6	6	6	6	6	6
>ENSSSCP00000020870	4	0.828175	0.0324901	TMEM165	none	transmembrane protein 165 [Source:HGNC Symbol;Acc:30760]|8|ENSSSCG00000023731|ENSSSCT00000024700	115388	117910	121937	99722.3	121982	95561.3	109257	101840	73988.2	89384	103090	95808.1	16.8473	16.8958	16.6056	16.8963	16.7374	16.636	16.175	16.4477	16.6535	16.5479	4	3	3	4	1	1	3	2	2	4	4	4	4	4	4	4	4	4	4	4	4
>ENSSSCP00000015252	33	0.829712	0.00692323	HSPA9	none	Stress-70 protein, mitochondrial; Uncharacterized protein [Source:UniProtKB/TrEMBL;Acc:F1RGJ3]|2|ENSSSCG00000014338|ENSSSCT00000015665	7377772	7007015	7.65326e+06	6.95733e+06	7893488	6.12143e+06	6.51045e+06	6129527	7.20113e+06	5809672	5.58653e+06	5.49125e+06	22.7404	22.8676	22.7301	22.9122	22.6343	22.5473	22.7798	22.47	22.4135	22.3887	31	32	31	32	27	26	32	31	30	33	31	30	33	33	33	33	33	33	33	33	33
>ENSSSCP00000004354	8	0.829795	0.0365805	QKI	none	QKI, KH domain containing, RNA binding [Source:HGNC Symbol;Acc:21100]|1|ENSSSCG00000004029|ENSSSCT00000004455	478968	424489	453184	545269	492928	397445	325770	446486	408781	417336	428315	357983	18.6954	18.7897	19.0566	18.911	18.3135	18.7683	18.641	18.6709	18.7083	18.4495	5	8	6	5	4	5	6	5	6	7	8	8	8	8	8	8	8	8	8	8	8
>ENSSSCP00000026826	11	0.830265	0.0017086	FKBP9	none	FK506 binding protein 9, 63 kDa [Source:HGNC Symbol;Acc:3725]|18|ENSSSCG00000021250|ENSSSCT00000029905	683003	723285	671236	683266	654226	567074	517827	619745	614084	561666	509253	579868	19.4642	19.3565	19.3821	19.3194	18.9821	19.2413	19.2281	19.0994	18.958	19.1454	11	13	11	11	8	8	9	9	10	11	10	10	11	11	11	11	11	11	11	11	11
>ENSSSCP00000010342	7	0.830731	0.0493489	KIF13B	none	kinesin family member 13B [Source:HGNC Symbol;Acc:14405]|14|ENSSSCG00000009683|ENSSSCT00000010618	67454.2	66188.7	70445.5	62350	70832.5	56036.3	58429.6	43008.8	54310.4	51044.4	76127.2	53297.2	16.0143	16.1042	15.9281	16.1121	15.8344	15.3923	15.7289	15.6395	16.2161	15.7018	4	8	6	4	0	2	3	2	5	8	6	6	7	7	7	7	7	7	7	7	7
>ENSSSCP00000001827	13	0.831841	0.0140208	XPO5	none	Uncharacterized protein [Source:UniProtKB/TrEMBL;Acc:F1RRK9]|7|ENSSSCG00000001679|ENSSSCT00000001874	507284	527378	503943	449101	548713	421979	420703	428131	368716	408527	434856	470941	19.0085	18.9429	18.7767	19.0657	18.6824	18.7077	18.4922	18.6401	18.7302	18.8452	32	32	24	33	22	20	27	27	28	31	30	34	13	13	13	13	13	13	13	13	13
>ENSSSCP00000018895	7	0.832359	0.0418381	CLUH	none	clustered mitochondria (cluA/CLU1) homolog [Source:HGNC Symbol;Acc:29094]|12|ENSSSCG00000017835|ENSSSCT00000019410	57593.9	60939.5	59603.3	57225	52607.7	47938.8	57896.7	36232.4	42261.6	47264	55195.8	48782.2	15.8951	15.8631	15.8044	15.683	15.8212	15.145	15.3671	15.5285	15.7523	15.5741	2	3	6	2	0	1	0	2	3	7	7	2	7	7	7	7	7	7	7	7	7
>ENSSSCP00000004246	11	0.832535	0.0316322	RPS8	none	ribosomal protein S8 [Source:HGNC Symbol;Acc:10441]|6|ENSSSCG00000003930|ENSSSCT00000004346	6.34483e+06	6433206	7010587	6473755	5.46179e+06	5.2823e+06	5.29307e+06	5.0607e+06	5.67174e+06	5.25452e+06	4.42398e+06	5.98978e+06	22.6171	22.7411	22.6262	22.3809	22.3357	22.2709	22.4354	22.3251	22.0769	22.5141	10	10	11	10	8	10	10	10	10	11	10	11	11	11	11	11	11	11	11	11	11
>ENSSSCP00000012376	30	0.833731	0.0152914	RPN1	none	ribophorin I [Source:HGNC Symbol;Acc:10381]|13|ENSSSCG00000011612|ENSSSCT00000012709	4.57389e+06	4993751	4.3611e+06	4195005	4745720	3.8134e+06	4.02735e+06	3.69348e+06	3.70654e+06	3.8044e+06	3.83412e+06	3814499	22.2517	22.0563	22.0002	22.1782	21.9414	21.8165	21.8216	21.8592	21.8705	21.8631	30	28	28	29	27	28	29	27	27	29	28	29	30	30	30	30	30	30	30	30	30
>ENSSSCP00000002653	2	0.834118	0.0148784	LGMN	none	Uncharacterized protein [Source:UniProtKB/TrEMBL;Acc:F1SD70]|7|ENSSSCG00000002452|ENSSSCT00000002722	159657	169386	145816	173474	149950	133172	132798	135848	141820	117313	129337	141918	17.37	17.1538	17.4044	17.1941	17.0189	17.0516	17.1137	16.84	16.9808	17.1147	4	4	4	4	4	3	3	4	3	4	4	4	2	2	2	2	2	2	2	2	2
>ENSSSCP00000000399	34	0.835252	0.020534	ESYT1	none	extended synaptotagmin-like protein 1 [Source:HGNC Symbol;Acc:29534]|5|ENSSSCG00000000379|ENSSSCT00000000405	1.85483e+06	1.99027e+06	1.78707e+06	1.6552e+06	1.98678e+06	1.54925e+06	1.61572e+06	1.5255e+06	1.46288e+06	1.50037e+06	1.53277e+06	1658265	20.9245	20.7692	20.6586	20.922	20.6237	20.5408	20.4804	20.5169	20.5477	20.6612	32	32	31	33	26	23	31	33	32	31	35	33	34	34	34	34	34	34	34	34	34
>ENSSSCP00000012455	7	0.835326	0.000447932	U2SURP	none	U2 snRNP-associated SURP domain containing [Source:HGNC Symbol;Acc:30855]|13|ENSSSCG00000011684|ENSSSCT00000012792	245369	247028	231800	254385	248262	204963	228829	202070	206498	192136	196857	203388	17.9143	17.8225	17.9567	17.9215	17.8039	17.6245	17.6558	17.5518	17.5868	17.6339	5	5	4	7	2	2	5	3	4	5	6	4	7	7	7	7	7	7	7	7	7
>ENSSSCP00000014920	3	0.836119	0.00147731	NHP2	none	NHP2 ribonucleoprotein [Source:HGNC Symbol;Acc:14377]|2|ENSSSCG00000014032|ENSSSCT00000015328	143512	148695	132878	146984	145493	119993	124228	114474	119273	114319	120801	126866	17.182	17.0197	17.1653	17.1506	16.9226	16.8047	16.8639	16.8027	16.8823	16.9529	3	4	3	3	3	3	3	3	4	4	4	3	3	3	3	3	3	3	3	3	3
>ENSSSCP00000023011	7	0.8373	0.0182908	SLC12A4	none	solute carrier family 12 (potassium/chloride transporter), member 4 [Source:HGNC Symbol;Acc:10913]|GL896204.1|ENSSSCG00000028609|ENSSSCT00000029325	77598.3	77044.4	76892.8	76792.7	79663.3	64973	56590.6	55907.7	66754.4	61361.7	70988.7	78235.1	16.2334	16.2306	16.2287	16.2816	15.7883	15.7708	16.0266	15.9051	16.1153	16.2555	5	7	6	6	0	2	4	5	5	6	6	5	7	7	7	7	7	7	7	7	7
>ENSSSCP00000012614	14	0.837736	0.0017383	PAK2	none	|13|ENSSSCG00000011843|ENSSSCT00000012955	657521	614746	694390	676291	644659	550829	576494	491734	582499	551604	543216	559428	19.2296	19.4054	19.3673	19.2982	19.1369	18.9075	19.1519	19.0733	19.0512	19.0936	14	15	14	15	11	11	14	15	14	14	15	15	14	14	14	14	14	14	14	14	14
>ENSSSCP00000010455	17	0.837751	9.61596e-05	CLIP1	none	CAP-GLY domain containing linker protein 1 [Source:HGNC Symbol;Acc:10461]|14|ENSSSCG00000009793|ENSSSCT00000010735	257981	258775	265337	246792	261019	216124	206346	215323	224748	217173	216977	216174	17.9813	18.0175	17.9129	17.9938	17.6547	17.7161	17.7779	17.7285	17.7272	17.7218	9	15	12	12	3	6	12	8	10	20	15	8	17	17	17	17	17	17	17	17	17
>ENSSSCP00000018749	13	0.837776	0.0156427	ACACA	none	acetyl-CoA carboxylase alpha [Source:HGNC Symbol;Acc:84]|12|ENSSSCG00000017694|ENSSSCT00000019259	279942	305433	269285	255270	289779	234528	224354	238949	248535	232588	229548	233196	18.2205	18.0388	17.9617	18.1446	17.7754	17.8663	17.9231	17.8274	17.8084	17.8312	12	12	11	12	3	5	10	6	13	12	13	15	13	13	13	13	13	13	13	13	13
>ENSSSCP00000013721	6	0.837924	0.0157407	AIP	none	aryl hydrocarbon receptor interacting protein [Source:HGNC Symbol;Acc:358]|2|ENSSSCG00000012904|ENSSSCT00000014107	135068	128593	134211	145256	132214	113177	90583.5	121791	120450	114884	127298	104056	16.9724	17.0341	17.1482	17.0125	16.467	16.894	16.8781	16.8098	16.9579	16.667	5	4	5	4	2	4	3	5	5	6	5	3	6	6	6	6	6	6	6	6	6
>ENSSSCP00000014722	10	0.838933	0.0331429	TPM4	none	Sus scrofa tropomyosin 4 (TPM4), mRNA. [Source:RefSeq mRNA;Acc:NM_214335]|2|ENSSSCG00000013849|ENSSSCT00000015127	5330940	5275448	5.70676e+06	4954228	5.38732e+06	4.4723e+06	3.69664e+06	5116527	3.7958e+06	4.11591e+06	5.16013e+06	4948809	22.3309	22.4442	22.2402	22.3611	21.8178	22.2867	21.856	21.9728	22.299	22.2386	8	10	9	9	8	9	8	8	8	11	11	10	10	10	10	10	10	10	10	10	10
>ENSSSCP00000021460	6	0.839368	0.00935767	TRA2B	none	transformer 2 beta homolog (Drosophila) [Source:HGNC Symbol;Acc:10781]|GL894584.1|ENSSSCG00000030225|ENSSSCT00000025696	475609	469827	433657	520635	478319	399211	392475	417445	452084	376566	376245	380452	18.8418	18.7262	18.9899	18.8676	18.5822	18.6712	18.7862	18.5225	18.5213	18.5374	6	7	7	6	5	5	4	5	7	7	7	7	6	6	6	6	6	6	6	6	6
>ENSSSCP00000025724	5	0.840534	0.0288685	BZW2	none	basic leucine zipper and W2 domains 2 [Source:HGNC Symbol;Acc:18808]|9|ENSSSCG00000023118|ENSSSCT00000030703	77725.1	84149	73036	70421.4	83294.1	65330.6	75532.3	66594.1	65221.7	59809.2	54458.1	70368.2	16.3607	16.1563	16.1037	16.3459	16.2048	16.0231	15.9931	15.8681	15.7329	16.1026	3	3	1	3	2	2	2	3	2	5	5	4	5	5	5	5	5	5	5	5	5
>ENSSSCP00000023834	2	0.840706	0.000589186	RPL29	none	Sus scrofa ribosomal protein L29 (RPL29), mRNA. [Source:RefSeq mRNA;Acc:NM_213950]|13|ENSSSCG00000027573|ENSSSCT00000027316	1.55887e+06	1.63059e+06	1.50018e+06	1534525	1.57018e+06	1.31055e+06	1351829	1.3634e+06	1407125	1.20935e+06	1.20935e+06	1.32225e+06	20.637	20.5167	20.5494	20.5825	20.3665	20.3788	20.4243	20.2058	20.2058	20.3346	2	2	2	2	2	2	2	2	2	2	2	2	2	2	2	2	2	2	2	2	2
>ENSSSCP00000026859	5	0.841319	0.000588502	SRSF2	none	serine/arginine-rich splicing factor 2 [Source:RefSeq peptide;Acc:NP_001070697]|12|ENSSSCG00000023148|ENSSSCT00000025710	573307	545762	596752	591691	559023	482334	444584	489255	486937	479873	506328	487026	19.0579	19.1868	19.1745	19.0925	18.7621	18.9002	18.8934	18.8723	18.9497	18.8936	5	5	5	5	5	5	5	5	5	5	5	5	5	5	5	5	5	5	5	5	5
>ENSSSCP00000014781	5	0.841616	0.0461946	IFI30	none	Sus scrofa interferon, gamma-inducible protein 30 (IFI30), mRNA. [Source:RefSeq mRNA;Acc:NM_001131046]|2|ENSSSCG00000013901|ENSSSCT00000015187	396265	351550	404563	455438	373510	333503	291918	343121	350354	360125	348556	306945	18.4234	18.626	18.7969	18.5108	18.1552	18.3884	18.4185	18.4581	18.411	18.2276	3	5	5	4	2	3	4	4	6	4	5	5	5	5	5	5	5	5	5	5	5
>ENSSSCP00000026803	10	0.843534	0.045707	NDUFV3	none	NADH dehydrogenase (ubiquinone) flavoprotein 3, 10kDa [Source:HGNC Symbol;Acc:7719]|13|ENSSSCG00000021991|ENSSSCT00000025887	466168	394440	495158	484297	490778	393229	368616	388210	413342	399109	423873	366223	18.5894	18.9175	18.8855	18.9047	18.4918	18.5665	18.657	18.6064	18.6933	18.4824	10	11	10	8	7	8	10	11	9	11	10	8	10	10	10	10	10	10	10	10	10
>ENSSSCP00000004101	2	0.844459	0.00172806	SRSF11	none	Sus scrofa serine/arginine-rich splicing factor 11 (SRSF11), mRNA. [Source:RefSeq mRNA;Acc:NM_001044587]|6|ENSSSCG00000003791|ENSSSCT00000004195	121846	125069	115548	126559	120209	102894	106447	110507	107750	89762.2	102814	100085	16.9324	16.8181	16.9495	16.8752	16.6998	16.7538	16.7173	16.4538	16.6497	16.6109	1	2	1	2	1	1	2	1	2	2	2	2	2	2	2	2	2	2	2	2	2
>ENSSSCP00000003887	2	0.845149	0.0112209	RPA2	none	replication protein A2, 32kDa [Source:HGNC Symbol;Acc:10290]|6|ENSSSCG00000003583|ENSSSCT00000003978	50532.1	51870.4	49099.1	54969.7	46189.2	42707.2	38708.8	48506.6	44104	42715	41439.9	40768.7	15.6626	15.5834	15.7463	15.4953	15.2404	15.5659	15.4286	15.3825	15.3387	15.3152	2	2	3	2	1	2	2	2	2	3	3	2	2	2	2	2	2	2	2	2	2
>ENSSSCP00000011962	12	0.845509	0.0305451	TOP2B	none	DNA topoisomerase 2 [Source:UniProtKB/TrEMBL;Acc:F1RS45]|13|ENSSSCG00000011213|ENSSSCT00000012279	134897	142753	138249	120660	137923	114056	141092	97074.4	106018	116013	103693	120448	17.1232	17.0769	16.8806	17.0735	17.1063	16.5668	16.6939	16.8239	16.662	16.878	9	17	10	18	9	8	14	9	13	19	15	14	12	12	12	12	12	12	12	12	12
>ENSSSCP00000023248	6	0.845919	0.0147938	SNRPD2	none	small nuclear ribonucleoprotein D2 polypeptide 16.5kDa [Source:HGNC Symbol;Acc:11159]|GL896302.1|ENSSSCG00000025813|ENSSSCT00000032366	845274	927110	797144	851567	805274	715034	690532	830616	730954	601577	731178	705345	19.8224	19.6045	19.6998	19.6191	19.3973	19.6638	19.4794	19.1984	19.4799	19.428	5	5	6	6	6	5	6	5	5	5	5	5	6	6	6	6	6	6	6	6	6
>ENSSSCP00000013941	16	0.847635	0.000239206	PRPF19	none	Sus scrofa PRP19/PSO4 pre-mRNA processing factor 19 homolog (S. cerevisiae) (PRPF19), mRNA. [Source:RefSeq mRNA;Acc:NM_001128457]|2|ENSSSCG00000013107|ENSSSCT00000014327	1.0044e+06	966621	994298	1.03424e+06	1.02243e+06	851363	863100	893641	882411	799211	877697	792118	19.8826	19.9233	19.9801	19.9636	19.7192	19.7693	19.7511	19.6082	19.7434	19.5954	15	14	12	14	7	8	13	13	11	16	14	14	16	16	16	16	16	16	16	16	16
>ENSSSCP00000027076	11	0.847665	0.0118185	AK2	none	adenylate kinase 2 [Source:HGNC Symbol;Acc:362]|GL894826.2|ENSSSCG00000024355|ENSSSCT00000030814	618501	586215	577656	676902	633229	524282	453665	510032	540148	523615	548884	569344	19.1611	19.1399	19.3686	19.2724	18.7913	18.9602	19.043	18.9981	19.0661	19.1189	8	11	10	9	6	7	7	8	10	11	11	8	11	11	11	11	11	11	11	11	11
>ENSSSCP00000001093	5	0.847942	0.000380425	SSR1	none	signal sequence receptor, alpha [Source:HGNC Symbol;Acc:11323]|7|ENSSSCG00000001022|ENSSSCT00000001115	1.04238e+06	1.0351e+06	1.03929e+06	1.00749e+06	1.08764e+06	883877	953850	866212	923927	809355	878179	871742	19.9813	19.9872	19.9423	20.0528	19.8634	19.7244	19.8174	19.6264	19.7442	19.7335	4	5	4	4	3	4	3	4	3	5	5	5	5	5	5	5	5	5	5	5	5
>ENSSSCP00000002919	21	0.848043	4.02622e-05	KARS	none	lysyl-tRNA synthetase [Source:HGNC Symbol;Acc:6215]|6|ENSSSCG00000002704|ENSSSCT00000002998	999750	1.00639e+06	1.00432e+06	998104	990189	847832	864575	872734	876537	801751	837861	833530	19.9408	19.9378	19.9288	19.9173	19.7216	19.7352	19.7415	19.6128	19.6764	19.6689	19	18	18	18	16	16	17	19	18	20	17	18	21	21	21	21	21	21	21	21	21
>ENSSSCP00000025087	8	0.848667	0.00102083	NOMO1	none	Uncharacterized protein [Source:UniProtKB/TrEMBL;Acc:I3LLW7]|JH118682.1|ENSSSCG00000025565|ENSSSCT00000030288	173295	168427	165383	176984	182385	147069	146602	134162	158811	146990	150336	145517	17.3618	17.3355	17.4333	17.4766	17.1615	17.0336	17.277	17.1654	17.1978	17.1508	4	6	5	5	4	4	7	6	5	8	7	6	8	8	8	8	8	8	8	8	8
>ENSSSCP00000023888	50	0.849077	0.0421362	EEF2	none	eukaryotic translation elongation factor 2 [Source:HGNC Symbol;Acc:3214]|2|ENSSSCG00000025675|ENSSSCT00000031794	48878233	55169984	44751512	44746948	50844488	4.15014e+07	41192856	47859396	38960344	38631084	38309544	44055216	25.7174	25.4154	25.4153	25.5996	25.2959	25.5123	25.2155	25.2033	25.1912	25.3928	49	49	48	49	47	45	48	49	49	48	50	47	50	50	50	50	50	50	50	50	50
>ENSSSCP00000005777	3	0.84933	0.0213139	SEC61B	none	Sec61 beta subunit [Source:HGNC Symbol;Acc:16993]|1|ENSSSCG00000005384|ENSSSCT00000005924	423814	451396	395997	389418	458446	359958	384484	389650	358691	327963	332987	365974	18.784	18.5951	18.571	18.8064	18.5526	18.5718	18.4524	18.3232	18.3451	18.4814	3	3	3	3	2	2	3	3	3	3	3	3	3	3	3	3	3	3	3	3	3
>ENSSSCP00000000930	7	0.849418	0.0213125	ARL1	none	Sus scrofa ADP-ribosylation factor-like 1 (ARL1), mRNA. [Source:RefSeq mRNA;Acc:NM_001031784]|5|ENSSSCG00000000870|ENSSSCT00000000950	250714	255397	220420	263727	263310	212961	203133	226352	199297	198948	231510	218524	17.9624	17.7499	18.0087	18.0064	17.6321	17.7882	17.6046	17.602	17.8207	17.7374	4	5	3	6	3	3	5	4	7	8	6	5	7	7	7	7	7	7	7	7	7
>ENSSSCP00000027288	7	0.849852	0.000297624	COPE	none	Uncharacterized protein [Source:UniProtKB/TrEMBL;Acc:F1S7E0]|2|ENSSSCG00000027840|ENSSSCT00000027115	527965	538097	508185	521285	544294	448692	431470	491171	448832	459471	422967	438244	19.0375	18.955	18.9917	19.054	18.7189	18.9059	18.7758	18.8096	18.6902	18.7414	10	11	11	11	9	10	10	12	11	11	12	12	7	7	7	7	7	7	7	7	7
>ENSSSCP00000015563	9	0.850702	0.00544872	PRKCDBP	none	protein kinase C, delta binding protein [Source:HGNC Symbol;Acc:9400]|9|ENSSSCG00000014633|ENSSSCT00000015984	490872	524794	458142	474411	506139	417586	417768	471667	409697	397676	394036	414671	19.0014	18.8054	18.8558	18.9492	18.6723	18.8474	18.6442	18.6012	18.588	18.6616	7	8	8	8	5	5	8	7	9	9	9	10	9	9	9	9	9	9	9	9	9
>ENSSSCP00000025866	4	0.853087	0.00198953	MDH2	none	Sus scrofa malate dehydrogenase 2, NAD (mitochondrial) (MDH2), nuclear gene encoding mitochondrial protein, mRNA. [Source:RefSeq mRNA;Acc:NM_001244153]|3|ENSSSCG00000025486|ENSSSCT00000028089	1.89113e+06	1860323	1.83626e+06	1.9884e+06	1.87954e+06	1.6133e+06	1.4042e+06	1.74516e+06	1591313	1.6512e+06	1.63113e+06	1.65677e+06	20.8271	20.8083	20.9232	20.8419	20.4213	20.7349	20.6018	20.6551	20.6374	20.6599	21	21	20	20	19	19	19	21	20	21	20	19	4	4	4	4	4	4	4	4	4
>ENSSSCP00000005557	5	0.853471	0.0188404	RPS6	none	ribosomal protein S6 [Source:HGNC Symbol;Acc:10429]|1|ENSSSCG00000005169|ENSSSCT00000005698	2.05479e+06	2.02027e+06	2.12083e+06	2151461	1.92661e+06	1.75371e+06	1.78733e+06	1.70566e+06	1.8942e+06	1.63214e+06	1.45976e+06	2.04315e+06	20.9461	21.0162	21.0369	20.8776	20.7694	20.7019	20.8532	20.6383	20.4773	20.9624	10	10	10	10	9	9	10	10	10	10	10	9	5	5	5	5	5	5	5	5	5
>ENSSSCP00000010699	7	0.853605	0.00027787	DRG1	none	developmentally regulated GTP binding protein 1 [Source:HGNC Symbol;Acc:3029]|14|ENSSSCG00000010029|ENSSSCT00000010986	172678	179187	168345	168002	175177	147398	158240	146932	140078	148954	138311	151875	17.4511	17.3611	17.3581	17.4185	17.2718	17.1648	17.0959	17.1845	17.0776	17.2125	5	6	6	5	3	5	6	4	5	5	7	5	7	7	7	7	7	7	7	7	7
>ENSSSCP00000024896	2	0.854193	0.0255978	EIF5	none	eukaryotic translation initiation factor 5 [Source:HGNC Symbol;Acc:3299]|GL894184.2|ENSSSCG00000027421|ENSSSCT00000029757	64812.3	72189.5	63396.5	58695.8	64967.2	55362.2	56620.9	54485.8	58737.8	51695.6	52366.3	58266.6	16.1395	15.9521	15.841	15.9874	15.789	15.7336	15.842	15.6578	15.6764	15.8304	1	2	2	2	1	1	1	1	2	2	2	1	2	2	2	2	2	2	2	2	2
>ENSSSCP00000027633	2	0.854206	0.0259658	DPP7	none	dipeptidyl-peptidase 7 [Source:HGNC Symbol;Acc:14892]|GL896476.1|ENSSSCG00000027350|ENSSSCT00000030975	36539.4	37083.1	37614.7	32340.4	39119.4	31212.2	31061	29854.1	33330.3	30382.8	31013.6	31631.2	15.1785	15.199	14.9811	15.2556	14.9228	14.8656	15.0245	14.891	14.9206	14.9491	2	2	1	2	2	1	1	2	2	2	2	2	2	2	2	2	2	2	2	2	2
>ENSSSCP00000001683	5	0.854459	0.0150656	FKBP5	none	Uncharacterized protein [Source:UniProtKB/TrEMBL;Acc:F1RYY0]|7|ENSSSCG00000001549|ENSSSCT00000001727	53849.7	55650.3	49355.9	53906.3	56486.1	46012.3	47909.6	37798.8	46995.4	46505.9	45399.6	51464.6	15.7641	15.5909	15.7182	15.7856	15.548	15.2061	15.5202	15.5051	15.4704	15.6513	3	4	5	3	2	3	4	2	4	4	3	5	5	5	5	5	5	5	5	5	5
>ENSSSCP00000007329	16	0.855421	0.00477872	PALMD	none	palmdelphin [Source:HGNC Symbol;Acc:15846]|4|ENSSSCG00000006874|ENSSSCT00000007528	1.46592e+06	1.3727e+06	1.44644e+06	1.5493e+06	1.49525e+06	1.25398e+06	1.19765e+06	1.28466e+06	1.27401e+06	1.24981e+06	1.23769e+06	1.28006e+06	20.3886	20.4641	20.5632	20.512	20.1918	20.293	20.2809	20.2533	20.2392	20.2878	13	18	15	15	10	14	13	14	14	17	16	13	16	16	16	16	16	16	16	16	16
>ENSSSCP00000012257	16	0.855847	0.000227174	SUCLG2	none	succinate-CoA ligase, GDP-forming, beta subunit [Source:HGNC Symbol;Acc:11450]|13|ENSSSCG00000011501|ENSSSCT00000012586	1.05283e+06	1.06943e+06	1.01688e+06	1.04116e+06	1083837	901059	898513	954973	943504	836501	871600	901260	20.0284	19.9557	19.9898	20.0477	19.7772	19.8651	19.8477	19.674	19.7333	19.7816	13	16	14	14	11	13	13	13	14	16	16	14	16	16	16	16	16	16	16	16	16
>ENSSSCP00000020152	5	0.85603	0.0238475	UNC119B	none	unc-119 homolog B (C. elegans) [Source:HGNC Symbol;Acc:16488]|14|ENSSSCG00000020716|ENSSSCT00000028269	85342.9	82449.6	85759.3	90995.9	82166.8	73056.1	60231.5	70734.5	85569.9	73696.4	80015.7	68088.6	16.3312	16.388	16.4735	16.3263	15.8782	16.1101	16.3848	16.1693	16.288	16.0551	3	5	5	3	0	2	3	3	4	5	5	4	5	5	5	5	5	5	5	5	5
>ENSSSCP00000008332	24	0.856214	0.00974576	TUFM	none	Tu translation elongation factor, mitochondrial [Source:HGNC Symbol;Acc:12420]|3|ENSSSCG00000007803|ENSSSCT00000008551	2.66245e+06	2458300	2636975	2.87789e+06	2.67662e+06	2.27963e+06	2191907	2.20033e+06	2.45051e+06	2.25437e+06	2.27932e+06	2.30132e+06	21.2292	21.3305	21.4566	21.352	21.0638	21.0693	21.2246	21.1043	21.1202	21.134	22	25	22	23	19	20	21	20	24	22	25	22	24	24	24	24	24	24	24	24	24
>ENSSSCP00000023695	16	0.857061	0.0465269	DHX9	none	Uncharacterized protein [Source:UniProtKB/TrEMBL;Acc:I3LHZ6]|GL892421.2|ENSSSCG00000026806|ENSSSCT00000025297	1.95935e+06	2.20826e+06	1.77231e+06	1.82941e+06	2.02744e+06	1.67929e+06	1.82795e+06	1.80385e+06	1.56879e+06	1.57432e+06	1.6386e+06	1.66219e+06	21.0745	20.7572	20.8029	20.9512	20.8018	20.7826	20.5812	20.5863	20.644	20.6647	48	50	46	48	41	40	46	47	48	49	51	47	16	16	16	16	16	16	16	16	16
>ENSSSCP00000004051	10	0.858212	0.00326094	GALNT1	none	UDP-N-acetyl-alpha-D-galactosamine:polypeptide N-acetylgalactosaminyltransferase 1 (GalNAc-T1) [Source:HGNC Symbol;Acc:4123]|6|ENSSSCG00000003743|ENSSSCT00000004144	190776	194276	193468	176478	198883	163727	171357	173373	167116	162563	152374	155576	17.5677	17.5617	17.4291	17.6016	17.3866	17.4035	17.3505	17.3106	17.2173	17.2473	7	9	6	8	5	4	9	9	8	7	8	8	10	10	10	10	10	10	10	10	10
>ENSSSCP00000000306	5	0.858297	0.0265834	COPZ1	none	coatomer protein complex, subunit zeta 1 [Source:HGNC Symbol;Acc:2243]|5|ENSSSCG00000000290|ENSSSCT00000000311	348208	382758	318509	331631	359933	298866	306675	303654	300433	288017	279290	315123	18.5461	18.281	18.3392	18.4574	18.2264	18.2121	18.1967	18.1358	18.0914	18.2656	4	4	4	4	3	4	3	3	4	6	4	5	5	5	5	5	5	5	5	5	5
>ENSSSCP00000003993	10	0.859687	0.0253163	EPB41L3	none	erythrocyte membrane protein band 4.1-like 3 [Source:HGNC Symbol;Acc:3380]|6|ENSSSCG00000003687|ENSSSCT00000004085	293938	318732	304769	272238	280013	252695	204341	258682	266527	258524	261546	266549	18.282	18.2174	18.0545	18.0951	17.6406	17.9808	18.0239	17.9799	17.9967	18.024	9	10	8	9	7	8	8	9	9	10	10	10	10	10	10	10	10	10	10	10	10
>ENSSSCP00000009623	7	0.860612	0.000127068	RPS3A	none	ribosomal protein S3A [Source:HGNC Symbol;Acc:10421]|8|ENSSSCG00000009019|ENSSSCT00000009878	2557689	2.55778e+06	2497841	2.54029e+06	2.63485e+06	2.20118e+06	2.23843e+06	2.09995e+06	2.3719e+06	2212626	2.16672e+06	2.11744e+06	21.2865	21.2523	21.2766	21.3293	21.0941	21.0019	21.1776	21.0773	21.0471	21.0139	14	14	14	14	13	13	14	14	14	15	15	15	7	7	7	7	7	7	7	7	7
>ENSSSCP00000027087	2	0.860954	0.00396696	SF3B3	none	Uncharacterized protein [Source:UniProtKB/TrEMBL;Acc:I3LSJ4]|GL896221.1|ENSSSCG00000025323|ENSSSCT00000030710	153580	161469	147000	146301	159551	132225	140189	135440	134117	125184	128567	129857	17.3009	17.1655	17.1586	17.2837	17.097	17.0473	17.0331	16.9337	16.9722	16.9866	0	2	2	2	1	1	2	2	2	2	2	2	2	2	2	2	2	2	2	2	2
>ENSSSCP00000021748	6	0.861084	0.00220722	POLR2C	none	polymerase (RNA) II (DNA directed) polypeptide C, 33kDa [Source:HGNC Symbol;Acc:9189]|6|ENSSSCG00000025454|ENSSSCT00000024584	167432	157379	169622	176530	166196	144173	138916	148982	152566	137367	149771	137434	17.2639	17.372	17.4296	17.3425	17.0839	17.1848	17.2191	17.0677	17.1924	17.0684	5	6	6	5	1	3	3	4	6	5	6	5	6	6	6	6	6	6	6	6	6
>ENSSSCP00000003567	8	0.861442	0.0123187	HSPBP1	none	HSPA (heat shock 70kDa) binding protein, cytoplasmic cochaperone 1 [Source:HGNC Symbol;Acc:24989]|6|ENSSSCG00000003288|ENSSSCT00000003652	193224	189636	210023	190179	183057	166451	180100	179282	149758	169346	147073	173148	17.5329	17.6802	17.537	17.4819	17.4584	17.4519	17.1923	17.3696	17.1662	17.4016	5	6	5	6	4	5	6	7	6	7	7	7	8	8	8	8	8	8	8	8	8
>ENSSSCP00000011469	9	0.86168	0.00290081	GLRX3	none	glutaredoxin 3 [Source:HGNC Symbol;Acc:15987]|14|ENSSSCG00000010759|ENSSSCT00000011771	758591	780602	729640	757436	766685	653662	602881	658116	683096	587410	699210	691262	19.5742	19.4768	19.5308	19.5483	19.2015	19.328	19.3817	19.164	19.4154	19.3989	7	9	8	9	6	6	8	8	8	9	9	9	9	9	9	9	9	9	9	9	9
>ENSSSCP00000026450	20	0.861743	0.0022031	HNRNPK	none	heterogeneous nuclear ribonucleoprotein K [Source:HGNC Symbol;Acc:5044]|10|ENSSSCG00000022760|ENSSSCT00000025854	1.3069e+07	13362355	12172458	13386192	13354797	1.12621e+07	10644471	11977986	11521598	11209077	10993381	11225923	23.6717	23.5371	23.6742	23.6709	23.3436	23.5139	23.4578	23.4182	23.3901	23.4203	18	19	19	18	16	16	19	19	19	20	19	21	20	20	20	20	20	20	20	20	20
>ENSSSCP00000019234	60	0.861795	0.00435091	AHNAK	none	AHNAK nucleoprotein [Source:HGNC Symbol;Acc:347]|2|ENSSSCG00000027969|ENSSSCT00000029753	1.46014e+07	13690243	14513941	15346548	14854953	1.25834e+07	12143902	12287395	12943373	13976699	11273052	12876200	23.7066	23.7909	23.8714	23.8244	23.5337	23.5507	23.6257	23.7365	23.4264	23.6182	56	59	57	59	45	48	54	54	57	57	58	53	60	60	60	60	60	60	60	60	60
>ENSSSCP00000008243	11	0.862731	0.036556	CLIP2	none	CAP-GLY domain containing linker protein 2 [Source:HGNC Symbol;Acc:2586]|3|ENSSSCG00000007719|ENSSSCT00000008462	112191	98295.8	115828	117048	117590	96790.3	88614.6	92423	105503	108645	98664.5	86892.5	16.5848	16.8216	16.8367	16.8434	16.4353	16.496	16.6869	16.7293	16.5902	16.4069	8	13	12	8	2	5	9	9	11	13	14	11	11	11	11	11	11	11	11	11	11
>ENSSSCP00000000803	9	0.863229	0.0248062	ERC1	none	Uncharacterized protein [Source:UniProtKB/TrEMBL;Acc:F1SHS4]|5|ENSSSCG00000000755|ENSSSCT00000000819	160282	157654	174901	145350	163222	138360	137370	136312	144948	135538	131539	144452	17.2664	17.4162	17.1492	17.3165	17.0677	17.0566	17.1452	17.0483	17.0051	17.1402	4	9	9	10	3	6	9	7	9	9	8	7	9	9	9	9	9	9	9	9	9
>ENSSSCP00000011596	25	0.864222	0.00610732	HNRNPU	none	heterogeneous nuclear ribonucleoprotein U (scaffold attachment factor A) [Source:HGNC Symbol;Acc:5048]|10|ENSSSCG00000010877|ENSSSCT00000011900	1.12027e+07	11951168	10558610	10819402	11481445	9.68158e+06	10285961	10340813	9999874	9041439	9033982	9387407	23.5106	23.3319	23.3671	23.4528	23.2942	23.3018	23.2535	23.1081	23.1069	23.1623	21	23	22	23	20	22	22	21	23	25	24	23	25	25	25	25	25	25	25	25	25
>ENSSSCP00000017562	132	0.864728	0.00500231	FLNC	none	filamin C, gamma [Source:HGNC Symbol;Acc:3756]|18|ENSSSCG00000016578|ENSSSCT00000018048	82296310	88228752	78725984	82022704	80207800	71163948	70264584	74605248	78065272	68012680	63914432	72121472	26.3947	26.2303	26.2895	26.2572	26.0663	26.1528	26.2182	26.0193	25.9296	26.1039	129	127	132	124	128	128	124	131	133	129	125	124	132	132	132	132	132	132	132	132	132
>ENSSSCP00000017033	3	0.86498	0.0105687	HSPD1	none	heat shock 60kDa protein 1 (chaperonin) [Source:HGNC Symbol;Acc:5261]|15|ENSSSCG00000016077|ENSSSCT00000017505	5.17756e+06	5003837	5.47218e+06	4813474	5420733	4.47848e+06	4.28161e+06	4.75332e+06	4.26895e+06	4496894	4596178	4473936	22.2546	22.3837	22.1986	22.3701	22.0297	22.1805	22.0254	22.1005	22.132	22.0931	30	31	30	30	29	30	30	30	31	31	31	31	3	3	3	3	3	3	3	3	3
>ENSSSCP00000016238	5	0.865914	0.0423294	CYP51A1	none	Sus scrofa cytochrome P450, family 51, subfamily A, polypeptide 1 (CYP51), mRNA. [Source:RefSeq mRNA;Acc:NM_214432]|9|ENSSSCG00000015311|ENSSSCT00000016684	147694	154749	137560	135628	162840	127891	123860	121324	137697	130884	127456	126123	17.2396	17.0697	17.0493	17.3131	16.9183	16.8885	17.0711	16.9979	16.9596	16.9445	5	9	8	6	4	6	7	7	7	8	8	9	5	5	5	5	5	5	5	5	5
>ENSSSCP00000001861	11	0.865993	0.0200427	CDC5L	none	cell division cycle 5-like [Source:HGNC Symbol;Acc:1743]|7|ENSSSCG00000001708|ENSSSCT00000001908	195250	208016	185033	206394	181558	169085	187433	179671	174003	157530	164341	151534	17.6663	17.4974	17.655	17.4701	17.516	17.455	17.4088	17.2653	17.3263	17.2093	5	7	6	6	2	3	4	2	7	6	8	6	11	11	11	11	11	11	11	11	11
>ENSSSCP00000014644	4	0.866776	0.019137	GIPC1	none	GIPC PDZ domain containing family, member 1 [Source:HGNC Symbol;Acc:1226]|2|ENSSSCG00000013774|ENSSSCT00000015049	58122.5	55622	62371.5	57669.1	56827.4	50379.2	53098.2	42195.8	57546.9	47959.6	50418.4	51056.4	15.7634	15.9286	15.8155	15.7943	15.6964	15.3648	15.8125	15.5495	15.6217	15.6398	3	4	4	4	2	2	4	1	5	4	4	3	4	4	4	4	4	4	4	4	4
>ENSSSCP00000004951	2	0.867936	0.0044969	ADAM10	ECM Regulators	ADAM metallopeptidase domain 10 [Source:HGNC Symbol;Acc:188]|1|ENSSSCG00000004594|ENSSSCT00000005075	381212	395215	371977	366604	391052	330868	355284	323917	286950	345928	331935	341194	18.5923	18.5049	18.4839	18.577	18.4386	18.3053	18.1304	18.4001	18.3405	18.3802	2	2	2	2	2	2	2	2	1	2	2	2	2	2	2	2	2	2	2	2	2
>ENSSSCP00000002715	9	0.868086	0.00630993	SETD3	none	SET domain containing 3 [Source:HGNC Symbol;Acc:20493]|7|ENSSSCG00000002508|ENSSSCT00000002786	153604	154900	142487	156810	160219	133341	129893	133545	130404	136176	139578	130453	17.241	17.1205	17.2587	17.2897	16.987	17.027	16.9926	17.0551	17.0907	16.9932	2	6	3	7	3	2	5	2	7	9	8	4	9	9	9	9	9	9	9	9	9
>ENSSSCP00000004985	13	0.868222	0.0136216	TMOD3	none	Sus scrofa tropomodulin 3 (ubiquitous) (TMOD3), mRNA. [Source:RefSeq mRNA;Acc:NM_214294]|1|ENSSSCG00000004626|ENSSSCT00000005109	804690	738410	797313	866401	816638	698650	681818	751678	651931	663144	713017	730316	19.4941	19.6048	19.7247	19.6393	19.379	19.5198	19.3144	19.339	19.4436	19.4782	14	15	14	14	6	14	13	13	13	15	15	14	13	13	13	13	13	13	13	13	13
>ENSSSCP00000028171	13	0.868808	0.00463934	PUF60	none	poly-U binding splicing factor 60KDa [Source:HGNC Symbol;Acc:17042]|GL896135.1|ENSSSCG00000028133|ENSSSCT00000029289	531503	542418	532029	498219	553348	461774	437254	421420	509733	461103	453232	487902	19.049	19.0211	18.9264	19.0778	18.7381	18.6849	18.9594	18.8147	18.7899	18.8962	10	9	8	10	6	8	11	9	12	12	12	12	13	13	13	13	13	13	13	13	13
>ENSSSCP00000000553	9	0.869941	0.00176658	NAP1L1	none	nucleosome assembly protein 1-like 1 [Source:HGNC Symbol;Acc:7637]|5|ENSSSCG00000000522|ENSSSCT00000000564	3.30468e+06	3224032	3.44637e+06	3.39601e+06	3152304	2.87487e+06	2.99324e+06	2.67302e+06	3064557	2.85393e+06	2.78026e+06	2.88425e+06	21.6204	21.7166	21.6954	21.588	21.5133	21.35	21.5472	21.4445	21.4068	21.4598	9	9	9	9	7	7	7	9	8	8	9	9	9	9	9	9	9	9	9	9	9
>ENSSSCP00000007864	7	0.870012	0.00696871	YWHAB	none	tyrosine 3-monooxygenase/tryptophan 5-monooxygenase activation protein, beta [Source:HGNC Symbol;Acc:12849]|17|ENSSSCG00000007381|ENSSSCT00000008079	7.49377e+06	7.9658e+06	7.58511e+06	7.30697e+06	7117204	6.51967e+06	6331640	7.10209e+06	6.18543e+06	7.17229e+06	5.99975e+06	6326814	22.9254	22.8547	22.8008	22.7629	22.5941	22.7598	22.5604	22.774	22.5165	22.593	11	11	11	11	10	10	11	11	11	12	11	11	7	7	7	7	7	7	7	7	7
>ENSSSCP00000014507	9	0.870071	0.00962594	CDC37	none	Sus scrofa cell division cycle 37 homolog (S. cerevisiae) (CDC37), mRNA. [Source:RefSeq mRNA;Acc:NM_001123096]|2|ENSSSCG00000013647|ENSSSCT00000014908	2.07661e+06	1.98896e+06	2.24959e+06	2.00711e+06	2.06078e+06	1.8068e+06	1813308	1832626	1.70396e+06	1.84198e+06	1.7956e+06	1.85332e+06	20.9236	21.1012	20.9367	20.9748	20.7902	20.8055	20.7005	20.8128	20.776	20.8217	9	9	9	9	8	8	9	9	9	9	9	9	9	9	9	9	9	9	9	9	9
>ENSSSCP00000019731	7	0.870313	0.0104418	EIF2AK2	none	eukaryotic translation initiation factor 2-alpha kinase 2 [Source:HGNC Symbol;Acc:9437]|3|ENSSSCG00000025181|ENSSSCT00000028150	202936	186406	206477	212567	206293	176618	175694	160069	170246	177405	200263	176029	17.5081	17.6556	17.6976	17.6543	17.4227	17.2883	17.3773	17.4367	17.6115	17.4255	5	6	6	6	3	6	5	6	7	7	7	5	7	7	7	7	7	7	7	7	7
>ENSSSCP00000000076	9	0.871135	0.00811642	ST13	none	suppression of tumorigenicity 13 (colon carcinoma) (Hsp70 interacting protein) [Source:HGNC Symbol;Acc:11343]|5|ENSSSCG00000000071|ENSSSCT00000000077	1.65976e+06	1631545	1.76991e+06	1552878	1.68469e+06	1.44587e+06	1.41992e+06	1.4407e+06	1.54865e+06	1.57196e+06	1.36839e+06	1.32561e+06	20.6378	20.7552	20.5665	20.6841	20.4374	20.4583	20.5626	20.5841	20.384	20.3382	9	9	9	9	7	7	9	9	8	9	9	9	9	9	9	9	9	9	9	9	9
>ENSSSCP00000008796	12	0.87142	0.0126063	CAPG	none	capping protein (actin filament), gelsolin-like [Source:HGNC Symbol;Acc:1474]|3|ENSSSCG00000008239|ENSSSCT00000009022	5.48013e+06	5.53747e+06	5052482	5788604	5541976	4.77549e+06	4.15646e+06	5.25524e+06	4715431	5021155	4817261	4687418	22.4008	22.2686	22.4648	22.402	21.9869	22.3253	22.169	22.2596	22.1998	22.1604	12	12	12	12	11	11	12	12	12	12	13	12	12	12	12	12	12	12	12	12	12
>ENSSSCP00000016329	17	0.872079	0.00181178	CACNA2D1	none	Sus scrofa calcium channel, voltage-dependent, alpha 2/delta subunit 1 (CACNA2D1), mRNA. [Source:RefSeq mRNA;Acc:NM_214183]|9|ENSSSCG00000015402|ENSSSCT00000016777	341572	339714	349249	350958	326366	297878	297720	281135	308669	273109	305145	321487	18.374	18.4139	18.4209	18.3161	18.1836	18.1009	18.2357	18.0591	18.2191	18.2944	13	16	14	15	7	6	13	12	14	14	16	14	17	17	17	17	17	17	17	17	17
>ENSSSCP00000026779	11	0.872785	0.0132045	NASP	none	nuclear autoantigenic sperm protein (histone-binding) [Source:HGNC Symbol;Acc:7644]|GL895352.1|ENSSSCG00000029573|ENSSSCT00000022777	406342	409481	418892	374234	422761	354649	358121	341819	360965	353257	355379	358351	18.6434	18.6762	18.5136	18.6895	18.4501	18.3829	18.4615	18.4304	18.439	18.451	10	15	13	12	4	6	6	7	5	8	10	5	11	11	11	11	11	11	11	11	11
>ENSSSCP00000010887	12	0.874021	0.0134531	CCDC6	none	coiled-coil domain containing 6 [Source:HGNC Symbol;Acc:18782]|14|ENSSSCG00000010211|ENSSSCT00000011177	411712	384824	405646	414478	441900	359845	344366	386036	400347	357884	345795	324639	18.5538	18.6299	18.6609	18.7534	18.3936	18.5584	18.6109	18.4491	18.3996	18.3085	10	12	9	9	6	7	8	8	10	11	11	8	12	12	12	12	12	12	12	12	12
>ENSSSCP00000009863	4	0.874046	0.00179897	HNRNPD	none	heterogeneous nuclear ribonucleoprotein D (AU-rich element RNA binding protein 1, 37kDa) [Source:HGNC Symbol;Acc:5036]|8|ENSSSCG00000009249|ENSSSCT00000010129	1.54206e+06	1467313	1.53821e+06	1.57463e+06	1.58809e+06	1.34783e+06	1.24599e+06	1.35581e+06	1.4782e+06	1.32122e+06	1.3815e+06	1.30427e+06	20.4847	20.5528	20.5866	20.5989	20.2489	20.3707	20.4954	20.3334	20.3978	20.3148	4	4	4	4	4	4	4	4	4	4	4	4	4	4	4	4	4	4	4	4	4
>ENSSSCP00000024676	7	0.874758	0.0243572	CPSF3	none	cleavage and polyadenylation specific factor 3, 73kDa [Source:HGNC Symbol;Acc:2326]|3|ENSSSCG00000020799|ENSSSCT00000027309	104542	107714	106753	105791	97911	91449.1	107166	85937.5	93697.9	96736.9	79835.1	85321.5	16.7168	16.7039	16.6909	16.5792	16.7095	16.391	16.5157	16.5618	16.2847	16.3806	4	5	4	5	1	1	3	4	3	5	5	3	7	7	7	7	7	7	7	7	7
>ENSSSCP00000006990	3	0.875995	0.024475	TPM3	none	Sus scrofa tropomyosin 3 (TPM3), mRNA. [Source:RefSeq mRNA;Acc:NM_001001632]|4|ENSSSCG00000006556|ENSSSCT00000007183	653575	694935	605646	668025	645693	572528	495717	649511	558750	546900	563911	620381	19.4065	19.2081	19.3495	19.3005	18.9192	19.309	19.0918	19.0609	19.1051	19.2428	3	3	3	3	3	3	3	3	3	3	3	3	3	3	3	3	3	3	3	3	3
>ENSSSCP00000003775	4	0.877412	0.0490702	NECAP2	none	NECAP endocytosis associated 2 [Source:HGNC Symbol;Acc:25528]|6|ENSSSCG00000003477|ENSSSCT00000003863	171807	175682	151600	185064	174880	150745	139835	153999	158240	151156	153797	147444	17.4226	17.2099	17.4977	17.416	17.0934	17.2326	17.2718	17.2057	17.2307	17.1698	2	3	4	4	2	2	3	4	4	4	4	3	4	4	4	4	4	4	4	4	4
>ENSSSCP00000017826	6	0.878058	0.00824445	BRIX1	none	BRX1, biogenesis of ribosomes, homolog (S. cerevisiae) [Source:HGNC Symbol;Acc:24170]|16|ENSSSCG00000016827|ENSSSCT00000018322	103765	107088	102651	103902	101420	91111.9	102725	82409.8	95466.6	84797.8	91488.2	89784.2	16.7084	16.6474	16.6649	16.63	16.6484	16.3305	16.5427	16.3717	16.4813	16.4542	4	6	5	5	3	3	5	4	4	4	4	5	6	6	6	6	6	6	6	6	6
>ENSSSCP00000003661	7	0.87878	0.0046737	ACOT7	none	acyl-CoA thioesterase 7 [Source:HGNC Symbol;Acc:24157]|6|ENSSSCG00000003377|ENSSSCT00000003747	274709	280220	279229	269797	269591	241409	226461	238589	242131	226262	240755	274254	18.0962	18.0911	18.0415	18.0404	17.7889	17.8642	17.8854	17.7876	17.8772	18.0652	5	7	6	6	4	5	6	6	5	7	7	7	7	7	7	7	7	7	7	7	7
>ENSSSCP00000024652	7	0.879864	0.00398384	ACBD3	none	acyl-CoA binding domain containing 3 [Source:HGNC Symbol;Acc:15453]|GL893507.1|ENSSSCG00000024180|ENSSSCT00000027902	119376	115193	123763	114125	124423	105035	96762.2	107273	105451	110219	106578	103924	16.8137	16.9172	16.8003	16.9249	16.5622	16.7109	16.6862	16.75	16.7016	16.6652	4	6	5	6	4	5	7	7	7	6	6	8	7	7	7	7	7	7	7	7	7
>ENSSSCP00000024028	4	0.881579	0.000715413	RPL27	none	Sus scrofa ribosomal protein L27 (RPL27), mRNA. [Source:RefSeq mRNA;Acc:NM_001097479]|12|ENSSSCG00000025507|ENSSSCT00000026116	2.15736e+06	2.21742e+06	2.0868e+06	2.16902e+06	2.15621e+06	1.90189e+06	1.99234e+06	1.96154e+06	1.91938e+06	1.75117e+06	1.83808e+06	1.94882e+06	21.0805	20.9929	21.0486	21.0401	20.926	20.9036	20.8722	20.7399	20.8098	20.8942	4	4	4	4	4	4	4	4	4	4	4	4	4	4	4	4	4	4	4	4	4
>ENSSSCP00000016496	8	0.881757	0.0142849	ARPC5	none	Sus scrofa actin related protein 2/3 complex, subunit 5, 16kDa (ARPC5), mRNA. [Source:RefSeq mRNA;Acc:NM_001134357]|9|ENSSSCG00000015560|ENSSSCT00000016950	1.06613e+06	1077369	1.13877e+06	992280	1.05611e+06	940068	937156	1.01872e+06	831231	940176	935286	977844	20.0391	20.119	19.9204	20.0103	19.8379	19.9583	19.6649	19.8426	19.835	19.8992	5	8	5	7	5	5	6	7	6	8	7	6	8	8	8	8	8	8	8	8	8
>ENSSSCP00000018060	8	0.882758	0.0110169	CLINT1	none	clathrin interactor 1 [Source:HGNC Symbol;Acc:23186]|16|ENSSSCG00000017047|ENSSSCT00000018560	114462	113287	119005	108365	117192	101043	111827	97012.5	98864.4	89087.8	104465	104998	16.7896	16.8607	16.7255	16.8385	16.7709	16.5659	16.5932	16.4429	16.6727	16.68	5	5	7	7	5	3	7	5	5	4	7	6	8	8	8	8	8	8	8	8	8
>ENSSSCP00000009753	7	0.883778	0.0195026	RPL34	none	ribosomal protein L34 [Source:HGNC Symbol;Acc:10340]|8|ENSSSCG00000009146|ENSSSCT00000010015	1.28102e+06	1.34085e+06	1.21746e+06	1.30481e+06	1.26095e+06	1.13213e+06	1.13074e+06	1.28585e+06	1167176	1.07726e+06	978252	1.15352e+06	20.3547	20.2154	20.3154	20.2661	20.1088	20.2943	20.1546	20.0389	19.8998	20.1376	7	7	7	7	6	6	7	7	7	7	7	7	7	7	7	7	7	7	7	7	7
>ENSSSCP00000018085	8	0.884842	0.00646656	LARP1	none	Uncharacterized protein [Source:UniProtKB/TrEMBL;Acc:F1RQC5]|16|ENSSSCG00000017069|ENSSSCT00000018585	120475	125652	124155	119209	112885	106602	103812	107993	113631	102030	111145	100999	16.9391	16.9218	16.8631	16.7845	16.6636	16.7206	16.794	16.6386	16.7621	16.624	5	7	6	7	1	1	5	5	10	8	10	6	8	8	8	8	8	8	8	8	8
>ENSSSCP00000017050	11	0.885487	0.00300644	BZW1	none	Sus scrofa basic leucine zipper and W2 domains 1 (BZW1), mRNA. [Source:RefSeq mRNA;Acc:NM_001244493]|15|ENSSSCG00000016094|ENSSSCT00000017522	1.15127e+06	1.13831e+06	1.14199e+06	1.172e+06	1.15277e+06	1.01943e+06	1060526	1.00837e+06	1039827	908451	1.03672e+06	1.0627e+06	20.1185	20.1231	20.1605	20.1367	20.0163	19.9436	19.9879	19.793	19.9836	20.0193	11	11	10	12	11	9	10	10	11	11	12	11	11	11	11	11	11	11	11	11	11
>ENSSSCP00000006426	14	0.887203	1.2646e-05	EIF3H	none	eukaryotic translation initiation factor 3, subunit H [Source:HGNC Symbol;Acc:3273]|4|ENSSSCG00000006016|ENSSSCT00000006602	690895	681262	694690	692639	694989	612964	636519	619122	618642	607467	595599	600435	19.3778	19.406	19.4017	19.4066	19.2798	19.2399	19.2387	19.2124	19.184	19.1956	12	13	11	13	10	9	12	12	13	13	14	13	14	14	14	14	14	14	14	14	14
>ENSSSCP00000000108	30	0.887659	0.0017612	DDX17	none	DEAD (Asp-Glu-Ala-Asp) box helicase 17 [Source:HGNC Symbol;Acc:2740]|5|ENSSSCG00000000104|ENSSSCT00000000110	4.01151e+06	4079648	3.95596e+06	4031807	3.97863e+06	3.56086e+06	3.44023e+06	3.70067e+06	3843029	3.43099e+06	3.34922e+06	3.60099e+06	21.96	21.9156	21.943	21.9238	21.7141	21.8194	21.8738	21.7102	21.6754	21.78	25	29	26	26	26	24	26	28	26	27	29	29	30	30	30	30	30	30	30	30	30
>ENSSSCP00000008441	22	0.888048	0.0115093	USP7	none	ubiquitin specific peptidase 7 (herpes virus-associated) [Source:HGNC Symbol;Acc:12630]|3|ENSSSCG00000007907|ENSSSCT00000008664	338138	315772	337586	355952	343239	300282	335582	277436	301130	298137	288120	301290	18.2685	18.3649	18.4413	18.3889	18.3563	18.0818	18.2	18.1856	18.1363	18.2008	7	15	8	12	2	4	11	10	11	13	20	12	22	22	22	22	22	22	22	22	22
>ENSSSCP00000017984	100	0.888773	0.00078836	MAP1B	none	microtubule-associated protein 1B [Source:HGNC Symbol;Acc:6836]|16|ENSSSCG00000016974|ENSSSCT00000018484	34757780	33710428	35452060	34571296	35297336	30891784	30631454	30805440	28668564	30371464	32498544	32375238	25.0067	25.0794	25.0431	25.0731	24.8685	24.8767	24.773	24.8562	24.9539	24.9484	93	98	95	95	89	90	93	96	98	99	100	96	100	100	100	100	100	100	100	100	100
>ENSSSCP00000009470	11	0.88929	0.0143597	PPID	none	peptidylprolyl isomerase D [Source:HGNC Symbol;Acc:9257]|8|ENSSSCG00000008878|ENSSSCT00000009719	461795	469062	457046	473906	447165	410669	398305	451971	452747	403288	371552	386154	18.8394	18.802	18.8542	18.7704	18.6035	18.7859	18.7883	18.6215	18.5032	18.5588	6	10	8	7	4	4	6	8	10	11	11	12	11	11	11	11	11	11	11	11	11
>ENSSSCP00000024566	5	0.889748	0.0434592	TRIOBP	none	Uncharacterized protein [Source:UniProtKB/TrEMBL;Acc:I3LKF2]|5|ENSSSCG00000020777|ENSSSCT00000024579	93469.8	98294.9	91355.8	86166	98062.6	83164.6	71664.9	93244.8	89930.6	81211.9	79448.8	83486.4	16.5848	16.4792	16.3948	16.5814	16.129	16.5087	16.4565	16.3094	16.2777	16.3493	8	9	9	6	4	6	3	7	8	7	9	8	5	5	5	5	5	5	5	5	5
>ENSSSCP00000017711	17	0.89037	0.049314	DBNL	none	drebrin-like [Source:HGNC Symbol;Acc:2696]|18|ENSSSCG00000016721|ENSSSCT00000018202	1.7724e+06	1.66203e+06	1837832	1738373	1.85137e+06	1.57809e+06	1293225	1.72448e+06	1.52051e+06	1.60528e+06	1.74593e+06	1.57913e+06	20.6645	20.8096	20.7293	20.8202	20.3025	20.7177	20.5361	20.6144	20.7356	20.5907	17	17	17	17	9	16	16	17	17	17	18	17	17	17	17	17	17	17	17	17	17
>ENSSSCP00000005639	28	0.891035	0.0106848	TJP2	none	tight junction protein 2 [Source:HGNC Symbol;Acc:11828]|1|ENSSSCG00000005247|ENSSSCT00000005781	639332	598588	675858	650338	632545	569668	566681	547108	620377	563918	547870	572051	19.1912	19.3664	19.3108	19.2708	19.1122	19.0615	19.2428	19.1051	19.0635	19.1258	19	25	25	20	10	15	23	24	23	26	25	25	28	28	28	28	28	28	28	28	28
>ENSSSCP00000014443	13	0.892104	0.000195328	ELAVL1	none	Sus scrofa ELAV (embryonic lethal, abnormal vision, Drosophila)-like 1 (Hu antigen R) (ELAVL1), mRNA. [Source:RefSeq mRNA;Acc:NM_001195334]|2|ENSSSCG00000013592|ENSSSCT00000014844	1.23456e+06	1.20314e+06	1.23047e+06	1.26336e+06	1.24129e+06	1.10136e+06	1.09677e+06	1.1027e+06	1.12148e+06	1.03012e+06	1140650	1.11644e+06	20.1984	20.2308	20.2688	20.2434	20.0648	20.0726	20.097	19.9744	20.1214	20.0905	12	14	13	14	10	11	13	14	14	13	14	14	13	13	13	13	13	13	13	13	13
>ENSSSCP00000025827	13	0.893673	0.0487695	ACAT1	none	acetyl-CoA acetyltransferase 1 [Source:HGNC Symbol;Acc:93]|9|ENSSSCG00000026153|ENSSSCT00000028484	841322	788279	859111	863430	854467	751866	662853	730863	839543	848526	762665	666747	19.5883	19.7125	19.7197	19.7047	19.3383	19.4792	19.6792	19.6946	19.5407	19.3468	12	14	13	13	7	9	10	10	13	13	13	12	13	13	13	13	13	13	13	13	13
>ENSSSCP00000019985	13	0.894865	0.0293598	P3H1	none	leucine proline-enriched proteoglycan (leprecan) 1 [Source:HGNC Symbol;Acc:19316]|6|ENSSSCG00000023920|ENSSSCT00000025559	290791	310446	277486	290737	284496	260219	269357	295746	257366	238393	233885	266567	18.244	18.0821	18.1494	18.1181	18.0392	18.174	17.9735	17.863	17.8354	18.0241	11	12	11	10	12	9	10	11	10	11	10	11	13	13	13	13	13	13	13	13	13
>ENSSSCP00000004843	21	0.897799	0.00187708	EEF1A1	none	Sus scrofa eukaryotic translation elongation factor 1 alpha 1 (EEF1A1), mRNA. [Source:RefSeq mRNA;Acc:NM_001097418]|1|ENSSSCG00000004489|ENSSSCT00000004960	96488796	96176288	96125360	94967016	98686520	8.66276e+07	84316200	86320024	89569544	82248560	83599520	93711504	26.5192	26.5184	26.5009	26.5563	26.3293	26.3632	26.4165	26.2935	26.317	26.4817	23	27	27	26	26	25	23	22	26	25	26	26	21	21	21	21	21	21	21	21	21
>ENSSSCP00000017821	33	0.898972	0.00484738	RAI14	none	retinoic acid induced 14 [Source:HGNC Symbol;Acc:14873]|16|ENSSSCG00000016824|ENSSSCT00000018317	699977	674881	727363	713331	684330	629259	647296	597913	614047	603289	624248	688762	19.3643	19.4723	19.4442	19.3843	19.3041	19.1896	19.228	19.2025	19.2518	19.3936	31	33	33	28	11	21	30	25	32	33	32	33	33	33	33	33	33	33	33	33	33
>ENSSSCP00000010450	5	0.899206	0.020725	DENR	none	density-regulated protein [Source:HGNC Symbol;Acc:2769]|14|ENSSSCG00000009788|ENSSSCT00000010730	210823	197218	223925	215703	206446	189573	177091	191266	185244	194949	195151	193738	17.5894	17.7727	17.7187	17.6554	17.4341	17.5452	17.4991	17.5727	17.5742	17.5637	5	5	4	5	4	4	3	5	4	5	5	5	5	5	5	5	5	5	5	5	5
>ENSSSCP00000014442	8	0.899253	0.0219782	TIMM44	none	translocase of inner mitochondrial membrane 44 homolog (yeast) [Source:HGNC Symbol;Acc:17316]|2|ENSSSCG00000013591|ENSSSCT00000014843	111266	104133	116781	110676	113472	100056	107583	92227.3	109778	99899.5	96076.8	94770.2	16.6681	16.8334	16.756	16.792	16.7151	16.4929	16.7442	16.6082	16.5519	16.5321	6	7	6	7	3	5	6	5	7	7	6	7	8	8	8	8	8	8	8	8	8
>ENSSSCP00000003207	38	0.899767	0.00480814	ACTN4	none	Uncharacterized protein [Source:UniProtKB/TrEMBL;Acc:F1RI39]|6|ENSSSCG00000002965|ENSSSCT00000003289	2.14137e+07	22522948	21332522	20492394	21306786	1.92673e+07	18732656	20091366	19445378	18658874	18859412	19816148	24.4249	24.3466	24.2886	24.3448	24.1591	24.2601	24.2129	24.1534	24.1688	24.2402	56	57	56	57	55	55	55	56	56	57	58	57	38	38	38	38	38	38	38	38	38
>ENSSSCP00000020585	6	0.899942	0.0264845	PARVA	none	parvin, alpha [Source:HGNC Symbol;Acc:14652]|2|ENSSSCG00000028827|ENSSSCT00000028332	429710	443538	429955	395269	450075	386714	391634	372328	367923	371848	392451	424099	18.7587	18.7138	18.5925	18.7798	18.5791	18.5062	18.489	18.5044	18.5822	18.694	8	8	8	8	7	7	8	9	8	8	8	8	6	6	6	6	6	6	6	6	6
>ENSSSCP00000011573	3	0.900348	0.014582	PYCR2	none	Pyrroline-5-carboxylate reductase [Source:UniProtKB/TrEMBL;Acc:F1S8R2]|10|ENSSSCG00000010855|ENSSSCT00000011877	59167.2	59715.2	60029.4	56631.7	60292.7	53271.1	57779.6	55456.8	51377.8	46854	53574.9	54583.5	15.8658	15.8734	15.7893	15.8797	15.8183	15.7591	15.6489	15.5159	15.7093	15.7362	5	6	5	4	4	5	5	4	5	5	5	5	3	3	3	3	3	3	3	3	3
>ENSSSCP00000023668	5	0.900461	0.015518	EIPR1	none	tumor suppressing subtransferable candidate 1 [Source:HGNC Symbol;Acc:12383]|3|ENSSSCG00000028755|ENSSSCT00000030705	75345.7	72174.3	73445.8	77129.3	78633.3	67845.9	61605.5	68305.7	70239.4	73281.6	70697.6	62945.5	16.1392	16.1644	16.235	16.2629	15.9108	16.0597	16.1	16.1612	16.1094	15.9418	2	5	4	3	1	1	1	4	3	4	3	3	5	5	5	5	5	5	5	5	5
>ENSSSCP00000010279	25	0.900737	0.0314138	CCAR2	none	cell cycle and apoptosis regulator 2 [Source:HGNC Symbol;Acc:23360]|14|ENSSSCG00000009628|ENSSSCT00000010555	645232	618833	668013	605785	688296	581185	599474	574194	535408	607583	591842	578607	19.2392	19.3495	19.2084	19.3927	19.1933	19.1312	19.0303	19.2127	19.1749	19.1422	15	22	18	17	6	10	22	17	21	23	23	15	25	25	25	25	25	25	25	25	25
>ENSSSCP00000022764	14	0.901737	0.0150505	AIMP1	none	Sus scrofa aminoacyl tRNA synthetase complex-interacting multifunctional protein 1 (AIMP1), mRNA. [Source:RefSeq mRNA;Acc:NM_001114283]|8|ENSSSCG00000024168|ENSSSCT00000023345	865898	860020	862707	909158	831707	780813	734791	886720	788184	766044	775065	734072	19.714	19.7185	19.7942	19.6657	19.487	19.7581	19.5882	19.5471	19.564	19.4856	13	12	12	14	6	11	12	14	12	13	14	12	14	14	14	14	14	14	14	14	14
>ENSSSCP00000016940	11	0.903548	0.0476201	HNRNPA3	none	heterogeneous nuclear ribonucleoprotein A3 [Source:HGNC Symbol;Acc:24941]|15|ENSSSCG00000015988|ENSSSCT00000017409	2.36853e+06	2.34491e+06	2.3187e+06	2.35868e+06	2.45184e+06	2.14008e+06	1.84096e+06	2.47019e+06	2196930	2.07295e+06	2224803	2034658	21.1611	21.1449	21.1696	21.2254	20.812	21.2362	21.0671	20.9833	21.0852	20.9564	10	10	10	9	8	10	10	10	11	11	10	10	11	11	11	11	11	11	11	11	11
>ENSSSCP00000026363	4	0.904138	0.0306095	SUB1	none	SUB1 homolog (S. cerevisiae) [Source:HGNC Symbol;Acc:19985]|15|ENSSSCG00000022132|ENSSSCT00000023763	988739	1.00922e+06	1.00321e+06	934191	1.00834e+06	893957	840961	1.01811e+06	911055	797168	906118	890329	19.9448	19.9362	19.8334	19.9435	19.6817	19.9575	19.7972	19.6045	19.7893	19.764	4	4	4	4	3	3	4	4	4	4	4	4	4	4	4	4	4	4	4	4	4
>ENSSSCP00000028198	15	0.904189	0.0234044	PPP1R12A	none	protein phosphatase 1, regulatory subunit 12A [Source:HGNC Symbol;Acc:7618]|5|ENSSSCG00000025095|ENSSSCT00000028012	332068	341050	328549	309128	349544	300252	290625	304407	306585	279550	295357	324988	18.3796	18.3258	18.2378	18.4151	18.1488	18.2156	18.2259	18.0927	18.1721	18.31	12	15	12	13	9	10	12	13	13	14	15	14	15	15	15	15	15	15	15	15	15
>ENSSSCP00000004499	15	0.905308	0.0471584	BCLAF1	none	BCL2-associated transcription factor 1 [Source:HGNC Symbol;Acc:16863]|1|ENSSSCG00000004163|ENSSSCT00000004602	414230	411150	446404	383592	415772	375005	378147	368502	382222	372072	381883	367206	18.6493	18.768	18.5492	18.6654	18.5286	18.4913	18.544	18.5052	18.5428	18.4862	10	12	11	10	4	8	11	9	14	13	15	14	15	15	15	15	15	15	15	15	15
>ENSSSCP00000000289	9	0.905458	0.020265	PCBP2	none	poly(rC) binding protein 2 [Source:HGNC Symbol;Acc:8648]|5|ENSSSCG00000000274|ENSSSCT00000000294	3.6548e+06	3.85522e+06	3.41954e+06	3.71323e+06	3.63122e+06	3.30927e+06	3.37225e+06	3.35945e+06	3585176	3.19834e+06	3.07207e+06	3.26834e+06	21.8784	21.7054	21.8242	21.792	21.6853	21.6798	21.7736	21.6089	21.5508	21.6401	12	12	13	12	12	11	12	13	13	13	12	13	9	9	9	9	9	9	9	9	9
>ENSSSCP00000000178	18	0.905945	0.0136476	CKAP4	none	cytoskeleton-associated protein 4 [Source:HGNC Symbol;Acc:16991]|5|ENSSSCG00000000171|ENSSSCT00000000180	4.6496e+06	4.57451e+06	4.74465e+06	4.6493e+06	4629917	4.21228e+06	4.49688e+06	4608754	4.04751e+06	3.84543e+06	4150521	4.12459e+06	22.1252	22.1779	22.1486	22.1426	22.1005	22.1359	21.9486	21.8747	21.9849	21.9758	16	16	16	15	15	15	18	16	16	17	16	16	18	18	18	18	18	18	18	18	18
>ENSSSCP00000010537	7	0.906386	0.0230179	PLBD2	none	phospholipase B domain containing 2 [Source:HGNC Symbol;Acc:27283]|14|ENSSSCG00000009872|ENSSSCT00000010820	230563	237296	217209	224034	243711	208979	216159	201324	212684	205228	197849	220628	17.8563	17.7287	17.7734	17.8948	17.7217	17.6192	17.6983	17.6469	17.594	17.7513	5	7	5	6	4	3	5	5	6	6	6	6	7	7	7	7	7	7	7	7	7
>ENSSSCP00000020097	24	0.907042	0.0188449	HSPA1B	none	Sus scrofa heat shock protein 70.2 (HSP70.2), mRNA. [Source:RefSeq mRNA;Acc:NM_213766]|GL896522.1|ENSSSCG00000030368|ENSSSCT00000032249	1.06359e+07	11292013	10201540	10826953	10223059	9647201	9837343	9504654	10075824	9523548	8871353	10070484	23.4288	23.2823	23.3681	23.2853	23.2298	23.1802	23.2644	23.1831	23.0807	23.2636	23	23	23	21	21	21	22	24	22	24	24	22	24	24	24	24	24	24	24	24	24
>ENSSSCP00000010218	11	0.90826	0.00338217	PSPC1	none	paraspeckle component 1 [Source:HGNC Symbol;Acc:20320]|11|ENSSSCG00000009569|ENSSSCT00000010490	524217	498492	531405	534740	532231	476125	459659	497400	477313	464412	492662	465305	18.9272	19.0195	19.0285	19.0217	18.8102	18.924	18.8646	18.825	18.9102	18.8278	9	12	10	10	6	8	9	9	12	11	11	11	11	11	11	11	11	11	11	11	11
>ENSSSCP00000021732	6	0.910132	0.0477314	RPL36	none	ribosomal protein L36 [Source:HGNC Symbol;Acc:13631]|2|ENSSSCG00000030010|ENSSSCT00000028373	1.67849e+06	1.7627e+06	1.67869e+06	1.66043e+06	1.61213e+06	1.52764e+06	1.56183e+06	1742450	1.46304e+06	1.43922e+06	1.35818e+06	1.60115e+06	20.7494	20.6789	20.6631	20.6205	20.5748	20.7327	20.4805	20.4569	20.3732	20.6107	4	6	5	5	3	4	4	4	5	4	5	6	6	6	6	6	6	6	6	6	6
>ENSSSCP00000028492	4	0.910133	0.0470835	LRP5	none	Uncharacterized protein [Source:UniProtKB/TrEMBL;Acc:I3LG92]|5|ENSSSCG00000023150|ENSSSCT00000034126	212593	210725	210114	217726	211809	193488	192368	201759	214939	204508	179629	167727	17.685	17.6808	17.7322	17.6924	17.5535	17.6223	17.7136	17.6418	17.4547	17.3558	14	16	14	13	11	12	13	13	15	14	16	15	4	4	4	4	4	4	4	4	4
>ENSSSCP00000005603	2	0.910728	0.0113989	PLGRKT	none	plasminogen receptor, C-terminal lysine transmembrane protein [Source:HGNC Symbol;Acc:23633]|1|ENSSSCG00000005212|ENSSSCT00000005745	60264.1	61413.5	60543	57702	61397.9	54884.2	55867.8	54158.6	52808.6	50660.6	60512.6	55297	15.9063	15.8857	15.8163	15.9059	15.7697	15.7249	15.6885	15.6286	15.8849	15.7549	2	2	2	2	1	2	2	2	2	2	2	2	2	2	2	2	2	2	2	2	2
>ENSSSCP00000027866	12	0.912764	0.025846	ACAD9	none	acyl-CoA dehydrogenase family, member 9 [Source:HGNC Symbol;Acc:21497]|13|ENSSSCG00000023354|ENSSSCT00000023990	233138	249590	226872	224036	232056	212800	214831	225488	192655	211103	213100	219624	17.9292	17.7915	17.7734	17.8241	17.7128	17.7827	17.5557	17.6876	17.7012	17.7447	7	6	7	7	2	5	7	6	7	9	12	8	12	12	12	12	12	12	12	12	12
>ENSSSCP00000003248	6	0.915028	0.0343956	SNRPA	none	Sus scrofa small nuclear ribonucleoprotein polypeptide A (SNRPA), mRNA. [Source:RefSeq mRNA;Acc:NM_001077222]|6|ENSSSCG00000002998|ENSSSCT00000003330	312434	314960	314089	304015	316670	285886	324396	281039	289657	255860	274783	289579	18.2648	18.2608	18.2138	18.2726	18.3074	18.1004	18.144	17.965	18.0679	18.1436	6	6	6	5	5	6	7	6	6	6	6	6	6	6	6	6	6	6	6	6	6
>ENSSSCP00000021980	7	0.91596	0.0378612	UQCRFS1	none	ubiquinol-cytochrome c reductase, Rieske iron-sulfur polypeptide 1 [Source:HGNC Symbol;Acc:12587]|6|ENSSSCG00000027085|ENSSSCT00000030609	655269	700967	620861	664278	634971	600200	650741	608950	599262	568848	585836	587564	19.419	19.2439	19.3414	19.2763	19.3117	19.216	19.1928	19.1177	19.1601	19.1644	7	7	5	7	6	7	7	7	7	6	8	6	7	7	7	7	7	7	7	7	7
>ENSSSCP00000001487	7	0.91617	0.00808562	DDX39B	none	Sus scrofa DEAD (Asp-Glu-Ala-Asp) box polypeptide 39B (DDX39B), mRNA. [Source:RefSeq mRNA;Acc:NM_001005157]|7|ENSSSCG00000001400|ENSSSCT00000001529	687410	710333	686168	695570	657569	629784	647635	646569	672180	603062	603435	605824	19.4381	19.3882	19.4078	19.3268	19.3048	19.3024	19.3585	19.2019	19.2028	19.2085	19	17	17	17	18	18	17	18	18	18	17	18	7	7	7	7	7	7	7	7	7
>ENSSSCP00000015382	11	0.916841	0.0265574	TCOF1	none	Treacher Collins-Franceschetti syndrome 1 [Source:HGNC Symbol;Acc:11654]|2|ENSSSCG00000014450|ENSSSCT00000015798	153755	142955	156296	158278	157490	140969	134774	145238	147067	134187	143485	141061	17.1252	17.2539	17.2721	17.2649	17.0402	17.1481	17.1661	17.0339	17.1305	17.106	8	10	9	9	1	4	6	8	5	9	7	8	11	11	11	11	11	11	11	11	11
>ENSSSCP00000014807	4	0.917567	0.0178745	ARMC6	none	armadillo repeat containing 6 [Source:HGNC Symbol;Acc:25049]|2|ENSSSCG00000013927|ENSSSCT00000015213	65874.5	66906.1	62114.6	66574.2	67903.2	60444.3	64504.4	56215.6	60629	59757.8	58245.2	63313.8	16.0298	15.9226	16.0227	16.0512	15.9771	15.7787	15.8877	15.8668	15.8299	15.9502	3	3	3	4	3	3	4	4	4	4	3	4	4	4	4	4	4	4	4	4	4
>ENSSSCP00000018787	5	0.917751	0.0200007	ZNF207	none	zinc finger protein 207 [Source:HGNC Symbol;Acc:12998]|12|ENSSSCG00000017732|ENSSSCT00000019299	225249	212339	227071	234420	227165	206722	218084	205565	201411	194736	220769	199768	17.696	17.7928	17.8387	17.7934	17.7345	17.6492	17.6198	17.5712	17.7522	17.608	4	5	5	5	3	3	5	4	4	5	5	4	5	5	5	5	5	5	5	5	5
>ENSSSCP00000023652	21	0.919513	0.0148449	EIF2S1	none	eukaryotic translation initiation factor 2, subunit 1 alpha, 35kDa [Source:HGNC Symbol;Acc:3265]|7|ENSSSCG00000027990|ENSSSCT00000030998	1.95452e+06	2.02682e+06	1.97253e+06	1909827	1.9089e+06	1.7972e+06	1.86336e+06	1.93993e+06	1.84566e+06	1.69057e+06	1.69031e+06	1.7534e+06	20.9508	20.9116	20.865	20.8643	20.8295	20.8876	20.8157	20.6891	20.6889	20.7417	21	21	21	21	20	21	20	21	21	21	21	20	21	21	21	21	21	21	21	21	21
>ENSSSCP00000011761	38	0.923148	0.0416503	KIF5B	none	Uncharacterized protein [Source:UniProtKB/TrEMBL;Acc:F1RWC5]|10|ENSSSCG00000011027|ENSSSCT00000012069	2.23007e+06	2.36464e+06	2.26028e+06	2.09593e+06	2.19945e+06	2.05869e+06	2.09579e+06	2.04542e+06	2.17402e+06	2.01862e+06	1.98278e+06	2.0355e+06	21.1732	21.1081	20.9992	21.0687	20.9991	20.964	21.0519	20.9449	20.9191	20.957	35	40	40	38	30	30	38	38	40	43	42	40	38	38	38	38	38	38	38	38	38
>ENSSSCP00000021552	22	0.923515	0.0467494	ARCN1	none	archain 1 [Source:HGNC Symbol;Acc:649]|9|ENSSSCG00000030053|ENSSSCT00000028599	1.64102e+06	1.74373e+06	1.55922e+06	1.58903e+06	1.6721e+06	1.51551e+06	1531326	1.53899e+06	1618775	1.41507e+06	1438822	1550053	20.7337	20.5724	20.5997	20.6732	20.5464	20.5535	20.6265	20.4324	20.4565	20.5639	22	21	21	21	20	19	21	21	23	23	22	23	22	22	22	22	22	22	22	22	22
>ENSSSCP00000025125	11	0.928364	0.0373055	LRP1	none	Uncharacterized protein [Source:UniProtKB/TrEMBL;Acc:I3LM05]|5|ENSSSCG00000021357|ENSSSCT00000032331	493083	478580	490681	501810	501262	457761	434112	441340	505330	468890	423288	473608	18.8684	18.9044	18.9368	18.9352	18.7277	18.7515	18.9469	18.8389	18.6913	18.8533	12	11	11	10	8	8	11	10	12	11	12	11	11	11	11	11	11	11	11	11	11
>ENSSSCP00000017495	13	0.928574	0.0345498	ZC3HAV1	none	Sus scrofa zinc finger CCCH-type, antiviral 1 (ZC3HAV1), mRNA. [Source:RefSeq mRNA;Acc:NM_001177489]|18|ENSSSCG00000016512|ENSSSCT00000017979	212639	200222	215730	219169	215433	197451	181545	190566	202356	207279	197182	205775	17.6112	17.7189	17.7417	17.7169	17.47	17.5399	17.6265	17.6612	17.5892	17.6507	9	11	10	10	4	7	11	6	8	12	13	10	13	13	13	13	13	13	13	13	13
>ENSSSCP00000001803	11	0.93214	0.0223143	KLC4	none	kinesin light chain 4 [Source:HGNC Symbol;Acc:21624]|7|ENSSSCG00000001659|ENSSSCT00000001850	204071	196088	204963	204963	210269	190223	182655	192418	206786	193776	185289	180411	17.5811	17.645	17.645	17.6819	17.4788	17.5539	17.6578	17.564	17.4994	17.4609	14	17	18	16	9	14	14	15	16	18	18	17	11	11	11	11	11	11	11	11	11
>ENSSSCP00000002995	10	0.932686	0.0411902	ATP6V0D1	none	ATPase, H+ transporting, lysosomal 38kDa, V0 subunit d1 [Source:HGNC Symbol;Acc:13724]|6|ENSSSCG00000002776|ENSSSCT00000003074	524173	529526	517176	521915	528075	488889	520318	503200	523373	450910	477214	458319	19.0143	18.9803	18.9935	19.0104	18.989	18.9408	18.9975	18.7825	18.8643	18.806	8	10	9	8	6	7	7	7	10	10	10	7	10	10	10	10	10	10	10	10	10
>ENSSSCP00000002608	13	0.937583	0.024464	AHSA1	none	Uncharacterized protein [Source:UniProtKB/TrEMBL;Acc:F1SE06]|7|ENSSSCG00000002406|ENSSSCT00000002675	573096	586662	548475	566792	590456	537325	547137	543806	567642	518994	529151	517223	19.1622	19.0651	19.1125	19.1715	19.0615	19.0527	19.1146	18.9854	19.0133	18.9804	12	13	10	13	7	7	12	13	11	13	13	14	13	13	13	13	13	13	13	13	13
>ENSSSCP00000018191	34	0.949268	0.0197642	SEP9	none	septin 9 [Source:HGNC Symbol;Acc:7323]|12|ENSSSCG00000017168|ENSSSCT00000018692	6.24657e+06	6428925	6323130	6058830	6.17539e+06	5.92967e+06	6048587	6035297	6002814	5622583	5883985	5984759	22.6161	22.5922	22.5306	22.5581	22.5282	22.525	22.5172	22.4228	22.4884	22.5129	31	34	31	32	27	27	32	31	33	33	34	33	34	34	34	34	34	34	34	34	34
>ENSSSCP00000011286	18	1.05111	0.0109184	NT5C2	none	5'-nucleotidase, cytosolic II [Source:HGNC Symbol;Acc:8022]|14|ENSSSCG00000010594|ENSSSCT00000011588	912835	923076	885873	929914	912479	959489	952188	936573	980602	953347	995791	938434	19.8161	19.7567	19.8267	19.7994	19.8609	19.837	19.9033	19.8626	19.9255	19.8399	12	15	14	15	11	9	14	13	16	16	18	16	18	18	18	18	18	18	18	18	18
>ENSSSCP00000021309	11	1.05809	0.0297644	PSMD1	none	Uncharacterized protein [Source:UniProtKB/TrEMBL;Acc:I3LB90]|15|ENSSSCG00000021677|ENSSSCT00000031305	796491	801672	822046	791366	770878	842760	893957	816360	816003	815216	839023	875999	19.6127	19.6489	19.594	19.5561	19.7698	19.6388	19.6382	19.6368	19.6784	19.7406	9	9	9	8	8	8	10	11	9	10	8	9	11	11	11	11	11	11	11	11	11
>ENSSSCP00000019219	6	1.06183	0.00325118	VAPA	none	VAMP (vesicle-associated membrane protein)-associated protein A, 33kDa [Source:HGNC Symbol;Acc:12648]|GL894031.1|ENSSSCG00000021632|ENSSSCT00000029876	409491	409357	411718	398425	418466	434810	439067	433637	442518	438196	421391	434052	18.643	18.6513	18.6039	18.6748	18.7441	18.7261	18.7554	18.7412	18.6848	18.7275	4	4	4	5	4	4	5	5	5	6	6	7	6	6	6	6	6	6	6	6	6
>ENSSSCP00000024389	2	1.06278	0.0264645	TOR1AIP2	none	torsin A interacting protein 2 [Source:HGNC Symbol;Acc:24055]|JH118510.1|ENSSSCG00000027083|ENSSSCT00000029742	22890.2	22720.2	22641.7	23013.1	23185.9	24327.4	24314.3	23773.5	23588.1	22936.5	25205.1	26146.8	14.4717	14.4667	14.4902	14.501	14.5695	14.5371	14.5258	14.4854	14.6214	14.6743	2	3	3	2	1	2	4	4	4	4	4	5	2	2	2	2	2	2	2	2	2
>ENSSSCP00000016262	5	1.06655	0.0465405	DYNC1I1	none	dynein, cytoplasmic 1, intermediate chain 1 [Source:HGNC Symbol;Acc:2963]|9|ENSSSCG00000015335|ENSSSCT00000016708	160831	159478	168963	155741	159142	171535	164893	162916	172996	187294	174021	167091	17.283	17.3663	17.2488	17.28	17.3312	17.3138	17.4004	17.5149	17.4089	17.3503	6	8	6	6	2	5	7	8	9	9	9	9	5	5	5	5	5	5	5	5	5
>ENSSSCP00000009492	12	1.06673	0.00395998	SRP72	none	signal recognition particle 72kDa [Source:HGNC Symbol;Acc:11303]|8|ENSSSCG00000008900|ENSSSCT00000009744	148871	150499	148295	150377	146313	158805	150710	159464	154772	164137	164138	159607	17.1994	17.1781	17.1982	17.1587	17.2014	17.2829	17.2398	17.3245	17.3245	17.2842	7	13	8	8	2	6	8	8	9	16	13	11	12	12	12	12	12	12	12	12	12
>ENSSSCP00000023552	16	1.0684	0.047817	ACTR10	none	Uncharacterized protein [Source:UniProtKB/TrEMBL;Acc:I3LHK5]|1|ENSSSCG00000022299|ENSSSCT00000030515	419326	443906	399836	420796	412768	448007	466057	456136	443152	439741	423685	459270	18.7599	18.6091	18.6828	18.655	18.8301	18.7991	18.7574	18.7463	18.6926	18.809	11	14	10	10	7	4	12	12	14	14	15	15	16	16	16	16	16	16	16	16	16
>ENSSSCP00000005012	13	1.0733	0.00314787	COPS2	none	COP9 signalosome subunit 2 [Source:HGNC Symbol;Acc:30747]|1|ENSSSCG00000004652|ENSSSCT00000005137	389862	393595	384018	382166	399667	418438	436500	408995	414755	430181	399779	420419	18.5864	18.5508	18.5438	18.6084	18.7356	18.6417	18.6619	18.7146	18.6088	18.6815	8	10	10	11	6	9	12	10	13	12	13	11	13	13	13	13	13	13	13	13	13
>ENSSSCP00000008265	17	1.0743	0.041756	GUSB	none	Sus scrofa glucuronidase, beta (GUSB), mRNA. [Source:RefSeq mRNA;Acc:NM_001123121]|3|ENSSSCG00000007739|ENSSSCT00000008484	660790	688812	621141	662136	671069	709888	702331	679532	672568	751350	737506	716040	19.3938	19.2446	19.3368	19.3561	19.4218	19.3742	19.3593	19.5191	19.4923	19.4497	15	18	14	13	13	8	15	15	14	18	16	18	17	17	17	17	17	17	17	17	17
>ENSSSCP00000005064	33	1.07655	0.0178799	PDIA3	none	Sus scrofa protein disulfide isomerase family A, member 3 (PDIA3), mRNA. [Source:RefSeq mRNA;Acc:NM_001195112]|1|ENSSSCG00000004700|ENSSSCT00000005190	31059106	31323904	31013232	31011786	30887502	33436734	32073610	33863476	36464408	33772108	32967812	31478990	24.9008	24.8864	24.8863	24.8805	24.9349	25.0132	25.12	25.0093	24.9746	24.9079	30	32	31	32	28	28	31	31	32	33	33	32	33	33	33	33	33	33	33	33	33
>ENSSSCP00000024202	25	1.07778	0.0336979	DPYSL2	none	dihydropyrimidinase-like 2 [Source:HGNC Symbol;Acc:3014]|14|ENSSSCG00000030130|ENSSSCT00000031898	18667600	19361094	18597470	18217362	18494474	2.01195e+07	18571482	19488436	21928800	21241186	19563334	19923808	24.2067	24.1486	24.1188	24.1406	24.1466	24.2161	24.3863	24.3404	24.2216	24.248	25	25	25	25	24	23	25	25	25	25	25	25	25	25	25	25	25	25	25	25	25
>ENSSSCP00000011654	6	1.07838	0.042908	CYB5R1	none	cytochrome b5 reductase 1 [Source:HGNC Symbol;Acc:13397]|10|ENSSSCG00000010929|ENSSSCT00000011961	164559	166725	167993	161224	162296	177458	189263	162365	178806	170111	171063	193141	17.3471	17.358	17.2987	17.3083	17.53	17.3089	17.448	17.3761	17.3842	17.5593	5	4	4	6	2	3	4	4	6	6	6	4	6	6	6	6	6	6	6	6	6
>ENSSSCP00000018317	19	1.08512	0.00433147	PSMC5	none	Sus scrofa Tat-binding protein 10 (TBP10), mRNA. [Source:RefSeq mRNA;Acc:NM_213983]|12|ENSSSCG00000017287|ENSSSCT00000018819	1.39725e+06	1364207	1.43157e+06	1.42761e+06	1.3656e+06	1.51618e+06	1.51785e+06	1505862	1.63314e+06	1.47531e+06	1.47591e+06	1488997	20.3796	20.4492	20.4452	20.3811	20.5336	20.5222	20.6392	20.4926	20.4932	20.5059	17	19	18	18	14	15	17	18	19	19	19	18	19	19	19	19	19	19	19	19	19
>ENSSSCP00000022294	6	1.08537	0.018185	PAFAH1B2	none	platelet-activating factor acetylhydrolase 1b, catalytic subunit 2 (30kDa) [Source:HGNC Symbol;Acc:8575]|9|ENSSSCG00000024027|ENSSSCT00000027329	929429	966598	902849	895814	952454	1.00878e+06	1.07588e+06	985373	1.03218e+06	1.02683e+06	935710	996692	19.8826	19.7841	19.7728	19.8613	20.0371	19.9103	19.9773	19.9698	19.8357	19.9268	6	6	4	5	5	4	5	6	6	6	5	6	6	6	6	6	6	6	6	6	6
>ENSSSCP00000004806	19	1.08573	0.00453854	PGM3	none	Phosphoacetylglucosamine mutase; Uncharacterized protein [Source:UniProtKB/TrEMBL;Acc:F1RQM2]|1|ENSSSCG00000004456|ENSSSCT00000004922	973670	972403	985410	948652	988213	1.05715e+06	1.05081e+06	997053	1.10893e+06	1.016e+06	1.06234e+06	1.10774e+06	19.8912	19.9104	19.8555	19.9145	20.0031	19.9273	20.0807	19.9545	20.0188	20.0792	17	18	18	17	13	14	17	18	19	20	19	18	19	19	19	19	19	19	19	19	19
>ENSSSCP00000014816	4	1.08588	0.0292762	NDUFA13	none	Uncharacterized protein [Source:UniProtKB/TrEMBL;Acc:F1S6Q1]|2|ENSSSCG00000013936|ENSSSCT00000015222	106674	106105	110869	99955.6	109765	115835	116223	115305	117198	118385	117695	110205	16.6951	16.7585	16.609	16.7441	16.8265	16.8151	16.8386	16.8531	16.8447	16.7498	3	3	3	3	1	2	3	2	2	4	4	3	4	4	4	4	4	4	4	4	4
>ENSSSCP00000006058	137	1.08791	0.0126935	SPTAN1	none	Uncharacterized protein [Source:UniProtKB/TrEMBL;Acc:F1RR78]|1|ENSSSCG00000005654|ENSSSCT00000006217	1.91559e+07	18962180	19984056	19319596	18357898	20839937	21572338	20765794	21787386	19293064	20208188	21412852	24.1766	24.2523	24.2036	24.1299	24.3627	24.3077	24.377	24.2016	24.2684	24.352	125	132	128	129	105	112	130	130	132	139	133	135	137	137	137	137	137	137	137	137	137
>ENSSSCP00000011998	9	1.08876	0.0256005	STK39	none	|13|ENSSSCG00000011253|ENSSSCT00000012320	341675	340629	335237	364122	326711	372003	390508	343851	367031	370383	380837	379409	18.3778	18.3548	18.4741	18.3177	18.575	18.3914	18.4855	18.4987	18.5388	18.5334	7	7	8	7	5	7	8	7	9	9	8	8	9	9	9	9	9	9	9	9	9
>ENSSSCP00000010408	10	1.08915	0.0378042	RAN	none	GTP-binding nuclear protein Ran; Uncharacterized protein [Source:UniProtKB/TrEMBL;Acc:F1RFQ7]|14|ENSSSCG00000009746|ENSSSCT00000010685	5.85077e+06	6114895	5891608	5472638	5.92394e+06	6.37237e+06	6329280	7001971	6310392	5.90857e+06	6.10096e+06	6.58304e+06	22.5439	22.4902	22.3838	22.4981	22.5936	22.7393	22.5893	22.4944	22.5406	22.6503	9	9	10	9	9	10	9	9	10	10	9	11	10	10	10	10	10	10	10	10	10
>ENSSSCP00000025683	8	1.09324	0.0203514	IDI1	none	Uncharacterized protein [Source:UniProtKB/TrEMBL;Acc:I3LDY2]|10|ENSSSCG00000029066|ENSSSCT00000024912	640122	642884	599867	663107	654631	699806	683449	763838	703576	695434	662391	690149	19.2942	19.1943	19.3389	19.3203	19.3825	19.5429	19.4243	19.4076	19.3373	19.3965	6	6	6	6	5	6	6	7	7	8	8	8	8	8	8	8	8	8	8	8	8
>ENSSSCP00000020663	4	1.09402	0.0287431	BSG	none	basigin (Ok blood group) [Source:HGNC Symbol;Acc:1116]|GL896290.2|ENSSSCG00000027907|ENSSSCT00000028173	618225	632251	597719	636863	606068	676349	661471	636423	751893	706543	679993	621771	19.2701	19.1891	19.2806	19.2091	19.3353	19.2796	19.5202	19.4304	19.3752	19.246	4	4	3	4	3	4	4	3	4	4	4	4	4	4	4	4	4	4	4	4	4
>ENSSSCP00000002078	10	1.09422	0.0327572	CSK	none	c-src tyrosine kinase [Source:HGNC Symbol;Acc:2444]|7|ENSSSCG00000001900|ENSSSCT00000002128	212831	218131	199054	217320	216819	232885	248105	243175	237451	234260	206635	227685	17.7348	17.6028	17.7295	17.7261	17.9206	17.8916	17.8573	17.8378	17.6567	17.7967	8	8	8	8	3	4	9	9	10	9	10	9	10	10	10	10	10	10	10	10	10
>ENSSSCP00000012248	9	1.09466	0.00275793	PSMD6	none	Uncharacterized protein [Source:UniProtKB/TrEMBL;Acc:F1SGF1]|13|ENSSSCG00000011494|ENSSSCT00000012577	360807	358268	356682	353024	375256	394960	391196	385890	399271	399174	391769	402458	18.4507	18.4443	18.4294	18.5175	18.5775	18.5578	18.607	18.6067	18.5796	18.6185	8	7	9	8	4	7	9	8	10	10	10	10	9	9	9	9	9	9	9	9	9
>ENSSSCP00000017885	18	1.09513	0.00660163	NNT	none	Uncharacterized protein [Source:UniProtKB/TrEMBL;Acc:F1SMG3]|16|ENSSSCG00000016877|ENSSSCT00000018381	970783	1.00681e+06	965836	925592	984898	1.06314e+06	1.06919e+06	1.03471e+06	1098642	1.08655e+06	1.06559e+06	1.02414e+06	19.9414	19.8814	19.82	19.9096	20.0281	19.9808	20.0673	20.0513	20.0232	19.966	15	16	14	15	11	13	15	15	18	15	18	17	18	18	18	18	18	18	18	18	18
>ENSSSCP00000018790	9	1.09561	0.0374889	RHOT1	none	ras homolog family member T1 [Source:HGNC Symbol;Acc:21168]|12|ENSSSCG00000017735|ENSSSCT00000019302	152531	162307	147014	144984	155819	167114	175664	173014	170636	173070	158852	151450	17.3084	17.1656	17.1455	17.2495	17.4225	17.4005	17.3806	17.401	17.2773	17.2085	6	6	8	5	3	3	8	8	8	9	9	8	9	9	9	9	9	9	9	9	9
>ENSSSCP00000006535	10	1.09636	0.0470656	DECR1	none	Sus scrofa 2,4-dienoyl CoA reductase 1, mitochondrial (DECR1), nuclear gene encoding mitochondrial protein, mRNA. [Source:RefSeq mRNA;Acc:NM_001190232]|4|ENSSSCG00000006126|ENSSSCT00000006718	425299	433980	429421	406175	431620	466282	506196	450604	507169	483550	432196	417977	18.7273	18.712	18.6317	18.7194	18.9493	18.7815	18.9521	18.8833	18.7213	18.6731	7	8	8	6	6	6	9	9	9	10	10	7	10	10	10	10	10	10	10	10	10
>ENSSSCP00000018786	20	1.0969	0.026634	PSMD11	none	proteasome (prosome, macropain) 26S subunit, non-ATPase, 11 [Source:HGNC Symbol;Acc:9556]|12|ENSSSCG00000017731|ENSSSCT00000019298	925239	868093	941085	911430	980349	1.01489e+06	1.06641e+06	949121	1.05181e+06	1.03821e+06	977698	1.00611e+06	19.7275	19.844	19.7978	19.9029	20.0243	19.8562	20.0044	19.9857	19.899	19.9404	16	18	17	18	13	17	17	18	20	20	21	18	20	20	20	20	20	20	20	20	20
>ENSSSCP00000014316	26	1.09849	0.0164239	THOP1	none	thimet oligopeptidase 1 [Source:HGNC Symbol;Acc:11793]|2|ENSSSCG00000013468|ENSSSCT00000014713	1.01234e+06	1.07572e+06	994617	978388	1.00065e+06	1.11205e+06	1.12218e+06	1.10685e+06	1.11375e+06	1.10458e+06	1.08786e+06	1137062	20.0369	19.9238	19.9	19.9325	20.0979	20.078	20.087	20.0751	20.0531	20.1169	17	21	18	19	17	18	21	19	23	26	23	24	26	26	26	26	26	26	26	26	26
>ENSSSCP00000016632	7	1.099	0.0269441	UBXN4	none	UBX domain protein 4 [Source:HGNC Symbol;Acc:14860]|15|ENSSSCG00000015690|ENSSSCT00000017090	385280	374593	407444	362776	396306	423422	423449	418884	405322	420773	448173	423928	18.515	18.6362	18.4687	18.5963	18.6918	18.6762	18.6287	18.6827	18.7737	18.6935	6	6	5	6	4	6	6	7	7	8	8	7	7	7	7	7	7	7	7	7	7
>ENSSSCP00000010789	9	1.10143	0.0359425	SLC25A1	none	solute carrier family 25 (mitochondrial carrier; citrate transporter), member 1 [Source:HGNC Symbol;Acc:10979]|14|ENSSSCG00000010116|ENSSSCT00000011077	254458	270606	250741	236723	259764	280269	311875	276492	280562	276079	263066	273541	18.0458	17.9358	17.8528	17.9868	18.2506	18.0769	18.098	18.0747	18.0051	18.0614	6	7	8	7	4	5	8	8	7	8	9	8	9	9	9	9	9	9	9	9	9
>ENSSSCP00000025968	8	1.10178	0.00725578	CAPNS1	none	Sus scrofa calpain, small subunit 1 (CAPNS1), mRNA. [Source:RefSeq mRNA;Acc:NM_214318]|6|ENSSSCG00000030149|ENSSSCT00000031590	1.86285e+06	1.86073e+06	1.86758e+06	1.85645e+06	1.86666e+06	2.05246e+06	2.18858e+06	2.08508e+06	2.13575e+06	2010547	1.87889e+06	2.0159e+06	20.8274	20.8327	20.8241	20.832	21.0616	20.9917	21.0263	20.9392	20.8414	20.943	6	8	8	7	8	7	8	9	9	9	7	10	8	8	8	8	8	8	8	8	8
>ENSSSCP00000016841	7	1.10264	0.0299597	PSMD14	none	proteasome (prosome, macropain) 26S subunit, non-ATPase, 14 [Source:HGNC Symbol;Acc:16889]|15|ENSSSCG00000015892|ENSSSCT00000017304	438874	422512	472326	435896	424760	483920	451282	534843	488645	484558	452659	491533	18.6886	18.8494	18.7336	18.6963	18.7837	19.0288	18.8984	18.8863	18.7881	18.9069	4	5	5	3	3	3	5	5	7	9	8	7	7	7	7	7	7	7	7	7	7
>ENSSSCP00000005855	22	1.10286	0.0230189	ECM29	none	KIAA0368 [Source:HGNC Symbol;Acc:29020]|1|ENSSSCG00000005459|ENSSSCT00000006004	298184	289823	286002	312217	304695	328856	354047	326128	312125	316435	305504	358895	18.1448	18.1257	18.2522	18.217	18.4336	18.3151	18.2518	18.2715	18.2208	18.4532	12	11	5	15	8	5	9	14	16	21	21	19	22	22	22	22	22	22	22	22	22
>ENSSSCP00000009105	7	1.10332	0.00134762	PPP1CB	none	Sus scrofa protein phosphatase 1, catalytic subunit, beta isozyme (PPP1CB), mRNA. [Source:RefSeq mRNA;Acc:NM_214184]|3|ENSSSCG00000008540|ENSSSCT00000009345	720306	738939	694348	721582	726356	794732	770972	806807	801290	752501	797340	839481	19.4951	19.4053	19.4608	19.4703	19.5563	19.6219	19.612	19.5213	19.6048	19.6791	7	7	6	7	6	6	7	7	7	7	7	7	7	7	7	7	7	7	7	7	7
>ENSSSCP00000019092	6	1.10386	0.0496392	MAP2K4	none	mitogen-activated protein kinase kinase 4 [Source:HGNC Symbol;Acc:6844]|12|ENSSSCG00000018016|ENSSSCT00000019611	77211.4	77210.7	72503.1	74591.5	84540.3	85230.7	81242.4	82483.4	89013.3	87206.8	86037.8	85400.3	16.2365	16.1458	16.1867	16.3674	16.3099	16.3318	16.4417	16.4122	16.3927	16.382	1	3	3	3	0	0	4	4	6	6	6	4	6	6	6	6	6	6	6	6	6
>ENSSSCP00000001524	19	1.10656	0.0328969	SKIV2L	none	superkiller viralicidic activity 2-like (S. cerevisiae) [Source:HGNC Symbol;Acc:10898]|7|ENSSSCG00000001424|ENSSSCT00000001566	265881	288462	255501	254738	264823	294213	264501	294704	288689	305024	298236	314122	18.138	17.963	17.9587	18.0147	18.0129	18.1689	18.1392	18.2186	18.1861	18.261	9	14	8	9	2	4	14	16	14	16	20	19	19	19	19	19	19	19	19	19	19
>ENSSSCP00000019555	5	1.10859	0.00625032	GBE1	none	Uncharacterized protein [Source:UniProtKB/TrEMBL;Acc:I3L6A4]|13|ENSSSCG00000022789|ENSSSCT00000024901	280533	273437	281748	271172	295776	310997	307696	290934	313946	328498	300832	324079	18.0608	18.104	18.0488	18.1741	18.2311	18.1503	18.2602	18.3255	18.1986	18.306	5	5	4	4	3	3	5	5	5	5	5	5	5	5	5	5	5	5	5	5	5
>ENSSSCP00000003811	16	1.10867	0.00623445	HP1BP3	none	heterochromatin protein 1, binding protein 3 [Source:HGNC Symbol;Acc:24973]|6|ENSSSCG00000003511|ENSSSCT00000003901	961466	983818	998432	931470	932146	1.06594e+06	1123023	1.00145e+06	1.1053e+06	1.00838e+06	1.11381e+06	1.0437e+06	19.908	19.9293	19.8291	19.8302	20.099	19.9337	20.076	19.9436	20.0871	19.9933	13	14	14	14	11	11	15	15	14	17	15	15	16	16	16	16	16	16	16	16	16
>ENSSSCP00000002723	21	1.10948	0.0103022	WARS	none	Uncharacterized protein [Source:UniProtKB/TrEMBL;Acc:F1SAP4]|7|ENSSSCG00000002516|ENSSSCT00000002794	1.26851e+06	1236386	1.26082e+06	1.22316e+06	1.35368e+06	1.40739e+06	1.44187e+06	1.34237e+06	1.47795e+06	1.38752e+06	1.33992e+06	1.4547e+06	20.2377	20.2659	20.2222	20.3685	20.4595	20.3564	20.4952	20.4041	20.3537	20.4723	13	16	15	15	14	13	16	15	17	20	18	17	21	21	21	21	21	21	21	21	21
>ENSSSCP00000010486	5	1.11	3.2467e-05	VPS29	none	vacuolar protein sorting 29 homolog (S. cerevisiae) [Source:HGNC Symbol;Acc:14340]|14|ENSSSCG00000009823|ENSSSCT00000010766	379141	375714	381166	373989	385695	420845	424090	436009	406589	426479	412183	419720	18.5193	18.5401	18.5126	18.5571	18.694	18.734	18.6332	18.7021	18.6529	18.6791	3	4	3	3	3	3	4	4	4	3	5	4	5	5	5	5	5	5	5	5	5
>ENSSSCP00000012138	2	1.11178	0.0141003	APEH	none	Sus scrofa N-acylaminoacyl-peptide hydrolase (APEH), mRNA. [Source:RefSeq mRNA;Acc:NM_213923]|13|ENSSSCG00000011385|ENSSSCT00000012463	69372.7	73835.2	66100.7	70447.4	67107.7	77127.3	77894.6	78435.4	80244.4	75553.7	79480.9	71154.6	16.172	16.0124	16.1043	16.0342	16.2492	16.2592	16.2921	16.2052	16.2783	16.1187	11	13	13	10	10	8	11	13	13	15	14	12	2	2	2	2	2	2	2	2	2
>ENSSSCP00000012468	12	1.11215	0.00377297	GYG1	none	glycogenin 1 [Source:HGNC Symbol;Acc:4699]|13|ENSSSCG00000011698|ENSSSCT00000012806	1.44415e+07	14611974	14196448	14366108	14591568	1.60611e+07	15462263	15786830	17865654	15784209	15678895	15788722	23.8006	23.759	23.7762	23.7986	23.8822	23.9122	24.0907	23.912	23.9023	23.9124	10	13	11	13	10	10	10	12	12	13	12	12	12	12	12	12	12	12	12	12	12
>ENSSSCP00000018561	38	1.11325	0.011777	NPEPPS	none	|12|ENSSSCG00000017513|ENSSSCT00000019067	2.76827e+06	2923248	2662348	2.66135e+06	2.82612e+06	3.08176e+06	3.12314e+06	3.12054e+06	3.16807e+06	3084683	2944584	3049549	21.4791	21.3443	21.3437	21.4304	21.5746	21.5734	21.5952	21.5567	21.4896	21.5402	32	33	31	34	28	26	34	35	37	38	41	35	38	38	38	38	38	38	38	38	38
>ENSSSCP00000014233	17	1.11372	0.0291718	PSMA1	none	Proteasome subunit alpha type [Source:UniProtKB/TrEMBL;Acc:F2Z5L7]|2|ENSSSCG00000013391|ENSSSCT00000014628	2.03675e+06	2.05027e+06	2.11825e+06	1.96039e+06	2.01808e+06	2.26837e+06	2.08293e+06	2.5757e+06	2.04147e+06	2.28918e+06	2.26276e+06	2.3582e+06	20.9674	21.0144	20.9027	20.9446	20.9902	21.2965	20.9612	21.1264	21.1096	21.1693	17	17	17	17	16	15	16	16	16	17	17	17	17	17	17	17	17	17	17	17	17
>ENSSSCP00000005658	2	1.11427	0.0155497	ANXA1	ECM-affiliated Proteins	annexin A1 [Source:HGNC Symbol;Acc:533]|1|ENSSSCG00000005267|ENSSSCT00000005802	4.41696e+06	4637017	4404241	4197743	4428854	4.92169e+06	5112405	4668606	5402678	4.98466e+06	4432745	4.92907e+06	22.1448	22.0705	22.0012	22.0785	22.2856	22.1546	22.3652	22.2491	22.0798	22.2329	20	21	21	21	20	20	20	20	21	21	22	22	2	2	2	2	2	2	2	2	2
>ENSSSCP00000018866	15	1.1169	0.0363881	GLOD4	none	glyoxalase domain containing 4 [Source:HGNC Symbol;Acc:14111]|12|ENSSSCG00000017807|ENSSSCT00000019380	663808	674809	625715	711892	642817	741410	692139	794815	817546	765449	707280	671232	19.3641	19.2551	19.4413	19.294	19.4007	19.6003	19.6409	19.5459	19.4319	19.3565	12	15	13	13	10	11	11	13	14	14	14	13	15	15	15	15	15	15	15	15	15
>ENSSSCP00000003465	7	1.11936	0.0313736	TBC1D17	none	TBC1 domain family, member 17 [Source:HGNC Symbol;Acc:25699]|6|ENSSSCG00000003193|ENSSSCT00000003548	139734	140167	134314	132128	152328	156413	164543	141811	158732	161974	165301	146115	17.0968	17.0352	17.0116	17.2168	17.3281	17.1136	17.2762	17.3054	17.3347	17.1567	2	4	2	3	1	2	5	3	6	5	6	5	7	7	7	7	7	7	7	7	7
>ENSSSCP00000005449	12	1.11965	0.0280212	PSMA3	none	Proteasome subunit alpha type [Source:UniProtKB/TrEMBL;Acc:F1SSL6]|1|ENSSSCG00000005072|ENSSSCT00000005589	1.06759e+06	1.16165e+06	1.00641e+06	1.03448e+06	1.06781e+06	1.19533e+06	1.17975e+06	1.19243e+06	1.23999e+06	1.1414e+06	1.20362e+06	1.21477e+06	20.1477	19.9408	19.9805	20.0262	20.1701	20.1855	20.2419	20.1224	20.1989	20.2123	10	10	11	10	9	8	10	12	11	12	12	12	12	12	12	12	12	12	12	12	12
>ENSSSCP00000015217	3	1.11982	0.0499172	CAMLG	none	calcium modulating ligand [Source:HGNC Symbol;Acc:1471]|2|ENSSSCG00000014306|ENSSSCT00000015630	33078.3	31144.2	35201	31771	34197.1	37041.7	37139.6	33451.3	36373.2	33514.7	39101.4	42670	14.9267	15.1033	14.9554	15.0616	15.1807	15.0298	15.1506	15.0325	15.2549	15.3809	2	1	2	2	0	1	2	3	1	1	1	2	3	3	3	3	3	3	3	3	3
>ENSSSCP00000025493	3	1.12181	0.020653	SEPHS1	none	Uncharacterized protein [Source:UniProtKB/TrEMBL;Acc:I3LN21]|GL894068.1|ENSSSCG00000026582|ENSSSCT00000030446	70103.4	66063.4	67439.6	75461.5	71449.2	78642.5	73969.9	84675.1	78475.3	75035.5	81462	78237.3	16.0116	16.0413	16.2035	16.1246	16.1747	16.3697	16.26	16.1953	16.3138	16.2556	3	3	3	3	1	1	3	3	3	3	4	5	3	3	3	3	3	3	3	3	3
>ENSSSCP00000012096	38	1.12296	0.000509825	MAP4	none	|13|ENSSSCG00000011343|ENSSSCT00000012420	5.45474e+06	5584008	5331373	5394351	5509230	6.12548e+06	5.96563e+06	6.19614e+06	5.83559e+06	5.92374e+06	6.34307e+06	6.48868e+06	22.4129	22.3461	22.363	22.3934	22.5082	22.5629	22.4764	22.4981	22.5967	22.6295	36	36	36	37	25	30	36	37	38	37	39	38	38	38	38	38	38	38	38	38	38
>ENSSSCP00000012664	3	1.12343	0.0204365	GSK3B	none	Sus scrofa glycogen synthase kinase 3 beta (GSK3B), mRNA. [Source:RefSeq mRNA;Acc:NM_001128443]|13|ENSSSCG00000011889|ENSSSCT00000013006	146234	150655	148402	136355	149522	164284	165572	151230	150353	162163	185367	171017	17.2009	17.1791	17.057	17.19	17.3371	17.2064	17.198	17.3071	17.5	17.3838	11	11	11	11	10	10	11	11	11	11	11	11	3	3	3	3	3	3	3	3	3
>ENSSSCP00000027275	6	1.12362	0.0158001	GPX8	none	glutathione peroxidase 8 (putative) [Source:HGNC Symbol;Acc:33100]|16|ENSSSCG00000021973|ENSSSCT00000030961	108280	104879	108600	103439	116202	121665	136658	118262	120385	112761	117532	124393	16.6784	16.7287	16.6584	16.8263	17.0602	16.8516	16.8773	16.7829	16.8427	16.9245	5	6	6	6	2	3	6	6	6	6	6	6	6	6	6	6	6	6	6	6	6
>ENSSSCP00000018896	19	1.12438	0.0243825	PAFAH1B1	none	platelet-activating factor acetylhydrolase 1b, regulatory subunit 1 (45kDa) [Source:HGNC Symbol;Acc:8574]|12|ENSSSCG00000017836|ENSSSCT00000019411	1.74533e+06	1.84392e+06	1.68966e+06	1.71551e+06	1.73223e+06	1.96241e+06	1682065	2.15203e+06	2.01062e+06	1.98721e+06	1.87029e+06	2.07221e+06	20.8143	20.6883	20.7102	20.7242	20.6818	21.0373	20.9392	20.9223	20.8348	20.9827	16	18	16	18	15	15	18	19	19	19	19	18	19	19	19	19	19	19	19	19	19
>ENSSSCP00000011449	7	1.12456	0.0209944	CTBP2	none	Uncharacterized protein [Source:UniProtKB/TrEMBL;Acc:F1SDN6]|14|ENSSSCG00000010739|ENSSSCT00000011751	173541	185500	172915	160159	175589	195156	193911	211084	207531	188986	184884	184542	17.5011	17.3997	17.2891	17.4218	17.565	17.6875	17.663	17.5279	17.4963	17.4936	7	7	4	7	4	4	8	7	7	7	7	7	7	7	7	7	7	7	7	7	7
>ENSSSCP00000000766	9	1.12516	0.0298769	NDUFA9	none	Uncharacterized protein [Source:UniProtKB/TrEMBL;Acc:F1SL07]|5|ENSSSCG00000000719|ENSSSCT00000000782	192168	208549	186779	181407	191938	216219	243048	230757	208174	204651	197369	213318	17.67	17.511	17.4689	17.5503	17.8909	17.816	17.6674	17.6428	17.5905	17.7026	6	5	5	5	5	4	10	7	6	10	9	7	9	9	9	9	9	9	9	9	9
>ENSSSCP00000019779	2	1.12543	0.00302773	SNF8	none	SNF8, ESCRT-II complex subunit [Source:HGNC Symbol;Acc:17028]|12|ENSSSCG00000021461|ENSSSCT00000030250	32070.1	31664.4	33081.6	32955.5	30578.8	36092.6	38647.6	37243.2	36404.2	33278.2	35418.8	35563.8	14.9506	15.0137	15.0082	14.9002	15.2381	15.1847	15.1518	15.0223	15.1122	15.1181	1	2	0	1	1	1	2	2	1	3	2	1	2	2	2	2	2	2	2	2	2
>ENSSSCP00000004831	43	1.12588	0.0267847	MYO6	none	myosin VI [Source:HGNC Symbol;Acc:7605]|1|ENSSSCG00000004478|ENSSSCT00000004948	2.49128e+06	2585058	2.49966e+06	2.40275e+06	2477642	2.80487e+06	2.78404e+06	2.53414e+06	2.71553e+06	2.70796e+06	2.75878e+06	3.3288e+06	21.3018	21.2533	21.1963	21.2405	21.4087	21.2731	21.3728	21.3688	21.3956	21.6666	35	39	36	37	27	29	39	35	40	43	39	41	43	43	43	43	43	43	43	43	43
>ENSSSCP00000024131	19	1.12683	0.000294767	PPP2R1A	none	Sus scrofa protein phosphatase 2, regulatory subunit A, alpha (PPP2R1A), mRNA. [Source:RefSeq mRNA;Acc:NM_214024]|6|ENSSSCG00000024413|ENSSSCT00000030514	3.30484e+06	3.20046e+06	3.4016e+06	3.33534e+06	3.28197e+06	3.72401e+06	3.75904e+06	3.53164e+06	3796072	3774997	3.60226e+06	3.88004e+06	21.6098	21.6978	21.6694	21.6461	21.8419	21.7519	21.8561	21.848	21.7805	21.8876	25	25	26	25	23	24	25	26	25	27	25	25	19	19	19	19	19	19	19	19	19
>ENSSSCP00000016790	8	1.12715	0.00688627	GSR	none	Uncharacterized protein [Source:UniProtKB/TrEMBL;Acc:F1RX66]|15|ENSSSCG00000015844|ENSSSCT00000017252	400185	406363	393140	413229	388009	451070	430263	470922	503071	440810	415182	446172	18.6324	18.5847	18.6566	18.5657	18.7149	18.8451	18.9404	18.7498	18.6634	18.7672	8	10	9	10	8	8	9	11	12	12	11	11	8	8	8	8	8	8	8	8	8
>ENSSSCP00000025669	11	1.12931	0.0456839	GMPR2	none	guanosine monophosphate reductase 2 [Source:HGNC Symbol;Acc:4377]|7|ENSSSCG00000026947|ENSSSCT00000032063	356887	351584	352175	396843	326946	403035	373471	428524	430415	409234	385145	391425	18.4235	18.4259	18.5982	18.3187	18.5106	18.709	18.7154	18.6426	18.555	18.5784	10	13	12	12	10	9	12	12	14	16	16	15	11	11	11	11	11	11	11	11	11
>ENSSSCP00000003425	12	1.13046	0.0431426	DHDH	none	Sus scrofa dimeric dihydrodiol dehydrogenase (SUS2DD), mRNA. [Source:RefSeq mRNA;Acc:NM_214166]|6|ENSSSCG00000003158|ENSSSCT00000003508	616580	669416	577353	572946	646605	697019	738981	726110	724684	692949	624235	675154	19.3525	19.1391	19.128	19.3025	19.4952	19.4698	19.467	19.4024	19.2517	19.3649	11	11	11	12	11	10	11	12	11	12	11	12	12	12	12	12	12	12	12	12	12
>ENSSSCP00000012992	3	1.13099	0.0363795	DMD	none	Sus scrofa dystrophin (DMD), mRNA. [Source:RefSeq mRNA;Acc:NM_001012408]|X|ENSSSCG00000028148|ENSSSCT00000013350	57030	55309.8	58052.7	55759.9	58997.8	64500.4	73101.2	61157.4	72145.2	64467.1	57686.4	58445.2	15.7552	15.8251	15.7669	15.8484	16.1576	15.9002	16.1386	15.9763	15.8159	15.8348	5	5	4	5	1	4	8	6	9	9	8	8	3	3	3	3	3	3	3	3	3
>ENSSSCP00000013919	16	1.13219	0.0364332	TKFC	none	Bifunctional ATP-dependent dihydroxyacetone kinase/FAD-AMP lyase (cyclizing) ATP-dependent dihydroxyacetone kinase FAD-AMP lyase (cyclizing) [Source:UniProtKB/Swiss-Prot;Acc:F1RKQ4]|2|ENSSSCG00000013087|ENSSSCT00000014305	574856	584458	566489	521524	626954	650849	702750	669823	611823	638976	638754	642967	19.1567	19.1117	18.9924	19.258	19.4227	19.3534	19.2228	19.2854	19.2849	19.2944	12	14	11	11	10	10	13	14	14	16	16	15	16	16	16	16	16	16	16	16	16
>ENSSSCP00000008974	37	1.13353	0.0341521	RTN4	none	Uncharacterized protein [Source:UniProtKB/TrEMBL;Acc:F1SQK1]|3|ENSSSCG00000008409|ENSSSCT00000009207	1.5544e+07	14087304	16370774	15688304	16029535	1.76196e+07	18478418	15378636	19022808	17916062	18630622	16291255	23.7479	23.9646	23.9032	23.9342	24.1393	23.8744	24.1812	24.0948	24.1512	23.9576	36	37	35	35	29	32	34	35	36	37	37	37	37	37	37	37	37	37	37	37	37
>ENSSSCP00000012295	7	1.1345	0.046404	ARL8B	none	ADP-ribosylation factor-like 8B [Source:HGNC Symbol;Acc:25564]|13|ENSSSCG00000011535|ENSSSCT00000012625	458433	505643	424561	428795	474733	520094	515866	481415	514588	531228	509796	567671	18.9478	18.6956	18.7099	18.8568	18.9766	18.8769	18.9731	19.019	18.9596	19.1147	6	8	6	6	4	4	5	6	5	6	7	6	7	7	7	7	7	7	7	7	7
>ENSSSCP00000018615	15	1.13461	0.00726617	ACSF2	none	acyl-CoA synthetase family member 2 [Source:HGNC Symbol;Acc:26101]|12|ENSSSCG00000017566|ENSSSCT00000019121	600922	635737	590847	600870	576235	681813	733814	661277	734438	665968	613215	682164	19.2781	19.1724	19.1967	19.1363	19.4851	19.3349	19.4863	19.3451	19.226	19.3798	11	15	13	12	11	11	12	15	14	14	14	15	15	15	15	15	15	15	15	15	15
>ENSSSCP00000015839	9	1.13538	0.00511382	ME3	none	malic enzyme 3, NADP(+)-dependent, mitochondrial [Source:HGNC Symbol;Acc:6985]|9|ENSSSCG00000014919|ENSSSCT00000016275	204342	208406	196504	208426	204034	232006	250835	212310	251109	222648	232568	222565	17.669	17.5842	17.6692	17.6384	17.9364	17.6958	17.938	17.7644	17.8273	17.7639	3	5	6	5	3	4	6	5	6	9	6	9	9	9	9	9	9	9	9	9	9
>ENSSSCP00000007271	5	1.13622	0.00177992	AHCYL1	none	adenosylhomocysteinase-like 1 [Source:HGNC Symbol;Acc:344]|GL892439.2|ENSSSCG00000006816|ENSSSCT00000007467	144189	139017	146095	142271	149375	163831	155565	173201	165090	168513	150433	170183	17.0849	17.1565	17.1183	17.1886	17.2472	17.4021	17.3329	17.3625	17.1988	17.3767	3	5	4	2	3	2	3	6	6	5	6	7	5	5	5	5	5	5	5	5	5
>ENSSSCP00000019017	6	1.13633	0.0317407	ATP1B2	none	ATPase, Na+/K+ transporting, beta 2 polypeptide [Source:HGNC Symbol;Acc:805]|12|ENSSSCG00000017951|ENSSSCT00000019535	173536	185394	176386	162232	170130	197194	192904	204974	221971	209680	182420	171213	17.5002	17.4284	17.3077	17.3763	17.5575	17.6451	17.76	17.6778	17.4769	17.3854	4	5	6	4	1	1	5	6	6	6	6	6	6	6	6	6	6	6	6	6	6
>ENSSSCP00000012264	6	1.1371	0.0159582	ARL6IP5	none	Sus scrofa ADP-ribosylation-like factor 6 interacting protein 5 (ARL6IP5), mRNA. [Source:RefSeq mRNA;Acc:NM_001048073]|13|ENSSSCG00000011507|ENSSSCT00000012593	782761	805477	793753	712802	819012	890081	907344	807753	928883	878431	879332	938744	19.6195	19.5983	19.4431	19.6435	19.7913	19.6236	19.8251	19.7446	19.746	19.8404	5	5	5	5	5	5	5	5	6	6	6	5	6	6	6	6	6	6	6	6	6
>ENSSSCP00000002105	12	1.13721	0.0252802	HEXA	none	hexosaminidase A (alpha polypeptide) [Source:HGNC Symbol;Acc:4878]|7|ENSSSCG00000001927|ENSSSCT00000002156	807424	890182	791359	751918	796237	918209	954776	897732	851769	912424	897838	994714	19.7637	19.594	19.5202	19.6028	19.8648	19.7759	19.7001	19.7993	19.7761	19.9239	9	9	10	8	8	8	10	9	10	13	11	11	12	12	12	12	12	12	12	12	12
>ENSSSCP00000022104	23	1.13838	0.00472788	PARP1	none	poly (ADP-ribose) polymerase 1 [Source:HGNC Symbol;Acc:270]|10|ENSSSCG00000023660|ENSSSCT00000028077	523365	504188	524385	523217	541670	595789	608015	541342	644815	605880	552158	622524	18.9436	19.0003	18.997	19.0471	19.2137	19.0462	19.2985	19.2087	19.0747	19.2478	17	20	17	18	12	13	20	20	22	25	22	21	23	23	23	23	23	23	23	23	23
>ENSSSCP00000004449	5	1.13879	0.0250824	RAB32	none	RAB32, member RAS oncogene family [Source:HGNC Symbol;Acc:9772]|1|ENSSSCG00000004117|ENSSSCT00000004552	62140.7	61149	63909.9	56826.8	66677	70765.5	75363.9	64310.3	70762.1	78244.7	69209.3	66702.6	15.9	15.9638	15.7943	16.0249	16.2016	15.9728	16.1107	16.2557	16.0787	16.0255	2	3	3	3	0	1	4	3	4	5	5	4	5	5	5	5	5	5	5	5	5
>ENSSSCP00000016669	7	1.14026	0.0131434	TSN	none	translin [Source:HGNC Symbol;Acc:12379]|15|ENSSSCG00000015729|ENSSSCT00000017129	470371	503751	440858	457135	479740	536347	543637	567778	546946	497691	487665	574366	18.9424	18.75	18.8023	18.8719	19.0523	19.115	19.061	18.9249	18.8955	19.1316	7	7	7	6	4	6	7	7	7	7	7	7	7	7	7	7	7	7	7	7	7
>ENSSSCP00000009795	13	1.14052	0.0132712	ADH5	none	alcohol dehydrogenase 5 (class III), chi polypeptide [Source:HGNC Symbol;Acc:253]|8|ENSSSCG00000009185|ENSSSCT00000010058	2.24234e+06	2413845	2.08628e+06	2.26914e+06	2200113	2.55743e+06	2473334	2.67594e+06	2.65264e+06	2.52113e+06	2.40456e+06	2.61697e+06	21.2029	20.9925	21.1137	21.0691	21.238	21.3516	21.339	21.2656	21.1973	21.3195	14	14	12	14	13	10	13	14	13	13	14	14	13	13	13	13	13	13	13	13	13
>ENSSSCP00000022446	17	1.14183	0.00501101	HSD17B4	none	hydroxysteroid (17-beta) dehydrogenase 4 [Source:HGNC Symbol;Acc:5213]|2|ENSSSCG00000028431|ENSSSCT00000025027	991932	1.02457e+06	947522	983805	1.01183e+06	1.13262e+06	1.17155e+06	1.04184e+06	1.27485e+06	1.12321e+06	1.09672e+06	1.08757e+06	19.9666	19.8538	19.908	19.9485	20.16	19.9907	20.2819	20.0992	20.0648	20.0527	14	16	14	15	13	12	17	16	17	17	17	17	17	17	17	17	17	17	17	17	17
>ENSSSCP00000013044	6	1.14249	0.00607726	MAOA	none	monoamine oxidase A [Source:HGNC Symbol;Acc:6833]|X|ENSSSCG00000012257|ENSSSCT00000013404	355993	352596	359385	349038	362951	406717	454557	373149	399746	431582	393417	387849	18.4277	18.4552	18.413	18.4694	18.7941	18.5094	18.6087	18.7193	18.5857	18.5651	11	13	12	11	8	9	13	12	13	14	14	13	6	6	6	6	6	6	6	6	6
>ENSSSCP00000005495	2	1.14399	0.01277	PPP2R5E	none	protein phosphatase 2, regulatory subunit B', epsilon isoform [Source:HGNC Symbol;Acc:9313]|1|ENSSSCG00000005113|ENSSSCT00000005636	54571	57388.9	49927.9	56451.3	54515.8	62428.5	64303.8	63858.2	64964.8	62260.3	57044.3	62139.6	15.8085	15.6076	15.7847	15.7344	15.9726	15.9626	15.9874	15.926	15.7998	15.9232	2	2	1	1	2	2	2	2	2	2	2	2	2	2	2	2	2	2	2	2	2
>ENSSSCP00000003340	6	1.1442	0.0265228	CLPTM1	none	cleft lip and palate associated transmembrane protein 1 [Source:HGNC Symbol;Acc:2087]|6|ENSSSCG00000003085|ENSSSCT00000003423	149365	147212	153357	135461	161428	170903	187295	163678	154976	164899	174518	180053	17.1675	17.2265	17.0475	17.3005	17.515	17.3205	17.2417	17.3312	17.413	17.4581	4	5	4	4	3	3	2	4	4	6	6	5	6	6	6	6	6	6	6	6	6
>ENSSSCP00000003880	4	1.14425	0.0215418	WASF2	none	WAS protein family, member 2 [Source:HGNC Symbol;Acc:12733]|6|ENSSSCG00000003577|ENSSSCT00000003971	87737.2	91277	83727.6	82815.1	93129	100393	105677	94031.7	110593	107249	96495.2	88315	16.478	16.3534	16.3376	16.5069	16.6893	16.5209	16.7549	16.7106	16.5582	16.4304	4	5	5	4	3	4	5	2	5	6	5	5	4	4	4	4	4	4	4	4	4
>ENSSSCP00000005677	6	1.14457	0.00314405	GNAQ	none	guanine nucleotide binding protein (G protein), q polypeptide [Source:HGNC Symbol;Acc:4390]|GL895864.2|ENSSSCG00000005285|ENSSSCT00000005821	256803	270566	247728	251157	257762	293930	318553	295862	297879	305775	269582	275926	18.0456	17.9184	17.9382	17.9757	18.2812	18.1746	18.1844	18.2221	18.0404	18.0739	3	6	5	5	4	4	5	6	6	6	6	6	6	6	6	6	6	6	6	6	6
>ENSSSCP00000011701	7	1.14465	0.00880688	DCTN3	none	dynactin 3 (p22) [Source:HGNC Symbol;Acc:2713]|10|ENSSSCG00000010972|ENSSSCT00000012009	215643	215521	230039	216955	200058	246836	229357	260761	255012	252308	243400	240177	17.7175	17.8115	17.727	17.6101	17.8072	17.9924	17.9602	17.9448	17.893	17.8737	7	7	6	5	6	6	6	6	6	7	6	6	7	7	7	7	7	7	7	7	7
>ENSSSCP00000027603	10	1.14496	0.0204261	MAT2B	none	methionine adenosyltransferase II, beta [Source:HGNC Symbol;Acc:6905]|16|ENSSSCG00000021229|ENSSSCT00000025011	410829	443582	387021	427065	385647	470381	426553	509345	462799	482526	465937	475128	18.7588	18.5621	18.7041	18.5569	18.7024	18.9583	18.82	18.8802	18.8298	18.858	6	7	8	7	4	5	8	8	8	10	9	10	10	10	10	10	10	10	10	10	10
>ENSSSCP00000003435	11	1.14561	0.039961	ALDH16A1	none	aldehyde dehydrogenase 16 family, member A1 [Source:HGNC Symbol;Acc:28114]|6|ENSSSCG00000003168|ENSSSCT00000003518	121623	109191	130947	118616	127740	139333	142464	138405	142964	135731	140177	136256	16.7365	16.9986	16.8559	16.9628	17.1202	17.0785	17.1253	17.0504	17.0969	17.056	5	9	7	7	2	4	9	8	9	11	10	6	11	11	11	11	11	11	11	11	11
>ENSSSCP00000017058	2	1.1468	0.00633196	NDUFB3	none	NADH dehydrogenase (ubiquinone) 1 beta subcomplex, 3, 12kDa [Source:HGNC Symbol;Acc:7698]|15|ENSSSCG00000016100|ENSSSCT00000017530	55255.7	56061.6	56608.6	52298.8	56054	63367.2	64194.8	67506.4	62108.7	62692	68407.4	55294.1	15.7747	15.7887	15.6745	15.7745	15.9702	16.0427	15.9225	15.936	16.0619	15.7548	2	2	1	2	1	2	2	2	2	2	2	2	2	2	2	2	2	2	2	2	2
>ENSSSCP00000004914	3	1.14745	0.014586	PPIB	none	Peptidyl-prolyl cis-trans isomerase [Source:UniProtKB/TrEMBL;Acc:F1S0A2]|1|ENSSSCG00000004557|ENSSSCT00000005034	2.02654e+06	2.12515e+06	1.93983e+06	1.88775e+06	2.15344e+06	2.32536e+06	2.33879e+06	2.42547e+06	2.47806e+06	2.35853e+06	2.25666e+06	2.09465e+06	21.0191	20.8875	20.8482	21.0382	21.1573	21.2098	21.2408	21.1695	21.1058	20.9983	8	8	9	8	8	8	8	8	8	8	10	8	3	3	3	3	3	3	3	3	3
>ENSSSCP00000013655	3	1.14822	0.0456512	CEND1	none	Sus scrofa cell cycle exit and neuronal differentiation 1 (CEND1), mRNA. [Source:RefSeq mRNA;Acc:NM_213866]|2|ENSSSCG00000012845|ENSSSCT00000014040	64968.3	66944.6	69306.3	58316	65306.4	74597.6	80587.6	70366.1	62374.7	72784.4	83457.8	78015.1	16.0307	16.0807	15.8316	15.9949	16.2983	16.1026	15.9287	16.1513	16.3488	16.2515	2	2	3	2	2	2	3	2	2	3	3	2	3	3	3	3	3	3	3	3	3
>ENSSSCP00000027165	3	1.14933	0.0328739	CHMP2A	none	charged multivesicular body protein 2A [Source:HGNC Symbol;Acc:30216]|GL895345.1|ENSSSCG00000029362|ENSSSCT00000030728	67203	67653.8	64710.8	65923.1	70524.4	77238.5	92764.4	81144.5	66377.3	73364.2	75852.7	73927.7	16.0459	15.9817	16.0085	16.1058	16.5013	16.3082	16.0184	16.1628	16.2109	16.1738	3	3	3	3	3	2	3	3	3	3	4	3	3	3	3	3	3	3	3	3	3
>ENSSSCP00000014598	9	1.14936	0.00349622	ASNA1	none	arsA arsenite transporter, ATP-binding, homolog 1 (bacterial) [Source:HGNC Symbol;Acc:752]|2|ENSSSCG00000013728|ENSSSCT00000015002	839361	822130	796327	870171	868817	964725	997796	866694	1.04937e+06	952118	965345	957025	19.649	19.603	19.7309	19.7287	19.9284	19.7252	20.0011	19.8608	19.8807	19.8682	9	9	9	9	7	8	9	10	9	9	9	9	9	9	9	9	9	9	9	9	9
>ENSSSCP00000015730	4	1.14944	0.0497387	FOLR2	none	folate receptor 2 [Source:RefSeq peptide;Acc:NP_999018]|9|ENSSSCG00000014812|ENSSSCT00000016163	55683.2	54748.4	55527.6	51167.1	61289.6	64004.7	60081.9	52664.9	72090.2	63707.5	68600.3	66883.3	15.7405	15.7609	15.6429	15.9034	15.8746	15.6846	16.1375	15.9592	16.0659	16.0294	2	3	2	2	0	2	2	3	4	4	4	3	4	4	4	4	4	4	4	4	4
>ENSSSCP00000002547	4	1.15026	0.000202949	ACOT6	none	acyl-CoA thioesterase 6 [Source:HGNC Symbol;Acc:33159]|7|ENSSSCG00000002348|ENSSSCT00000002612	185078	186099	177428	187827	188957	212887	221715	213731	223407	208980	202498	206992	17.5057	17.4369	17.519	17.5277	17.7583	17.7054	17.7693	17.673	17.6275	17.6592	3	4	4	4	2	2	3	3	3	4	5	4	4	4	4	4	4	4	4	4	4
>ENSSSCP00000024491	3	1.15105	0.000379493	TSG101	none	|2|ENSSSCG00000021729|ENSSSCT00000030662	51738.5	53556.9	50557.5	50475.2	52364.3	59553.4	63225.3	59172.2	62149.2	55475.2	58632.9	58665.8	15.7088	15.6256	15.6233	15.6763	15.9482	15.8526	15.9234	15.7596	15.8394	15.8402	3	3	3	3	3	3	3	3	3	4	3	4	3	3	3	3	3	3	3	3	3
>ENSSSCP00000012724	3	1.15221	0.0104544	CD47	none	CD47 molecule [Source:HGNC Symbol;Acc:1682]|13|ENSSSCG00000011942|ENSSSCT00000013068	169585	177723	158564	163207	178848	195398	203449	194649	198227	193685	182663	199716	17.4393	17.2747	17.3163	17.4484	17.6343	17.5705	17.5968	17.5634	17.4788	17.6076	3	3	3	3	3	3	3	3	3	3	3	3	3	3	3	3	3	3	3	3	3
>ENSSSCP00000011981	16	1.15271	0.00573679	DYNC1LI1	none	dynein, cytoplasmic 1, light intermediate chain 1 [Source:HGNC Symbol;Acc:18745]|13|ENSSSCG00000011233|ENSSSCT00000012300	313035	325685	296266	305751	324438	360839	388135	331122	332508	355426	366333	391511	18.3131	18.1765	18.222	18.3076	18.5662	18.337	18.343	18.4392	18.4828	18.5787	7	10	9	10	4	4	10	9	13	16	16	12	16	16	16	16	16	16	16	16	16
>ENSSSCP00000014614	16	1.15313	0.0129954	FARSA	none	phenylalanyl-tRNA synthetase, alpha subunit [Source:HGNC Symbol;Acc:3592]|2|ENSSSCG00000013745|ENSSSCT00000015019	605634	638417	603905	554599	625614	698376	780164	742662	682023	689646	652482	643280	19.2841	19.204	19.0811	19.2549	19.5734	19.5023	19.3795	19.3955	19.3156	19.2951	12	15	15	14	13	11	14	14	15	16	16	16	16	16	16	16	16	16	16	16	16
>ENSSSCP00000014954	10	1.15368	0.0340258	SFXN1	none	Sus scrofa sideroflexin 1 (SFXN1), mRNA. [Source:RefSeq mRNA;Acc:NM_001098602]|2|ENSSSCG00000014063|ENSSSCT00000015362	276992	282958	258731	278919	287360	319560	349627	326407	347693	340719	289969	262947	18.1102	17.9811	18.0895	18.1325	18.4155	18.3163	18.4075	18.3782	18.1455	18.0044	7	8	8	8	7	5	10	8	10	10	10	7	10	10	10	10	10	10	10	10	10
>ENSSSCP00000028230	4	1.1541	0.0365383	RHOA	none	ras homolog family member A [Source:HGNC Symbol;Acc:667]|13|ENSSSCG00000022080|ENSSSCT00000022584	811811	912843	754012	819487	760904	936912	985548	966586	1.01013e+06	910259	863487	885470	19.8	19.5242	19.6444	19.5374	19.9106	19.8825	19.9461	19.7959	19.7198	19.7561	4	4	4	2	2	2	4	4	4	4	4	3	4	4	4	4	4	4	4	4	4
>ENSSSCP00000020252	19	1.15445	0.0367247	GDI1	none	GDP dissociation inhibitor 1 [Source:HGNC Symbol;Acc:4226]|X|ENSSSCG00000030421|ENSSSCT00000027724	8.44333e+06	9386703	8.2786e+06	7577999	8530006	9.74743e+06	9700211	10882761	8950019	9641966	9191247	10118392	23.1622	22.981	22.8534	23.0241	23.2096	23.3755	23.0935	23.2009	23.1318	23.2705	18	19	18	19	16	16	18	19	18	19	19	19	19	19	19	19	19	19	19	19	19
>ENSSSCP00000009855	14	1.15517	0.000138448	COPS4	none	Sus scrofa COP9 constitutive photomorphogenic homolog subunit 4 (Arabidopsis) (COPS4), mRNA. [Source:RefSeq mRNA;Acc:NM_001105304]|8|ENSSSCG00000009241|ENSSSCT00000010121	595991	615505	595966	573891	598601	688469	685339	709689	720571	666393	661117	687706	19.2314	19.1849	19.1304	19.1912	19.3865	19.4368	19.4588	19.346	19.3345	19.3914	13	13	14	13	9	9	13	13	14	18	16	14	14	14	14	14	14	14	14	14	14
>ENSSSCP00000002836	3	1.15596	0.000430145	GSTA4	none	glutathione S-transferase alpha 4 [Source:HGNC Symbol;Acc:4629]|7|ENSSSCG00000002627|ENSSSCT00000002915	118327	114279	118900	117940	122190	136782	136157	136566	145674	125282	135769	141242	16.8022	16.8594	16.8477	16.8988	17.0549	17.0592	17.1524	16.9348	17.0508	17.1078	3	5	4	5	5	2	4	5	4	6	5	3	3	3	3	3	3	3	3	3	3
>ENSSSCP00000008747	3	1.15612	0.00300711	ACTR1B	none	ARP1 actin-related protein 1 homolog B, centractin beta (yeast) [Source:HGNC Symbol;Acc:168]|3|ENSSSCG00000008194|ENSSSCT00000008973	175310	180782	183733	167210	169515	202680	208292	180364	205679	215081	203282	203380	17.4639	17.4873	17.3513	17.3711	17.6682	17.4605	17.65	17.7145	17.6331	17.6338	10	9	9	10	8	8	8	9	8	9	9	9	3	3	3	3	3	3	3	3	3
>ENSSSCP00000009731	23	1.15696	0.00883481	ANK2	none	ankyrin 2, neuronal [Source:HGNC Symbol;Acc:493]|8|ENSSSCG00000009125|ENSSSCT00000009992	447361	440374	470735	438482	439852	517577	530746	432159	525754	543932	531146	541726	18.7484	18.8446	18.7422	18.7467	19.0177	18.7212	19.004	19.0531	19.0187	19.0472	12	19	14	14	5	8	17	14	24	25	23	20	23	23	23	23	23	23	23	23	23
>ENSSSCP00000011466	4	1.15844	0.0106684	MGMT	none	O-6-methylguanine-DNA methyltransferase [Source:HGNC Symbol;Acc:7059]|14|ENSSSCG00000010756|ENSSSCT00000011768	66759.1	63601.3	66210.2	68475.2	68749.8	77336.7	81699.6	89110.2	70156.4	72958	71535.4	78560.5	15.9568	16.0148	16.0633	16.0691	16.318	16.4433	16.0983	16.1548	16.1264	16.2615	3	2	2	2	2	2	3	2	3	5	4	3	4	4	4	4	4	4	4	4	4
>ENSSSCP00000009423	3	1.15916	0.00276305	SCFD2	none	Uncharacterized protein [Source:UniProtKB/TrEMBL;Acc:F1SE65]|8|ENSSSCG00000008836|ENSSSCT00000009672	53134.9	55243.4	49648.5	52729.9	54917.9	61591.7	62078.3	59854.8	62861.9	66775.4	58682.9	59297	15.7535	15.5995	15.6863	15.745	15.9218	15.8692	15.9399	16.027	15.8407	15.8557	3	4	3	3	0	1	4	3	5	5	4	4	3	3	3	3	3	3	3	3	3
>ENSSSCP00000009266	22	1.15971	0.00391825	ADD1	none	Adducin 1 (Alpha); Sterol regulatory element-binding protein 1 [Source:UniProtKB/TrEMBL;Acc:F1S8P9]|8|ENSSSCG00000008692|ENSSSCT00000009510	1.51514e+06	1.61263e+06	1.52269e+06	1.42377e+06	1501444	1.75713e+06	1.82391e+06	1.70866e+06	1.9529e+06	1.69582e+06	1664518	1.69695e+06	20.621	20.5382	20.4413	20.5179	20.7986	20.7044	20.8972	20.6936	20.6667	20.6945	14	19	15	16	11	11	17	18	19	23	24	22	22	22	22	22	22	22	22	22	22
>ENSSSCP00000018179	7	1.16086	0.0192514	GAA	none	glucosidase, alpha; acid [Source:HGNC Symbol;Acc:4065]|12|ENSSSCG00000017156|ENSSSCT00000018680	149376	160089	146230	149601	141585	173405	188331	149517	196760	179163	164378	162284	17.2885	17.1579	17.1908	17.1113	17.5229	17.19	17.5861	17.4509	17.3267	17.3082	8	8	8	8	5	6	8	7	9	9	9	10	7	7	7	7	7	7	7	7	7
>ENSSSCP00000004089	9	1.16202	0.03588	CRYZ	none	Sus scrofa crystallin, zeta (quinone reductase) (LOC733653), mRNA. [Source:RefSeq mRNA;Acc:NM_001044584]|6|ENSSSCG00000003780|ENSSSCT00000004183	249734	241840	248611	281331	227153	290196	286691	290787	291228	284402	277298	310770	17.8837	17.9235	18.1019	17.7933	18.1291	18.1496	18.1518	18.1176	18.0811	18.2455	6	7	7	6	7	5	8	7	9	9	9	7	9	9	9	9	9	9	9	9	9
>ENSSSCP00000028021	6	1.16338	0.0350275	PDXK	none	pyridoxal (pyridoxine, vitamin B6) kinase [Source:HGNC Symbol;Acc:8819]|GL896280.1|ENSSSCG00000024458|ENSSSCT00000022943	223104	246869	198089	229018	218440	259555	253620	264860	274991	277295	239211	247355	17.9134	17.5958	17.8051	17.7369	17.9523	18.0149	18.069	18.0811	17.8679	17.9162	6	7	6	6	6	6	6	6	7	7	6	6	6	6	6	6	6	6	6	6	6
>ENSSSCP00000017131	19	1.16341	0.0489385	ATIC	none	Sus scrofa 5-aminoimidazole-4-carboxamide ribonucleotide formyltransferase/IMP cyclohydrolase (ATIC), mRNA. [Source:RefSeq mRNA;Acc:NM_001130736]|15|ENSSSCG00000016173|ENSSSCT00000017609	801592	919550	764838	722813	799170	932580	991883	994248	903658	855636	899318	950737	19.8106	19.5448	19.4633	19.6081	19.9198	19.9232	19.7854	19.7066	19.7785	19.8587	18	17	16	18	18	16	19	19	19	20	20	19	19	19	19	19	19	19	19	19	19
>ENSSSCP00000007520	7	1.16538	0.0277905	PLCB1	none	Uncharacterized protein [Source:UniProtKB/TrEMBL;Acc:F1SBL1]|17|ENSSSCG00000007056|ENSSSCT00000007727	111257	121829	103913	115223	104063	129657	146762	119973	123375	113940	136097	137792	16.8945	16.665	16.8141	16.6671	17.1631	16.8723	16.9127	16.7979	17.0543	17.0721	4	6	2	4	1	2	5	5	7	7	8	6	7	7	7	7	7	7	7	7	7
>ENSSSCP00000004552	8	1.1655	0.0352882	ECHDC1	none	Uncharacterized protein [Source:UniProtKB/TrEMBL;Acc:F1S2X3]|1|ENSSSCG00000004216|ENSSSCT00000004659	241503	240090	216477	271843	237601	281470	283365	289833	307175	283278	275207	249966	17.8732	17.7239	18.0524	17.8582	18.1123	18.1449	18.2287	18.1119	18.0702	17.9314	8	8	6	10	5	6	10	9	8	10	11	8	8	8	8	8	8	8	8	8	8
>ENSSSCP00000020984	10	1.16712	0.0117844	PSMA2	none	Proteasome subunit alpha type [Source:UniProtKB/TrEMBL;Acc:I3LAB6]|18|ENSSSCG00000020769|ENSSSCT00000025651	1.04199e+06	1.11856e+06	948092	1.06728e+06	1.03404e+06	1.21613e+06	1164720	1.2963e+06	1.21533e+06	1.22759e+06	1.26148e+06	1.13135e+06	20.0932	19.8547	20.0255	19.9799	20.1516	20.306	20.2129	20.2274	20.2667	20.1096	9	8	9	9	9	8	10	10	10	10	10	10	10	10	10	10	10	10	10	10	10
>ENSSSCP00000019235	4	1.16722	0.00580039	PLD3	none	phospholipase D family, member 3 [Source:HGNC Symbol;Acc:17158]|6|ENSSSCG00000025109|ENSSSCT00000023881	810861	822112	867901	751623	801808	946450	961449	940029	898885	1.05291e+06	926620	898805	19.649	19.7272	19.5197	19.6129	19.8749	19.8423	19.7778	20.006	19.8216	19.7776	4	4	4	4	3	4	4	4	4	4	4	4	4	4	4	4	4	4	4	4	4
>ENSSSCP00000001081	9	1.16832	0.0204643	SERPINB1	ECM Regulators	Leukocyte elastase inhibitor; Serpin peptidase inhibitor, clade B (Ovalbumin), member 1 tv1 [Source:UniProtKB/TrEMBL;Acc:F2Z5B1]|7|ENSSSCG00000001011|ENSSSCT00000001103	685517	748896	641622	647183	704368	800903	898187	805631	866735	783485	695517	755865	19.5144	19.2914	19.3038	19.426	19.7767	19.6198	19.7252	19.5795	19.4077	19.5278	13	15	13	14	13	13	15	14	15	16	14	16	9	9	9	9	9	9	9	9	9
>ENSSSCP00000008989	14	1.16853	0.00829878	GTF2A1L	none	Uncharacterized protein [Source:UniProtKB/TrEMBL;Acc:F1SQI6]|3|ENSSSCG00000008422|ENSSSCT00000009223	374659	399649	352081	367275	379633	437800	504313	400095	439652	414516	410973	457248	18.6084	18.4255	18.4865	18.5342	18.944	18.61	18.746	18.6611	18.6487	18.8026	9	11	11	9	7	9	9	10	14	14	13	14	14	14	14	14	14	14	14	14	14
>ENSSSCP00000025060	8	1.16976	0.0312794	GPD1L	none	glycerol-3-phosphate dehydrogenase 1-like [Source:HGNC Symbol;Acc:28956]|13|ENSSSCG00000021977|ENSSSCT00000025190	173269	181935	159715	159855	191573	202683	211773	202484	222559	197530	191395	190358	17.4731	17.2851	17.2864	17.5475	17.6922	17.6275	17.7638	17.5917	17.5462	17.5384	6	5	6	5	5	7	7	8	8	7	7	6	8	8	8	8	8	8	8	8	8
>ENSSSCP00000017198	8	1.16978	0.0225905	CUL3	none	Uncharacterized protein [Source:UniProtKB/TrEMBL;Acc:F1SR61]|15|ENSSSCG00000016234|ENSSSCT00000017677	90644.8	94741.9	86622.2	82607.2	98607.8	106035	106059	107298	108440	107242	108940	98229.1	16.5317	16.4024	16.334	16.5894	16.6945	16.7113	16.7265	16.7105	16.7332	16.5839	7	8	8	11	4	5	8	11	10	12	13	11	8	8	8	8	8	8	8	8	8
>ENSSSCP00000000815	7	1.17022	0.0325283	ATP6V1E1	none	Uncharacterized protein; V-type proton ATPase subunit E 1 [Source:UniProtKB/TrEMBL;Acc:F1SHR3]|5|ENSSSCG00000000767|ENSSSCT00000000831	451729	502069	421944	412921	469980	528622	555762	538036	541932	522853	526216	486932	18.9375	18.6867	18.6555	18.8422	19.0841	19.0373	19.0478	18.996	19.0053	18.8934	8	10	8	9	9	8	9	9	10	11	10	10	7	7	7	7	7	7	7	7	7
>ENSSSCP00000023095	7	1.17266	0.0111652	ABHD12	none	abhydrolase domain containing 12 [Source:HGNC Symbol;Acc:15868]|GL896323.1|ENSSSCG00000026876|ENSSSCT00000030598	142006	148611	137838	142756	138818	166525	201473	167382	152512	162268	157299	158217	17.1812	17.0726	17.1232	17.0828	17.6202	17.3528	17.2186	17.308	17.2631	17.2715	1	5	2	3	1	0	6	4	6	6	5	4	7	7	7	7	7	7	7	7	7
>ENSSSCP00000006000	32	1.17269	0.00242711	HSPA5	none	heat shock 70kDa protein 5 (glucose-regulated protein, 78kDa) [Source:HGNC Symbol;Acc:5238]|1|ENSSSCG00000005601|ENSSSCT00000006159	41855158	40448804	43073428	43465952	40432448	4.90832e+07	48068600	49279604	55012416	51058320	46402188	44678032	25.2696	25.3603	25.3734	25.269	25.5186	25.5545	25.7133	25.6056	25.4677	25.4131	30	32	30	31	27	26	31	32	31	33	33	31	32	32	32	32	32	32	32	32	32
>ENSSSCP00000013824	29	1.17314	0.0107382	CAPN1	none	Calpain-1 catalytic subunit [Source:UniProtKB/Swiss-Prot;Acc:P35750]|2|ENSSSCG00000012999|ENSSSCT00000014210	1.366e+06	1.49771e+06	1.33024e+06	1.27214e+06	1.36392e+06	1.60251e+06	1.62363e+06	1.50217e+06	1.59547e+06	1633617	1558656	1.7015e+06	20.5143	20.3433	20.2788	20.3793	20.6308	20.5186	20.6055	20.6396	20.5719	20.6984	25	25	23	26	14	16	27	24	25	28	28	30	29	29	29	29	29	29	29	29	29
>ENSSSCP00000010005	7	1.17359	0.0257797	VPS36	none	vacuolar protein sorting 36 homolog (S. cerevisiae) [Source:HGNC Symbol;Acc:20312]|11|ENSSSCG00000009376|ENSSSCT00000010273	99916.9	87478.5	106856	103670	101662	117262	117984	114935	132256	114548	115959	107888	16.4166	16.7053	16.6616	16.6334	16.8482	16.8105	17.013	16.8056	16.8233	16.7192	2	6	3	2	1	1	6	5	7	5	7	5	7	7	7	7	7	7	7	7	7
>ENSSSCP00000003820	2	1.17388	0.0238722	CDC42	none	Sus scrofa cell division cycle 42 (GTP binding protein, 25kDa) (CDC42), mRNA. [Source:RefSeq mRNA;Acc:NM_001078680]|6|ENSSSCG00000003520|ENSSSCT00000003910	818473	879687	736714	793224	864267	960793	1.04339e+06	879728	1.09532e+06	961649	894894	889776	19.7466	19.4907	19.5974	19.7211	19.9929	19.7467	20.0629	19.8752	19.7714	19.7631	9	9	9	9	8	8	9	9	8	10	10	9	2	2	2	2	2	2	2	2	2
>ENSSSCP00000024373	2	1.17391	0.0208696	DCDC2C	none	Uncharacterized protein [Source:UniProtKB/TrEMBL;Acc:I3LJW1]|11|ENSSSCG00000030111|ENSSSCT00000024366	462937	463737	461908	505588	420516	543447	591501	500050	584142	591280	473093	520618	18.8229	18.8172	18.9476	18.6818	19.174	18.9317	19.156	19.1735	18.8518	18.9899	2	2	1	1	1	2	2	2	2	2	1	1	2	2	2	2	2	2	2	2	2
>ENSSSCP00000016773	6	1.17403	0.0112199	ERLIN2	none	ER lipid raft associated 2 [Source:HGNC Symbol;Acc:1356]|15|ENSSSCG00000015827|ENSSSCT00000017235	120715	126824	125119	122293	108624	141723	143545	147561	150700	134762	139051	134717	16.9525	16.9329	16.9	16.729	17.1311	17.171	17.2013	17.0401	17.0853	17.0396	8	8	7	7	7	3	9	8	8	9	8	8	6	6	6	6	6	6	6	6	6
>ENSSSCP00000015075	7	1.17403	0.0273282	LNPEP	none	Sus scrofa leucyl/cystinyl aminopeptidase (LNPEP), mRNA. [Source:RefSeq mRNA;Acc:NM_001105291]|2|ENSSSCG00000014173|ENSSSCT00000015485	72542.6	80222.9	65192.2	73567.5	71187.9	85167.5	93862	81877.5	89982.7	90230.6	82461.6	72590.7	16.2917	15.9924	16.1668	16.1193	16.5183	16.3212	16.4574	16.4613	16.3314	16.1475	4	6	6	5	1	4	6	4	6	8	7	5	7	7	7	7	7	7	7	7	7
>ENSSSCP00000020748	4	1.17415	0.00420318	PSMD5	none	proteasome (prosome, macropain) 26S subunit, non-ATPase, 5 [Source:HGNC Symbol;Acc:9563]|1|ENSSSCG00000030054|ENSSSCT00000022255	193186	192991	193830	179271	206653	226829	243974	236778	208622	223956	218444	229199	17.5582	17.5644	17.4518	17.6569	17.8964	17.8532	17.6705	17.7729	17.7369	17.8062	2	3	3	3	2	2	4	4	4	4	4	4	4	4	4	4	4	4	4	4	4
>ENSSSCP00000011584	9	1.17504	0.00411921	SCCPDH	none	Sus scrofa saccharopine dehydrogenase (putative) (SCCPDH), mRNA. [Source:RefSeq mRNA;Acc:NM_001244389]|10|ENSSSCG00000010866|ENSSSCT00000011888	557228	573057	528820	589320	537715	654767	661671	624569	662143	671531	663385	645303	19.1283	19.0124	19.1687	19.0365	19.3358	19.2525	19.3368	19.3571	19.3395	19.2996	11	11	11	10	7	8	11	10	11	11	12	11	9	9	9	9	9	9	9	9	9
>ENSSSCP00000019521	3	1.17588	0.00268949	ALDH1A1	none	Uncharacterized protein [Source:UniProtKB/TrEMBL;Acc:I3L670]|2|ENSSSCG00000022795|ENSSSCT00000027284	611794	659055	587595	589334	611191	719397	768341	729940	735911	699245	650386	732562	19.33	19.1645	19.1687	19.2213	19.5514	19.4774	19.4892	19.4154	19.3109	19.4826	3	3	3	3	3	3	2	3	3	3	3	3	3	3	3	3	3	3	3	3	3
>ENSSSCP00000005264	5	1.1759	0.0268811	VPS4B	none	vacuolar protein sorting 4 homolog B (S. cerevisiae) [Source:HGNC Symbol;Acc:10895]|1|ENSSSCG00000004893|ENSSSCT00000005399	120249	130323	120124	112487	118060	141401	143748	135623	132900	130027	177058	129048	16.9917	16.8742	16.7794	16.8492	17.1332	17.0492	17.02	16.9885	17.4339	16.9776	7	6	4	5	7	7	8	7	7	9	7	8	5	5	5	5	5	5	5	5	5
>ENSSSCP00000011315	20	1.17613	0.00346572	ADD3	none	adducin 3 (gamma) [Source:HGNC Symbol;Acc:245]|14|ENSSSCG00000010621|ENSSSCT00000011617	1.46611e+06	1.52811e+06	1.52019e+06	1356316	1.45981e+06	1.72434e+06	1.84971e+06	1.55245e+06	1816112	1.77068e+06	1.68959e+06	1667487	20.5433	20.5358	20.3713	20.4774	20.8189	20.5661	20.7924	20.7559	20.6882	20.6692	17	18	18	18	11	12	18	18	20	20	19	20	20	20	20	20	20	20	20	20	20
>ENSSSCP00000012223	7	1.17656	0.0463307	ABHD6	none	abhydrolase domain containing 6 [Source:HGNC Symbol;Acc:21398]|13|ENSSSCG00000011470|ENSSSCT00000012552	152605	164694	145148	151113	149464	179549	208702	178160	173140	193482	137598	186211	17.3294	17.1472	17.2053	17.1894	17.6711	17.4428	17.4016	17.5618	17.0701	17.5066	4	6	5	4	1	3	6	5	6	7	8	8	7	7	7	7	7	7	7	7	7
>ENSSSCP00000014476	2	1.17756	0.0481404	TMEM205	none	transmembrane protein 205 [Source:HGNC Symbol;Acc:29631]|2|ENSSSCG00000013622|ENSSSCT00000014877	127253	137684	129636	107853	133838	149848	165335	142904	143895	153192	141423	152338	17.071	16.9841	16.7187	17.0301	17.335	17.1247	17.1347	17.225	17.1097	17.2169	1	2	2	2	1	1	2	1	2	2	3	2	2	2	2	2	2	2	2	2	2
>ENSSSCP00000006018	14	1.17803	0.00278034	STXBP1	none	syntaxin binding protein 1 [Source:HGNC Symbol;Acc:11444]|1|ENSSSCG00000005617|ENSSSCT00000006177	196238	187595	206668	191536	199153	231174	217892	206557	247174	252267	236915	226240	17.5173	17.657	17.5473	17.6035	17.7333	17.6562	17.9152	17.9446	17.854	17.7875	9	12	11	11	3	6	12	12	11	14	13	13	14	14	14	14	14	14	14	14	14
>ENSSSCP00000007190	12	1.17871	0.0184928	ATP1A1	none	Sus scrofa ATPase, Na+/K+ transporting, alpha 1 polypeptide (ATP1A1), mRNA. [Source:RefSeq mRNA;Acc:NM_214249]|4|ENSSSCG00000006740|ENSSSCT00000007385	3.19064e+06	3.3961e+06	3126144	2.89248e+06	3.34784e+06	3.76086e+06	3.83397e+06	3753127	3.66836e+06	3819752	3.7353e+06	3.75463e+06	21.6954	21.576	21.4639	21.6748	21.8704	21.8397	21.8067	21.865	21.8328	21.8402	40	43	40	41	37	38	40	42	42	42	44	42	12	12	12	12	12	12	12	12	12
>ENSSSCP00000010556	17	1.1792	0.00146139	ALDH2	none	Sus scrofa aldehyde dehydrogenase 2 family (mitochondrial) (ALDH2), nuclear gene encoding mitochondrial protein, mRNA. [Source:RefSeq mRNA;Acc:NM_001044611]|14|ENSSSCG00000009889|ENSSSCT00000010839	1.65593e+06	1.56524e+06	1.69892e+06	1.64669e+06	1.71287e+06	1.95267e+06	1.99411e+06	1.80045e+06	2.15107e+06	2.02548e+06	1.92857e+06	1.81634e+06	20.578	20.6962	20.6511	20.708	20.9273	20.7799	21.0366	20.9498	20.8791	20.7926	19	21	19	20	18	18	20	21	21	21	21	21	17	17	17	17	17	17	17	17	17
>ENSSSCP00000011237	2	1.18092	0.0465222	ERLIN1	none	Sus scrofa ER lipid raft associated 1 (ERLIN1), mRNA. [Source:RefSeq mRNA;Acc:NM_001142896]|14|ENSSSCG00000010547|ENSSSCT00000011538	27509.3	23878	29320.6	27974.3	28864.4	32486.2	37417.1	27174	29255.8	31073.5	35474	34522.8	14.5434	14.8396	14.7718	14.817	15.1914	14.7299	14.8364	14.9234	15.1145	15.0753	1	2	2	1	1	1	2	2	2	2	3	3	2	2	2	2	2	2	2	2	2
>ENSSSCP00000019126	11	1.18143	0.0275959	COPS3	none	COP9 signalosome subunit 3 [Source:HGNC Symbol;Acc:2239]|12|ENSSSCG00000018051|ENSSSCT00000019646	243106	256216	243918	213271	259018	287212	290113	284648	288220	295766	271229	293293	17.967	17.896	17.7023	17.9827	18.1463	18.1188	18.1368	18.1741	18.0492	18.162	8	10	9	10	5	4	9	11	10	11	11	12	11	11	11	11	11	11	11	11	11
>ENSSSCP00000009135	21	1.18201	0.0117688	HADHB	none	hydroxyacyl-CoA dehydrogenase/3-ketoacyl-CoA thiolase/enoyl-CoA hydratase (trifunctional protein), beta subunit [Source:HGNC Symbol;Acc:4803]|3|ENSSSCG00000008569|ENSSSCT00000009375	4.88045e+06	5333762	4.68221e+06	4504920	5000925	5.76873e+06	6207761	6.35386e+06	5828112	5.58149e+06	5.19703e+06	5.44412e+06	22.3467	22.1588	22.1031	22.2538	22.5656	22.5992	22.4746	22.4122	22.3093	22.3763	19	19	19	21	19	16	20	19	20	20	20	20	21	21	21	21	21	21	21	21	21
>ENSSSCP00000015889	13	1.18466	0.0257401	ENDOD1	none	endonuclease domain containing 1 [Source:HGNC Symbol;Acc:29129]|9|ENSSSCG00000014965|ENSSSCT00000016326	589259	666306	565218	572616	552894	698069	808695	747794	657889	631976	618377	723681	19.3458	19.1084	19.1272	19.0766	19.6252	19.5123	19.3275	19.2695	19.2381	19.465	11	11	11	8	6	6	12	12	11	12	9	12	13	13	13	13	13	13	13	13	13
>ENSSSCP00000017715	4	1.18514	0.0292183	TNS3	none	tensin 3 [Source:HGNC Symbol;Acc:21616]|18|ENSSSCG00000016725|ENSSSCT00000018206	27289.8	27831.7	26980.9	28633.7	25712.7	32342.1	30909.3	26603.7	33336.2	38313.9	35567.5	29321.8	14.7644	14.7197	14.8054	14.6502	14.9158	14.6993	15.0248	15.2256	15.1183	14.8397	2	4	4	2	1	1	3	3	4	5	4	3	4	4	4	4	4	4	4	4	4
>ENSSSCP00000023192	9	1.18642	0.00782533	LSS	none	lanosterol synthase (2,3-oxidosqualene-lanosterol cyclase) [Source:HGNC Symbol;Acc:6708]|13|ENSSSCG00000021418|ENSSSCT00000027512	268945	291611	255252	252363	276556	319083	325367	315723	318354	342658	313315	299081	18.1537	17.9616	17.9451	18.0772	18.3117	18.2683	18.2803	18.3864	18.2573	18.1902	8	8	8	7	5	6	8	9	10	10	9	9	9	9	9	9	9	9	9	9	9
>ENSSSCP00000007596	8	1.1866	0.0469544	ACSS1	none	acyl-CoA synthetase short-chain family member 1 [Source:HGNC Symbol;Acc:16091]|17|ENSSSCG00000007133|ENSSSCT00000007805	90592.5	102248	81264.9	83067.5	95789.3	107497	110461	99736	115693	113488	115468	90135.7	16.6417	16.3103	16.342	16.5476	16.7532	16.6058	16.8199	16.7922	16.8171	16.4598	4	6	2	3	2	2	6	5	8	8	8	6	8	8	8	8	8	8	8	8	8
>ENSSSCP00000014493	6	1.18675	0.0424718	SLC44A2	none	Choline transporter-like protein 2 [Source:UniProtKB/Swiss-Prot;Acc:F1S584]|2|ENSSSCG00000013639|ENSSSCT00000014894	123894	144320	116908	119401	114948	147031	150720	143876	148373	149496	140870	148853	17.1389	16.835	16.8655	16.8106	17.2015	17.1345	17.1789	17.1898	17.104	17.1835	6	4	3	3	3	3	4	4	5	6	5	6	6	6	6	6	6	6	6	6	6
>ENSSSCP00000018208	9	1.18887	0.00267843	PRPSAP1	none	phosphoribosyl pyrophosphate synthetase-associated protein 1 [Source:HGNC Symbol;Acc:9466]|12|ENSSSCG00000017184|ENSSSCT00000018709	278045	292600	284466	259478	275637	330561	325329	336658	323536	337779	316944	343117	18.1586	18.1179	17.9853	18.0724	18.3115	18.3609	18.3036	18.3657	18.2739	18.3883	8	7	7	7	6	6	6	7	7	8	8	8	9	9	9	9	9	9	9	9	9
>ENSSSCP00000014907	36	1.18931	0.00209394	CANX	none	calnexin [Source:HGNC Symbol;Acc:1473]|2|ENSSSCG00000014020|ENSSSCT00000015315	1.02734e+07	9900053	10997828	10093149	10102569	1.22182e+07	12112685	11882984	12762893	12319775	12247661	11983366	23.239	23.3907	23.2669	23.2682	23.53	23.5024	23.6055	23.5545	23.546	23.5145	32	36	32	34	31	28	35	35	34	37	36	37	36	36	36	36	36	36	36	36	36
>ENSSSCP00000001062	4	1.18942	0.0286593	GMDS	none	GDP-mannose 4,6-dehydratase [Source:HGNC Symbol;Acc:4369]|7|ENSSSCG00000000994|ENSSSCT00000001084	42471.9	47627.6	41479.8	43298.2	37482.1	50516.9	45976.5	50917.7	55531.4	50688.3	51426.2	48561.3	15.5395	15.3401	15.402	15.1939	15.4886	15.6359	15.761	15.6294	15.6502	15.5675	3	4	3	3	2	3	4	4	3	4	4	4	4	4	4	4	4	4	4	4	4
>ENSSSCP00000021972	9	1.1896	0.0181779	LAP3	none	Uncharacterized protein [Source:UniProtKB/TrEMBL;Acc:I3LD43]|8|ENSSSCG00000023604|ENSSSCT00000027356	526655	588966	492532	496401	528721	626508	632630	656422	623789	637353	590848	618007	19.1678	18.9099	18.9211	19.0121	19.271	19.3243	19.2507	19.2817	19.1724	19.2373	6	9	7	8	8	7	9	8	9	9	9	10	9	9	9	9	9	9	9	9	9
>ENSSSCP00000024948	2	1.19202	0.0122569	ECI1	none	enoyl-CoA delta isomerase 1 [Source:HGNC Symbol;Acc:2703]|3|ENSSSCG00000024587|ENSSSCT00000026713	58196	65146.8	56029.9	54332.3	57274.9	69371	72876.8	63116.1	68043.3	73177.5	63399.9	75612.6	15.9914	15.7739	15.7295	15.8056	16.1532	15.9457	16.0542	16.1591	15.9522	16.2063	1	2	1	1	1	1	1	2	2	2	2	2	2	2	2	2	2	2	2	2	2
>ENSSSCP00000013742	15	1.19223	0.0204255	PC	none	Uncharacterized protein [Source:UniProtKB/TrEMBL;Acc:F1RUV6]|2|ENSSSCG00000012925|ENSSSCT00000014128	773667	847059	706835	720698	820078	922387	963787	920617	939870	826935	926312	956802	19.6921	19.431	19.459	19.6454	19.8784	19.8122	19.8421	19.6574	19.8211	19.8679	10	12	12	11	10	9	13	13	15	13	15	14	15	15	15	15	15	15	15	15	15
>ENSSSCP00000018290	3	1.19248	0.00138214	GNA13	none	guanine nucleotide binding protein (G protein), alpha 13 [Source:HGNC Symbol;Acc:4381]|12|ENSSSCG00000017263|ENSSSCT00000018792	61698.6	64500.8	57684.6	62776.1	61832.9	73574.5	74319	68660.9	82873.4	74461.9	70741.1	70390.8	15.977	15.8159	15.9379	15.9161	16.1814	16.0672	16.3386	16.1842	16.1103	16.1031	1	2	1	1	1	1	2	3	2	5	3	3	3	3	3	3	3	3	3	3	3
>ENSSSCP00000004804	25	1.19338	0.00538138	ME1	none	malic enzyme 1, NADP(+)-dependent, cytosolic [Source:HGNC Symbol;Acc:6983]|1|ENSSSCG00000004454|ENSSSCT00000004920	3.83399e+06	4121568	3545467	3.9056e+06	3763334	4575422	4294885	4745532	4.56763e+06	4456476	4668841	4.71916e+06	21.9748	21.7575	21.8971	21.8436	22.0342	22.1781	22.123	22.0875	22.1546	22.1701	27	27	27	26	26	21	27	27	27	27	27	27	25	25	25	25	25	25	25	25	25
>ENSSSCP00000002023	3	1.19343	0.0214349	ANPEP	none	Sus scrofa alanyl (membrane) aminopeptidase (ANPEP), mRNA. [Source:RefSeq mRNA;Acc:NM_214277]|7|ENSSSCG00000001849|ENSSSCT00000002072	1.92897e+06	1.77757e+06	2.08213e+06	1.77022e+06	2.08597e+06	2.3021e+06	1996682	2300315	2.33067e+06	2.2434e+06	2.55216e+06	2.38935e+06	20.7615	20.9896	20.7555	20.9923	20.9292	21.1334	21.1523	21.0973	21.2833	21.1882	1	2	1	3	1	1	2	2	5	3	2	2	3	3	3	3	3	3	3	3	3
>ENSSSCP00000027659	3	1.19411	0.0328957	LRRC47	none	leucine rich repeat containing 47 [Source:HGNC Symbol;Acc:29207]|GL893660.1|ENSSSCG00000021045|ENSSSCT00000022653	23899.1	26096.2	24172.5	23470	21857.7	28538.2	30141.5	29272.9	26921.7	25584.3	24079.3	35229.7	14.6716	14.5611	14.5185	14.4159	14.8795	14.8373	14.7165	14.643	14.5555	15.1045	2	1	0	2	0	1	1	0	2	2	2	1	3	3	3	3	3	3	3	3	3
>ENSSSCP00000020168	7	1.19425	0.0461372	HNMT	none	histamine N-methyltransferase [Source:HGNC Symbol;Acc:5028]|15|ENSSSCG00000024023|ENSSSCT00000023632	163963	153101	161153	151678	189921	195813	206731	152939	200322	221295	192440	201154	17.2241	17.2981	17.2107	17.535	17.6574	17.2226	17.612	17.7556	17.554	17.6179	4	4	5	5	2	3	5	3	6	7	6	4	7	7	7	7	7	7	7	7	7
>ENSSSCP00000020650	12	1.1944	0.00234879	MPI	none	mannose phosphate isomerase [Source:HGNC Symbol;Acc:7216]|7|ENSSSCG00000024990|ENSSSCT00000027731	399049	417425	397086	368834	412852	476623	462620	478706	478803	477457	448996	513156	18.6712	18.5991	18.4926	18.6553	18.8195	18.8688	18.8691	18.865	18.7763	18.969	8	9	8	8	4	4	10	11	11	15	12	12	12	12	12	12	12	12	12	12	12
>ENSSSCP00000003687	21	1.19466	0.0197969	PGD	none	phosphogluconate dehydrogenase [Source:HGNC Symbol;Acc:8891]|6|ENSSSCG00000003402|ENSSSCT00000003774	6.11677e+06	6.75011e+06	5733599	5.57401e+06	6.40936e+06	7.30747e+06	7.75012e+06	7675996	7115495	6.89739e+06	6884286	7521534	22.6865	22.451	22.4103	22.6117	22.8858	22.8719	22.7625	22.7176	22.7149	22.8426	21	22	21	20	19	19	21	20	20	22	21	21	21	21	21	21	21	21	21	21	21
>ENSSSCP00000013565	5	1.19485	0.00163375	NSDHL	none	NAD(P) dependent steroid dehydrogenase-like [Source:HGNC Symbol;Acc:13398]|X|ENSSSCG00000012758|ENSSSCT00000013948	160580	162497	156893	154706	168226	191869	190238	170904	214397	199728	182085	193860	17.3101	17.2594	17.2392	17.36	17.5374	17.3828	17.7099	17.6077	17.4743	17.5647	8	7	7	8	4	4	10	12	10	13	14	10	5	5	5	5	5	5	5	5	5
>ENSSSCP00000017746	7	1.19501	0.000126719	BLVRA	none	biliverdin reductase A [Source:HGNC Symbol;Acc:1062]|18|ENSSSCG00000016756|ENSSSCT00000018238	264385	255858	261707	276508	263467	315943	306458	325300	316232	322808	303966	320897	17.965	17.9976	18.077	18.0073	18.2253	18.3114	18.2706	18.3003	18.2135	18.2917	4	4	5	5	4	4	7	5	7	7	7	7	7	7	7	7	7	7	7	7	7
>ENSSSCP00000014625	12	1.19545	6.37371e-05	MRI1	none	methylthioribose-1-phosphate isomerase 1 [Source:HGNC Symbol;Acc:28469]|2|ENSSSCG00000013756|ENSSSCT00000015030	323821	332290	311278	319746	331969	387112	389981	407340	374697	382110	368885	399657	18.3421	18.2478	18.2866	18.3407	18.573	18.6359	18.5154	18.5436	18.4928	18.6084	9	11	9	9	8	5	9	10	11	10	10	12	12	12	12	12	12	12	12	12	12
>ENSSSCP00000009730	15	1.19595	0.00138549	CAMK2D	none	Sus scrofa calcium/calmodulin-dependent protein kinase II delta (CAMK2D), mRNA. [Source:RefSeq mRNA;Acc:NM_214381]|8|ENSSSCG00000009123|ENSSSCT00000009990	2.29472e+06	2.20133e+06	2.40248e+06	2365516	2209540	2.74436e+06	2815441	2.41447e+06	2.96536e+06	2.87385e+06	2723875	2673155	21.0699	21.1961	21.1737	21.0753	21.4249	21.2033	21.4998	21.4546	21.3772	21.3501	13	15	15	12	11	11	15	14	16	17	17	16	15	15	15	15	15	15	15	15	15
>ENSSSCP00000027926	5	1.19656	0.0212647	NPL	none	Sus scrofa N-acetylneuraminate pyruvate lyase (dihydrodipicolinate synthase) (NPL), mRNA. [Source:RefSeq mRNA;Acc:NM_214071]|GL892421.2|ENSSSCG00000022292|ENSSSCT00000028771	49184.7	47730.6	47431.1	51690.5	49886.5	58852.4	68573.1	50488.7	63189.8	63600.5	57234.1	50028	15.5426	15.5335	15.6576	15.6064	16.0654	15.6237	15.9474	15.9567	15.8046	15.6104	2	4	4	4	0	2	4	3	5	5	5	4	5	5	5	5	5	5	5	5	5
>ENSSSCP00000021901	5	1.19688	0.0232127	DUSP3	none	dual specificity phosphatase 3 [Source:HGNC Symbol;Acc:3069]|12|ENSSSCG00000020744|ENSSSCT00000024088	130857	127983	115576	146009	133860	156620	146966	158329	172740	161110	160790	139784	16.9656	16.8185	17.1557	17.0304	17.1651	17.2726	17.3982	17.2977	17.2948	17.0928	6	4	4	4	3	4	4	6	5	5	5	5	5	5	5	5	5	5	5	5	5
>ENSSSCP00000028154	7	1.19703	0.000269701	MAPK3	none	mitogen-activated protein kinase 3 [Source:HGNC Symbol;Acc:6877]|GL892764.1|ENSSSCG00000021684|ENSSSCT00000028308	425029	447572	421521	408981	422042	508770	537729	499279	535993	521520	473019	485081	18.7718	18.6852	18.6417	18.687	19.0365	18.9295	19.0319	18.9924	18.8515	18.8879	5	6	6	6	3	5	7	7	6	7	7	6	7	7	7	7	7	7	7	7	7
>ENSSSCP00000012897	2	1.19722	0.00592707	PRPS2	none	phosphoribosyl pyrophosphate synthetase 2 [Source:HGNC Symbol;Acc:9465]|X|ENSSSCG00000012116|ENSSSCT00000013253	80493.7	74916.5	84231.1	77028.5	85798.9	96368.6	102458	94210	93165.7	99237.7	97064.7	92076.2	16.193	16.3621	16.2331	16.3887	16.6447	16.5236	16.5075	16.5986	16.5667	16.4905	11	12	10	11	11	7	13	11	12	12	12	13	2	2	2	2	2	2	2	2	2
>ENSSSCP00000009202	13	1.19726	0.0389533	PDIA6	none	Sus scrofa protein disulfide isomerase family A, member 6 (PDIA6), mRNA. [Source:RefSeq mRNA;Acc:NM_001195119]|3|ENSSSCG00000008633|ENSSSCT00000009445	4927093	5662513	4.58708e+06	4.38991e+06	5068861	5.89901e+06	6421575	6.5198e+06	5.92966e+06	5.28831e+06	5.4423e+06	5792441	22.433	22.1291	22.0658	22.2732	22.6145	22.6364	22.4995	22.3344	22.3758	22.4657	11	12	12	13	11	12	12	13	13	13	14	13	13	13	13	13	13	13	13	13	13
>ENSSSCP00000015124	7	1.19832	0.000562292	TMED7	none	transmembrane emp24 protein transport domain containing 7 [Source:HGNC Symbol;Acc:24253]|2|ENSSSCG00000014218|ENSSSCT00000015536	346443	354142	363588	336462	331579	415148	388592	425598	457729	398205	402562	418203	18.434	18.4719	18.3601	18.339	18.5679	18.6991	18.8041	18.6032	18.6189	18.6738	7	7	7	7	5	5	6	7	8	8	9	7	7	7	7	7	7	7	7	7	7
>ENSSSCP00000007498	4	1.19869	0.00194297	NAT1	none	Uncharacterized protein [Source:UniProtKB/TrEMBL;Acc:F1SE16]|17|ENSSSCG00000026893|ENSSSCT00000007705	55417.8	56645.1	51952.9	54054.3	59019	66428.7	64201.8	65266.6	60548	71391.3	65515.8	71648.5	15.7897	15.6649	15.7221	15.8489	15.9703	15.9941	15.8858	16.1235	15.9996	16.1286	3	4	3	4	2	2	3	3	4	5	4	4	4	4	4	4	4	4	4	4	4
>ENSSSCP00000001946	10	1.19883	0.0133502	FAH	none	fumarylacetoacetate hydrolase (fumarylacetoacetase) [Source:HGNC Symbol;Acc:3579]|7|ENSSSCG00000001780|ENSSSCT00000001995	168877	174607	148340	176216	176345	202455	211003	208206	207447	208164	177824	202086	17.4138	17.1785	17.427	17.428	17.6869	17.6677	17.6624	17.6674	17.4401	17.6246	5	5	4	8	4	7	6	8	8	9	8	7	10	10	10	10	10	10	10	10	10
>ENSSSCP00000008317	5	1.19939	0.00915708	PHKG2	none	phosphorylase kinase, gamma 2 (testis) [Source:HGNC Symbol;Acc:8931]|3|ENSSSCG00000007788|ENSSSCT00000008536	63763.8	67993.6	62400.6	63258.4	61402.6	76477.8	74385.1	65294.7	88040.3	81390.4	69712.4	80043.9	16.0531	15.9293	15.949	15.906	16.1827	15.9947	16.4259	16.3126	16.0891	16.2885	4	5	4	3	0	1	5	4	5	5	5	5	5	5	5	5	5	5	5	5	5
>ENSSSCP00000006577	3	1.2001	0.0160563	NDUFB8	none	Sus scrofa NADH dehydrogenase (ubiquinone) 1 beta subcomplex, 8, 19kDa (NDUFB8), nuclear gene encoding mitochondrial protein, mRNA. [Source:RefSeq mRNA;Acc:NM_001144842]|4|ENSSSCG00000006166|ENSSSCT00000006760	58042.7	52079.4	64264.5	56689	59137.7	69656.7	71117.5	68562.9	64089.7	67994.1	74443.7	71732.4	15.6684	15.9717	15.7908	15.8518	16.1179	16.0651	15.9678	16.0531	16.1839	16.1303	2	3	3	3	0	1	3	3	3	3	3	3	3	3	3	3	3	3	3	3	3
>ENSSSCP00000026741	2	1.20024	0.00365432	EMC7	none	Uncharacterized protein [Source:UniProtKB/TrEMBL;Acc:I3LRK6]|GL894821.2|ENSSSCG00000027650|ENSSSCT00000025479	20848.9	20952.7	22206.1	19142.6	21094.2	25023.6	25281.6	27794.4	24488.9	24452.1	25997.7	22126.9	14.3549	14.4387	14.2245	14.3646	14.6258	14.7625	14.5798	14.5777	14.6661	14.4335	1	2	1	1	1	1	2	2	2	2	2	2	2	2	2	2	2	2	2	2	2
>ENSSSCP00000019528	31	1.20132	0.00874346	G6PD	none	glucose-6-phosphate dehydrogenase [Source:HGNC Symbol;Acc:4057]|X|ENSSSCG00000025108|ENSSSCT00000027501	7.21784e+06	8014234	6.74833e+06	6.88394e+06	7224861	8.67093e+06	8946961	8802145	9331256	8.37775e+06	7950292	8617184	22.9341	22.6861	22.7148	22.7845	23.093	23.0694	23.1536	22.9981	22.9226	23.0388	30	30	29	30	28	27	30	29	30	32	32	31	31	31	31	31	31	31	31	31	31
>ENSSSCP00000006950	10	1.20284	0.0165541	GBA	none	Sus scrofa glucosidase, beta, acid (GBA), mRNA. [Source:RefSeq mRNA;Acc:NM_001005730]|4|ENSSSCG00000006522|ENSSSCT00000007143	562412	632804	527050	528270	561524	676489	705378	680486	679511	698955	639859	654746	19.2714	19.0076	19.0109	19.099	19.428	19.3762	19.3741	19.4148	19.2874	19.3206	11	10	10	10	9	8	10	10	11	12	10	10	10	10	10	10	10	10	10	10	10
>ENSSSCP00000009773	6	1.20332	0.00578166	CISD2	none	CDGSH iron sulfur domain 2 [Source:HGNC Symbol;Acc:24212]|8|ENSSSCG00000009164|ENSSSCT00000010036	155703	160639	149031	144524	168620	187362	200190	168957	198790	196471	189533	170228	17.2935	17.1853	17.141	17.3634	17.611	17.3663	17.6009	17.584	17.5321	17.3771	5	6	5	5	5	5	6	5	5	6	6	5	6	6	6	6	6	6	6	6	6
>ENSSSCP00000025987	6	1.20377	0.0103971	MSI1	none	musashi RNA-binding protein 1 [Source:HGNC Symbol;Acc:7330]|14|ENSSSCG00000029365|ENSSSCT00000027694	230335	222273	224776	256892	217397	277269	245211	255947	299805	294942	307629	260079	17.762	17.7781	17.9708	17.73	17.9037	17.9655	18.1937	18.1701	18.2308	17.9886	6	6	6	6	3	4	5	7	6	8	7	6	6	6	6	6	6	6	6	6	6
>ENSSSCP00000007383	14	1.20448	0.000533417	KYAT3	none	cysteine conjugate-beta lyase 2 [Source:HGNC Symbol;Acc:33238]|4|ENSSSCG00000006925|ENSSSCT00000007586	438249	455828	426550	416458	454161	527864	516290	530206	560338	499727	494943	565678	18.7981	18.7024	18.6678	18.7928	18.9778	19.0162	19.0959	18.9308	18.9169	19.1096	11	13	11	9	9	6	13	13	13	14	13	15	14	14	14	14	14	14	14	14	14
>ENSSSCP00000009271	6	1.20593	0.0211747	HTT	none	Sus scrofa huntingtin (HDH), mRNA. [Source:RefSeq mRNA;Acc:NM_213964]|8|ENSSSCG00000008697|ENSSSCT00000009515	37281.9	34541.5	37824.3	39477.7	37284.2	44959.3	47863.8	37986.7	37652.5	50281.4	45330.7	50641	15.076	15.207	15.2688	15.1863	15.5466	15.2132	15.2005	15.6177	15.4682	15.628	1	3	1	3	0	0	3	2	4	9	6	4	6	6	6	6	6	6	6	6	6
>ENSSSCP00000014969	9	1.20644	0.00414063	FAM169A	none	family with sequence similarity 169, member A [Source:HGNC Symbol;Acc:29138]|2|ENSSSCG00000014076|ENSSSCT00000015377	270028	260635	298051	260686	260740	325773	339914	331705	306989	304279	364480	307267	17.9917	18.1852	17.992	17.9923	18.3748	18.3395	18.2278	18.215	18.4755	18.2291	6	11	9	9	4	8	10	9	8	10	12	10	9	9	9	9	9	9	9	9	9
>ENSSSCP00000001078	9	1.20707	0.0443147	BPHL	none	biphenyl hydrolase-like (serine hydrolase) [Source:HGNC Symbol;Acc:1094]|7|ENSSSCG00000001008|ENSSSCT00000001100	165505	146847	168090	194127	152957	199776	183970	188981	218364	199386	215705	192250	17.164	17.3589	17.5666	17.2228	17.4891	17.5279	17.7364	17.6052	17.7187	17.5526	5	7	7	6	5	3	8	8	8	10	10	9	9	9	9	9	9	9	9	9	9
>ENSSSCP00000021805	2	1.20737	0.047513	RABGAP1	none	RAB GTPase activating protein 1 [Source:HGNC Symbol;Acc:17155]|1|ENSSSCG00000022439|ENSSSCT00000025490	34919.7	37107.5	28814.5	37146.2	36610.6	42161	39085.1	42413.7	41845.3	45385.9	41624.4	42611.3	15.1794	14.8145	15.1809	15.16	15.2543	15.3722	15.3528	15.47	15.3451	15.3789	2	2	2	2	0	0	1	2	2	2	2	2	2	2	2	2	2	2	2	2	2
>ENSSSCP00000011206	12	1.20973	0.00937014	PGAM1	none	phosphoglycerate mutase 1 (brain) [Source:HGNC Symbol;Acc:8888]|14|ENSSSCG00000010517|ENSSSCT00000011507	21241686	22939788	21158928	19259514	21608514	2.56966e+07	24144852	29307854	22339058	26317810	24193702	27876386	24.4513	24.3348	24.1991	24.3651	24.5252	24.8048	24.4131	24.6495	24.5281	24.7325	14	16	15	15	12	13	15	16	15	16	16	14	12	12	12	12	12	12	12	12	12
>ENSSSCP00000026286	5	1.21005	1.353e-05	MAPRE3	none	microtubule-associated protein, RP/EB family, member 3 [Source:HGNC Symbol;Acc:6892]|3|ENSSSCG00000029185|ENSSSCT00000027657	161346	166662	156165	160338	162219	195237	196290	205043	197864	192318	185750	194157	17.3466	17.2527	17.2908	17.3076	17.5826	17.6456	17.5941	17.5531	17.503	17.5669	4	5	5	4	3	2	5	5	5	5	5	4	5	5	5	5	5	5	5	5	5
>ENSSSCP00000003953	2	1.21014	0.0231729	RRAGC	none	Ras-related GTP binding C [Source:HGNC Symbol;Acc:19902]|6|ENSSSCG00000003648|ENSSSCT00000004044	16047.8	15585.8	17748.6	16845	14011.9	19420.1	17641.1	18693.7	17967.2	20828.1	19413.2	21977	13.9279	14.1154	14.04	13.7744	14.1067	14.1903	14.1331	14.3462	14.2448	14.4237	5	6	5	5	2	3	5	6	6	7	6	7	2	2	2	2	2	2	2	2	2
>ENSSSCP00000025104	3	1.21039	0.000523491	NQO2	none	NAD(P)H dehydrogenase, quinone 2 [Source:HGNC Symbol;Acc:7856]|7|ENSSSCG00000020758|ENSSSCT00000022316	90521	91587.7	87517.6	95709.1	87269.6	109565	113939	113746	110628	106141	106421	106516	16.4829	16.4173	16.5464	16.4132	16.7979	16.7955	16.7554	16.6956	16.6994	16.7007	2	2	2	2	1	2	2	3	3	3	3	3	3	3	3	3	3	3	3	3	3
>ENSSSCP00000000950	3	1.21065	0.00419667	TMPO	none	Sus scrofa thymopoietin (TMPO), mRNA. [Source:RefSeq mRNA;Acc:NM_001244228]|5|ENSSSCG00000000887|ENSSSCT00000000971	158659	146134	158009	173014	157480	192081	204898	181278	201273	194720	195069	175244	17.1569	17.2696	17.4005	17.2648	17.6445	17.4678	17.6188	17.571	17.5736	17.419	4	6	5	5	4	4	5	4	6	5	5	5	3	3	3	3	3	3	3	3	3
>ENSSSCP00000030660	2	1.21206	0.0298407	UBA1	none	ubiquitin-like modifier activating enzyme 1 [Source:HGNC Symbol;Acc:12469]|X|ENSSSCG00000012270|ENSSSCT00000033113	433949	477307	448418	389254	420816	525971	586049	537322	401164	518118	534555	578616	18.8646	18.7745	18.5704	18.6828	19.1607	19.0354	18.6138	18.9829	19.028	19.1422	2	2	2	2	2	2	2	2	2	2	2	2	2	2	2	2	2	2	2	2	2
>ENSSSCP00000025123	7	1.21218	0.000270838	DHRS2	none	|13|ENSSSCG00000020706|ENSSSCT00000027272	451691	445422	453965	466252	441124	547529	501632	559971	574627	588904	544608	515431	18.7648	18.7922	18.8308	18.7508	18.9363	19.095	19.1323	19.1677	19.0549	18.9754	11	13	12	12	7	8	11	12	13	13	12	13	7	7	7	7	7	7	7	7	7
>ENSSSCP00000018604	6	1.21246	0.0157232	LUC7L3	none	LUC7-like 3 (S. cerevisiae) [Source:HGNC Symbol;Acc:24309]|12|ENSSSCG00000017555|ENSSSCT00000019110	92297.9	105715	88439.5	88649.6	86387.2	111908	123922	109215	108472	106124	105925	117789	16.6898	16.4324	16.4358	16.3985	16.9191	16.7368	16.727	16.6954	16.6927	16.8459	5	5	5	5	5	4	6	5	6	5	5	7	6	6	6	6	6	6	6	6	6
>ENSSSCP00000011226	18	1.21554	0.0149077	GOT1	none	Sus scrofa glutamic-oxaloacetic transaminase 1, soluble (aspartate aminotransferase 1) (GOT1), mRNA. [Source:RefSeq mRNA;Acc:NM_213927]|14|ENSSSCG00000010537|ENSSSCT00000011527	888598	987707	845697	810908	910080	1.08013e+06	1.09442e+06	1.11185e+06	1108061	1.05515e+06	1.01532e+06	1.09597e+06	19.9137	19.6898	19.6292	19.7956	20.0617	20.0845	20.0796	20.009	19.9535	20.0638	15	16	16	17	14	11	16	17	17	18	18	17	18	18	18	18	18	18	18	18	18
>ENSSSCP00000006721	5	1.21594	0.00484457	MPC2	none	mitochondrial pyruvate carrier 2 [Source:HGNC Symbol;Acc:24515]|4|ENSSSCG00000006304|ENSSSCT00000006909	95525.2	94010	96153	89365.2	102573	116153	123297	107430	131714	124268	105261	104949	16.5205	16.553	16.4474	16.6463	16.9118	16.713	17.007	16.9231	16.6836	16.6793	1	2	2	2	2	2	4	3	4	5	3	4	5	5	5	5	5	5	5	5	5
>ENSSSCP00000027024	4	1.21605	0.0232322	SNX9	none	sorting nexin 9 [Source:HGNC Symbol;Acc:14973]|1|ENSSSCG00000030535|ENSSSCT00000030285	38754.4	41702	33178.3	39082.4	41054.9	47127.4	48900.7	47542.6	45518.6	42274.9	49926.4	48601	15.3478	15.018	15.2542	15.3253	15.5776	15.5369	15.4742	15.3675	15.6075	15.5687	2	2	1	2	1	2	3	2	4	2	3	4	4	4	4	4	4	4	4	4	4
>ENSSSCP00000013654	10	1.21632	0.000978088	SLC25A22	none	solute carrier family 25 (mitochondrial carrier: glutamate), member 22 [Source:HGNC Symbol;Acc:19954]|2|ENSSSCG00000012844|ENSSSCT00000014039	432113	427939	426786	428714	445013	525589	535068	456599	538034	567856	543415	512559	18.707	18.7032	18.7097	18.7635	19.0294	18.8006	19.0373	19.1152	19.0517	18.9674	6	7	7	6	5	6	10	7	8	10	10	8	10	10	10	10	10	10	10	10	10
>ENSSSCP00000025100	4	1.21707	0.0198741	AGPAT3	none	1-acylglycerol-3-phosphate O-acyltransferase 3 [Source:HGNC Symbol;Acc:326]|GL893611.1|ENSSSCG00000025285|ENSSSCT00000026028	61264.2	56670.6	55213.7	67518.4	65654.2	74563	81608.9	74875.7	77629.5	66934.8	70394	75935	15.7903	15.7527	16.043	16.0026	16.3164	16.1922	16.2443	16.0305	16.1032	16.2125	3	4	3	1	1	2	3	4	4	4	4	4	4	4	4	4	4	4	4	4	4
>ENSSSCP00000024077	4	1.21715	0.0109865	BLMH	none	Uncharacterized protein [Source:UniProtKB/TrEMBL;Acc:I3LJ20]|12|ENSSSCG00000027883|ENSSSCT00000030616	42322.1	43483.8	39464.6	44014.2	42325.7	51512.4	53608.6	46998	49070.5	64374.6	47082.9	47940	15.4082	15.2683	15.4257	15.3692	15.7102	15.5203	15.5826	15.9742	15.5229	15.5489	1	4	1	2	1	0	3	2	2	4	4	3	4	4	4	4	4	4	4	4	4
>ENSSSCP00000004287	8	1.21743	0.000269175	PPCS	none	phosphopantothenoylcysteine synthetase [Source:HGNC Symbol;Acc:25686]|6|ENSSSCG00000003966|ENSSSCT00000004387	146213	137892	151061	144805	151093	178004	188045	183477	179169	173744	162490	181097	17.0732	17.2048	17.1438	17.2051	17.5207	17.4852	17.451	17.4066	17.31	17.4664	4	7	6	6	4	4	6	7	7	9	8	8	8	8	8	8	8	8	8	8	8
>ENSSSCP00000017003	2	1.21837	0.0117921	HIBCH	none	3-hydroxyisobutyryl-CoA hydrolase [Source:HGNC Symbol;Acc:4908]|15|ENSSSCG00000016049|ENSSSCT00000017474	23354.3	25752.3	21609.6	21564.8	24490.6	28454.3	28121.4	26584.7	26092.8	28697.9	28595.9	32633.2	14.6524	14.3994	14.3964	14.5799	14.7794	14.6983	14.6714	14.8087	14.8035	14.9941	0	0	0	1	0	0	1	3	1	3	1	1	2	2	2	2	2	2	2	2	2
>ENSSSCP00000005011	4	1.21924	0.0174254	GALK2	none	galactokinase 2 [Source:HGNC Symbol;Acc:4119]|1|ENSSSCG00000004651|ENSSSCT00000005136	120959	136751	110569	120057	116458	147477	141365	151003	151207	143291	146180	151819	17.0612	16.7546	16.8734	16.8295	17.1091	17.2042	17.2062	17.1286	17.1574	17.212	3	4	3	4	3	2	3	3	4	5	4	4	4	4	4	4	4	4	4	4	4
>ENSSSCP00000014135	17	1.22063	5.58529e-05	CAT	none	catalase [Source:HGNC Symbol;Acc:1516]|2|ENSSSCG00000013302|ENSSSCT00000014528	424482	415432	427069	439426	416002	518137	556132	492026	535904	523439	484493	516830	18.6643	18.7041	18.7453	18.6662	19.0851	18.9084	19.0316	18.9977	18.8861	18.9793	13	17	13	14	13	10	16	15	18	17	18	17	17	17	17	17	17	17	17	17	17
>ENSSSCP00000003790	10	1.22074	0.0160941	AKR7L	none	aldo-keto reductase family 7-like [Source:HGNC Symbol;Acc:24056]|6|ENSSSCG00000003491|ENSSSCT00000003878	533111	600287	491923	529179	511057	650791	648201	664588	647875	671411	641097	631573	19.1953	18.9081	19.0134	18.9631	19.3061	19.3421	19.3054	19.3568	19.2902	19.2686	9	8	8	9	6	7	10	10	9	10	11	11	10	10	10	10	10	10	10	10	10
>ENSSSCP00000007629	2	1.22118	0.00904445	VPS16	none	vacuolar protein sorting 16 homolog (S. cerevisiae) [Source:HGNC Symbol;Acc:14584]|17|ENSSSCG00000007167|ENSSSCT00000007840	32219.9	33057.8	31534.1	31057.5	33230.3	39346.2	46976.7	37090.2	40077.7	33764.8	35960.5	42207.5	15.0127	14.9446	14.9227	15.0202	15.5197	15.1787	15.2905	15.0432	15.1341	15.3652	2	2	2	4	1	1	2	2	3	4	2	3	2	2	2	2	2	2	2	2	2
>ENSSSCP00000021675	18	1.22124	0.0129506	PFKM	none	phosphofructokinase, muscle [Source:HGNC Symbol;Acc:8877]|5|ENSSSCG00000021129|ENSSSCT00000029955	1.36354e+06	1.41126e+06	1.35639e+06	1.21299e+06	1.47352e+06	1.66522e+06	1.69126e+06	1.59585e+06	1.70006e+06	1.73042e+06	1.64964e+06	1.62407e+06	20.4286	20.3713	20.2101	20.4908	20.6897	20.6059	20.6972	20.7227	20.6537	20.6312	14	18	16	16	14	11	16	15	17	19	18	17	18	18	18	18	18	18	18	18	18
>ENSSSCP00000009137	34	1.22186	0.00823404	HADHA	none	Sus scrofa hydroxyacyl-CoA dehydrogenase/3-ketoacyl-CoA thiolase/enoyl-CoA hydratase (trifunctional protein), alpha subunit (HADHA), nuclear gene encoding mitochondrial protein, mRNA. [Source:RefSeq mRNA;Acc:NM_213962]|3|ENSSSCG00000008571|ENSSSCT00000009377	6.74309e+06	7.46728e+06	6331798	6.25216e+06	6921110	8.23913e+06	8990749	8757042	8227926	7.85005e+06	7806204	7.80279e+06	22.8322	22.5942	22.5759	22.7226	23.1	23.062	22.9721	22.9043	22.8962	22.8956	34	34	34	34	34	30	34	34	35	34	35	34	34	34	34	34	34	34	34	34	34
>ENSSSCP00000011760	2	1.22216	0.0491462	ARHGAP12	none	Rho GTPase activating protein 12 [Source:HGNC Symbol;Acc:16348]|10|ENSSSCG00000011026|ENSSSCT00000012068	28653.9	26398.7	29323.1	29192.6	29701.4	35019.7	34320.3	29933.5	42192.8	36282.9	40776.5	26612.4	14.6882	14.8397	14.8333	14.8582	15.0668	14.8695	15.3647	15.147	15.3155	14.6998	1	1	1	0	0	0	2	1	2	3	3	1	2	2	2	2	2	2	2	2	2
>ENSSSCP00000013601	2	1.22276	0.00282837	RENBP	none	renin binding protein [Source:HGNC Symbol;Acc:9959]|X|ENSSSCG00000012792|ENSSSCT00000013984	50524.1	51914.3	48087.7	47399.2	54695.3	61779	66050.9	57796.4	67418.7	62901.4	58233.2	58273.1	15.6638	15.5534	15.5326	15.7391	16.0113	15.8187	16.0409	15.9408	15.8296	15.8305	7	8	6	7	5	6	6	7	8	11	11	9	2	2	2	2	2	2	2	2	2
>ENSSSCP00000025817	3	1.22422	0.00197076	H1F0	none	Uncharacterized protein [Source:UniProtKB/TrEMBL;Acc:I3LNZ2]|5|ENSSSCG00000030298|ENSSSCT00000022705	359448	347903	358265	366996	364630	440045	437973	399475	513196	454080	421884	413660	18.4083	18.4507	18.4854	18.4761	18.7405	18.6077	18.9692	18.7926	18.6865	18.6581	3	3	3	3	3	3	3	3	3	3	3	3	3	3	3	3	3	3	3	3	3
>ENSSSCP00000010754	4	1.2248	0.00700103	MAPK1	none	mitogen-activated protein kinase 1 [Source:HGNC Symbol;Acc:6871]|14|ENSSSCG00000010081|ENSSSCT00000011042	206828	231507	195098	201658	199050	253323	254903	233998	267402	258739	245579	259319	17.8207	17.5738	17.6216	17.6028	17.9596	17.8361	18.0286	17.9811	17.9058	17.9844	13	17	17	15	13	12	16	16	17	17	17	17	4	4	4	4	4	4	4	4	4
>ENSSSCP00000009209	5	1.22606	0.0162483	IAH1	none	isoamyl acetate-hydrolyzing esterase 1 homolog (S. cerevisiae) [Source:HGNC Symbol;Acc:27696]|3|ENSSSCG00000008640|ENSSSCT00000009452	90676.1	88988.4	83677.9	103398	86639.9	111174	98075.1	119008	125852	110757	118014	95336.4	16.4413	16.3526	16.6578	16.4027	16.5816	16.8607	16.9414	16.757	16.8486	16.5407	4	5	5	5	3	2	4	4	5	7	5	4	5	5	5	5	5	5	5	5	5
>ENSSSCP00000008794	9	1.22669	0.00559813	RETSAT	none	All-trans-retinol 13,14-reductase; Uncharacterized protein [Source:UniProtKB/TrEMBL;Acc:F1SVB2]|3|ENSSSCG00000008237|ENSSSCT00000009020	145376	158015	145639	130964	146885	178331	194212	172232	182027	183504	173396	164614	17.2697	17.152	16.9988	17.1643	17.5673	17.394	17.4738	17.4855	17.4037	17.3287	7	9	8	7	2	3	8	7	10	11	10	10	9	9	9	9	9	9	9	9	9
>ENSSSCP00000012290	4	1.22761	0.000748059	CRBN	none	cereblon [Source:HGNC Symbol;Acc:30185]|13|ENSSSCG00000011530|ENSSSCT00000012620	94823.1	92817.3	96065.8	94243.4	96165.7	116406	117327	120864	128783	108495	105108	117858	16.5021	16.5517	16.5241	16.5532	16.8402	16.883	16.9746	16.7273	16.6815	16.8467	2	3	2	3	2	2	3	3	3	3	4	4	4	4	4	4	4	4	4	4	4
>ENSSSCP00000004124	30	1.22824	0.000821247	PGM1	none	phosphoglucomutase 1 [Source:HGNC Symbol;Acc:8905]|6|ENSSSCG00000003812|ENSSSCT00000004219	6.18239e+06	6.10713e+06	5.94927e+06	6100017	6573138	7.59347e+06	7.78791e+06	7.02185e+06	8329616	8229731	7.17703e+06	7014693	22.5421	22.5043	22.5404	22.6482	22.8928	22.7434	22.9898	22.9724	22.775	22.7419	29	30	29	29	26	28	30	29	31	31	30	30	30	30	30	30	30	30	30	30	30
>ENSSSCP00000021524	2	1.22897	0.000714808	IST1	none	Uncharacterized protein [Source:UniProtKB/TrEMBL;Acc:I3LBV2]|JH118898.1|ENSSSCG00000022587|ENSSSCT00000024143	38467.6	38147.3	37575	36801.2	41346.9	47275.3	50629	45446.1	48507.5	46982.8	45989.6	46097.1	15.2193	15.1975	15.1675	15.3355	15.6277	15.4719	15.5659	15.5198	15.489	15.4924	2	2	2	2	2	2	1	2	2	2	3	2	2	2	2	2	2	2	2	2	2
>ENSSSCP00000019116	13	1.22931	0.00131877	ALDH3A2	none	aldehyde dehydrogenase 3 family, member A2 [Source:HGNC Symbol;Acc:403]|12|ENSSSCG00000018041|ENSSSCT00000019636	1.53186e+06	1.65462e+06	1.46936e+06	1.45127e+06	1552168	1.88312e+06	1951199	1.79329e+06	2017591	1.98276e+06	1.7518e+06	1.80209e+06	20.6581	20.4868	20.4689	20.5659	20.8959	20.7742	20.9442	20.9191	20.7404	20.7812	14	14	13	14	13	13	14	14	14	15	15	14	13	13	13	13	13	13	13	13	13
>ENSSSCP00000013617	3	1.22995	0.0256507	CLIC2	none	chloride intracellular channel 2 [Source:HGNC Symbol;Acc:2063]|X|ENSSSCG00000012808|ENSSSCT00000014001	25891.6	30008.3	24488.3	24744.3	24325.6	31845.4	37555	29321.3	35328.4	33352.4	26864.2	28650.8	14.8731	14.5798	14.5948	14.5702	15.1967	14.8397	15.1085	15.0255	14.7134	14.8063	0	1	1	0	0	0	0	2	2	3	2	1	3	3	3	3	3	3	3	3	3
>ENSSSCP00000016654	4	1.23018	0.0319627	CCDC93	none	coiled-coil domain containing 93 [Source:HGNC Symbol;Acc:25611]|15|ENSSSCG00000015714|ENSSSCT00000017114	40504.1	43360	38045.4	34937.4	45673.6	49827.5	55056.8	48053.8	46106.8	50757.9	47082.3	51907.1	15.4041	15.2154	15.0925	15.4791	15.7486	15.5524	15.4927	15.6313	15.5229	15.6636	1	2	2	2	0	1	4	2	6	4	3	4	4	4	4	4	4	4	4	4	4
>ENSSSCP00000025751	8	1.23113	8.69731e-05	VPS33A	none	Sus scrofa vacuolar protein sorting 33 homolog A (S. cerevisiae) (VPS33A), mRNA. [Source:RefSeq mRNA;Acc:NM_001098604]|14|ENSSSCG00000028005|ENSSSCT00000030351	75502.8	71551.4	77697	76454.2	76308.5	92953.4	99829	85969.8	89789.2	96728.5	93854.5	91549.5	16.1267	16.2456	16.2223	16.2196	16.6072	16.3915	16.4543	16.5617	16.5181	16.4823	4	7	5	4	0	2	6	6	8	10	7	8	8	8	8	8	8	8	8	8	8
>ENSSSCP00000012404	5	1.2314	0.028645	RAB6B	none	RAB6B, member RAS oncogene family [Source:HGNC Symbol;Acc:14902]|13|ENSSSCG00000011638|ENSSSCT00000012738	483393	429829	523319	493857	486564	595249	465208	610362	654760	690520	636711	513932	18.7134	18.9973	18.9137	18.8923	18.8275	19.2193	19.3206	19.3973	19.2803	18.9712	4	5	3	4	3	3	3	3	3	3	4	4	5	5	5	5	5	5	5	5	5
>ENSSSCP00000019227	6	1.23181	0.0063859	DCLK1	none	Uncharacterized protein [Source:UniProtKB/TrEMBL;Acc:I3L5C8]|11|ENSSSCG00000029956|ENSSSCT00000028625	1.18331e+06	1.26548e+06	1.06731e+06	1.22752e+06	1.17293e+06	1.45761e+06	1.67141e+06	1.45758e+06	1.57557e+06	1.44681e+06	1.27565e+06	1.31863e+06	20.2713	20.0255	20.2273	20.1617	20.6726	20.4751	20.5874	20.4644	20.2828	20.3306	6	6	6	6	6	6	6	6	6	6	6	6	6	6	6	6	6	6	6	6	6
>ENSSSCP00000027850	2	1.23186	0.00802036	ARSA	none	arylsulfatase A [Source:HGNC Symbol;Acc:713]|GL896208.1|ENSSSCG00000026856|ENSSSCT00000031954	45335.9	43648.5	43874.5	43690.8	50129.8	55847.5	48238.9	53323.6	53462.9	64178.5	52103.9	63777	15.4136	15.4211	15.415	15.6134	15.5579	15.7025	15.7062	15.9698	15.6691	15.9607	2	1	2	2	0	1	2	2	2	2	2	2	2	2	2	2	2	2	2	2	2
>ENSSSCP00000015200	3	1.23452	0.00258539	UQCRQ	none	ubiquinol-cytochrome c reductase, complex III subunit VII, 9.5kDa [Source:HGNC Symbol;Acc:29594]|2|ENSSSCG00000014289|ENSSSCT00000015612	24150	22742.4	25464.4	22966.4	25426.5	29813.7	29288.8	30211.7	27878.7	30189.3	30679.3	30634.4	14.4731	14.6362	14.4872	14.634	14.8381	14.8828	14.7669	14.8817	14.905	14.9029	1	2	2	1	2	1	3	1	2	3	3	3	3	3	3	3	3	3	3	3	3
>ENSSSCP00000027466	14	1.23471	0.0127534	FOLH1	none	folate hydrolase (prostate-specific membrane antigen) 1 [Source:HGNC Symbol;Acc:3788]|9|ENSSSCG00000027093|ENSSSCT00000024828	509866	560677	487245	457396	534147	629538	712827	659228	664745	641934	569051	529445	19.0968	18.8943	18.8031	19.0269	19.4432	19.3304	19.3424	19.2921	19.1182	19.0141	6	12	7	8	6	7	10	11	12	14	13	11	14	14	14	14	14	14	14	14	14
>ENSSSCP00000021229	6	1.23616	0.0375323	GGCX	none	gamma-glutamyl carboxylase [Source:HGNC Symbol;Acc:4247]|3|ENSSSCG00000027381|ENSSSCT00000031020	139226	154996	126125	136757	139027	172105	229485	174888	162559	138642	156511	170547	17.2419	16.9445	17.0613	17.085	17.808	17.4161	17.3106	17.081	17.2559	17.3798	1	3	1	2	0	1	3	3	5	5	7	7	6	6	6	6	6	6	6	6	6
>ENSSSCP00000017004	6	1.23689	0.0222062	INPP1	none	inositol polyphosphate-1-phosphatase [Source:HGNC Symbol;Acc:6071]|15|ENSSSCG00000016050|ENSSSCT00000017475	133675	153495	136460	117276	127467	165341	181277	176499	155644	150950	153878	173801	17.2278	17.0581	16.8395	16.9598	17.4678	17.4293	17.2479	17.2037	17.2314	17.4071	5	5	5	5	4	3	5	6	6	7	6	5	6	6	6	6	6	6	6	6	6
>ENSSSCP00000004913	3	1.24007	0.000678696	SNX1	none	Uncharacterized protein [Source:UniProtKB/TrEMBL;Acc:F1S0A3]|1|ENSSSCG00000004556|ENSSSCT00000005033	53854	51277.4	54612.9	53777.3	55748.2	66782.5	61210.2	72096.5	62091.6	69453.3	62555.2	73288.3	15.646	15.737	15.7147	15.7666	15.9015	16.1376	15.9221	16.0838	15.9328	16.1613	11	15	13	15	9	10	13	15	15	15	16	13	3	3	3	3	3	3	3	3	3
>ENSSSCP00000004385	14	1.24018	4.8413e-05	EZR	none	ezrin [Source:HGNC Symbol;Acc:12691]|1|ENSSSCG00000004058|ENSSSCT00000004487	2330051	2.22651e+06	2.35389e+06	2309639	2.43017e+06	2.88968e+06	2.9815e+06	2.98044e+06	2.98107e+06	2.94125e+06	2.7464e+06	2707426	21.0864	21.1666	21.1392	21.2126	21.5076	21.5071	21.5074	21.488	21.3891	21.3685	14	14	14	14	12	13	14	13	14	15	15	15	14	14	14	14	14	14	14	14	14
>ENSSSCP00000014392	3	1.24083	0.00208594	TUBB4A	none	tubulin, beta 4A class IVa [Source:HGNC Symbol;Acc:20774]|2|ENSSSCG00000013545|ENSSSCT00000014793	87541	96206.2	83639.3	87272.6	83045.9	108624	106596	98648.1	115074	119928	101726	109770	16.5538	16.3519	16.4132	16.3416	16.7018	16.59	16.8122	16.8718	16.6343	16.7441	2	3	3	3	2	2	3	3	3	3	3	3	3	3	3	3	3	3	3	3	3
>ENSSSCP00000023519	4	1.2441	0.00732316	XPO1	none	Uncharacterized protein [Source:UniProtKB/TrEMBL;Acc:F1SQM6]|3|ENSSSCG00000028100|ENSSSCT00000031751	152122	155232	135985	148902	168369	189256	212423	166590	183308	199996	183129	190087	17.2441	17.0531	17.184	17.3613	17.6966	17.3459	17.4839	17.6096	17.4825	17.5363	3	4	3	3	2	3	4	3	4	4	4	4	4	4	4	4	4	4	4	4	4
>ENSSSCP00000002972	7	1.24475	0.0384836	NQO1	none	NAD(P)H dehydrogenase, quinone 1 [Source:HGNC Symbol;Acc:2874]|6|ENSSSCG00000002754|ENSSSCT00000003051	727686	591960	799721	761974	757088	905788	910278	781031	986793	1.06817e+06	848742	839716	19.1751	19.6091	19.5394	19.5301	19.7959	19.575	19.9124	20.0267	19.695	19.6795	5	7	7	6	4	4	7	6	8	8	7	7	7	7	7	7	7	7	7	7	7
>ENSSSCP00000014703	13	1.24516	0.0102371	ILVBL	none	ilvB (bacterial acetolactate synthase)-like [Source:HGNC Symbol;Acc:6041]|2|ENSSSCG00000013830|ENSSSCT00000015108	262260	283129	281811	235891	248208	326556	315521	271263	346020	346170	367076	313289	18.1111	18.1044	17.8478	17.9212	18.2674	18.0493	18.4005	18.4011	18.4857	18.2571	8	8	5	10	4	5	10	9	12	13	13	13	13	13	13	13	13	13	13	13	13
>ENSSSCP00000022471	3	1.24523	0.00104842	TTC37	none	Uncharacterized protein [Source:UniProtKB/TrEMBL;Acc:I3LEI3]|2|ENSSSCG00000029382|ENSSSCT00000023129	64429	68180.7	65157	59550.5	64828	80228.7	88247.5	77565.8	77085.1	76788.3	73060.9	88624.4	16.0571	15.9916	15.8618	15.9843	16.4293	16.2431	16.2342	16.2286	16.1568	16.4354	2	3	2	2	2	2	3	2	2	3	4	4	3	3	3	3	3	3	3	3	3
>ENSSSCP00000030675	3	1.2464	0.00540444	HUWE1	none	HECT, UBA and WWE domain containing 1, E3 ubiquitin protein ligase [Source:HGNC Symbol;Acc:30892]|X|ENSSSCG00000012328|ENSSSCT00000032835	26123.8	26542.5	27868.2	23175.7	26908.8	32560.7	32398.7	32788.9	29522.6	34167.8	32240.7	34245.7	14.696	14.7663	14.5003	14.7158	14.9836	15.0009	14.8495	15.0604	14.9766	15.0636	3	2	2	2	0	2	2	3	2	3	3	3	3	3	3	3	3	3	3	3	3
>ENSSSCP00000000205	2	1.24641	0.00285849	TUBA1C	none	tubulin, alpha 1c [Source:HGNC Symbol;Acc:20768]|5|ENSSSCG00000000194|ENSSSCT00000000207	1.85806e+06	2.05717e+06	1.82162e+06	1.72714e+06	1.8263e+06	2.31589e+06	2111057	2.3807e+06	2182072	2591830	2281400	2.34829e+06	20.9722	20.7968	20.72	20.8005	21.0095	21.183	21.0573	21.3055	21.1215	21.1632	2	2	2	2	2	2	2	2	2	2	3	2	2	2	2	2	2	2	2	2	2
>ENSSSCP00000013849	20	1.24641	3.61447e-05	PYGB	none	phosphorylase, glycogen; brain [Source:HGNC Symbol;Acc:9723]|GL896323.1|ENSSSCG00000022815|ENSSSCT00000014235	887188	889481	887841	847624	923806	1.1058e+06	1.14828e+06	1.0865e+06	1.10373e+06	1.162e+06	1.06973e+06	1064550	19.7626	19.7599	19.6931	19.8172	20.131	20.0513	20.0739	20.1482	20.0288	20.0218	20	20	18	19	16	16	20	19	19	20	20	23	20	20	20	20	20	20	20	20	20
>ENSSSCP00000021299	6	1.24785	0.00124233	SLC3A2	none	Uncharacterized protein [Source:UniProtKB/TrEMBL;Acc:I3LB80]|2|ENSSSCG00000022404|ENSSSCT00000028449	332526	319689	332680	321512	356224	414943	447464	365756	436994	452059	410962	376422	18.2863	18.3438	18.2945	18.4424	18.7714	18.4805	18.7373	18.7862	18.6486	18.522	13	14	15	15	11	13	15	15	15	14	16	15	6	6	6	6	6	6	6	6	6
>ENSSSCP00000014458	3	1.25087	0.010718	MYO1F	none	myosin IF [Source:HGNC Symbol;Acc:7600]|2|ENSSSCG00000013604|ENSSSCT00000014859	40911.5	41997.9	43481.1	38207.8	39959.3	51174.9	52161.5	50653	40190.2	48229.7	55369.9	60444.9	15.358	15.4081	15.2216	15.2862	15.6707	15.6284	15.2946	15.5576	15.7568	15.8833	0	1	0	1	0	0	1	0	2	5	3	2	3	3	3	3	3	3	3	3	3
>ENSSSCP00000021948	9	1.25228	0.00347772	DAG1	none	dystroglycan 1 (dystrophin-associated glycoprotein 1) [Source:HGNC Symbol;Acc:2666]|JH118489.1|ENSSSCG00000030708|ENSSSCT00000026336	129861	119287	135694	139694	124770	162622	162218	136516	170025	175805	175985	155183	16.8641	17.05	17.0919	16.9289	17.3076	17.0587	17.3754	17.4236	17.4251	17.2436	4	6	5	7	2	4	9	7	9	9	8	9	9	9	9	9	9	9	9	9	9
>ENSSSCP00000023707	2	1.25381	0.0166044	EMC4	none	ER membrane protein complex subunit 4 [Source:HGNC Symbol;Acc:28032]|7|ENSSSCG00000026925|ENSSSCT00000029279	31997.2	34300.3	29798.6	28837.9	35052	40118.4	44414.4	40417.1	34260.2	46840.3	40963.2	33815	15.0659	14.863	14.8157	15.0972	15.4387	15.3027	15.0642	15.5155	15.322	15.0454	1	1	1	2	1	1	2	1	1	2	2	1	2	2	2	2	2	2	2	2	2
>ENSSSCP00000000509	3	1.25422	0.00124279	CAND1	none	Uncharacterized protein [Source:UniProtKB/TrEMBL;Acc:F2Z5R6]|5|ENSSSCG00000028869|ENSSSCT00000000517	363468	376868	370868	329825	376312	455867	466282	466409	447108	440967	419389	495049	18.5237	18.5005	18.3313	18.5216	18.8308	18.8312	18.7703	18.7503	18.6779	18.9172	40	41	41	40	38	38	42	42	46	44	46	44	3	3	3	3	3	3	3	3	3
>ENSSSCP00000008871	14	1.25423	0.0377467	SPR	none	sepiapterin reductase (7,8-dihydrobiopterin:NADP+ oxidoreductase) [Source:HGNC Symbol;Acc:11257]|3|ENSSSCG00000008309|ENSSSCT00000009100	3.10638e+06	3.63653e+06	2760430	2.78111e+06	3.24745e+06	3.89611e+06	4.35925e+06	4557087	3.64723e+06	3.09235e+06	3692966	4.02778e+06	21.7941	21.3965	21.4072	21.6309	22.0556	22.1197	21.7984	21.5603	21.8163	21.9416	14	14	14	14	14	14	14	15	15	14	14	14	14	14	14	14	14	14	14	14	14
>ENSSSCP00000014721	4	1.2563	0.000640741	RAB8A	none	RAB8A, member RAS oncogene family [Source:HGNC Symbol;Acc:7007]|2|ENSSSCG00000013848|ENSSSCT00000015126	33782.3	36091.3	34739.7	31881	32417.4	42440.7	42926.5	39721.1	41318	47372.2	41149.1	42157.3	15.1394	15.0843	14.9604	14.9845	15.3896	15.2776	15.3345	15.5318	15.3286	15.3635	5	6	5	6	3	5	6	6	6	7	7	6	4	4	4	4	4	4	4	4	4
>ENSSSCP00000006355	7	1.25709	0.00204707	NDRG1	none	N-myc downstream regulated 1 [Source:HGNC Symbol;Acc:7679]|4|ENSSSCG00000005944|ENSSSCT00000006527	462778	443697	457320	476512	473584	581752	518463	676631	601367	617642	538213	538194	18.7592	18.8028	18.8622	18.8533	18.9839	19.368	19.1979	19.2364	19.0378	19.0378	5	6	5	4	2	3	7	5	6	9	9	6	7	7	7	7	7	7	7	7	7
>ENSSSCP00000006464	16	1.25732	0.000965922	ATP6V1C1	none	ATPase, H+ transporting, lysosomal 42kDa, V1 subunit C1 [Source:HGNC Symbol;Acc:856]|4|ENSSSCG00000006054|ENSSSCT00000006643	896362	823855	894011	954587	912993	1127009	1085594	1.05083e+06	1.22685e+06	1.10132e+06	1.15141e+06	1146049	19.652	19.7699	19.8645	19.8002	20.0501	20.0031	20.2265	20.0708	20.135	20.1282	12	15	14	15	10	13	16	15	17	18	18	17	16	16	16	16	16	16	16	16	16
>ENSSSCP00000020669	5	1.258	0.000609924	KPNA1	none	Sus scrofa karyopherin alpha 1 (importin alpha 5) (KPNA1), mRNA. [Source:RefSeq mRNA;Acc:NM_001163405]|13|ENSSSCG00000028475|ENSSSCT00000024440	173750	171871	181931	179180	162017	218577	222326	210918	229359	211399	212570	224893	17.391	17.473	17.4511	17.3058	17.7623	17.6863	17.8072	17.6896	17.6976	17.7789	6	5	5	6	3	5	5	5	5	6	5	6	5	5	5	5	5	5	5	5	5
>ENSSSCP00000017767	2	1.25848	0.0241041	VPS41	none	Uncharacterized protein [Source:UniProtKB/TrEMBL;Acc:F1SSB8]|18|ENSSSCG00000016772|ENSSSCT00000018259	14715.8	16410.4	12839.4	13833.1	15780.4	18519.5	16737.8	15144.2	20985.7	21964.7	18368	17916.7	14.0023	13.6483	13.7558	13.9458	14.0308	13.8865	14.3571	14.4229	14.1649	14.129	2	2	2	2	1	0	2	1	2	3	5	2	2	2	2	2	2	2	2	2	2
>ENSSSCP00000017552	7	1.25976	0.000151485	AHCYL2	none	adenosylhomocysteinase-like 2 [Source:HGNC Symbol;Acc:22204]|18|ENSSSCG00000016568|ENSSSCT00000018038	340258	333480	358973	327684	340895	428643	423677	399137	455526	469467	427187	396865	18.3472	18.4535	18.3219	18.379	18.6926	18.6065	18.7972	18.8407	18.7045	18.5983	13	14	13	12	11	11	14	15	17	15	14	13	7	7	7	7	7	7	7	7	7
>ENSSSCP00000011056	30	1.26014	0.000919447	GLUD1	none	Sus scrofa glutamate dehydrogenase 1 (GLUD1), nuclear gene encoding mitochondrial protein, mRNA. [Source:RefSeq mRNA;Acc:NM_001244501]|14|ENSSSCG00000010368|ENSSSCT00000011350	1.4172e+07	13436575	15124590	14161288	13965589	17858671	18120590	17266968	19648982	19286044	17543784	15285658	23.6797	23.8504	23.7554	23.7354	24.1111	24.0415	24.228	24.2011	24.0645	23.8657	29	30	29	29	28	28	30	29	29	30	30	28	30	30	30	30	30	30	30	30	30
>ENSSSCP00000016279	4	1.26098	0.0126525	TMEM106B	none	transmembrane protein 106B [Source:HGNC Symbol;Acc:22407]|9|ENSSSCG00000015351|ENSSSCT00000016725	121081	138191	107821	119260	119051	152681	159469	153150	149894	162597	139414	151560	17.0763	16.7183	16.8638	16.8612	17.2829	17.2246	17.1936	17.3109	17.089	17.2095	3	4	3	3	2	2	4	4	4	4	4	4	4	4	4	4	4	4	4	4	4
>ENSSSCP00000022470	3	1.26165	0.00300978	TMEM120A	none	transmembrane protein 120A [Source:HGNC Symbol;Acc:21697]|GL894019.2|ENSSSCG00000021837|ENSSSCT00000026475	21961.1	21512.9	24094.6	20881.1	21355.9	27707.3	29859.6	26638.2	24771.7	30573.8	30394	24006.2	14.3929	14.5564	14.3499	14.3823	14.8659	14.7012	14.5964	14.9	14.8915	14.5511	2	2	1	2	0	1	3	1	2	3	3	1	3	3	3	3	3	3	3	3	3
>ENSSSCP00000003396	8	1.26175	0.000332995	HSD17B14	none	hydroxysteroid (17-beta) dehydrogenase 14 [Source:HGNC Symbol;Acc:23238]|6|ENSSSCG00000003138|ENSSSCT00000003479	473004	477995	449631	479135	485256	596811	567481	585077	620624	684514	556295	566876	18.8666	18.7784	18.8701	18.8884	19.1142	19.1583	19.2434	19.3847	19.0855	19.1127	7	5	5	6	6	6	7	8	8	8	8	7	8	8	8	8	8	8	8	8	8
>ENSSSCP00000021825	2	1.26242	0.00222608	HMSD	ECM Regulators	histocompatibility (minor) serpin domain containing [Source:HGNC Symbol;Acc:23037]|7|ENSSSCG00000027769|ENSSSCT00000031528	36906.8	38055	37619.5	35715.2	36237.5	46591.8	52641.4	39232.9	44681.7	50921	44959.7	47114.1	15.2158	15.1992	15.1243	15.1452	15.6839	15.2598	15.4474	15.636	15.4563	15.5239	2	2	1	2	1	0	1	1	2	2	2	1	2	2	2	2	2	2	2	2	2
>ENSSSCP00000006906	5	1.26345	0.0109244	NAXE	none	Sus scrofa apolipoprotein A-I binding protein (APOA1BP), mRNA. [Source:RefSeq mRNA;Acc:NM_001078664]|4|ENSSSCG00000006480|ENSSSCT00000007098	143848	145021	151011	123405	155954	181745	204405	160276	193974	186257	162107	183451	17.1459	17.2043	16.913	17.2508	17.6411	17.2902	17.5655	17.5069	17.3066	17.485	4	4	3	4	4	4	4	6	5	7	6	5	5	5	5	5	5	5	5	5	5
>ENSSSCP00000019388	27	1.26806	0.00875263	YARS	none	tyrosyl-tRNA synthetase [Source:HGNC Symbol;Acc:12840]|6|ENSSSCG00000029457|ENSSSCT00000024516	836803	955126	816513	749283	826292	1.06112e+06	1.06909e+06	1.17897e+06	994506	989823	954981	1179339	19.8653	19.6391	19.5152	19.6563	20.028	20.1691	19.9236	19.9168	19.8651	20.1695	20	23	20	20	22	18	23	27	25	26	24	24	27	27	27	27	27	27	27	27	27
>ENSSSCP00000011963	2	1.26848	0.0377281	NGLY1	ECM Regulators	N-glycanase 1 [Source:HGNC Symbol;Acc:17646]|13|ENSSSCG00000011214|ENSSSCT00000012280	16377.2	20008.6	14164.5	16099.4	15236.5	20774.2	21665.8	21155.7	17611.2	18501.2	22072.4	23639.1	14.2883	13.79	13.9747	13.8952	14.4031	14.3688	14.1042	14.1753	14.43	14.5289	0	1	1	1	0	0	2	0	1	1	2	2	2	2	2	2	2	2	2	2	2
>ENSSSCP00000024851	8	1.26857	0.012739	GALE	none	UDP-galactose-4-epimerase [Source:HGNC Symbol;Acc:4116]|6|ENSSSCG00000027827|ENSSSCT00000028713	238196	234013	257500	203952	257320	302170	320410	278463	282355	319706	278040	334043	17.8362	17.9742	17.6379	17.9732	18.2896	18.0871	18.1071	18.2864	18.0849	18.3497	5	8	5	6	4	2	7	7	8	8	11	8	8	8	8	8	8	8	8	8	8
>ENSSSCP00000012199	2	1.26926	0.0259941	SPCS1	none	Sus scrofa signal peptidase complex subunit 1 homolog (S. cerevisiae) (SPCS1), mRNA. [Source:RefSeq mRNA;Acc:NM_001114288]|13|ENSSSCG00000011447|ENSSSCT00000012527	105674	116018	115837	88583	102259	134128	134445	145333	127920	132767	125606	138696	16.824	16.8217	16.4347	16.6419	17.0367	17.149	16.9649	17.0185	16.9385	17.0816	1	2	1	2	1	1	2	1	2	2	2	2	2	2	2	2	2	2	2	2	2
>ENSSSCP00000013830	2	1.27409	0.00913711	VPS51	none	vacuolar protein sorting 51 homolog (S. cerevisiae) [Source:HGNC Symbol;Acc:1172]|2|ENSSSCG00000013005|ENSSSCT00000014216	11578.3	12521	10855.2	11261.8	11675	14751.7	18401.3	12381.4	13049.4	16088.1	14564.5	14025.8	13.6121	13.4061	13.4592	13.5111	14.1675	13.5959	13.6717	13.9737	13.8302	13.7758	2	1	1	2	0	2	2	3	2	3	2	2	2	2	2	2	2	2	2	2	2
>ENSSSCP00000030086	2	1.27472	0.0312175	CP	none	ceruloplasmin (ferroxidase) [Source:HGNC Symbol;Acc:2295]|13|ENSSSCG00000011700|ENSSSCT00000033091	86090.2	73743.2	94664.3	95408.5	80544.6	109741	111066	102183	138012	111999	110562	84625.5	16.1702	16.5305	16.5418	16.2975	16.7611	16.6408	17.0744	16.7731	16.7545	16.3688	15	16	11	13	5	6	19	15	22	21	22	20	2	2	2	2	2	2	2	2	2
>ENSSSCP00000007290	18	1.2761	0.00705735	SARS	none	seryl-tRNA synthetase [Source:HGNC Symbol;Acc:10537]|4|ENSSSCG00000006835|ENSSSCT00000007486	957115	1.08684e+06	890402	884033	967183	1.22138e+06	1.26135e+06	1.36474e+06	1.18255e+06	1.02233e+06	1162342	1.33497e+06	20.0517	19.7641	19.7537	19.8834	20.2665	20.3802	20.1735	19.9634	20.1486	20.3484	14	16	16	15	14	12	17	19	18	17	18	19	18	18	18	18	18	18	18	18	18
>ENSSSCP00000003828	9	1.27694	0.00012825	EPHB2	none	EPH receptor B2 [Source:HGNC Symbol;Acc:3393]|6|ENSSSCG00000003527|ENSSSCT00000003918	142673	152005	143134	139879	135674	182185	188898	177066	185167	195317	165419	181242	17.2138	17.127	17.0938	17.0498	17.5273	17.4339	17.4985	17.5755	17.3358	17.4676	10	9	9	9	5	5	11	12	12	12	14	13	9	9	9	9	9	9	9	9	9
>ENSSSCP00000009389	5	1.27852	0.00621964	GNPDA2	none	glucosamine-6-phosphate deaminase 2 [Source:HGNC Symbol;Acc:21526]|8|ENSSSCG00000008808|ENSSSCT00000009638	79425.2	78767.6	83673.5	69239.8	86019.8	101546	95367.9	106210	99466.2	97980.3	91860.1	118394	16.2653	16.3525	16.0793	16.3924	16.5412	16.6966	16.6019	16.5802	16.4872	16.8532	4	4	4	4	5	2	4	4	5	4	4	4	5	5	5	5	5	5	5	5	5
>ENSSSCP00000017183	14	1.28317	0.0166548	DNPEP	none	aspartyl aminopeptidase [Source:HGNC Symbol;Acc:2981]|15|ENSSSCG00000016220|ENSSSCT00000017661	564861	648383	530105	495134	585823	724815	769516	719374	715063	673053	695362	776520	19.3065	19.0159	18.9175	19.1601	19.5536	19.4564	19.4477	19.3604	19.4074	19.5667	8	9	8	9	10	7	10	11	9	12	14	11	14	14	14	14	14	14	14	14	14
>ENSSSCP00000010581	5	1.28324	0.0107416	ACADS	none	acyl-CoA dehydrogenase, C-2 to C-3 short chain [Source:HGNC Symbol;Acc:90]|14|ENSSSCG00000009916|ENSSSCT00000010866	103948	117878	96273.6	107998	93641	133390	143426	137816	126338	137636	133236	121888	16.8469	16.5549	16.7206	16.5149	17.13	17.0724	16.9469	17.0705	17.0236	16.8952	3	4	3	3	3	3	5	4	5	6	7	5	5	5	5	5	5	5	5	5	5
>ENSSSCP00000018597	2	1.28353	0.0391496	PHB	none	Uncharacterized protein [Source:UniProtKB/TrEMBL;Acc:F2Z543]|12|ENSSSCG00000017549|ENSSSCT00000019103	266441	309476	224873	261461	269951	341986	273877	309836	293877	395899	434437	343988	18.2395	17.7788	17.9962	18.0423	18.0632	18.2411	18.1649	18.5948	18.7288	18.392	17	17	16	17	16	14	16	17	17	17	17	17	2	2	2	2	2	2	2	2	2
>ENSSSCP00000016385	29	1.28661	0.000480378	PDIA4	none	protein disulfide isomerase family A, member 4 [Source:HGNC Symbol;Acc:30167]|9|ENSSSCG00000015453|ENSSSCT00000016835	4.30919e+06	3.95244e+06	4.55135e+06	4435851	4.29713e+06	5544270	5.50074e+06	5336560	6285136	5.42212e+06	5.49215e+06	5.2289e+06	21.9143	22.1179	22.0808	22.0349	22.3912	22.3475	22.5835	22.3704	22.3889	22.3181	29	29	27	27	27	26	29	28	30	31	31	31	29	29	29	29	29	29	29	29	29
>ENSSSCP00000003192	3	1.28698	0.0345219	YIF1B	none	Yip1 interacting factor homolog B (S. cerevisiae) [Source:HGNC Symbol;Acc:30511]|6|ENSSSCG00000002952|ENSSSCT00000003274	40407.8	36214.7	47803	34876.2	42737.1	52004.1	52432.9	52503.4	47390	53210.6	53583.2	52904.3	15.1443	15.5448	15.09	15.3832	15.6782	15.6801	15.5323	15.6994	15.7095	15.6911	2	3	2	2	0	1	2	3	3	3	3	3	3	3	3	3	3	3	3	3	3
>ENSSSCP00000005068	8	1.28816	0.0209202	CKMT1A	none	Uncharacterized protein [Source:UniProtKB/TrEMBL;Acc:F1SI77]|1|ENSSSCG00000004703|ENSSSCT00000005194	302800	304493	287755	353155	265797	390055	384041	374647	385371	402577	402478	391215	18.2161	18.1345	18.4299	18.02	18.5509	18.5152	18.5559	18.6189	18.6185	18.5776	5	9	7	7	6	6	9	9	8	9	11	10	8	8	8	8	8	8	8	8	8
>ENSSSCP00000013355	5	1.29166	0.00036403	PRPS1L1	none	phosphoribosyl pyrophosphate synthetase 1-like 1 [Source:HGNC Symbol;Acc:9463]|X|ENSSSCG00000012560|ENSSSCT00000013733	284697	281584	308312	280598	268293	367732	368306	376269	410391	375094	344108	332224	18.1032	18.234	18.0981	18.0335	18.4905	18.5214	18.6466	18.5169	18.3925	18.3418	5	5	4	5	4	3	4	4	5	5	4	4	5	5	5	5	5	5	5	5	5
>ENSSSCP00000007005	2	1.2918	0.0126328	INTS3	none	integrator complex subunit 3 [Source:HGNC Symbol;Acc:26153]|4|ENSSSCG00000006571|ENSSSCT00000007199	8071.97	8041.48	9305.91	7278.06	7662.42	10427.4	11535.2	11966.8	10895.9	10141.7	9962.28	8062.62	12.9732	13.1839	12.8293	12.9036	13.4938	13.5467	13.4115	13.308	13.2823	12.977	1	2	1	1	0	0	2	2	2	2	2	2	2	2	2	2	2	2	2	2	2
>ENSSSCP00000018553	2	1.29185	0.00594586	FBXL20	none	F-box and leucine-rich repeat protein 20 [Source:HGNC Symbol;Acc:24679]|12|ENSSSCG00000017506|ENSSSCT00000019059	16696.6	19000.5	15059.9	16628.1	16098	21569.5	23645.6	22213.7	22551.6	20755	19468.7	20782.3	14.2137	13.8784	14.0213	13.9746	14.5293	14.4392	14.4609	14.3412	14.2489	14.3431	1	2	0	1	0	0	1	1	2	2	3	1	2	2	2	2	2	2	2	2	2
>ENSSSCP00000005999	6	1.2919	0.00805546	PPP6C	none	protein phosphatase 6, catalytic subunit [Source:HGNC Symbol;Acc:9323]|1|ENSSSCG00000005600|ENSSSCT00000006158	146163	140175	153265	159257	131953	188827	221335	180077	169689	152043	202418	207399	17.0969	17.2257	17.281	17.0097	17.7559	17.4583	17.3725	17.2141	17.627	17.6621	5	2	3	3	1	1	4	5	4	5	5	4	6	6	6	6	6	6	6	6	6
>ENSSSCP00000002471	9	1.29208	0.0397611	SPTB	none	spectrin, beta, erythrocytic [Source:HGNC Symbol;Acc:11274]|7|ENSSSCG00000002277|ENSSSCT00000002535	406901	503522	383356	340349	400377	525750	510177	629022	506097	487814	469104	552287	18.9417	18.5483	18.3767	18.611	18.9606	19.2628	18.9491	18.896	18.8395	19.0751	7	8	8	7	5	6	8	7	9	9	10	10	9	9	9	9	9	9	9	9	9
>ENSSSCP00000002337	3	1.29519	0.0128235	OSGEP	none	O-sialoglycoprotein endopeptidase [Source:HGNC Symbol;Acc:18028]|7|ENSSSCG00000002138|ENSSSCT00000002392	30329.8	28835.5	35459.4	30304.9	26719.3	39282.7	42792.2	36251.8	41987.1	35436.6	34672.7	44556	14.8156	15.1139	14.8873	14.7056	15.3851	15.1458	15.3577	15.113	15.0815	15.4433	1	3	2	2	1	1	2	3	2	3	2	3	3	3	3	3	3	3	3	3	3
>ENSSSCP00000008354	4	1.29639	4.63889e-05	LCMT1	none	Uncharacterized protein [Source:UniProtKB/TrEMBL;Acc:F1RFE3]|3|ENSSSCG00000007826|ENSSSCT00000008575	45627.6	47373.2	42959	46382.7	45795.6	59151.4	59625	62597.5	57491	55596.5	55565.7	64032.5	15.5318	15.3907	15.5013	15.4829	15.8636	15.9338	15.811	15.7627	15.7619	15.9665	3	1	1	1	1	0	4	2	3	5	3	2	4	4	4	4	4	4	4	4	4
>ENSSSCP00000021227	3	1.29821	0.0405694	HSPB11	none	heat shock protein family B (small), member 11 [Source:HGNC Symbol;Acc:25019]|6|ENSSSCG00000026264|ENSSSCT00000031201	48806.1	37933.9	51618.8	53723.2	51948.6	63360.8	56821.1	62046	51751.4	76551.9	61309.8	71684.5	15.2112	15.6556	15.7133	15.6648	15.7941	15.921	15.6593	16.2241	15.9038	16.1294	1	1	1	1	0	0	2	1	1	3	2	2	3	3	3	3	3	3	3	3	3
>ENSSSCP00000019829	2	1.29831	0.000850581	RHOG	none	ras homolog family member G [Source:HGNC Symbol;Acc:672]|9|ENSSSCG00000029426|ENSSSCT00000031648	110550	105535	113454	114462	108751	143528	165751	145524	130620	154447	127181	137647	16.6874	16.7917	16.8045	16.7307	17.3387	17.1509	16.995	17.2368	16.9565	17.0706	1	2	1	2	1	1	1	1	3	3	2	2	2	2	2	2	2	2	2	2	2
>ENSSSCP00000007298	5	1.30043	0.000349313	STXBP3	none	syntaxin binding protein 3 [Source:HGNC Symbol;Acc:11446]|4|ENSSSCG00000006843|ENSSSCT00000007494	79834.8	85515.5	75966.1	75989.2	81868.4	103820	114881	95815.4	102302	110973	94184.5	104763	16.3839	16.2131	16.2135	16.321	16.8098	16.548	16.6425	16.7598	16.5232	16.6768	4	5	3	3	3	4	5	5	4	5	5	5	5	5	5	5	5	5	5	5	5
>ENSSSCP00000026614	6	1.30098	0.000935684	AIMP2	none	aminoacyl tRNA synthetase complex-interacting multifunctional protein 2 [Source:HGNC Symbol;Acc:20609]|3|ENSSSCG00000024245|ENSSSCT00000026197	213788	203102	234686	213178	204185	278134	297260	293805	266338	264526	274250	272624	17.6318	17.8404	17.7017	17.6395	18.1814	18.1645	18.0229	18.0131	18.0651	18.0566	6	6	6	5	4	3	6	6	6	6	6	7	6	6	6	6	6	6	6	6	6
>ENSSSCP00000020686	4	1.30433	0.0237931	PITHD1	none	PITH (C-terminal proteasome-interacting domain of thioredoxin-like) domain containing 1 [Source:HGNC Symbol;Acc:25022]|6|ENSSSCG00000023495|ENSSSCT00000024525	73093.5	60849.7	84613.4	68651.5	78259.5	95337.9	78633	88303.2	103598	104010	101279	96204.7	15.893	16.3686	16.067	16.256	16.2628	16.4302	16.6606	16.6664	16.628	16.5538	1	4	3	3	1	1	3	4	4	5	4	4	4	4	4	4	4	4	4	4	4
>ENSSSCP00000016258	12	1.30482	0.00212271	PON2	none	Sus scrofa paraoxonase 2 (PON2), mRNA. [Source:RefSeq mRNA;Acc:NM_001123223]|9|ENSSSCG00000015331|ENSSSCT00000016704	1.19322e+06	1.07384e+06	1.30497e+06	1.21549e+06	1.1786e+06	1.55695e+06	1520697	1399096	1.67565e+06	1.57987e+06	1.57437e+06	1.592e+06	20.0343	20.3156	20.2131	20.1686	20.5363	20.4161	20.6763	20.5914	20.5863	20.6024	9	12	11	11	10	9	12	12	12	12	14	12	12	12	12	12	12	12	12	12	12
>ENSSSCP00000022919	2	1.30536	0.00163187	PIP4K2B	none	phosphatidylinositol-5-phosphate 4-kinase, type II, beta [Source:HGNC Symbol;Acc:8998]|GL896426.1|ENSSSCG00000030279|ENSSSCT00000030134	19090.6	17555.6	20880.5	19575.2	18351	24920.1	29437.5	25812	25385.1	23081.5	22240.5	23564	14.0996	14.3499	14.2567	14.1636	14.8454	14.6558	14.6317	14.4945	14.4409	14.5243	2	3	1	3	0	0	2	2	3	4	3	3	2	2	2	2	2	2	2	2	2
>ENSSSCP00000019302	5	1.30635	0.0140366	HSD17B11	none	hydroxysteroid (17-beta) dehydrogenase 11 [Source:HGNC Symbol;Acc:22960]|8|ENSSSCG00000024493|ENSSSCT00000028706	25428.7	25529.1	21592.2	25713.5	28879.9	33218.8	32419.1	32344.2	36547.7	33754.8	33389.3	30857.5	14.6399	14.3982	14.6502	14.8178	14.9846	14.9812	15.1575	15.0428	15.0271	14.9133	1	3	5	4	1	0	5	3	6	6	7	5	5	5	5	5	5	5	5	5	5
>ENSSSCP00000021561	5	1.30741	0.0224021	MDH1	none	malate dehydrogenase, cytoplasmic [Source:RefSeq peptide;Acc:NP_999039]|GL894216.2|ENSSSCG00000023670|ENSSSCT00000032466	6.24652e+06	7.49449e+06	5629803	5.62696e+06	6.23482e+06	8.16677e+06	8515723	8535728	8.2334e+06	8146751	7.47937e+06	8089660	22.8374	22.4247	22.4239	22.5719	23.0217	23.0251	22.9731	22.9578	22.8345	22.9476	13	13	13	12	13	12	12	13	12	13	13	13	5	5	5	5	5	5	5	5	5
>ENSSSCP00000017118	8	1.30816	0.0214274	LANCL1	none	Uncharacterized protein [Source:UniProtKB/TrEMBL;Acc:F1SSS1]|JH118435.1|ENSSSCG00000016158|ENSSSCT00000017593	337348	388907	284545	336011	339929	441305	454772	439110	441249	456071	432598	424028	18.5691	18.1183	18.3581	18.3749	18.7948	18.7442	18.7512	18.7989	18.7227	18.6938	6	9	6	7	5	5	8	8	10	9	10	10	8	8	8	8	8	8	8	8	8
>ENSSSCP00000008264	2	1.31111	0.00371326	ASL	none	Uncharacterized protein [Source:UniProtKB/TrEMBL;Acc:F1RJH8]|3|ENSSSCG00000007738|ENSSSCT00000008483	14711.6	13812.8	14977.8	13646.2	16409.8	19288.6	18170.8	18709.6	23393.9	20368.3	16188.8	18900	13.7537	13.8705	13.7362	14.0023	14.1493	14.1915	14.5138	14.314	13.9827	14.2061	0	1	0	0	0	0	2	0	2	2	3	2	2	2	2	2	2	2	2	2	2
>ENSSSCP00000000906	33	1.3114	4.80899e-05	HSP90B1	none	heat shock protein 90kDa beta (Grp94), member 1 [Source:HGNC Symbol;Acc:12028]|5|ENSSSCG00000000849|ENSSSCT00000000926	1.38625e+07	13504758	14125134	13777835	14042444	1.81793e+07	18780308	18044900	19900236	18513546	17141220	16695765	23.687	23.7518	23.7158	23.7433	24.1627	24.1051	24.2463	24.1421	24.031	23.993	33	33	32	33	30	29	33	33	33	33	33	33	33	33	33	33	33	33	33	33	33
>ENSSSCP00000021430	3	1.31198	0.0243603	DNAJC3	none	DnaJ (Hsp40) homolog, subfamily C, member 3 [Source:HGNC Symbol;Acc:9439]|11|ENSSSCG00000026082|ENSSSCT00000026790	56294.8	46900.3	61678.8	64397.7	52202.3	73857.5	77343.6	70962.2	84533.5	71709.5	66998	71598.4	15.5173	15.9125	15.9747	15.6718	16.239	16.1148	16.3672	16.1299	16.0318	16.1276	1	3	1	1	1	1	4	2	5	6	7	1	3	3	3	3	3	3	3	3	3
>ENSSSCP00000023473	9	1.31199	0.0444443	BDH2	none	Uncharacterized protein [Source:UniProtKB/TrEMBL;Acc:I3LHC8]|8|ENSSSCG00000022282|ENSSSCT00000024244	411266	516922	359525	349488	419130	539579	562945	598787	480089	538810	494404	562439	18.9796	18.4557	18.4149	18.677	19.1026	19.1917	18.8729	19.0394	18.9153	19.1013	10	10	8	9	8	8	11	9	11	11	11	11	9	9	9	9	9	9	9	9	9
>ENSSSCP00000024925	2	1.31739	0.0146021	TRIM25	none	Uncharacterized protein [Source:UniProtKB/TrEMBL;Acc:I3LLF7]|12|ENSSSCG00000029475|ENSSSCT00000028418	34210.1	30477.7	38508.6	31844.9	36009.4	45068.1	40731.7	35167.9	48832.1	57411.7	44489.3	43775.8	14.8955	15.2329	14.9588	15.1361	15.3139	15.102	15.5755	15.8091	15.4412	15.4178	1	2	0	1	0	1	1	2	2	2	2	2	2	2	2	2	2	2	2	2	2
>ENSSSCP00000023952	6	1.31807	0.00147074	ASPH	none	Uncharacterized protein [Source:UniProtKB/TrEMBL;Acc:I3LIP6]|4|ENSSSCG00000025087|ENSSSCT00000028806	185316	200480	176526	170235	194024	244261	252690	257883	239402	224151	234459	256978	17.6131	17.4295	17.3772	17.5659	17.947	17.9764	17.8691	17.7741	17.839	17.9713	3	3	2	4	1	1	3	5	5	4	5	6	6	6	6	6	6	6	6	6	6
>ENSSSCP00000027339	3	1.31962	0.00547014	PSMG1	none	proteasome (prosome, macropain) assembly chaperone 1 [Source:HGNC Symbol;Acc:3043]|13|ENSSSCG00000030314|ENSSSCT00000023379	15716.7	16788.5	16563.9	13377.2	16137.1	20740.1	23596.6	18860.2	20189.7	18126.7	21434.3	22232.9	14.0352	14.0158	13.7075	13.9781	14.5263	14.2031	14.3013	14.1458	14.3876	14.4404	2	2	1	1	2	1	2	2	4	3	3	3	3	3	3	3	3	3	3	3	3
>ENSSSCP00000018439	20	1.32436	0.00897658	STAT3	none	Sus scrofa signal transducer and activator of transcription 3 (acute-phase response factor) (STAT3), mRNA. [Source:RefSeq mRNA;Acc:NM_001044580]|12|ENSSSCG00000017403|ENSSSCT00000018944	271566	243580	307021	244088	291574	359651	357587	308884	414395	384092	351607	341342	17.894	18.228	17.897	18.1535	18.4479	18.2367	18.6606	18.5511	18.4236	18.3809	11	15	11	12	4	7	16	17	19	22	19	16	20	20	20	20	20	20	20	20	20
>ENSSSCP00000007058	5	1.32447	0.00333923	SNX27	none	sorting nexin family member 27 [Source:HGNC Symbol;Acc:20073]|4|ENSSSCG00000006619|ENSSSCT00000007253	61712	60881.3	62497.8	59694.8	63774.3	81735.7	72210.1	71292.8	94113.2	94145.6	85918	72734.7	15.8937	15.9315	15.8653	15.9607	16.1399	16.1215	16.5221	16.5226	16.3907	16.1504	2	2	1	4	1	2	4	3	5	4	4	3	5	5	5	5	5	5	5	5	5
>ENSSSCP00000011447	4	1.32799	0.0071387	FAM175B	none	family with sequence similarity 175, member B [Source:HGNC Symbol;Acc:28975]|14|ENSSSCG00000010737|ENSSSCT00000011749	43731.8	50564.3	43938.5	38685.9	41738.6	58075.5	66156.7	58051	47425.5	54917.2	57197	64705.7	15.6258	15.4232	15.2395	15.3491	16.0136	15.825	15.5334	15.745	15.8037	15.9816	2	3	1	3	2	1	3	2	2	4	4	6	4	4	4	4	4	4	4	4	4
>ENSSSCP00000027560	2	1.32823	0.0422647	EML6	none	Uncharacterized protein [Source:UniProtKB/TrEMBL;Acc:I3LTW1]|GL896302.1|ENSSSCG00000025887|ENSSSCT00000026242	19943.8	18199	24100.4	16154.6	21321.3	26489.9	21409	21185.2	28919	32044.9	26407.9	28973.3	14.1516	14.5568	13.9797	14.38	14.3859	14.3708	14.8197	14.9678	14.6887	14.8224	1	2	1	2	0	0	1	2	2	2	2	1	2	2	2	2	2	2	2	2	2
>ENSSSCP00000020008	18	1.32992	0.00829453	PLCD1	none	phospholipase C, delta 1 [Source:HGNC Symbol;Acc:9060]|13|ENSSSCG00000027550|ENSSSCT00000024067	749341	713983	715999	829416	737966	996561	1.36519e+06	859872	960862	908777	963576	921093	19.4455	19.4496	19.6617	19.4932	20.3807	19.7138	19.874	19.7936	19.878	19.813	14	14	11	14	10	10	16	16	19	20	18	16	18	18	18	18	18	18	18	18	18
>ENSSSCP00000011552	3	1.33389	0.00245837	BROX	none	BRO1 domain and CAAX motif containing [Source:HGNC Symbol;Acc:26512]|10|ENSSSCG00000010836|ENSSSCT00000011855	19257.3	20882.2	18485.5	19688.1	17973.4	25687.2	27660.9	20428.6	27553.2	29445.2	23545.9	25489.2	14.35	14.1741	14.265	14.1336	14.7556	14.3183	14.7499	14.8457	14.5232	14.6376	0	0	0	0	0	0	1	0	2	3	4	4	3	3	3	3	3	3	3	3	3
>ENSSSCP00000023926	4	1.33394	0.0438244	ATP5L	none	Sus scrofa ATP synthase, H+ transporting, mitochondrial Fo complex, subunit G (ATP5L), nuclear gene encoding mitochondrial protein, mRNA. [Source:RefSeq mRNA;Acc:NM_001244137]|9|ENSSSCG00000023777|ENSSSCT00000032072	461059	576317	394453	400310	473157	615026	737890	753791	492029	501665	599576	605202	19.1365	18.5895	18.6108	18.852	19.493	19.5238	18.9084	18.9364	19.1936	19.2071	4	4	4	4	4	4	4	4	4	4	4	4	4	4	4	4	4	4	4	4	4
>ENSSSCP00000002007	7	1.33709	0.0105983	MFGE8	ECM Glycoproteins	Sus scrofa milk fat globule-EGF factor 8 protein (MFGE8), mRNA. [Source:RefSeq mRNA;Acc:NM_001122984]|7|ENSSSCG00000001834|ENSSSCT00000002056	110585	122716	94154.7	121516	103954	147862	150624	184357	136978	141918	131558	141736	16.905	16.5227	16.8908	16.6656	17.2006	17.4921	17.0636	17.1147	17.0053	17.1128	2	0	1	4	8	0	2	5	3	2	4	6	7	7	7	7	7	7	7	7	7
>ENSSSCP00000016029	38	1.33757	2.76677e-06	HYOU1	none	hypoxia up-regulated 1 [Source:HGNC Symbol;Acc:16931]|9|ENSSSCG00000015106|ENSSSCT00000016472	4.38874e+06	4.47771e+06	4475825	4269042	4.33237e+06	5.87023e+06	6.14733e+06	5.87396e+06	6.22796e+06	5.70242e+06	5828180	5.44151e+06	22.0943	22.0937	22.0255	22.0467	22.5515	22.4859	22.5703	22.4431	22.4746	22.3756	33	36	35	33	32	31	35	37	37	39	39	37	38	38	38	38	38	38	38	38	38
>ENSSSCP00000001135	4	1.33888	0.00549674	GMPR	none	guanosine monophosphate reductase [Source:HGNC Symbol;Acc:4376]|7|ENSSSCG00000001064|ENSSSCT00000001159	24307.7	23484	25187.8	26325.2	22233.6	32545.2	30266.1	26785.5	41638.2	35238.7	32124.4	29218	14.5194	14.6204	14.6842	14.4405	14.8854	14.7092	15.3456	15.1049	14.9714	14.8346	0	2	2	0	1	1	1	2	4	4	4	4	4	4	4	4	4	4	4	4	4
>ENSSSCP00000020261	6	1.34039	4.71909e-05	SIRT2	none	sirtuin 2 [Source:HGNC Symbol;Acc:10886]|6|ENSSSCG00000026794|ENSSSCT00000022319	182111	185088	179268	171880	192211	244100	259100	226133	240629	269003	240833	228901	17.4978	17.4518	17.391	17.5523	17.9832	17.7868	17.8765	18.0373	17.8777	17.8044	3	4	4	4	3	3	4	4	5	7	5	5	6	6	6	6	6	6	6	6	6
>ENSSSCP00000011800	2	1.34151	0.000213294	ACBD5	none	Uncharacterized protein [Source:UniProtKB/TrEMBL;Acc:F1RVK3]|10|ENSSSCG00000011064|ENSSSCT00000012108	15067.3	14968.6	15232.5	14692.5	15375.7	20213	22674.3	20254.9	20857.1	20655.5	17703.5	19133	13.8697	13.8949	13.8428	13.9084	14.4688	14.306	14.3483	14.3342	14.1117	14.2238	1	1	1	1	1	0	2	2	3	1	1	3	2	2	2	2	2	2	2	2	2
>ENSSSCP00000024793	5	1.34217	0.0250362	VPS4A	none	Sus scrofa vacuolar protein sorting 4 homolog A (S. cerevisiae) (VPS4A), mRNA. [Source:RefSeq mRNA;Acc:NM_001243418]|6|ENSSSCG00000025151|ENSSSCT00000026219	76649	73433.4	75140.6	80312.2	77709.9	102876	154782	92063.8	88389.4	89686.5	93424.9	98908.7	16.1641	16.1973	16.2933	16.2458	17.2399	16.4903	16.4316	16.4526	16.5115	16.5938	1	3	2	1	2	1	2	4	4	5	4	4	5	5	5	5	5	5	5	5	5
>ENSSSCP00000022058	18	1.34465	0.000406422	IDH1	none	isocitrate dehydrogenase 1 (NADP+), soluble [Source:HGNC Symbol;Acc:5382]|15|ENSSSCG00000023264|ENSSSCT00000026412	1.4191e+06	1.56735e+06	1.36543e+06	1.34475e+06	1398863	1908194	1.93544e+06	2.07817e+06	1.85864e+06	1766023	1.78241e+06	2.02849e+06	20.5799	20.3809	20.3589	20.4158	20.8842	20.9869	20.8258	20.7521	20.7654	20.952	16	16	16	17	14	14	17	18	18	18	18	18	18	18	18	18	18	18	18	18	18
>ENSSSCP00000014125	6	1.34721	0.00778284	COMMD9	none	COMM domain containing 9 [Source:HGNC Symbol;Acc:25014]|2|ENSSSCG00000013293|ENSSSCT00000014518	34819.2	31093.4	32822.9	34589.9	40770.8	46908.9	44653.1	43920.7	52009	49336.5	44305.3	47228.5	14.9243	15.0024	15.0781	15.3152	15.4465	15.4226	15.6665	15.5904	15.4352	15.5274	3	3	2	1	1	1	3	3	6	4	6	3	6	6	6	6	6	6	6	6	6
>ENSSSCP00000007063	29	1.3527	0.0010375	SELENBP1	none	selenium binding protein 1 [Source:HGNC Symbol;Acc:10719]|4|ENSSSCG00000006624|ENSSSCT00000007258	1888223	1.68629e+06	1.94017e+06	1996530	1.9299e+06	2.5542e+06	2312839	2274271	2866435	2.94409e+06	2.57673e+06	2.35084e+06	20.6854	20.8878	20.9291	20.8801	21.1412	21.117	21.4508	21.4894	21.2971	21.1647	21	27	25	21	18	18	23	27	27	30	28	28	29	29	29	29	29	29	29	29	29
>ENSSSCP00000002178	9	1.35641	0.0085137	RABGGTA	none	Sus scrofa Rab geranylgeranyltransferase, alpha subunit (RABGGTA), mRNA. [Source:RefSeq mRNA;Acc:NM_001098593]|7|ENSSSCG00000001992|ENSSSCT00000002230	156124	184709	155046	135925	148816	211768	228012	237047	187618	197007	185712	235212	17.4949	17.2423	17.0525	17.1832	17.7988	17.8548	17.5174	17.5879	17.5027	17.8436	8	6	6	6	2	3	5	7	8	8	9	7	9	9	9	9	9	9	9	9	9
>ENSSSCP00000019809	7	1.3578	3.8829e-05	RCVRN	none	recoverin [Source:HGNC Symbol;Acc:9937]|12|ENSSSCG00000028770|ENSSSCT00000023911	224503	220607	213490	225679	238234	304830	297861	311781	282621	285115	344288	307315	17.7511	17.7038	17.7839	17.862	18.1843	18.2502	18.1085	18.1212	18.3933	18.2294	7	6	5	7	5	5	7	6	7	7	8	9	7	7	7	7	7	7	7	7	7
>ENSSSCP00000016027	5	1.35895	0.0236164	TRAPPC4	none	trafficking protein particle complex 4 [Source:HGNC Symbol;Acc:19943]|9|ENSSSCG00000015104|ENSSSCT00000016470	43689.2	48259.8	50682.2	40034.8	35780.1	59371.6	53166.8	46931.7	67389.4	72734.7	56593	59413.7	15.5585	15.6292	15.289	15.1269	15.6982	15.5183	16.0402	16.1504	15.7883	15.8585	3	4	2	1	1	1	4	2	4	6	4	3	5	5	5	5	5	5	5	5	5
>ENSSSCP00000007163	14	1.36262	0.0440864	PHGDH	none	Sus scrofa phosphoglycerate dehydrogenase (PHGDH), mRNA. [Source:RefSeq mRNA;Acc:NM_001123162]|4|ENSSSCG00000006717|ENSSSCT00000007358	3.88148e+06	5.05956e+06	3337763	3.23604e+06	3.89255e+06	5.28898e+06	5.45062e+06	6046046	4.90111e+06	4824195	4947533	5.56439e+06	22.2706	21.6705	21.6258	21.8923	22.378	22.5276	22.2247	22.2019	22.2383	22.4078	20	20	20	20	21	18	21	22	21	22	22	22	14	14	14	14	14	14	14	14	14
>ENSSSCP00000000035	2	1.36942	0.0240551	TSPO	none	translocator protein (18kDa) [Source:HGNC Symbol;Acc:1158]|5|ENSSSCG00000000033|ENSSSCT00000000035	19113	16651.5	20331.7	16338	23130.7	26173.7	21764.2	30763.4	23895	21651.9	27914.9	31052.8	14.0234	14.3114	13.9959	14.4975	14.4097	14.9089	14.5444	14.4022	14.7687	14.9224	1	2	1	1	1	0	2	1	2	2	2	1	2	2	2	2	2	2	2	2	2
>ENSSSCP00000001101	3	1.37182	0.00166227	EEF1E1	none	Sus scrofa eukaryotic translation elongation factor 1 epsilon 1 (EEF1E1), mRNA. [Source:RefSeq mRNA;Acc:NM_001243545]|7|ENSSSCG00000001030|ENSSSCT00000001123	48370.1	53111	46329.8	43843.8	50195.9	66354.9	75752.4	74716.7	57602.5	58656.5	60145	71256.5	15.6967	15.4997	15.4201	15.6153	16.209	16.1891	15.8138	15.84	15.8762	16.1207	2	2	1	2	3	1	4	3	3	4	3	2	3	3	3	3	3	3	3	3	3
>ENSSSCP00000014873	2	1.3724	0.0267476	IBA57	none	IBA57, iron-sulfur cluster assembly homolog (S. cerevisiae) [Source:HGNC Symbol;Acc:27302]|2|ENSSSCG00000013988|ENSSSCT00000015279	10596.6	8065.16	11641.1	11191.8	11488.3	14542.8	14809.4	12355.8	14300.5	15909.2	14919.8	14962	12.9775	13.5069	13.4502	13.4879	13.8542	13.5929	13.8038	13.9576	13.8649	13.869	1	1	1	0	0	0	2	2	2	2	1	1	2	2	2	2	2	2	2	2	2
>ENSSSCP00000026137	3	1.3766	0.013867	NDUFB4	none	NADH dehydrogenase (ubiquinone) 1 beta subcomplex, 4, 15kDa [Source:HGNC Symbol;Acc:7699]|JH118974.1|ENSSSCG00000026807|ENSSSCT00000029549	144563	174263	133044	127965	142979	199005	252918	228641	165105	163908	194090	189366	17.4109	17.0215	16.9654	17.1254	17.9483	17.8027	17.333	17.3225	17.5664	17.5308	3	3	3	3	3	3	3	3	3	3	3	3	3	3	3	3	3	3	3	3	3
>ENSSSCP00000005145	5	1.3785	0.0152043	IVD	none	isovaleryl-CoA dehydrogenase [Source:HGNC Symbol;Acc:6186]|1|ENSSSCG00000004774|ENSSSCT00000005273	166616	207364	153084	152862	153154	229681	232324	249527	205658	207487	233785	249303	17.6618	17.224	17.2219	17.2246	17.8258	17.9288	17.6499	17.6627	17.8348	17.9275	5	5	5	5	5	3	6	6	5	6	6	5	5	5	5	5	5	5	5	5	5
>ENSSSCP00000008587	2	1.37883	0.0159092	TSC2	none	tuberous sclerosis 2 [Source:HGNC Symbol;Acc:12363]|3|ENSSSCG00000008040|ENSSSCT00000008811	13530.7	14112.3	11595.9	15451.6	12962.9	18656.5	20466.4	21274.4	12319	19580.5	18708.4	19590.3	13.7847	13.5013	13.9155	13.6621	14.321	14.3768	13.5886	14.2571	14.1914	14.2579	2	1	1	1	0	0	1	2	1	2	2	2	2	2	2	2	2	2	2	2	2
>ENSSSCP00000027335	2	1.37897	0.0413508	PRKACB	none	Uncharacterized protein [Source:UniProtKB/TrEMBL;Acc:I3LT91]|6|ENSSSCG00000028494|ENSSSCT00000026158	14725	12128.3	18212.3	12140.1	16419.2	20305.3	20358.1	17014.4	16864.2	21271.7	22081	24242.5	13.5661	14.1526	13.5675	14.0031	14.3133	14.0545	14.0417	14.3766	14.4305	14.5653	0	1	2	0	0	0	2	2	2	2	3	2	2	2	2	2	2	2	2	2	2
>ENSSSCP00000005246	5	1.37944	0.0059023	CYB5A	none	Sus scrofa cytochrome b5 type A (microsomal) (CYB5A), mRNA. [Source:RefSeq mRNA;Acc:NM_001001770]|1|ENSSSCG00000004875|ENSSSCT00000005381	1.11977e+06	1.03784e+06	1.28681e+06	1.16593e+06	988525	1.54467e+06	1.57747e+06	1.56516e+06	1.35378e+06	1.50255e+06	1.66733e+06	1.6017e+06	19.9851	20.2954	20.1531	19.9149	20.5892	20.5779	20.3686	20.519	20.6691	20.6112	4	5	4	4	4	4	5	5	5	5	5	5	5	5	5	5	5	5	5	5	5
>ENSSSCP00000012204	3	1.38161	0.0223173	ITIH3	ECM Regulators	inter-alpha-trypsin inhibitor heavy chain 3 [Source:HGNC Symbol;Acc:6168]|13|ENSSSCG00000011451|ENSSSCT00000012532	37181.9	33485.5	39348.7	44862.2	31031.2	51371	50595.7	57673.4	48071.9	50437.2	48954.6	52493	15.0313	15.264	15.4532	14.9214	15.6267	15.8156	15.5529	15.6222	15.5792	15.6798	1	0	0	0	4	0	2	3	3	4	2	2	3	3	3	3	3	3	3	3	3
>ENSSSCP00000023624	2	1.38629	0.00418927	COQ9	none	coenzyme Q9 [Source:HGNC Symbol;Acc:25302]|6|ENSSSCG00000025284|ENSSSCT00000023399	15172	13040.7	17418.7	15162.8	15065.8	21032.8	23884.9	20541.6	17338.5	21533.5	21350.8	21547.2	13.6707	14.0883	13.8882	13.879	14.5438	14.3263	14.0817	14.3943	14.382	14.3952	2	2	2	2	2	0	2	3	1	2	2	2	2	2	2	2	2	2	2	2	2
>ENSSSCP00000004409	4	1.39148	0.0438409	SYNE1	none	Uncharacterized protein [Source:UniProtKB/TrEMBL;Acc:F1S7X0]|1|ENSSSCG00000004082|ENSSSCT00000004511	15881.5	13202.5	13913.7	17007.2	19402.6	22098.9	34054.2	17804.8	22213.3	19959	20055.3	18506.6	13.6885	13.7642	14.0539	14.244	15.0555	14.12	14.4391	14.2848	14.2917	14.1757	1	4	3	0	0	0	1	2	2	4	5	0	4	4	4	4	4	4	4	4	4
>ENSSSCP00000000162	4	1.39557	0.0195805	FBXO7	none	Sus scrofa F-box protein 7 (FBXO7), mRNA. [Source:RefSeq mRNA;Acc:NM_001171751]|5|ENSSSCG00000000156|ENSSSCT00000000164	42510.8	52374	41184	34309.7	42175.6	59326.8	71479.1	66171.2	57620	55296.3	54057.6	51336.3	15.6766	15.3298	15.0663	15.3641	16.1252	16.0139	15.8143	15.7549	15.7222	15.6477	4	3	3	2	0	2	3	3	3	3	4	3	4	4	4	4	4	4	4	4	4
>ENSSSCP00000007758	9	1.39714	0.0112097	ACSS2	none	acyl-CoA synthetase short-chain family member 2 [Source:HGNC Symbol;Acc:15814]|17|ENSSSCG00000007286|ENSSSCT00000007971	108948	129896	101702	95344.2	108848	152215	154082	150762	159961	154063	139484	154938	16.987	16.634	16.5409	16.732	17.2333	17.2019	17.2874	17.2332	17.0897	17.2413	3	6	2	3	1	0	6	4	7	10	8	8	9	9	9	9	9	9	9	9	9
>ENSSSCP00000008018	9	1.40417	8.61666e-05	NPEPL1	none	Sus scrofa aminopeptidase-like 1 (NPEPL1), mRNA. [Source:RefSeq mRNA;Acc:NM_001123148]|17|ENSSSCG00000007517|ENSSSCT00000008237	70696.1	70296.3	72107.2	75180.1	65200.6	99269.2	116004	93585.6	95811.3	102818	94370.1	93025.3	16.1012	16.1379	16.1981	15.9926	16.8238	16.514	16.5479	16.6497	16.526	16.5053	4	5	5	5	3	3	8	5	7	9	10	5	9	9	9	9	9	9	9	9	9
>ENSSSCP00000000282	6	1.40435	2.78649e-05	C12orf10	none	chromosome 12 open reading frame 10 [Source:HGNC Symbol;Acc:17590]|5|ENSSSCG00000000267|ENSSSCT00000000286	93613.9	90790.5	92263.2	97837.6	93564.4	131467	138557	147151	126626	127113	117616	131740	16.4703	16.4935	16.5781	16.5137	17.0801	17.1669	16.9502	16.9558	16.8437	17.0073	4	5	3	5	2	2	4	3	6	5	7	6	6	6	6	6	6	6	6	6	6
>ENSSSCP00000023589	4	1.40992	0.000174813	LYPLA2	none	lysophospholipase II [Source:HGNC Symbol;Acc:6738]|6|ENSSSCG00000023191|ENSSSCT00000024963	60210.3	59949.9	60834.9	56423.7	63632.7	84891.5	71747.6	81910.7	83257.1	96896.8	92512.7	83024.2	15.8715	15.8926	15.784	15.9575	16.1306	16.3218	16.3453	16.5642	16.4974	16.3412	1	3	4	2	1	1	4	2	3	4	3	3	4	4	4	4	4	4	4	4	4
>ENSSSCP00000018966	4	1.41325	0.0029997	ENO3	none	enolase 3 (beta, muscle) [Source:HGNC Symbol;Acc:3354]|12|ENSSSCG00000017904|ENSSSCT00000019484	2.77947e+07	25525300	31252896	26815104	27585590	3.9281e+07	29993366	48457208	38097528	39939704	35990608	43207732	24.6054	24.8975	24.6765	24.7174	24.8381	25.5302	25.1832	25.2513	25.1011	25.3648	10	11	10	11	10	10	10	11	11	11	11	11	4	4	4	4	4	4	4	4	4
>ENSSSCP00000016724	6	1.41397	0.0391882	CASP3	none	caspase 3, apoptosis-related cysteine peptidase [Source:HGNC Symbol;Acc:1504]|15|ENSSSCG00000015783|ENSSSCT00000017185	111811	149964	90203.5	98783.7	108294	158097	184103	175189	145749	137579	151634	154330	17.1943	16.4609	16.592	16.7246	17.4902	17.4186	17.1531	17.0699	17.2102	17.2357	5	5	4	4	4	4	5	5	4	6	6	6	6	6	6	6	6	6	6	6	6
>ENSSSCP00000008069	3	1.41548	0.00140729	PSMG3	none	proteasome (prosome, macropain) assembly chaperone 3 [Source:HGNC Symbol;Acc:22420]|3|ENSSSCG00000007556|ENSSSCT00000008288	19020.2	21090.5	19059.4	16518.7	19412.2	26922.7	23247.2	29308	27473.2	26382.6	29908	25217	14.3643	14.2182	14.0118	14.2447	14.5048	14.839	14.7457	14.6873	14.8682	14.6221	2	1	2	3	3	2	2	3	2	2	2	2	3	3	3	3	3	3	3	3	3
>ENSSSCP00000022970	2	1.41563	0.0189099	FDFT1	none	farnesyl-diphosphate farnesyltransferase 1 [Source:HGNC Symbol;Acc:3629]|14|ENSSSCG00000026044|ENSSSCT00000024166	13567.5	11729.9	15403.4	12956.1	14180.8	19206.6	19617.6	16846.6	12459.7	24142.5	20874.7	21298.5	13.5179	13.911	13.6613	13.7917	14.2599	14.0402	13.605	14.5593	14.3495	14.3785	2	0	0	0	0	0	0	0	0	3	1	0	2	2	2	2	2	2	2	2	2
>ENSSSCP00000013714	11	1.41747	0.000370382	GSTP1	none	Uncharacterized protein [Source:UniProtKB/TrEMBL;Acc:F1RVN0]|2|ENSSSCG00000012897|ENSSSCT00000014100	2.5002e+07	22608798	27008856	26256508	24133800	3.54395e+07	32000350	38499304	31966828	37323024	37561808	35285864	24.4304	24.6869	24.6462	24.5246	24.9316	25.1983	24.9301	25.1536	25.1628	25.0726	9	9	8	10	8	8	8	10	10	10	11	10	11	11	11	11	11	11	11	11	11
>ENSSSCP00000007798	2	1.41855	0.0190635	NDRG3	none	NDRG family member 3 [Source:HGNC Symbol;Acc:14462]|17|ENSSSCG00000007322|ENSSSCT00000008012	27857.3	23733.1	33339.1	29878.1	24478.8	39517	38407.7	42555.4	26472.1	39391.7	43067.3	47207.9	14.5346	15.0249	14.8668	14.5792	15.2291	15.3771	14.6922	15.2656	15.3943	15.5267	0	2	1	1	0	0	2	2	1	2	2	2	2	2	2	2	2	2	2	2	2
>ENSSSCP00000023719	5	1.42827	0.00133422	ABCD3	none	Sus scrofa ATP-binding cassette, sub-family D (ALD), member 3 (ABCD3), mRNA. [Source:RefSeq mRNA;Acc:NM_001244133]|4|ENSSSCG00000028620|ENSSSCT00000032329	33872.7	34729.4	31106.9	31886.5	37768	48379.4	50161.4	38113.3	55276.7	54639.9	48518	43566.9	15.0839	14.9249	14.9607	15.2049	15.6143	15.218	15.7544	15.7377	15.5662	15.4109	7	8	3	4	2	2	9	9	8	11	7	8	5	5	5	5	5	5	5	5	5
>ENSSSCP00000025363	2	1.42962	0.0414224	ABHD10	none	abhydrolase domain containing 10 [Source:HGNC Symbol;Acc:25656]|JH118611.1|ENSSSCG00000023561|ENSSSCT00000032283	13602	9960.54	12309	16580	15558.3	19445.6	23298.9	20161.5	20591.4	16618	18299.5	17704.1	13.282	13.5874	14.0172	13.9254	14.508	14.2993	14.3298	14.0205	14.1595	14.1118	1	0	1	0	1	0	2	1	1	3	2	1	2	2	2	2	2	2	2	2	2
>ENSSSCP00000008903	2	1.43188	0.0200256	ANTXR1	none	anthrax toxin receptor 1 [Source:HGNC Symbol;Acc:21014]|3|ENSSSCG00000008340|ENSSSCT00000009134	10319.2	9682.49	9918.43	8525.91	13150.1	14775.9	15009.8	10187.9	15864.5	16950.6	15452.9	15189.8	13.2412	13.2759	13.0576	13.6828	13.8736	13.3146	13.9535	14.049	13.9156	13.8908	1	1	1	1	0	0	2	1	2	2	1	3	2	2	2	2	2	2	2	2	2
>ENSSSCP00000015933	4	1.43502	0.0132187	KDELC2	none	KDEL (Lys-Asp-Glu-Leu) containing 2 [Source:HGNC Symbol;Acc:28496]|9|ENSSSCG00000015009|ENSSSCT00000016373	27447.4	23293.8	30220	26265	30010.7	39387.6	36228.3	58925.3	32193.8	37245.6	38403.2	33329.5	14.5077	14.8832	14.6809	14.8732	15.1448	15.8466	14.9745	15.1848	15.2289	15.0245	0	0	0	0	0	0	2	1	0	1	2	2	4	4	4	4	4	4	4	4	4
>ENSSSCP00000023022	2	1.43816	0.000132122	COPS7B	none	COP9 signalosome subunit 7B [Source:HGNC Symbol;Acc:16760]|15|ENSSSCG00000022392|ENSSSCT00000023412	3526.42	3185.48	3630.85	3745.76	3543.6	5071.55	5709.68	4608.7	5261.57	5145.93	4449.59	5253.84	11.6373	11.8261	11.871	11.791	12.4792	12.1701	12.3613	12.3292	12.1195	12.3592	1	2	1	1	1	0	1	1	2	2	2	2	2	2	2	2	2	2	2	2	2
>ENSSSCP00000003276	5	1.44399	0.000596314	PAFAH1B3	none	Uncharacterized protein; Uncharacterized protein [Source:UniProtKB/TrEMBL;Acc:F1RGI2]|6|ENSSSCG00000029070|ENSSSCT00000003359	206603	218956	183014	220156	204284	298332	309277	304949	351013	311995	254753	258006	17.7403	17.4816	17.7482	17.6402	18.2385	18.2182	18.4212	18.2512	17.9587	17.977	3	5	4	2	3	1	5	6	5	7	6	6	5	5	5	5	5	5	5	5	5
>ENSSSCP00000011571	16	1.44408	0.000980588	EPHX1	none	Sus scrofa epoxide hydrolase 1, microsomal (xenobiotic) (EPHX1), mRNA. [Source:RefSeq mRNA;Acc:NM_214355]|10|ENSSSCG00000010853|ENSSSCT00000011875	2.6605e+06	2.93539e+06	2.55851e+06	2.42684e+06	2.72125e+06	3.84196e+06	4.06485e+06	3.64453e+06	3.99419e+06	3.89845e+06	3742892	3.70686e+06	21.4851	21.2869	21.2106	21.3758	21.9548	21.7973	21.9295	21.8945	21.8357	21.8218	14	15	14	15	14	15	17	16	16	17	19	16	16	16	16	16	16	16	16	16	16
>ENSSSCP00000005680	12	1.44608	0.00313046	PSAT1	none	phosphoserine aminotransferase 1 [Source:HGNC Symbol;Acc:19129]|1|ENSSSCG00000005287|ENSSSCT00000005824	2.09251e+06	2.36084e+06	1.94837e+06	1868702	2.19212e+06	3.02593e+06	3238317	3.18402e+06	3.04419e+06	2891885	2.86562e+06	2.93156e+06	21.1709	20.8938	20.8336	21.0639	21.6268	21.6024	21.5376	21.4636	21.4504	21.4832	10	10	9	10	11	9	12	12	11	13	11	11	12	12	12	12	12	12	12	12	12
>ENSSSCP00000015711	5	1.44816	0.00725756	STIM1	none	stromal interaction molecule 1 [Source:RefSeq peptide;Acc:NP_001124446]|9|ENSSSCG00000014792|ENSSSCT00000016143	38348.5	31807.4	44612.9	35691.7	41282.1	55534.8	56888.3	44698.5	63301.5	64052.2	51018.7	53249.5	14.9571	15.4452	15.1233	15.3332	15.7958	15.4479	15.95	15.967	15.6387	15.7005	3	4	3	3	1	2	4	4	4	5	4	3	5	5	5	5	5	5	5	5	5
>ENSSSCP00000025216	3	1.44967	0.00625151	ARSD	none	arylsulfatase D [Source:HGNC Symbol;Acc:717]|GL896120.1|ENSSSCG00000020871|ENSSSCT00000027390	7501.44	6475.27	8475.74	7084.3	7970.44	10874.6	9962.84	9096.45	9123.25	13280.1	13951.3	9833.71	12.6607	13.0491	12.7904	12.9604	13.2823	13.1511	13.1553	13.697	13.7681	13.2635	2	2	1	2	0	0	3	2	2	6	5	3	3	3	3	3	3	3	3	3	3
>ENSSSCP00000016052	2	1.45065	0.00452199	ARHGEF12	none	Rho guanine nucleotide exchange factor (GEF) 12 [Source:HGNC Symbol;Acc:14193]|9|ENSSSCG00000015129|ENSSSCT00000016495	5763.83	4880.36	6795.66	5572.74	5806.55	8361.29	7967.31	7464.6	8094.73	10817.6	7803.17	8020.3	12.2528	12.7304	12.4442	12.5035	12.9599	12.8659	12.9828	13.4011	12.9298	12.9694	1	1	0	0	0	0	0	1	1	4	3	1	2	2	2	2	2	2	2	2	2
>ENSSSCP00000015129	2	1.45121	0.0443596	COMMD10	none	COMM domain containing 10 [Source:HGNC Symbol;Acc:30201]|2|ENSSSCG00000014223|ENSSSCT00000015541	8393.39	7026.29	6316.77	10669.8	9560.73	12180.6	14662.8	10362.7	13181.1	11648.4	13892.7	9336.04	12.7785	12.625	13.3812	13.2229	13.8399	13.3391	13.6862	13.5078	13.762	13.1886	1	1	0	0	0	0	0	0	1	3	1	1	2	2	2	2	2	2	2	2	2
>ENSSSCP00000024904	2	1.45159	0.0265661	THUMPD1	none	THUMP domain containing 1 [Source:HGNC Symbol;Acc:23807]|3|ENSSSCG00000024748|ENSSSCT00000024527	37583.7	40474.6	43313.9	30603.8	35942.4	54556	63206.7	52282.1	32463.2	52817.3	67118.2	59448.4	15.3047	15.4025	14.9014	15.1334	15.9478	15.674	14.9865	15.6887	16.0344	15.8593	2	2	2	2	2	2	3	2	2	2	3	2	2	2	2	2	2	2	2	2	2
>ENSSSCP00000001528	2	1.45583	0.0212586	C4A	none	Sus scrofa complement C4 (C4), mRNA. [Source:RefSeq mRNA;Acc:NM_001123089]|7|ENSSSCG00000001427|ENSSSCT00000001570	10249.9	11689.1	9528.63	11561.7	8220.11	14922.1	10962.7	21239.6	15118.6	11987.5	15587.3	14637	13.5129	13.2181	13.4971	13.0049	13.4203	14.3745	13.884	13.5492	13.9281	13.8373	1	1	0	0	6	0	0	1	0	2	2	3	2	2	2	2	2	2	2	2	2
>ENSSSCP00000021124	4	1.4607	9.69495e-05	ABHD14B	none	abhydrolase domain containing 14B [Source:HGNC Symbol;Acc:28235]|13|ENSSSCG00000026847|ENSSSCT00000027042	51690.3	50805.7	51953.1	52844.7	51157.5	75504.1	73586.7	82327.1	80650.6	76681.3	75911.5	63867.7	15.6327	15.6649	15.6895	15.6427	16.1672	16.3291	16.2994	16.2266	16.212	15.9628	3	3	3	2	1	2	4	3	4	4	4	3	4	4	4	4	4	4	4	4	4
>ENSSSCP00000017842	9	1.46235	0.00144594	SLC1A3	none	solute carrier family 1 (glial high affinity glutamate transporter), member 3 [Source:HGNC Symbol;Acc:10941]|16|ENSSSCG00000016841|ENSSSCT00000018338	960247	833119	1.06172e+06	951644	994509	1.40421e+06	1.46974e+06	1.14041e+06	1.54305e+06	1.62713e+06	1462447	1.18251e+06	19.6682	20.018	19.8601	19.9236	20.4871	20.1211	20.5574	20.6339	20.48	20.1734	8	10	10	8	6	8	9	9	10	10	10	10	9	9	9	9	9	9	9	9	9
>ENSSSCP00000006450	2	1.46941	0.000589281	NCOA7	none	Uncharacterized protein [Source:UniProtKB/TrEMBL;Acc:F1S1E9]|4|ENSSSCG00000006037|ENSSSCT00000006626	34846.7	31221.3	35123.5	38787	34255.1	51204.3	53002.2	46030.8	55280.9	53513.3	50271.6	49126.7	14.9302	15.1001	15.2433	15.064	15.6938	15.4903	15.7545	15.7076	15.6175	15.5842	5	15	9	9	0	2	13	16	14	19	17	15	2	2	2	2	2	2	2	2	2
>ENSSSCP00000011983	2	1.47372	0.0473376	UBP1	none	upstream binding protein 1 (LBP-1a) [Source:HGNC Symbol;Acc:12507]|13|ENSSSCG00000011235|ENSSSCT00000012302	95962.7	86160	91842	133790	72059.1	141422	176691	135747	136838	95468	139451	164338	16.3947	16.4869	17.0296	16.1369	17.4309	17.0506	17.0621	16.5427	17.0894	17.3263	1	1	2	1	1	1	2	1	1	2	2	1	2	2	2	2	2	2	2	2	2
>ENSSSCP00000010737	3	1.47771	0.000194824	GSTT1	none	glutathione S-transferase theta 1 [Source:HGNC Symbol;Acc:4641]|14|ENSSSCG00000010064|ENSSSCT00000011025	131011	142801	122965	121917	136360	193595	201121	206086	180046	193243	175885	205191	17.1236	16.9079	16.8955	17.0571	17.6177	17.6529	17.458	17.5601	17.4243	17.6466	3	3	3	3	3	2	3	4	3	4	3	3	3	3	3	3	3	3	3	3	3
>ENSSSCP00000009377	12	1.47998	0.00882838	LIMCH1	none	|8|ENSSSCG00000008799|ENSSSCT00000009626	199418	232554	177552	222136	165431	295135	300115	227883	315877	319623	311834	295478	17.8272	17.4379	17.7611	17.3359	18.1952	17.7979	18.269	18.286	18.2504	18.1727	6	9	5	6	0	5	8	6	13	15	14	9	12	12	12	12	12	12	12	12	12
>ENSSSCP00000010674	2	1.48472	0.0102145	SF3A1	none	Splicing factor 3A subunit 1; Uncharacterized protein [Source:UniProtKB/TrEMBL;Acc:F1RFD3]|14|ENSSSCG00000010002|ENSSSCT00000010959	24196.5	24116.2	27634.7	26201.1	18833.8	35925	36618.3	30414.2	34448.3	34114.1	40430.1	39524.8	14.5577	14.7542	14.6773	14.201	15.1603	14.8925	15.0721	15.0581	15.3031	15.2705	12	13	10	12	7	8	14	12	12	18	17	16	2	2	2	2	2	2	2	2	2
>ENSSSCP00000018643	7	1.50037	0.0234265	NME2	none	Sus scrofa non-metastatic cells 2, protein (NM23B) expressed in (NME2), mRNA. [Source:RefSeq mRNA;Acc:NM_001044610]|12|ENSSSCG00000017591|ENSSSCT00000019150	1.52449e+06	2.03487e+06	1.20694e+06	1.37412e+06	1.48204e+06	2.2873e+06	2.42515e+06	2.91215e+06	1746911	1.99245e+06	2.28099e+06	2.36613e+06	20.9565	20.2029	20.3901	20.4992	21.2096	21.4737	20.7364	20.9261	21.1212	21.1741	12	13	11	12	12	10	12	12	12	13	13	13	7	7	7	7	7	7	7	7	7
>ENSSSCP00000007277	2	1.50791	0.000237805	GSTM4	none	Uncharacterized protein [Source:UniProtKB/TrEMBL;Acc:F1S604]|4|ENSSSCG00000006822|ENSSSCT00000007473	6018.66	5971.21	6813.8	5659.67	5629.97	9075.61	9666.78	7934.7	9217.42	10601.4	8661.93	8371.44	12.5438	12.7342	12.4665	12.4589	13.2388	12.954	13.1701	13.372	13.0805	13.0313	0	2	2	2	0	0	2	1	2	3	1	2	2	2	2	2	2	2	2	2	2
>ENSSSCP00000008480	2	1.53507	0.00137983	HMOX2	none	heme oxygenase (decycling) 2 [Source:HGNC Symbol;Acc:5014]|3|ENSSSCG00000007942|ENSSSCT00000008704	10946.5	10293.9	12919.9	10913.5	9658.67	16803.6	16657.1	14171.1	16075.1	15966.6	17894.8	20056.9	13.3295	13.6573	13.4138	13.2376	14.0239	13.7907	13.9725	13.9628	14.1273	14.2918	1	2	2	2	0	1	3	3	3	3	4	2	2	2	2	2	2	2	2	2	2
>ENSSSCP00000019144	2	1.55205	0.00429882	MT-ND4	none	NADH-ubiquinone oxidoreductase chain 4 [Source:UniProtKB/Swiss-Prot;Acc:O79881]|MT|ENSSSCG00000018087|ENSSSCT00000019682	3737.22	3685.25	4104.74	4171.29	2987.59	5800.36	5800.02	4561.94	4829.79	6650.17	7341.47	5618.74	11.8475	12.0031	12.0263	11.5448	12.5018	12.1554	12.2377	12.6992	12.8419	12.456	1	1	1	1	0	0	2	1	2	2	2	1	2	2	2	2	2	2	2	2	2
>ENSSSCP00000018151	3	1.55672	0.000564176	FN3KRP	none	fructosamine 3 kinase related protein [Source:HGNC Symbol;Acc:25700]|12|ENSSSCG00000017134|ENSSSCT00000018652	29333.5	25632	30694.8	31509.5	29497.6	45664	35486.1	53454.8	49029.8	39521.1	50196.4	46295.7	14.6457	14.9057	14.9435	14.8483	15.115	15.706	15.5814	15.2703	15.6153	15.4986	0	1	0	1	1	0	2	3	2	3	4	3	3	3	3	3	3	3	3	3	3
>ENSSSCP00000013221	3	1.56273	0.0296607	UPRT	none	uracil phosphoribosyltransferase (FUR1) homolog (S. cerevisiae) [Source:HGNC Symbol;Acc:28334]|X|ENSSSCG00000012425|ENSSSCT00000013586	35018.3	50377.4	30339.2	28409.7	30946.8	54724.2	64778.6	59452.4	41092.6	42367.8	58992.8	61660.9	15.6205	14.8889	14.7941	14.9175	15.9832	15.8594	15.3266	15.3707	15.8483	15.9121	2	2	1	2	1	1	3	2	2	3	6	6	3	3	3	3	3	3	3	3	3
>ENSSSCP00000018272	4	1.56757	0.011726	CDC42EP4	none	CDC42 effector protein (Rho GTPase binding) 4 [Source:HGNC Symbol;Acc:17147]|12|ENSSSCG00000017245|ENSSSCT00000018774	48399.9	35632.4	55855.1	48382.9	53729.4	75870.1	69894.4	56050.4	75589.2	80593.7	98801	74292.2	15.1209	15.7694	15.5622	15.7134	16.0929	15.7744	16.2059	16.2984	16.5922	16.1809	1	3	4	3	1	1	4	3	4	4	5	4	4	4	4	4	4	4	4	4	4
>ENSSSCP00000002550	6	1.57369	4.8782e-05	PTGR2	none	Uncharacterized protein [Source:UniProtKB/TrEMBL;Acc:F1S3H7]|7|ENSSSCG00000002351|ENSSSCT00000002615	86329.4	89762.5	88689.5	85906.4	80959.1	135856	109118	144077	136514	138991	151359	135074	16.4538	16.4365	16.3905	16.3049	16.7355	17.1365	17.0587	17.0846	17.2076	17.0434	6	4	3	3	4	1	4	6	5	5	6	5	6	6	6	6	6	6	6	6	6
>ENSSSCP00000021149	4	1.58358	0.00132795	RAB8B	none	RAB8B, member RAS oncogene family [Source:HGNC Symbol;Acc:30273]|1|ENSSSCG00000026571|ENSSSCT00000026677	38838	33551.2	45038.9	40914.2	35847.7	61503	68350.3	46956.7	68045.9	68493	60875.8	56296.1	15.0341	15.4589	15.3203	15.1296	16.0607	15.519	16.0542	16.0637	15.8936	15.7807	2	3	2	2	1	2	4	2	3	4	3	4	4	4	4	4	4	4	4	4	4
>ENSSSCP00000016481	12	1.60256	0.00113179	GLUL	none	Sus scrofa glutamate-ammonia ligase (GLUL), mRNA. [Source:RefSeq mRNA;Acc:NM_213909]|9|ENSSSCG00000015545|ENSSSCT00000016935	818485	775171	846675	849039	803054	1.31167e+06	1.06045e+06	1.18919e+06	1736891	1.46039e+06	1.28622e+06	1.1369e+06	19.5642	19.6914	19.6955	19.6151	20.0162	20.1815	20.7281	20.4779	20.2947	20.1167	5	6	8	6	6	4	9	9	13	13	13	11	12	12	12	12	12	12	12	12	12
>ENSSSCP00000017516	2	1.60619	0.0289765	WDR91	none	WD repeat domain 91 [Source:HGNC Symbol;Acc:24997]|18|ENSSSCG00000016532|ENSSSCT00000018000	11981.2	12074.1	13554.7	7925.27	14370.7	19244	18724.5	17488.3	17807	22814.2	20905.4	17724.7	13.5596	13.7265	12.9522	13.8108	14.1926	14.0941	14.1202	14.4776	14.3516	14.1135	1	0	0	0	0	1	2	1	2	2	2	3	2	2	2	2	2	2	2	2	2
>ENSSSCP00000000984	10	1.60872	0.0223063	ATP2B1	none	ATPase, Ca++ transporting, plasma membrane 1 [Source:HGNC Symbol;Acc:814]|5|ENSSSCG00000027898|ENSSSCT00000001006	157405	156974	160860	159478	152306	253220	295535	165192	206754	413149	207876	230816	17.2602	17.2954	17.283	17.2166	18.173	17.3338	17.6576	18.6563	17.6654	17.8164	14	14	14	14	8	12	17	13	18	20	18	15	10	10	10	10	10	10	10	10	10
>ENSSSCP00000006838	9	1.61212	0.000782487	CADM3	none	cell adhesion molecule 3 [Source:HGNC Symbol;Acc:17601]|4|ENSSSCG00000006415|ENSSSCT00000007028	189958	197452	213960	165298	183120	306235	299740	288026	322498	333111	277197	316835	17.5911	17.707	17.3347	17.4824	18.1934	18.1358	18.2989	18.3456	18.0806	18.2734	6	8	5	5	2	3	8	10	9	10	10	10	9	9	9	9	9	9	9	9	9
>ENSSSCP00000000968	2	1.62362	0.00598288	NDUFA12	none	NADH dehydrogenase (ubiquinone) 1 alpha subcomplex, 12 [Source:HGNC Symbol;Acc:23987]|5|ENSSSCG00000000905|ENSSSCT00000000989	22236.5	17067.3	25174.3	24510.1	22194.5	36103.6	34660.7	31224.6	33111	40133	38786.7	38705.8	14.0589	14.6197	14.5811	14.4379	15.081	14.9304	15.015	15.2925	15.2433	15.2403	0	1	1	1	0	0	1	3	2	2	3	1	2	2	2	2	2	2	2	2	2
>ENSSSCP00000027236	2	1.6247	0.00124045	PTTG1IP	none	pituitary tumor-transforming 1 interacting protein [Source:HGNC Symbol;Acc:13524]|13|ENSSSCG00000021296|ENSSSCT00000027029	94719.6	107189	103667	81576	86446.2	153891	149512	183598	133499	144618	158660	153458	16.7098	16.6616	16.3159	16.3995	17.1899	17.4862	17.0265	17.1419	17.2756	17.2275	2	2	2	1	0	1	2	2	2	2	2	2	2	2	2	2	2	2	2	2	2
>ENSSSCP00000027238	2	1.63345	0.00737941	UPP1	none	uridine phosphorylase 1 [Source:HGNC Symbol;Acc:12576]|GL894763.1|ENSSSCG00000030388|ENSSSCT00000024494	23131.7	28528.7	19206.8	25543.8	19247.5	37784.6	39032	46672.9	42733.2	28562	33896.4	35810.9	14.8001	14.2293	14.6407	14.2324	15.2524	15.5103	15.3831	14.8018	15.0488	15.1281	1	1	1	1	1	0	2	4	3	3	3	2	2	2	2	2	2	2	2	2	2
>ENSSSCP00000004046	7	1.64333	3.46883e-07	MAPRE2	none	microtubule-associated protein, RP/EB family, member 2 [Source:HGNC Symbol;Acc:6891]|6|ENSSSCG00000003738|ENSSSCT00000004139	74996.6	74118.7	77856.3	75524.5	72486.7	123244	117863	121357	121425	137157	114572	127091	16.1776	16.2485	16.2047	16.1454	16.8468	16.8889	16.8897	17.0655	16.8059	16.9555	7	7	6	7	4	6	7	7	9	9	8	8	7	7	7	7	7	7	7	7	7
>ENSSSCP00000020530	2	1.64927	0.000458738	PNKD	none	Uncharacterized protein [Source:UniProtKB/TrEMBL;Acc:I3L919]|15|ENSSSCG00000029002|ENSSSCT00000031141	13671.9	14500.3	14408.6	12814.7	12963.8	22548.6	27763.3	21102	23992.5	25684.1	18389.3	18360.6	13.8238	13.8146	13.6455	13.6622	14.7609	14.3651	14.5503	14.6486	14.1666	14.1643	1	0	0	0	0	1	1	0	2	2	2	0	2	2	2	2	2	2	2	2	2
>ENSSSCP00000017921	5	1.66111	3.2049e-06	PLPP1	none	phosphatidic acid phosphatase type 2A [Source:HGNC Symbol;Acc:9228]|16|ENSSSCG00000016912|ENSSSCT00000018418	67677.4	69415.2	71882.4	64336.4	65075.7	112420	103446	111824	111102	112016	120494	115639	16.083	16.1334	15.9733	15.9898	16.6585	16.7709	16.7615	16.7733	16.8786	16.8193	1	1	1	1	1	1	3	6	5	6	6	5	5	5	5	5	5	5	5	5	5
>ENSSSCP00000018402	9	1.67158	0.0155835	MPP2	none	membrane protein, palmitoylated 2 (MAGUK p55 subfamily member 2) [Source:HGNC Symbol;Acc:7220]|12|ENSSSCG00000017367|ENSSSCT00000018906	85948.8	61791.5	94380.6	104729	82894.1	143670	124845	113743	120710	109131	208790	184803	15.9151	16.5262	16.6763	16.339	16.9298	16.7954	16.8812	16.7357	17.6717	17.4956	3	6	8	3	0	3	6	4	9	11	7	6	9	9	9	9	9	9	9	9	9
>ENSSSCP00000019018	2	1.68117	0.00447926	SAT2	none	spermidine/spermine N1-acetyltransferase family member 2 [Source:HGNC Symbol;Acc:23160]|12|ENSSSCG00000017952|ENSSSCT00000019536	11037.6	8719.36	11391	13495.3	10544.5	18556.1	12051.5	22153	17891.5	19313.5	21829.2	18097.8	13.09	13.4756	13.7202	13.3642	13.5569	14.4352	14.127	14.2373	14.414	14.1435	0	0	1	0	0	0	0	2	2	3	3	3	2	2	2	2	2	2	2	2	2
>ENSSSCP00000005337	8	1.72315	0.000575007	CORO2B	none	coronin, actin binding protein, 2B [Source:HGNC Symbol;Acc:2256]|1|ENSSSCG00000004962|ENSSSCT00000005474	107954	108429	123999	98767.8	100620	186021	198518	182408	187657	169717	186953	190871	16.7264	16.92	16.5918	16.6186	17.5989	17.4768	17.5177	17.3728	17.5123	17.5422	5	5	5	5	0	1	7	9	9	9	8	9	8	8	8	8	8	8	8	8	8
>ENSSSCP00000003467	2	1.7524	0.0184695	PNKP	none	polynucleotide kinase 3'-phosphatase [Source:HGNC Symbol;Acc:9154]|6|ENSSSCG00000003195|ENSSSCT00000003550	6845.47	4557.47	8424.41	6336.98	8063	11996	13943	6807.3	13042.6	12561.6	13728.4	11893.1	12.154	13.0404	12.6296	12.9771	13.7673	12.7329	13.6709	13.6167	13.7449	13.5378	0	1	0	0	0	0	2	2	2	3	2	1	2	2	2	2	2	2	2	2	2
>ENSSSCP00000006602	3	1.75722	0.000281404	LACTB2	none	lactamase, beta 2 [Source:HGNC Symbol;Acc:18512]|4|ENSSSCG00000006192|ENSSSCT00000006786	14443.2	15615.9	14489.7	12008.3	15659.2	25380	29351.9	28203.6	21967.4	23278.2	22548.5	26930.5	13.9307	13.8227	13.5517	13.9347	14.8412	14.7836	14.4231	14.5067	14.4607	14.717	0	0	0	0	0	1	2	3	0	2	1	3	3	3	3	3	3	3	3	3	3
>ENSSSCP00000013787	3	1.76044	2.8932e-06	C11orf68	none	chromosome 11 open reading frame 68 [Source:HGNC Symbol;Acc:28801]|2|ENSSSCG00000012966|ENSSSCT00000014173	24415	26541.9	23662.7	23405.1	24050.5	42981.3	38560.5	39213.6	40982.8	49325.7	45924.4	43880.6	14.696	14.5303	14.5145	14.5538	15.2348	15.2591	15.3227	15.5901	15.487	15.4213	1	2	1	2	0	1	2	2	2	4	3	3	3	3	3	3	3	3	3	3	3
>ENSSSCP00000026195	2	1.76395	0.00124998	PZP	ECM Regulators	Uncharacterized protein [Source:UniProtKB/TrEMBL;Acc:I3LQ17]|5|ENSSSCG00000024402|ENSSSCT00000032476	27819.5	34534.6	23998.4	26570.7	26174.3	49072.2	45994.2	52798.2	51124.1	58562.7	42899.2	43054.9	15.0758	14.5507	14.6976	14.6759	15.4892	15.6882	15.6417	15.8377	15.3887	15.3939	1	1	1	1	3	1	2	1	2	3	2	2	2	2	2	2	2	2	2	2	2
>ENSSSCP00000009608	2	1.8339	0.0197335	SFRP2	Secreted Factors	secreted frizzled-related protein 2 [Source:HGNC Symbol;Acc:10777]|8|ENSSSCG00000009004|ENSSSCT00000009861	18506.6	13183.3	15485.7	25141.4	20216.1	33939.4	34706.4	35165.4	30833.8	34881.4	32768.5	35280.9	13.6864	13.9187	14.6178	14.3032	15.0829	15.1019	14.9122	15.0902	15	15.1066	0	0	0	0	3	0	2	1	2	2	4	2	2	2	2	2	2	2	2	2	2
>ENSSSCP00000012870	2	1.86225	0.0269534	POFUT2	none	Uncharacterized protein [Source:UniProtKB/TrEMBL;Acc:F1SG35]|13|ENSSSCG00000012088|ENSSSCT00000013222	23700.9	24618.8	22513	26827.4	20844.4	44137.1	26978.8	76680.7	50949.9	23382.8	38769.1	48061.3	14.5875	14.4585	14.7114	14.3474	14.7195	16.2266	15.6368	14.5132	15.2426	15.5526	3	3	3	3	2	1	3	3	4	4	5	5	2	2	2	2	2	2	2	2	2
>ENSSSCP00000001049	5	1.89825	0.0302375	CRELD2	ECM Glycoproteins	cysteine-rich with EGF-like domains 2 [Source:HGNC Symbol;Acc:28150]|5|ENSSSCG00000000981|ENSSSCT00000001071	41633.9	24990.3	51709.1	56841.1	32995.2	79031.4	55623.2	90201.2	97802.1	87464.8	86413.7	56683.4	14.6091	15.6581	15.7946	15.01	15.7634	16.4609	16.5776	16.4164	16.399	15.7906	1	5	5	4	0	1	5	7	6	7	7	5	5	5	5	5	5	5	5	5	5
>ENSSSCP00000026382	3	1.89956	0.0231442	BCHE	none	Cholinesterase [Source:UniProtKB/Swiss-Prot;Acc:P32752]|13|ENSSSCG00000021503|ENSSSCT00000026297	32864.3	37335.1	38013.5	37333.4	18775.3	62427.6	69314.4	47205.1	78363.7	63851.6	58079.5	57751.3	15.1882	15.2142	15.1882	14.1965	16.0809	15.5267	16.2579	15.9624	15.8257	15.8176	2	1	1	2	1	1	5	2	4	5	3	3	3	3	3	3	3	3	3	3	3
>ENSSSCP00000002478	2	1.91263	0.0288669	FUT8	none	Sus scrofa fucosyltransferase 8 (alpha (1,6) fucosyltransferase) (FUT8), mRNA. [Source:RefSeq mRNA;Acc:NM_213899]|7|ENSSSCG00000002283|ENSSSCT00000002542	22826.6	25581.6	23826	18338.6	23560.2	43658.7	46770.6	88364.5	22610.4	33529	35232.7	35445.1	14.6428	14.5402	14.1626	14.5241	15.5133	16.4312	14.4647	15.0331	15.1046	15.1133	0	1	1	1	1	1	1	1	1	3	2	1	2	2	2	2	2	2	2	2	2
>ENSSSCP00000009827	2	2.05683	0.00520416	PKD2	none	polycystic kidney disease 2 (autosomal dominant) [Source:HGNC Symbol;Acc:9009]|8|ENSSSCG00000009217|ENSSSCT00000010093	2480.49	1913.15	3561.96	2235.22	2211.64	5101.95	3744.19	5350.72	5425.52	6196.6	5694.81	4199.87	10.9017	11.7985	11.1262	11.1109	11.8704	12.3855	12.4055	12.5973	12.4754	12.0361	0	2	0	0	0	0	2	0	0	2	2	1	2	2	2	2	2	2	2	2	2
>ENSSSCP00000014755	3	2.20559	6.62376e-09	TMEM221	none	Uncharacterized protein [Source:UniProtKB/TrEMBL;Acc:F1S957]|2|ENSSSCG00000013877|ENSSSCT00000015161	143275	138125	140283	150511	144180	316005	330876	291051	342216	322364	309828	299697	17.0756	17.098	17.1995	17.1375	18.3359	18.1509	18.3845	18.2983	18.2411	18.1931	2	2	2	2	2	2	3	3	2	3	3	2	3	3	3	3	3	3	3	3	3
>ENSSSCP00000005158	2	3.50967	4.56493e-07	THBS1	ECM Glycoproteins	Sus scrofa thrombospondin 1 (THBS1), mRNA. [Source:RefSeq mRNA;Acc:NM_001244536]|1|ENSSSCG00000004789|ENSSSCT00000005288	208859	224815	213460	176620	220540	733025	729998	771322	840959	622482	611584	821808	17.7784	17.7036	17.4303	17.7507	19.4775	19.557	19.6817	19.2477	19.2222	19.6484	28	32	33	32	36	18	1	3	2	3	4	3	2	2	2	2	2	2	2	2	2
[truncated: 5 more columns]
