# Supplementary material for: High glucose treatment promotes extracellular matrix proteome remodeling in Mller glial cells
Source: PeerJ. 2021 May 18;9:e11316. doi: 10.7717/peerj.11316 (PMC8139267; doi:10.7717/peerj.11316)
Supplement: Supplemental Information 5 — Pathway enrichment analysis of these 240 proteins pointed to an overrepresentation of proteins belonging to the context of extracellular matrix, which was demonstrated by the three most significantly overrepresented biological processes, namely extracellular structure organization, collagen fibril organization and extracellular matrix organization. [file peerj-09-11316-s005.xlsx]

## Sheet: Sheet1
GO-Term	GO-Term id	P-value	# Genes (observed)	# Genes (expected)	# Genes (total)	List of observed genes	Gene ids
extracellular structure organization	GO:0043062	5.31491e-13	27	4.86534	414	ITGA8, PLOD1, COL2A1, PRKACB, CYP1B1, ITGAL, COL12A1, ITGB1, VCAM1, FN1, COL3A1, THBS1, SPP1, APOE, ANTXR1, COL1A2, COL16A1, COL11A1, COL5A1, COL5A2, SFRP2, ICAM1, SPARC, CST3, ITGA5, PLOD2, PLOD3	8516, 5351, 1280, 5567, 1545, 3683, 1303, 3688, 7412, 2335, 1281, 7057, 6696, 348, 84168, 1278, 1307, 1301, 1289, 1290, 6423, 3383, 6678, 1471, 3678, 5352, 8985
collagen fibril organization	GO:0030199	8.94623e-13	12	0.622857	53	PLOD1, COL2A1, CYP1B1, COL12A1, COL3A1, COL1A2, COL11A1, COL5A1, COL5A2, SFRP2, PLOD2, PLOD3	5351, 1280, 1545, 1303, 1281, 1278, 1301, 1289, 1290, 6423, 5352, 8985
extracellular matrix organization	GO:0030198	9.64971e-13	25	4.21898	359	ITGA8, PLOD1, COL2A1, CYP1B1, ITGAL, COL12A1, ITGB1, VCAM1, FN1, COL3A1, THBS1, SPP1, ANTXR1, COL1A2, COL16A1, COL11A1, COL5A1, COL5A2, SFRP2, ICAM1, SPARC, CST3, ITGA5, PLOD2, PLOD3	8516, 5351, 1280, 1545, 3683, 1303, 3688, 7412, 2335, 1281, 7057, 6696, 84168, 1278, 1307, 1301, 1289, 1290, 6423, 3383, 6678, 1471, 3678, 5352, 8985
cellular component organization or biogenesis	GO:0071840	3.05057e-11	125	77.3283	6580	CASP3, TSC2, ITGA8, FAM129B, PLOD1, EBNA1BP2, SIRT2, CDH6, GLUL, CDC42EP4, PRNP, EDC3, CADM3, COL2A1, NME2, TGM2, PRKACB, CYP1B1, SF3A1, ITGAL, GNL3, KALRN, TNS1, GRWD1, IDH1, LUC7L, SON, COL12A1, GLS, AIF1, ITGB1, VCAM1, VPS4A, RRS1, TPM1, MRTO4, HLA-DRA, FHL3, FN1, SDC2, PNKP, SLC1A3, PHGDH, COL3A1, RABGGTA, THBS1, SPP1, RPL23, TSPO, FBXO7, APOE, LIMCH1, NDUFA12, IGF2R, SF1, ANO6, PDLIM4, MAP7D…	836, 7249, 8516, 64855, 5351, 10969, 22933, 1004, 2752, 23580, 5621, 80153, 57863, 1280, 4831, 7052, 5567, 1545, 10291, 3683, 26354, 8997, 7145, 83743, 3417, 55692, 6651, 1303, 2744, 199, 3688, 7412, 27183, 23212, 7168, 51154, 3122, 2275, 2335, 6383, 11284, 6507, 26227, 1281, 5875, 7057, 6696, 9349, 706, 25793, 348, 22998, 55967, 3482, 7536, 196527, 8572, 55700, 6430, 7458, 84168, 4355, 1278, 130…
cellular component organization	GO:0016043	4.42298e-09	117	75.2482	6403	CASP3, TSC2, ITGA8, FAM129B, PLOD1, SIRT2, CDH6, GLUL, CDC42EP4, PRNP, EDC3, CADM3, COL2A1, NME2, TGM2, PRKACB, CYP1B1, SF3A1, ITGAL, GNL3, KALRN, TNS1, GRWD1, IDH1, LUC7L, SON, COL12A1, GLS, AIF1, ITGB1, VCAM1, VPS4A, RRS1, TPM1, HLA-DRA, FHL3, FN1, SDC2, PNKP, SLC1A3, PHGDH, COL3A1, RABGGTA, THBS1, SPP1, RPL23, TSPO, FBXO7, APOE, LIMCH1, NDUFA12, IGF2R, SF1, ANO6, PDLIM4, MAP7D1, SRSF5, EIF4H, …	836, 7249, 8516, 64855, 5351, 22933, 1004, 2752, 23580, 5621, 80153, 57863, 1280, 4831, 7052, 5567, 1545, 10291, 3683, 26354, 8997, 7145, 83743, 3417, 55692, 6651, 1303, 2744, 199, 3688, 7412, 27183, 23212, 7168, 3122, 2275, 2335, 6383, 11284, 6507, 26227, 1281, 5875, 7057, 6696, 9349, 706, 25793, 348, 22998, 55967, 3482, 7536, 196527, 8572, 55700, 6430, 7458, 84168, 4355, 1278, 1307, 2207, 720, …
response to wounding	GO:0009611	2.42138e-08	27	7.87385	670	MYL9, CASP3, PABPC4, F3, PRKACB, AIF1, TPM1, FN1, SLC1A3, COL3A1, THBS1, SPP1, TSPO, ENO3, APOE, ANO6, COL1A2, FCER1G, DGKA, RIPOR1, COL5A1, ANXA8, PTK7, SPARC, CSRP1, MYOF, ITGA5	10398, 836, 8761, 2152, 5567, 199, 7168, 2335, 6507, 1281, 7057, 6696, 706, 2027, 348, 196527, 1278, 2207, 1606, 79567, 1289, 653145, 5754, 6678, 1465, 26509, 3678
response to endogenous stimulus	GO:0009719	6.26116e-08	45	19.3203	1644	CASP3, LTBP1, TSC2, ITGA8, SIRT2, PRNP, COL2A1, NME2, UPRT, PRKACB, IDH1, AIF1, ITGB1, COL3A1, THBS1, SPP1, RPL23, BCHE, TSPO, APOE, FHL2, SRSF5, POLR2E, COL1A2, COL16A1, FCER1G, IGFBP7, PLPP1, GPC1, COL5A2, SFRP2, HSP90AB1, NCL, SORT1, GSTP1, ICAM1, SPARC, FUT8, ARHGEF2, CTSH, ATP2B1, RAB8B, PKD2, PLOD3, ATP1A3	836, 4052, 7249, 8516, 22933, 5621, 1280, 4831, 139596, 5567, 3417, 199, 3688, 1281, 7057, 6696, 9349, 590, 706, 348, 2274, 6430, 5434, 1278, 1307, 2207, 3490, 8611, 2817, 1290, 6423, 3326, 4691, 6272, 2950, 3383, 6678, 2530, 9181, 1512, 490, 51762, 5311, 8985, 478
protein-containing complex subunit organization	GO:0043933	6.27327e-08	55	26.3363	2241	PLOD1, SIRT2, GLUL, CDC42EP4, PRNP, EDC3, COL2A1, NME2, TGM2, PRKACB, CYP1B1, SF3A1, GRWD1, LUC7L, COL12A1, GLS, AIF1, VPS4A, RRS1, HLA-DRA, FN1, COL3A1, RABGGTA, RPL23, APOE, NDUFA12, SF1, ANO6, SRSF5, EIF4H, MPP2, COL1A2, COL16A1, FCER1G, COL11A1, COL5A1, TRAPPC4, COL5A2, SFRP2, HSP90AB1, RPL38, ASPH, NCK2, FBLIM1, NIFK, ICAM1, HLA-DRB1, NDUFB4, RBM22, ARHGEF2, PLOD2, PKD2, ND4, SLC1A5, PLOD3	5351, 22933, 2752, 23580, 5621, 80153, 1280, 4831, 7052, 5567, 1545, 10291, 83743, 55692, 1303, 2744, 199, 27183, 23212, 3122, 2335, 1281, 5875, 9349, 348, 55967, 7536, 196527, 6430, 7458, 4355, 1278, 1307, 2207, 1301, 1289, 51399, 1290, 6423, 3326, 6169, 444, 8440, 54751, 84365, 3383, 3123, 4710, 55696, 9181, 5352, 5311, 4538, 6510, 8985
formation of primary germ layer	GO:0001704	1.73595e-07	11	1.41024	120	ITGA8, POFUT2, WLS, COL12A1, ITGB1, FN1, COL11A1, COL5A1, COL5A2, SFRP2, ITGA5	8516, 23275, 79971, 1303, 3688, 2335, 1301, 1289, 1290, 6423, 3678
response to stress	GO:0006950	2.39602e-07	79	46.3382	3943	MYL9, CASP3, PLOD1, SIRT2, HMOX2, GLUL, PABPC4, CDC42EP4, PRNP, F3, NME2, TGM2, PRKACB, CYP1B1, ITGAL, UPP1, IDH1, AIF1, ITGB1, NCOA7, VCAM1, TPM1, HLA-DRA, FN1, PNKP, SLC1A3, COL3A1, THBS1, SPP1, TSPO, FBXO7, ENO3, APOE, RBM3, CNOT4, NDUFA12, ANO6, PTTG1IP, PDLIM1, POLR2E, COL1A2, FCER1G, C4A, DGKA, RSL1D1, RIPOR1, TNKS1BP1, FLNB, IGFBP7, C1QB, COL5A1, SFRP2, HSP90AB1, ANXA8, PTK7, NCK2, RCN3, E…	10398, 836, 5351, 22933, 3163, 2752, 8761, 23580, 5621, 2152, 4831, 7052, 5567, 1545, 3683, 7378, 3417, 199, 3688, 135112, 7412, 7168, 3122, 2335, 11284, 6507, 1281, 7057, 6696, 706, 25793, 2027, 348, 5935, 4850, 55967, 196527, 754, 9124, 5434, 1278, 2207, 720, 1606, 26156, 79567, 85456, 2317, 3490, 713, 1289, 6423, 3326, 653145, 5754, 8440, 57333, 9521, 66005, 55466, 2950, 3383, 3123, 4710, 6678…
response to organic substance	GO:0010033	3.10685e-07	68	37.6535	3204	CASP3, LTBP1, TSC2, ITGA8, FAM129B, SIRT2, GLUL, CDC42EP4, PRNP, F3, COL2A1, NME2, UPRT, PRKACB, CYP1B1, IDH1, AIF1, ITGB1, VCAM1, HLA-DRA, FN1, COL3A1, THBS1, SPP1, RPL23, BCHE, TSPO, APOE, EPHX1, IGF2R, FHL2, SRSF5, POLR2E, COL1A2, COL16A1, FCER1G, FLNB, SDF4, IGFBP7, HNRNPA2B1, PLPP1, JAG1, ABCD3, GPC1, COL5A2, SFRP2, HSP90AB1, NCL, RANBP2, PTK7, NCK2, RCN3, SORT1, GSTP1, ICAM1, HLA-DRB1, SPAR…	836, 4052, 7249, 8516, 64855, 22933, 2752, 23580, 5621, 2152, 1280, 4831, 139596, 5567, 1545, 3417, 199, 3688, 7412, 3122, 2335, 1281, 7057, 6696, 9349, 590, 706, 348, 2052, 3482, 2274, 6430, 5434, 1278, 1307, 2207, 2317, 51150, 3490, 3181, 8611, 182, 5825, 2817, 1290, 6423, 3326, 4691, 5903, 5754, 8440, 57333, 6272, 2950, 3383, 3123, 6678, 2530, 9181, 1512, 490, 26509, 51762, 3678, 5311, 4538, 8…
response to oxidative stress	GO:0006979	3.13273e-07	20	5.2179	444	CASP3, SIRT2, HMOX2, PRNP, NME2, CYP1B1, IDH1, AIF1, NCOA7, TPM1, PNKP, FBXO7, APOE, NDUFA12, PDLIM1, GSTP1, NDUFB4, FUT8, DHRS2, PKD2	836, 22933, 3163, 5621, 4831, 1545, 3417, 199, 135112, 7168, 11284, 25793, 348, 55967, 9124, 2950, 4710, 2530, 10202, 5311
response to organonitrogen compound	GO:0010243	3.24866e-07	31	11.3054	962	CASP3, TSC2, SIRT2, PRNP, NME2, UPRT, PRKACB, AIF1, ITGB1, COL3A1, RPL23, BCHE, TSPO, APOE, SRSF5, COL1A2, COL16A1, FCER1G, JAG1, COL5A2, HSP90AB1, RANBP2, RCN3, SORT1, GSTP1, ICAM1, SPARC, ARHGEF2, RAB8B, PKD2, ATP1A3	836, 7249, 22933, 5621, 4831, 139596, 5567, 199, 3688, 1281, 9349, 590, 706, 348, 6430, 1278, 1307, 2207, 182, 1290, 3326, 5903, 57333, 6272, 2950, 3383, 6678, 9181, 51762, 5311, 478
anatomical structure formation involved in morphogenesis	GO:0048646	3.65499e-07	35	13.8556	1179	CASP3, TSC2, ITGA8, FAM129B, GLUL, F3, STIM1, COL2A1, TGM2, POFUT2, PRKACB, CYP1B1, WLS, COL12A1, ITGB1, TPM1, FN1, THBS1, FHL2, UBP1, COL11A1, JAG1, COL5A1, GPC1, TM4SF1, COL5A2, SFRP2, NCL, PTK7, PLXND1, CTHRC1, SPARC, CTSH, MYOF, ITGA5	836, 7249, 8516, 64855, 2752, 2152, 6786, 1280, 7052, 23275, 5567, 1545, 79971, 1303, 3688, 7168, 2335, 7057, 2274, 7342, 1301, 182, 1289, 2817, 4071, 1290, 6423, 4691, 5754, 23129, 115908, 6678, 1512, 26509, 3678
small molecule metabolic process	GO:0044281	4.2979e-07	49	23.504	2000	PLOD1, GLUL, ACSS2, NME2, UPRT, POFUT2, CYP1B1, UPP1, PNKD, IDH1, MAN2A2, GLS, BLMH, PNKP, SLC1A3, PHGDH, TSPO, ENO3, APOE, NDUFA12, FDFT1, EPHX1, FADS2, GSTM4, CYB5A, HDLBP, PTGR2, ITIH3, ABCD3, HIBCH, ABHD10, MINPP1, RCVRN, RANBP2, EEF1E1, ABHD14B, GSTP1, NDUFB4, FUT8, PLD4, LYPLA2, ACBD5, PSAT1, MYOF, PLOD2, COQ9, ND4, PLOD3, IVD	5351, 2752, 55902, 4831, 139596, 23275, 1545, 7378, 25953, 3417, 4122, 2744, 642, 11284, 6507, 26227, 706, 2027, 348, 55967, 2222, 2052, 9415, 2948, 1528, 3069, 145482, 3699, 5825, 26275, 55347, 9562, 5957, 5903, 9521, 84836, 2950, 4710, 2530, 122618, 11313, 91452, 29968, 26509, 5352, 57017, 4538, 8985, 3712
cellular response to chemical stimulus	GO:0070887	4.85843e-07	67	37.3009	3174	CASP3, LTBP1, TSC2, ITGA8, FAM129B, SIRT2, CDC42EP4, PRNP, F3, COL2A1, NME2, PRKACB, CYP1B1, AIF1, ITGB1, NCOA7, VCAM1, TPM1, HLA-DRA, FN1, PHGDH, COL3A1, THBS1, SPP1, RPL23, BCHE, TSPO, FBXO7, APOE, EPHX1, GSTM4, ANO6, FHL2, SRSF5, POLR2E, COL1A2, COL16A1, FCER1G, FLNB, IGFBP7, HNRNPA2B1, PLPP1, GPC1, COL5A2, SFRP2, HSP90AB1, NCL, PTK7, NCK2, SORT1, GSTT1, GSTP1, ICAM1, HLA-DRB1, SPARC, FUT8, RB…	836, 4052, 7249, 8516, 64855, 22933, 23580, 5621, 2152, 1280, 4831, 5567, 1545, 199, 3688, 135112, 7412, 7168, 3122, 2335, 26227, 1281, 7057, 6696, 9349, 590, 706, 25793, 348, 2052, 2948, 196527, 2274, 6430, 5434, 1278, 1307, 2207, 2317, 3490, 3181, 8611, 2817, 1290, 6423, 3326, 4691, 5754, 8440, 6272, 2952, 2950, 3383, 3123, 6678, 2530, 55696, 9181, 1512, 490, 26509, 51762, 3678, 10202, 5311, 89…
animal organ development	GO:0048513	6.83359e-07	71	40.8735	3478	MYL9, CASP3, LTBP1, TSC2, ITGA8, FAM129B, SIRT2, PABPC4, STIM1, COL2A1, NME2, UPRT, TGM2, POFUT2, CYP1B1, WLS, KALRN, IDH1, LUC7L, COL12A1, AIF1, ITGB1, VCAM1, RRS1, TPM1, FHL3, FN1, PHGDH, COL3A1, THBS1, SPP1, TSPO, FBXO7, CNOT4, IGF2R, SF1, ANO6, FHL2, SRSF5, COL1A2, FCER1G, COL11A1, FLNB, SDF4, C1QB, JAG1, COL5A1, MINPP1, GPC1, PRRC2C, COL5A2, GJA1, SFRP2, HSP90AB1, RPL38, PAFAH1B3, PTK7, RCN3…	10398, 836, 4052, 7249, 8516, 64855, 22933, 8761, 6786, 1280, 4831, 139596, 7052, 23275, 1545, 79971, 8997, 3417, 55692, 1303, 199, 3688, 7412, 23212, 7168, 2275, 2335, 26227, 1281, 7057, 6696, 706, 25793, 4850, 3482, 7536, 196527, 2274, 6430, 1278, 2207, 1301, 2317, 51150, 713, 182, 1289, 9562, 2817, 23215, 1290, 2697, 6423, 3326, 6169, 5050, 5754, 57333, 23129, 115908, 2950, 3383, 6678, 122618,…
wound healing	GO:0042060	7.3447e-07	22	6.54588	557	MYL9, CASP3, PABPC4, F3, PRKACB, TPM1, FN1, COL3A1, THBS1, ENO3, APOE, ANO6, COL1A2, FCER1G, DGKA, COL5A1, ANXA8, PTK7, SPARC, CSRP1, MYOF, ITGA5	10398, 836, 8761, 2152, 5567, 7168, 2335, 1281, 7057, 2027, 348, 196527, 1278, 2207, 1606, 1289, 653145, 5754, 6678, 1465, 26509, 3678
supramolecular fiber organization	GO:0097435	9.54248e-07	24	7.74458	659	PLOD1, CDC42EP4, COL2A1, CYP1B1, COL12A1, AIF1, ITGB1, TPM1, COL3A1, APOE, LIMCH1, COL1A2, COL11A1, COL5A1, COL5A2, SFRP2, HSP90AB1, NCK2, ICAM1, CST3, ARHGEF2, TPM2, PLOD2, PLOD3	5351, 23580, 1280, 1545, 1303, 199, 3688, 7168, 1281, 348, 22998, 1278, 1301, 1289, 1290, 6423, 3326, 8440, 3383, 1471, 9181, 7169, 5352, 8985
cellular component biogenesis	GO:0044085	1.07986e-06	68	38.9227	3312	EBNA1BP2, SIRT2, CDH6, GLUL, CDC42EP4, PRNP, EDC3, NME2, TGM2, PRKACB, SF3A1, TNS1, GRWD1, LUC7L, GLS, AIF1, ITGB1, VPS4A, RRS1, TPM1, MRTO4, HLA-DRA, FN1, RABGGTA, THBS1, APOE, LIMCH1, NDUFA12, SF1, ANO6, SRSF5, EIF4H, ANTXR1, MPP2, COL1A2, COL16A1, WBP11, FCER1G, RSL1D1, WDR3, TRAPPC4, RRP9, GPC1, MAPRE2, GJA1, NPM3, HSP90AB1, RPL38, NCK2, PLXND1, THUMPD1, FBLIM1, NIFK, DNAJA4, IBA57, ICAM1, HL…	10969, 22933, 1004, 2752, 23580, 5621, 80153, 4831, 7052, 5567, 10291, 7145, 83743, 55692, 2744, 199, 3688, 27183, 23212, 7168, 51154, 3122, 2335, 5875, 7057, 348, 22998, 55967, 7536, 196527, 6430, 7458, 84168, 4355, 1278, 1307, 51729, 2207, 26156, 10885, 51399, 9136, 2817, 10982, 2697, 10360, 3326, 6169, 8440, 23129, 55623, 54751, 84365, 55466, 200205, 3383, 3123, 4710, 55696, 9181, 51762, 2239,…
response to chemical	GO:0042221	1.23443e-06	87	55.0347	4683	CASP3, LTBP1, TSC2, ITGA8, FAM129B, SIRT2, GLUL, CDC42EP4, PRNP, F3, STIM1, COL2A1, NME2, UPRT, PRKACB, CYP1B1, IDH1, AIF1, ITGB1, NCOA7, VCAM1, TPM1, BLMH, HLA-DRA, FN1, SLC1A3, PHGDH, COL3A1, THBS1, SPP1, RPL23, BCHE, TSPO, FBXO7, ENO3, APOE, EPHX1, IGF2R, GSTM4, ANO6, FHL2, SRSF5, CYB5A, POLR2E, COL1A2, COL16A1, FCER1G, FLNB, SDF4, IGFBP7, HNRNPA2B1, PLPP1, JAG1, ABCD3, GPC1, COL5A2, SFRP2, HS…	836, 4052, 7249, 8516, 64855, 22933, 2752, 23580, 5621, 2152, 6786, 1280, 4831, 139596, 5567, 1545, 3417, 199, 3688, 135112, 7412, 7168, 642, 3122, 2335, 6507, 26227, 1281, 7057, 6696, 9349, 590, 706, 25793, 2027, 348, 2052, 3482, 2948, 196527, 2274, 6430, 1528, 5434, 1278, 1307, 2207, 2317, 51150, 3490, 3181, 8611, 182, 5825, 2817, 1290, 6423, 3326, 4691, 5903, 5754, 8440, 57333, 23129, 6272, 29…
developmental process	GO:0032502	1.301e-06	108	74.0025	6297	MYL9, CASP3, LTBP1, TSC2, ITGA8, FAM129B, PLOD1, SIRT2, CDH6, GLUL, PABPC4, CDC42EP4, PRNP, F3, STIM1, COL2A1, NME2, UPRT, TGM2, POFUT2, PRKACB, CYP1B1, WLS, GNL3, KALRN, IDH1, LUC7L, COL12A1, AIF1, ITGB1, VCAM1, VPS4A, RRS1, TPM1, FHL3, FN1, SDC2, SLC1A3, PHGDH, COL3A1, THBS1, SPP1, BCHE, TSPO, FBXO7, ENO3, APOE, CNOT4, IGF2R, SF1, ANO6, FHL2, SRSF5, EIF4H, ANTXR1, COL1A2, FCER1G, UBP1, RSL1D1, …	10398, 836, 4052, 7249, 8516, 64855, 5351, 22933, 1004, 2752, 8761, 23580, 5621, 2152, 6786, 1280, 4831, 139596, 7052, 23275, 5567, 1545, 79971, 26354, 8997, 3417, 55692, 1303, 199, 3688, 7412, 27183, 23212, 7168, 2275, 2335, 6383, 6507, 26227, 1281, 7057, 6696, 590, 706, 25793, 2027, 348, 4850, 3482, 7536, 196527, 2274, 6430, 7458, 84168, 1278, 2207, 7342, 26156, 1301, 2317, 51150, 3490, 713, 18…
alpha-amino acid biosynthetic process	GO:1901607	1.44551e-06	8	0.810889	69	PLOD1, GLUL, GLS, SLC1A3, PHGDH, PSAT1, PLOD2, PLOD3	5351, 2752, 2744, 6507, 26227, 29968, 5352, 8985
hydroxylysine metabolic process	GO:0046946	1.60106e-06	3	0.0352561	3	PLOD1, PLOD2, PLOD3	5351, 5352, 8985
hydroxylysine biosynthetic process	GO:0046947	1.60106e-06	3	0.0352561	3	PLOD1, PLOD2, PLOD3	5351, 5352, 8985
cellular response to endogenous stimulus	GO:0071495	2.02946e-06	37	16.2648	1384	CASP3, LTBP1, TSC2, ITGA8, SIRT2, PRNP, COL2A1, PRKACB, AIF1, ITGB1, COL3A1, THBS1, SPP1, RPL23, FHL2, SRSF5, POLR2E, COL1A2, COL16A1, IGFBP7, PLPP1, GPC1, COL5A2, SFRP2, HSP90AB1, NCL, SORT1, GSTP1, ICAM1, FUT8, ARHGEF2, CTSH, ATP2B1, RAB8B, PKD2, PLOD3, ATP1A3	836, 4052, 7249, 8516, 22933, 5621, 1280, 5567, 199, 3688, 1281, 7057, 6696, 9349, 2274, 6430, 5434, 1278, 1307, 3490, 8611, 2817, 1290, 6423, 3326, 4691, 6272, 2950, 3383, 2530, 9181, 1512, 490, 51762, 5311, 8985, 478
response to nitrogen compound	GO:1901698	2.12053e-06	31	12.3514	1051	CASP3, TSC2, SIRT2, PRNP, NME2, UPRT, PRKACB, AIF1, ITGB1, COL3A1, RPL23, BCHE, TSPO, APOE, SRSF5, COL1A2, COL16A1, FCER1G, JAG1, COL5A2, HSP90AB1, RANBP2, RCN3, SORT1, GSTP1, ICAM1, SPARC, ARHGEF2, RAB8B, PKD2, ATP1A3	836, 7249, 22933, 5621, 4831, 139596, 5567, 199, 3688, 1281, 9349, 590, 706, 348, 6430, 1278, 1307, 2207, 182, 1290, 3326, 5903, 57333, 6272, 2950, 3383, 6678, 9181, 51762, 5311, 478
anatomical structure development	GO:0048856	2.2658e-06	102	69.2312	5891	MYL9, CASP3, LTBP1, TSC2, ITGA8, FAM129B, PLOD1, SIRT2, CDH6, GLUL, PABPC4, CDC42EP4, F3, STIM1, COL2A1, NME2, UPRT, TGM2, POFUT2, PRKACB, CYP1B1, WLS, KALRN, IDH1, LUC7L, COL12A1, AIF1, ITGB1, VCAM1, VPS4A, RRS1, TPM1, FHL3, FN1, SDC2, SLC1A3, PHGDH, COL3A1, THBS1, SPP1, BCHE, TSPO, FBXO7, ENO3, APOE, CNOT4, IGF2R, SF1, ANO6, FHL2, SRSF5, ANTXR1, COL1A2, FCER1G, UBP1, COL11A1, FLNB, SDF4, IGFBP7…	10398, 836, 4052, 7249, 8516, 64855, 5351, 22933, 1004, 2752, 8761, 23580, 2152, 6786, 1280, 4831, 139596, 7052, 23275, 5567, 1545, 79971, 8997, 3417, 55692, 1303, 199, 3688, 7412, 27183, 23212, 7168, 2275, 2335, 6383, 6507, 26227, 1281, 7057, 6696, 590, 706, 25793, 2027, 348, 4850, 3482, 7536, 196527, 2274, 6430, 84168, 1278, 2207, 7342, 1301, 2317, 51150, 3490, 713, 182, 1289, 51399, 9562, 2817…
localization	GO:0051179	2.33985e-06	111	77.6339	6606	LTBP1, TSC2, ITGA8, FAM129B, HMOX2, GLUL, PRNP, F3, NUP210, STIM1, CADM3, NME2, UPRT, TGM2, POFUT2, CYP1B1, ITGAL, WLS, GNL3, KALRN, TNS1, PNKD, IDH1, GLS, AIF1, ITGB1, KPNA2, VCAM1, VPS4A, RRS1, TPM1, FN1, B3GAT3, SDC2, SLC1A3, COL3A1, THBS1, SELENBP1, SPP1, RPL23, TSPO, FBXO7, APOE, YBX1, LIMCH1, IGF2R, ANO6, SRSF5, PTTG1IP, ANTXR1, CYB5A, HDLBP, COL1A2, FCER1G, C4A, RSL1D1, RIPOR1, FLNB, SDF4,…	4052, 7249, 8516, 64855, 3163, 2752, 5621, 2152, 23225, 6786, 57863, 4831, 139596, 7052, 23275, 1545, 3683, 79971, 26354, 8997, 7145, 25953, 3417, 2744, 199, 3688, 3838, 7412, 27183, 23212, 7168, 2335, 26229, 6383, 6507, 1281, 7057, 8991, 6696, 9349, 706, 25793, 348, 4904, 22998, 3482, 196527, 6430, 754, 84168, 1528, 3069, 1278, 2207, 720, 26156, 79567, 2317, 51150, 3181, 8611, 334, 182, 3699, 58…
anatomical structure morphogenesis	GO:0009653	2.93738e-06	57	31.2134	2656	CASP3, TSC2, ITGA8, FAM129B, CDH6, GLUL, CDC42EP4, F3, STIM1, COL2A1, TGM2, POFUT2, PRKACB, CYP1B1, WLS, KALRN, COL12A1, ITGB1, TPM1, FN1, SDC2, SLC1A3, COL3A1, THBS1, SPP1, APOE, FHL2, ANTXR1, COL1A2, UBP1, COL11A1, FLNB, JAG1, COL5A1, GPC1, TM4SF1, COL5A2, SFRP2, HSP90AB1, RPL38, NCL, ASPH, PTK7, PLXND1, FBLIM1, CTHRC1, ICAM1, SPARC, CST3, ARHGEF2, CTSH, LYPLA2, MYOF, GPC4, ITGA5, PKD2, PLOD3	836, 7249, 8516, 64855, 1004, 2752, 23580, 2152, 6786, 1280, 7052, 23275, 5567, 1545, 79971, 8997, 1303, 3688, 7168, 2335, 6383, 6507, 1281, 7057, 6696, 348, 2274, 84168, 1278, 7342, 1301, 2317, 182, 1289, 2817, 4071, 1290, 6423, 3326, 6169, 4691, 444, 5754, 23129, 54751, 115908, 3383, 6678, 1471, 9181, 1512, 11313, 26509, 2239, 3678, 5311, 8985
integrin-mediated signaling pathway	GO:0007229	2.96934e-06	9	1.18695	101	ITGA8, NME2, ITGAL, ITGB1, COL3A1, COL16A1, FCER1G, FUT8, ITGA5	8516, 4831, 3683, 3688, 1281, 1307, 2207, 2530, 3678
biological adhesion	GO:0022610	3.13195e-06	37	16.5704	1410	MYL9, CASP3, ITGA8, CDH6, PRNP, CADM3, NME2, TGM2, CYP1B1, ITGAL, COL12A1, AIF1, ITGB1, VCAM1, TPM1, FN1, COL3A1, THBS1, SPP1, LIMCH1, ANTXR1, PDLIM1, COL16A1, IGFBP7, JAG1, COL5A1, SFRP2, HSP90AB1, PTK7, NCK2, PLXND1, FBLIM1, ICAM1, GLDN, CSRP1, GPC4, ITGA5	10398, 836, 8516, 1004, 5621, 57863, 4831, 7052, 1545, 3683, 1303, 199, 3688, 7412, 7168, 2335, 1281, 7057, 6696, 22998, 84168, 9124, 1307, 3490, 182, 1289, 6423, 3326, 5754, 8440, 23129, 54751, 3383, 342035, 1465, 2239, 3678
response to oxygen-containing compound	GO:1901700	3.39447e-06	40	18.7092	1592	CASP3, TSC2, SIRT2, GLUL, PRNP, NME2, UPRT, PRKACB, CYP1B1, AIF1, VCAM1, TPM1, COL3A1, THBS1, SPP1, RPL23, BCHE, TSPO, APOE, IGF2R, SRSF5, COL1A2, COL16A1, SDF4, IGFBP7, JAG1, COL5A2, HSP90AB1, PTK7, SORT1, GSTP1, ICAM1, SPARC, ARHGEF2, CTSH, ATP2B1, RAB8B, PKD2, ND4, ATP1A3	836, 7249, 22933, 2752, 5621, 4831, 139596, 5567, 1545, 199, 7412, 7168, 1281, 7057, 6696, 9349, 590, 706, 348, 3482, 6430, 1278, 1307, 51150, 3490, 182, 1290, 3326, 5754, 6272, 2950, 3383, 6678, 9181, 1512, 490, 51762, 5311, 4538, 478
tissue morphogenesis	GO:0048729	4.12055e-06	22	7.2745	619	TSC2, ITGA8, TGM2, POFUT2, PRKACB, WLS, COL12A1, ITGB1, TPM1, COL3A1, COL11A1, JAG1, COL5A1, SFRP2, PTK7, PLXND1, CTHRC1, CTSH, GPC4, ITGA5, PKD2, PLOD3	7249, 8516, 7052, 23275, 5567, 79971, 1303, 3688, 7168, 1281, 1301, 182, 1289, 6423, 5754, 23129, 115908, 1512, 2239, 3678, 5311, 8985
system development	GO:0048731	4.32439e-06	87	56.633	4819	MYL9, CASP3, LTBP1, TSC2, ITGA8, FAM129B, SIRT2, GLUL, PABPC4, F3, STIM1, COL2A1, NME2, UPRT, TGM2, POFUT2, PRKACB, CYP1B1, WLS, KALRN, IDH1, LUC7L, COL12A1, AIF1, ITGB1, VCAM1, RRS1, TPM1, FHL3, FN1, SDC2, SLC1A3, PHGDH, COL3A1, THBS1, SPP1, BCHE, TSPO, FBXO7, APOE, CNOT4, IGF2R, SF1, ANO6, FHL2, SRSF5, ANTXR1, COL1A2, FCER1G, UBP1, COL11A1, FLNB, SDF4, C1QB, JAG1, COL5A1, TRAPPC4, MINPP1, GPC1,…	10398, 836, 4052, 7249, 8516, 64855, 22933, 2752, 8761, 2152, 6786, 1280, 4831, 139596, 7052, 23275, 5567, 1545, 79971, 8997, 3417, 55692, 1303, 199, 3688, 7412, 23212, 7168, 2275, 2335, 6383, 6507, 26227, 1281, 7057, 6696, 590, 706, 25793, 348, 4850, 3482, 7536, 196527, 2274, 6430, 84168, 1278, 2207, 7342, 1301, 2317, 51150, 713, 182, 1289, 51399, 9562, 2817, 23215, 1290, 2697, 6423, 3326, 6169,…
multicellular organismal process	GO:0032501	4.44589e-06	122	89.1156	7583	MYL9, CASP3, LTBP1, TSC2, ITGA8, FAM129B, LMCD1, SIRT2, GLUL, PABPC4, PRNP, F3, STIM1, COL2A1, NME2, UPRT, TGM2, POFUT2, PRKACB, CYP1B1, WLS, GNL3, KALRN, PNKD, IDH1, LUC7L, COL12A1, GLS, PZP, AIF1, ITGB1, VCAM1, VPS4A, RRS1, TPM1, HLA-DRA, FHL3, FN1, SDC2, SLC1A3, PHGDH, COL3A1, RABGGTA, THBS1, SPP1, BCHE, TSPO, FBXO7, APOE, CNOT4, NDUFA12, IGF2R, SF1, ANO6, FHL2, SRSF5, ANTXR1, HDLBP, MPP2, COL…	10398, 836, 4052, 7249, 8516, 64855, 29995, 22933, 2752, 8761, 5621, 2152, 6786, 1280, 4831, 139596, 7052, 23275, 5567, 1545, 79971, 26354, 8997, 25953, 3417, 55692, 1303, 2744, 5858, 199, 3688, 7412, 27183, 23212, 7168, 3122, 2275, 2335, 6383, 6507, 26227, 1281, 5875, 7057, 6696, 590, 706, 25793, 348, 4850, 55967, 3482, 7536, 196527, 2274, 6430, 84168, 3069, 4355, 1278, 1307, 2207, 7342, 1606, 2…
circulatory system development	GO:0072359	6.11221e-06	32	13.6676	1163	CASP3, LTBP1, TSC2, FAM129B, GLUL, F3, STIM1, COL2A1, CYP1B1, ITGB1, VCAM1, TPM1, FN1, COL3A1, THBS1, APOE, FHL2, ANTXR1, COL1A2, UBP1, COL11A1, JAG1, COL5A1, GJA1, SFRP2, NCL, PTK7, PLXND1, SPARC, CTSH, ITGA5, PKD2	836, 4052, 7249, 64855, 2752, 2152, 6786, 1280, 1545, 3688, 7412, 7168, 2335, 1281, 7057, 348, 2274, 84168, 1278, 7342, 1301, 182, 1289, 2697, 6423, 4691, 5754, 23129, 6678, 1512, 3678, 5311
multicellular organism development	GO:0007275	6.23413e-06	94	63.3669	5392	MYL9, CASP3, LTBP1, TSC2, ITGA8, FAM129B, SIRT2, GLUL, PABPC4, F3, STIM1, COL2A1, NME2, UPRT, TGM2, POFUT2, PRKACB, CYP1B1, WLS, KALRN, IDH1, LUC7L, COL12A1, AIF1, ITGB1, VCAM1, VPS4A, RRS1, TPM1, FHL3, FN1, SDC2, SLC1A3, PHGDH, COL3A1, THBS1, SPP1, BCHE, TSPO, FBXO7, APOE, CNOT4, IGF2R, SF1, ANO6, FHL2, SRSF5, ANTXR1, COL1A2, FCER1G, UBP1, COL11A1, FLNB, SDF4, IGFBP7, C1QB, JAG1, COL5A1, TRAPPC4…	10398, 836, 4052, 7249, 8516, 64855, 22933, 2752, 8761, 2152, 6786, 1280, 4831, 139596, 7052, 23275, 5567, 1545, 79971, 8997, 3417, 55692, 1303, 199, 3688, 7412, 27183, 23212, 7168, 2275, 2335, 6383, 6507, 26227, 1281, 7057, 6696, 590, 706, 25793, 348, 4850, 3482, 7536, 196527, 2274, 6430, 84168, 1278, 2207, 7342, 1301, 2317, 51150, 3490, 713, 182, 1289, 51399, 9562, 2817, 4071, 23215, 1290, 2697…
cell adhesion	GO:0007155	7.06698e-06	36	16.4763	1402	MYL9, CASP3, ITGA8, CDH6, PRNP, CADM3, NME2, TGM2, CYP1B1, ITGAL, COL12A1, AIF1, ITGB1, VCAM1, TPM1, FN1, COL3A1, THBS1, SPP1, LIMCH1, ANTXR1, PDLIM1, COL16A1, IGFBP7, JAG1, COL5A1, SFRP2, PTK7, NCK2, PLXND1, FBLIM1, ICAM1, GLDN, CSRP1, GPC4, ITGA5	10398, 836, 8516, 1004, 5621, 57863, 4831, 7052, 1545, 3683, 1303, 199, 3688, 7412, 7168, 2335, 1281, 7057, 6696, 22998, 84168, 9124, 1307, 3490, 182, 1289, 6423, 5754, 8440, 23129, 54751, 3383, 342035, 1465, 2239, 3678
cellular amino acid biosynthetic process	GO:0008652	7.73114e-06	8	1.01067	86	PLOD1, GLUL, GLS, SLC1A3, PHGDH, PSAT1, PLOD2, PLOD3	5351, 2752, 2744, 6507, 26227, 29968, 5352, 8985
organonitrogen compound metabolic process	GO:1901564	8.93431e-06	113	81.5238	6937	CASP3, LTBP1, TSC2, LMCD1, PLOD1, SIRT2, HMOX2, GLUL, PABPC4, PRNP, F3, ACSS2, COL2A1, NME2, UPRT, TGM2, POFUT2, PRKACB, UPP1, GNL3, KALRN, PNKD, IDH1, MAN2A2, GLS, PZP, STT3A, AIF1, NCOA7, VCAM1, VPS4A, BLMH, FN1, B3GAT3, SDC2, PNKP, SLC1A3, PHGDH, COL3A1, RABGGTA, THBS1, SPP1, RPL23, BCHE, TSPO, FBXO7, ENO3, APOE, LIMCH1, RBM3, CNOT4, NDUFA12, FKBP10, GSTM4, PTTG1IP, EIF4H, ANTXR1, GFM1, FN3KRP…	836, 4052, 7249, 29995, 5351, 22933, 3163, 2752, 8761, 5621, 2152, 55902, 1280, 4831, 139596, 7052, 23275, 5567, 7378, 26354, 8997, 25953, 3417, 4122, 2744, 5858, 3703, 199, 135112, 7412, 27183, 642, 2335, 26229, 6383, 11284, 6507, 26227, 1281, 5875, 7057, 6696, 9349, 590, 706, 25793, 2027, 348, 22998, 5935, 4850, 55967, 60681, 2948, 754, 7458, 84168, 85476, 79672, 720, 831, 1301, 85456, 3490, 71…
cellular response to organic substance	GO:0071310	9.57442e-06	55	30.8491	2625	CASP3, LTBP1, TSC2, ITGA8, FAM129B, SIRT2, CDC42EP4, PRNP, F3, COL2A1, NME2, PRKACB, CYP1B1, AIF1, ITGB1, VCAM1, HLA-DRA, FN1, COL3A1, THBS1, SPP1, RPL23, TSPO, FHL2, SRSF5, POLR2E, COL1A2, COL16A1, FCER1G, FLNB, IGFBP7, HNRNPA2B1, PLPP1, GPC1, COL5A2, SFRP2, HSP90AB1, NCL, PTK7, NCK2, SORT1, GSTP1, ICAM1, HLA-DRB1, SPARC, FUT8, ARHGEF2, CTSH, ATP2B1, MYOF, RAB8B, ITGA5, PKD2, PLOD3, ATP1A3	836, 4052, 7249, 8516, 64855, 22933, 23580, 5621, 2152, 1280, 4831, 5567, 1545, 199, 3688, 7412, 3122, 2335, 1281, 7057, 6696, 9349, 706, 2274, 6430, 5434, 1278, 1307, 2207, 2317, 3490, 3181, 8611, 2817, 1290, 6423, 3326, 4691, 5754, 8440, 6272, 2950, 3383, 3123, 6678, 2530, 9181, 1512, 490, 26509, 51762, 3678, 5311, 8985, 478
response to acid chemical	GO:0001101	1.06163e-05	15	3.93693	335	CASP3, NME2, COL3A1, BCHE, IGF2R, COL1A2, COL16A1, IGFBP7, COL5A2, PTK7, GSTP1, ICAM1, SPARC, CTSH, PKD2	836, 4831, 1281, 590, 3482, 1278, 1307, 3490, 1290, 5754, 2950, 3383, 6678, 1512, 5311
gastrulation	GO:0007369	1.11506e-05	11	2.15062	183	ITGA8, POFUT2, WLS, COL12A1, ITGB1, FN1, COL11A1, COL5A1, COL5A2, SFRP2, ITGA5	8516, 23275, 79971, 1303, 3688, 2335, 1301, 1289, 1290, 6423, 3678
response to abiotic stimulus	GO:0009628	1.15544e-05	31	13.4326	1143	CASP3, PLOD1, SIRT2, HMOX2, AIF1, ITGB1, VCAM1, PNKP, SLC1A3, COL3A1, THBS1, TSPO, RBM3, PDLIM1, COL11A1, TNKS1BP1, SDF4, IGFBP7, RCVRN, SFRP2, HSP90AB1, DNAJA4, ICAM1, SPARC, TSC22D2, ARHGEF2, ATP2B1, MYOF, PLOD2, PKD2, ND4	836, 5351, 22933, 3163, 199, 3688, 7412, 11284, 6507, 1281, 7057, 706, 5935, 9124, 1301, 85456, 51150, 3490, 5957, 6423, 3326, 55466, 3383, 6678, 9819, 9181, 490, 26509, 5352, 5311, 4538
blood vessel development	GO:0001568	1.21711e-05	24	8.9903	765	LTBP1, FAM129B, GLUL, F3, STIM1, CYP1B1, ITGB1, FN1, COL3A1, THBS1, APOE, ANTXR1, COL1A2, UBP1, JAG1, COL5A1, SFRP2, NCL, PTK7, PLXND1, SPARC, CTSH, ITGA5, PKD2	4052, 64855, 2752, 2152, 6786, 1545, 3688, 2335, 1281, 7057, 348, 84168, 1278, 7342, 182, 1289, 6423, 4691, 5754, 23129, 6678, 1512, 3678, 5311
endodermal cell differentiation	GO:0035987	1.3662e-05	6	0.528841	45	COL12A1, FN1, COL11A1, COL5A1, COL5A2, ITGA5	1303, 2335, 1301, 1289, 1290, 3678
ribonucleoprotein complex biogenesis	GO:0022613	2.02066e-05	18	5.74674	489	EBNA1BP2, EDC3, SF3A1, LUC7L, RRS1, MRTO4, SF1, SRSF5, EIF4H, WBP11, RSL1D1, WDR3, RRP9, NPM3, HSP90AB1, RPL38, THUMPD1, RBM22	10969, 80153, 10291, 55692, 23212, 51154, 7536, 6430, 7458, 51729, 26156, 10885, 9136, 10360, 3326, 6169, 55623, 55696
response to stimulus	GO:0050896	2.04542e-05	138	107.543	9151	MYL9, CASP3, LTBP1, TSC2, ITGA8, FAM129B, LMCD1, PLOD1, SIRT2, HMOX2, CDH6, GLUL, PABPC4, CDC42EP4, PRNP, F3, STIM1, COL2A1, NME2, UPRT, TGM2, PRKACB, CYP1B1, ITGAL, WLS, UPP1, KALRN, IDH1, AIF1, ITGB1, NCOA7, KPNA2, VCAM1, RRS1, TPM1, BLMH, HLA-DRA, FN1, SDC2, PNKP, SLC1A3, PHGDH, COL3A1, THBS1, SPP1, RPL23, BCHE, TSPO, FBXO7, ENO3, APOE, YBX1, RBM3, CNOT4, NDUFA12, EPHX1, IGF2R, GSTM4, ANO6, FH…	10398, 836, 4052, 7249, 8516, 64855, 29995, 5351, 22933, 3163, 1004, 2752, 8761, 23580, 5621, 2152, 6786, 1280, 4831, 139596, 7052, 5567, 1545, 3683, 79971, 7378, 8997, 3417, 199, 3688, 135112, 3838, 7412, 23212, 7168, 642, 3122, 2335, 6383, 11284, 6507, 26227, 1281, 7057, 6696, 9349, 590, 706, 25793, 2027, 348, 4904, 5935, 4850, 55967, 2052, 3482, 2948, 196527, 2274, 6430, 754, 1528, 9124, 4355,…
tissue development	GO:0009888	2.33254e-05	44	23.269	1980	CASP3, TSC2, ITGA8, FAM129B, PLOD1, SIRT2, STIM1, COL2A1, NME2, TGM2, POFUT2, PRKACB, CYP1B1, WLS, LUC7L, COL12A1, ITGB1, TPM1, FN1, PHGDH, COL3A1, SPP1, ENO3, ANO6, FHL2, COL11A1, FLNB, JAG1, COL5A1, MINPP1, GPC1, COL5A2, SFRP2, RPL38, PTK7, RCN3, PLXND1, CTHRC1, ICAM1, CTSH, GPC4, ITGA5, PKD2, PLOD3	836, 7249, 8516, 64855, 5351, 22933, 6786, 1280, 4831, 7052, 23275, 5567, 1545, 79971, 55692, 1303, 3688, 7168, 2335, 26227, 1281, 6696, 2027, 196527, 2274, 1301, 2317, 182, 1289, 9562, 2817, 1290, 6423, 6169, 5754, 57333, 23129, 115908, 3383, 1512, 2239, 3678, 5311, 8985
vasculature development	GO:0001944	2.47109e-05	24	9.38987	799	LTBP1, FAM129B, GLUL, F3, STIM1, CYP1B1, ITGB1, FN1, COL3A1, THBS1, APOE, ANTXR1, COL1A2, UBP1, JAG1, COL5A1, SFRP2, NCL, PTK7, PLXND1, SPARC, CTSH, ITGA5, PKD2	4052, 64855, 2752, 2152, 6786, 1545, 3688, 2335, 1281, 7057, 348, 84168, 1278, 7342, 182, 1289, 6423, 4691, 5754, 23129, 6678, 1512, 3678, 5311
endoderm formation	GO:0001706	2.5382e-05	6	0.587601	50	COL12A1, FN1, COL11A1, COL5A1, COL5A2, ITGA5	1303, 2335, 1301, 1289, 1290, 3678
oxoacid metabolic process	GO:0043436	2.56022e-05	29	12.6452	1076	PLOD1, GLUL, ACSS2, CYP1B1, PNKD, IDH1, GLS, BLMH, SLC1A3, PHGDH, ENO3, FADS2, GSTM4, CYB5A, PTGR2, ITIH3, ABCD3, HIBCH, ABHD10, MINPP1, EEF1E1, ABHD14B, GSTP1, LYPLA2, ACBD5, PSAT1, PLOD2, PLOD3, IVD	5351, 2752, 55902, 1545, 25953, 3417, 2744, 642, 6507, 26227, 2027, 9415, 2948, 1528, 145482, 3699, 5825, 26275, 55347, 9562, 9521, 84836, 2950, 11313, 91452, 29968, 5352, 8985, 3712
cell migration	GO:0016477	2.57687e-05	37	18.2039	1549	GLUL, F3, CYP1B1, ITGAL, TNS1, AIF1, ITGB1, VCAM1, TPM1, FN1, SDC2, COL3A1, THBS1, TSPO, APOE, LIMCH1, ANO6, COL1A2, FCER1G, RIPOR1, PLPP1, JAG1, COL5A1, GPC1, MAPRE2, SFRP2, PTK7, NCK2, PLXND1, CTHRC1, GSTP1, ICAM1, SPARC, FUT8, ARHGEF2, CTSH, ITGA5	2752, 2152, 1545, 3683, 7145, 199, 3688, 7412, 7168, 2335, 6383, 1281, 7057, 706, 348, 22998, 196527, 1278, 2207, 79567, 8611, 182, 1289, 2817, 10982, 6423, 5754, 8440, 23129, 115908, 2950, 3383, 6678, 2530, 9181, 1512, 3678
cellular response to growth factor stimulus	GO:0071363	2.78958e-05	22	8.22642	700	CASP3, LTBP1, ITGA8, FAM129B, SIRT2, COL2A1, ITGB1, VCAM1, COL3A1, THBS1, POLR2E, COL1A2, GPC1, SFRP2, HSP90AB1, NCL, SORT1, GSTP1, SPARC, FUT8, MYOF, ITGA5	836, 4052, 8516, 64855, 22933, 1280, 3688, 7412, 1281, 7057, 5434, 1278, 2817, 6423, 3326, 4691, 6272, 2950, 6678, 2530, 26509, 3678
cardiovascular system development	GO:0072358	2.95774e-05	24	9.49563	808	LTBP1, FAM129B, GLUL, F3, STIM1, CYP1B1, ITGB1, FN1, COL3A1, THBS1, APOE, ANTXR1, COL1A2, UBP1, JAG1, COL5A1, SFRP2, NCL, PTK7, PLXND1, SPARC, CTSH, ITGA5, PKD2	4052, 64855, 2752, 2152, 6786, 1545, 3688, 2335, 1281, 7057, 348, 84168, 1278, 7342, 182, 1289, 6423, 4691, 5754, 23129, 6678, 1512, 3678, 5311
organonitrogen compound biosynthetic process	GO:1901566	3.25113e-05	42	22.082	1879	PLOD1, GLUL, PABPC4, ACSS2, NME2, UPRT, POFUT2, UPP1, MAN2A2, GLS, STT3A, B3GAT3, SDC2, SLC1A3, PHGDH, THBS1, RPL23, TSPO, ENO3, APOE, RBM3, GSTM4, EIF4H, GFM1, PLPP1, GPC1, RCVRN, RPL38, NCL, NCK2, EEF1E1, KDELC2, GSTT1, IBA57, GSTP1, FUT8, LARP4B, OSTC, PSAT1, GPC4, PLOD2, PLOD3	5351, 2752, 8761, 55902, 4831, 139596, 23275, 7378, 4122, 2744, 3703, 26229, 6383, 6507, 26227, 7057, 9349, 706, 2027, 348, 5935, 2948, 7458, 85476, 8611, 2817, 5957, 6169, 4691, 8440, 9521, 143888, 2952, 200205, 2950, 2530, 23185, 58505, 29968, 2239, 5352, 8985
negative regulation of cell proliferation	GO:0008285	3.34813e-05	23	8.94329	761	CASP3, TSC2, FAM129B, SIRT2, PRNP, CYP1B1, AIF1, TPM1, THBS1, BCHE, TSPO, APOE, SF1, IGFBP7, PLPP1, SFRP2, ASPH, NCK2, EEF1E1, GSTP1, SPARC, DHRS2, PKD2	836, 7249, 64855, 22933, 5621, 1545, 199, 7168, 7057, 590, 706, 348, 7536, 3490, 8611, 6423, 444, 8440, 9521, 2950, 6678, 10202, 5311
organic acid metabolic process	GO:0006082	3.57982e-05	29	12.8802	1096	PLOD1, GLUL, ACSS2, CYP1B1, PNKD, IDH1, GLS, BLMH, SLC1A3, PHGDH, ENO3, FADS2, GSTM4, CYB5A, PTGR2, ITIH3, ABCD3, HIBCH, ABHD10, MINPP1, EEF1E1, ABHD14B, GSTP1, LYPLA2, ACBD5, PSAT1, PLOD2, PLOD3, IVD	5351, 2752, 55902, 1545, 25953, 3417, 2744, 642, 6507, 26227, 2027, 9415, 2948, 1528, 145482, 3699, 5825, 26275, 55347, 9562, 9521, 84836, 2950, 11313, 91452, 29968, 5352, 8985, 3712
carboxylic acid metabolic process	GO:0019752	3.8659e-05	27	11.5992	987	PLOD1, GLUL, ACSS2, CYP1B1, PNKD, IDH1, GLS, BLMH, SLC1A3, PHGDH, ENO3, FADS2, GSTM4, CYB5A, PTGR2, ITIH3, ABCD3, HIBCH, ABHD10, EEF1E1, GSTP1, LYPLA2, ACBD5, PSAT1, PLOD2, PLOD3, IVD	5351, 2752, 55902, 1545, 25953, 3417, 2744, 642, 6507, 26227, 2027, 9415, 2948, 1528, 145482, 3699, 5825, 26275, 55347, 9521, 2950, 11313, 91452, 29968, 5352, 8985, 3712
response to growth factor	GO:0070848	5.32739e-05	22	8.59073	731	CASP3, LTBP1, ITGA8, FAM129B, SIRT2, COL2A1, ITGB1, VCAM1, COL3A1, THBS1, POLR2E, COL1A2, GPC1, SFRP2, HSP90AB1, NCL, SORT1, GSTP1, SPARC, FUT8, MYOF, ITGA5	836, 4052, 8516, 64855, 22933, 1280, 3688, 7412, 1281, 7057, 5434, 1278, 2817, 6423, 3326, 4691, 6272, 2950, 6678, 2530, 26509, 3678
negative regulation of gastrulation	GO:2000542	5.41108e-05	3	0.0822642	7	COL5A1, COL5A2, SFRP2	1289, 1290, 6423
response to drug	GO:0042493	5.53743e-05	27	11.846	1008	CASP3, PRNP, PRKACB, CYP1B1, AIF1, VCAM1, BLMH, SLC1A3, THBS1, BCHE, TSPO, ENO3, SDF4, IGFBP7, JAG1, ABCD3, SFRP2, HSP90AB1, RANBP2, GSTP1, ICAM1, SPARC, RBM22, ARHGEF2, NUCB1, ND4, SLC1A5	836, 5621, 5567, 1545, 199, 7412, 642, 6507, 7057, 590, 706, 2027, 51150, 3490, 182, 5825, 6423, 3326, 5903, 2950, 3383, 6678, 55696, 9181, 4924, 4538, 6510
regulation of apoptotic process	GO:0042981	5.5766e-05	36	18.1451	1544	CASP3, FAM129B, SIRT2, PRNP, F3, COL2A1, NME2, TGM2, CYP1B1, KALRN, SON, AIF1, ITGB1, RABGGTA, THBS1, TSPO, APOE, IGF2R, ANO6, FHL2, PTTG1IP, FCER1G, CAST, RSL1D1, SFRP2, HSP90AB1, NCK2, EEF1E1, SORT1, GSTP1, ICAM1, ARHGEF2, CTSH, ITGA5, ARHGEF12, DHRS2	836, 64855, 22933, 5621, 2152, 1280, 4831, 7052, 1545, 8997, 6651, 199, 3688, 5875, 7057, 706, 348, 3482, 196527, 2274, 754, 2207, 831, 26156, 6423, 3326, 8440, 9521, 6272, 2950, 3383, 9181, 1512, 3678, 23365, 10202
locomotion	GO:0040011	5.6908e-05	42	22.6226	1925	TSC2, FAM129B, GLUL, F3, CYP1B1, ITGAL, TNS1, AIF1, ITGB1, VCAM1, VPS4A, TPM1, FN1, SDC2, COL3A1, THBS1, TSPO, FBXO7, APOE, LIMCH1, ANO6, COL1A2, FCER1G, RIPOR1, PLPP1, JAG1, COL5A1, GPC1, MAPRE2, SFRP2, PTK7, NCK2, PLXND1, CTHRC1, GSTP1, ICAM1, SPARC, FUT8, ARHGEF2, CTSH, LYPLA2, ITGA5	7249, 64855, 2752, 2152, 1545, 3683, 7145, 199, 3688, 7412, 27183, 7168, 2335, 6383, 1281, 7057, 706, 25793, 348, 22998, 196527, 1278, 2207, 79567, 8611, 182, 1289, 2817, 10982, 6423, 5754, 8440, 23129, 115908, 2950, 3383, 6678, 2530, 9181, 1512, 11313, 3678
cellular component assembly	GO:0022607	6.20766e-05	59	36.208	3081	SIRT2, CDH6, GLUL, CDC42EP4, PRNP, EDC3, NME2, TGM2, PRKACB, SF3A1, TNS1, GRWD1, LUC7L, GLS, AIF1, ITGB1, VPS4A, RRS1, TPM1, HLA-DRA, FN1, RABGGTA, THBS1, APOE, LIMCH1, NDUFA12, SF1, ANO6, SRSF5, EIF4H, ANTXR1, MPP2, COL1A2, COL16A1, FCER1G, TRAPPC4, GPC1, MAPRE2, GJA1, HSP90AB1, RPL38, NCK2, PLXND1, FBLIM1, NIFK, DNAJA4, IBA57, ICAM1, HLA-DRB1, NDUFB4, RBM22, ARHGEF2, RAB8B, GPC4, ITGA5, PKD2, N…	22933, 1004, 2752, 23580, 5621, 80153, 4831, 7052, 5567, 10291, 7145, 83743, 55692, 2744, 199, 3688, 27183, 23212, 7168, 3122, 2335, 5875, 7057, 348, 22998, 55967, 7536, 196527, 6430, 7458, 84168, 4355, 1278, 1307, 2207, 51399, 2817, 10982, 2697, 3326, 6169, 8440, 23129, 54751, 84365, 55466, 200205, 3383, 3123, 4710, 55696, 9181, 51762, 2239, 3678, 5311, 4538, 6510, 8985
response to steroid hormone	GO:0048545	6.33887e-05	15	4.59504	391	CASP3, IDH1, AIF1, THBS1, SPP1, BCHE, TSPO, FHL2, IGFBP7, PLPP1, GSTP1, ICAM1, SPARC, ATP2B1, ATP1A3	836, 3417, 199, 7057, 6696, 590, 706, 2274, 3490, 8611, 2950, 3383, 6678, 490, 478
neurotransmitter metabolic process	GO:0042133	6.47429e-05	9	1.7393	148	CYP1B1, AIF1, SLC1A3, PHGDH, BCHE, TSPO, HSP90AB1, ICAM1, PKD2	1545, 199, 6507, 26227, 590, 706, 3326, 3383, 5311
regulation of cell death	GO:0010941	6.68962e-05	38	19.7787	1683	CASP3, FAM129B, SIRT2, PRNP, F3, COL2A1, NME2, TGM2, CYP1B1, KALRN, SON, AIF1, ITGB1, NCOA7, RABGGTA, THBS1, TSPO, FBXO7, APOE, IGF2R, ANO6, FHL2, PTTG1IP, FCER1G, CAST, RSL1D1, SFRP2, HSP90AB1, NCK2, EEF1E1, SORT1, GSTP1, ICAM1, ARHGEF2, CTSH, ITGA5, ARHGEF12, DHRS2	836, 64855, 22933, 5621, 2152, 1280, 4831, 7052, 1545, 8997, 6651, 199, 3688, 135112, 5875, 7057, 706, 25793, 348, 3482, 196527, 2274, 754, 2207, 831, 26156, 6423, 3326, 8440, 9521, 6272, 2950, 3383, 9181, 1512, 3678, 23365, 10202
regulation of programmed cell death	GO:0043067	6.80107e-05	36	18.3214	1559	CASP3, FAM129B, SIRT2, PRNP, F3, COL2A1, NME2, TGM2, CYP1B1, KALRN, SON, AIF1, ITGB1, RABGGTA, THBS1, TSPO, APOE, IGF2R, ANO6, FHL2, PTTG1IP, FCER1G, CAST, RSL1D1, SFRP2, HSP90AB1, NCK2, EEF1E1, SORT1, GSTP1, ICAM1, ARHGEF2, CTSH, ITGA5, ARHGEF12, DHRS2	836, 64855, 22933, 5621, 2152, 1280, 4831, 7052, 1545, 8997, 6651, 199, 3688, 5875, 7057, 706, 348, 3482, 196527, 2274, 754, 2207, 831, 26156, 6423, 3326, 8440, 9521, 6272, 2950, 3383, 9181, 1512, 3678, 23365, 10202
regulation of peptidase activity	GO:0052547	6.80228e-05	16	5.17089	440	CASP3, F3, PZP, FN1, THBS1, ANTXR1, C4A, CAST, APLP2, ITIH3, SFRP2, ANXA8, ASPH, RCN3, CST3, CTSH	836, 2152, 5858, 2335, 7057, 84168, 720, 831, 334, 3699, 6423, 653145, 444, 57333, 1471, 1512
alpha-amino acid metabolic process	GO:1901605	7.17583e-05	11	2.63245	224	PLOD1, GLUL, GLS, BLMH, SLC1A3, PHGDH, HIBCH, PSAT1, PLOD2, PLOD3, IVD	5351, 2752, 2744, 642, 6507, 26227, 26275, 29968, 5352, 8985, 3712
organic substance metabolic process	GO:0071704	8.15116e-05	167	140.813	11982	CASP3, LTBP1, TSC2, ITGA8, FAM129B, LMCD1, PLOD1, EBNA1BP2, LACTB2, SIRT2, HMOX2, GLUL, PABPC4, PRNP, F3, EDC3, NUP210, ACSS2, COL2A1, NME2, UPRT, TGM2, POFUT2, PRKACB, CYP1B1, SF3A1, UPP1, GNL3, KALRN, GRWD1, PNKD, IDH1, LUC7L, SON, MAN2A2, GLS, PZP, STT3A, AIF1, ITGB1, NCOA7, KPNA2, VCAM1, VPS4A, RRS1, BLMH, MRTO4, FN1, B3GAT3, SDC2, PNKP, SLC1A3, PHGDH, COL3A1, RABGGTA, THBS1, SPP1, RPL23, BCH…	836, 4052, 7249, 8516, 64855, 29995, 5351, 10969, 51110, 22933, 3163, 2752, 8761, 5621, 2152, 80153, 23225, 55902, 1280, 4831, 139596, 7052, 23275, 5567, 1545, 10291, 7378, 26354, 8997, 83743, 25953, 3417, 55692, 6651, 4122, 2744, 5858, 3703, 199, 3688, 135112, 3838, 7412, 27183, 23212, 642, 51154, 2335, 26229, 6383, 11284, 6507, 26227, 1281, 5875, 7057, 6696, 9349, 590, 706, 25793, 2027, 348, 49…
regulation of proteolysis	GO:0030162	8.49173e-05	23	9.50739	809	CASP3, SIRT2, PRNP, F3, PRKACB, PZP, FN1, THBS1, RPL23, APOE, ANTXR1, C4A, CAST, C1QB, APLP2, ITIH3, SFRP2, HSP90AB1, ANXA8, ASPH, RCN3, CST3, CTSH	836, 22933, 5621, 2152, 5567, 5858, 2335, 7057, 9349, 348, 84168, 720, 831, 713, 334, 3699, 6423, 3326, 653145, 444, 57333, 1471, 1512
peptidyl-lysine hydroxylation	GO:0017185	8.58216e-05	3	0.0940162	8	PLOD1, PLOD2, PLOD3	5351, 5352, 8985
cellular metabolic process	GO:0044237	8.85448e-05	158	131.129	11158	CASP3, LTBP1, TSC2, ITGA8, FAM129B, LMCD1, PLOD1, EBNA1BP2, LACTB2, SIRT2, HMOX2, GLUL, PABPC4, PRNP, F3, EDC3, ACSS2, COL2A1, NME2, UPRT, TGM2, POFUT2, PRKACB, CYP1B1, SF3A1, UPP1, GNL3, KALRN, GRWD1, PNKD, IDH1, LUC7L, SON, MAN2A2, GLS, PZP, STT3A, AIF1, ITGB1, NCOA7, KPNA2, VPS4A, RRS1, BLMH, MRTO4, FN1, B3GAT3, SDC2, PNKP, SLC1A3, PHGDH, COL3A1, RABGGTA, THBS1, SPP1, RPL23, BCHE, TSPO, FBXO7,…	836, 4052, 7249, 8516, 64855, 29995, 5351, 10969, 51110, 22933, 3163, 2752, 8761, 5621, 2152, 80153, 55902, 1280, 4831, 139596, 7052, 23275, 5567, 1545, 10291, 7378, 26354, 8997, 83743, 25953, 3417, 55692, 6651, 4122, 2744, 5858, 3703, 199, 3688, 135112, 3838, 27183, 23212, 642, 51154, 2335, 26229, 6383, 11284, 6507, 26227, 1281, 5875, 7057, 6696, 9349, 590, 706, 25793, 2027, 348, 4904, 22998, 59…
organic substance catabolic process	GO:1901575	9.1616e-05	44	24.644	2097	CASP3, SIRT2, HMOX2, GLUL, PABPC4, EDC3, CYP1B1, UPP1, PNKD, IDH1, GLS, VPS4A, BLMH, MRTO4, SDC2, SPP1, RPL23, FBXO7, ENO3, APOE, YBX1, CNOT4, PTTG1IP, TNKS1BP1, ABCD3, HIBCH, ABHD10, GPC1, HSP90AB1, RPL38, UBR4, PAFAH1B3, OTUD7B, RCN3, FUT8, CST3, PLD4, CTSH, LYPLA2, ACBD5, GPC4, WDR91, SAT2, IVD	836, 22933, 3163, 2752, 8761, 80153, 1545, 7378, 25953, 3417, 2744, 27183, 642, 51154, 6383, 6696, 9349, 25793, 2027, 348, 4904, 4850, 754, 85456, 5825, 26275, 55347, 2817, 3326, 6169, 23352, 5050, 56957, 57333, 2530, 1471, 122618, 1512, 11313, 91452, 2239, 29062, 112483, 3712
embryo development	GO:0009790	0.000100707	26	11.5992	987	TSC2, ITGA8, FAM129B, COL2A1, POFUT2, PRKACB, WLS, COL12A1, ITGB1, TPM1, FN1, PHGDH, COL11A1, COL5A1, TM4SF1, COL5A2, SFRP2, RPL38, PTK7, CTHRC1, FUT8, ITGA5, PKD2, ND4, SLC30A1, PLOD3	7249, 8516, 64855, 1280, 23275, 5567, 79971, 1303, 3688, 7168, 2335, 26227, 1301, 1289, 4071, 1290, 6423, 6169, 5754, 115908, 2530, 3678, 5311, 4538, 7779, 8985
tube development	GO:0035295	0.000103982	28	12.986	1105	TSC2, FAM129B, GLUL, F3, STIM1, COL2A1, TGM2, PRKACB, CYP1B1, ITGB1, FN1, PHGDH, COL3A1, THBS1, APOE, UBP1, JAG1, SFRP2, NCL, PTK7, RCN3, PLXND1, CTHRC1, SPARC, CTSH, ITGA5, PKD2, PLOD3	7249, 64855, 2752, 2152, 6786, 1280, 7052, 5567, 1545, 3688, 2335, 26227, 1281, 7057, 348, 7342, 182, 6423, 4691, 5754, 57333, 23129, 115908, 6678, 1512, 3678, 5311, 8985
post-translational protein modification	GO:0043687	0.000105366	14	4.26598	363	LTBP1, FN1, SDC2, RABGGTA, SPP1, FBXO7, APOE, FN3KRP, C4A, IGFBP7, APLP2, CST3, COPS7B, NUCB1	4052, 2335, 6383, 5875, 6696, 25793, 348, 79672, 720, 3490, 334, 1471, 64708, 4924
regulation of anatomical structure morphogenesis	GO:0022603	0.000108865	28	13.0212	1108	FAM129B, GLUL, CDC42EP4, F3, STIM1, CYP1B1, KALRN, ITGB1, TPM1, FN1, SDC2, THBS1, SPP1, APOE, JAG1, COL5A1, COL5A2, SFRP2, PTK7, PLXND1, FBLIM1, CTHRC1, ICAM1, SPARC, CST3, CTSH, GPC4, ITGA5	64855, 2752, 23580, 2152, 6786, 1545, 8997, 3688, 7168, 2335, 6383, 7057, 6696, 348, 182, 1289, 1290, 6423, 5754, 23129, 54751, 115908, 3383, 6678, 1471, 1512, 2239, 3678
cellular response to organonitrogen compound	GO:0071417	0.000121161	18	6.60464	562	CASP3, TSC2, SIRT2, PRNP, PRKACB, AIF1, COL3A1, RPL23, SRSF5, COL1A2, COL16A1, COL5A2, GSTP1, ICAM1, ARHGEF2, RAB8B, PKD2, ATP1A3	836, 7249, 22933, 5621, 5567, 199, 1281, 9349, 6430, 1278, 1307, 1290, 2950, 3383, 9181, 51762, 5311, 478
protein-containing complex assembly	GO:0065003	0.000126431	41	22.6696	1929	SIRT2, GLUL, CDC42EP4, PRNP, EDC3, NME2, TGM2, PRKACB, SF3A1, GRWD1, LUC7L, GLS, AIF1, RRS1, HLA-DRA, FN1, RABGGTA, APOE, NDUFA12, SF1, ANO6, SRSF5, EIF4H, MPP2, COL1A2, COL16A1, FCER1G, TRAPPC4, HSP90AB1, RPL38, NCK2, FBLIM1, NIFK, ICAM1, HLA-DRB1, NDUFB4, RBM22, ARHGEF2, PKD2, ND4, SLC1A5	22933, 2752, 23580, 5621, 80153, 4831, 7052, 5567, 10291, 83743, 55692, 2744, 199, 23212, 3122, 2335, 5875, 348, 55967, 7536, 196527, 6430, 7458, 4355, 1278, 1307, 2207, 51399, 3326, 6169, 8440, 54751, 84365, 3383, 3123, 4710, 55696, 9181, 5311, 4538, 6510
cell adhesion mediated by integrin	GO:0033627	0.000135028	6	0.787385	67	CYP1B1, ITGB1, COL16A1, SFRP2, ICAM1, ITGA5	1545, 3688, 1307, 6423, 3383, 3678
secretion by cell	GO:0032940	0.000136325	34	17.487	1488	FAM129B, HMOX2, GLUL, NME2, ITGAL, WLS, KALRN, PNKD, IDH1, GLS, VPS4A, FN1, SLC1A3, THBS1, SPP1, IGF2R, ANO6, FCER1G, SDF4, APLP2, ITIH3, HSP90AB1, UBR4, RCN3, CHID1, GSTP1, M6PR, COMMD9, SPARC, CST3, CTSH, RAB8B, SLC1A5, SLC30A1	64855, 3163, 2752, 4831, 3683, 79971, 8997, 25953, 3417, 2744, 27183, 2335, 6507, 7057, 6696, 3482, 196527, 2207, 51150, 334, 3699, 3326, 23352, 57333, 66005, 2950, 4074, 29099, 6678, 1471, 1512, 51762, 6510, 7779
protein-carbohydrate complex assembly	GO:0065006	0.000137484	2	0.023504	2	HLA-DRA, HLA-DRB1	3122, 3123
activation of blood coagulation via clotting cascade	GO:0002543	0.000137484	2	0.023504	2	F3, ANO6	2152, 196527
protein-carbohydrate complex subunit organization	GO:0071823	0.000137484	2	0.023504	2	HLA-DRA, HLA-DRB1	3122, 3123
antigen processing and presentation of polysaccharide antigen via MHC class II	GO:0002505	0.000137484	2	0.023504	2	HLA-DRA, HLA-DRB1	3122, 3123
polysaccharide assembly with MHC class II protein complex	GO:0002506	0.000137484	2	0.023504	2	HLA-DRA, HLA-DRB1	3122, 3123
rRNA metabolic process	GO:0016072	0.000142404	11	2.84399	242	EBNA1BP2, RRS1, MRTO4, WBP11, RSL1D1, WDR3, RRP9, NPM3, NCL, THUMPD1, NIFK	10969, 23212, 51154, 51729, 26156, 10885, 9136, 10360, 4691, 55623, 84365
secretion	GO:0046903	0.000154528	36	19.0853	1624	FAM129B, HMOX2, GLUL, NME2, UPRT, POFUT2, ITGAL, WLS, KALRN, PNKD, IDH1, GLS, VPS4A, FN1, SLC1A3, THBS1, SPP1, IGF2R, ANO6, FCER1G, SDF4, APLP2, ITIH3, HSP90AB1, UBR4, RCN3, CHID1, GSTP1, M6PR, COMMD9, SPARC, CST3, CTSH, RAB8B, SLC1A5, SLC30A1	64855, 3163, 2752, 4831, 139596, 23275, 3683, 79971, 8997, 25953, 3417, 2744, 27183, 2335, 6507, 7057, 6696, 3482, 196527, 2207, 51150, 334, 3699, 3326, 23352, 57333, 66005, 2950, 4074, 29099, 6678, 1471, 1512, 51762, 6510, 7779
heart development	GO:0007507	0.000157454	18	6.74566	574	CASP3, LTBP1, TSC2, COL2A1, ITGB1, VCAM1, TPM1, COL3A1, FHL2, COL11A1, JAG1, COL5A1, GJA1, SFRP2, PTK7, PLXND1, SPARC, PKD2	836, 4052, 7249, 1280, 3688, 7412, 7168, 1281, 2274, 1301, 182, 1289, 2697, 6423, 5754, 23129, 6678, 5311
carbohydrate derivative metabolic process	GO:1901135	0.000161151	29	14.0319	1194	PLOD1, ACSS2, COL2A1, NME2, UPRT, POFUT2, UPP1, MAN2A2, STT3A, B3GAT3, SDC2, TSPO, ENO3, NDUFA12, COL11A1, ITIH3, ABHD10, GPC1, KDELC2, ABHD14B, NDUFB4, FUT8, CST3, OSTC, GPC4, PLOD2, COQ9, ND4, PLOD3	5351, 55902, 1280, 4831, 139596, 23275, 7378, 4122, 3703, 26229, 6383, 706, 2027, 55967, 1301, 3699, 55347, 2817, 143888, 84836, 4710, 2530, 1471, 58505, 2239, 5352, 57017, 4538, 8985
cell junction organization	GO:0034330	0.000161524	12	3.38458	288	CDH6, CADM3, TNS1, FN1, THBS1, LIMCH1, COL16A1, MAPRE2, GJA1, FBLIM1, RAB8B, ITGA5	1004, 57863, 7145, 2335, 7057, 22998, 1307, 10982, 2697, 54751, 51762, 3678
positive regulation of reactive oxygen species metabolic process	GO:2000379	0.000167586	7	1.16345	99	AIF1, THBS1, TSPO, HSP90AB1, GSTP1, ICAM1, PKD2	199, 7057, 706, 3326, 2950, 3383, 5311
regulation of cell proliferation	GO:0042127	0.000172402	37	19.9432	1697	CASP3, TSC2, FAM129B, SIRT2, GLUL, PRNP, F3, NME2, TGM2, CYP1B1, GNL3, MARCKSL1, AIF1, ITGB1, VCAM1, TPM1, FN1, THBS1, RPL23, BCHE, TSPO, APOE, SF1, IGFBP7, PLPP1, JAG1, SFRP2, ASPH, NCK2, EEF1E1, CTHRC1, GSTP1, SPARC, ARHGEF2, CTSH, DHRS2, PKD2	836, 7249, 64855, 22933, 2752, 5621, 2152, 4831, 7052, 1545, 26354, 65108, 199, 3688, 7412, 7168, 2335, 7057, 9349, 590, 706, 348, 7536, 3490, 8611, 182, 6423, 444, 8440, 9521, 115908, 2950, 6678, 9181, 1512, 10202, 5311
embryonic morphogenesis	GO:0048598	0.000175194	18	6.80442	579	TSC2, ITGA8, COL2A1, POFUT2, PRKACB, WLS, COL12A1, ITGB1, FN1, COL11A1, COL5A1, COL5A2, SFRP2, RPL38, PTK7, CTHRC1, ITGA5, PKD2	7249, 8516, 1280, 23275, 5567, 79971, 1303, 3688, 2335, 1301, 1289, 1290, 6423, 6169, 5754, 115908, 3678, 5311
blood coagulation	GO:0007596	0.000180182	13	3.94868	336	MYL9, PABPC4, F3, PRKACB, COL3A1, THBS1, APOE, ANO6, COL1A2, FCER1G, DGKA, ANXA8, CSRP1	10398, 8761, 2152, 5567, 1281, 7057, 348, 196527, 1278, 2207, 1606, 653145, 1465
cell motility	GO:0048870	0.000182834	37	20.0019	1702	GLUL, F3, CYP1B1, ITGAL, TNS1, AIF1, ITGB1, VCAM1, TPM1, FN1, SDC2, COL3A1, THBS1, TSPO, APOE, LIMCH1, ANO6, COL1A2, FCER1G, RIPOR1, PLPP1, JAG1, COL5A1, GPC1, MAPRE2, SFRP2, PTK7, NCK2, PLXND1, CTHRC1, GSTP1, ICAM1, SPARC, FUT8, ARHGEF2, CTSH, ITGA5	2752, 2152, 1545, 3683, 7145, 199, 3688, 7412, 7168, 2335, 6383, 1281, 7057, 706, 348, 22998, 196527, 1278, 2207, 79567, 8611, 182, 1289, 2817, 10982, 6423, 5754, 8440, 23129, 115908, 2950, 3383, 6678, 2530, 9181, 1512, 3678
localization of cell	GO:0051674	0.000182834	37	20.0019	1702	GLUL, F3, CYP1B1, ITGAL, TNS1, AIF1, ITGB1, VCAM1, TPM1, FN1, SDC2, COL3A1, THBS1, TSPO, APOE, LIMCH1, ANO6, COL1A2, FCER1G, RIPOR1, PLPP1, JAG1, COL5A1, GPC1, MAPRE2, SFRP2, PTK7, NCK2, PLXND1, CTHRC1, GSTP1, ICAM1, SPARC, FUT8, ARHGEF2, CTSH, ITGA5	2752, 2152, 1545, 3683, 7145, 199, 3688, 7412, 7168, 2335, 6383, 1281, 7057, 706, 348, 22998, 196527, 1278, 2207, 79567, 8611, 182, 1289, 2817, 10982, 6423, 5754, 8440, 23129, 115908, 2950, 3383, 6678, 2530, 9181, 1512, 3678
ossification	GO:0001503	0.000189206	14	4.51278	384	COL2A1, SPP1, ANO6, FHL2, RSL1D1, COL11A1, JAG1, MINPP1, COL5A2, SFRP2, RPL38, CTHRC1, SORT1, SPARC	1280, 6696, 196527, 2274, 26156, 1301, 182, 9562, 1290, 6423, 6169, 115908, 6272, 6678
positive regulation of apoptotic process	GO:0043065	0.000192475	19	7.47429	636	CASP3, SIRT2, PRNP, F3, TGM2, CYP1B1, KALRN, ITGB1, THBS1, TSPO, IGF2R, ANO6, SFRP2, NCK2, EEF1E1, SORT1, ARHGEF2, CTSH, ARHGEF12	836, 22933, 5621, 2152, 7052, 1545, 8997, 3688, 7057, 706, 3482, 196527, 6423, 8440, 9521, 6272, 9181, 1512, 23365
heterophilic cell-cell adhesion via plasma membrane cell adhesion molecules	GO:0007157	0.000198272	5	0.540593	46	CADM3, ITGAL, VCAM1, ICAM1, ITGA5	57863, 3683, 7412, 3383, 3678
neurotransmitter biosynthetic process	GO:0042136	0.000201809	7	1.19871	102	CYP1B1, AIF1, SLC1A3, TSPO, HSP90AB1, ICAM1, PKD2	1545, 199, 6507, 706, 3326, 3383, 5311
cellular response to xenobiotic stimulus	GO:0071466	0.000203561	9	2.02135	172	CYP1B1, AIF1, PHGDH, BCHE, EPHX1, GSTM4, HSP90AB1, GSTP1, ICAM1	1545, 199, 26227, 590, 2052, 2948, 3326, 2950, 3383
hemostasis	GO:0007599	0.000208129	13	4.00744	341	MYL9, PABPC4, F3, PRKACB, COL3A1, THBS1, APOE, ANO6, COL1A2, FCER1G, DGKA, ANXA8, CSRP1	10398, 8761, 2152, 5567, 1281, 7057, 348, 196527, 1278, 2207, 1606, 653145, 1465
positive regulation of programmed cell death	GO:0043068	0.000208391	19	7.52129	640	CASP3, SIRT2, PRNP, F3, TGM2, CYP1B1, KALRN, ITGB1, THBS1, TSPO, IGF2R, ANO6, SFRP2, NCK2, EEF1E1, SORT1, ARHGEF2, CTSH, ARHGEF12	836, 22933, 5621, 2152, 7052, 1545, 8997, 3688, 7057, 706, 3482, 196527, 6423, 8440, 9521, 6272, 9181, 1512, 23365
tube morphogenesis	GO:0035239	0.000211588	24	10.7884	918	TSC2, FAM129B, GLUL, F3, STIM1, TGM2, PRKACB, CYP1B1, ITGB1, FN1, COL3A1, THBS1, APOE, UBP1, JAG1, SFRP2, NCL, PTK7, PLXND1, CTHRC1, SPARC, CTSH, ITGA5, PKD2	7249, 64855, 2752, 2152, 6786, 7052, 5567, 1545, 3688, 2335, 1281, 7057, 348, 7342, 182, 6423, 4691, 5754, 23129, 115908, 6678, 1512, 3678, 5311
coagulation	GO:0050817	0.000214144	13	4.01919	342	MYL9, PABPC4, F3, PRKACB, COL3A1, THBS1, APOE, ANO6, COL1A2, FCER1G, DGKA, ANXA8, CSRP1	10398, 8761, 2152, 5567, 1281, 7057, 348, 196527, 1278, 2207, 1606, 653145, 1465
nitric oxide biosynthetic process	GO:0006809	0.000217252	6	0.857898	73	CYP1B1, AIF1, TSPO, HSP90AB1, ICAM1, PKD2	1545, 199, 706, 3326, 3383, 5311
negative regulation of embryonic development	GO:0045992	0.000226414	4	0.305553	26	PRKACB, COL5A1, COL5A2, SFRP2	5567, 1289, 1290, 6423
catabolic process	GO:0009056	0.000233364	49	29.6856	2526	CASP3, TSC2, SIRT2, HMOX2, GLUL, PABPC4, EDC3, CYP1B1, UPP1, PNKD, IDH1, GLS, ITGB1, VPS4A, BLMH, MRTO4, SDC2, SPP1, RPL23, TSPO, FBXO7, ENO3, APOE, YBX1, CNOT4, EPHX1, GSTM4, PTTG1IP, TNKS1BP1, ABCD3, HIBCH, ABHD10, GPC1, HSP90AB1, RPL38, UBR4, PAFAH1B3, OTUD7B, RCN3, FUT8, CST3, PLD4, CTSH, LYPLA2, ACBD5, GPC4, WDR91, SAT2, IVD	836, 7249, 22933, 3163, 2752, 8761, 80153, 1545, 7378, 25953, 3417, 2744, 3688, 27183, 642, 51154, 6383, 6696, 9349, 706, 25793, 2027, 348, 4904, 4850, 2052, 2948, 754, 85456, 5825, 26275, 55347, 2817, 3326, 6169, 23352, 5050, 56957, 57333, 2530, 1471, 122618, 1512, 11313, 91452, 2239, 29062, 112483, 3712
endoderm development	GO:0007492	0.000234131	6	0.86965	74	COL12A1, FN1, COL11A1, COL5A1, COL5A2, ITGA5	1303, 2335, 1301, 1289, 1290, 3678
protein hydroxylation	GO:0018126	0.000263353	4	0.317305	27	PLOD1, ASPH, PLOD2, PLOD3	5351, 444, 5352, 8985
response to osmotic stress	GO:0006970	0.000270977	6	0.893154	76	CASP3, TSPO, HSP90AB1, TSC22D2, ARHGEF2, PKD2	836, 706, 3326, 9819, 9181, 5311
nitric oxide metabolic process	GO:0046209	0.00029103	6	0.904906	77	CYP1B1, AIF1, TSPO, HSP90AB1, ICAM1, PKD2	1545, 199, 706, 3326, 3383, 5311
glycoprotein metabolic process	GO:0009100	0.000317336	14	4.74782	404	PLOD1, COL2A1, POFUT2, MAN2A2, STT3A, B3GAT3, COL11A1, GPC1, KDELC2, FUT8, CST3, OSTC, PLOD2, PLOD3	5351, 1280, 23275, 4122, 3703, 26229, 1301, 2817, 143888, 2530, 1471, 58505, 5352, 8985
cell-matrix adhesion	GO:0007160	0.000329223	10	2.63245	224	ITGA8, ITGAL, ITGB1, VCAM1, FN1, COL3A1, THBS1, LIMCH1, COL16A1, JAG1	8516, 3683, 3688, 7412, 2335, 1281, 7057, 22998, 1307, 182
response to glucocorticoid	GO:0051384	0.00035234	8	1.72755	147	CASP3, AIF1, BCHE, IGFBP7, GSTP1, ICAM1, SPARC, ATP2B1	836, 199, 590, 3490, 2950, 3383, 6678, 490
cell morphogenesis	GO:0000902	0.000355258	25	11.8695	1010	CASP3, ITGA8, FAM129B, CDH6, CDC42EP4, KALRN, COL12A1, ITGB1, TPM1, FN1, SDC2, SLC1A3, SPP1, APOE, ANTXR1, FLNB, GPC1, HSP90AB1, PLXND1, FBLIM1, ICAM1, SPARC, ARHGEF2, LYPLA2, PLOD3	836, 8516, 64855, 1004, 23580, 8997, 1303, 3688, 7168, 2335, 6383, 6507, 6696, 348, 84168, 2317, 2817, 3326, 23129, 54751, 3383, 6678, 9181, 11313, 8985
reactive nitrogen species metabolic process	GO:2001057	0.000358253	6	0.940162	80	CYP1B1, AIF1, TSPO, HSP90AB1, ICAM1, PKD2	1545, 199, 706, 3326, 3383, 5311
collagen metabolic process	GO:0032963	0.000358661	7	1.31623	112	PLOD1, ITGB1, COL5A1, RCN3, CST3, PLOD2, PLOD3	5351, 3688, 1289, 57333, 1471, 5352, 8985
response to amino acid	GO:0043200	0.000358661	7	1.31623	112	CASP3, COL3A1, COL1A2, COL16A1, COL5A2, GSTP1, ICAM1	836, 1281, 1278, 1307, 1290, 2950, 3383
regulation of reactive oxygen species metabolic process	GO:2000377	0.00036342	9	2.18588	186	SIRT2, CYP1B1, AIF1, THBS1, TSPO, HSP90AB1, GSTP1, ICAM1, PKD2	22933, 1545, 199, 7057, 706, 3326, 2950, 3383, 5311
response to toxic substance	GO:0009636	0.000396769	16	6.04054	514	CASP3, CYP1B1, VCAM1, BLMH, APOE, EPHX1, SDF4, RANBP2, GSTT1, GSTP1, ICAM1, SPARC, NUCB1, DHRS2, ND4, SLC30A1	836, 1545, 7412, 642, 348, 2052, 51150, 5903, 2952, 2950, 3383, 6678, 4924, 10202, 4538, 7779
negative regulation of endodermal cell differentiation	GO:1903225	0.000407648	2	0.0352561	3	COL5A1, COL5A2	1289, 1290
response to caloric restriction	GO:0061771	0.000407648	2	0.0352561	3	SIRT2, APOE	22933, 348
cellular response to nitrogen compound	GO:1901699	0.000407689	18	7.29801	621	CASP3, TSC2, SIRT2, PRNP, PRKACB, AIF1, COL3A1, RPL23, SRSF5, COL1A2, COL16A1, COL5A2, GSTP1, ICAM1, ARHGEF2, RAB8B, PKD2, ATP1A3	836, 7249, 22933, 5621, 5567, 199, 1281, 9349, 6430, 1278, 1307, 1290, 2950, 3383, 9181, 51762, 5311, 478
aorta development	GO:0035904	0.000461892	5	0.646361	55	LTBP1, COL3A1, JAG1, PLXND1, PKD2	4052, 1281, 182, 23129, 5311
metabolic process	GO:0008152	0.000463535	169	146.324	12451	CASP3, LTBP1, TSC2, ITGA8, FAM129B, LMCD1, PLOD1, EBNA1BP2, LACTB2, SIRT2, HMOX2, GLUL, PABPC4, PRNP, F3, EDC3, NUP210, ACSS2, COL2A1, NME2, UPRT, TGM2, POFUT2, PRKACB, CYP1B1, SF3A1, UPP1, GNL3, KALRN, GRWD1, PNKD, IDH1, LUC7L, SON, MAN2A2, GLS, PZP, STT3A, AIF1, ITGB1, NCOA7, KPNA2, VCAM1, VPS4A, RRS1, BLMH, MRTO4, FN1, B3GAT3, SDC2, PNKP, SLC1A3, PHGDH, COL3A1, RABGGTA, THBS1, SELENBP1, SPP1, …	836, 4052, 7249, 8516, 64855, 29995, 5351, 10969, 51110, 22933, 3163, 2752, 8761, 5621, 2152, 80153, 23225, 55902, 1280, 4831, 139596, 7052, 23275, 5567, 1545, 10291, 7378, 26354, 8997, 83743, 25953, 3417, 55692, 6651, 4122, 2744, 5858, 3703, 199, 3688, 135112, 3838, 7412, 27183, 23212, 642, 51154, 2335, 26229, 6383, 11284, 6507, 26227, 1281, 5875, 7057, 8991, 6696, 9349, 590, 706, 25793, 2027, 3…
xenobiotic metabolic process	GO:0006805	0.000467356	7	1.37499	117	CYP1B1, PHGDH, BCHE, EPHX1, GSTM4, HSP90AB1, GSTP1	1545, 26227, 590, 2052, 2948, 3326, 2950
primary metabolic process	GO:0044238	0.000476965	155	131.188	11163	CASP3, LTBP1, TSC2, ITGA8, FAM129B, LMCD1, PLOD1, EBNA1BP2, LACTB2, SIRT2, GLUL, PABPC4, PRNP, F3, EDC3, ACSS2, COL2A1, NME2, UPRT, TGM2, POFUT2, PRKACB, CYP1B1, SF3A1, UPP1, GNL3, KALRN, GRWD1, PNKD, IDH1, LUC7L, SON, MAN2A2, GLS, PZP, STT3A, AIF1, NCOA7, KPNA2, VPS4A, RRS1, BLMH, MRTO4, FN1, B3GAT3, SDC2, PNKP, SLC1A3, PHGDH, COL3A1, RABGGTA, THBS1, SPP1, RPL23, TSPO, FBXO7, ENO3, APOE, YBX1, L…	836, 4052, 7249, 8516, 64855, 29995, 5351, 10969, 51110, 22933, 2752, 8761, 5621, 2152, 80153, 55902, 1280, 4831, 139596, 7052, 23275, 5567, 1545, 10291, 7378, 26354, 8997, 83743, 25953, 3417, 55692, 6651, 4122, 2744, 5858, 3703, 199, 135112, 3838, 27183, 23212, 642, 51154, 2335, 26229, 6383, 11284, 6507, 26227, 1281, 5875, 7057, 6696, 9349, 706, 25793, 2027, 348, 4904, 22998, 5935, 4850, 55967, …
cellular amino acid metabolic process	GO:0006520	0.00048462	12	3.81941	325	PLOD1, GLUL, GLS, BLMH, SLC1A3, PHGDH, HIBCH, EEF1E1, PSAT1, PLOD2, PLOD3, IVD	5351, 2752, 2744, 642, 6507, 26227, 26275, 9521, 29968, 5352, 8985, 3712
blood vessel morphogenesis	GO:0048514	0.000493107	19	8.06189	686	FAM129B, GLUL, F3, STIM1, CYP1B1, ITGB1, FN1, COL3A1, THBS1, APOE, UBP1, JAG1, SFRP2, NCL, PLXND1, SPARC, CTSH, ITGA5, PKD2	64855, 2752, 2152, 6786, 1545, 3688, 2335, 1281, 7057, 348, 7342, 182, 6423, 4691, 23129, 6678, 1512, 3678, 5311
regulation of hydrolase activity	GO:0051336	0.000529398	29	15.0778	1283	CASP3, TSC2, F3, KALRN, PZP, ITGB1, TPM1, FN1, B3GAT3, THBS1, ANTXR1, C4A, CAST, APLP2, ITIH3, MAPRE2, SFRP2, HSP90AB1, ANXA8, ASPH, RANBP2, RCN3, PLXND1, SORT1, ICAM1, CST3, CTSH, TPM2, ARHGEF12	836, 7249, 2152, 8997, 5858, 3688, 7168, 2335, 26229, 7057, 84168, 720, 831, 334, 3699, 10982, 6423, 3326, 653145, 444, 5903, 57333, 23129, 6272, 3383, 1471, 1512, 7169, 23365
response to hormone	GO:0009725	0.000537085	24	11.5052	979	CASP3, TSC2, NME2, UPRT, PRKACB, IDH1, AIF1, THBS1, SPP1, BCHE, TSPO, FHL2, SRSF5, IGFBP7, PLPP1, SORT1, GSTP1, ICAM1, SPARC, CTSH, ATP2B1, RAB8B, PLOD3, ATP1A3	836, 7249, 4831, 139596, 5567, 3417, 199, 7057, 6696, 590, 706, 2274, 6430, 3490, 8611, 6272, 2950, 3383, 6678, 1512, 490, 51762, 8985, 478
response to xenobiotic stimulus	GO:0009410	0.000542627	11	3.32582	283	PRKACB, CYP1B1, AIF1, PHGDH, BCHE, EPHX1, GSTM4, HSP90AB1, RANBP2, GSTP1, ICAM1	5567, 1545, 199, 26227, 590, 2052, 2948, 3326, 5903, 2950, 3383
positive regulation of cell death	GO:0010942	0.000557676	19	8.14415	693	CASP3, SIRT2, PRNP, F3, TGM2, CYP1B1, KALRN, ITGB1, THBS1, TSPO, IGF2R, ANO6, SFRP2, NCK2, EEF1E1, SORT1, ARHGEF2, CTSH, ARHGEF12	836, 22933, 5621, 2152, 7052, 1545, 8997, 3688, 7057, 706, 3482, 196527, 6423, 8440, 9521, 6272, 9181, 1512, 23365
response to vitamin	GO:0033273	0.000634859	6	1.04593	89	SPP1, BCHE, TSPO, GSTP1, SPARC, ATP2B1	6696, 590, 706, 2950, 6678, 490
neural tube development	GO:0021915	0.000645366	8	1.89208	161	TSC2, PRKACB, PHGDH, SFRP2, PTK7, CTHRC1, PKD2, PLOD3	7249, 5567, 26227, 6423, 5754, 115908, 5311, 8985
monocarboxylic acid metabolic process	GO:0032787	0.000654692	17	6.9572	592	ACSS2, CYP1B1, PNKD, IDH1, SLC1A3, PHGDH, ENO3, FADS2, GSTM4, PTGR2, ABCD3, HIBCH, ABHD10, GSTP1, LYPLA2, ACBD5, IVD	55902, 1545, 25953, 3417, 6507, 26227, 2027, 9415, 2948, 145482, 5825, 26275, 55347, 2950, 11313, 91452, 3712
establishment of planar polarity involved in neural tube closure	GO:0090177	0.000656208	3	0.17628	15	SFRP2, PTK7, CTHRC1	6423, 5754, 115908
lipid metabolic process	GO:0006629	0.000662677	31	16.7819	1428	SIRT2, ACSS2, CYP1B1, IDH1, SDC2, SPP1, TSPO, APOE, FDFT1, FADS2, SF1, GSTM4, FHL2, HDLBP, DGKA, PTGR2, IGFBP7, PLPP1, ABCD3, HIBCH, GPC1, PAFAH1B3, GSTP1, PLD4, LYPLA2, ACBD5, GPC4, SERINC1, DHRS2, WDR91, IVD	22933, 55902, 1545, 3417, 6383, 6696, 706, 348, 2222, 9415, 7536, 2948, 2274, 3069, 1606, 145482, 3490, 8611, 5825, 26275, 2817, 5050, 2950, 122618, 11313, 91452, 2239, 57515, 10202, 29062, 3712
small molecule biosynthetic process	GO:0044283	0.000678271	20	8.94329	761	PLOD1, GLUL, ACSS2, NME2, UPRT, UPP1, GLS, SLC1A3, PHGDH, ENO3, APOE, FDFT1, FADS2, GSTM4, ABCD3, RANBP2, PSAT1, PLOD2, COQ9, PLOD3	5351, 2752, 55902, 4831, 139596, 7378, 2744, 6507, 26227, 2027, 348, 2222, 9415, 2948, 5825, 5903, 29968, 5352, 57017, 8985
Rho protein signal transduction	GO:0007266	0.000684299	9	2.38566	203	CDC42EP4, KALRN, ITGB1, COL3A1, APOE, COL1A2, RIPOR1, ARHGEF2, ARHGEF12	23580, 8997, 3688, 1281, 348, 1278, 79567, 9181, 23365
response to corticosteroid	GO:0031960	0.000728434	8	1.92733	164	CASP3, AIF1, BCHE, IGFBP7, GSTP1, ICAM1, SPARC, ATP2B1	836, 199, 590, 3490, 2950, 3383, 6678, 490
cellular response to osmotic stress	GO:0071470	0.00072995	4	0.411321	35	CASP3, TSPO, ARHGEF2, PKD2	836, 706, 9181, 5311
negative regulation of cell death	GO:0060548	0.000733737	24	11.7638	1001	CASP3, FAM129B, PRNP, COL2A1, NME2, SON, AIF1, ITGB1, NCOA7, THBS1, FBXO7, APOE, FHL2, PTTG1IP, FCER1G, CAST, SFRP2, HSP90AB1, GSTP1, ICAM1, ARHGEF2, CTSH, ITGA5, DHRS2	836, 64855, 5621, 1280, 4831, 6651, 199, 3688, 135112, 7057, 25793, 348, 2274, 754, 2207, 831, 6423, 3326, 2950, 3383, 9181, 1512, 3678, 10202
cell-substrate adhesion	GO:0031589	0.000739887	12	4.00744	341	ITGA8, ITGAL, ITGB1, VCAM1, FN1, COL3A1, THBS1, LIMCH1, ANTXR1, COL16A1, JAG1, ITGA5	8516, 3683, 3688, 7412, 2335, 1281, 7057, 22998, 84168, 1307, 182, 3678
regulation of neurotransmitter levels	GO:0001505	0.000778532	12	4.03094	343	GLUL, CYP1B1, PNKD, AIF1, SLC1A3, PHGDH, BCHE, TSPO, HSP90AB1, ICAM1, PKD2, SLC30A1	2752, 1545, 25953, 199, 6507, 26227, 590, 706, 3326, 3383, 5311, 7779
rRNA processing	GO:0006364	0.000786303	9	2.43267	207	EBNA1BP2, RRS1, MRTO4, WBP11, RSL1D1, WDR3, RRP9, NPM3, THUMPD1	10969, 23212, 51154, 51729, 26156, 10885, 9136, 10360, 55623
cardiac chamber development	GO:0003205	0.000788443	8	1.95084	166	LTBP1, TPM1, FHL2, COL11A1, JAG1, SFRP2, PTK7, PLXND1	4052, 7168, 2274, 1301, 182, 6423, 5754, 23129
response to peptide	GO:1901652	0.000790954	15	5.81725	495	TSC2, PRNP, NME2, UPRT, PRKACB, RPL23, SRSF5, JAG1, SORT1, GSTP1, ICAM1, SPARC, ARHGEF2, RAB8B, ATP1A3	7249, 5621, 4831, 139596, 5567, 9349, 6430, 182, 6272, 2950, 3383, 6678, 9181, 51762, 478
platelet degranulation	GO:0002576	0.000799236	7	1.50426	128	FN1, THBS1, FCER1G, APLP2, ITIH3, CHID1, SPARC	2335, 7057, 2207, 334, 3699, 66005, 6678
regulation of nitric oxide biosynthetic process	GO:0045428	0.00080394	5	0.728625	62	AIF1, TSPO, HSP90AB1, ICAM1, PKD2	199, 706, 3326, 3383, 5311
MHC class II protein complex assembly	GO:0002399	0.000812132	2	0.0470081	4	HLA-DRA, HLA-DRB1	3122, 3123
regulation of collagen catabolic process	GO:0010710	0.000812132	2	0.0470081	4	ITGB1, CST3	3688, 1471
calcium-independent cell-matrix adhesion	GO:0007161	0.000812132	2	0.0470081	4	ITGB1, FN1	3688, 2335
positive regulation of RNA splicing	GO:0033120	0.000813849	4	0.423073	36	RBM3, TRA2A, SRSF5, RBM22	5935, 29896, 6430, 55696
regulation of body fluid levels	GO:0050878	0.000840757	15	5.85251	498	MYL9, PABPC4, F3, UPRT, PRKACB, KALRN, COL3A1, THBS1, APOE, ANO6, COL1A2, FCER1G, DGKA, ANXA8, CSRP1	10398, 8761, 2152, 139596, 5567, 8997, 1281, 7057, 348, 196527, 1278, 2207, 1606, 653145, 1465
artery development	GO:0060840	0.000847424	6	1.10469	94	LTBP1, COL3A1, APOE, JAG1, PLXND1, PKD2	4052, 1281, 348, 182, 23129, 5311
macromolecule glycosylation	GO:0043413	0.00087508	10	2.98501	254	PLOD1, POFUT2, MAN2A2, STT3A, B3GAT3, KDELC2, FUT8, OSTC, PLOD2, PLOD3	5351, 23275, 4122, 3703, 26229, 143888, 2530, 58505, 5352, 8985
protein glycosylation	GO:0006486	0.00087508	10	2.98501	254	PLOD1, POFUT2, MAN2A2, STT3A, B3GAT3, KDELC2, FUT8, OSTC, PLOD2, PLOD3	5351, 23275, 4122, 3703, 26229, 143888, 2530, 58505, 5352, 8985
cell-substrate junction assembly	GO:0007044	0.000895828	6	1.11644	95	TNS1, FN1, THBS1, LIMCH1, COL16A1, ITGA5	7145, 2335, 7057, 22998, 1307, 3678
ear development	GO:0043583	0.000930894	9	2.49143	212	ITGA8, COL2A1, COL11A1, C1QB, JAG1, RPL38, PTK7, CTHRC1, SPARC	8516, 1280, 1301, 713, 182, 6169, 5754, 115908, 6678
negative regulation of apoptotic process	GO:0043066	0.000955324	22	10.5768	900	CASP3, FAM129B, PRNP, COL2A1, NME2, SON, AIF1, ITGB1, THBS1, APOE, FHL2, PTTG1IP, FCER1G, CAST, SFRP2, HSP90AB1, GSTP1, ICAM1, ARHGEF2, CTSH, ITGA5, DHRS2	836, 64855, 5621, 1280, 4831, 6651, 199, 3688, 7057, 348, 2274, 754, 2207, 831, 6423, 3326, 2950, 3383, 9181, 1512, 3678, 10202
exocytosis	GO:0006887	0.000955324	22	10.5768	900	HMOX2, NME2, ITGAL, IDH1, VPS4A, FN1, THBS1, IGF2R, ANO6, FCER1G, SDF4, APLP2, ITIH3, HSP90AB1, UBR4, CHID1, GSTP1, COMMD9, SPARC, CST3, CTSH, RAB8B	3163, 4831, 3683, 3417, 27183, 2335, 7057, 3482, 196527, 2207, 51150, 334, 3699, 3326, 23352, 66005, 2950, 29099, 6678, 1471, 1512, 51762
establishment of planar polarity of embryonic epithelium	GO:0042249	0.000963834	3	0.199784	17	SFRP2, PTK7, CTHRC1	6423, 5754, 115908
acute inflammatory response	GO:0002526	0.000994463	9	2.51493	214	F3, VCAM1, FN1, ANO6, FCER1G, C4A, C1QB, GSTP1, ICAM1	2152, 7412, 2335, 196527, 2207, 720, 713, 2950, 3383
regulation of multicellular organismal process	GO:0051239	0.0010129	55	36.7133	3124	MYL9, LTBP1, FAM129B, LMCD1, SIRT2, GLUL, PRNP, F3, STIM1, NME2, POFUT2, PRKACB, CYP1B1, KALRN, LUC7L, GLS, AIF1, ITGB1, TPM1, FN1, SDC2, COL3A1, THBS1, SPP1, TSPO, FBXO7, APOE, CNOT4, ANO6, FCER1G, JAG1, COL5A1, GPC1, MAPRE2, COL5A2, GJA1, SFRP2, HSP90AB1, ASPH, OTUD7B, PTK7, PLXND1, CHID1, CTHRC1, GSTP1, ICAM1, SPARC, CST3, ARHGEF2, CTSH, ATP2B1, RAB8B, GPC4, ITGA5, ATP1A3	10398, 4052, 64855, 29995, 22933, 2752, 5621, 2152, 6786, 4831, 23275, 5567, 1545, 8997, 55692, 2744, 199, 3688, 7168, 2335, 6383, 1281, 7057, 6696, 706, 25793, 348, 4850, 196527, 2207, 182, 1289, 2817, 10982, 1290, 2697, 6423, 3326, 444, 56957, 5754, 23129, 66005, 115908, 2950, 3383, 6678, 1471, 9181, 1512, 490, 51762, 2239, 3678, 478
protein import	GO:0017038	0.00102754	9	2.52668	215	TSC2, KPNA2, RPL23, APOE, PTTG1IP, HSP90AB1, RANBP2, RBM22, RAB8B	7249, 3838, 9349, 348, 754, 3326, 5903, 55696, 51762
drug metabolic process	GO:0017144	0.0010391	20	9.26059	788	ACSS2, CYP1B1, PNKD, IDH1, AIF1, PHGDH, BCHE, TSPO, ENO3, NDUFA12, FADS2, HSP90AB1, ICAM1, NDUFB4, CTSH, PSAT1, COQ9, PKD2, ND4, SAT2	55902, 1545, 25953, 3417, 199, 26227, 590, 706, 2027, 55967, 9415, 3326, 3383, 4710, 1512, 29968, 57017, 5311, 4538, 112483
regulation of biological quality	GO:0065008	0.00105296	66	46.3265	3942	MYL9, CASP3, LTBP1, FAM129B, HMOX2, GLUL, PABPC4, CDC42EP4, PRNP, F3, STIM1, COL2A1, NME2, UPRT, TGM2, PRKACB, CYP1B1, GNL3, KALRN, PNKD, AIF1, TPM1, FN1, PNKP, SLC1A3, PHGDH, COL3A1, THBS1, SPP1, RPL23, BCHE, TSPO, FBXO7, APOE, YBX1, ANO6, MPP2, COL1A2, FCER1G, DGKA, TNKS1BP1, FLNB, HNRNPA2B1, GJA1, HSP90AB1, ANXA8, ASPH, NCK2, RCN3, SYNE1, PLXND1, FBLIM1, GSTP1, ICAM1, COMMD9, SPARC, CTSH, ATP2…	10398, 836, 4052, 64855, 3163, 2752, 8761, 23580, 5621, 2152, 6786, 1280, 4831, 139596, 7052, 5567, 1545, 26354, 8997, 25953, 199, 7168, 2335, 11284, 6507, 26227, 1281, 7057, 6696, 9349, 590, 706, 25793, 348, 4904, 196527, 4355, 1278, 2207, 1606, 85456, 2317, 3181, 2697, 3326, 653145, 444, 8440, 57333, 23345, 23129, 54751, 2950, 3383, 29099, 6678, 1512, 490, 1465, 51762, 2239, 10202, 5311, 7779, …
regulated exocytosis	GO:0045055	0.00105515	20	9.27235	789	HMOX2, NME2, ITGAL, IDH1, FN1, THBS1, IGF2R, ANO6, FCER1G, SDF4, APLP2, ITIH3, HSP90AB1, UBR4, CHID1, GSTP1, COMMD9, SPARC, CST3, CTSH	3163, 4831, 3683, 3417, 2335, 7057, 3482, 196527, 2207, 51150, 334, 3699, 3326, 23352, 66005, 2950, 29099, 6678, 1471, 1512
import into cell	GO:0098657	0.00111736	22	10.7061	911	TSC2, GLUL, PRNP, TGM2, ITGAL, AIF1, ITGB1, SLC1A3, THBS1, APOE, IGF2R, ANO6, FCER1G, C4A, HSP90AB1, SORT1, M6PR, SPARC, PLD4, SLC1A5, SLC30A1, ATP1A3	7249, 2752, 5621, 7052, 3683, 199, 3688, 6507, 7057, 348, 3482, 196527, 2207, 720, 3326, 6272, 4074, 6678, 122618, 6510, 7779, 478
protein localization to organelle	GO:0033365	0.00113318	22	10.7178	912	TSC2, GNL3, IDH1, KPNA2, VPS4A, RRS1, RPL23, TSPO, FBXO7, YBX1, PTTG1IP, RIPOR1, MAPRE2, HSP90AB1, RPL38, RANBP2, OTUD7B, SYNE1, M6PR, RBM22, RAB8B, GPC4	7249, 26354, 3417, 3838, 27183, 23212, 9349, 706, 25793, 4904, 754, 79567, 10982, 3326, 6169, 5903, 56957, 23345, 4074, 55696, 51762, 2239
glycosylation	GO:0070085	0.00113884	10	3.09078	263	PLOD1, POFUT2, MAN2A2, STT3A, B3GAT3, KDELC2, FUT8, OSTC, PLOD2, PLOD3	5351, 23275, 4122, 3703, 26229, 143888, 2530, 58505, 5352, 8985
glutamine family amino acid biosynthetic process	GO:0009084	0.00114661	3	0.211536	18	GLUL, GLS, SLC1A3	2752, 2744, 6507
negative regulation of proteolysis	GO:0045861	0.00115289	12	4.21898	359	PRNP, PZP, THBS1, RPL23, C4A, CAST, APLP2, ITIH3, SFRP2, HSP90AB1, ANXA8, CST3	5621, 5858, 7057, 9349, 720, 831, 334, 3699, 6423, 3326, 653145, 1471
regulation of cell migration	GO:0030334	0.00116541	22	10.7413	914	GLUL, F3, CYP1B1, AIF1, TPM1, FN1, COL3A1, THBS1, APOE, LIMCH1, ANO6, RIPOR1, JAG1, MAPRE2, SFRP2, PLXND1, GSTP1, ICAM1, SPARC, ARHGEF2, CTSH, ITGA5	2752, 2152, 1545, 199, 7168, 2335, 1281, 7057, 348, 22998, 196527, 79567, 182, 10982, 6423, 23129, 2950, 3383, 6678, 9181, 1512, 3678
negative regulation of programmed cell death	GO:0043069	0.00118181	22	10.7531	915	CASP3, FAM129B, PRNP, COL2A1, NME2, SON, AIF1, ITGB1, THBS1, APOE, FHL2, PTTG1IP, FCER1G, CAST, SFRP2, HSP90AB1, GSTP1, ICAM1, ARHGEF2, CTSH, ITGA5, DHRS2	836, 64855, 5621, 1280, 4831, 6651, 199, 3688, 7057, 348, 2274, 754, 2207, 831, 6423, 3326, 2950, 3383, 9181, 1512, 3678, 10202
response to extracellular stimulus	GO:0009991	0.00122215	15	6.0758	517	SIRT2, GLUL, UPP1, AIF1, VCAM1, SPP1, BCHE, TSPO, APOE, RIPOR1, SFRP2, GSTP1, ICAM1, SPARC, ATP2B1	22933, 2752, 7378, 199, 7412, 6696, 590, 706, 348, 79567, 6423, 2950, 3383, 6678, 490
response to organic cyclic compound	GO:0014070	0.00123224	22	10.7884	918	CASP3, SIRT2, PRKACB, CYP1B1, IDH1, AIF1, THBS1, SPP1, BCHE, TSPO, EPHX1, FHL2, IGFBP7, PLPP1, ABCD3, HSP90AB1, GSTP1, ICAM1, SPARC, ATP2B1, PKD2, ATP1A3	836, 22933, 5567, 1545, 3417, 199, 7057, 6696, 590, 706, 2052, 2274, 3490, 8611, 5825, 3326, 2950, 3383, 6678, 490, 5311, 478
cellular response to interferon-gamma	GO:0071346	0.00123744	8	2.09186	178	CDC42EP4, AIF1, VCAM1, HLA-DRA, FLNB, HSP90AB1, ICAM1, HLA-DRB1	23580, 199, 7412, 3122, 2317, 3326, 3383, 3123
adherens junction organization	GO:0034332	0.00129458	7	1.63353	139	CDH6, CADM3, THBS1, LIMCH1, COL16A1, MAPRE2, RAB8B	1004, 57863, 7057, 22998, 1307, 10982, 51762
regulation of endopeptidase activity	GO:0052548	0.00130609	13	4.87709	415	CASP3, F3, PZP, THBS1, C4A, CAST, APLP2, ITIH3, SFRP2, ANXA8, ASPH, CST3, CTSH	836, 2152, 5858, 7057, 720, 831, 334, 3699, 6423, 653145, 444, 1471, 1512
movement of cell or subcellular component	GO:0006928	0.00132991	41	25.4314	2164	FAM129B, GLUL, F3, CYP1B1, ITGAL, TNS1, AIF1, ITGB1, VCAM1, TPM1, FN1, SDC2, COL3A1, THBS1, TSPO, APOE, LIMCH1, ANO6, COL1A2, FCER1G, RIPOR1, PLPP1, JAG1, COL5A1, GPC1, MAPRE2, GJA1, SFRP2, PTK7, NCK2, PLXND1, CTHRC1, GSTP1, ICAM1, SPARC, FUT8, ARHGEF2, CTSH, LYPLA2, TPM2, ITGA5	64855, 2752, 2152, 1545, 3683, 7145, 199, 3688, 7412, 7168, 2335, 6383, 1281, 7057, 706, 348, 22998, 196527, 1278, 2207, 79567, 8611, 182, 1289, 2817, 10982, 2697, 6423, 5754, 8440, 23129, 115908, 2950, 3383, 6678, 2530, 9181, 1512, 11313, 7169, 3678
carboxylic acid biosynthetic process	GO:0046394	0.00133449	13	4.88884	416	PLOD1, GLUL, ACSS2, GLS, SLC1A3, PHGDH, ENO3, FADS2, GSTM4, ABCD3, PSAT1, PLOD2, PLOD3	5351, 2752, 55902, 2744, 6507, 26227, 2027, 9415, 2948, 5825, 29968, 5352, 8985
membrane to membrane docking	GO:0022614	0.001343	2	0.0587601	5	VCAM1, ICAM1	7412, 3383
regulation of endodermal cell differentiation	GO:1903224	0.001343	2	0.0587601	5	COL5A1, COL5A2	1289, 1290
negative regulation of smooth muscle cell chemotaxis	GO:0071672	0.001343	2	0.0587601	5	AIF1, GSTP1	199, 2950
response to L-ascorbic acid	GO:0033591	0.001343	2	0.0587601	5	GSTP1, SPARC	2950, 6678
gamma-aminobutyric acid metabolic process	GO:0009448	0.001343	2	0.0587601	5	SLC1A3, PHGDH	6507, 26227
oxidation-reduction process	GO:0055114	0.0013445	23	11.5757	985	PLOD1, HMOX2, ACSS2, CYP1B1, IDH1, VCAM1, PHGDH, SELENBP1, ENO3, NDUFA12, FADS2, CYB5A, PTGR2, ABCD3, HIBCH, ASPH, NDUFB4, PLOD2, DHRS2, COQ9, ND4, PLOD3, IVD	5351, 3163, 55902, 1545, 3417, 7412, 26227, 8991, 2027, 55967, 9415, 1528, 145482, 5825, 26275, 444, 4710, 5352, 10202, 57017, 4538, 8985, 3712
organic acid biosynthetic process	GO:0016053	0.00136342	13	4.90059	417	PLOD1, GLUL, ACSS2, GLS, SLC1A3, PHGDH, ENO3, FADS2, GSTM4, ABCD3, PSAT1, PLOD2, PLOD3	5351, 2752, 55902, 2744, 6507, 26227, 2027, 9415, 2948, 5825, 29968, 5352, 8985
regulation of locomotion	GO:0040012	0.00140888	24	12.3396	1050	GLUL, F3, CYP1B1, AIF1, VPS4A, TPM1, FN1, COL3A1, THBS1, FBXO7, APOE, LIMCH1, ANO6, RIPOR1, JAG1, MAPRE2, SFRP2, PLXND1, GSTP1, ICAM1, SPARC, ARHGEF2, CTSH, ITGA5	2752, 2152, 1545, 199, 27183, 7168, 2335, 1281, 7057, 25793, 348, 22998, 196527, 79567, 182, 10982, 6423, 23129, 2950, 3383, 6678, 9181, 1512, 3678
protein localization to nucleus	GO:0034504	0.00142479	10	3.1848	271	TSC2, KPNA2, RRS1, RPL23, PTTG1IP, HSP90AB1, RANBP2, OTUD7B, SYNE1, RBM22	7249, 3838, 23212, 9349, 754, 3326, 5903, 56957, 23345, 55696
cellular component morphogenesis	GO:0032989	0.00142496	25	13.08	1113	CASP3, ITGA8, FAM129B, CDH6, CDC42EP4, KALRN, COL12A1, ITGB1, TPM1, FN1, SDC2, SLC1A3, SPP1, APOE, ANTXR1, FLNB, GPC1, HSP90AB1, PLXND1, FBLIM1, ICAM1, SPARC, ARHGEF2, LYPLA2, PLOD3	836, 8516, 64855, 1004, 23580, 8997, 1303, 3688, 7168, 2335, 6383, 6507, 6696, 348, 84168, 2317, 2817, 3326, 23129, 54751, 3383, 6678, 9181, 11313, 8985
negative regulation of extrinsic apoptotic signaling pathway	GO:2001237	0.0014335	6	1.22221	104	COL2A1, THBS1, SFRP2, GSTP1, ICAM1, ARHGEF2	1280, 7057, 6423, 2950, 3383, 9181
positive regulation of nitric oxide metabolic process	GO:1904407	0.00146375	4	0.493585	42	AIF1, HSP90AB1, ICAM1, PKD2	199, 3326, 3383, 5311
positive regulation of nitric oxide biosynthetic process	GO:0045429	0.00146375	4	0.493585	42	AIF1, HSP90AB1, ICAM1, PKD2	199, 3326, 3383, 5311
ribonucleoprotein complex assembly	GO:0022618	0.00150472	10	3.2083	273	EDC3, SF3A1, LUC7L, RRS1, SF1, SRSF5, EIF4H, HSP90AB1, RPL38, RBM22	80153, 10291, 55692, 23212, 7536, 6430, 7458, 3326, 6169, 55696
lipid catabolic process	GO:0016042	0.0015476	11	3.78415	322	SIRT2, CYP1B1, IDH1, SPP1, APOE, ABCD3, HIBCH, PAFAH1B3, PLD4, ACBD5, IVD	22933, 1545, 3417, 6696, 348, 5825, 26275, 5050, 122618, 91452, 3712
inner ear development	GO:0048839	0.00158116	8	2.17412	185	ITGA8, COL2A1, COL11A1, C1QB, JAG1, PTK7, CTHRC1, SPARC	8516, 1280, 1301, 713, 182, 5754, 115908, 6678
RNA splicing, via transesterification reactions with bulged adenosine as nucleophile	GO:0000377	0.00162918	12	4.39526	374	SF3A1, LUC7L, SON, YBX1, RBM3, SF1, TRA2A, SRSF5, POLR2E, WBP11, HNRNPA2B1, RBM22	10291, 55692, 6651, 4904, 5935, 7536, 29896, 6430, 5434, 51729, 3181, 55696
mRNA splicing, via spliceosome	GO:0000398	0.00162918	12	4.39526	374	SF3A1, LUC7L, SON, YBX1, RBM3, SF1, TRA2A, SRSF5, POLR2E, WBP11, HNRNPA2B1, RBM22	10291, 55692, 6651, 4904, 5935, 7536, 29896, 6430, 5434, 51729, 3181, 55696
negative regulation of cellular process	GO:0048523	0.0016654	76	56.1277	4776	CASP3, LTBP1, TSC2, FAM129B, LMCD1, SIRT2, PRNP, COL2A1, NME2, PRKACB, CYP1B1, KALRN, PNKD, SON, PZP, AIF1, ITGB1, NCOA7, VPS4A, TPM1, FN1, PNKP, COL3A1, THBS1, SPP1, RPL23, BCHE, TSPO, FBXO7, APOE, YBX1, LIMCH1, RBM3, CNOT4, SF1, FHL2, PTTG1IP, ANTXR1, FCER1G, UBP1, C4A, CAST, TNKS1BP1, IGFBP7, HNRNPA2B1, PLPP1, APLP2, JAG1, ITIH3, COL5A1, GPC1, COL5A2, GJA1, SFRP2, HSP90AB1, ANXA8, NCL, ASPH, O…	836, 4052, 7249, 64855, 29995, 22933, 5621, 1280, 4831, 5567, 1545, 8997, 25953, 6651, 5858, 199, 3688, 135112, 27183, 7168, 2335, 11284, 1281, 7057, 6696, 9349, 590, 706, 25793, 348, 4904, 22998, 5935, 4850, 7536, 2274, 754, 84168, 2207, 7342, 720, 831, 85456, 3490, 3181, 8611, 334, 182, 3699, 1289, 2817, 1290, 2697, 6423, 3326, 653145, 4691, 444, 56957, 8440, 23129, 9521, 115908, 55466, 6272, 2…
nervous system development	GO:0007399	0.00167247	43	27.3822	2330	CASP3, TSC2, ITGA8, FAM129B, SIRT2, COL2A1, NME2, PRKACB, WLS, KALRN, AIF1, ITGB1, VCAM1, FN1, SDC2, SLC1A3, PHGDH, COL3A1, SPP1, BCHE, TSPO, FBXO7, APOE, SDF4, JAG1, TRAPPC4, GPC1, SFRP2, HSP90AB1, PAFAH1B3, PTK7, NCK2, PLXND1, CTHRC1, GSTP1, ARHGEF2, ATP2B1, LYPLA2, GLDN, GPC4, PKD2, ND4, PLOD3	836, 7249, 8516, 64855, 22933, 1280, 4831, 5567, 79971, 8997, 199, 3688, 7412, 2335, 6383, 6507, 26227, 1281, 6696, 590, 706, 25793, 348, 51150, 182, 51399, 2817, 6423, 3326, 5050, 5754, 8440, 23129, 115908, 2950, 9181, 490, 11313, 342035, 2239, 5311, 4538, 8985
positive regulation of peptidase activity	GO:0010952	0.00169211	8	2.19763	187	CASP3, F3, FN1, ANTXR1, SFRP2, ASPH, RCN3, CTSH	836, 2152, 2335, 84168, 6423, 444, 57333, 1512
nitrogen compound metabolic process	GO:0006807	0.00169567	147	125.5	10679	CASP3, LTBP1, TSC2, ITGA8, FAM129B, LMCD1, PLOD1, EBNA1BP2, LACTB2, SIRT2, HMOX2, GLUL, PABPC4, PRNP, F3, EDC3, ACSS2, COL2A1, NME2, UPRT, TGM2, POFUT2, PRKACB, CYP1B1, SF3A1, UPP1, GNL3, KALRN, GRWD1, PNKD, IDH1, LUC7L, SON, MAN2A2, GLS, PZP, STT3A, AIF1, NCOA7, KPNA2, VCAM1, VPS4A, RRS1, BLMH, MRTO4, FN1, B3GAT3, SDC2, PNKP, SLC1A3, PHGDH, COL3A1, RABGGTA, THBS1, SPP1, RPL23, BCHE, TSPO, FBXO7,…	836, 4052, 7249, 8516, 64855, 29995, 5351, 10969, 51110, 22933, 3163, 2752, 8761, 5621, 2152, 80153, 55902, 1280, 4831, 139596, 7052, 23275, 5567, 1545, 10291, 7378, 26354, 8997, 83743, 25953, 3417, 55692, 6651, 4122, 2744, 5858, 3703, 199, 135112, 3838, 7412, 27183, 23212, 642, 51154, 2335, 26229, 6383, 11284, 6507, 26227, 1281, 5875, 7057, 6696, 9349, 590, 706, 25793, 2027, 348, 4904, 22998, 59…
terpenoid metabolic process	GO:0006721	0.00173918	6	1.26922	108	CYP1B1, SDC2, APOE, FDFT1, GPC1, GPC4	1545, 6383, 348, 2222, 2817, 2239
RNA splicing, via transesterification reactions	GO:0000375	0.00174161	12	4.43051	377	SF3A1, LUC7L, SON, YBX1, RBM3, SF1, TRA2A, SRSF5, POLR2E, WBP11, HNRNPA2B1, RBM22	10291, 55692, 6651, 4904, 5935, 7536, 29896, 6430, 5434, 51729, 3181, 55696
morphogenesis of an epithelium	GO:0002009	0.00178424	14	5.67623	483	TSC2, TGM2, PRKACB, JAG1, COL5A1, SFRP2, PTK7, PLXND1, CTHRC1, CTSH, GPC4, ITGA5, PKD2, PLOD3	7249, 7052, 5567, 182, 1289, 6423, 5754, 23129, 115908, 1512, 2239, 3678, 5311, 8985
mesoderm formation	GO:0001707	0.00178628	5	0.86965	74	ITGA8, POFUT2, WLS, ITGB1, SFRP2	8516, 23275, 79971, 3688, 6423
cell-cell adhesion	GO:0098609	0.00179351	20	9.69542	825	MYL9, CASP3, ITGA8, CDH6, PRNP, CADM3, CYP1B1, ITGAL, AIF1, ITGB1, VCAM1, PDLIM1, JAG1, NCK2, FBLIM1, ICAM1, GLDN, CSRP1, GPC4, ITGA5	10398, 836, 8516, 1004, 5621, 57863, 1545, 3683, 199, 3688, 7412, 9124, 182, 8440, 54751, 3383, 342035, 1465, 2239, 3678
angiogenesis	GO:0001525	0.00181792	16	6.9807	594	FAM129B, GLUL, F3, STIM1, CYP1B1, ITGB1, FN1, THBS1, UBP1, JAG1, SFRP2, NCL, PLXND1, SPARC, CTSH, ITGA5	64855, 2752, 2152, 6786, 1545, 3688, 2335, 7057, 7342, 182, 6423, 4691, 23129, 6678, 1512, 3678
regulation of amyloid-beta formation	GO:1902003	0.00182092	3	0.246792	21	CASP3, PRNP, APOE	836, 5621, 348
smooth muscle tissue development	GO:0048745	0.00182092	3	0.246792	21	ITGA8, COL3A1, PKD2	8516, 1281, 5311
response to nutrient levels	GO:0031667	0.00185359	14	5.69973	485	SIRT2, GLUL, UPP1, VCAM1, SPP1, BCHE, TSPO, APOE, RIPOR1, SFRP2, GSTP1, ICAM1, SPARC, ATP2B1	22933, 2752, 7378, 7412, 6696, 590, 706, 348, 79567, 6423, 2950, 3383, 6678, 490
small molecule catabolic process	GO:0044282	0.0018638	13	5.07687	432	GLUL, UPP1, PNKD, GLS, BLMH, ENO3, APOE, ABCD3, HIBCH, ABHD10, FUT8, ACBD5, IVD	2752, 7378, 25953, 2744, 642, 2027, 348, 5825, 26275, 55347, 2530, 91452, 3712
cellular protein metabolic process	GO:0044267	0.00193642	81	61.0047	5191	CASP3, LTBP1, TSC2, LMCD1, PLOD1, SIRT2, GLUL, PABPC4, PRNP, F3, NME2, TGM2, POFUT2, PRKACB, GNL3, KALRN, MAN2A2, PZP, STT3A, AIF1, NCOA7, VPS4A, BLMH, FN1, B3GAT3, SDC2, PNKP, COL3A1, RABGGTA, THBS1, SPP1, RPL23, TSPO, FBXO7, APOE, LIMCH1, RBM3, CNOT4, FKBP10, PTTG1IP, EIF4H, ANTXR1, GFM1, FN3KRP, C4A, CAST, TNKS1BP1, IGFBP7, PLPP1, APLP2, ITIH3, MINPP1, SFRP2, HSP90AB1, ANXA8, RPL38, NCL, ASPH,…	836, 4052, 7249, 29995, 5351, 22933, 2752, 8761, 5621, 2152, 4831, 7052, 23275, 5567, 26354, 8997, 4122, 5858, 3703, 199, 135112, 27183, 642, 2335, 26229, 6383, 11284, 1281, 5875, 7057, 6696, 9349, 706, 25793, 348, 22998, 5935, 4850, 60681, 754, 7458, 84168, 85476, 79672, 720, 831, 85456, 3490, 8611, 334, 3699, 9562, 6423, 3326, 653145, 6169, 4691, 444, 23352, 5903, 56957, 5754, 8440, 57333, 9521…
glutamate biosynthetic process	GO:0006537	0.00199877	2	0.0705121	6	GLS, SLC1A3	2744, 6507
MHC protein complex assembly	GO:0002396	0.00199877	2	0.0705121	6	HLA-DRA, HLA-DRB1	3122, 3123
mRNA 3'-splice site recognition	GO:0000389	0.00199877	2	0.0705121	6	SF3A1, SF1	10291, 7536
mesoderm morphogenesis	GO:0048332	0.00201027	5	0.893154	76	ITGA8, POFUT2, WLS, ITGB1, SFRP2	8516, 23275, 79971, 3688, 6423
chordate embryonic development	GO:0043009	0.00204513	16	7.06296	601	TSC2, COL2A1, PRKACB, ITGB1, TPM1, PHGDH, COL11A1, TM4SF1, SFRP2, PTK7, CTHRC1, FUT8, PKD2, ND4, SLC30A1, PLOD3	7249, 1280, 5567, 3688, 7168, 26227, 1301, 4071, 6423, 5754, 115908, 2530, 5311, 4538, 7779, 8985
viral process	GO:0016032	0.00204774	18	8.41445	716	TSC2, NUP210, ITGB1, KPNA2, VPS4A, HLA-DRA, APOE, EIF4H, POLR2E, UBP1, HSP90AB1, UBR4, RANBP2, SLC20A2, ICAM1, COPS7B, ITGA5, SLC1A5	7249, 23225, 3688, 3838, 27183, 3122, 348, 7458, 5434, 7342, 3326, 23352, 5903, 6575, 3383, 64708, 3678, 6510
cell junction assembly	GO:0034329	0.00207061	9	2.79698	238	CDH6, TNS1, FN1, THBS1, LIMCH1, COL16A1, GJA1, FBLIM1, ITGA5	1004, 7145, 2335, 7057, 22998, 1307, 2697, 54751, 3678
cell projection organization	GO:0030030	0.00208493	31	18.0276	1534	CASP3, ITGA8, FAM129B, CDC42EP4, PRNP, NME2, KALRN, AIF1, ITGB1, TPM1, FN1, SDC2, PHGDH, SPP1, TSPO, FBXO7, APOE, ANO6, TRAPPC4, GPC1, SFRP2, HSP90AB1, PTK7, NCK2, PLXND1, CTHRC1, ICAM1, LYPLA2, GLDN, RAB8B, ATP1A3	836, 8516, 64855, 23580, 5621, 4831, 8997, 199, 3688, 7168, 2335, 6383, 26227, 6696, 706, 25793, 348, 196527, 51399, 2817, 6423, 3326, 5754, 8440, 23129, 115908, 3383, 11313, 342035, 51762, 478
integrin activation	GO:0033622	0.00209026	3	0.258544	22	FN1, COL16A1, FBLIM1	2335, 1307, 54751
pyrimidine ribonucleoside biosynthetic process	GO:0046132	0.00209026	3	0.258544	22	NME2, UPRT, UPP1	4831, 139596, 7378
glutathione derivative biosynthetic process	GO:1901687	0.00209026	3	0.258544	22	GSTM4, GSTT1, GSTP1	2948, 2952, 2950
glutathione derivative metabolic process	GO:1901685	0.00209026	3	0.258544	22	GSTM4, GSTT1, GSTP1	2948, 2952, 2950
aspartate family amino acid biosynthetic process	GO:0009067	0.00209026	3	0.258544	22	PLOD1, PLOD2, PLOD3	5351, 5352, 8985
muscle structure development	GO:0061061	0.00211134	17	7.75633	660	CASP3, ITGA8, FAM129B, SIRT2, LUC7L, ITGB1, TPM1, FHL3, COL3A1, FHL2, COL11A1, FLNB, JAG1, GPC1, SYNE1, SORT1, MYOF	836, 8516, 64855, 22933, 55692, 3688, 7168, 2275, 1281, 2274, 1301, 2317, 182, 2817, 23345, 6272, 26509
regulation of blood coagulation	GO:0030193	0.00212965	5	0.904906	77	F3, THBS1, APOE, ANO6, FCER1G	2152, 7057, 348, 196527, 2207
ribosome biogenesis	GO:0042254	0.00217232	10	3.37283	287	EBNA1BP2, RRS1, MRTO4, WBP11, RSL1D1, WDR3, RRP9, NPM3, RPL38, THUMPD1	10969, 23212, 51154, 51729, 26156, 10885, 9136, 10360, 6169, 55623
ribonucleoprotein complex subunit organization	GO:0071826	0.00217232	10	3.37283	287	EDC3, SF3A1, LUC7L, RRS1, SF1, SRSF5, EIF4H, HSP90AB1, RPL38, RBM22	80153, 10291, 55692, 23212, 7536, 6430, 7458, 3326, 6169, 55696
symbiont process	GO:0044403	0.00220644	19	9.16658	780	TSC2, NUP210, ITGB1, KPNA2, VPS4A, HLA-DRA, FN1, APOE, EIF4H, POLR2E, UBP1, HSP90AB1, UBR4, RANBP2, SLC20A2, ICAM1, COPS7B, ITGA5, SLC1A5	7249, 23225, 3688, 3838, 27183, 3122, 2335, 348, 7458, 5434, 7342, 3326, 23352, 5903, 6575, 3383, 64708, 3678, 6510
regulation of angiogenesis	GO:0045765	0.00220992	12	4.55978	388	FAM129B, GLUL, F3, STIM1, CYP1B1, ITGB1, THBS1, SFRP2, PLXND1, SPARC, CTSH, ITGA5	64855, 2752, 2152, 6786, 1545, 3688, 7057, 6423, 23129, 6678, 1512, 3678
carbohydrate derivative biosynthetic process	GO:1901137	0.00224072	18	8.48496	722	PLOD1, ACSS2, NME2, UPRT, POFUT2, UPP1, MAN2A2, STT3A, B3GAT3, SDC2, ENO3, GPC1, KDELC2, FUT8, OSTC, GPC4, PLOD2, PLOD3	5351, 55902, 4831, 139596, 23275, 7378, 4122, 3703, 26229, 6383, 2027, 2817, 143888, 2530, 58505, 2239, 5352, 8985
regulation of hemostasis	GO:1900046	0.00225411	5	0.916658	78	F3, THBS1, APOE, ANO6, FCER1G	2152, 7057, 348, 196527, 2207
transforming growth factor beta receptor signaling pathway	GO:0007179	0.0022699	8	2.3034	196	LTBP1, ITGA8, ITGB1, COL3A1, THBS1, COL1A2, HSP90AB1, FUT8	4052, 8516, 3688, 1281, 7057, 1278, 3326, 2530
cell morphogenesis involved in differentiation	GO:0000904	0.00227433	18	8.49671	723	CASP3, ITGA8, FAM129B, KALRN, COL12A1, ITGB1, FN1, SDC2, SLC1A3, SPP1, APOE, ANTXR1, FLNB, GPC1, HSP90AB1, PLXND1, LYPLA2, PLOD3	836, 8516, 64855, 8997, 1303, 3688, 2335, 6383, 6507, 6696, 348, 84168, 2317, 2817, 3326, 23129, 11313, 8985
platelet activation	GO:0030168	0.00232424	7	1.80981	154	MYL9, COL3A1, APOE, COL1A2, FCER1G, DGKA, CSRP1	10398, 1281, 348, 1278, 2207, 1606, 1465
negative regulation of cellular protein metabolic process	GO:0032269	0.00233319	24	12.8215	1091	CASP3, TSC2, SIRT2, PRNP, PZP, NCOA7, PNKP, THBS1, RPL23, TSPO, FBXO7, APOE, RBM3, C4A, CAST, APLP2, ITIH3, SFRP2, HSP90AB1, ANXA8, NCL, NCK2, GSTP1, CST3	836, 7249, 22933, 5621, 5858, 135112, 11284, 7057, 9349, 706, 25793, 348, 5935, 720, 831, 334, 3699, 6423, 3326, 653145, 4691, 8440, 2950, 1471
cellular modified amino acid metabolic process	GO:0006575	0.00234262	8	2.31515	197	PLOD1, IDH1, GSTM4, GSTT1, GSTP1, SERINC1, PLOD2, PLOD3	5351, 3417, 2948, 2952, 2950, 57515, 5352, 8985
pyrimidine ribonucleotide biosynthetic process	GO:0009220	0.00238309	3	0.270296	23	NME2, UPRT, UPP1	4831, 139596, 7378
apoptotic process	GO:0006915	0.00240106	37	22.9752	1955	CASP3, TSC2, FAM129B, SIRT2, PRNP, F3, COL2A1, NME2, TGM2, CYP1B1, KALRN, SON, AIF1, ITGB1, RABGGTA, THBS1, TSPO, APOE, IGF2R, ANO6, FHL2, PTTG1IP, FCER1G, CAST, RSL1D1, SFRP2, HSP90AB1, NCK2, EEF1E1, SORT1, GSTP1, ICAM1, ARHGEF2, CTSH, ITGA5, ARHGEF12, DHRS2	836, 7249, 64855, 22933, 5621, 2152, 1280, 4831, 7052, 1545, 8997, 6651, 199, 3688, 5875, 7057, 706, 348, 3482, 196527, 2274, 754, 2207, 831, 26156, 6423, 3326, 8440, 9521, 6272, 2950, 3383, 9181, 1512, 3678, 23365, 10202
response to interferon-gamma	GO:0034341	0.00241716	8	2.3269	198	CDC42EP4, AIF1, VCAM1, HLA-DRA, FLNB, HSP90AB1, ICAM1, HLA-DRB1	23580, 199, 7412, 3122, 2317, 3326, 3383, 3123
cellular response to oxidative stress	GO:0034599	0.00246173	10	3.43159	292	SIRT2, NME2, CYP1B1, AIF1, NCOA7, TPM1, FBXO7, FUT8, DHRS2, PKD2	22933, 4831, 1545, 199, 135112, 7168, 25793, 2530, 10202, 5311
ear morphogenesis	GO:0042471	0.00249629	6	1.36323	116	ITGA8, COL2A1, COL11A1, RPL38, PTK7, CTHRC1	8516, 1280, 1301, 6169, 5754, 115908
regulation of catalytic activity	GO:0050790	0.00250719	42	27.1354	2309	CASP3, TSC2, PRNP, F3, STIM1, PRKACB, KALRN, PZP, ITGB1, TPM1, FN1, B3GAT3, PNKP, THBS1, RPL23, FBXO7, APOE, ANTXR1, C4A, CAST, HNRNPA2B1, APLP2, ITIH3, RCVRN, MAPRE2, SFRP2, HSP90AB1, ANXA8, ASPH, RANBP2, NCK2, RCN3, PLXND1, SORT1, GSTP1, ICAM1, CST3, CTSH, TPM2, ARHGEF12, SERINC1, WDR91	836, 7249, 5621, 2152, 6786, 5567, 8997, 5858, 3688, 7168, 2335, 26229, 11284, 7057, 9349, 25793, 348, 84168, 720, 831, 3181, 334, 3699, 5957, 10982, 6423, 3326, 653145, 444, 5903, 8440, 57333, 23129, 6272, 2950, 3383, 1471, 1512, 7169, 23365, 57515, 29062
enzyme linked receptor protein signaling pathway	GO:0007167	0.00253304	23	12.1633	1035	CASP3, LTBP1, TSC2, ITGA8, FAM129B, SIRT2, F3, KALRN, ITGB1, SDC2, COL3A1, THBS1, IGF2R, POLR2E, COL1A2, GPC1, SFRP2, HSP90AB1, NCK2, SORT1, FUT8, MYOF, ITGA5	836, 4052, 7249, 8516, 64855, 22933, 2152, 8997, 3688, 6383, 1281, 7057, 3482, 5434, 1278, 2817, 6423, 3326, 8440, 6272, 2530, 26509, 3678
cell activation	GO:0001775	0.00258506	29	16.7231	1423	MYL9, CASP3, HMOX2, PRNP, NME2, ITGAL, IDH1, AIF1, ITGB1, VCAM1, COL3A1, THBS1, FBXO7, APOE, IGF2R, ANO6, COL1A2, FCER1G, DGKA, HSP90AB1, UBR4, NCK2, GSTP1, ICAM1, COMMD9, CST3, CTSH, CSRP1, DHRS2	10398, 836, 3163, 5621, 4831, 3683, 3417, 199, 3688, 7412, 1281, 7057, 25793, 348, 3482, 196527, 1278, 2207, 1606, 3326, 23352, 8440, 2950, 3383, 29099, 1471, 1512, 1465, 10202
reactive oxygen species biosynthetic process	GO:1903409	0.00260595	6	1.37499	117	CYP1B1, AIF1, TSPO, HSP90AB1, ICAM1, PKD2	1545, 199, 706, 3326, 3383, 5311
regulation of cell motility	GO:2000145	0.00260829	22	11.4582	975	GLUL, F3, CYP1B1, AIF1, TPM1, FN1, COL3A1, THBS1, APOE, LIMCH1, ANO6, RIPOR1, JAG1, MAPRE2, SFRP2, PLXND1, GSTP1, ICAM1, SPARC, ARHGEF2, CTSH, ITGA5	2752, 2152, 1545, 199, 7168, 2335, 1281, 7057, 348, 22998, 196527, 79567, 182, 10982, 6423, 23129, 2950, 3383, 6678, 9181, 1512, 3678
positive regulation of angiogenesis	GO:0045766	0.00265198	8	2.36216	201	F3, STIM1, CYP1B1, ITGB1, THBS1, SFRP2, CTSH, ITGA5	2152, 6786, 1545, 3688, 7057, 6423, 1512, 3678
protein import into nucleus	GO:0006606	0.00268409	7	1.85682	158	TSC2, KPNA2, RPL23, PTTG1IP, HSP90AB1, RANBP2, RBM22	7249, 3838, 9349, 754, 3326, 5903, 55696
glutamine metabolic process	GO:0006541	0.00270007	3	0.282049	24	GLUL, GLS, PHGDH	2752, 2744, 26227
cellular response to oxygen-containing compound	GO:1901701	0.00274944	24	12.986	1105	TSC2, SIRT2, PRNP, NME2, PRKACB, CYP1B1, AIF1, TPM1, COL3A1, SPP1, RPL23, TSPO, SRSF5, COL1A2, COL16A1, COL5A2, PTK7, GSTP1, ICAM1, ARHGEF2, ATP2B1, RAB8B, PKD2, ATP1A3	7249, 22933, 5621, 4831, 5567, 1545, 199, 7168, 1281, 6696, 9349, 706, 6430, 1278, 1307, 1290, 5754, 2950, 3383, 9181, 490, 51762, 5311, 478
regulation of transforming growth factor beta activation	GO:1901388	0.00277639	2	0.0822642	7	LTBP1, HSP90AB1	4052, 3326
tendon development	GO:0035989	0.00277639	2	0.0822642	7	COL11A1, COL5A1	1301, 1289
regulation of smooth muscle cell chemotaxis	GO:0071671	0.00277639	2	0.0822642	7	AIF1, GSTP1	199, 2950
L-serine biosynthetic process	GO:0006564	0.00277639	2	0.0822642	7	PHGDH, PSAT1	26227, 29968
regulation of coagulation	GO:0050818	0.00280582	5	0.963666	82	F3, THBS1, APOE, ANO6, FCER1G	2152, 7057, 348, 196527, 2207
regulation of cell adhesion	GO:0030155	0.00282859	17	7.97962	679	CASP3, PRNP, TGM2, CYP1B1, AIF1, VCAM1, TPM1, FN1, THBS1, LIMCH1, COL16A1, JAG1, SFRP2, NCK2, PLXND1, ICAM1, ITGA5	836, 5621, 7052, 1545, 199, 7412, 7168, 2335, 7057, 22998, 1307, 182, 6423, 8440, 23129, 3383, 3678
embryo development ending in birth or egg hatching	GO:0009792	0.00282901	16	7.29801	621	TSC2, COL2A1, PRKACB, ITGB1, TPM1, PHGDH, COL11A1, TM4SF1, SFRP2, PTK7, CTHRC1, FUT8, PKD2, ND4, SLC30A1, PLOD3	7249, 1280, 5567, 3688, 7168, 26227, 1301, 4071, 6423, 5754, 115908, 2530, 5311, 4538, 7779, 8985
plasma membrane bounded cell projection organization	GO:0120036	0.00287892	30	17.628	1500	CASP3, FAM129B, CDC42EP4, PRNP, NME2, KALRN, AIF1, ITGB1, TPM1, FN1, SDC2, PHGDH, SPP1, TSPO, FBXO7, APOE, ANO6, TRAPPC4, GPC1, SFRP2, HSP90AB1, PTK7, NCK2, PLXND1, CTHRC1, ICAM1, LYPLA2, GLDN, RAB8B, ATP1A3	836, 64855, 23580, 5621, 4831, 8997, 199, 3688, 7168, 2335, 6383, 26227, 6696, 706, 25793, 348, 196527, 51399, 2817, 6423, 3326, 5754, 8440, 23129, 115908, 3383, 11313, 342035, 51762, 478
negative regulation of endopeptidase activity	GO:0010951	0.00288028	9	2.93801	250	PZP, THBS1, C4A, CAST, APLP2, ITIH3, SFRP2, ANXA8, CST3	5858, 7057, 720, 831, 334, 3699, 6423, 653145, 1471
transport	GO:0006810	0.00291075	79	59.9941	5105	TSC2, FAM129B, HMOX2, GLUL, PRNP, NUP210, STIM1, NME2, UPRT, TGM2, POFUT2, ITGAL, WLS, KALRN, PNKD, IDH1, GLS, AIF1, ITGB1, KPNA2, VPS4A, RRS1, FN1, B3GAT3, SLC1A3, THBS1, SELENBP1, SPP1, RPL23, TSPO, FBXO7, APOE, IGF2R, ANO6, SRSF5, PTTG1IP, ANTXR1, CYB5A, HDLBP, FCER1G, C4A, RIPOR1, SDF4, HNRNPA2B1, APLP2, ITIH3, ABCD3, TRAPPC4, RCVRN, GJA1, HSP90AB1, ANXA8, RPL38, ASPH, UBR4, RANBP2, SLC20A2, …	7249, 64855, 3163, 2752, 5621, 23225, 6786, 4831, 139596, 7052, 23275, 3683, 79971, 8997, 25953, 3417, 2744, 199, 3688, 3838, 27183, 23212, 2335, 26229, 6507, 7057, 8991, 6696, 9349, 706, 25793, 348, 3482, 196527, 6430, 754, 84168, 1528, 3069, 2207, 720, 79567, 51150, 3181, 334, 3699, 5825, 51399, 5957, 2697, 3326, 653145, 6169, 444, 23352, 5903, 6575, 57333, 66005, 6272, 2950, 3383, 4074, 29099,…
muscle tissue development	GO:0060537	0.00300995	12	4.73606	403	ITGA8, FAM129B, SIRT2, LUC7L, ITGB1, TPM1, COL3A1, FHL2, COL11A1, FLNB, GPC1, PKD2	8516, 64855, 22933, 55692, 3688, 7168, 1281, 2274, 1301, 2317, 2817, 5311
animal organ morphogenesis	GO:0009887	0.00302361	22	11.5992	987	ITGA8, STIM1, COL2A1, TGM2, COL12A1, TPM1, COL3A1, FHL2, COL1A2, COL11A1, JAG1, COL5A1, COL5A2, SFRP2, RPL38, PTK7, PLXND1, CTHRC1, CTSH, GPC4, PKD2, PLOD3	8516, 6786, 1280, 7052, 1303, 7168, 1281, 2274, 1278, 1301, 182, 1289, 1290, 6423, 6169, 5754, 23129, 115908, 1512, 2239, 5311, 8985
sensory organ morphogenesis	GO:0090596	0.00303669	9	2.96151	252	ITGA8, COL2A1, COL11A1, JAG1, COL5A1, COL5A2, RPL38, PTK7, CTHRC1	8516, 1280, 1301, 182, 1289, 1290, 6169, 5754, 115908
positive regulation of blood coagulation	GO:0030194	0.00304185	3	0.293801	25	F3, THBS1, ANO6	2152, 7057, 196527
positive regulation of hemostasis	GO:1900048	0.00304185	3	0.293801	25	F3, THBS1, ANO6	2152, 7057, 196527
pyrimidine ribonucleotide metabolic process	GO:0009218	0.00304185	3	0.293801	25	NME2, UPRT, UPP1	4831, 139596, 7378
extrinsic apoptotic signaling pathway via death domain receptors	GO:0008625	0.00311534	5	0.98717	84	THBS1, SFRP2, SORT1, ICAM1, ARHGEF2	7057, 6423, 6272, 3383, 9181
cell development	GO:0048468	0.00312215	39	24.973	2125	CASP3, ITGA8, FAM129B, SIRT2, PABPC4, NME2, KALRN, COL12A1, ITGB1, TPM1, FN1, SDC2, SLC1A3, PHGDH, COL3A1, SPP1, TSPO, FBXO7, APOE, FHL2, ANTXR1, COL11A1, FLNB, JAG1, TRAPPC4, GPC1, SFRP2, HSP90AB1, PTK7, NCK2, PLXND1, CTHRC1, GSTP1, ICAM1, ARHGEF2, LYPLA2, GLDN, MYOF, PLOD3	836, 8516, 64855, 22933, 8761, 4831, 8997, 1303, 3688, 7168, 2335, 6383, 6507, 26227, 1281, 6696, 706, 25793, 348, 2274, 84168, 1301, 2317, 182, 51399, 2817, 6423, 3326, 5754, 8440, 23129, 115908, 2950, 3383, 9181, 11313, 342035, 26509, 8985
cellular protein localization	GO:0034613	0.00322567	35	21.753	1851	TSC2, PRNP, NUP210, ITGAL, WLS, GNL3, IDH1, ITGB1, KPNA2, VPS4A, RRS1, B3GAT3, RPL23, TSPO, FBXO7, APOE, YBX1, SRSF5, PTTG1IP, FCER1G, RIPOR1, FLNB, HNRNPA2B1, MAPRE2, HSP90AB1, RPL38, RANBP2, OTUD7B, SYNE1, M6PR, RBM22, ARHGEF2, RAB8B, GPC4, NUCB1	7249, 5621, 23225, 3683, 79971, 26354, 3417, 3688, 3838, 27183, 23212, 26229, 9349, 706, 25793, 348, 4904, 6430, 754, 2207, 79567, 2317, 3181, 10982, 3326, 6169, 5903, 56957, 23345, 4074, 55696, 9181, 51762, 2239, 4924
cellular lipid catabolic process	GO:0044242	0.00326939	8	2.44442	208	SIRT2, CYP1B1, IDH1, APOE, ABCD3, HIBCH, ACBD5, IVD	22933, 1545, 3417, 348, 5825, 26275, 91452, 3712
positive regulation of cellular process	GO:0048522	0.00335437	82	63.0731	5367	CASP3, TSC2, ITGA8, FAM129B, LMCD1, SIRT2, GLUL, CDC42EP4, PRNP, F3, NME2, TGM2, PRKACB, CYP1B1, WLS, GNL3, KALRN, MARCKSL1, AIF1, ITGB1, NCOA7, VCAM1, VPS4A, TPM1, FN1, PNKP, SLC1A3, COL3A1, THBS1, SPP1, RPL23, TSPO, FBXO7, APOE, YBX1, LIMCH1, RBM3, CNOT4, IGF2R, TRA2A, ANO6, FHL2, SRSF5, PTTG1IP, ANTXR1, PDLIM1, MPP2, COL16A1, FCER1G, C4A, RIPOR1, TNKS1BP1, HNRNPA2B1, JAG1, GPC1, RCVRN, MAPRE2,…	836, 7249, 8516, 64855, 29995, 22933, 2752, 23580, 5621, 2152, 4831, 7052, 5567, 1545, 79971, 26354, 8997, 65108, 199, 3688, 135112, 7412, 27183, 7168, 2335, 11284, 6507, 1281, 7057, 6696, 9349, 706, 25793, 348, 4904, 22998, 5935, 4850, 3482, 29896, 196527, 2274, 6430, 754, 84168, 9124, 4355, 1307, 2207, 720, 79567, 85456, 3181, 182, 2817, 5957, 10982, 2697, 6423, 3326, 4691, 444, 5903, 5754, 844…
positive regulation of coagulation	GO:0050820	0.00340902	3	0.305553	26	F3, THBS1, ANO6	2152, 7057, 196527
regulation of amyloid precursor protein catabolic process	GO:1902991	0.00340902	3	0.305553	26	CASP3, PRNP, APOE	836, 5621, 348
nucleocytoplasmic transport	GO:0006913	0.00343532	11	4.19547	357	TSC2, NUP210, KPNA2, RRS1, RPL23, SRSF5, PTTG1IP, HNRNPA2B1, HSP90AB1, RANBP2, RBM22	7249, 23225, 3838, 23212, 9349, 6430, 754, 3181, 3326, 5903, 55696
heart morphogenesis	GO:0003007	0.00345716	9	3.02027	257	COL2A1, TPM1, FHL2, COL11A1, JAG1, COL5A1, SFRP2, PLXND1, PKD2	1280, 7168, 2274, 1301, 182, 1289, 6423, 23129, 5311
aspartate family amino acid metabolic process	GO:0009066	0.00346341	4	0.622857	53	PLOD1, PHGDH, PLOD2, PLOD3	5351, 26227, 5352, 8985
mRNA splice site selection	GO:0006376	0.00346341	4	0.622857	53	SF3A1, LUC7L, SF1, SRSF5	10291, 55692, 7536, 6430
response to metal ion	GO:0010038	0.00350853	11	4.20722	358	CASP3, PRNP, STIM1, VCAM1, THBS1, TSPO, CYB5A, ICAM1, SPARC, PKD2, SLC30A1	836, 5621, 6786, 7412, 7057, 706, 1528, 3383, 6678, 5311, 7779
cellular macromolecule localization	GO:0070727	0.00354874	35	21.8823	1862	TSC2, PRNP, NUP210, ITGAL, WLS, GNL3, IDH1, ITGB1, KPNA2, VPS4A, RRS1, B3GAT3, RPL23, TSPO, FBXO7, APOE, YBX1, SRSF5, PTTG1IP, FCER1G, RIPOR1, FLNB, HNRNPA2B1, MAPRE2, HSP90AB1, RPL38, RANBP2, OTUD7B, SYNE1, M6PR, RBM22, ARHGEF2, RAB8B, GPC4, NUCB1	7249, 5621, 23225, 3683, 79971, 26354, 3417, 3688, 3838, 27183, 23212, 26229, 9349, 706, 25793, 348, 4904, 6430, 754, 2207, 79567, 2317, 3181, 10982, 3326, 6169, 5903, 56957, 23345, 4074, 55696, 9181, 51762, 2239, 4924
establishment of localization	GO:0051234	0.00360171	80	61.3691	5222	TSC2, ITGA8, FAM129B, HMOX2, GLUL, PRNP, NUP210, STIM1, NME2, UPRT, TGM2, POFUT2, ITGAL, WLS, KALRN, PNKD, IDH1, GLS, AIF1, ITGB1, KPNA2, VPS4A, RRS1, FN1, B3GAT3, SLC1A3, THBS1, SELENBP1, SPP1, RPL23, TSPO, FBXO7, APOE, IGF2R, ANO6, SRSF5, PTTG1IP, ANTXR1, CYB5A, HDLBP, FCER1G, C4A, RIPOR1, SDF4, HNRNPA2B1, APLP2, ITIH3, ABCD3, TRAPPC4, RCVRN, GJA1, HSP90AB1, ANXA8, RPL38, ASPH, UBR4, RANBP2, SL…	7249, 8516, 64855, 3163, 2752, 5621, 23225, 6786, 4831, 139596, 7052, 23275, 3683, 79971, 8997, 25953, 3417, 2744, 199, 3688, 3838, 27183, 23212, 2335, 26229, 6507, 7057, 8991, 6696, 9349, 706, 25793, 348, 3482, 196527, 6430, 754, 84168, 1528, 3069, 2207, 720, 79567, 51150, 3181, 334, 3699, 5825, 51399, 5957, 2697, 3326, 653145, 6169, 444, 23352, 5903, 6575, 57333, 66005, 6272, 2950, 3383, 4074, …
cellular process	GO:0009987	0.00364084	209	198.069	16854	MYL9, CASP3, LTBP1, TSC2, ITGA8, FAM129B, LMCD1, PLOD1, EBNA1BP2, LACTB2, SIRT2, HMOX2, CDH6, GLUL, PABPC4, CDC42EP4, PRNP, F3, EDC3, ACSS2, STIM1, CADM3, COL2A1, NME2, UPRT, TGM2, POFUT2, PRKACB, CYP1B1, SF3A1, ITGAL, WLS, UPP1, GNL3, KALRN, MARCKSL1, TNS1, GRWD1, PNKD, IDH1, LUC7L, SON, COL12A1, MAN2A2, GLS, PZP, STT3A, AIF1, ITGB1, NCOA7, KPNA2, VCAM1, VPS4A, RRS1, TPM1, BLMH, MRTO4, HLA-DRA, …	10398, 836, 4052, 7249, 8516, 64855, 29995, 5351, 10969, 51110, 22933, 3163, 1004, 2752, 8761, 23580, 5621, 2152, 80153, 55902, 6786, 57863, 1280, 4831, 139596, 7052, 23275, 5567, 1545, 10291, 3683, 79971, 7378, 26354, 8997, 65108, 7145, 83743, 25953, 3417, 55692, 6651, 1303, 4122, 2744, 5858, 3703, 199, 3688, 135112, 3838, 7412, 27183, 23212, 7168, 642, 51154, 3122, 2275, 2335, 26229, 6383, 1128…
nuclear transport	GO:0051169	0.0036587	11	4.23073	360	TSC2, NUP210, KPNA2, RRS1, RPL23, SRSF5, PTTG1IP, HNRNPA2B1, HSP90AB1, RANBP2, RBM22	7249, 23225, 3838, 23212, 9349, 6430, 754, 3181, 3326, 5903, 55696
intrinsic apoptotic signaling pathway in response to osmotic stress	GO:0008627	0.00367283	2	0.0940162	8	CASP3, ARHGEF2	836, 9181
T cell activation via T cell receptor contact with antigen bound to MHC molecule on antigen presenting cell	GO:0002291	0.00367283	2	0.0940162	8	ITGAL, ICAM1	3683, 3383
negative regulation of autophagy of mitochondrion	GO:1903147	0.00367283	2	0.0940162	8	TSC2, TSPO	7249, 706
intracellular protein transport	GO:0006886	0.00369094	24	13.2915	1131	TSC2, PRNP, NUP210, WLS, IDH1, KPNA2, VPS4A, RRS1, B3GAT3, RPL23, TSPO, FBXO7, SRSF5, PTTG1IP, RIPOR1, HNRNPA2B1, HSP90AB1, RPL38, RANBP2, M6PR, RBM22, ARHGEF2, RAB8B, NUCB1	7249, 5621, 23225, 79971, 3417, 3838, 27183, 23212, 26229, 9349, 706, 25793, 6430, 754, 79567, 3181, 3326, 6169, 5903, 4074, 55696, 9181, 51762, 4924
glutathione metabolic process	GO:0006749	0.00370655	4	0.634609	54	IDH1, GSTM4, GSTT1, GSTP1	3417, 2948, 2952, 2950
cardiac ventricle development	GO:0003231	0.0037627	6	1.48075	126	LTBP1, TPM1, COL11A1, JAG1, SFRP2, PTK7	4052, 7168, 1301, 182, 6423, 5754
amyloid-beta formation	GO:0034205	0.00380216	3	0.317305	27	CASP3, PRNP, APOE	836, 5621, 348
protein N-linked glycosylation via asparagine	GO:0018279	0.00380216	3	0.317305	27	STT3A, FUT8, OSTC	3703, 2530, 58505
negative regulation of peptidase activity	GO:0010466	0.00382584	9	3.06728	261	PZP, THBS1, C4A, CAST, APLP2, ITIH3, SFRP2, ANXA8, CST3	5858, 7057, 720, 831, 334, 3699, 6423, 653145, 1471
response to hypoxia	GO:0001666	0.00385579	10	3.65488	311	CASP3, PLOD1, SIRT2, HMOX2, VCAM1, THBS1, PDLIM1, ICAM1, PLOD2, ND4	836, 5351, 22933, 3163, 7412, 7057, 9124, 3383, 5352, 4538
organonitrogen compound catabolic process	GO:1901565	0.00390495	26	14.8781	1266	SIRT2, HMOX2, GLUL, UPP1, GLS, VPS4A, BLMH, SDC2, RPL23, FBXO7, APOE, CNOT4, PTTG1IP, HIBCH, GPC1, HSP90AB1, UBR4, OTUD7B, RCN3, CST3, CTSH, LYPLA2, GPC4, WDR91, SAT2, IVD	22933, 3163, 2752, 7378, 2744, 27183, 642, 6383, 9349, 25793, 348, 4850, 754, 26275, 2817, 3326, 23352, 56957, 57333, 1471, 1512, 11313, 2239, 29062, 112483, 3712
isoprenoid metabolic process	GO:0006720	0.00391143	6	1.49251	127	CYP1B1, SDC2, APOE, FDFT1, GPC1, GPC4	1545, 6383, 348, 2222, 2817, 2239
response to ethanol	GO:0045471	0.00391143	6	1.49251	127	VCAM1, SDF4, GSTP1, ICAM1, SPARC, ND4	7412, 51150, 2950, 3383, 6678, 4538
neural tube closure	GO:0001843	0.00399591	5	1.04593	89	TSC2, PRKACB, SFRP2, PTK7, CTHRC1	7249, 5567, 6423, 5754, 115908
myeloid leukocyte activation	GO:0002274	0.00402386	16	7.5683	644	HMOX2, NME2, ITGAL, IDH1, AIF1, THBS1, IGF2R, ANO6, FCER1G, HSP90AB1, UBR4, GSTP1, COMMD9, CST3, CTSH, DHRS2	3163, 4831, 3683, 3417, 199, 7057, 3482, 196527, 2207, 3326, 23352, 2950, 29099, 1471, 1512, 10202
mRNA metabolic process	GO:0016071	0.00407326	19	9.69542	825	PABPC4, EDC3, SF3A1, LUC7L, SON, MRTO4, RPL23, YBX1, RBM3, CNOT4, SF1, TRA2A, SRSF5, POLR2E, WBP11, TNKS1BP1, HNRNPA2B1, RPL38, RBM22	8761, 80153, 10291, 55692, 6651, 51154, 9349, 4904, 5935, 4850, 7536, 29896, 6430, 5434, 51729, 85456, 3181, 6169, 55696
response to nutrient	GO:0007584	0.0041059	8	2.53844	216	VCAM1, SPP1, BCHE, TSPO, SFRP2, GSTP1, SPARC, ATP2B1	7412, 6696, 590, 706, 6423, 2950, 6678, 490
actin cytoskeleton organization	GO:0030036	0.00414488	16	7.59181	646	CDC42EP4, AIF1, ITGB1, VPS4A, TPM1, FHL3, LIMCH1, PDLIM4, ANTXR1, FLNB, PTK7, NCK2, ICAM1, ARHGEF2, TPM2, CORO2B	23580, 199, 3688, 27183, 7168, 2275, 22998, 8572, 84168, 2317, 5754, 8440, 3383, 9181, 7169, 10391
interferon-gamma-mediated signaling pathway	GO:0060333	0.00419133	5	1.05768	90	VCAM1, HLA-DRA, HSP90AB1, ICAM1, HLA-DRB1	7412, 3122, 3326, 3383, 3123
retinoid metabolic process	GO:0001523	0.00419133	5	1.05768	90	CYP1B1, SDC2, APOE, GPC1, GPC4	1545, 6383, 348, 2817, 2239
tube closure	GO:0060606	0.00419133	5	1.05768	90	TSC2, PRKACB, SFRP2, PTK7, CTHRC1	7249, 5567, 6423, 5754, 115908
peptidyl-asparagine modification	GO:0018196	0.0042218	3	0.329057	28	STT3A, FUT8, OSTC	3703, 2530, 58505
interspecies interaction between organisms	GO:0044419	0.00423416	19	9.73067	828	TSC2, NUP210, ITGB1, KPNA2, VPS4A, HLA-DRA, FN1, APOE, EIF4H, POLR2E, UBP1, HSP90AB1, UBR4, RANBP2, SLC20A2, ICAM1, COPS7B, ITGA5, SLC1A5	7249, 23225, 3688, 3838, 27183, 3122, 2335, 348, 7458, 5434, 7342, 3326, 23352, 5903, 6575, 3383, 64708, 3678, 6510
cellular catabolic process	GO:0044248	0.00430591	40	26.2775	2236	CASP3, TSC2, SIRT2, HMOX2, GLUL, PABPC4, EDC3, CYP1B1, UPP1, PNKD, IDH1, GLS, VPS4A, BLMH, MRTO4, RPL23, TSPO, FBXO7, ENO3, APOE, YBX1, CNOT4, EPHX1, GSTM4, PTTG1IP, TNKS1BP1, ABCD3, HIBCH, ABHD10, GPC1, HSP90AB1, RPL38, UBR4, OTUD7B, RCN3, CST3, CTSH, ACBD5, WDR91, IVD	836, 7249, 22933, 3163, 2752, 8761, 80153, 1545, 7378, 25953, 3417, 2744, 27183, 642, 51154, 9349, 706, 25793, 2027, 348, 4904, 4850, 2052, 2948, 754, 85456, 5825, 26275, 55347, 2817, 3326, 6169, 23352, 56957, 57333, 1471, 1512, 91452, 29062, 3712
protein processing	GO:0016485	0.00431078	10	3.71364	316	CASP3, PRNP, F3, PRKACB, THBS1, C4A, CAST, C1QB, ASPH, CTSH	836, 5621, 2152, 5567, 7057, 720, 831, 713, 444, 1512
regulation of embryonic development	GO:0045995	0.00438381	6	1.52776	130	FAM129B, PRKACB, COL5A1, COL5A2, SFRP2, PTK7	64855, 5567, 1289, 1290, 6423, 5754
regulation of epithelial cell apoptotic process	GO:1904035	0.00439349	5	1.06943	91	THBS1, ANO6, CAST, SORT1, ICAM1	7057, 196527, 831, 6272, 3383
fatty acid metabolic process	GO:0006631	0.00439947	11	4.3365	369	ACSS2, CYP1B1, FADS2, GSTM4, PTGR2, ABCD3, HIBCH, GSTP1, LYPLA2, ACBD5, IVD	55902, 1545, 9415, 2948, 145482, 5825, 26275, 2950, 11313, 91452, 3712
neuron projection development	GO:0031175	0.00447932	21	11.2467	957	CASP3, FAM129B, NME2, KALRN, ITGB1, FN1, SDC2, PHGDH, SPP1, TSPO, FBXO7, APOE, TRAPPC4, GPC1, SFRP2, HSP90AB1, PTK7, NCK2, PLXND1, CTHRC1, LYPLA2	836, 64855, 4831, 8997, 3688, 2335, 6383, 26227, 6696, 706, 25793, 348, 51399, 2817, 6423, 3326, 5754, 8440, 23129, 115908, 11313
positive regulation of reactive oxygen species biosynthetic process	GO:1903428	0.00450488	4	0.669865	57	AIF1, HSP90AB1, ICAM1, PKD2	199, 3326, 3383, 5311
generation of neurons	GO:0048699	0.00456417	29	17.4047	1481	CASP3, FAM129B, SIRT2, NME2, KALRN, ITGB1, VCAM1, FN1, SDC2, SLC1A3, PHGDH, COL3A1, SPP1, BCHE, TSPO, FBXO7, APOE, JAG1, TRAPPC4, GPC1, SFRP2, HSP90AB1, PTK7, NCK2, PLXND1, CTHRC1, ARHGEF2, LYPLA2, GLDN	836, 64855, 22933, 4831, 8997, 3688, 7412, 2335, 6383, 6507, 26227, 1281, 6696, 590, 706, 25793, 348, 182, 51399, 2817, 6423, 3326, 5754, 8440, 23129, 115908, 9181, 11313, 342035
positive regulation of molecular function	GO:0044093	0.00459165	33	20.613	1754	CASP3, TSC2, FAM129B, SIRT2, PRNP, F3, STIM1, PRKACB, KALRN, ITGB1, TPM1, FN1, B3GAT3, PNKP, THBS1, APOE, ANTXR1, HNRNPA2B1, RCVRN, MAPRE2, SFRP2, HSP90AB1, ASPH, RANBP2, RCN3, PLXND1, CTHRC1, ICAM1, ARHGEF2, CTSH, ARHGEF12, SERINC1, PKD2	836, 7249, 64855, 22933, 5621, 2152, 6786, 5567, 8997, 3688, 7168, 2335, 26229, 11284, 7057, 348, 84168, 3181, 5957, 10982, 6423, 3326, 444, 5903, 57333, 23129, 115908, 3383, 9181, 1512, 23365, 57515, 5311
regulation of steroid biosynthetic process	GO:0050810	0.00460249	5	1.08119	92	TSPO, APOE, FDFT1, SF1, IGFBP7	706, 348, 2222, 7536, 3490
positive regulation of transforming growth factor beta receptor signaling pathway	GO:0030511	0.00466845	3	0.340809	29	ITGA8, THBS1, HSP90AB1	8516, 7057, 3326
pyrimidine nucleoside biosynthetic process	GO:0046134	0.00466845	3	0.340809	29	NME2, UPRT, UPP1	4831, 139596, 7378
positive regulation of cellular response to transforming growth factor beta stimulus	GO:1903846	0.00466845	3	0.340809	29	ITGA8, THBS1, HSP90AB1	8516, 7057, 3326
neuron development	GO:0048666	0.004669	23	12.7862	1088	CASP3, FAM129B, NME2, KALRN, ITGB1, FN1, SDC2, SLC1A3, PHGDH, SPP1, TSPO, FBXO7, APOE, TRAPPC4, GPC1, SFRP2, HSP90AB1, PTK7, NCK2, PLXND1, CTHRC1, LYPLA2, GLDN	836, 64855, 4831, 8997, 3688, 2335, 6383, 6507, 26227, 6696, 706, 25793, 348, 51399, 2817, 6423, 3326, 5754, 8440, 23129, 115908, 11313, 342035
smooth muscle cell chemotaxis	GO:0071670	0.00468732	2	0.105768	9	AIF1, GSTP1	199, 2950
transforming growth factor beta activation	GO:0036363	0.00468732	2	0.105768	9	LTBP1, HSP90AB1	4052, 3326
germ cell migration	GO:0008354	0.00468732	2	0.105768	9	ITGB1, PLPP1	3688, 8611
negative regulation of protein metabolic process	GO:0051248	0.00468873	24	13.5501	1153	CASP3, TSC2, SIRT2, PRNP, PZP, NCOA7, PNKP, THBS1, RPL23, TSPO, FBXO7, APOE, RBM3, C4A, CAST, APLP2, ITIH3, SFRP2, HSP90AB1, ANXA8, NCL, NCK2, GSTP1, CST3	836, 7249, 22933, 5621, 5858, 135112, 11284, 7057, 9349, 706, 25793, 348, 5935, 720, 831, 334, 3699, 6423, 3326, 653145, 4691, 8440, 2950, 1471
regulation of extrinsic apoptotic signaling pathway via death domain receptors	GO:1902041	0.00479475	4	0.681617	58	THBS1, SFRP2, ICAM1, ARHGEF2	7057, 6423, 3383, 9181
mesoderm development	GO:0007498	0.00489701	6	1.56302	133	ITGA8, POFUT2, WLS, ITGB1, SFRP2, RPL38	8516, 23275, 79971, 3688, 6423, 6169
leukocyte migration	GO:0050900	0.00489976	13	5.68798	484	ITGAL, AIF1, ITGB1, VCAM1, FN1, SDC2, THBS1, ANO6, COL1A2, FCER1G, GPC1, ICAM1, ITGA5	3683, 199, 3688, 7412, 2335, 6383, 7057, 196527, 1278, 2207, 2817, 3383, 3678
response to decreased oxygen levels	GO:0036293	0.00491165	10	3.78415	322	CASP3, PLOD1, SIRT2, HMOX2, VCAM1, THBS1, PDLIM1, ICAM1, PLOD2, ND4	836, 5351, 22933, 3163, 7412, 7057, 9124, 3383, 5352, 4538
regulation of vasculature development	GO:1901342	0.00494312	12	5.04162	429	FAM129B, GLUL, F3, STIM1, CYP1B1, ITGB1, THBS1, SFRP2, PLXND1, SPARC, CTSH, ITGA5	64855, 2752, 2152, 6786, 1545, 3688, 7057, 6423, 23129, 6678, 1512, 3678
antigen processing and presentation	GO:0019882	0.00500777	7	2.08011	177	HLA-DRA, THBS1, FCER1G, ICAM1, HLA-DRB1, CTSH, RAB8B	3122, 7057, 2207, 3383, 3123, 1512, 51762
neutrophil degranulation	GO:0043312	0.00506868	13	5.71148	486	HMOX2, NME2, ITGAL, IDH1, IGF2R, ANO6, FCER1G, HSP90AB1, UBR4, GSTP1, COMMD9, CST3, CTSH	3163, 4831, 3683, 3417, 3482, 196527, 2207, 3326, 23352, 2950, 29099, 1471, 1512
extrinsic apoptotic signaling pathway	GO:0097191	0.00509869	8	2.63245	224	CASP3, COL2A1, THBS1, SFRP2, SORT1, GSTP1, ICAM1, ARHGEF2	836, 1280, 7057, 6423, 6272, 2950, 3383, 9181
rRNA transcription	GO:0009303	0.0051426	3	0.352561	30	NPM3, NCL, NIFK	10360, 4691, 84365
heme metabolic process	GO:0042168	0.0051426	3	0.352561	30	HMOX2, TSPO, IBA57	3163, 706, 200205
regulation of localization	GO:0032879	0.00519613	47	32.5178	2767	TSC2, GLUL, PRNP, F3, STIM1, POFUT2, CYP1B1, WLS, GNL3, KALRN, PNKD, AIF1, ITGB1, VPS4A, TPM1, FN1, B3GAT3, COL3A1, THBS1, SPP1, TSPO, APOE, LIMCH1, ANO6, FCER1G, C4A, RSL1D1, RIPOR1, JAG1, RCVRN, MAPRE2, SFRP2, HSP90AB1, OTUD7B, PLXND1, GSTP1, ICAM1, SPARC, RBM22, ARHGEF2, CTSH, RAB8B, GPC4, ITGA5, NUCB1, PKD2, SLC30A1	7249, 2752, 5621, 2152, 6786, 23275, 1545, 79971, 26354, 8997, 25953, 199, 3688, 27183, 7168, 2335, 26229, 1281, 7057, 6696, 706, 348, 22998, 196527, 2207, 720, 26156, 79567, 182, 5957, 10982, 6423, 3326, 56957, 23129, 2950, 3383, 6678, 55696, 9181, 1512, 51762, 2239, 3678, 4924, 5311, 7779
regulation of RNA splicing	GO:0043484	0.00526283	6	1.58652	135	SON, RBM3, TRA2A, SRSF5, HNRNPA2B1, RBM22	6651, 5935, 29896, 6430, 3181, 55696
import into nucleus	GO:0051170	0.00531999	7	2.10361	179	TSC2, KPNA2, RPL23, PTTG1IP, HSP90AB1, RANBP2, RBM22	7249, 3838, 9349, 754, 3326, 5903, 55696
neutrophil activation involved in immune response	GO:0002283	0.00533083	13	5.74674	489	HMOX2, NME2, ITGAL, IDH1, IGF2R, ANO6, FCER1G, HSP90AB1, UBR4, GSTP1, COMMD9, CST3, CTSH	3163, 4831, 3683, 3417, 3482, 196527, 2207, 3326, 23352, 2950, 29099, 1471, 1512
regulation of developmental process	GO:0050793	0.0053419	45	30.8491	2625	MYL9, FAM129B, SIRT2, GLUL, CDC42EP4, F3, STIM1, NME2, POFUT2, PRKACB, CYP1B1, KALRN, LUC7L, ITGB1, TPM1, FN1, SDC2, COL3A1, THBS1, SPP1, TSPO, FBXO7, APOE, CNOT4, ANO6, RSL1D1, JAG1, COL5A1, GPC1, COL5A2, SFRP2, HSP90AB1, PTK7, PLXND1, EEF1E1, FBLIM1, CTHRC1, SORT1, ICAM1, SPARC, CST3, ARHGEF2, CTSH, GPC4, ITGA5	10398, 64855, 22933, 2752, 23580, 2152, 6786, 4831, 23275, 5567, 1545, 8997, 55692, 3688, 7168, 2335, 6383, 1281, 7057, 6696, 706, 25793, 348, 4850, 196527, 26156, 182, 1289, 2817, 1290, 6423, 3326, 5754, 23129, 9521, 54751, 115908, 6272, 3383, 6678, 1471, 9181, 1512, 2239, 3678
negative regulation of cell migration	GO:0030336	0.0053475	10	3.83116	326	CYP1B1, AIF1, TPM1, COL3A1, THBS1, APOE, LIMCH1, JAG1, SFRP2, GSTP1	1545, 199, 7168, 1281, 7057, 348, 22998, 182, 6423, 2950
response to antibiotic	GO:0046677	0.0053475	10	3.83116	326	CASP3, CYP1B1, VCAM1, SLC1A3, RPL23, SDF4, GSTP1, ICAM1, SPARC, ND4	836, 1545, 7412, 6507, 9349, 51150, 2950, 3383, 6678, 4538
cell proliferation	GO:0008283	0.00538057	38	24.9495	2123	CASP3, TSC2, FAM129B, SIRT2, GLUL, PRNP, F3, NME2, TGM2, CYP1B1, GNL3, MARCKSL1, AIF1, ITGB1, VCAM1, TPM1, FN1, THBS1, RPL23, BCHE, TSPO, APOE, SF1, IGFBP7, PLPP1, JAG1, MAPRE2, SFRP2, ASPH, NCK2, EEF1E1, CTHRC1, GSTP1, SPARC, ARHGEF2, CTSH, DHRS2, PKD2	836, 7249, 64855, 22933, 2752, 5621, 2152, 4831, 7052, 1545, 26354, 65108, 199, 3688, 7412, 7168, 2335, 7057, 9349, 590, 706, 348, 7536, 3490, 8611, 182, 10982, 6423, 444, 8440, 9521, 115908, 2950, 6678, 9181, 1512, 10202, 5311
peptide cross-linking	GO:0018149	0.00541152	4	0.705121	60	TGM2, FN1, COL3A1, THBS1	7052, 2335, 1281, 7057
reactive oxygen species metabolic process	GO:0072593	0.0054886	9	3.24356	276	SIRT2, CYP1B1, AIF1, THBS1, TSPO, HSP90AB1, GSTP1, ICAM1, PKD2	22933, 1545, 199, 7057, 706, 3326, 2950, 3383, 5311
diterpenoid metabolic process	GO:0016101	0.00550952	5	1.12819	96	CYP1B1, SDC2, APOE, GPC1, GPC4	1545, 6383, 348, 2817, 2239
inner ear morphogenesis	GO:0042472	0.00550952	5	1.12819	96	ITGA8, COL2A1, COL11A1, PTK7, CTHRC1	8516, 1280, 1301, 5754, 115908
primary neural tube formation	GO:0014020	0.00550952	5	1.12819	96	TSC2, PRKACB, SFRP2, PTK7, CTHRC1	7249, 5567, 6423, 5754, 115908
regulation of reactive oxygen species biosynthetic process	GO:1903426	0.00550952	5	1.12819	96	AIF1, TSPO, HSP90AB1, ICAM1, PKD2	199, 706, 3326, 3383, 5311
response to lipoprotein particle	GO:0055094	0.00564604	3	0.364313	31	ITGB1, APOE, FCER1G	3688, 348, 2207
electron transport chain	GO:0022900	0.00564661	7	2.12712	181	PHGDH, NDUFA12, CYB5A, ASPH, NDUFB4, COQ9, ND4	26227, 55967, 1528, 444, 4710, 57017, 4538
ncRNA metabolic process	GO:0034660	0.00566962	14	6.46361	550	EBNA1BP2, RRS1, MRTO4, POLR2E, WBP11, RSL1D1, WDR3, HNRNPA2B1, RRP9, NPM3, NCL, EEF1E1, THUMPD1, NIFK	10969, 23212, 51154, 5434, 51729, 26156, 10885, 3181, 9136, 10360, 4691, 9521, 55623, 84365
response to lipid	GO:0033993	0.00573997	20	10.7531	915	CASP3, NME2, IDH1, AIF1, VCAM1, THBS1, SPP1, BCHE, TSPO, IGF2R, FHL2, IGFBP7, PLPP1, PTK7, GSTP1, ICAM1, SPARC, CTSH, ATP2B1, ATP1A3	836, 4831, 3417, 199, 7412, 7057, 6696, 590, 706, 3482, 2274, 3490, 8611, 5754, 2950, 3383, 6678, 1512, 490, 478
positive regulation of vasculature development	GO:1904018	0.0058065	8	2.69121	229	F3, STIM1, CYP1B1, ITGB1, THBS1, SFRP2, CTSH, ITGA5	2152, 6786, 1545, 3688, 7057, 6423, 1512, 3678
negative regulation of long-term synaptic potentiation	GO:1900272	0.00581395	2	0.11752	10	PRNP, APOE	5621, 348
neuron projection maintenance	GO:1990535	0.00581395	2	0.11752	10	PRNP, ATP1A3	5621, 478
virion attachment to host cell	GO:0019062	0.00581395	2	0.11752	10	HSP90AB1, ICAM1	3326, 3383
dichotomous subdivision of an epithelial terminal unit	GO:0060600	0.00581395	2	0.11752	10	PLXND1, CTSH	23129, 1512
Ras protein signal transduction	GO:0007265	0.00591028	12	5.15914	439	CDC42EP4, KALRN, AIF1, ITGB1, COL3A1, APOE, COL1A2, RIPOR1, MAPRE2, ARHGEF2, RAB8B, ARHGEF12	23580, 8997, 199, 3688, 1281, 348, 1278, 79567, 10982, 9181, 51762, 23365
neurogenesis	GO:0022008	0.00595427	30	18.5447	1578	CASP3, FAM129B, SIRT2, NME2, KALRN, ITGB1, VCAM1, FN1, SDC2, SLC1A3, PHGDH, COL3A1, SPP1, BCHE, TSPO, FBXO7, APOE, JAG1, TRAPPC4, GPC1, SFRP2, HSP90AB1, PTK7, NCK2, PLXND1, CTHRC1, GSTP1, ARHGEF2, LYPLA2, GLDN	836, 64855, 22933, 4831, 8997, 3688, 7412, 2335, 6383, 6507, 26227, 1281, 6696, 590, 706, 25793, 348, 182, 51399, 2817, 6423, 3326, 5754, 8440, 23129, 115908, 2950, 9181, 11313, 342035
regulation of Rho protein signal transduction	GO:0035023	0.00626462	6	1.64528	140	KALRN, ITGB1, COL3A1, APOE, ARHGEF2, ARHGEF12	8997, 3688, 1281, 348, 9181, 23365
regulation of mRNA splicing, via spliceosome	GO:0048024	0.0062678	5	1.16345	99	SON, RBM3, TRA2A, SRSF5, HNRNPA2B1	6651, 5935, 29896, 6430, 3181
neutrophil activation	GO:0042119	0.00628422	13	5.86426	499	HMOX2, NME2, ITGAL, IDH1, IGF2R, ANO6, FCER1G, HSP90AB1, UBR4, GSTP1, COMMD9, CST3, CTSH	3163, 4831, 3683, 3417, 3482, 196527, 2207, 3326, 23352, 2950, 29099, 1471, 1512
neutrophil mediated immunity	GO:0002446	0.0063866	13	5.87601	500	HMOX2, NME2, ITGAL, IDH1, IGF2R, ANO6, FCER1G, HSP90AB1, UBR4, GSTP1, COMMD9, CST3, CTSH	3163, 4831, 3683, 3417, 3482, 196527, 2207, 3326, 23352, 2950, 29099, 1471, 1512
establishment of protein localization to organelle	GO:0072594	0.0064105	14	6.55763	558	TSC2, IDH1, KPNA2, VPS4A, RPL23, TSPO, FBXO7, PTTG1IP, HSP90AB1, RPL38, RANBP2, M6PR, RBM22, RAB8B	7249, 3417, 3838, 27183, 9349, 706, 25793, 754, 3326, 6169, 5903, 4074, 55696, 51762
Wnt signaling pathway, planar cell polarity pathway	GO:0060071	0.00643264	4	0.740377	63	SFRP2, PTK7, CTHRC1, GPC4	6423, 5754, 115908, 2239
response to alcohol	GO:0097305	0.00658682	8	2.74997	234	VCAM1, SDF4, IGFBP7, GSTP1, ICAM1, SPARC, ATP2B1, ND4	7412, 51150, 3490, 2950, 3383, 6678, 490, 4538
cell death	GO:0008219	0.00663241	39	26.113	2222	CASP3, TSC2, FAM129B, SIRT2, PRNP, F3, COL2A1, NME2, TGM2, CYP1B1, KALRN, SON, AIF1, ITGB1, NCOA7, RABGGTA, THBS1, TSPO, FBXO7, APOE, IGF2R, ANO6, FHL2, PTTG1IP, FCER1G, CAST, RSL1D1, SFRP2, HSP90AB1, NCK2, EEF1E1, SORT1, GSTP1, ICAM1, ARHGEF2, CTSH, ITGA5, ARHGEF12, DHRS2	836, 7249, 64855, 22933, 5621, 2152, 1280, 4831, 7052, 1545, 8997, 6651, 199, 3688, 135112, 5875, 7057, 706, 25793, 348, 3482, 196527, 2274, 754, 2207, 831, 26156, 6423, 3326, 8440, 9521, 6272, 2950, 3383, 9181, 1512, 3678, 23365, 10202
immune system process	GO:0002376	0.00668298	51	36.443	3101	MYL9, CASP3, SIRT2, HMOX2, PABPC4, CDC42EP4, PRNP, COL2A1, NME2, PRKACB, ITGAL, IDH1, AIF1, ITGB1, VCAM1, RRS1, HLA-DRA, FN1, SDC2, COL3A1, THBS1, FBXO7, APOE, CNOT4, IGF2R, ANO6, COL1A2, FCER1G, C4A, FLNB, C1QB, JAG1, GPC1, PRRC2C, SFRP2, HSP90AB1, UBR4, OTUD7B, NCK2, CHID1, GSTP1, ICAM1, HLA-DRB1, COMMD9, CST3, ARHGEF2, PLD4, CTSH, RAB8B, ITGA5, DHRS2	10398, 836, 22933, 3163, 8761, 23580, 5621, 1280, 4831, 5567, 3683, 3417, 199, 3688, 7412, 23212, 3122, 2335, 6383, 1281, 7057, 25793, 348, 4850, 3482, 196527, 1278, 2207, 720, 2317, 713, 182, 2817, 23215, 6423, 3326, 23352, 56957, 8440, 66005, 2950, 3383, 3123, 29099, 1471, 9181, 122618, 1512, 51762, 3678, 10202
glycoprotein biosynthetic process	GO:0009101	0.0067036	10	3.96043	337	PLOD1, POFUT2, MAN2A2, STT3A, B3GAT3, KDELC2, FUT8, OSTC, PLOD2, PLOD3	5351, 23275, 4122, 3703, 26229, 143888, 2530, 58505, 5352, 8985
cognition	GO:0050890	0.00672604	9	3.34933	285	CASP3, ITGA8, PRNP, KALRN, ITGB1, HLA-DRA, BCHE, APOE, ITGA5	836, 8516, 5621, 8997, 3688, 3122, 590, 348, 3678
cellular response to lipoprotein particle stimulus	GO:0071402	0.00673634	3	0.387817	33	ITGB1, APOE, FCER1G	3688, 348, 2207
response to cadmium ion	GO:0046686	0.00679947	4	0.752129	64	PRNP, CYB5A, SPARC, SLC30A1	5621, 1528, 6678, 7779
alpha-amino acid catabolic process	GO:1901606	0.00681227	5	1.18695	101	GLUL, GLS, BLMH, HIBCH, IVD	2752, 2744, 642, 26275, 3712
regulation of cellular component movement	GO:0051270	0.00686393	22	12.4454	1059	GLUL, F3, CYP1B1, AIF1, TPM1, FN1, COL3A1, THBS1, APOE, LIMCH1, ANO6, RIPOR1, JAG1, MAPRE2, SFRP2, PLXND1, GSTP1, ICAM1, SPARC, ARHGEF2, CTSH, ITGA5	2752, 2152, 1545, 199, 7168, 2335, 1281, 7057, 348, 22998, 196527, 79567, 182, 10982, 6423, 23129, 2950, 3383, 6678, 9181, 1512, 3678
regulation of cellular response to growth factor stimulus	GO:0090287	0.00687576	9	3.36108	286	LTBP1, ITGA8, FAM129B, THBS1, GPC1, SFRP2, HSP90AB1, MYOF, ITGA5	4052, 8516, 64855, 7057, 2817, 6423, 3326, 26509, 3678
actin filament-based process	GO:0030029	0.00688699	17	8.73175	743	CDC42EP4, AIF1, ITGB1, VPS4A, TPM1, FHL3, LIMCH1, PDLIM4, ANTXR1, FLNB, GJA1, PTK7, NCK2, ICAM1, ARHGEF2, TPM2, CORO2B	23580, 199, 3688, 27183, 7168, 2275, 22998, 8572, 84168, 2317, 2697, 5754, 8440, 3383, 9181, 7169, 10391
granulocyte activation	GO:0036230	0.00691858	13	5.93477	505	HMOX2, NME2, ITGAL, IDH1, IGF2R, ANO6, FCER1G, HSP90AB1, UBR4, GSTP1, COMMD9, CST3, CTSH	3163, 4831, 3683, 3417, 3482, 196527, 2207, 3326, 23352, 2950, 29099, 1471, 1512
negative regulation of amyloid-beta formation	GO:1902430	0.00705115	2	0.129272	11	PRNP, APOE	5621, 348
loop of Henle development	GO:0072070	0.00705115	2	0.129272	11	JAG1, PKD2	182, 5311
UMP metabolic process	GO:0046049	0.00705115	2	0.129272	11	UPRT, UPP1	139596, 7378
pyrimidine ribonucleoside monophosphate metabolic process	GO:0009173	0.00705115	2	0.129272	11	UPRT, UPP1	139596, 7378
regulation of dendritic spine maintenance	GO:1902950	0.00705115	2	0.129272	11	PRNP, APOE	5621, 348
surfactant homeostasis	GO:0043129	0.00705115	2	0.129272	11	RCN3, CTSH	57333, 1512
pyrimidine ribonucleoside monophosphate biosynthetic process	GO:0009174	0.00705115	2	0.129272	11	UPRT, UPP1	139596, 7378
UMP biosynthetic process	GO:0006222	0.00705115	2	0.129272	11	UPRT, UPP1	139596, 7378
negative regulation of activated T cell proliferation	GO:0046007	0.00705115	2	0.129272	11	CASP3, PRNP	836, 5621
regulation of establishment of planar polarity	GO:0090175	0.00717988	4	0.763881	65	SFRP2, PTK7, CTHRC1, GPC4	6423, 5754, 115908, 2239
programmed cell death	GO:0012501	0.00718403	37	24.5617	2090	CASP3, TSC2, FAM129B, SIRT2, PRNP, F3, COL2A1, NME2, TGM2, CYP1B1, KALRN, SON, AIF1, ITGB1, RABGGTA, THBS1, TSPO, APOE, IGF2R, ANO6, FHL2, PTTG1IP, FCER1G, CAST, RSL1D1, SFRP2, HSP90AB1, NCK2, EEF1E1, SORT1, GSTP1, ICAM1, ARHGEF2, CTSH, ITGA5, ARHGEF12, DHRS2	836, 7249, 64855, 22933, 5621, 2152, 1280, 4831, 7052, 1545, 8997, 6651, 199, 3688, 5875, 7057, 706, 348, 3482, 196527, 2274, 754, 2207, 831, 26156, 6423, 3326, 8440, 9521, 6272, 2950, 3383, 9181, 1512, 3678, 23365, 10202
negative regulation of cell motility	GO:2000146	0.00725803	10	4.00744	341	CYP1B1, AIF1, TPM1, COL3A1, THBS1, APOE, LIMCH1, JAG1, SFRP2, GSTP1	1545, 199, 7168, 1281, 7057, 348, 22998, 182, 6423, 2950
regulation of transforming growth factor beta production	GO:0071634	0.00732508	3	0.399569	34	LTBP1, THBS1, HSP90AB1	4052, 7057, 3326
anoikis	GO:0043276	0.00732508	3	0.399569	34	TSC2, ITGB1, ITGA5	7249, 3688, 3678
cellular response to alkaloid	GO:0071312	0.00732508	3	0.399569	34	CASP3, AIF1, ICAM1	836, 199, 3383
mesodermal cell differentiation	GO:0048333	0.00732508	3	0.399569	34	ITGA8, ITGB1, SFRP2	8516, 3688, 6423
peptide metabolic process	GO:0006518	0.00735165	19	10.2595	873	CASP3, PABPC4, PRNP, IDH1, THBS1, RPL23, APOE, RBM3, GSTM4, EIF4H, GFM1, RPL38, NCL, NCK2, EEF1E1, GSTT1, GSTP1, LARP4B, CTSH	836, 8761, 5621, 3417, 7057, 9349, 348, 5935, 2948, 7458, 85476, 6169, 4691, 8440, 9521, 2952, 2950, 23185, 1512
tube formation	GO:0035148	0.00739951	6	1.70404	145	TSC2, TGM2, PRKACB, SFRP2, PTK7, CTHRC1	7249, 7052, 5567, 6423, 5754, 115908
sensory perception of sound	GO:0007605	0.00739951	6	1.70404	145	CASP3, COL2A1, SLC1A3, COL11A1, RPL38, ICAM1	836, 1280, 6507, 1301, 6169, 3383
viral life cycle	GO:0019058	0.00750036	9	3.40809	290	ITGB1, VPS4A, APOE, UBP1, HSP90AB1, SLC20A2, ICAM1, ITGA5, SLC1A5	3688, 27183, 348, 7342, 3326, 6575, 3383, 3678, 6510
regulation of adherens junction organization	GO:1903391	0.00757407	4	0.775633	66	THBS1, LIMCH1, COL16A1, MAPRE2	7057, 22998, 1307, 10982
maintenance of protein location	GO:0045185	0.00768977	5	1.22221	104	LTBP1, TSPO, FLNB, SYNE1, PKD2	4052, 706, 2317, 23345, 5311
neural tube formation	GO:0001841	0.00768977	5	1.22221	104	TSC2, PRKACB, SFRP2, PTK7, CTHRC1	7249, 5567, 6423, 5754, 115908
neuron differentiation	GO:0030182	0.00783346	26	15.7125	1337	CASP3, FAM129B, NME2, KALRN, ITGB1, VCAM1, FN1, SDC2, SLC1A3, PHGDH, SPP1, TSPO, FBXO7, APOE, JAG1, TRAPPC4, GPC1, SFRP2, HSP90AB1, PTK7, NCK2, PLXND1, CTHRC1, ARHGEF2, LYPLA2, GLDN	836, 64855, 4831, 8997, 3688, 7412, 2335, 6383, 6507, 26227, 6696, 706, 25793, 348, 182, 51399, 2817, 6423, 3326, 5754, 8440, 23129, 115908, 9181, 11313, 342035
amyloid precursor protein catabolic process	GO:0042987	0.00794334	3	0.411321	35	CASP3, PRNP, APOE	836, 5621, 348
regulation of vascular endothelial growth factor receptor signaling pathway	GO:0030947	0.00794334	3	0.411321	35	FAM129B, MYOF, ITGA5	64855, 26509, 3678
cellular response to amino acid stimulus	GO:0071230	0.00798224	4	0.787385	67	COL3A1, COL1A2, COL16A1, COL5A2	1281, 1278, 1307, 1290
response to oxygen levels	GO:0070482	0.00800028	10	4.0662	346	CASP3, PLOD1, SIRT2, HMOX2, VCAM1, THBS1, PDLIM1, ICAM1, PLOD2, ND4	836, 5351, 22933, 3163, 7412, 7057, 9124, 3383, 5352, 4538
positive regulation of catalytic activity	GO:0043085	0.00815157	27	16.5586	1409	CASP3, TSC2, PRNP, F3, STIM1, PRKACB, KALRN, ITGB1, TPM1, FN1, B3GAT3, PNKP, THBS1, APOE, ANTXR1, HNRNPA2B1, RCVRN, MAPRE2, SFRP2, HSP90AB1, ASPH, RANBP2, RCN3, ICAM1, CTSH, ARHGEF12, SERINC1	836, 7249, 5621, 2152, 6786, 5567, 8997, 3688, 7168, 2335, 26229, 11284, 7057, 348, 84168, 3181, 5957, 10982, 6423, 3326, 444, 5903, 57333, 3383, 1512, 23365, 57515
phagocytosis	GO:0006909	0.00815551	10	4.07795	347	TGM2, ITGAL, AIF1, ITGB1, THBS1, ANO6, FCER1G, C4A, HSP90AB1, PLD4	7052, 3683, 199, 3688, 7057, 196527, 2207, 720, 3326, 122618
protein O-linked glycosylation	GO:0006493	0.00831666	5	1.24571	106	PLOD1, POFUT2, KDELC2, PLOD2, PLOD3	5351, 23275, 143888, 5352, 8985
import across plasma membrane	GO:0098739	0.00831666	5	1.24571	106	PRNP, SLC1A3, SLC1A5, SLC30A1, ATP1A3	5621, 6507, 6510, 7779, 478
distal tubule development	GO:0072017	0.0083962	2	0.141024	12	JAG1, PKD2	182, 5311
L-serine metabolic process	GO:0006563	0.0083962	2	0.141024	12	PHGDH, PSAT1	26227, 29968
adhesion of symbiont to host cell	GO:0044650	0.0083962	2	0.141024	12	HSP90AB1, ICAM1	3326, 3383
behavioral response to pain	GO:0048266	0.0083962	2	0.141024	12	THBS1, TSPO	7057, 706
locomotory exploration behavior	GO:0035641	0.0083962	2	0.141024	12	C12orf10, APOE	60314, 348
negative regulation of transcription from RNA polymerase II promoter in response to stress	GO:0097201	0.0083962	2	0.141024	12	SIRT2, NCK2	22933, 8440
negative regulation of neurotransmitter secretion	GO:0046929	0.0083962	2	0.141024	12	PNKD, SLC30A1	25953, 7779
regulation of cell shape	GO:0008360	0.00840822	6	1.75105	149	CDC42EP4, TPM1, FN1, PLXND1, FBLIM1, ICAM1	23580, 7168, 2335, 23129, 54751, 3383
cell surface receptor signaling pathway	GO:0007166	0.00859035	49	35.162	2992	CASP3, LTBP1, TSC2, ITGA8, FAM129B, SIRT2, CDH6, PRNP, F3, COL2A1, NME2, PRKACB, ITGAL, WLS, KALRN, ITGB1, VCAM1, HLA-DRA, FN1, SDC2, COL3A1, THBS1, APOE, YBX1, IGF2R, ANO6, MPP2, POLR2E, COL1A2, COL16A1, FCER1G, HNRNPA2B1, JAG1, GPC1, SFRP2, HSP90AB1, PTK7, NCK2, PLXND1, CTHRC1, SORT1, GSTP1, ICAM1, HLA-DRB1, FUT8, ARHGEF2, MYOF, GPC4, ITGA5	836, 4052, 7249, 8516, 64855, 22933, 1004, 5621, 2152, 1280, 4831, 5567, 3683, 79971, 8997, 3688, 7412, 3122, 2335, 6383, 1281, 7057, 348, 4904, 3482, 196527, 4355, 5434, 1278, 1307, 2207, 3181, 182, 2817, 6423, 3326, 5754, 8440, 23129, 115908, 6272, 2950, 3383, 3123, 2530, 9181, 26509, 2239, 3678
transforming growth factor beta production	GO:0071604	0.00859145	3	0.423073	36	LTBP1, THBS1, HSP90AB1	4052, 7057, 3326
regulation of calcium ion import	GO:0090279	0.00859145	3	0.423073	36	PRNP, PKD2, SLC30A1	5621, 5311, 7779
positive regulation of telomerase activity	GO:0051973	0.00859145	3	0.423073	36	PNKP, HNRNPA2B1, HSP90AB1	11284, 3181, 3326
pyrimidine ribonucleoside metabolic process	GO:0046131	0.00859145	3	0.423073	36	NME2, UPRT, UPP1	4831, 139596, 7378
ribonucleoside biosynthetic process	GO:0042455	0.00859145	3	0.423073	36	NME2, UPRT, UPP1	4831, 139596, 7378
negative regulation of calcium-mediated signaling	GO:0050849	0.00859145	3	0.423073	36	PRNP, FHL2, PKD2	5621, 2274, 5311
regulation of cellular protein metabolic process	GO:0032268	0.00859172	44	30.8138	2622	CASP3, TSC2, SIRT2, PRNP, F3, PRKACB, GNL3, PZP, AIF1, NCOA7, FN1, B3GAT3, PNKP, THBS1, RPL23, TSPO, FBXO7, APOE, LIMCH1, RBM3, PTTG1IP, EIF4H, ANTXR1, C4A, CAST, TNKS1BP1, APLP2, ITIH3, SFRP2, HSP90AB1, ANXA8, RPL38, NCL, ASPH, NCK2, RCN3, GSTP1, ICAM1, CST3, ARHGEF2, LARP4B, CTSH, ITGA5, WDR91	836, 7249, 22933, 5621, 2152, 5567, 26354, 5858, 199, 135112, 2335, 26229, 11284, 7057, 9349, 706, 25793, 348, 22998, 5935, 754, 7458, 84168, 720, 831, 85456, 334, 3699, 6423, 3326, 653145, 6169, 4691, 444, 8440, 57333, 2950, 3383, 1471, 9181, 23185, 1512, 3678, 29062
response to alkaloid	GO:0043279	0.00864302	5	1.25747	107	CASP3, AIF1, BCHE, HSP90AB1, ICAM1	836, 199, 590, 3326, 3383
RNA splicing	GO:0008380	0.00870505	12	5.42943	462	SF3A1, LUC7L, SON, YBX1, RBM3, SF1, TRA2A, SRSF5, POLR2E, WBP11, HNRNPA2B1, RBM22	10291, 55692, 6651, 4904, 5935, 7536, 29896, 6430, 5434, 51729, 3181, 55696
learning or memory	GO:0007611	0.0087837	8	2.891	246	CASP3, ITGA8, PRNP, KALRN, ITGB1, BCHE, APOE, ITGA5	836, 8516, 5621, 8997, 3688, 590, 348, 3678
cellular response to transforming growth factor beta stimulus	GO:0071560	0.0087837	8	2.891	246	LTBP1, ITGA8, ITGB1, COL3A1, THBS1, COL1A2, HSP90AB1, FUT8	4052, 8516, 3688, 1281, 7057, 1278, 3326, 2530
positive regulation of proteolysis	GO:0045862	0.00879978	10	4.12496	351	CASP3, SIRT2, F3, FN1, APOE, ANTXR1, SFRP2, ASPH, RCN3, CTSH	836, 22933, 2152, 2335, 348, 84168, 6423, 444, 57333, 1512
positive regulation of hydrolase activity	GO:0051345	0.0089582	17	8.97854	764	CASP3, TSC2, F3, KALRN, ITGB1, TPM1, FN1, ANTXR1, MAPRE2, SFRP2, HSP90AB1, ASPH, RANBP2, RCN3, ICAM1, CTSH, ARHGEF12	836, 7249, 2152, 8997, 3688, 7168, 2335, 84168, 10982, 6423, 3326, 444, 5903, 57333, 3383, 1512, 23365
regulation of cell cycle arrest	GO:0071156	0.00897813	5	1.26922	108	RPL23, CNOT4, TNKS1BP1, HSP90AB1, PKD2	9349, 4850, 85456, 3326, 5311
negative regulation of smooth muscle cell migration	GO:0014912	0.00926972	3	0.434825	37	AIF1, TPM1, GSTP1	199, 7168, 2950
negative regulation of extrinsic apoptotic signaling pathway via death domain receptors	GO:1902042	0.00926972	3	0.434825	37	SFRP2, ICAM1, ARHGEF2	6423, 3383, 9181
porphyrin-containing compound metabolic process	GO:0006778	0.00926972	3	0.434825	37	HMOX2, TSPO, IBA57	3163, 706, 200205
negative regulation of smooth muscle cell proliferation	GO:0048662	0.00929257	4	0.822642	70	AIF1, TPM1, SF1, GSTP1	199, 7168, 7536, 2950
protein localization	GO:0008104	0.00931026	45	31.8245	2708	LTBP1, TSC2, ITGA8, GLUL, PRNP, NUP210, CADM3, ITGAL, WLS, GNL3, IDH1, ITGB1, KPNA2, VPS4A, RRS1, FN1, B3GAT3, SELENBP1, RPL23, TSPO, FBXO7, APOE, YBX1, SRSF5, PTTG1IP, FCER1G, RSL1D1, RIPOR1, FLNB, HNRNPA2B1, MAPRE2, HSP90AB1, RPL38, RANBP2, OTUD7B, RCN3, SYNE1, M6PR, RBM22, ARHGEF2, RAB8B, GPC4, NUCB1, PKD2, PLOD3	4052, 7249, 8516, 2752, 5621, 23225, 57863, 3683, 79971, 26354, 3417, 3688, 3838, 27183, 23212, 2335, 26229, 8991, 9349, 706, 25793, 348, 4904, 6430, 754, 2207, 26156, 79567, 2317, 3181, 10982, 3326, 6169, 5903, 56957, 57333, 23345, 4074, 55696, 9181, 51762, 2239, 4924, 5311, 8985
cellular lipid metabolic process	GO:0044255	0.00964572	22	12.8332	1092	SIRT2, ACSS2, CYP1B1, IDH1, SDC2, APOE, FDFT1, FADS2, GSTM4, DGKA, PTGR2, PLPP1, ABCD3, HIBCH, GPC1, GSTP1, LYPLA2, ACBD5, GPC4, SERINC1, WDR91, IVD	22933, 55902, 1545, 3417, 6383, 348, 2222, 9415, 2948, 1606, 145482, 8611, 5825, 26275, 2817, 2950, 11313, 91452, 2239, 57515, 29062, 3712
ribosomal large subunit biogenesis	GO:0042273	0.00976024	4	0.834394	71	EBNA1BP2, RRS1, RSL1D1, RPL38	10969, 23212, 26156, 6169
protein metabolic process	GO:0019538	0.00983569	86	69.3252	5899	CASP3, LTBP1, TSC2, LMCD1, PLOD1, SIRT2, GLUL, PABPC4, PRNP, F3, COL2A1, NME2, TGM2, POFUT2, PRKACB, GNL3, KALRN, MAN2A2, PZP, STT3A, AIF1, NCOA7, VPS4A, BLMH, FN1, B3GAT3, SDC2, PNKP, COL3A1, RABGGTA, THBS1, SPP1, RPL23, TSPO, FBXO7, APOE, LIMCH1, RBM3, CNOT4, FKBP10, PTTG1IP, EIF4H, ANTXR1, GFM1, FN3KRP, C4A, CAST, COL11A1, TNKS1BP1, IGFBP7, C1QB, PLPP1, APLP2, ITIH3, MINPP1, GPC1, SFRP2, HSP90…	836, 4052, 7249, 29995, 5351, 22933, 2752, 8761, 5621, 2152, 1280, 4831, 7052, 23275, 5567, 26354, 8997, 4122, 5858, 3703, 199, 135112, 27183, 642, 2335, 26229, 6383, 11284, 1281, 5875, 7057, 6696, 9349, 706, 25793, 348, 22998, 5935, 4850, 60681, 754, 7458, 84168, 85476, 79672, 720, 831, 1301, 85456, 3490, 713, 8611, 334, 3699, 9562, 2817, 6423, 3326, 653145, 6169, 4691, 444, 23352, 5903, 56957, …
negative regulation of extracellular matrix organization	GO:1903054	0.00984641	2	0.152776	13	ANTXR1, CST3	84168, 1471
lipoprotein catabolic process	GO:0042159	0.00984641	2	0.152776	13	APOE, LYPLA2	348, 11313
negative regulation of amyloid precursor protein catabolic process	GO:1902992	0.00984641	2	0.152776	13	PRNP, APOE	5621, 348
planar cell polarity pathway involved in neural tube closure	GO:0090179	0.00984641	2	0.152776	13	SFRP2, PTK7	6423, 5754
chemical homeostasis within a tissue	GO:0048875	0.00984641	2	0.152776	13	RCN3, CTSH	57333, 1512
negative regulation of protein maturation	GO:1903318	0.00997841	3	0.446577	38	PRNP, THBS1, CAST	5621, 7057, 831
regulation of calcineurin-NFAT signaling cascade	GO:0070884	0.00997841	3	0.446577	38	LMCD1, PRNP, FHL2	29995, 5621, 2274
negative regulation of protein processing	GO:0010955	0.00997841	3	0.446577	38	PRNP, THBS1, CAST	5621, 7057, 831
regulation of calcineurin-mediated signaling	GO:0106056	0.00997841	3	0.446577	38	LMCD1, PRNP, FHL2	29995, 5621, 2274
positive regulation of epithelial cell apoptotic process	GO:1904037	0.00997841	3	0.446577	38	THBS1, ANO6, SORT1	7057, 196527, 6272
